# Supplementary material for: A regeneration-triggered metabolic adaptation is necessary for cell identity transitions and cell cycle re-entry to support blastema formation and bone regeneration
Source: eLife. 2022 Aug 22;11:e76987. doi: 10.7554/eLife.76987 (PMC9395193; doi:10.7554/eLife.76987)
Supplement: Figure 1—source data 1. [file elife-76987-fig1-data1.xlsx]

## Sheet: Fig1B
										Fig1B
	Biological Replicate	Position	Gene Name	Sample Name	Cq values	Average Cq values House keeping gene (ef1a)	dCq	Log2(-dCq)*100	geoMean	Relative Fold Change
bglap	1	A1	Ef1a	Uncut (0hpa) 1	17.55	17.47						Summary bglap relative fold change
		A2	Ef1a	Uncut (0hpa) 1	17.37								Uncut (0hpa)	6hpa	Fold Change
		A3	Ef1a	Uncut (0hpa) 1	17.49							Biological Rep 1	0.0202939	0.00678794	0.334482
		A4	Ef1a	6hpa 1	17.98	18.07						Biological Rep 2	0.160116	0.0372622	0.23272
		A5	Ef1a	6hpa 1	18.18							Biological Rep 3	0.143972	0.0650273	0.451668
		A6	Ef1a	6hpa 1	18.05							Biological Rep 4	0.108356	0.0350087	0.323088
		C1	bglap	Uncut (0hpa) 1	29.68		12.21	0.0211069	0.0202939	0.334482
		C2	bglap	Uncut (0hpa) 1	29.71		12.24	0.0206725
		C3	bglap	Uncut (0hpa) 1	29.82		12.35	0.0191549
		C4	bglap	6hpa 1	31.8		13.73	0.00735967	0.00678794
		C5	bglap	6hpa 1	31.89		13.82	0.00691457
		C6	bglap	6hpa 1	32.06		13.99	0.00614597
	2	A7	Ef1a	Uncut (0hpa) 2	17.11	16.92
		A8	Ef1a	Uncut (0hpa) 2	16.75
		A9	Ef1a	Uncut (0hpa) 2	16.9
		A10	Ef1a	6hpa 2	15.98	16.2133
		A11	Ef1a	6hpa 2	16.37
		A12	Ef1a	6hpa 2	16.29
		C7	bglap	Uncut (0hpa) 2	26.32		9.4	0.148019	0.160116	0.23272
		C8	bglap	Uncut (0hpa) 2	26.13		9.21	0.168855
		C9	bglap	Uncut (0hpa) 2	26.17		9.25	0.164238
		C10	bglap	6hpa 2	27.6		11.3867	0.0373484	0.0372622
		C11	bglap	6hpa 2	27.56		11.3467	0.0383984
		C12	bglap	6hpa 2	27.65		11.4367	0.0360762
	3	E1	Ef1a	Uncut (0hpa) 3	16.03	15.9233
		E2	Ef1a	Uncut (0hpa) 3	15.85
		E3	Ef1a	Uncut (0hpa) 3	15.89
		E4	Ef1a	6hpa 3	15.33	15.39
		E5	Ef1a	6hpa 3	15.48
		E6	Ef1a	6hpa 3	15.36
		G1	bglap	Uncut (0hpa) 3	25.37		9.44667	0.143308	0.143972	0.451668
		G2	bglap	Uncut (0hpa) 3	25.35		9.42667	0.145308
		G3	bglap	Uncut (0hpa) 3	25.37		9.44667	0.143308
		G4	bglap	6hpa 3	25.93		10.54	0.0671651	0.0650273
		G5	bglap	6hpa 3	25.97		10.58	0.0653285
		G6	bglap	6hpa 3	26.03		10.64	0.0626673
	4	E7	Ef1a	Uncut (0hpa) 4	16.22	16.1467
		E8	Ef1a	Uncut (0hpa) 4	16.16
		E9	Ef1a	Uncut (0hpa) 4	16.06
		E10	Ef1a	6hpa 4	15.08	15.4167
		E11	Ef1a	6hpa 4	15.56
		E12	Ef1a	6hpa 4	15.61
		G7	bglap	Uncut (0hpa) 4	26.07		9.92333	0.102986	0.108356	0.323088
		G8	bglap	Uncut (0hpa) 4	26.03		9.88333	0.105882
		G9	bglap	Uncut (0hpa) 4	25.89		9.74333	0.116671
		G10	bglap	6hpa 4	26.9		11.4833	0.0349279	0.0350087
		G11	bglap	6hpa 4	26.92		11.5033	0.034447
		G12	bglap	6hpa 4	26.87		11.4533	0.0356618
										Fig1B
	Biological Replicate	Position	Gene Name	Sample Name	Cq values	Average Cq values House keeping gene (ef1a)	dCq	Log2(-dCq)*100	geoMean	Relative Fold Change
Runx2a and runx2b	1	A1	Ef1a	Uncut1	18.04	17.7933						Summary Runx2a relative fold change
		A2	Ef1a	Uncut1	17.67								Uncut (0hpa)	6hpa	Fold Change
		A3	Ef1a	Uncut1	17.67							Biological Rep 1	0.345603	0.699238	2.02324
		A4	Ef1a	6hpa 1	18.26	18.2567						Biological Rep 2	0.497875	0.723897	1.45397
		A5	Ef1a	6hpa 1	18.2							Biological Rep 3	0.340059	0.66152	1.94531
		A6	Ef1a	6hpa 1	18.31							Biological Rep 4	0.388824	0.583925	1.50177
		B1	Runx2a	Uncut1	26.11		8.31667	0.313642	0.345603	2.02324
		B2	Runx2a	Uncut1	25.88		8.08667	0.36785
		B3	Runx2a	Uncut1	25.92		8.12667	0.357791				Summary Runx2b relative fold change
		B4	Runx2a	6hpa 1	25.3		7.04333	0.758133	0.699238				Uncut (0hpa)	6hpa	Fold Change
		B5	Runx2a	6hpa 1	25.18		6.92333	0.82389				Biological Rep 1	0.103224	0.080801	0.782773
		B6	Runx2a	6hpa 1	25.77		7.51333	0.547345				Biological Rep 2	0.178896	0.140683	0.786395
		C1	Runx2b	Uncut1	27.75		9.95667	0.100634	0.103224	0.782773		Biological Rep 3	0.149739	0.085804	0.573024
		C2	Runx2b	Uncut1	27.59		9.79667	0.112437				Biological Rep 4	0.198039	0.115331	0.582365
		C3	Runx2b	Uncut1	27.8		10.0067	0.097206
		C4	Runx2b	6hpa 1	28.6		10.3433	0.0769744	0.0808013
		C5	Runx2b	6hpa 1	28.42		10.1633	0.0872031
		C6	Runx2b	6hpa 1	28.57		10.3133	0.0785918
	2	A7	Ef1a	Uncut 2	17.02	17.09
		A8	Ef1a	Uncut 2	17.31
		A9	Ef1a	Uncut 2	16.94
		A10	Ef1a	6hpa 2	16.59	16.6667
		A11	Ef1a	6hpa 2	16.59
		A12	Ef1a	6hpa 2	16.82
		B7	Runx2a	Uncut 2	24.98		7.89	0.421574	0.497875	1.45397
		B8	Runx2a	Uncut 2	24.87		7.78	0.454974
		B9	Runx2a	Uncut 2	24.37		7.28	0.64343
		B10	Runx2a	6hpa 2	23.69		7.02333	0.768716	0.723897
		B11	Runx2a	6hpa 2	23.79		7.12333	0.717238
		B12	Runx2a	6hpa 2	23.85		7.18333	0.68802
		C7	Runx2b	Uncut 2	26.26		9.17	0.173602	0.178896	0.786399
		C8	Runx2b	Uncut 2	26.27		9.18	0.172403
		C9	Runx2b	Uncut 2	26.12		9.03	0.191293
		C10	Runx2b	6hpa 2	26.16		9.49333	0.138746	0.140683
		C11	Runx2b	6hpa 2	26.12		9.45333	0.142647
		C12	Runx2b	6hpa 2	26.27		9.60333	0.128561
	3	E1	Ef1a	Uncut 3	16.05	16.0033
		E2	Ef1a	Uncut 3	16
		E3	Ef1a	Uncut 3	15.96
		E4	Ef1a	6hpa 3	15.9	15.9667
		E5	Ef1a	6hpa 3	16
		E6	Ef1a	6hpa 3	16
		F1	Runx2a	Uncut 3	23.95		7.94667	0.405336	0.340059	1.94531
		F2	Runx2a	Uncut 3	24.33		8.32667	0.311475
		F3	Runx2a	Uncut 3	24.33		8.32667	0.311475
		F4	Runx2a	6hpa 3	22.91		6.94333	0.812547	0.66152
		F5	Runx2a	6hpa 3	23.36		7.39333	0.594819
		F6	Runx2a	6hpa 3	23.35		7.38333	0.598956
		G1	Runx2b	Uncut 3	25.38		9.37667	0.150433	0.149739	0.573024
		G2	Runx2b	Uncut 3	25.42		9.41667	0.146319
		G3	Runx2b	Uncut 3	25.36		9.35667	0.152533
		G4	Runx2b	6hpa 3	26.24		10.2733	0.0808013	0.085804
		G5	Runx2b	6hpa 3	26.16		10.1933	0.0854085
		G6	Runx2b	6hpa 3	26.06		10.0933	0.0915385
	4	E7	Ef1a	Uncut 4	16.58	16.31
		E8	Ef1a	Uncut 4	16.05
		E9	Ef1a	Uncut 4	16.3
		E10	Ef1a	6hpa 4	16.4	16.0433
		E11	Ef1a	6hpa 4	15.83
		E12	Ef1a	6hpa 4	15.9
		F7	Runx2a	Uncut 4	24.26		7.95	0.4044	0.388824	1.50177
		F8	Runx2a	Uncut 4	24.32		8.01	0.387927
		F9	Runx2a	Uncut 4	24.37		8.06	0.374713
		F10	Runx2a	6hpa 4	23.46		7.41667	0.585276	0.583925
		F11	Runx2a	6hpa 4	23.45		7.40667	0.589347
		F12	Runx2a	6hpa 4	23.48		7.43667	0.577219
		G7	Runx2b	Uncut 4	25.3		8.99	0.196671	0.198039	0.582367
		G8	Runx2b	Uncut 4	25.24		8.93	0.205023
		G9	Runx2b	Uncut 4	25.28		8.97	0.199416
		G10	Runx2b	6hpa 4	25.69		9.64667	0.124757	0.115331
		G11	Runx2b	6hpa 4	25.79		9.74667	0.116402
		G12	Runx2b	6hpa 4	25.93		9.88667	0.105637

## Sheet: Fig1E
Time-point analysed	Number of fish	Fin Cryosection Internal reference (File name)	Total osteoblast (Runx2+Bglap+) number	Total number of Runx2+Bglap+ PCNA+ osteoblasts	% of proliferating osteoblasts
uncut	Experiment #1	a1	26	0	0	Fig1E 0hpa Column
		b1	36	0	0
		c1	19	0	0
		d1	32	0	0
		e1	39	0	0
		f1	47	0	0
Time-point analysed	Number of fish	Fin Cryosection Internal reference (File name)	Total osteoblast (Runx2+Bglap+) number	Total number of Runx2+Bglap+ PCNA+ osteoblasts	% of proliferating osteoblasts
6hpa	Experiment #1	a1	35	1	2.85714	Fig1E 6hpa Column
		b1	44	2	4.54545
		c1	42	0	0
		e1	37	0	0
		f1	22	0	0
		g1	21	0	0
	Experiment #2	a1	33	0	0
		b1	40	0	0
		c1	35	0	0
		d1	29	0	0
Time-point analysed	Number of fish	Fin Cryosection Internal reference (File name)	Total osteoblast (Runx2+Bglap+) number	Total number of Runx2+Bglap+ PCNA+ osteoblasts	% of proliferating osteoblasts
12hpa	Experiment #1	a1	22	4	18.1818	Fig1E 12hpa Column
		b1	28	7	25
		c1	18	4	22.2222
		d1	17	1	5.88235
		e1	24	3	12.5
		f1	39	6	15.3846
	Experiment #2	a1	20	1	5
		b1	24	6	25
		c1	19	5	26.3158
		d1	31	9	29.0323
		e1	16	4	25
		g1	34	6	17.6471
Time-point analysed	Number of fish	Fin Cryosection Internal reference (File name)	Total osteoblast (Runx2+Bglap+) number	Total number of Runx2+Bglap+ PCNA+ osteoblasts	% of proliferating osteoblasts
18hpa	Experiment #1	a1	20	9	45	Fig1E 18hpa Column
		b1	24	8	33.3333
		c1	24	14	58.3333
		d1	31	11	35.4839
		f1	21	7	33.3333
	Experiment #2	a1	23	8	34.7826
		b1	20	12	60
		c1	30	20	66.6667
		d1	24	17	70.8333
Time-point analysed	Number of fish	Fin Cryosection Internal reference (File name)	Total osteoblast (Runx2+Bglap+) number	Total number of Runx2+Bglap+ PCNA+ osteoblasts	% of proliferating osteoblasts
24hpa	Experiment #1	a1	24	12	50	Fig1E 24hpa Column
		b1	29	24	82.7586
		c1	31	30	96.7742
		d1	37	29	78.3784
		e1	31	29	93.5484
		f1	41	36	87.8049
		g1	37	28	75.6757
	Experiment #2	a1	42	28	66.6667
		b1	41	27	65.8537
		c1	38	33	86.8421
		d1	50	37	74
		e1	38	32	84.2105
		f1	26	23	88.4615

## Sheet: Fig1H and I
						Fig1H 0hpa Column	Fig1I 0hpa Column
Time-point	Number of Fish	Fin Cryosection Internal reference (File name)	Fin area	Number of Runx2+Bglap+	Number of Runx2+Blglap-	Number of Runx2+Bglap+ cells per 100um2	Runx2+Bglap- cells per 100um2
0hpa	#1	uncut 40x zoom 0.6 a1	36633.6	30	2	8.18921	0.545947
		uncut 40x zoom 0.6 b1	40537.6	24	0	5.92043	0
		uncut 40x zoom 0.6 c1	31256.2	23	1	7.35853	0.319936
	#2	uncut 40x zoom 0.6 a1	19719.8	21	1	10.6492	0.507104
		uncut 40x zoom 0.6 b1	33805	24	3	7.09954	0.887442
		uncut 40x zoom 0.6 c1	25274.4	24	0	9.49577	0
	#3	uncut 40x zoom 0.6 a1	25438	13	0	5.11046	0
		uncut 40x zoom 0.6 b1	26841.1	16	1	5.96101	0.372563
		uncut 40x zoom 0.6 c1	21382.1	6	0	2.80608	0
	#4	uncut 40x zoom 0.6 a1	48566.3	13	0	2.67676	0
		uncut 40x zoom 0.6 b1	46920	16	0	3.41006	0
		uncut 40x zoom 0.6 c1	52187.8	13	4	2.491	0.766463
	#5	uncut 40x 0.8 zoom a1	34654	31	0	8.94558	0
		uncut 40x 0.8 zoom b1	36005	34	0	9.44313	0
		uncut 40x 0,8x a1	19155	22	0	11.4853	0
		uncut 40x 0,8x b1	21896	20	0	9.13409	0
		uncut 40x 0,8x d1	26349	19	0	7.2109	0
		uncut 40x 0,8x g1	27932	18	0	6.44422	0
		uncut 40x 0,8x e1	25363.7	18	2	7.09677	0.78853
		uncut 40x 0,8x a1	18937.4	22	4	11.6172	2.11223
		uncut 40x 0,8x b1	22631.5	16	2	7.0698	0.883725
		uncut 40x 0,8x c1	16078.8	21	0	13.0607	0
		uncut 40x 0,8x d1	26905.9	20	0	7.43331	0
		uncut 40x 0,8x f1	24189.7	15	1	6.20099	0.413399
		uncut 40x 0,8x g1	29386.3	19	0	6.4656	0
		uncut 40x 0.8 zoom a1	34393.7	32	2	9.30403	0.581502
		uncut 40x 0.8 zoom b1	36402.4	26	0	7.14239	0
						Fig1H 12hpa Column	Fig1I 12hpa Column
Time-point	Number of Fish	Fin Cryosection Internal reference (File name)	Fin area	Number of Runx2+Bglap+	Number of Runx2+Blglap-	Number of Runx2+Bglap+ cells per 100um2	Runx2+Bglap- cells per 100um2
12 hpa	#1	12hpa 40x 0.6 zoom c1	65908.3	35	20	5.31041	3.03452
		12hpa 40x 0.8 zoom a1	50267.7	23	16	4.5755	3.18296
		12hpa 40x 0.8 zoom b1	49107.5	15	7	3.05452	1.42544
		12hpa 40x 0.8 zoom d1	42141.8	12	8	2.84753	1.89835
	#2	12hpa 40x zoom 0.6 b1	45754.6	28	11	6.11961	2.40413
		12hpa 40x zoom 0.6 c1	45586.8	25	24	5.48405	5.26469
		12hpa 40x zoom 0.6 d1	43523.4	21	15	4.82499	3.44642
	#3	12hpa 40x zoom 0.6 a1	31562.4	21	15	6.65349	4.75249
		12hpa 40x zoom 0.6 b1	40145	21	18	5.23103	4.48374
		12hpa 40x zoom 0.6 c1	41759.4	20	6	4.78934	1.4368
	#4	12hpa 40x zoom 0.6 a1	46507.6	23	19	4.94543	4.08536
		12hpa 40x zoom 0.6 b1	46538.3	20	19	4.29753	4.08266
		12hpa 40x zoom 0.6 c1	52062	21	15	4.03365	2.88118
		12hpa 40x zoom 0.6 d1	52957.8	18	22	3.39893	4.15425
	#5	12hpa 40x zoom 0.6 a1	40187.9	30	15	7.46494	3.73247
		12hpa 40x zoom 0.6 b1	51964.7	29	20	5.58071	3.84876
		12hpa 40x zoom 0.6 c1	50972.8	21	19	4.11984	3.72748
		12hpa 40x zoom 0.6 d1	37603.2	22	9	5.85056	2.39341
	#6	12hpa 40x 0.8 zoom c1	43811	23	13	5.24982	2.96729
		12hpa 40x 0.8 zoom d1	39172	22	9	5.61626	2.29756
		12hpa 40x 0.8 zoom e1	37996	27	7	7.10601	1.8423
		12hpa 40x 0.6 zoom a1	61932.8	26	13	4.1981	2.09905
		12hpa 40x 0.6 zoom b1	58743.3	29	12	4.93674	2.04279
		12hpa 40x 0.6 zoom c1	61504.4	27	11	4.38993	1.78849
		12hpa 40x 0.8 zoom d1	39055.9	20	13	5.12087	3.32856
		12hpa 40x 0.8 zoom e1	40494.2	26	5	6.42067	1.23474
						Fig1H 24hpa Column	Fig1I 24hpa Column
Time-point	Number of Fish	Fin Cryosection Internal reference (File name)	Fin area	Number of Runx2+Bglap+	Number of Runx2+Blglap-	Number of Runx2+Bglap+ cells per 100um2	Runx2+Bglap- cells per 100um2
24 hpa	#1	24hpa 40x zoom 0.6 a1	38545	21	13	5.44818	3.37269
		24hpa 40x zoom 0.6 b1	45804.3	19	22	4.14808	4.80304
		24hpa 40x zoom 0.6 c1	44955.3	17	14	3.78153	3.1142
		24hpa 40x zoom 0.6 d1	50353.6	26	25	5.16348	4.96489
	#2	24hpa 40x zoom 0.6 a1	49189.3	29	31	5.89559	6.30218
		24hpa 40x zoom 0.6 1	33830.6	25	16	7.38975	4.72944
		24hpa 40x zoom 0.6 c1	45526.1	21	20	4.61274	4.39309
		24hpa 40x zoom 0.6 d1	50808.4	24	37	4.72363	7.28226
	#3	24hpa 40x zoom 0.6 b1	29713.5	22	13	7.40405	4.37512
		24hpa 40x zoom 0.6 c1	47438.9	23	14	4.84834	2.95117
		24hpa 40x zoom 0.6 d1	35590.6	24	18	6.74335	5.05752
	#4	24hpa 40x zoom 0.6 a1	36733.9	23	19	6.26125	5.17234
		24hpa 40x zoom 0.6 b1	35515.3	21	15	5.91294	4.22353
		24hpa 40x zoom 0.6 c1	34657.7	17	13	4.90511	3.75097
	#5	24hpa 40x 0.6 zoom a1	60000	32	22	5.33333	3.66667
		24hpa 40x 0.8 zoom c1	50664	33	31	6.5135	6.11874
		24hpa 40x 0.8 zoom d1	74029	30	25	4.05247	3.37705
		24hpa 40x 0.6 zoom a1	68961.4	26	18	3.77022	2.61016
		24hpa 40x 0.6 zoom b1	68672.5	32	27	4.6598	3.9317
		24hpa 40x 0.6 zoom c1	64354.1	34	37	5.28327	5.74944
