# Supplementary material for: A regeneration-triggered metabolic adaptation is necessary for cell identity transitions and cell cycle re-entry to support blastema formation and bone regeneration
Source: eLife. 2022 Aug 22;11:e76987. doi: 10.7554/eLife.76987 (PMC9395193; doi:10.7554/eLife.76987)
Supplement: Figure 2—figure supplement 2—source data 1. [file elife-76987-fig2-figsupp2-data1.xlsx]

## Sheet: Fig2 – Figure Supplement 2A
Biological Replicate	Gene name	Sample name	Cq Values	Average Cq values House keeping gene (ef1a)	dCq	Log2	geoMean	Relative Fold Change
1	ef1a	Uncut (0hpa) 1	16.65	16.41
	ef1a	Uncut (0hpa) 1	16.34							mtfr1					fis1
	ef1a	Uncut (0hpa) 1	16.24								Uncut (0hpa)	6 hpa	Fold Change			Uncut (0hpa)	6 hpa	Fold Change
	ef1a	6 hpa 1	15.54	15.5467						Biological Rep 1	0.053063	0.055959	1.05458		Biological Rep 1	0.156459	0.243815	1.55833
	ef1a	6 hpa 1	15.61							Biological Rep 2	0.065935	0.077331	1.17284		Biological Rep 2	0.183925	0.269905	1.46747
	ef1a	6 hpa 1	15.49							Biological Rep 3	0.060813	0.057533	0.946064		Biological Rep 3	0.155378	0.241014	1.55115
	mtfr1	Uncut (0hpa) 1	27.51		11.1	0.0455583	0.0530632	1.05458		Biological Rep 4	0.078229	0.072319	0.924453		Biological Rep 4	0.198956	0.313642	1.57644
	mtfr1	Uncut (0hpa) 1	27.42		11.01	0.0484908				Biological Rep 5	0.056741	0.097882	1.72507		Biological Rep 5	0.21822	0.33771	1.54757
	mtfr1	Uncut (0hpa) 1	26.94		10.53	0.0676323				Biological Rep 6	0.055317	0.084038	1.51921		Biological Rep 6	0.243252	0.403467	1.65864
	mtfr1	6 hpa 1	26.01		10.4633	0.0708309	0.0559593
	mtfr1	6 hpa 1	26.18		10.6333	0.0629575				drp1
	mtfr1	6 hpa 1	26.86		11.3133	0.0392959					Uncut (0hpa)	6 hpa	Fold Change
	ef1a	Uncut (0hpa) 1	16.1	16.1633						Biological Rep 1	0.280717	0.387031	1.37872
	ef1a	Uncut (0hpa) 1	16.05							Biological Rep 2	0.329235	0.357791	1.08673
	ef1a	Uncut (0hpa) 1	16.34							Biological Rep 3	0.387031	0.461325	1.19196
	ef1a	6 hpa 1	15.18	15.3433						Biological Rep 4	0.538564	0.390625	0.725308
	ef1a	6 hpa 1	15.3							Biological Rep 5	0.211763	0.50366	2.37841
	ef1a	6 hpa 1	15.55							Biological Rep 6	0.216713	0.391529	1.80667
	fis1	Uncut (0hpa) 1	25.56		9.39667	0.148362	0.156459	1.55833
	fis1	Uncut (0hpa) 1	25.38		9.21667	0.168076
	fis1	Uncut (0hpa) 1	25.51		9.34667	0.153594
	fis1	6 hpa 1	24.06		8.71667	0.237696	0.243815
	fis1	6 hpa 1	24.04		8.69667	0.241014
	fis1	6 hpa 1	23.97		8.62667	0.252997
	ef1a	Uncut (0hpa) 1	16.48	16.2933
	ef1a	Uncut (0hpa) 1	16.14
	ef1a	Uncut (0hpa) 1	16.26
	ef1a	6 hpa 1	15.61	15.7167
	ef1a	6 hpa 1	15.63
	ef1a	6 hpa 1	15.91
	Drp1	Uncut (0hpa) 1	24.74		8.44667	0.286616	0.280717	1.37872
	Drp1	Uncut (0hpa) 1	24.8		8.50667	0.27494
	Drp1	Uncut (0hpa) 1	24.77		8.47667	0.280717
	Drp1	6 hpa 1	24.15		8.43333	0.289277	0.387031
	Drp1	6 hpa 1	23.42		7.70333	0.479806
	Drp1	6 hpa 1	23.62		7.90333	0.417695
2	ef1a	Uncut (0hpa) 2	16.4	16.4433
	ef1a	Uncut (0hpa) 2	16.5
	ef1a	Uncut (0hpa) 2	16.43
	ef1a	6 hpa 2	15.65	15.5633
	ef1a	6 hpa 2	15.55
	ef1a	6 hpa 2	15.49
	mtfr1	Uncut (0hpa) 2	26.96		10.5167	0.0682603	0.0659351	1.17283
	mtfr1	Uncut (0hpa) 2	27.02		10.5767	0.0654796
	mtfr1	Uncut (0hpa) 2	27.05		10.6067	0.0641321
	mtfr1	6 hpa 2	25.77		10.2067	0.0846228	0.0773309
	mtfr1	6 hpa 2	25.49		9.92667	0.102749
	mtfr1	6 hpa 2	26.44		10.8767	0.053186
	ef1a	Uncut (0hpa) 1	16.13	16.13
	ef1a	Uncut (0hpa) 1	16.15
	ef1a	Uncut (0hpa) 1	16.11
	ef1a	6 hpa 1	16.11	16.2767
	ef1a	6 hpa 1	16.31
	ef1a	6 hpa 1	16.41
	fis1	Uncut (0hpa) 1	25.19		9.06	0.187356	0.183925	1.46747
	fis1	Uncut (0hpa) 1	25.28		9.15	0.176025
	fis1	Uncut (0hpa) 1	25.18		9.05	0.188659
	fis1	6 hpa 1	24.7		8.42333	0.291289	0.269905
	fis1	6 hpa 1	24.8		8.52333	0.271782
	fis1	6 hpa 1	24.93		8.65333	0.248363
	ef1a	Uncut (0hpa) 1	16.56	16.3933
	ef1a	Uncut (0hpa) 1	16.45
	ef1a	Uncut (0hpa) 1	16.17
	ef1a	6 hpa 1	15.26	15.37
	ef1a	6 hpa 1	15.49
	ef1a	6 hpa 1	15.36
	Drp1	Uncut (0hpa) 1	24.66		8.26667	0.324702	0.329235	1.08673
	Drp1	Uncut (0hpa) 1	24.66		8.26667	0.324702
	Drp1	Uncut (0hpa) 1	24.6		8.20667	0.338491
	Drp1	6 hpa 1	23.34		7.97	0.398833	0.357791
	Drp1	6 hpa 1	23.71		8.34	0.30861
	Drp1	6 hpa 1	23.44		8.07	0.372124
3	ef1a	Uncut (0hpa) 1	16.24	16.2733
	ef1a	Uncut (0hpa) 1	16.34
	ef1a	Uncut (0hpa) 1	16.24
	ef1a	6 hpa 1	16.03	16.05
	ef1a	6 hpa 1	16.06
	ef1a	6 hpa 1	16.06
	mtfr1	Uncut (0hpa) 1	27.04		10.7667	0.0573998	0.060813	0.946058
	mtfr1	Uncut (0hpa) 1	26.96		10.6867	0.0606726
	mtfr1	Uncut (0hpa) 1	26.87		10.5967	0.0645781
	mtfr1	6 hpa 1	26.42		10.37	0.0755647	0.0575326
	mtfr1	6 hpa 1	26.22		10.17	0.086801
	mtfr1	6 hpa 1	27.8		11.75	0.0290334
	ef1a	Uncut (0hpa) 1	16.4	16.1633
	ef1a	Uncut (0hpa) 1	15.83
	ef1a	Uncut (0hpa) 1	16.26
	ef1a	6 hpa 1	16	15.9633
	ef1a	6 hpa 1	15.94
	ef1a	6 hpa 1	15.95
	fis1	Uncut (0hpa) 1	26.39		10.2267	0.0834577	0.155378	1.55114
	fis1	Uncut (0hpa) 1	25.04		8.87667	0.212744
	fis1	Uncut (0hpa) 1	25.05		8.88667	0.211274
	fis1	6 hpa 1	24.67		8.70667	0.239349	0.241014
	fis1	6 hpa 1	24.72		8.75667	0.231196
	fis1	6 hpa 1	24.59		8.62667	0.252997
	ef1a	Uncut (0hpa) 1	16.66	16.38
	ef1a	Uncut (0hpa) 1	16.12
	ef1a	Uncut (0hpa) 1	16.36
	ef1a	6 hpa 1	16.34	16.2467
	ef1a	6 hpa 1	16.15
	ef1a	6 hpa 1	16.25
	Drp1	Uncut (0hpa) 1	24.27		7.89	0.421574	0.387031	1.19196
	Drp1	Uncut (0hpa) 1	24.4		8.02	0.385247
	Drp1	Uncut (0hpa) 1	24.51		8.13	0.356965
	Drp1	6 hpa 1	24.05		7.80333	0.447675	0.461325
	Drp1	6 hpa 1	24.05		7.80333	0.447675
	Drp1	6 hpa 1	23.92		7.67333	0.489888
4	ef1a	Uncut (0hpa) 1	16.23	16.2
	ef1a	Uncut (0hpa) 1	16.25
	ef1a	Uncut (0hpa) 1	16.12
	ef1a	6 hpa 1	15.32	15.37
	ef1a	6 hpa 1	15.34
	ef1a	6 hpa 1	15.45
	mtfr1	Uncut (0hpa) 1	26.28		10.08	0.0923884	0.0782295	0.92445
	mtfr1	Uncut (0hpa) 1	26.56		10.36	0.0760903
	mtfr1	Uncut (0hpa) 1	26.72		10.52	0.0681027
	mtfr1	6 hpa 1	25.48		10.11	0.0904871	0.0723192
	mtfr1	6 hpa 1	25.7		10.33	0.0776891
	mtfr1	6 hpa 1	26.23		10.86	0.053804
	ef1a	Uncut (0hpa) 1	16	15.9133
	ef1a	Uncut (0hpa) 1	15.71
	ef1a	Uncut (0hpa) 1	16.03
	ef1a	6 hpa 1	15.2	15.3867
	ef1a	6 hpa 1	15.19
	ef1a	6 hpa 1	15.77
	fis1	Uncut (0hpa) 1	24.75		8.83667	0.218725	0.198956	1.57644
	fis1	Uncut (0hpa) 1	24.77		8.85667	0.215714
	fis1	Uncut (0hpa) 1	25.14		9.22667	0.166915
	fis1	6 hpa 1	23.68		8.29333	0.318756	0.313642
	fis1	6 hpa 1	23.63		8.24333	0.329997
	fis1	6 hpa 1	23.8		8.41333	0.293315
	ef1a	Uncut (0hpa) 1	16.38	16.4067
	ef1a	Uncut (0hpa) 1	16.45
	ef1a	Uncut (0hpa) 1	16.39
	ef1a	6 hpa 1	15.71	15.6933
	ef1a	6 hpa 1	15.51
	ef1a	6 hpa 1	15.86
	Drp1	Uncut (0hpa) 1	23.98		7.57333	0.525049	0.538564	0.725309
	Drp1	Uncut (0hpa) 1	23.8		7.39333	0.594819
	Drp1	Uncut (0hpa) 1	24.05		7.64333	0.500181
	Drp1	6 hpa 1	23.56		7.86667	0.428447	0.390625
	Drp1	6 hpa 1	24.02		8.32667	0.311475
	Drp1	6 hpa 1	23.5		7.80667	0.446642
5	ef1a	Uncut (0hpa) 1	16.86	16.8633
	ef1a	Uncut (0hpa) 1	16.88
	ef1a	Uncut (0hpa) 1	16.85
	ef1a	6 hpa 1	15.79	15.84
	ef1a	6 hpa 1	15.88
	ef1a	6 hpa 1	15.85
	mtfr1	Uncut (0hpa) 1	27.54		10.6767	0.0610946	0.0567405	1.72508
	mtfr1	Uncut (0hpa) 1	27.71		10.8467	0.0543035
	mtfr1	Uncut (0hpa) 1	27.69		10.8267	0.0550616
	mtfr1	6 hpa 1	25.86		10.02	0.0963118	0.0978821
	mtfr1	6 hpa 1	25.81		9.97	0.0997082
	mtfr1	6 hpa 1	25.84		10	0.0976563
	ef1a	Uncut (0hpa) 1	16.38	16.5767
	ef1a	Uncut (0hpa) 1	16.81
	ef1a	Uncut (0hpa) 1	16.54
	ef1a	6 hpa 1	15.26	15.3233
	ef1a	6 hpa 1	15.33
	ef1a	6 hpa 1	15.38
	fis1	Uncut (0hpa) 1	25.59		9.01333	0.193516	0.21822	1.54756
	fis1	Uncut (0hpa) 1	25.12		8.54333	0.26804
	fis1	Uncut (0hpa) 1	25.54		8.96333	0.20034
	fis1	6 hpa 1	23.52		8.19667	0.340845	0.33771
	fis1	6 hpa 1	23.56		8.23667	0.331525
	fis1	6 hpa 1	23.52		8.19667	0.340845
	ef1a	Uncut (0hpa) 1	17.22	17.06
	ef1a	Uncut (0hpa) 1	16.99
	ef1a	Uncut (0hpa) 1	16.97
	ef1a	6 hpa 1	16.01	15.97
	ef1a	6 hpa 1	15.86
	ef1a	6 hpa 1	16.04
	Drp1	Uncut (0hpa) 1	25.87		8.81	0.222805	0.211763	2.37841
	Drp1	Uncut (0hpa) 1	26.13		9.07	0.186062
	Drp1	Uncut (0hpa) 1	25.83		8.77	0.229069
	Drp1	6 hpa 1	23.66		7.69	0.484261	0.50366
	Drp1	6 hpa 1	23.66		7.69	0.484261
	Drp1	6 hpa 1	23.49		7.52	0.544822
6	ef1a	Uncut (0hpa) 1	17.09	17.0733
	ef1a	Uncut (0hpa) 1	17.08
	ef1a	Uncut (0hpa) 1	17.05
	ef1a	6 hpa 1	16.18	16.2067
	ef1a	6 hpa 1	16.29
	ef1a	6 hpa 1	16.15
	mtfr1	Uncut (0hpa) 1	27.71		10.6367	0.0628122	0.0553166	1.51922
	mtfr1	Uncut (0hpa) 1	28.14		11.0667	0.0466231
	mtfr1	Uncut (0hpa) 1	27.83		10.7567	0.057799
	mtfr1	6 hpa 1	26.16		9.95333	0.100867	0.0840382
	mtfr1	6 hpa 1	26.36		10.1533	0.0878096
	mtfr1	6 hpa 1	26.75		10.5433	0.0670101
	ef1a	Uncut (0hpa) 1	16.29	16.31
	ef1a	Uncut (0hpa) 1	16.2
	ef1a	Uncut (0hpa) 1	16.44
	ef1a	6 hpa 1	15.3	15.59
	ef1a	6 hpa 1	15.66
	ef1a	6 hpa 1	15.81
	fis1	Uncut (0hpa) 1	24.6		8.29	0.319493	0.243252	1.65864
	fis1	Uncut (0hpa) 1	25.28		8.97	0.199416
	fis1	Uncut (0hpa) 1	25.1		8.79	0.225916
	fis1	6 hpa 1	24.12		8.53	0.270529	0.403467
	fis1	6 hpa 1	23.33		7.74	0.467765
	fis1	6 hpa 1	23.18		7.59	0.519018
	ef1a	Uncut (0hpa) 1	16.75	16.6967
	ef1a	Uncut (0hpa) 1	17
	ef1a	Uncut (0hpa) 1	16.34
	ef1a	6 hpa 1	15.27	15.5067
	ef1a	6 hpa 1	15.54
	ef1a	6 hpa 1	15.71
	Drp1	Uncut (0hpa) 1	25.56		8.86333	0.214719	0.216713	1.80667
	Drp1	Uncut (0hpa) 1	25.66		8.96333	0.20034
	Drp1	Uncut (0hpa) 1	25.42		8.72333	0.2366
	Drp1	6 hpa 1	23.48		7.97333	0.397912	0.391529
	Drp1	6 hpa 1	23.77		8.26333	0.325453
	Drp1	6 hpa 1	23.26		7.75333	0.463462

## Sheet: Fig2 – Figure Supplement 2B 
Biological Replicate	Gene name	Sample name	Cq Values	Average Cq values House keeping gene (ef1a)	dCq	Log2	geoMean	Relative Fold Change
1	ef1a	Uncut (0hpa) 1	22.64	22.5233
	ef1a	Uncut (0hpa) 1	22.5
	ef1a	Uncut (0hpa) 1	22.43							drp1					fis1
	ef1a	Uncut (0hpa) 1	21.97	21.75							Uncut (0hpa)	24hpa	Fold Change			Uncut (0hpa)	24hpa	Fold Change
	ef1a	Uncut (0hpa) 1	21.62							Biological Rep 1	0.55627	0.618648	1.11214		Biological Rep 1	0.718897	0.820091	1.14076
	ef1a	Uncut (0hpa) 1	21.66							Biological Rep 2	0.399755	0.551152	1.37872		Biological Rep 2	0.797666	0.578554	0.725309
	mtfr1	24 hpa 1	32.42		9.89667	0.104907	0.162351	1.10191		Biological Rep 3	0.483143	0.558846	1.15669		Biological Rep 3	0.885066	0.818199	0.92445
	mtfr1	24 hpa 1	31.53		9.00667	0.194412				Biological Rep 4	0.298098	0.519018	1.7411		Biological Rep 4	0.803214	0.63604	0.791869
	mtfr1	24 hpa 1	31.42		8.89667	0.209815
	mtfr1	24 hpa 1	30.48		8.73	0.235509	0.178896
	mtfr1	24 hpa 1	31.4		9.65	0.124469				mtfr1
	mtfr1	24 hpa 1	30.75		9	0.195312					Uncut (0hpa)	24hpa	Fold Change
	fis1	24 hpa 1	29.57		7.04667	0.756383	0.718897	1.14076		Biological Rep 1	0.162351	0.178896	1.10191
	fis1	24 hpa 1	29.63		7.10667	0.725571				Biological Rep 2	0.209331	0.17766	0.848704
	fis1	24 hpa 1	29.73		7.20667	0.676982				Biological Rep 3	0.092816	0.169246	1.82346
	fis1	24 hpa 1	28.46		6.71	0.955188	0.820091			Biological Rep 4	0.167689	0.133402	0.795532
	fis1	24 hpa 1	28.65		6.9	0.837323
	fis1	24 hpa 1	28.93		7.18	0.689612
	Ef1a	Uncut (0hpa) 1	17.15	17.07
	Ef1a	Uncut (0hpa) 1	16.99
	Ef1a	Uncut (0hpa) 1	17.07
	Ef1a	Uncut (0hpa) 1	16.83	16.8
	Ef1a	Uncut (0hpa) 1	16.7
	Ef1a	Uncut (0hpa) 1	16.87
	Drp1	24 hpa 1	24.37		7.3	0.634572	0.55627	1.11214
	Drp1	24 hpa 1	24.64		7.57	0.526263
	Drp1	24 hpa 1	24.67		7.6	0.515433
	Drp1	24 hpa 1	24.16		7.36	0.608722	0.618648
	Drp1	24 hpa 1	24.12		7.32	0.625836
	Drp1	24 hpa 1	24.13		7.33	0.621513
2	ef1a	Uncut (0hpa) 1	22.67	22.6967
	ef1a	Uncut (0hpa) 1	22.68
	ef1a	Uncut (0hpa) 1	22.74
	ef1a	Uncut (0hpa) 1	21.39	21.3267
	ef1a	Uncut (0hpa) 1	21.29
	ef1a	Uncut (0hpa) 1	21.3
	mtfr1	24 hpa 1	31.46		8.76333	0.23013	0.209331	0.848704
	mtfr1	24 hpa 1	31.52		8.82333	0.220756
	mtfr1	24 hpa 1	31.81		9.11333	0.180557
	mtfr1	24 hpa 1	30.45		9.12333	0.179309	0.17766
	mtfr1	24 hpa 1	30.51		9.18333	0.172005
	mtfr1	24 hpa 1	30.43		9.10333	0.181812
	fis1	24 hpa 1	29.87		7.17333	0.692806	0.797666	0.725309
	fis1	24 hpa 1	29.48		6.78333	0.907848
	fis1	24 hpa 1	29.65		6.95333	0.806934
	fis1	24 hpa 1	28.49		7.16333	0.697625	0.578554
	fis1	24 hpa 1	28.58		7.25333	0.655434
	fis1	24 hpa 1	29.21		7.88333	0.423526
	Ef1a	Uncut (0hpa) 1	16.98	17.0967
	Ef1a	Uncut (0hpa) 1	17.01
	Ef1a	Uncut (0hpa) 1	17.3
	Ef1a	Uncut (0hpa) 1	16.41	16.51
	Ef1a	Uncut (0hpa) 1	16.43
	Ef1a	Uncut (0hpa) 1	16.69
	Drp1	24 hpa 1	25.07		7.97333	0.397912	0.399755	1.37872
	Drp1	24 hpa 1	25.12		8.02333	0.384358
	Drp1	24 hpa 1	25		7.90333	0.417695
	Drp1	24 hpa 1	23.89		7.38	0.600342	0.551152
	Drp1	24 hpa 1	23.9		7.39	0.596195
	Drp1	24 hpa 1	24.25		7.74	0.467765
3	ef1a	Uncut (0hpa) 1	22.54	22.45
	ef1a	Uncut (0hpa) 1	22.25
	ef1a	Uncut (0hpa) 1	22.56
	ef1a	Uncut (0hpa) 1	21.77	21.8267
	ef1a	Uncut (0hpa) 1	22.02
	ef1a	Uncut (0hpa) 1	21.69
	mtfr1	24 hpa 1	32.54		10.09	0.0917503	0.0928164	1.82344
	mtfr1	24 hpa 1	32.17		9.72	0.118574
	mtfr1	24 hpa 1	32.86		10.41	0.0734984
	mtfr1	24 hpa 1	31.63		9.80333	0.111919	0.169246
	mtfr1	24 hpa 1	30.93		9.10333	0.181812
	mtfr1	24 hpa 1	30.54		8.71333	0.238246
	fis1	24 hpa 1	29.07		6.62	1.01667	0.885066	0.92445
	fis1	24 hpa 1	29.2		6.75	0.929068
	fis1	24 hpa 1	29.54		7.09	0.734002
	fis1	24 hpa 1	28.54		6.71333	0.952983	0.818199
	fis1	24 hpa 1	28.67		6.84333	0.870866
	fis1	24 hpa 1	29.07		7.24333	0.659993
	Ef1a	Uncut (0hpa) 1	16.86	16.9333
	Ef1a	Uncut (0hpa) 1	16.92
	Ef1a	Uncut (0hpa) 1	17.02
	Ef1a	Uncut (0hpa) 1	16.45	16.5133
	Ef1a	Uncut (0hpa) 1	16.45
	Ef1a	Uncut (0hpa) 1	16.64
	Drp1	24 hpa 1	24.71		7.77667	0.456026	0.483143	1.15669
	Drp1	24 hpa 1	24.55		7.61667	0.509513
	Drp1	24 hpa 1	24.62		7.68667	0.485381
	Drp1	24 hpa 1	24.07		7.55667	0.531149	0.558846
	Drp1	24 hpa 1	23.87		7.35667	0.61013
	Drp1	24 hpa 1	24.05		7.53667	0.538564
4	ef1a	Uncut (0hpa) 1	22.65	22.4567
	ef1a	Uncut (0hpa) 1	22.31
	ef1a	Uncut (0hpa) 1	22.41
	ef1a	Uncut (0hpa) 1	21.76	21.5333
	ef1a	Uncut (0hpa) 1	21.31
	ef1a	Uncut (0hpa) 1	21.53
	mtfr1	24 hpa 1	32.18		9.72333	0.1183	0.167689	0.795536
	mtfr1	24 hpa 1	31.26		8.80333	0.223837
	mtfr1	24 hpa 1	31.59		9.13333	0.178071
	mtfr1	24 hpa 1	30.93		9.39667	0.148362	0.133402
	mtfr1	24 hpa 1	31.35		9.81667	0.110889
	mtfr1	24 hpa 1	30.97		9.43667	0.144305
	fis1	24 hpa 1	29.36		6.90333	0.835391	0.803214	0.791869
	fis1	24 hpa 1	29.48		7.02333	0.768716
	fis1	24 hpa 1	29.41		6.95333	0.806934
	fis1	24 hpa 1	28.91		7.37667	0.601731	0.63604
	fis1	24 hpa 1	28.89		7.35667	0.61013
	fis1	24 hpa 1	28.69		7.15667	0.700856
	Ef1a	Uncut (0hpa) 1	16.96	17.01
	Ef1a	Uncut (0hpa) 1	17.06
	Ef1a	Uncut (0hpa) 1	17.01
	Ef1a	Uncut (0hpa) 1	16.53	16.5833
	Ef1a	Uncut (0hpa) 1	16.68
	Ef1a	Uncut (0hpa) 1	16.54
	Drp1	24 hpa 1	25.58		8.57	0.263132	0.298098	1.7411
	Drp1	24 hpa 1	25.17		8.16	0.349619
	Drp1	24 hpa 1	25.45		8.44	0.287943
	Drp1	24 hpa 1	24.05		7.46667	0.56534	0.519018
	Drp1	24 hpa 1	24.3		7.71667	0.475392
	Drp1	24 hpa 1	24.17		7.58667	0.520218

## Sheet: Fig2 – Figure Supplement 2I 
0 hpa
				Sup Fig2J 0 hpa Column
Number of fish	Fin Cryosection Internal reference (File name)	Nº Mitochondria	Nº Cells	Nº Mitoc/Nº Cells
P1	P1 a1	9700	591	16.4129
	P1 b1	9491	339	27.9971
	P1 c1	10588	513	20.6394
P2	P2 a1	8500	494	17.2065
	P2 b1	6467	390	16.5821
P3	P3 a1	5339	246	21.7033
	P3 b1	5279	252	20.9484
	P3 c1	5974	274	21.8029
P4	P4 a1	8545	252	33.9087
	P4 b1	5571	240	23.2125
	P4 c1	9409	340	27.6735
P5	P5 a1	3605	151	23.8742
	P5 b1	5571	171	32.5789
	P5 c1	4199	158	26.5759
6 hpa
				Sup Fig2J 6 hpa Column
Number of fish	Fin Cryosection Internal reference (File name)	Nº Mitochondria	Nº Cells	Nº Mitoc/Nº Cells
P1	P1 a1	6816	485	14.0536
	P1 b1	17922	585	30.6359
	P1 c1	17145	598	28.6706
P2	P2 a1	6293	264	23.8371
	P2 b1	6189	281	22.0249
	P2 c1	4206	219	19.2055
P3	P3 a1	7901	261	30.272
	P3 b1	5397	199	27.1206
P4	P4 a1	12910	312	41.3782
	P4 b1	12312	252	48.8571
	P4 c1	10331	169	61.1302
P5	P5 a1	4353	163	26.7055
	P5 b1	6447	191	33.7539
	P5 c1	3694	148	24.9595
24 hpa
				Sup Fig2J 24 hpa Column
Number of fish	Fin Cryosection Internal reference (File name)	Nº Mitochondria	Nº Cells	Nº Mitoc/Nº Cells
P1	P1 a1	27907	1052	26.5276
	P1 b1	7438	317	23.4637
	P1 c1	15329	398	38.5151
P2	P2 a1	5803	276	21.0254
	P2 b1	5489	237	23.1603
	P2 c1	5458	254	21.4882
P3	P3 a1	6091	166	36.6928
	P3 b1	7202	236	30.5169
	P3 c1	7847	238	32.9706
P4	P4 a1	9432	190	49.6421
	P4 b1	6937	176	39.4148
	P4 c1	8166	271	30.1328
P5	P5 a1	10176	299	34.0334
	P5 b1	6183	173	35.7399

## Sheet: Fig2 – Figure Supplement 2J
0 hpa																																												6 hpa
P1									P2													P3									P4													P1
a				b					a				b				c					a				b					a				b				c					a				b
Volumes (μm3)	Volume intervals	Frequencies	%	Volumes (μm3)	Volume intervals	Frequencies	%		Volumes (μm3)	Volume intervals	Frequencies	%	Volumes (μm3)	Volume intervals	Frequencies	%	Volumes (μm3)	Volume intervals	Frequencies	%		Volumes (μm3)	Volume intervals	Frequencies	%	Volumes (μm3)	Volume intervals	Frequencies	%		Volumes (μm3)	Volume intervals	Frequencies	%	Volumes (μm3)	Volume intervals	Frequencies	%	Volumes (μm3)	Volume intervals	Frequencies	%		Volumes (μm3)	Volume intervals	Frequencies	%	Volumes (μm3)	Volume intervals
0.609873	0.1	433	5.09412	3.65171	0.1	445	6.88109		0.0306598	0.1	53	0.546392	0.00830735	0.1	1263	13.3073	0.00907439	0.1	700	6.61126		3.00703	0.1	213	4.03486	0.646507	0.1	305	5.10546		0.216382	0.1	552	6.45992	0.0124449	0.1	385	6.91079	0.212319	0.1	651	6.91891		2.08354e-07	0.1	852	12.5	0.00851147	0.1
0.42436	1	2556	30.0706	1.22384	1	2344	36.2456		0.0361518	1	2859	29.4742	0.00856116	1	3148	33.1683	0.00958522	1	3074	29.0329		1.24434	1	2570	48.6835	1.32932	1	3018	50.5189		0.307228	1	3830	44.8215	0.378344	1	2211	39.6877	0.419559	1	4334	46.0623		3.55265e-06	1	2549	37.3973	0.00857681	1
2.62756	10	5389	63.4	0.217408	10	3635	56.2084		0.0447355	10	6547	67.4948	0.00863257	10	4896	51.5857	0.00963612	10	6666	62.9581		0.555539	10	2488	47.1301	0.689501	10	2639	44.1748		1.6923	10	4144	48.4962	0.472673	10	2951	52.9707	4.0283	10	4391	46.6681		0.000130138	10	3354	49.2077	0.00863314	10
2.38769	100	122	1.43529	0.919487	100	43	0.664914		0.0448851	100	241	2.48454	0.00869882	100	184	1.93868	0.00967934	100	148	1.39781		4.84933	100	8	0.151544	0.671144	100	12	0.20087		0.520006	100	19	0.222352	1.01912	100	24	0.430802	1.48759	100	33	0.350728		0.000175176	100	61	0.894953	0.00871327	100
8.87039				2.12844					0.0455765				0.00873916				0.00969571					1.8004				0.922227					0.593172				1.126				4.03966					0.000186657				0.00882594
5.37304				0.787478					0.04996				0.00882806				0.00969794					0.611804				0.48252					0.747904				4.68604				0.261601					0.000195384				0.00909146
6.75744				1.52002					0.0560835				0.0088608				0.00971117					0.0111701				0.881023					0.40909				0.445259				0.617181					0.000229409				0.0091115
0.437711				0.98703					0.0591305				0.00886495				0.00973397					0.302952				5.8541					0.263739				0.874097				0.010935					0.000397838				0.0091792
2.4009				0.536361					0.065342				0.00890047				0.00975202					0.0111341				0.423374					2.29524				1.29113				1.25084					0.000413549				0.00926855
0.012445				0.180886					0.0666058				0.00891628				0.00978228					3.66748				3.98768					1.44199				2.68358				5.98281					0.000459667				0.00928019
1.12045				3.45873					0.0670448				0.0090048				0.00980663					1.55273				0.607555					1.71556				2.7813				1.25224					0.000697641				0.00935682
0.010292				0.239067					0.0681126				0.00903442				0.00983099					0.474033				3.41331					0.0107178				0.0124449				2.55005					0.000944347				0.00942705
0.506885				1.0545					0.0688325				0.00921743				0.00985106					0.0124459				0.72158					0.600922				0.0111161				0.142894					0.00104809				0.00945299
1.96722				0.800438					0.0703157				0.00923742				0.0098582					1.22712				2.43826					0.486382				1.04543				0.361672					0.00136665				0.00945817
8.9199				0.986673					0.0707435				0.00925569				0.00986407					1.51965				0.276978					0.950201				0.011871				3.99733					0.00139568				0.00946357
2.30725				1.23161					0.0720474				0.00926302				0.00986498					0.217771				0.30855					1.45145				0.471669				2.32372					0.00149681				0.00950134
1.64384				5.43591					0.0726682				0.00934867				0.00987116					0.290462				2.04628					0.292968				0.0124449				2.24413					0.00156973				0.00952999
0.544796				1.01534					0.07773				0.00936226				0.0099547					1.64898				0.91647					0.491233				0.0970862				1.0394					0.00187331				0.00953463
2.84568				0.484522					0.0789228				0.00939383				0.0100006					1.19814				3.56158					0.0113951				8.36391				1.49815					0.00189058				0.00955318
5.54188				0.526885					0.0802579				0.00942298				0.0100195					1.80074				0.258972					3.79227				1.93924				1.1475					0.00206232				0.00956624
1.47799				1.08488					0.0806318				0.00943631				0.0100225					1.88054				4.03444					0.704189				1.50019				0.818062					0.00207516				0.00957166
0.69522				3.26345					0.0806425				0.00944968				0.0100225					1.41658				6.99284					0.827201				0.0110716				1.72948					0.00262668				0.00961123
1.25996				0.40673					0.0828203				0.00951356				0.0100294					0.0111346				2.6802					1.0695				2.92742				1.375					0.00273488				0.00961725
2.68804				4.86252					0.0835815				0.00954574				0.0100766					0.954788				0.874536					1.87581				1.27433				0.309268					0.00278782				0.00962142
1.90529				1.89893					0.0836839				0.00955268				0.0100947					0.540855				0.959161					3.61916				0.0124449				2.90968					0.00290846				0.00962653
2.35757				0.949995					0.0845673				0.00955391				0.0101335					3.60674				3.08081					0.607915				0.153186				1.88347					0.00299478				0.00965752
0.0124452				5.17384					0.0851144				0.00956338				0.0101442					1.22449				1.11458					0.424944				2.19921				0.203488					0.00321874				0.00967474
1.75186				0.25639					0.0862163				0.00956375				0.0101532					2.26361				3.02626					2.23274				2.52936				0.583912					0.00328435				0.00968586
2.28434				0.199036					0.0865681				0.00957618				0.0101617					3.59609				1.60857					2.57779				0.0124459				0.764212					0.00337648				0.00973112
1.15869				0.100374					0.0867853				0.00961707				0.0101661					2.06168				0.0103656					0.819258				1.12383				0.0906128					0.00347928				0.00976786
5.41591				1.1754					0.0869036				0.00961919				0.0101785					8.11822				4.11841					2.819				0.595169				0.993351					0.00418349				0.0097789
1.47265				1.30992					0.0873982				0.00962019				0.0101898					0.184255				3.9925					0.396431				2.88584				0.435718					0.00422144				0.00978396
1.16056				0.572585					0.0873994				0.00964826				0.0102132					0.836065				1.0709					3.65224				1.11845				1.46262					0.00502222				0.00979841
4.96688				0.490422					0.0882508				0.00965633				0.0102726					0.869393				4.35296					3.10871				1.65229				1.32117					0.00504267				0.00982001
3.29081				0.334831					0.0885615				0.009708				0.0102869					0.495985				0.696119					2.35611				1.40739				3.75104					0.00526187				0.0098349
0.940237				0.0941839					0.0897708				0.00971628				0.0102938					0.979493				0.0120657					0.313591				0.439495				1.22411					0.00569878				0.00984516
0.0124452				0.141691					0.0907288				0.00972387				0.010294					0.372156				3.72844					1.26728				0.921108				1.59295					0.0059835				0.00984649
0.971642				0.278778					0.0911044				0.00973142				0.0102983					1.19312				0.740547					0.609823				0.0118265				1.994					0.00607757				0.00985166
1.29401				2.89723					0.0913305				0.00975272				0.0103155					1.83552				3.23676					1.2882				0.568108				3.87398					0.00675649				0.00986259
5.553				2.33848					0.0923104				0.00975506				0.0103179					2.41298				0.970578					0.453573				0.975998				0.0124452					0.00677497				0.00987085
1.53925				0.783184					0.09328				0.00976141				0.0103188					0.0123207				3.56086					1.32129				0.134482				0.794656					0.00679359				0.00988526
2.7858				0.126676					0.0936823				0.00976375				0.0103292					0.107914				4.42475					0.317223				1.04048				0.0124459					0.00721713				0.00993025
3.57381				2.57074					0.0938716				0.00978424				0.0103314					3.61414				2.7019					3.25414				0.886591				0.0124452					0.00722758				0.00993603
0.928476				1.90308					0.0941483				0.00979493				0.0103427					0.810711				5.12262					0.844285				0.335997				2.7433					0.00722795				0.00993725
4.15678				0.0728898					0.0943177				0.00982459				0.0103489					8.17928				0.0119295					0.970851				0.785811				2.76464					0.00730699				0.00994052
0.0124452				0.448518					0.0947796				0.00985985				0.0103527					0.785007				0.0124449					0.39102				1.47299				3.8663					0.00732483				0.00994513
1.3815				0.290979					0.0949071				0.00986489				0.0103624					0.242655				0.0124449					2.35013				0.527894				0.389389					0.00739847				0.00994576
10.5416				0.528913					0.0984137				0.00991045				0.0103708					1.07632				1.15498					1.33879				0.820146				0.968741					0.0074403				0.00994884
1.38274				1.68164					0.0985703				0.00991296				0.0103844					1.16195				0.622071					3.42441				1.23095				0.403709					0.00766009				0.00998626
4.21528				5.41109					0.0987664				0.00991957				0.0103847					6.44526				4.57377					1.47273				2.04916				0.634616					0.00772518				0.00999018
5.05691				3.5374					0.0993935				0.00994321				0.0103862					3.57074				0.522091					0.0117873				1.0822				0.153755					0.00794458				0.00999129
2.41954				0.421652					0.0995004				0.0100001				0.0104003					2.96806				0.687105					1.17799				0.234964				0.753757					0.00805192				0.0100246
1.78733				5.31229					0.0998059				0.0100047				0.0104009					1.78245				0.802522					5.66403				0.643951				3.54454					0.00811758				0.0100261
5.97411				2.26751					0.100198				0.0100152				0.0104122					1.82095				7.3654					2.79675				0.349331				1.61999					0.00837235				0.0100316
2.5408				1.81214					0.100416				0.0100201				0.010425					0.0918282				2.06049					1.61995				1.87166				0.956638					0.00843788				0.0100648
5.67011				0.664143					0.100587				0.0100347				0.0104424					0.316871				1.27393					0.975174				1.57811				0.727968					0.00854315				0.0100677
6.23523				2.21094					0.100655				0.0100436				0.0104501					0.735754				0.0124449					0.688205				0.587925				0.829072					0.0086136				0.0100763
1.24432				0.961758					0.101361				0.0100507				0.010453					1.32186				1.12566					1.58629				0.00950214				1.38921					0.00863862				0.0100857
0.0720125				0.710481					0.102092				0.0100523				0.0104588					0.869109				1.3617					1.94257				2.40239				1.443					0.0087028				0.0101078
1.16674				0.576994					0.102166				0.0100775				0.0105004					1.92725				2.09882					1.57544				0.285453				2.70467					0.0087719				0.010115
1.8203				0.37395					0.102666				0.0100946				0.0105019					1.37196				2.22338					1.82568				1.80081				1.8747					0.00878082				0.0101193
0.338812				1.61784					0.102893				0.0101104				0.0105234					1.21538				0.636342					4.59415				0.67656				0.415031					0.00883724				0.0101368
3.17849				0.154352					0.103104				0.0101525				0.0105266					0.0124449				2.00378					0.65235				3.18128				0.451713					0.00884204				0.010138
4.49679				0.844565					0.103493				0.0101647				0.010536					2.9881				4.42495					1.00527				1.69494				3.22884					0.00891097				0.0101438
1.16313				0.0104139					0.104914				0.0101801				0.0105379					0.393173				0.543978					0.821737				1.58798				0.0124452					0.00891406				0.0101502
4.0151				6.25516					0.105183				0.0101942				0.0105419					2.8266				1.15333					4.97218				0.61959				1.75003					0.00892083				0.010158
0.906623				1.85655					0.105438				0.0101963				0.0105451					0.949688				2.28505					2.32756				0.411884				2.67741					0.00892358				0.0101668
2.72919				0.0092711					0.107172				0.0101987				0.0105455					4.34501				1.26606					0.753978				1.70306				0.703776					0.00900675				0.0101691
0.790654				0.959379					0.107958				0.0102262				0.0105466					3.58559				1.36323					0.852285				6.85129				2.43851					0.0090487				0.0101776
0.444046				3.41431					0.107987				0.0102309				0.0105635					2.72507				2.08559					0.200029				0.720178				0.0124452					0.00905176				0.0101847
0.274357				1.1277					0.108954				0.0102977				0.0105747					2.78609				0.613842					2.61547				2.80295				0.00762087					0.00905985				0.0101986
6.5314				1.52325					0.109099				0.0102988				0.0105759					0.435492				2.04523					1.09159				0.477629				2.17969					0.00907071				0.0101994
0.925326				1.45591					0.109109				0.0102993				0.0105817					0.0124459				0.0124469					0.718068				0.758159				0.38323					0.00910268				0.0102025
2.45095				4.5588					0.109205				0.0103001				0.0105938					0.45585				0.139021					2.25277				0.282708				5.39619					0.0091131				0.0102042
0.484319				0.39367					0.111065				0.0103008				0.0106047					1.05792				1.27186					3.9667				0.498199				1.0737					0.00916412				0.0102236
1.05582				3.38189					0.111169				0.0103104				0.0106177					0.254548				1.01916					0.48724				0.74539				1.27409					0.00918901				0.0102361
2.74461				6.14123					0.111617				0.0103265				0.0106185					0.574				2.09661					0.976276				1.7884				0.421058					0.00921367				0.010259
0.281384				4.15141					0.113721				0.010338				0.0106201					0.731105				0.047836					1.65554				1.08207				0.954933					0.00930594				0.0102856
1.07714				0.415479					0.113903				0.0103393				0.0106938					0.690056				0.749643					0.0109244				1.70272				0.250852					0.00932973				0.0102917
2.85095				2.66396					0.114372				0.0103484				0.0107146					0.576429				1.29366					7.99613				0.0124459				1.04754					0.00938153				0.0103014
0.987139				1.77087					0.115188				0.0103645				0.0107282					1.63764				0.679604					0.298214				3.76604				2.16038					0.00949169				0.0103111
8.51657				2.02542					0.116309				0.0103651				0.0107379					1.36148				1.74133					3.01732				0.15919				3.15152					0.00953042				0.0103172
0.748378				0.0109311					0.116616				0.010373				0.0107457					1.54409				2.16796					2.17017				0.926525				0.738688					0.0095354				0.0103218
5.29962				0.688129					0.117304				0.0103796				0.0107486					0.945846				3.18178					4.39522				0.687788				2.23528					0.00959289				0.0103245
0.435109				1.27282					0.119301				0.0103815				0.0107537					0.538119				0.866333					1.79625				3.95878				1.37451					0.00959852				0.0103321
0.714449				0.623437					0.119386				0.0103925				0.0107649					0.365848				1.35884					0.517365				1.26244				0.0859535					0.00964276				0.0103483
0.86392				0.390793					0.120221				0.0103979				0.0107896					1.93107				5.09248					0.759797				0.495997				1.63349					0.00966074				0.0103586
0.915149				0.670426					0.121045				0.0104156				0.0108162					0.435723				0.939592					0.969255				0.549403				1.23139					0.00967672				0.010371
0.652394				0.59465					0.122667				0.0104358				0.0108196					7.62705				0.186278					0.601922				0.854679				1.4846					0.00970692				0.0103716
3.20282				0.532818					0.125609				0.0104512				0.0108247					10.7885				0.554373					1.22392				0.011525				0.221078					0.00973713				0.0103753
1.27489				0.0705708					0.125892				0.0104526				0.0108377					6.76415				0.793575					0.0124092				0.372001				0.112422					0.00974544				0.0103975
1.45702				1.65669					0.126143				0.0104603				0.010839					2.96992				6.05331					0.228085				1.98704				4.48384					0.00978601				0.010403
2.50732				0.902076					0.128502				0.0104629				0.0108394					7.57162				1.00509					0.0124449				3.46503				0.19397					0.00979699				0.010408
0.397039				0.817653					0.128807				0.010463				0.0108544					0.0124459				1.66918					0.628784				0.191764				2.97085					0.00985987				0.0104185
0.634124				0.243675					0.129179				0.0104764				0.0108569					1.83213				1.21137					2.5576				0.489592				1.0931					0.009862				0.0104274
0.875821				1.6644					0.129393				0.0104859				0.0108943					1.22311				0.622933					0.566865				0.561298				0.748743					0.0099195				0.0104287
2.52069				0.0124459					0.129917				0.0104888				0.0109163					0.0117599				1.66228					0.861036				0.431996				0.0666078					0.00992505				0.0104435
2.38065				1.90389					0.130028				0.0104902				0.0109188					0.0116457				1.60276					0.614549				0.0124449				0.760033					0.00994906				0.0104525
0.911855				0.298495					0.130255				0.0104992				0.0109229					2.19135				0.454635					1.14733				1.49873				1.50089					0.00999739				0.0104568
2.96211				1.24413					0.130372				0.0105071				0.0109274					0.0124449				0.641021					1.79342				0.160993				1.07796					0.0100221				0.0104719
0.338444				1.54265					0.130825				0.010514				0.0109313					1.19709				5.83024					0.012019				0.0122207				0.0623227					0.0100351				0.0104767
0.821232				1.04216					0.131124				0.0105179				0.0109349					3.54347				0.120135					1.80927				1.06942				0.624491					0.0100575				0.0104791
1.86829				0.185427					0.131173				0.0105349				0.0109365					1.61577				1.67677					0.0121417				1.61654				0.587883					0.0100579				0.0104839
0.942507				0.430144					0.131767				0.0105389				0.0109404					0.825192				0.784954					3.58135				1.19156				0.732837					0.0100816				0.0104855
1.6437				0.621198					0.132412				0.0105437				0.0109581					2.23649				3.66405					3.43966				1.02644				0.455569					0.0100874				0.0104921
2.37393				0.786807					0.132541				0.0105463				0.0109595					2.06082				2.2592					0.207086				1.05454				0.472092					0.010097				0.0104999
3.62302				2.51932					0.13257				0.0105524				0.0109636					5.21363				1.29572					0.615218				0.235723				5.28223					0.0101086				0.0105014
0.551656				0.601604					0.133302				0.0105547				0.0109726					0.622493				1.81533					5.30095				2.98595				0.145951					0.0101109				0.0105119
9.8889				0.0121124					0.133686				0.0105597				0.0109795					0.605551				4.34849					0.711422				2.97482				0.854952					0.0101239				0.0105136
6.18446				7.37595					0.135047				0.0105603				0.0109802					1.31204				1.4928					0.18801				2.79825				0.255905					0.0101573				0.0105193
2.91376				1.20786					0.135418				0.0105661				0.0109806					2.083				1.15812					3.86553				0.0103577				1.05656					0.0101574				0.0105213
1.83004				0.773262					0.135638				0.0105678				0.0109927					1.33845				0.979353					1.41053				2.41333				7.41249					0.0101761				0.0105242
20.6123				2.06339					0.135855				0.0105705				0.0110073					1.91254				0.0102941					0.568622				3.35036				0.0124452					0.0101767				0.010528
4.15052				2.0615					0.13614				0.0105718				0.0110267					1.57197				0.55433					1.05668				2.67294				0.16684					0.0101775				0.0105413
0.0117407				0.0123957					0.136212				0.0105739				0.0110281					1.934				0.503094					2.77472				1.57907				1.51252					0.0101845				0.0105486
1.10825				0.0884478					0.136446				0.0105774				0.0110318					2.02597				3.03333					1.15674				0.330328				0.027611					0.0101853				0.0105486
1.22785				1.01112					0.136482				0.0105832				0.0110409					0.769281				1.02859					2.26219				0.660527				0.624123					0.0102112				0.0105512
0.544561				2.9215					0.136522				0.0105883				0.0110514					4.09104				1.86424					2.31248				0.188816				1.18053					0.0102592				0.0105549
6.12046				2.64802					0.136605				0.0105884				0.0110548					0.643725				7.05012					0.433737				0.537784				1.07865					0.0102674				0.0105798
0.276833				1.99567					0.13668				0.0106035				0.0110559					4.2476				1.91168					0.532449				0.0114953				0.503561					0.0102917				0.0105866
0.891709				1.51582					0.138084				0.0106045				0.0110921					3.4969				9.03255					1.20141				0.0670183				0.252982					0.0103199				0.0105919
1.12802				0.278547					0.138645				0.0106051				0.0110951					3.02023				3.34143					1.80126				6.60619				0.0124461					0.0103466				0.010592
0.524868				1.74161					0.138795				0.0106065				0.0110987					1.02093				11.7473					0.0111282				1.66496				3.5625					0.0103645				0.0106038
0.503097				2.94231					0.138963				0.0106115				0.0111004					0.685975				1.05751					0.494811				1.38583				0.00932948					0.0103658				0.0106145
0.894963				0.0502182					0.139733				0.0106143				0.0111041					4.51092				0.47531					0.743263				0.334145				0.0124449					0.0103723				0.0106167
2.45731				0.288532					0.140332				0.0106162				0.0111088					1.0724				0.412877					0.339964				0.815229				0.0108273					0.0103734				0.0106268
6.26664				0.354488					0.140349				0.0106311				0.0111152					0.0124449				0.685175					0.558599				1.15685				3.72981					0.0103875				0.0106415
0.442255				0.603832					0.140765				0.0106892				0.0111173					2.92325				0.00886188					0.12017				0.588827				0.0111958					0.0103899				0.0106439
2.05787				0.608842					0.140799				0.0107039				0.0111234					0.0122473				0.463313					0.704062				1.01907				0.0124452					0.010419				0.0106449
2.62975				0.905784					0.141532				0.0107158				0.0111327					4.01169				0.0124459					1.41902				2.01193				0.460647					0.0104248				0.0106474
0.012445				4.1443					0.142438				0.0107225				0.0111397					1.60396				1.60576					0.440028				1.74996				0.0167445					0.0104446				0.0106481
0.380332				2.17095					0.14362				0.0107258				0.0111402					3.29408				0.905009					0.807385				0.729272				2.00152					0.0104517				0.0106525
3.49465				2.01126					0.144099				0.0107311				0.011154					2.72765				0.636909					1.27841				2.865				0.394919					0.0104599				0.0106591
4.29536				1.64885					0.144127				0.01074				0.0111554					0.855002				1.73934					0.860944				0.706508				0.220078					0.0104599				0.0106603
0.664784				1.47976					0.144295				0.0107406				0.0111684					0.688995				2.2986					1.10943				3.9868				21.6414					0.0104602				0.0106612
3.08388				0.713498					0.144617				0.0107413				0.0111707					1.2197				0.491724					0.395009				2.57518				1.9492					0.0104652				0.01069
2.17248				3.35274					0.145628				0.0107419				0.0111831					3.9393				0.359448					0.681699				0.734687				2.69997					0.010477				0.0106931
2.90336				2.15227					0.146416				0.0107551				0.0111913					0.0983448				1.50207					1.4983				3.04754				0.0124459					0.0104835				0.0106979
1.85961				6.27176					0.146551				0.010765				0.0111914					0.325386				1.91638					0.876874				0.209233				0.556967					0.0105074				0.0107037
0.38373				2.87115					0.146952				0.0107679				0.0112137					0.0124449				2.26342					0.130049				0.932015				4.82893					0.0105084				0.0107074
0.852176				0.834083					0.148342				0.010774				0.0112162					0.699872				0.96758					0.0107793				0.0118947				0.294169					0.0105108				0.0107123
3.6827				3.56831					0.148686				0.0107897				0.0112242					0.533258				0.979107					0.358218				0.852303				1.26141					0.0105172				0.0107151
0.587102				0.885423					0.149957				0.0107955				0.0112318					2.01651				2.87069					0.194344				0.41529				0.271395					0.0105184				0.0107234
2.43142				0.84762					0.149979				0.0107984				0.0112374					0.339942				0.725039					0.0885369				8.89257				3.89177					0.0105533				0.0107403
1.07262				0.659528					0.150293				0.0108016				0.0112396					0.654399				0.653679					0.492941				0.336664				2.74457					0.0105659				0.0107522
1.67049				0.318795					0.150646				0.0108097				0.0112429					0.964294				7.59853					0.0686436				0.434452				2.00002					0.0105793				0.0107533
2.00393				0.626924					0.150856				0.0108184				0.0112472					0.986727				4.3241					0.845793				0.00931218				0.212542					0.0105926				0.0107579
0.784166				0.0109436					0.15147				0.0108189				0.0112525					4.21991				0.0794201					5.17873				0.571147				5.50606					0.0105982				0.0108098
0.809677				1.08513					0.151861				0.0108193				0.0112829					0.874746				0.0124449					0.402231				0.923416				1.16009					0.0106036				0.0108117
0.256205				0.0109553					0.152083				0.0108401				0.0112831					0.433978				0.136733					1.44251				1.62438				4.56362					0.0106197				0.0108139
1.71593				0.572497					0.152407				0.0108403				0.0112997					1.13936				1.21663					0.430262				1.89521				1.30648					0.0106233				0.010816
3.19183				4.56752					0.153211				0.0108597				0.0113039					1.02678				2.75971					2.53189				1.38284				1.21709					0.0106268				0.010818
2.25945				0.0123932					0.153335				0.0108705				0.0113043					2.89373				0.886092					0.326644				2.2582				1.88423					0.0106296				0.0108231
10.8729				0.551956					0.15354				0.0108718				0.0113194					0.191187				1.14502					0.00761239				1.38418				0.313334					0.0106345				0.0108286
7.847				1.74738					0.154002				0.0109031				0.0113351					0.358861				0.184642					0.641275				1.86735				3.58614					0.0106365				0.010838
8.76051				0.27017					0.154199				0.0109134				0.0113396					2.75373				1.34878					0.0124459				6.63059				0.0112757					0.0106481				0.0108381
4.43624				1.26081					0.155933				0.0109229				0.0113527					0.89931				1.36234					1.27255				0.0124449				1.765					0.010651				0.0108399
1.86014				1.60182					0.156533				0.0109265				0.0113645					2.10469				1.38975					0.102048				0.58434				0.0124452					0.0106608				0.0108477
1.24336				1.14322					0.157126				0.0109443				0.0113731					1.14415				1.32461					1.69235				0.344287				0.202684					0.0106984				0.0108482
0.606827				0.928813					0.157626				0.0109474				0.0113848					0.156246				1.00673					0.0112269				0.805414				1.77238					0.0107036				0.0108523
2.48954				1.36413					0.157637				0.010948				0.0114012					1.60404				1.1565					0.864682				0.27915				3.37299					0.0107085				0.0108558
0.181356				1.07936					0.157948				0.0109681				0.0114085					2.22937				3.73846					1.79189				6.56507				1.61185					0.0107092				0.0108576
1.10749				0.0124459					0.158044				0.0109828				0.0114128					2.61003				0.614863					0.793701				0.0122365				0.144178					0.0107174				0.0108652
0.76045				0.687711					0.158276				0.0109837				0.0114206					1.33693				2.62345					5.61377				1.20961				1.02112					0.0107195				0.0108719
7.36614				1.6705					0.15842				0.0109843				0.0114244					2.21398				0.264902					3.72847				2.07369				4.07229					0.0107225				0.0108727
2.01546				6.55089					0.158906				0.0109881				0.0114301					2.38372				1.32154					1.15614				0.0124459				3.11726					0.0107252				0.0108745
0.872615				1.71718					0.15922				0.0109989				0.0114353					3.03936				0.0110656					0.284609				1.20163				0.0124449					0.0107306				0.0108751
3.01141				0.130727					0.160152				0.0110036				0.0114386					1.64661				0.806797					0.939032				1.03508				0.876833					0.0107307				0.0108754
1.51788				1.20913					0.160337				0.0110148				0.0114442					1.48812				0.801748					0.0118826				0.0124449				13.3263					0.0107646				0.0108762
2.28129				0.584266					0.160771				0.0110186				0.0114564					0.513175				1.59819					1.447				11.5967				8.04318					0.0107684				0.0108773
1.54473				0.0115923					0.161101				0.0110259				0.0114608					2.86836				2.52994					1.32294				1.11636				3.39321					0.0107698				0.010886
3.29045				8.33661					0.162543				0.0110277				0.0114625					0.855093				0.551675					0.794824				0.89403				1.50497					0.0107729				0.0108941
0.67614				0.608984					0.164359				0.0110403				0.0114628					2.62725				1.0022					1.9074				1.39925				0.819883					0.0107767				0.0108977
1.74172				1.9397					0.164919				0.0110425				0.0114668					1.18871				0.0124449					1.91741				2.88904				1.44859					0.0107927				0.0108989
6.19951				2.04638					0.165032				0.0110674				0.0114673					1.00981				0.309435					0.904009				0.92713				3.01588					0.0108012				0.0109177
2.23545				4.07385					0.16552				0.0110769				0.0114685					1.36037				3.40083					1.55343				0.140649				0.0120974					0.0108244				0.0109195
2.47988				1.87144					0.165646				0.0110876				0.0114768					2.53495				0.588287					2.26791				0.246783				2.2983					0.010832				0.0109221
1.86265				4.50228					0.165712				0.0110922				0.0114811					0.451611				3.66378					1.00944				4.17409				1.77568					0.0108354				0.0109291
0.690199				0.00992252					0.165743				0.0110952				0.011491					3.5987				0.747318					1.18528				0.396821				0.0119596					0.0108447				0.0109353
3.64993				0.652085					0.166007				0.0111045				0.0114913					5.4974				5.48037					3.08144				0.285417				0.77192					0.0108501				0.0109374
0.458978				0.991675					0.166178				0.011121				0.0114992					0.833964				0.699699					0.00941268				0.234908				0.0124452					0.0108527				0.0109409
1.2828				2.64052					0.166398				0.0111215				0.0115008					1.98335				5.42262					0.849154				0.434929				1.60583					0.0108698				0.0109414
5.90325				0.984538					0.166942				0.0111413				0.0115036					2.08826				1.65595					0.258136				2.31087				0.0124452					0.0109035				0.0109424
1.41222				6.06876					0.167607				0.0111454				0.0115113					12.0944				0.0124459					0.60539				1.60817				0.0120615					0.0109212				0.0109516
2.6787				3.9148					0.167654				0.0111537				0.0115124					3.23262				0.978587					0.213705				0.257371				1.74896					0.0109296				0.0109558
5.70001				3.9274					0.168582				0.0111597				0.011535					2.7411				1.08436					0.613587				0.647715				4.42139					0.0109337				0.0109579
2.6711				3.28554					0.168791				0.0111619				0.0115388					3.03265				0.864739					0.0124457				0.712432				1.39244					0.0109351				0.01096
1.11401				2.2085					0.169207				0.0111655				0.0115527					0.648372				0.628267					0.943545				1.58115				0.0124452					0.0109466				0.0109624
0.202381				1.23835					0.170461				0.011174				0.0115568					0.45522				1.26496					0.0728637				0.599478				0.963009					0.0109582				0.0109639
0.921301				1.98922					0.170917				0.0111788				0.0115664					1.55155				1.25826					1.16082				1.95769				2.24563					0.0109597				0.0109765
1.09515				0.00955699					0.171605				0.0111807				0.0115696					1.52777				6.18311					1.5767				1.08009				1.03611					0.0109707				0.010995
1.13867				1.89139					0.172129				0.0111879				0.0115752					1.2078				0.415036					1.63216				3.5269				0.165954					0.0109949				0.0109962
0.818864				4.90411					0.173153				0.0111929				0.0115766					1.18553				0.750026					1.32934				0.0112162				0.898389					0.0109959				0.0109988
3.52802				2.93273					0.173453				0.0111974				0.0115822					0.476535				2.53707					0.215				3.28957				0.999823					0.0110023				0.0110025
1.99793				0.0107489					0.173502				0.0112092				0.0116009					0.456815				2.29056					0.266836				0.337972				0.696178					0.011003				0.0110124
0.840429				0.281929					0.173591				0.0112131				0.0116185					0.462699				0.905122					0.416044				0.0110742				0.480769					0.0110196				0.011013
1.24221				1.38584					0.173864				0.0112157				0.0116279					0.493102				0.0118106					0.944686				0.617089				1.54535					0.011024				0.0110245
1.32009				0.950003					0.173978				0.0112274				0.0116448					1.81681				0.215009					1.59665				2.84666				0.423028					0.0110604				0.0110268
0.377005				4.20996					0.17415				0.0112292				0.0116624					2.70003				3.70401					0.63979				0.156962				0.0124461					0.0110823				0.0110335
0.497455				3.3275					0.17446				0.0112299				0.0116684					1.02679				1.1569					0.408104				4.49518				0.0124452					0.0110825				0.0110408
1.01228				1.31245					0.174462				0.0112361				0.0116745					2.42436				1.38103					2.03251				1.06677				11.1641					0.0110863				0.0110452
0.663811				5.08405					0.175614				0.0112405				0.0116807					1.6043				0.383082					0.0101436				0.874779				0.0124452					0.0111062				0.0110462
1.86284				3.58533					0.176374				0.0112418				0.0116841					0.575837				0.261361					0.499486				0.417819				1.12798					0.011109				0.0110589
6.30789				0.585765					0.176585				0.0112524				0.0116901					2.83884				1.22005					0.414259				1.38174				2.62561					0.0111285				0.0110608
4.05748				0.70686					0.176834				0.01126				0.0116942					0.431452				0.273523					0.616871				1.48919				0.0124452					0.0111315				0.011071
3.20216				1.30448					0.176906				0.0112815				0.0116959					0.959031				1.19499					0.964149				0.648462				2.7842					0.011136				0.0110734
1.60061				0.656121					0.176993				0.0112817				0.0116964					1.28583				2.57259					2.16504				1.61505				0.0773303					0.0111363				0.0110805
7.80142				3.90125					0.177083				0.0112865				0.0117032					1.29163				2.16492					0.0124449				4.2125				1.24018					0.0111384				0.0110807
0.0121055				0.117045					0.17714				0.011287				0.0117047					0.448406				1.79333					0.594023				0.0124449				0.0124452					0.0111624				0.0110818
0.922184				0.79756					0.177708				0.0112894				0.0117063					0.349288				2.87364					1.48514				0.98509				2.53746					0.0111686				0.0110841
2.95054				3.45003					0.178261				0.0112909				0.0117076					0.419364				2.13578					1.25779				1.479				0.741762					0.0111739				0.0110918
1.53621				2.23601					0.17841				0.0112922				0.0117094					1.26686				2.03266					0.477527				1.57736				5.50676					0.0111841				0.0110934
0.628183				1.43325					0.179131				0.0112974				0.0117122					0.468928				3.16559					6.85326				1.21316				0.726433					0.0112032				0.0111018
0.837623				2.6217					0.179432				0.0113014				0.0117259					0.837061				0.79693					0.411112				0.20675				2.98733					0.0112042				0.0111105
1.29142				3.65409					0.179437				0.0113015				0.0117276					0.790995				4.06208					2.02926				0.113877				6.52695					0.0112104				0.0111153
6.73824				7.45475					0.179635				0.0113062				0.0117318					2.01801				1.08037					0.937119				1.69105				1.38633					0.0112133				0.0111212
6.97873				0.0124449					0.179694				0.0113073				0.0117335					4.36726				0.0124449					1.18083				0.557765				0.178382					0.0112252				0.0111222
2.15126				0.638062					0.180471				0.0113143				0.0117372					1.67998				4.91167					0.683803				4.18479				2.86298					0.0112288				0.0111226
3.86121				0.0590123					0.181035				0.0113156				0.0117389					0.13399				3.57043					0.540423				0.737272				0.729162					0.0112331				0.011125
3.38367				2.74008					0.182495				0.0113197				0.0117396					0.247919				1.28937					4.44131				1.19435				2.3099					0.0112436				0.0111326
7.12009				1.52262					0.183082				0.0113211				0.0117415					1.46935				2.44793					0.925078				0.667772				0.778338					0.0112445				0.0111331
1.04545				5.40337					0.18395				0.0113236				0.0117435					0.157665				0.534951					0.74015				0.0118663				0.182581					0.0112633				0.011139
1.51255				2.52692					0.184768				0.0113263				0.0117568					0.536444				0.950214					3.20459				0.194539				0.79148					0.0112684				0.0111423
2.30605				2.15666					0.18521				0.011337				0.0117655					4.23241				2.18795					0.617959				0.668343				1.0643					0.0112821				0.0111461
1.09218				2.27506					0.185215				0.0113477				0.011769					0.718279				0.523936					0.0124454				1.47224				3.45828					0.0112841				0.0111486
3.00105				0.0124459					0.185216				0.0113528				0.0117743					1.18858				0.713398					0.851002				0.0124449				0.0512775					0.0112858				0.0111505
1.06278				1.10867					0.185553				0.0113529				0.0117756					2.61817				2.43686					1.09344				0.305864				0.179593					0.0112911				0.011157
1.2244				1.46918					0.185955				0.0113543				0.011779					0.953657				0.462543					1.78557				2.7613				0.00889683					0.011296				0.0111598
3.01342				2.28096					0.186134				0.0113578				0.0117809					1.04297				1.32092					0.149819				2.32292				2.46857					0.0113003				0.0111613
1.47976				1.06509					0.186343				0.0113645				0.0117809					1.32747				1.08811					1.31354				0.609696				1.15721					0.0113088				0.0111632
2.77053				0.0112054					0.18671				0.0113933				0.0118021					7.1807				0.430575					1.09091				1.17899				0.519771					0.0113347				0.0111643
0.0124452				1.56078					0.186999				0.0113955				0.0118029					3.12081				1.00773					2.37757				0.0124449				2.41757					0.0113562				0.0111731
1.0822				0.68286					0.187013				0.0113956				0.0118044					0.725982				1.08526					0.583913				0.0092283				3.00512					0.0113598				0.0111741
1.7611				0.633122					0.188144				0.0113976				0.0118061					5.72475				0.235667					0.265426				2.49634				0.0124452					0.0113657				0.0111747
5.04048				0.0124449					0.188241				0.011402				0.0118068					3.56749				0.0124449					3.91371				0.176198				3.71423					0.0113756				0.0111764
2.29971				2.49553					0.18838				0.0114034				0.0118108					0.516377				0.010068					0.327277				0.0124449				2.43674					0.0113808				0.0111773
2.77091				2.20528					0.188525				0.0114044				0.0118132					2.1529				6.07752					3.38636				0.0124459				3.10602					0.0113914				0.0111874
1.22816				4.73709					0.188607				0.0114089				0.0118224					2.92709				0.484401					0.850252				6.67877				1.15404					0.0113975				0.0111919
4.53878				1.37467					0.18871				0.0114105				0.0118232					0.149826				0.329751					0.374663				0.198298				0.778132					0.0114011				0.0111982
1.74613				2.3839					0.188997				0.0114352				0.0118328					0.460357				1.03691					0.769305				0.673287				2.16353					0.0114076				0.0112034
3.02552				1.3923					0.18956				0.0114368				0.011838					0.833714				1.87481					0.621526				2.97725				1.52459					0.0114347				0.0112072
1.78543				2.87084					0.190189				0.0114396				0.0118511					0.165294				0.835307					1.0445				0.080372				0.290318					0.0114411				0.0112138
0.478111				1.43631					0.190288				0.01144				0.0118523					7.9067				1.20721					1.97185				1.92367				5.9521					0.0114706				0.0112166
1.90504				1.3385					0.190596				0.0114408				0.0118588					0.162237				0.0714694					0.983923				0.324989				0.164113					0.0114794				0.0112243
0.012445				0.962477					0.191716				0.0114427				0.0118592					0.57102				0.50363					0.762254				4.24218				3.03943					0.0115067				0.0112323
0.0124461				0.79719					0.191723				0.011443				0.0118678					2.09748				0.544679					0.808129				2.31913				0.67712					0.0115184				0.0112399
0.85381				1.24662					0.193104				0.0114448				0.0118826					1.15666				0.266287					0.0110073				0.978549				3.56901					0.0115525				0.0112413
3.64473				1.84035					0.193544				0.0114509				0.0118886					1.92836				0.59181					1.71604				1.23766				2.16236					0.0115597				0.0112457
0.0124461				0.925809					0.193762				0.0114549				0.0118894					2.73642				2.15954					0.151341				0.520647				0.0120533					0.0116096				0.0112481
4.30122				0.00992251					0.193793				0.0114626				0.0118919					0.679047				1.52443					2.73219				1.73965				4.17158					0.0116223				0.0112495
0.010504				1.22638					0.19415				0.0114635				0.0118964					4.61228				0.559573					0.103915				1.46868				1.47452					0.0116288				0.0112522
1.98614				1.17491					0.194227				0.0114746				0.0119019					0.666075				0.837314					1.11511				0.0124449				0.712095					0.0116506				0.0112525
4.4953				1.24955					0.19445				0.0114784				0.0119041					0.1578				0.934467					0.16871				1.63859				3.41303					0.0116629				0.0112532
0.963409				2.7373					0.194593				0.0114797				0.0119042					5.96811				2.22546					0.536086				3.58352				0.87218					0.0116676				0.0112581
8.28175				3.87039					0.195081				0.0114817				0.0119097					0.313446				1.61226					0.536462				0.0124469				1.04311					0.0116759				0.0112622
3.98591				0.276341					0.195151				0.0114831				0.0119099					3.77468				0.0123837					1.22919				0.67579				1.12673					0.0116786				0.0112624
1.1282				2.1492					0.195603				0.0114833				0.0119119					1.3697				7.17235					0.272676				0.726334				2.15811					0.0116831				0.0112686
8.8065				0.0104757					0.197212				0.0114953				0.0119155					0.971916				2.27539					0.455547				3.34073				1.4522					0.0116865				0.0112758
3.9423				0.748088					0.197258				0.0115028				0.0119207					0.710581				2.97599					1.25241				3.14918				1.97015					0.0117154				0.0112781
4.11863				0.603932					0.197832				0.0115034				0.0119211					0.342242				1.53798					0.473101				0.586564				1.63274					0.0117161				0.0112791
1.52682				1.72782					0.198033				0.0115052				0.0119212					0.873832				1.6456					2.51161				1.49008				1.74574					0.0117296				0.0112794
2.45512				5.33852					0.199049				0.0115149				0.0119335					0.850176				0.579268					3.27916				0.592563				0.39111					0.0117407				0.0112903
2.90703				1.0903					0.199197				0.0115241				0.0119518					2.85309				1.74604					0.61415				0.0124459				0.299684					0.0117498				0.011291
3.16475				2.83364					0.199231				0.0115274				0.011953					1.1752				1.98073					0.277905				1.46381				1.11518					0.0117516				0.0112981
5.0692				2.1535					0.200012				0.0115421				0.0119646					0.752602				1.04865					0.956696				1.7108				2.14821					0.0117577				0.0113038
3.00071				1.11649					0.200108				0.0115466				0.0119655					1.01389				0.785786					0.0622663				0.263637				0.769863					0.0117594				0.0113073
2.20237				0.816942					0.200192				0.0115498				0.0119665					2.61382				0.26169					0.526829				1.53432				1.87325					0.0117674				0.0113113
1.40319				0.307562					0.200194				0.0115521				0.011988					1.40559				1.27288					0.821038				0.15269				0.0102532					0.0117693				0.0113287
1.9776				0.158045					0.2003				0.0115558				0.0119986					1.9814				0.928355					0.0641107				5.92762				0.187321					0.0117759				0.0113357
0.988832				0.713513					0.200463				0.0115612				0.0119995					9.06907				1.14908					3.71668				1.56483				2.19682					0.0117854				0.0113383
3.38221				1.09871					0.200663				0.0115742				0.0120029					0.0124459				2.23557					0.341706				1.09125				2.66874					0.0117953				0.0113425
3.02242				2.20175					0.200951				0.0115781				0.0120131					4.18577				0.864409					2.25692				4.9505				1.49346					0.0118107				0.0113428
1.8484				0.530916					0.201161				0.0115819				0.0120183					1.88788				5.79125					0.924477				0.211486				0.641454					0.01182				0.0113515
0.0124452				0.757984					0.201615				0.0115846				0.0120213					0.461107				2.04939					0.653293				2.40619				0.0124452					0.0118321				0.0113545
3.74358				1.44343					0.202282				0.0115938				0.0120249					2.06147				1.66727					0.364338				0.861194				7.2991					0.0118379				0.0113557
4.04675				0.0124459					0.202528				0.0115959				0.0120266					2.61363				0.910257					0.160634				0.0124459				0.0124452					0.0118432				0.0113624
4.01407				0.816214					0.202814				0.0115982				0.0120458					0.740321				1.83569					1.80848				0.0122031				1.05827					0.0118437				0.0113641
1.10823				0.511642					0.202887				0.0116021				0.0120478					0.0111549				4.87911					0.37486				0.421113				0.290543					0.0118496				0.0113653
3.70978				2.03895					0.203115				0.0116038				0.0120484					2.49545				0.63623					3.12995				1.07356				0.962529					0.0118612				0.0113712
3.81585				0.299763					0.203266				0.0116067				0.0120532					2.08606				2.67951					0.883105				4.98009				1.10898					0.0119066				0.0113724
2.08744				0.364921					0.203882				0.0116068				0.0120558					2.55399				1.76963					0.00919292				5.06263				0.851153					0.0119077				0.0113749
8.32396				1.54608					0.204288				0.0116078				0.0120633					0.855641				3.99719					0.720876				2.01647				0.00899441					0.0119168				0.0113781
3.97392				0.923938					0.204303				0.0116159				0.012067					0.33337				2.86328					1.7592				0.696595				2.13224					0.0119269				0.0113843
3.24028				0.426521					0.205597				0.0116161				0.0120944					3.66798				0.728265					0.40011				1.87244				5.7585					0.0119375				0.0113857
7.61171				0.633829					0.20607				0.0116174				0.012095					0.011737				0.0124449					2.53369				0.307261				0.32893					0.0119415				0.0113902
2.29787				0.758403					0.206723				0.0116201				0.0120962					0.564595				2.35096					4.46281				0.645663				0.011787					0.0119479				0.0113994
2.35297				1.21065					0.207143				0.0116205				0.0121007					1.43828				0.627805					0.0628809				0.0944919				1.79101					0.011954				0.0114029
1.5325				2.93829					0.208395				0.0116214				0.0121092					6.65471				1.67563					0.144823				1.63553				0.0121762					0.0119564				0.0114083
2.97809				3.01741					0.20903				0.011622				0.0121116					0.453186				0.227002					2.68338				2.76305				3.44079					0.0119592				0.0114107
1.15943				2.2728					0.209226				0.0116297				0.012114					1.50357				1.94622					0.475343				1.40379				0.696294					0.0119669				0.0114149
4.95588				0.774792					0.210275				0.0116351				0.0121237					0.648983				2.31769					0.0124449				0.202489				1.427					0.0119705				0.0114198
4.00297				0.422262					0.210431				0.0116373				0.0121321					1.19212				0.62778					0.602045				0.788973				1.10586					0.0119904				0.0114207
4.49068				0.488484					0.210706				0.0116454				0.0121325					2.05948				2.7307					0.312093				1.94037				3.72699					0.0119934				0.0114222
13.4187				2.9816					0.211011				0.0116472				0.0121385					3.34833				1.27846					0.307607				1.65263				10.2868					0.0119991				0.0114237
4.13088				3.72796					0.211756				0.0116476				0.0121524					0.569845				4.66779					0.833047				0.954501				1.07412					0.0120014				0.011449
0.211128				1.28619					0.212141				0.0116543				0.0121688					0.293225				1.47612					1.39474				1.47357				0.373259					0.0120199				0.0114533
4.9213				0.782621					0.212382				0.0116579				0.0121807					1.84154				0.385903					0.533205				0.233235				0.26932					0.0120246				0.0114606
0.816209				0.330962					0.213053				0.0116596				0.0121811					1.13161				0.889868					1.47684				1.099				0.0121306					0.0120285				0.0114637
2.15282				0.575399					0.213136				0.0116616				0.0121859					3.56939				0.821638					0.42226				5.85166				2.96183					0.0120444				0.0114657
1.90628				1.18627					0.213203				0.0116671				0.012191					0.47092				0.250703					1.71975				0.0105068				5.24723					0.0120474				0.0114683
2.62191				0.846692					0.213273				0.011678				0.0121968					5.88351				2.54659					0.0808515				1.76418				1.07025					0.0120602				0.0114683
1.06246				0.51885					0.213503				0.0116895				0.0122057					0.692994				1.7393					0.425747				0.708773				7.48533					0.0120603				0.0114689
2.06875				0.603566					0.213576				0.0116901				0.0122108					1.21964				1.42827					1.53298				0.861036				3.02555					0.0120678				0.0114699
0.694381				0.445048					0.213985				0.0117003				0.012214					2.14474				0.295373					0.538621				1.06507				1.75949					0.0120785				0.0114702
3.93204				1.0187					0.214562				0.0117038				0.0122467					0.0109687				1.65583					1.08569				1.42753				3.57685					0.01208				0.0114786
2.00779				0.134373					0.214992				0.0117056				0.0122603					3.05311				0.426795					0.965609				2.94153				0.0124452					0.0120817				0.011479
6.88153				0.819374					0.215427				0.0117085				0.0122603					0.239811				3.25116					0.917799				0.719583				3.71925					0.0120895				0.011484
3.2504				0.185864					0.215683				0.0117193				0.0122775					0.648409				0.857531					1.13258				0.42846				4.88342					0.012115				0.0114872
0.612651				0.1271					0.215821				0.0117208				0.0122875					0.247677				1.87006					0.324794				0.367979				0.950179					0.0121358				0.0114874
4.75389				1.13317					0.217242				0.011726				0.0122934					1.00694				0.0124469					1.8165				0.155231				2.70068					0.0121374				0.0114878
1.18221				0.616787					0.217722				0.0117283				0.0122972					2.17908				0.97773					0.225437				2.67353				0.874375					0.0121426				0.0114912
7.23126				0.542739					0.217745				0.0117297				0.0122984					1.6217				1.55976					2.84802				1.21934				0.228371					0.0121441				0.011492
6.55071				0.179809					0.217838				0.0117344				0.0123057					0.243586				1.83568					1.91042				0.280692				3.09368					0.0121706				0.0114997
1.12089				0.714595					0.217885				0.0117396				0.0123145					1.59592				0.707928					0.642283				3.53557				0.308741					0.0121715				0.0115008
1.34757				0.296943					0.21857				0.0117403				0.0123214					1.01423				3.49911					2.53492				0.0124459				2.14032					0.0121822				0.0115009
2.60196				0.301133					0.21976				0.0117447				0.0123275					1.65178				0.0124459					2.88863				0.108605				0.893601					0.0121859				0.0115041
1.81139				2.73991					0.219797				0.0117515				0.0123315					0.0124449				1.67746					0.649731				0.498622				0.322387					0.0121881				0.0115053
1.81407				0.0119124					0.220628				0.0117519				0.012336					0.515662				1.74865					0.476548				3.28407				8.0484					0.012194				0.0115066
2.46617				0.00999164					0.222308				0.0117527				0.0123384					1.95473				0.0124449					0.537966				5.43549				0.0124452					0.0121973				0.0115129
2.74507				0.466012					0.222742				0.0117575				0.0123525					1.65089				2.50658					0.477799				0.691437				0.211196					0.0122344				0.0115158
0.690351				0.464287					0.223132				0.0117584				0.0124057					1.78729				1.3534					2.50214				0.610778				1.3099					0.0122411				0.0115195
1.51821				1.00905					0.223161				0.0117586				0.0124229					0.943663				6.98352					0.210784				0.19671				0.502249					0.0122551				0.0115345
0.0121573				1.39764					0.223525				0.0117593				0.012425					0.633529				0.446499					3.74035				4.31224				0.0124452					0.0122735				0.0115361
0.207692				0.78051					0.223855				0.0117688				0.0124289					1.33192				3.43463					0.124541				1.59008				1.35781					0.012278				0.0115401
1.72741				0.832934					0.22401				0.01177				0.0124319					1.51447				0.907955					2.38305				3.36465				0.0124452					0.012279				0.0115435
4.72319				0.364761					0.22426				0.0117768				0.012435					0.74338				1.91132					0.202868				1.19937				0.91128					0.0122866				0.0115451
0.444003				0.303602					0.224502				0.0117774				0.0124403					1.74794				1.20337					1.8205				0.776068				2.95657					0.0122892				0.0115487
1.39735				1.31897					0.224517				0.0117843				0.0124439					0.38862				0.444804					0.185302				0.173275				4.30238					0.0122927				0.0115496
4.90747				1.14063					0.225258				0.0117876				0.0124442					4.40448				1.57273					0.879538				0.0124449				0.469081					0.0122932				0.0115509
1.50372				0.96272					0.225537				0.0117877				0.0124444					4.76577				2.03118					0.533476				0.824566				0.378103					0.0123074				0.0115548
4.20865				3.0454					0.225694				0.0117952				0.0124444					10.0109				1.60543					0.160188				2.38304				0.0121447					0.0123167				0.0115604
6.01156				0.684155					0.227019				0.0118026				0.0124449					0.948716				0.62972					0.828381				3.82943				0.460147					0.0123199				0.0115705
1.60461				0.551639					0.22702				0.0118064				0.0124449					0.680185				1.6419					1.12443				0.68288				0.0581152					0.0123351				0.0115714
4.40807				0.0732926					0.227476				0.0118096				0.0124449					0.48162				0.766833					1.20161				0.647846				2.82576					0.0123402				0.0115747
3.66896				1.64353					0.227572				0.0118131				0.0124449					0.391015				1.35887					2.68004				1.06003				1.01891					0.0123496				0.0115778
1.73768				0.285913					0.227631				0.0118185				0.0124449					1.89636				0.95915					1.29299				1.35834				0.0124452					0.0123555				0.0115785
5.53103				1.1723					0.227642				0.0118252				0.0124449					2.77447				1.38946					2.98356				0.454104				0.95752					0.012368				0.0115802
6.07311				1.54812					0.227679				0.011829				0.0124449					3.32437				1.99217					0.0995995				0.790217				2.22875					0.0123687				0.0115808
14.1757				0.221998					0.228258				0.0118351				0.0124449					1.94653				0.103315					1.77635				0.886224				0.0124461					0.0124033				0.0115821
2.36536				0.652062					0.228719				0.0118422				0.0124449					0.372723				1.41454					1.50664				0.170381				0.573073					0.0124258				0.0115846
2.71135				0.425591					0.228792				0.0118429				0.0124449					1.45818				0.206526					4.18795				0.70586				0.110342					0.0124286				0.0115881
5.93998				0.83149					0.229696				0.011846				0.0124449					0.169658				1.90704					0.468024				0.328533				0.36425					0.0124304				0.0115964
3.88149				2.92148					0.229745				0.0118517				0.0124449					1.33267				1.93983					0.282795				1.58349				1.20222					0.0124315				0.0115968
0.648018				0.0111639					0.229981				0.0118519				0.0124449					5.61866				5.46069					1.09407				1.65327				0.0124452					0.0124402				0.0115975
0.285766				0.29408					0.230404				0.0118583				0.0124449					2.50094				1.31301					3.30216				4.5437				0.0124452					0.0124439				0.0115987
2.62407				0.266929					0.23098				0.0118592				0.0124449					0.340027				1.27683					0.430173				0.634285				0.530734					0.0124439				0.0116003
6.4873				0.456798					0.231149				0.0118666				0.0124449					2.30451				0.528377					0.339693				0.828921				0.772825					0.0124439				0.0116022
1.63294				0.839763					0.231333				0.0118671				0.0124449					0.979092				1.98128					0.386039				3.92195				4.07483					0.0124444				0.0116083
0.922866				0.369634					0.231784				0.011876				0.0124449					1.65963				0.627047					2.65137				1.18364				0.13884					0.0124449				0.0116107
0.896451				0.651347					0.233429				0.011885				0.0124449					0.561204				1.68153					0.0116117				7.68026				0.638657					0.0124449				0.011614
1.19487				0.618335					0.234221				0.0118865				0.0124449					1.25247				0.63335					0.790972				2.07358				0.29261					0.0124449				0.0116221
0.0121626				1.52645					0.234333				0.0119001				0.0124449					2.10204				0.802154					1.40208				4.63525				0.344652					0.0124449				0.0116223
2.51262				0.246914					0.234849				0.011902				0.0124449					1.24457				1.7991					1.9486				2.01258				0.987332					0.0124449				0.0116236
1.43557				0.266856					0.235319				0.011902				0.0124449					2.32179				0.862227					0.156322				1.95076				1.53998					0.0124449				0.011629
2.64903				0.145903					0.235747				0.0119028				0.0124449					1.26416				1.19185					5.05925				0.221946				1.92895					0.0124449				0.01163
5.39923				0.327874					0.236479				0.0119082				0.0124449					2.2712				1.92267					1.46018				1.38622				0.468316					0.0124449				0.0116304
0.601659				1.10095					0.23673				0.0119104				0.0124449					3.50958				2.08914					0.361079				3.05754				3.59428					0.0124449				0.0116343
2.04941				1.68847					0.237051				0.0119114				0.0124449					2.03944				1.19281					0.604749				6.28235				0.0109354					0.0124449				0.0116389
1.723				1.18138					0.237099				0.0119151				0.0124449					4.49937				1.04977					0.395885				4.2812				0.0124452					0.0124449				0.0116428
7.84378				1.13775					0.237149				0.0119158				0.0124449					0.576124				4.26356					2.92701				1.68664				0.448939					0.0124449				0.0116457
9.18849				0.736565					0.23734				0.0119159				0.0124449					0.0124459				0.549217					1.2582				1.85729				1.14723					0.0124449				0.0116461
14.0742				0.418488					0.237931				0.0119184				0.0124449					0.0852478				2.04764					0.0113759				0.0120663				0.853987					0.0124449				0.0116479
1.16877				0.700033					0.238657				0.0119197				0.0124449					1.04366				0.839013					2.61739				0.612151				0.755859					0.0124449				0.0116494
1.51524				1.80673					0.238712				0.0119199				0.0124449					0.067179				0.851656					1.19545				1.90695				5.12568					0.0124449				0.0116536
5.73398				2.24128					0.239403				0.0119275				0.0124449					0.89509				0.850425					3.97583				0.0116485				0.884006					0.0124449				0.0116552
0.471537				0.228754					0.23953				0.0119358				0.0124449					0.188649				1.19767					2.97045				0.481343				0.1762					0.0124449				0.0116565
0.966111				2.2846					0.239548				0.0119384				0.0124449					0.144493				0.383474					0.986093				1.64539				0.761667					0.0124449				0.0116617
1.68008				1.34545					0.239727				0.0119435				0.0124449					0.24971				1.02032					1.34523				0.191698				0.0117809					0.0124449				0.0116624
1.44876				2.55862					0.240048				0.0119482				0.0124449					1.39955				5.49805					0.411777				0.315585				1.75381					0.0124449				0.0116633
1.50577				1.05043					0.240295				0.011949				0.0124449					6.26817				0.940861					2.02577				1.73805				5.2109					0.0124449				0.0116658
6.92954				4.99905					0.240299				0.0119521				0.0124449					1.37284				4.85644					1.54045				1.34815				3.03255					0.0124449				0.011668
7.04912				0.0956719					0.240618				0.0119603				0.0124449					0.738923				2.24792					1.74203				3.47352				0.243239					0.0124449				0.0116691
1.5463				0.0120079					0.241125				0.0119721				0.0124449					0.410686				0.910616					4.12295				0.0108522				2.92387					0.0124449				0.0116701
2.99999				0.415965					0.241604				0.0119722				0.0124449					6.09101				0.67904					1.53524				3.12979				1.32922					0.0124449				0.0116735
6.14542				1.18461					0.242427				0.0119738				0.0124449					0.417002				0.833563					0.0124449				0.742024				1.24574					0.0124449				0.0116749
7.06754				1.21172					0.242978				0.0119743				0.0124449					0.0115481				0.838135					0.462565				22.3542				5.15336					0.0124449				0.0116749
5.07296				1.14788					0.243415				0.0119768				0.0124449					1.26408				1.03765					0.543231				0.958611				0.626335					0.0124449				0.0116775
2.1535				1.35782					0.243861				0.0119901				0.0124449					0.553329				2.57388					4.00402				0.0124449				3.65762					0.0124449				0.0116777
3.99612				0.945067					0.245075				0.0120005				0.0124449					1.4005				3.39201					0.951571				0.98251				4.50627					0.0124449				0.0116797
9.78243				0.97855					0.245496				0.0120033				0.0124449					2.17638				0.627953					2.72094				1.99137				0.827502					0.0124449				0.0116804
8.58766				1.02374					0.246312				0.0120042				0.0124449					0.966715				1.71779					0.0124461				1.35972				1.71469					0.0124449				0.011684
0.0124452				2.5382					0.246779				0.0120058				0.0124449					0.404519				0.520782					0.574536				1.12203				0.28216					0.0124449				0.0116846
2.0447				0.683919					0.246841				0.0120097				0.0124449					0.635909				0.791743					4.38297				1.87243				3.10699					0.0124449				0.0116861
3.06946				3.56985					0.24722				0.0120159				0.0124449					2.75186				1.88541					4.96273				0.952088				0.286222					0.0124449				0.0116885
3.16948				4.79623					0.248051				0.0120169				0.0124449					2.0109				0.817665					2.15521				0.0114754				9.51995					0.0124449				0.0116888
2.6497				0.600717					0.24861				0.0120209				0.0124449					2.86317				4.39777					0.420853				1.79348				1.26843					0.0124449				0.0116917
1.8829				0.012254					0.248862				0.0120267				0.0124449					0.294176				0.0102291					0.614227				1.04791				0.936243					0.0124449				0.0117043
2.27333				0.480154					0.249133				0.0120273				0.0124449					2.77936				2.27235					5.84672				2.37911				1.85082					0.0124449				0.0117051
2.56069				0.535474					0.24918				0.01203				0.0124449					0.764741				4.66043					2.56551				1.20907				1.45538					0.0124449				0.0117077
1.73588				1.6419					0.250417				0.0120343				0.0124449					1.25793				2.11486					0.604653				0.320995				3.83683					0.0124452				0.0117088
0.441181				1.36902					0.251511				0.0120375				0.0124449					0.142083				0.0124449					0.259708				1.35709				0.258116					0.0124452				0.0117135
2.2701				0.340049					0.251679				0.0120416				0.0124449					0.490818				0.313354					0.959881				2.01416				0.513498					0.0124452				0.0117143
8.64269				0.0124246					0.251769				0.0120428				0.0124449					0.0914782				1.60272					0.766332				0.697628				3.54578					0.0124452				0.0117146
0.012445				2.75155					0.252975				0.0120433				0.0124449					1.21657				0.962801					2.17772				0.0124449				1.26711					0.0124452				0.0117171
0.308762				0.748289					0.253032				0.0120442				0.0124449					0.744103				1.14251					0.716228				1.11726				1.00956					0.0124452				0.0117209
2.13969				0.334297					0.253187				0.0120502				0.0124449					0.851492				1.33904					1.89072				5.76292				1.55836					0.0124452				0.0117218
3.922				2.85486					0.253457				0.012052				0.0124449					0.697626				0.688488					0.648893				2.49056				9.2291					0.0124452				0.0117303
5.05525				2.54368					0.253752				0.0120592				0.0124449					0.177659				0.187681					1.75477				0.383077				2.07022					0.0124452				0.0117314
5.4264				0.428847					0.254065				0.0120651				0.0124449					3.77812				3.94866					0.594211				1.10701				2.28379					0.0124452				0.0117335
6.52949				1.01001					0.254341				0.0120729				0.0124449					1.57768				3.17313					0.856163				0.17893				5.90885					0.0124452				0.0117393
2.51122				0.601211					0.254656				0.0120753				0.0124449					1.09413				3.20604					0.55762				3.09788				0.0124449					0.0124452				0.0117437
1.83338				0.0124469					0.255497				0.012076				0.0124449					1.08403				0.314126					2.42677				3.2541				0.92918					0.0124452				0.0117447
1.54409				2.15176					0.25593				0.0120813				0.012445					1.85847				1.4173					1.9258				2.01451				0.315369					0.0124452				0.0117468
1.69619				3.93906					0.256056				0.0120855				0.012445					0.129817				0.0124449					0.216979				1.44875				0.0547873					0.0124452				0.011748
0.538199				2.12087					0.256098				0.012087				0.012445					0.637054				0.749133					1.31221				1.57602				1.54917					0.0124452				0.0117501
3.26981				3.61723					0.256548				0.0120878				0.012445					0.354899				1.19874					0.227864				1.23272				1.0853					0.0124452				0.0117507
1.60603				0.389139					0.256634				0.0120901				0.0124451					0.619877				5.93126					1.69014				0.374229				1.3744					0.0124452				0.011751
3.06513				1.36132					0.257464				0.0120918				0.0124451					0.431026				2.72894					0.959606				0.0124449				1.68553					0.0124452				0.0117556
1.46023				1.63366					0.257477				0.0120938				0.0124451					1.70884				0.568775					0.69364				0.447344				0.428873					0.0124452				0.0117583
4.03142				0.184807					0.257723				0.0120947				0.0124451					0.755947				2.40659					7.00834				0.719146				6.12598					0.0124452				0.0117618
0.702485				6.4536					0.259255				0.0120976				0.0124451					1.24003				7.77178					3.53042				2.20854				0.410308					0.0124452				0.0117653
3.47502				2.84355					0.260457				0.0121034				0.0124451					0.0124469				2.47438					0.794219				0.656071				0.482205					0.0124452				0.0117673
4.39571				0.0116779					0.261774				0.0121043				0.0124451					0.130128				1.03129					0.529156				0.523938				1.16854					0.0124452				0.0117725
1.34086				3.04581					0.261903				0.0121076				0.0124451					4.58075				3.12879					0.742378				1.18189				1.63183					0.0124452				0.0117738
3.32235				1.16178					0.262535				0.0121115				0.0124451					1.00846				1.29113					1.52375				2.03743				0.611428					0.0124452				0.0117739
6.90687				2.9989					0.262685				0.0121201				0.0124451					0.86552				1.88927					1.24015				0.98167				1.96123					0.0124452				0.0117754
0.564462				0.347497					0.263318				0.012121				0.0124451					0.310616				3.29879					3.43119				1.30762				1.31884					0.0124452				0.0117758
6.98757				0.542066					0.263775				0.0121335				0.0124451					3.42117				1.21892					0.0700898				0.798008				2.22268					0.0124452				0.0117766
0.808423				0.80718					0.263829				0.0121379				0.0124451					0.380798				1.51367					1.11629				0.868802				2.48202					0.0124452				0.0117771
1.04327				0.20157					0.264548				0.0121457				0.0124451					1.60183				0.150446					1.35384				0.733641				3.23217					0.0124452				0.011778
0.425593				1.57436					0.264703				0.0121566				0.0124451					0.596363				0.262321					1.65686				3.00871				0.0117045					0.0124452				0.0117797
1.014				1.82709					0.26529				0.0121631				0.0124452					2.35967				1.46652					0.520151				3.81676				0.377118					0.0124452				0.0117814
1.23621				8.25787					0.265381				0.0121632				0.0124452					0.606025				0.13091					0.448645				1.13082				0.717841					0.0124452				0.0117818
3.20411				0.839224					0.26543				0.0121645				0.0124452					0.776332				3.60475					0.673382				0.0124449				2.32205					0.0124452				0.0117826
0.0124454				0.683005					0.265456				0.0121653				0.0124452					0.325758				0.958449					1.97656				1.02952				0.423945					0.0124452				0.0117893
0.198122				0.494965					0.265787				0.0121663				0.0124452					0.481995				1.20215					0.264499				0.422758				2.6332					0.0124452				0.0117919
5.22914				0.381623					0.265911				0.0121676				0.0124452					2.94896				0.432256					1.47753				0.339861				1.73251					0.0124452				0.0117945
5.94101				2.96342					0.266015				0.0121689				0.0124452					1.27995				0.286803					1.44114				0.355436				0.358794					0.0124452				0.0117994
1.71021				1.84134					0.266251				0.0121694				0.0124452					2.64579				1.36018					0.037757				0.587253				0.0124449					0.0124452				0.0117996
4.88238				1.3025					0.266358				0.0121758				0.0124452					0.751226				1.59353					8.11092				2.07075				1.36071					0.0124452				0.0118031
7.0465				1.37134					0.266481				0.0121761				0.0124452					5.96301				1.50485					0.663665				0.795976				0.944385					0.0124452				0.0118047
13.4033				0.0124449					0.267267				0.0121815				0.0124452					0.193306				1.33606					2.73322				0.77461				1.2822					0.0124452				0.0118049
0.721691				0.0124449					0.267416				0.0121931				0.0124452					0.678907				0.372947					1.2251				0.155616				1.33829					0.0124452				0.0118091
2.22699				1.57053					0.267602				0.012198				0.0124452					0.848667				2.12033					1.77606				4.09116				0.0124452					0.0124452				0.0118107
2.44419				0.510338					0.267669				0.0121992				0.0124452					4.78004				1.82403					0.475558				1.53767				0.989486					0.0124452				0.0118113
0.573926				0.329191					0.268292				0.0122013				0.0124452					2.7156				0.681939					0.780008				0.0108725				0.105415					0.0124452				0.0118158
0.885232				0.114924					0.268462				0.0122081				0.0124452					2.00675				3.17222					1.33672				0.40099				1.40898					0.0124452				0.0118185
8.78129				1.87076					0.269171				0.0122197				0.0124452					0.411429				0.899065					2.90919				2.14187				1.61113					0.0124452				0.0118223
0.923093				0.887635					0.269667				0.0122216				0.0124452					4.29384				0.454652					0.804935				1.07236				0.495484					0.0124453				0.0118251
2.07044				0.160409					0.270147				0.012231				0.0124452					0.504477				2.42886					0.335838				0.275446				1.09393					0.0124454				0.0118273
8.93972				0.19763					0.270452				0.0122396				0.0124452					1.28337				0.590868					2.81925				1.39088				1.64882					0.0124454				0.011829
0.9408				0.0331945					0.27084				0.0122401				0.0124452					0.0753313				1.42839					1.07686				1.76352				0.794344					0.0124454				0.0118309
2.05178				0.68126					0.271246				0.0122433				0.0124452					2.92137				4.63861					2.7915				0.311552				0.262388					0.0124454				0.0118329
0.235688				0.573109					0.27182				0.0122444				0.0124452					2.76878				0.0111811					0.745104				0.308077				4.82619					0.0124454				0.0118359
0.353765				1.29284					0.271946				0.0122463				0.0124452					1.3778				0.458602					1.39863				1.06342				2.04494					0.0124454				0.0118362
0.547417				0.673599					0.272155				0.012247				0.0124452					0.608202				0.265717					1.96002				2.24993				0.0124452					0.0124454				0.0118429
3.73929				0.121488					0.272422				0.0122482				0.0124452					0.318324				0.89505					4.54372				0.777487				1.73724					0.0124454				0.0118449
6.70656				3.77999					0.272517				0.0122631				0.0124452					1.41179				0.971387					3.0213				0.858167				0.437262					0.0124454				0.0118455
1.05497				3.16178					0.27356				0.0122631				0.0124452					0.49228				0.467477					1.16291				3.17165				2.04303					0.0124454				0.0118459
1.57978				0.0111136					0.273763				0.0122636				0.0124452					0.527817				1.68124					0.96209				1.63768				0.0118367					0.0124454				0.0118464
1.67799				3.72595					0.274068				0.0122695				0.0124452					0.982415				0.669716					4.0279				0.93564				3.61539					0.0124454				0.0118483
0.697032				2.21892					0.274181				0.0122724				0.0124452					0.873218				0.650462					0.322787				0.911331				1.07468					0.0124454				0.0118493
5.74842				3.20727					0.274348				0.0122739				0.0124452					0.257931				1.87918					0.435507				2.18788				0.0124461					0.0124454				0.0118549
1.85047				0.195715					0.274701				0.0122748				0.0124452					0.295993				3.13591					0.389663				1.86578				2.19892					0.0124454				0.0118579
1.13276				1.38392					0.274716				0.0122775				0.0124452					2.61145				0.832252					6.75808				0.483041				0.381292					0.0124454				0.0118621
5.68583				0.0113987					0.274982				0.0122776				0.0124452					2.17145				1.12832					3.33396				2.08533				3.10405					0.0124454				0.0118662
0.524818				0.0124452					0.27594				0.0122804				0.0124452					1.8108				2.84723					1.11832				4.17367				0.111592					0.0124454				0.0118703
3.28007				6.06436					0.276779				0.012283				0.0124452					1.27141				1.53917					1.69608				2.11052				2.72877					0.0124454				0.0118824
4.37792				1.03465					0.277506				0.0122842				0.0124452					1.09799				1.36599					4.20914				1.36656				1.00778					0.0124454				0.011883
1.20841				0.190616					0.277687				0.0122848				0.0124452					0.398077				0.39863					4.84115				1.5128				3.29883					0.0124454				0.0118835
0.153787				2.10667					0.277831				0.0122913				0.0124452					5.98512				0.0109061					1.84822				0.231499				0.299232					0.0124454				0.0118866
0.0124453				1.94144					0.278204				0.0122932				0.0124452					0.567941				0.525236					2.73725				0.470275				0.285136					0.0124454				0.0118913
2.50224				0.872532					0.278868				0.0122967				0.0124452					1.00994				0.99209					0.929552				0.716722				1.47644					0.0124454				0.0118942
10.6556				0.809945					0.279271				0.0123063				0.0124452					1.70538				2.75841					0.287287				2.43429				1.19876					0.0124454				0.0118989
0.0109892				0.190671					0.279431				0.0123177				0.0124452					0.0106963				2.10593					0.795529				0.303137				0.499674					0.0124454				0.0118998
0.362616				0.661903					0.280404				0.0123225				0.0124452					0.529587				7.90904					0.43975				1.26558				0.100342					0.0124454				0.0119009
6.12838				0.780011					0.281234				0.0123229				0.0124452					1.03956				0.429019					3.30401				1.38044				0.838469					0.0124454				0.0119046
2.84531				2.08245					0.281716				0.0123251				0.0124452					0.73593				1.41545					1.54211				0.709049				3.23628					0.0124454				0.0119075
25.1017				1.03907					0.283267				0.0123472				0.0124452					0.20239				3.51945					0.610349				1.92737				1.67789					0.0124454				0.0119128
2.4178				0.310321					0.284352				0.0123475				0.0124452					0.797047				0.48958					0.287266				0.145284				2.61623					0.0124454				0.0119145
1.34079				0.268995					0.28442				0.0123582				0.0124452					2.36258				1.63855					0.627524				0.24827				1.5166					0.0124454				0.0119155
0.0124452				0.0749087					0.284423				0.0123596				0.0124452					0.754739				8.99884					0.392951				0.755166				8.21561					0.0124454				0.0119165
3.15015				0.516475					0.284442				0.012361				0.0124452					1.05456				0.819322					0.871199				1.13681				0.823949					0.0124454				0.0119202
0.0124457				0.0681568					0.284898				0.0123679				0.0124452					0.536663				2.28875					1.62322				0.7485				1.32854					0.0124454				0.0119212
1.67831				4.18557					0.28494				0.0123689				0.0124452					1.44247				1.66868					0.309738				3.27584				3.44839					0.0124454				0.0119261
3.46388				1.52967					0.286201				0.012376				0.0124452					2.44239				0.632986					0.347116				0.95296				3.18154					0.0124454				0.0119294
1.96327				1.88238					0.286731				0.0123768				0.0124452					0.252567				1.3242					1.76179				0.434539				0.419915					0.0124454				0.0119311
9.50461				3.77454					0.286845				0.0123853				0.0124452					0.727423				0.960246					2.11132				0.724665				7.5509					0.0124454				0.0119316
6.19623				4.52487					0.28712				0.0123876				0.0124452					6.05959				0.205968					0.0111619				0.293092				2.96359					0.0124454				0.0119328
3.83429				0.0124461					0.287247				0.0123892				0.0124452					1.44617				1.77915					0.648111				1.18125				0.874475					0.0124454				0.0119339
5.40302				2.9811					0.287548				0.012407				0.0124452					1.63624				0.150013					0.749179				1.81395				11.6156					0.0124454				0.0119358
0.984864				0.0105671					0.288066				0.0124073				0.0124452					0.244882				2.96372					0.343266				1.37863				0.640099					0.0124454				0.0119369
3.50044				0.0124452					0.288106				0.0124137				0.0124452					0.319855				0.742422					0.87899				0.340713				0.0106545					0.0124454				0.0119387
3.0478				0.0124452					0.288171				0.0124143				0.0124452					5.58596				0.297661					1.8108				0.884902				1.67072					0.0124454				0.0119388
3.2768				0.0124459					0.288461				0.0124303				0.0124452					1.4135				0.959168					4.31612				1.115				0.115076					0.0124454				0.0119432
2.94413				0.70805					0.288743				0.0124311				0.0124452					1.01887				2.53379					1.09431				1.52528				0.676595					0.0124454				0.0119483
0.933687				0.0122139					0.288888				0.0124375				0.0124452					0.880642				0.729821					3.50306				0.56387				0.67791					0.0124454				0.0119503
2.64493				1.73252					0.289514				0.0124392				0.0124452					0.679181				1.15421					2.93302				0.194163				1.10314					0.0124454				0.0119545
3.15733				2.60069					0.289669				0.0124422				0.0124452					0.282763				1.71551					2.0093				1.8447				4.83866					0.0124454				0.0119552
0.953311				1.95007					0.290107				0.0124429				0.0124452					0.0124449				2.70283					3.12565				0.813642				0.851667					0.0124454				0.0119563
1.63712				16.4283					0.291101				0.0124439				0.0124452					1.24224				1.47091					0.0124454				1.38578				0.0124452					0.0124454				0.0119648
2.54506				3.83768					0.291382				0.0124439				0.0124452					0.809334				2.06169					0.627917				1.06463				1.41708					0.0124454				0.0119681
1.13239				0.0124452					0.291537				0.0124439				0.0124452					0.869585				1.26231					1.94174				0.928787				0.0124452					0.0124454				0.0119746
3.46115				1.57137					0.291564				0.0124439				0.0124452					3.04941				0.730536					2.80611				1.32415				2.42433					0.0124454				0.0119797
0.374033				1.13386					0.292346				0.0124439				0.0124452					0.992073				1.15839					0.012218				0.991199				5.48372					0.0124454				0.0119871
0.937687				4.42128					0.293306				0.0124444				0.0124453					1.21336				3.93447					3.25166				1.11435				1.39198					0.0124454				0.0119955
11.3761				3.61246					0.293626				0.0124444				0.0124454					4.92402				5.33791					0.768403				0.388085				0.00950452					0.0124454				0.0119956
3.35588				1.13711					0.293692				0.0124446				0.0124454					2.65206				3.45559					7.57585				0.0747577				0.75109					0.0124454				0.0120009
9.7418				0.503604					0.293897				0.0124447				0.0124454					0.487858				0.442797					1.91475				0.971104				6.14684					0.0124454				0.0120019
5.48207				2.29953					0.294086				0.0124449				0.0124454					2.11758				0.728519					1.16269				1.03645				5.96283					0.0124454				0.0120087
6.3871				0.0122776					0.294724				0.0124449				0.0124454					0.67241				1.5491					1.51616				2.25016				0.252186					0.0124455				0.0120132
1.6055				1.27024					0.295023				0.0124449				0.0124454					2.11783				0.0114231					0.0111806				0.878523				0.0111561					0.0124455				0.0120145
1.7818				0.557084					0.295934				0.0124449				0.0124454					2.67346				0.805684					0.851009				1.18487				3.47994					0.0124455				0.012015
1.27742				0.012225					0.296565				0.0124449				0.0124454					0.381745				0.230807					2.16643				1.0434				1.68409					0.0124457				0.0120164
3.80527				1.60536					0.296574				0.0124449				0.0124454					1.13586				1.12078					1.1615				2.31804				1.40939					0.0124457				0.0120174
0.778069				0.0124452					0.296645				0.0124449				0.0124454					0.490848				1.14666					1.49088				1.07237				0.41885					0.0124457				0.0120185
1.52862				1.36849					0.296689				0.0124449				0.0124454					2.34347				0.208109					0.876252				1.67546				1.25916					0.0124457				0.0120233
6.03247				7.70644					0.296888				0.0124449				0.0124454					6.56881				4.2281					0.0124452				0.34104				4.85525					0.0124457				0.0120246
1.40705				0.87312					0.297125				0.0124449				0.0124454					1.71737				3.39753					3.55315				1.22768				4.17856					0.0124457				0.0120249
2.80635				0.249802					0.297325				0.0124449				0.0124454					1.41599				0.328405					1.68282				0.883351				0.0104516					0.0124457				0.0120301
15.9912				0.278292					0.297429				0.0124449				0.0124454					3.5104				0.319681					3.04098				0.0112699				0.953556					0.0124457				0.0120323
1.09715				3.33113					0.297458				0.0124449				0.0124454					1.58671				0.312979					0.494054				0.333667				3.40409					0.0124457				0.0120325
0.968046				0.0101721					0.29777				0.0124449				0.0124454					0.676394				0.338493					0.437384				0.880869				2.19235					0.0124459				0.0120379
3.67155				3.23329					0.297919				0.0124449				0.0124454					1.65325				4.43859					0.530949				0.434551				1.28711					0.0124459				0.0120399
5.86429				2.02787					0.298002				0.0124449				0.0124454					5.37442				0.266494					0.603893				4.71948				0.509432					0.0124459				0.0120422
0.505988				1.14819					0.298232				0.0124449				0.0124454					0.438196				0.129586					1.3933				3.3713				1.16769					0.0124459				0.0120509
7.08614				1.00539					0.298981				0.0124449				0.0124454					0.0102813				0.0124459					5.69762				1.158				1.85037					0.0124459				0.0120556
1.25363				0.0107286					0.298986				0.0124449				0.0124454					1.51771				0.63682					3.23608				0.247253				0.644381					0.0124459				0.0120562
12.7613				1.34633					0.300582				0.0124449				0.0124454					0.960065				0.195159					0.443265				0.584379				1.70455					0.0124459				0.0120574
7.51158				1.24868					0.301003				0.0124449				0.0124454					1.44862				0.425174					0.121405				0.54384				0.177359					0.0124459				0.0120637
4.57908				0.251697					0.301015				0.0124449				0.0124454					0.192036				0.413433					0.518383				0.666494				0.600751					0.0124459				0.0120655
1.10635				2.47065					0.301325				0.0124449				0.0124454					1.54387				3.62277					0.404586				1.30696				1.80152					0.0124459				0.0120658
0.0124452				1.77256					0.301423				0.0124449				0.0124454					0.208047				2.20629					0.312503				3.35998				2.47172					0.0124459				0.0120699
2.42907				4.79079					0.301541				0.0124449				0.0124454					0.380665				1.36033					0.0778461				0.343261				1.54426					0.0124459				0.0120728
1.33744				2.46092					0.3018				0.0124449				0.0124454					1.05778				0.222774					2.31913				3.18117				0.0124461					0.0124459				0.0120733
4.49175				0.323845					0.302416				0.0124449				0.0124454					2.76047				0.861165					0.388495				0.291706				0.506064					0.0124459				0.0120774
3.55621				0.952588					0.303035				0.0124449				0.0124454					1.01312				0.48941					1.38865				0.55087				2.19323					0.0124459				0.012083
0.0124453				0.384508					0.303047				0.0124449				0.0124454					0.0118735				2.43627					5.68327				0.529945				0.58208					0.0124459				0.0120841
3.55769				2.63721					0.303971				0.0124449				0.0124454					1.93472				0.214338					0.893679				0.457143				0.723602					0.0124459				0.0120941
2.26513				1.90885					0.304363				0.0124449				0.0124454					2.55527				0.914298					0.94891				0.298855				1.72294					0.0124461				0.0121032
3.75646				0.0120852					0.304415				0.0124449				0.0124454					1.37309				0.0111496					0.830228				2.2692				0.0124452					0.0124461				0.0121091
2.76428				2.41506					0.304431				0.0124449				0.0124454					1.61864				0.980296					1.35122				0.948777				0.269751					0.0124464				0.0121109
8.62641				1.56486					0.304598				0.0124449				0.0124454					0.652761				1.10249					1.80839				0.325199				3.18933					0.0124464				0.0121118
0.548132				1.23441					0.304732				0.0124449				0.0124454					0.495555				3.46574					0.604379				0.676211				0.648968					0.0124464				0.0121131
1.77773				1.39561					0.305218				0.0124449				0.0124454					1.62046				4.16801					1.08518				0.669219				0.486138					0.0124464				0.0121154
2.04755				1.50071					0.30559				0.0124449				0.0124454					0.296841				0.656641					1.07077				4.15272				1.24067					0.0124464				0.0121173
3.32854				0.462941					0.305608				0.0124449				0.0124454					1.10223				1.73311					1.65101				0.498268				1.26647					0.0124464				0.0121188
1.96977				1.86133					0.306136				0.0124449				0.0124454					0.490185				1.29024					1.41968				1.0129				2.93752					0.0124464				0.0121269
1.10891				0.0097745					0.306839				0.0124449				0.0124454					3.83362				1.12627					0.706145				0.809422				2.15526					0.0124464				0.0121281
6.8761				5.12442					0.307334				0.0124449				0.0124454					0.541982				2.32645					2.57731				1.51217				1.42181					0.0124464				0.0121286
3.82757				0.269715					0.307726				0.0124449				0.0124454					0.41925				1.42795					0.372724				2.35553				1.26228					0.0125328				0.0121294
0.0124452				0.443619					0.30846				0.0124449				0.0124454					0.146999				0.719389					2.4939				0.599188				3.08423					0.0126466				0.0121377
5.8607				3.07231					0.308546				0.0124449				0.0124454					0.170032				0.814303					0.0123699				1.14812				3.31165					0.013061				0.0121419
2.64205				12.926					0.308621				0.0124449				0.0124454					0.305196				3.97525					0.421482				2.22488				0.994989					0.0133515				0.0121467
8.20139				1.03015					0.308845				0.0124449				0.0124454					0.449279				0.249821					2.77934				2.47313				2.00683					0.0146319				0.012147
0.362476				3.55895					0.308984				0.0124449				0.0124454					1.38676				0.743831					0.0666986				0.71921				0.307339					0.0150424				0.0121521
0.305357				1.17015					0.309142				0.0124449				0.0124454					0.179292				0.73204					0.56607				0.561137				9.00543					0.0153033				0.0121532
1.82374				4.87772					0.309383				0.0124449				0.0124455					0.495745				3.14539					0.516472				0.365994				1.54105					0.0154972				0.0121551
1.38592				1.51716					0.309439				0.0124449				0.0124455					2.42463				0.779292					1.00242				2.40145				0.0119997					0.0155641				0.0121554
8.55402				1.01436					0.30947				0.0124449				0.0124456					0.405191				10.2562					2.23337				0.0124449				0.103855					0.0157563				0.0121563
6.98318				0.238787					0.309747				0.0124449				0.0124456					0.84649				1.68056					0.573159				2.82623				0.426428					0.0163508				0.0121598
4.88807				0.571437					0.310122				0.0124449				0.0124457					0.437338				0.172725					0.45338				1.32871				1.46867					0.0167382				0.0121607
5.73055				3.06443					0.310142				0.0124449				0.0124457					0.342712				0.502191					1.40245				1.11901				0.157339					0.0171619				0.0121621
2.20327				0.568526					0.310695				0.0124449				0.0124457					0.530545				3.98042					0.754217				1.69922				0.889756					0.0172516				0.0121661
1.20352				1.61235					0.311876				0.0124449				0.0124457					0.113658				1.15248					1.17142				0.247809				0.536662					0.0182288				0.0121685
3.85667				0.719032					0.311884				0.0124449				0.0124457					2.0057				1.0687					0.639633				3.7671				1.22309					0.0182625				0.0121685
3.10913				2.77953					0.312158				0.0124449				0.0124457					0.174056				2.06472					1.96489				0.650853				0.768983					0.0182756				0.0121777
1.36654				3.3975					0.312432				0.0124449				0.0124457					3.0459				1.70783					2.9412				0.36032				0.0124452					0.0183527				0.0121797
1.61401				1.83197					0.312521				0.0124449				0.0124457					0.978265				1.02933					0.533977				1.12352				2.65194					0.0185873				0.0121827
0.0112349				0.536609					0.312814				0.0124449				0.0124457					1.80248				2.48459					1.27256				0.825558				0.388248					0.0186113				0.0121882
1.52792				0.16344					0.313961				0.0124449				0.0124457					1.3244				7.85388					1.11337				0.106986				0.944248					0.0187425				0.0121891
4.67871				0.256504					0.314502				0.0124449				0.0124457					0.48814				1.52334					0.781343				1.18557				1.61527					0.0196927				0.0121895
0.744615				0.230702					0.314984				0.0124449				0.0124457					0.291845				1.22838					0.942824				0.344226				3.15125					0.0203115				0.0121919
1.87685				0.597122					0.31592				0.0124449				0.0124457					0.100832				0.462068					0.995527				0.736597				1.27321					0.0204446				0.0121922
11.3354				0.239083					0.316394				0.0124449				0.0124457					0.0116109				0.945361					0.772268				0.981275				2.83349					0.0205886				0.0121923
0.0101471				0.896571					0.316661				0.0124449				0.0124457					0.831392				0.646423					0.956158				1.30865				0.0124452					0.0208874				0.0121963
1.82735				1.16951					0.317769				0.0124449				0.0124457					0.0115751				0.344972					0.695315				0.903086				0.530612					0.0214338				0.0121993
2.66223				0.564449					0.31796				0.0124449				0.0124457					3.8092				1.867					0.443949				1.12674				1.88564					0.0222366				0.0122034
4.57796				2.18296					0.318014				0.0124449				0.0124457					0.809029				1.20656					1.92016				1.40161				0.709992					0.0223517				0.0122078
0.49197				2.79625					0.31859				0.0124449				0.0124457					0.279534				0.854562					1.8984				0.294479				1.80909					0.0225913				0.0122082
0.905327				2.24277					0.318981				0.0124449				0.0124457					0.37169				1.83933					0.257096				0.704758				0.306978					0.0225962				0.0122159
1.83244				1.00612					0.319257				0.0124449				0.0124457					0.598714				4.58593					0.0893986				0.124597				0.29214					0.0231583				0.0122173
5.6089				5.20137					0.319311				0.0124449				0.0124457					0.563517				0.630864					0.351546				0.666057				0.331038					0.0235354				0.0122234
1.41491				1.9699					0.319411				0.0124449				0.0124457					0.984085				2.91503					1.56457				0.564769				0.550769					0.0239846				0.0122247
1.07092				0.346477					0.319801				0.0124449				0.0124457					2.24314				0.591371					1.3209				1.46788				0.341421					0.0246842				0.0122252
1.9865				0.506415					0.320061				0.0124449				0.0124457					0.398793				2.12803					1.38465				0.0124459				0.23381					0.0248044				0.0122264
2.01519				0.3648					0.320418				0.0124449				0.0124457					1.41121				0.836848					0.12486				0.137838				0.101141					0.0252115				0.0122269
2.58259				0.53212					0.321069				0.0124449				0.0124457					0.278178				3.97469					0.654233				0.267846				0.0386916					0.0254477				0.0122314
1.37057				1.16196					0.322629				0.0124449				0.0124457					1.97417				0.0834732					8.52813				0.0124449				0.829897					0.0255527				0.0122314
0.88094				2.93685					0.322936				0.0124449				0.0124457					3.36227				0.902061					1.13329				1.01834				1.05805					0.0255735				0.0122323
0.0124455				0.271035					0.323005				0.0124449				0.0124457					1.22378				1.04745					0.0667515				0.237339				0.720775					0.0255981				0.0122375
1.76566				0.143985					0.323118				0.0124449				0.0124457					0.183188				3.78072					0.365054				1.99912				1.42503					0.0256138				0.0122422
3.81412				1.4671					0.32421				0.0124449				0.0124457					0.282551				1.57548					1.49644				8.70452				2.5533					0.0256401				0.0122448
8.68974				0.343253					0.324715				0.0124449				0.0124457					0.131422				2.49365					0.205432				1.7389				5.28683					0.0256619				0.0122454
6.42136				1.30348					0.325505				0.0124449				0.0124459					0.846728				0.0124459					1.67161				7.25755				0.21728					0.0259428				0.0122464
11.1301				0.166553					0.3256				0.0124449				0.0124459					0.284694				3.11999					2.65267				0.741732				0.684184					0.0264475				0.012249
3.44823				0.340637					0.325889				0.0124449				0.0124459					2.85134				4.81859					0.260029				0.775451				0.410297					0.0270618				0.012249
2.31969				0.0086634					0.326132				0.0124449				0.0124459					1.58911				2.5599					0.259279				0.492328				0.26632					0.0270627				0.0122492
0.786023				0.55769					0.326877				0.0124449				0.0124459					1.5121				0.711151					0.524595				1.37111				0.263135					0.0278751				0.0122493
0.694144				0.0611352					0.327294				0.0124449				0.0124459					3.01844				1.49593					1.39498				0.643807				1.72561					0.0279387				0.0122499
0.821347				0.225478					0.32784				0.0124449				0.0124459					3.42849				1.12499					1.51364				0.561237				0.317758					0.0279867				0.0122505
2.65416				0.0124454					0.327924				0.0124449				0.0124459					0.744235				1.46256					0.289014				0.938307				0.800318					0.0282906				0.0122551
3.53951				1.7215					0.328568				0.0124449				0.0124459					1.36996				3.94848					0.0908587				0.884939				0.0101788					0.0284354				0.0122574
0.574609				7.98472					0.328707				0.0124449				0.0124459					4.74205				0.296351					0.207845				0.78418				0.189879					0.0285905				0.0122581
3.40693				3.04753					0.330219				0.0124449				0.0124459					1.28492				6.42307					5.29038				0.266823				2.98173					0.0287084				0.0122588
0.012445				0.899159					0.330645				0.0124449				0.0124459					2.37311				0.292536					0.147907				1.79131				0.558603					0.0288156				0.0122611
3.02383				1.09416					0.330693				0.0124449				0.0124459					1.89537				0.983925					0.0124452				0.858379				0.624119					0.0288872				0.0122636
0.0115871				0.0120603					0.330786				0.0124449				0.0124459					1.82955				0.0109663					1.56405				0.178547				0.21082					0.0297861				0.0122646
6.48995				2.04615					0.331901				0.0124449				0.0124459					1.71976				1.11055					0.681968				0.586579				1.1037					0.0302178				0.0122685
7.995				0.800228					0.332367				0.0124449				0.0124459					0.00992027				0.0118688					0.0101667				0.341538				1.97961					0.0304156				0.0122699
13.1665				2.70478					0.333235				0.0124449				0.0124459					0.677488				0.580847					0.935619				1.28753				1.45075					0.0308277				0.0122701
3.57948				6.43019					0.333259				0.0124449				0.0124459					2.39571				2.03351					0.94876				1.21986				0.409487					0.0312087				0.0122804
11.2559				0.946176					0.33334				0.0124449				0.0124459					0.281803				0.206228					4.24775				0.325467				2.30312					0.0315399				0.01229
21.7556				0.525507					0.333841				0.0124449				0.0124459					0.253447				1.63531					5.43555				0.778336				0.982424					0.0316037				0.0122991
0.012446				1.03063					0.333871				0.0124449				0.0124459					0.697694				0.532062					0.973746				0.978922				1.9903					0.0316475				0.0123008
4.51833				7.45266					0.334009				0.0124449				0.0124459					3.62651				1.90295					0.0124452				1.22815				1.74614					0.0319191				0.0123008
9.81542				3.67521					0.334059				0.0124449				0.0124459					1.82287				0.0124459					0.614628				1.5353				0.65177					0.032013				0.012302
5.34296				0.434376					0.334081				0.0124449				0.0124459					1.37468				3.97816					0.537178				0.677943				7.186					0.0329087				0.0123054
2.62686				1.52936					0.334998				0.0124449				0.0124459					1.98569				0.210381					1.3642				1.16659				1.5645					0.0330726				0.0123072
5.75625				2.93754					0.335061				0.0124449				0.0124459					1.95888				1.46793					0.417412				3.64942				2.11314					0.0330755				0.0123142
0.706049				1.04014					0.33519				0.0124449				0.0124459					0.622826				2.45907					2.36788				0.175585				2.63753					0.0337144				0.012315
9.6346				1.96658					0.335312				0.0124449				0.0124459					1.21826				3.08774					2.07068				0.734604				2.22109					0.0340028				0.0123182
0.996861				1.82095					0.335548				0.0124449				0.0124459					0.577337				2.46409					0.237773				0.567578				0.0772831					0.0343559				0.0123196
9.13884				2.64142					0.335604				0.0124449				0.0124459					0.201463				2.54417					0.26081				0.29566				0.0904721					0.0344391				0.0123211
2.46489				0.447834					0.335773				0.0124449				0.0124459					1.85732				1.35798					1.23682				0.877191				0.36382					0.0349556				0.0123211
3.0302				2.98943					0.335792				0.0124449				0.0124459					1.61859				0.0121491					0.545403				1.60073				0.768274					0.0354871				0.0123214
1.52361				4.05623					0.336505				0.0124449				0.0124459					1.80397				0.189604					1.05648				0.713861				0.393213					0.0360395				0.0123228
4.81407				1.10301					0.336633				0.0124449				0.0124459					2.15462				1.55092					0.693631				0.0114772				1.44104					0.0362259				0.0123258
3.05722				0.66692					0.336732				0.0124449				0.0124459					0.613095				3.22418					1.70457				0.806341				2.27814					0.0362961				0.0123317
10.3645				0.996441					0.336766				0.0124449				0.0124459					1.24071				0.463103					0.699181				1.34284				0.287154					0.0363115				0.012332
2.47656				3.98856					0.337405				0.0124449				0.0124459					2.85202				1.05347					0.897758				2.2626				1.39271					0.0363645				0.0123368
1.08574				1.17143					0.337456				0.0124449				0.0124459					0.877004				1.54563					0.639935				1.75669				0.736591					0.0367766				0.01234
2.01648				0.0121695					0.337566				0.0124449				0.0124459					2.97617				0.700707					2.83988				5.0092				0.185316					0.0369453				0.0123405
3.44181				1.37176					0.337799				0.0124449				0.0124459					0.844394				0.242094					0.331057				0.174635				2.19432					0.0374343				0.0123416
0.0124461				2.69619					0.337896				0.0124449				0.0124459					3.85867				0.163927					0.975953				1.40877				0.265981					0.0377339				0.0123425
1.07809				0.813111					0.338309				0.0124449				0.0124459					0.479698				1.41052					0.0118383				1.32947				1.05799					0.0382488				0.012343
1.74393				0.235625					0.338583				0.0124449				0.0124461					3.42511				0.628052					0.0115721				6.66912				0.763043					0.0383718				0.0123497
1.79745				0.00971626					0.338773				0.0124449				0.0124461					0.317806				3.87907					0.0867362				0.0124449				2.50647					0.0383773				0.0123502
1.66631				0.0115258					0.339176				0.0124449				0.0124461					3.62916				2.39311					0.30172				1.75897				0.557197					0.0383784				0.0123506
4.02738				1.15007					0.339511				0.0124449				0.0124461					1.00003				1.08127					3.91039				1.46536				1.39345					0.0384528				0.0123513
0.396245				0.845894					0.339838				0.0124449				0.0124461					0.694123				0.457333					1.56993				0.972783				0.316448					0.0385234				0.0123541
0.437565				3.53111					0.340049				0.0124449				0.0124461					1.2189				0.651255					5.40872				1.28318				0.129864					0.0387065				0.0123568
2.16365				0.802098					0.340342				0.0124449				0.0124461					3.42167				2.04897					0.658282				0.716538				0.396201					0.0387074				0.0123589
1.34151				1.32233					0.34086				0.0124449				0.0124461					2.04945				0.639173					4.18656				0.411812				1.55368					0.0387461				0.012359
9.07177				0.993567					0.340872				0.0124449				0.0124461					5.47986				0.57077					0.919492				2.51958				0.509366					0.0387992				0.0123617
6.40504				0.460193					0.341277				0.0124449				0.0124461					0.0095389				2.06375					1.96509				0.65492				0.107252					0.0390098				0.0123634
2.6776				2.21928					0.341607				0.0124449				0.0124461					0.842238				0.354184					0.0114967				0.814805				1.89186					0.0394299				0.0123661
2.52776				2.57133					0.341618				0.0124449				0.0124461					0.433089				0.850644					0.427309				1.04938				4.8007					0.0394561				0.0123687
2.58197				0.529043					0.342125				0.0124449				0.0124461					2.21019				0.0124459					0.316386				0.455481				0.388219					0.0395179				0.0123707
7.94643				0.626229					0.342754				0.0124449				0.0124461					0.481177				1.62487					0.89622				1.91259				0.238123					0.039785				0.0123738
6.66682				0.136467					0.343341				0.0124449				0.0124461					0.543129				0.780393					2.69212				0.624603				1.41445					0.0401953				0.012374
2.22548				0.981459					0.343742				0.0124449				0.0124464					1.12396				0.330134					1.9503				0.600298				0.0655197					0.040307				0.0123757
9.42369				2.13382					0.343955				0.0124449				0.0124464					0.0106183				2.28666					0.0479673				0.0124459				0.763775					0.0403605				0.0123762
0.672372				0.600141					0.344122				0.0124449				0.0124464					0.589358				0.562425					1.52549				0.850457				0.526953					0.0403607				0.0123784
2.20933				0.413411					0.344981				0.0124449				0.0124464					2.2168				1.0237					2.48729				0.901802				2.57741					0.0412999				0.0123844
9.37542				1.53488					0.345064				0.0124449				0.0124464					1.21347				0.241833					1.34945				0.49118				0.210649					0.0414338				0.0123854
4.61211				0.342369					0.345388				0.0124449				0.0124464					1.56339				1.04776					0.21512				1.35706				0.158977					0.0414543				0.0123865
9.55188				0.242687					0.346209				0.0124449				0.0124464					0.776493				1.54622					2.02915				1.15662				0.947076					0.041459				0.012391
7.58799				0.606986					0.346476				0.0124449				0.0124464					1.89501				0.3699					0.57411				0.457043				0.658505					0.0416139				0.0123915
5.89742				0.455612					0.346827				0.012445				0.0124464					3.97726				1.35376					4.20616				0.895652				0.297766					0.0427022				0.0123989
1.23235				1.78141					0.347023				0.012445				0.0124469					0.247753				0.0107862					0.286617				1.7515				0.960818					0.0431921				0.012399
2.56877				0.835348					0.347137				0.012445				0.0124469					0.338625				1.42151					0.203132				0.209737				1.50684					0.0432771				0.0124004
2.33746				0.266491					0.347172				0.012445				0.0470981					3.45043				0.137731					1.68644				0.0124449				0.68094					0.0432859				0.0124082
0.409605				0.843451					0.348305				0.012445				0.0482807					2.43258				0.955684					0.0107527				2.30212				3.68667					0.0435897				0.0124102
5.08944				1.39709					0.348949				0.012445				0.0541336					1.76882				1.21993					0.73283				0.49384				0.187669					0.0436315				0.0124149
1.37918				6.02232					0.349381				0.012445				0.0554045					0.746993				1.93821					1.07724				0.852476				0.0113414					0.0437584				0.0124157
13.6047				1.12439					0.349581				0.012445				0.0560694					5.71377				1.05699					5.17249				0.760652				0.288469					0.0439916				0.0124195
1.07432				0.567834					0.349724				0.012445				0.0572503					2.06543				0.737949					0.312488				0.789829				1.2534					0.0445979				0.0124283
1.68456				1.28065					0.350278				0.0124451				0.0581908					2.99852				0.271118					3.68611				0.722392				0.647815					0.0449399				0.01243
0.264062				0.635303					0.351391				0.0124451				0.0593855					1.09374				2.37678					0.894463				2.34963				0.18889					0.045099				0.0124313
5.96344				1.61504					0.351608				0.0124451				0.0596896					0.449259				0.800414					0.279824				0.0124459				0.777911					0.0452064				0.0124335
3.29895				1.2087					0.351725				0.0124451				0.0614316					4.59666				0.367178					0.148266				2.62428				0.0429924					0.0453776				0.0124338
3.32151				0.657805					0.352114				0.0124451				0.0662195					0.421394				0.304263					0.641706				0.132738				0.478464					0.0455504				0.0124341
6.09764				1.79818					0.352146				0.0124452				0.0669911					1.06492				0.36582					1.61431				1.9582				0.151273					0.0455616				0.0124351
0.0103785				0.960928					0.352759				0.0124452				0.0672618					3.14235				1.81306					0.564411				0.285646				4.61665					0.0457155				0.0124359
0.870264				0.167969					0.353166				0.0124452				0.0703226					0.266707				0.351451					2.21222				0.813886				1.13342					0.0457633				0.012437
0.0354784				0.777729					0.353607				0.0124452				0.0710181					0.205118				1.24242					0.566206				2.48602				0.314287					0.0464628				0.0124388
3.24103				0.398651					0.353893				0.0124452				0.0713005					0.946653				4.46439					7.71829				1.16803				0.443386					0.0467153				0.0124401
3.76032				1.2547					0.354268				0.0124452				0.0721809					1.1756				0.5192					0.331657				0.969113				0.205564					0.0476457				0.0124425
10.9389				0.0115196					0.354975				0.0124452				0.0725785					1.6891				0.259557					3.56313				0.0124459				0.223422					0.0482634				0.0124439
5.58557				1.35274					0.356456				0.0124452				0.073372					1.51422				1.37755					0.168962				1.63891				0.307635					0.0483436				0.0124439
19.5904				0.94764					0.356596				0.0124452				0.073617					0.264534				1.47267					0.465145				3.65653				0.355172					0.0492541				0.0124439
5.12716				1.39184					0.356685				0.0124452				0.0737198					0.853753				0.624164					0.757394				0.758495				0.607196					0.0494396				0.0124439
4.64568				0.563817					0.356838				0.0124452				0.0759201					2.82518				0.149241					1.01751				1.09238				7.11965					0.0496844				0.0124439
22.9786				1.53469					0.356875				0.0124452				0.0772231					0.506457				0.430222					6.02614				5.5119				0.0107268					0.0497025				0.0124439
2.64966				2.08132					0.357072				0.0124452				0.0773542					0.557207				1.46602					0.273851				2.74868				0.965237					0.0499879				0.0124439
1.33167				1.46413					0.35741				0.0124452				0.0777088					1.63123				0.310544					0.395039				0.184683				1.60187					0.0501832				0.0124439
1.56523				0.641746					0.357609				0.0124452				0.0778821					0.966682				3.34157					1.79284				1.88876				0.742965					0.0503506				0.0124439
0.60086				0.548219					0.357876				0.0124452				0.0782011					1.73654				0.306416					1.21914				0.665466				0.312338					0.0507739				0.0124439
0.338251				0.183011					0.358259				0.0124452				0.082445					0.20246				0.482496					0.651894				0.365606				0.167019					0.0508585				0.0124443
2.04083				0.404769					0.358608				0.0124452				0.0834402					1.53617				5.42385					0.824506				0.809147				1.2225					0.0514758				0.0124447
0.0124461				0.666709					0.358646				0.0124452				0.0856808					2.33121				0.692587					0.941604				0.355534				0.449208					0.051515				0.0124449
0.012445				1.56597					0.359293				0.0124452				0.0857183					2.53674				0.327708					2.51816				1.68841				0.685254					0.0517847				0.0124449
6.40337				0.454555					0.359549				0.0124452				0.0868136					0.652274				4.45708					0.0115221				1.33798				4.23159					0.0524783				0.0124449
0.0113366				6.63769					0.359933				0.0124452				0.0874963					0.118669				0.609938					0.600816				0.138236				0.0124452					0.0525859				0.0124449
6.25056				2.04237					0.359962				0.0124452				0.0876796					1.11751				0.145233					5.66191				0.0109467				2.21248					0.0526983				0.0124449
7.57917				0.0124464					0.360156				0.0124452				0.0877187					8.01444				1.53705					1.99884				0.971814				10.5093					0.0531732				0.0124449
6.7				1.20831					0.360983				0.0124452				0.0891981					0.557597				0.0104288					0.591879				0.257053				0.109046					0.0535368				0.0124449
4.34303				1.51334					0.360989				0.0124452				0.0893539					2.44576				1.26011					0.486567				0.586226				2.39927					0.0537049				0.0124449
3.67251				3.3026					0.36136				0.0124452				0.0905843					3.36731				2.18815					0.975364				2.58849				0.193773					0.0543293				0.0124449
1.40748				4.6751					0.361436				0.0124452				0.0922417					0.957037				2.041					0.75763				3.48324				7.05599					0.0546013				0.0124449
0.749099				6.77087					0.361703				0.0124452				0.093022					0.209409				0.550547					1.02521				0.698357				0.569261					0.0554131				0.0124449
1.70504				1.18886					0.36205				0.0124452				0.0949029					2.59932				1.40853					0.164394				0.251221				0.194274					0.0558237				0.0124449
2.16039				2.92516					0.362163				0.0124452				0.0966036					0.3971				1.09355					0.0103952				0.456121				0.379666					0.0562457				0.0124449
10.6189				2.6181					0.362835				0.0124452				0.0967405					2.40286				0.389416					0.901212				1.47698				0.267437					0.056251				0.0124449
6.57246				2.53599					0.363224				0.0124452				0.0975069					0.127173				2.03866					0.186417				2.7427				1.12144					0.0564365				0.0124449
8.97905				2.86579					0.363404				0.0124452				0.0976801					0.827679				0.21214					2.08218				1.66016				1.3879					0.056472				0.0124449
6.598				0.682106					0.364029				0.0124452				0.0977066					1.84732				1.25007					3.27096				0.112707				4.89217					0.0565131				0.0124449
0.0124452				0.467151					0.364414				0.0124452				0.099304					0.835157				6.34511					0.593778				0.568435				1.27016					0.0568526				0.0124449
3.55339				0.611393					0.364803				0.0124452				0.0995217					0.258634				0.951133					3.69626				1.35293				2.11021					0.0570226				0.0124449
0.747955				1.24373					0.364954				0.0124452				0.102452					0.231146				0.502617					2.54556				1.82852				1.99902					0.0574954				0.0124449
1.1156				1.92578					0.36537				0.0124452				0.104062					0.37451				0.0789464					1.26821				0.735085				1.25434					0.0576483				0.0124449
0.954594				2.36226					0.365451				0.0124452				0.105881					0.963029				0.426544					2.21428				0.0115513				0.582349					0.0577396				0.0124449
2.11927				1.29832					0.365858				0.0124452				0.106395					0.555967				1.21216					0.0111173				0.0124469				0.370571					0.058247				0.0124449
0.0123459				2.60778					0.365863				0.0124452				0.106618					0.433086				1.70767					0.157321				1.4517				5.96759					0.059243				0.0124449
3.01666				0.989154					0.366559				0.0124452				0.107544					1.34524				3.0151					1.08022				1.52618				0.181182					0.0593996				0.0124449
0.722868				2.56863					0.366667				0.0124452				0.107622					0.0122273				0.438843					0.706633				0.477081				5.10591					0.0595206				0.0124449
0.0124461				0.112363					0.366718				0.0124452				0.108513					0.289155				5.05643					1.01755				1.54769				4.24004					0.0596709				0.0124449
8.29349				0.853798					0.366844				0.0124452				0.108643					1.17389				4.10488					0.0124449				1.11999				0.0124452					0.0599374				0.0124449
2.38317				0.631954					0.367281				0.0124452				0.10891					2.40202				0.334394					2.51906				0.0121275				0.702035					0.0602447				0.0124449
1.00163				1.91097					0.367566				0.0124452				0.109437					0.111588				1.42235					2.67196				3.72384				3.11105					0.0602847				0.0124449
1.4606				5.75723					0.368106				0.0124452				0.111401					2.02387				0.55495					0.0121397				0.011961				0.229046					0.061086				0.0124449
4.70689				1.76388					0.368194				0.0124452				0.111841					0.778741				0.834983					3.05806				4.83235				1.50022					0.0610868				0.0124449
1.23702				0.816336					0.368586				0.0124452				0.11331					1.12905				4.11982					0.887201				0.100017				5.27423					0.0612183				0.0124449
1.07541				0.851817					0.368747				0.0124452				0.113433					0.5341				2.09695					0.563818				0.830371				5.08893					0.061517				0.0124449
0.620969				1.03211					0.369376				0.0124452				0.113934					1.91137				3.78825					0.716701				0.368826				5.94769					0.0621524				0.0124449
0.857749				1.13984					0.369744				0.0124452				0.11484					0.582562				1.07911					1.05746				0.731438				0.280134					0.0621676				0.0124449
4.88192				1.59155					0.369866				0.0124452				0.114874					0.231777				0.973836					0.11702				0.393011				0.0118112					0.0624029				0.0124449
4.61937				0.464229					0.370935				0.0124452				0.115622					0.274139				5.43052					0.835965				1.92545				0.721319					0.0624173				0.0124449
1.72914				2.51919					0.370954				0.0124452				0.116511					0.455117				0.735142					0.486157				0.0101426				0.765113					0.0629434				0.0124449
4.93325				0.30413					0.37124				0.0124452				0.117372					0.381459				0.997487					0.533318				1.79136				0.99628					0.062995				0.0124449
0.012445				0.307394					0.371402				0.0124452				0.117561					0.460333				0.625647					2.0966				0.928625				0.705197					0.0630858				0.0124449
3.90803				0.14292					0.371666				0.0124452				0.117904					2.35639				4.48307					6.0377				1.12915				2.20681					0.0635132				0.0124449
3.56919				0.0115409					0.371748				0.0124452				0.118006					2.32878				1.71484					0.188489				0.476198				1.88344					0.0641645				0.0124449
0.0124461				0.961979					0.372508				0.0124452				0.1211					1.09757				0.932457					0.973452				3.50539				0.731323					0.0651593				0.0124449
0.0124452				1.47961					0.37253				0.0124452				0.122002					0.47823				1.20212					0.195128				1.46463				0.0120133					0.065931				0.0124449
4.33009				1.69199					0.372599				0.0124452				0.122726					0.253744				1.86952					0.0124461				0.0124459				1.46363					0.065971				0.0124449
3.93806				1.19569					0.372819				0.0124452				0.123252					0.365674				2.17323					0.628653				2.20477				2.43672					0.066205				0.0124449
4.77757				0.831496					0.373017				0.0124452				0.123502					1.07666				0.475699					1.32907				0.771136				0.909108					0.0667017				0.0124449
7.97656				1.18278					0.37304				0.0124452				0.124359					0.385214				0.947563					0.116935				2.79744				2.09058					0.0670769				0.0124449
1.42992				0.813764					0.37331				0.0124452				0.125701					2.8363				0.849911					0.0452161				6.29809				1.07221					0.0672601				0.0124449
4.57458				7.22155					0.373567				0.0124452				0.12588					0.945673				3.23703					1.09051				0.362937				4.22894					0.0682754				0.0124449
5.58343				0.527843					0.373657				0.0124452				0.126055					1.79496				4.26762					0.778115				0.0110749				2.08808					0.0684172				0.0124449
1.83152				2.95185					0.373849				0.0124452				0.126687					2.61133				0.503099					0.482745				0.91389				1.34702					0.0684849				0.0124449
3.39979				1.24607					0.374325				0.0124452				0.128599					3.94343				0.465544					2.60819				1.11203				1.16137					0.0691669				0.0124449
5.44783				0.604621					0.37441				0.0124452				0.129861					1.03221				0.448063					0.275324				3.13558				0.905447					0.0693059				0.0124449
2.28689				0.431974					0.374447				0.0124452				0.129897					0.856556				4.56904					0.260407				0.159466				0.631333					0.0694675				0.0124449
0.0124452				1.39373					0.374767				0.0124452				0.13014					0.39497				0.306708					0.955852				0.532802				0.0111601					0.0694753				0.0124449
9.23151				0.675984					0.375036				0.0124452				0.130203					0.316398				1.40779					0.310236				0.590553				0.0104422					0.0694761				0.0124449
7.26573				1.4934					0.37516				0.0124452				0.130336					2.01925				1.24758					0.164366				0.0839942				0.665545					0.0695378				0.0124449
9.43719				1.25512					0.375423				0.0124452				0.130805					0.613283				0.937872					4.77793				2.56181				0.620808					0.0695879				0.0124449
15.8179				0.984242					0.375496				0.0124452				0.130825					1.51792				1.27699					1.192				1.16324				0.878449					0.0699073				0.0124449
4.31197				0.454876					0.375655				0.0124452				0.13128					1.26174				0.193405					0.584114				0.688904				2.27411					0.0700317				0.0124449
0.363902				3.66931					0.375829				0.0124452				0.131571					0.777312				3.238					2.2285				1.83979				0.361048					0.0702473				0.0124449
3.79405				0.294218					0.375968				0.0124452				0.13159					1.82642				4.36255					0.589263				0.82151				0.240858					0.0703143				0.0124449
1.2032				0.898698					0.376014				0.0124452				0.132048					1.06419				1.29244					1.61397				0.0113544				0.543576					0.070488				0.0124449
3.31149				0.621672					0.376314				0.0124452				0.132071					0.166228				1.02895					0.904502				2.38921				0.64561					0.0705636				0.0124449
4.96257				1.10397					0.376933				0.0124452				0.133108					1.13274				1.67205					1.50928				1.64173				4.85862					0.0705715				0.0124449
0.55913				2.31988					0.376997				0.0124452				0.133694					0.98857				0.710474					4.18307				0.385338				1.01324					0.0710571				0.0124449
0.252511				3.15893					0.377023				0.0124452				0.133917					1.1352				2.72636					1.79496				0.405941				2.51675					0.0710612				0.0124449
0.509715				14.145					0.377065				0.0124452				0.134708					1.74053				4.37857					0.418463				0.011797				0.329143					0.0714032				0.0124449
1.22353				0.0109148					0.377672				0.0124452				0.135624					1.5182				0.493062					2.35706				0.93383				0.329344					0.0719576				0.0124449
1.34275				0.709543					0.377736				0.0124452				0.136459					0.457241				0.468762					0.505175				2.49595				8.77153					0.0720118				0.0124449
0.691214				0.692716					0.378499				0.0124452				0.136503					1.94602				2.35746					0.257429				0.283036				0.357276					0.0722778				0.0124449
2.76752				0.185502					0.378641				0.0124452				0.136581					1.23816				1.24468					2.332				1.18127				0.747028					0.0725084				0.0124449
0.519888				1.52521					0.379679				0.0124452				0.13674					0.00979798				5.07688					0.273349				1.24649				2.19749					0.0725392				0.0124449
1.36556				1.54113					0.379737				0.0124452				0.137149					1.21072				2.38635					0.198064				0.625598				1.65442					0.0730119				0.0124449
2.41051				1.34081					0.379867				0.0124452				0.1374					2.46437				0.882941					0.768114				0.22735				1.2689					0.0731593				0.0124449
1.29083				1.4457					0.380282				0.0124452				0.137641					0.0124459				0.55012					1.22057				5.58038				2.56513					0.0732181				0.0124449
0.466603				0.589459					0.380356				0.0124452				0.138072					1.35251				2.41196					0.0113045				0.330528				0.257314					0.0738525				0.0124449
0.0115781				0.182865					0.380399				0.0124452				0.138912					2.68382				3.00208					0.51167				0.0124459				1.19313					0.0743364				0.0124449
0.235179				0.287545					0.380567				0.0124452				0.139357					1.85466				0.755647					1.19434				0.68006				0.234102					0.0747044				0.0124449
1.84418				2.67469					0.380693				0.0124452				0.140107					2.42335				0.980958					1.68373				0.579971				5.51597					0.0751899				0.0124449
1.24767				0.567737					0.380717				0.0124452				0.140262					2.26396				1.63493					2.89569				0.676773				4.13356					0.0755374				0.0124449
3.61128				0.663945					0.381125				0.0124452				0.140303					0.709451				1.39542					3.19332				0.223348				4.45829					0.0755872				0.0124449
3.04348				0.0116548					0.38145				0.0124452				0.140444					2.06001				7.38867					0.0111328				0.887108				1.17157					0.0756955				0.0124449
6.59446				1.81562					0.381557				0.0124452				0.140944					3.84639				3.9977					0.753934				1.81438				1.58851					0.0764605				0.0124449
0.891498				2.14147					0.381723				0.0124452				0.141021					6.09822				1.56847					1.14697				0.266049				0.620096					0.0766822				0.0124449
1.98482				2.63478					0.382112				0.0124452				0.141428					0.706059				0.344442					1.05015				1.26357				1.82513					0.0767619				0.0124449
2.30348				0.641225					0.382304				0.0124452				0.141773					1.34374				1.90229					1.03293				0.668318				1.36858					0.0770603				0.0124449
1.17369				1.34824					0.382479				0.0124452				0.142553					0.248011				3.11919					0.85734				1.07821				0.900434					0.0781833				0.0124449
0.682766				0.717754					0.382788				0.0124452				0.14435					0.595004				1.49189					0.602573				0.377144				1.93468					0.0782942				0.0124449
3.25926				0.535936					0.382806				0.0124452				0.146998					1.71155				1.25616					2.57365				1.44349				0.658732					0.0783279				0.0124449
1.00029				6.73175					0.383561				0.0124452				0.147151					1.79053				1.06898					1.37061				0.299413				0.471052					0.0785659				0.0124449
0.603033				0.832345					0.384019				0.0124452				0.147219					0.0124449				0.887161					1.35324				0.959577				3.09647					0.0796789				0.0124449
1.42561				0.887313					0.384331				0.0124452				0.147238					2.32398				1.79991					1.15284				2.36464				0.0124461					0.0796947				0.0124449
0.661316				0.829805					0.384598				0.0124452				0.147601					1.62636				0.010873					0.748653				0.0121553				0.531088					0.0802708				0.0124449
4.67938				0.792466					0.384635				0.0124452				0.148039					1.35862				0.0109985					1.39394				0.800032				0.67811					0.0802971				0.0124449
14.6364				0.856242					0.384788				0.0124452				0.148272					2.13341				0.668291					0.807071				0.268104				4.09797					0.0805008				0.0124449
1.19402				0.4545					0.38487				0.0124452				0.148888					3.4964				2.38844					0.521428				1.58955				0.012184					0.081353				0.0124449
1.76498				0.497821					0.384896				0.0124452				0.149858					0.799609				0.00979013					2.03253				0.196911				0.405582					0.081577				0.0124449
1.67988				0.414904					0.385552				0.0124452				0.150513					0.734175				1.97173					2.06336				0.42124				0.427476					0.0817932				0.0124449
1.30982				3.7032					0.385681				0.0124452				0.150522					0.703668				3.44885					0.287198				0.844652				4.18377					0.0818004				0.0124449
5.49168				0.460292					0.385732				0.0124452				0.150942					1.95369				2.974					1.05316				0.660051				3.52243					0.0821559				0.0124449
2.18752				1.32484					0.387165				0.0124452				0.151266					1.45506				4.39925					0.22431				0.482109				0.0117702					0.0824359				0.0124449
5.51131				4.32984					0.38811				0.0124452				0.151701					0.382525				0.0119022					0.296229				0.753251				3.97848					0.0830672				0.0124449
1.29305				2.23905					0.388302				0.0124452				0.15213					0.874505				0.831252					2.88068				0.197323				4.35934					0.0836288				0.0124449
2.41627				5.73154					0.388471				0.0124452				0.152188					0.955253				4.85858					3.25114				0.394085				2.88406					0.0836625				0.0124449
2.39263				1.76036					0.388533				0.0124452				0.152751					1.33438				0.542399					1.31437				2.66174				0.912493					0.0837887				0.0124449
1.11292				0.41344					0.388687				0.0124452				0.153036					1.5544				1.13266					5.52513				0.924564				0.0108621					0.0838379				0.0124449
2.46783				3.84706					0.388703				0.0124452				0.153351					0.632642				0.174059					0.640229				0.153529				0.987339					0.0845683				0.0124449
6.24088				4.03473					0.388825				0.0124452				0.153785					0.958924				0.706439					2.42895				0.584506				1.02909					0.0848091				0.0124449
1.12691				2.7725					0.388866				0.0124452				0.15385					2.39436				1.75654					0.453982				0.0108914				1.47006					0.0855954				0.0124449
0.822864				1.76481					0.389105				0.0124452				0.154402					1.02109				0.542184					1.01781				0.342205				0.910008					0.0858025				0.0124449
2.82323				0.394953					0.389733				0.0124452				0.154599					0.37148				0.301737					0.62522				0.823471				0.0288698					0.0861135				0.0124449
0.256536				1.58648					0.389801				0.0124452				0.154636					1.24868				0.414561					2.83817				0.375084				1.89156					0.0861322				0.0124449
0.759994				0.864944					0.389823				0.0124452				0.155023					2.95267				0.824638					1.3504				2.44802				0.561837					0.0867906				0.0124449
2.54158				0.561528					0.390295				0.0124452				0.15573					0.247985				5.64516					0.211152				0.204089				1.0949					0.0870009				0.0124449
1.3511				1.41852					0.391085				0.0124452				0.155884					0.308428				2.81239					0.977685				0.537987				0.406032					0.0874686				0.0124449
1.35554				1.04181					0.391791				0.0124452				0.156039					3.26761				2.45406					0.480948				2.27937				1.58596					0.0875503				0.0124449
1.36117				0.153306					0.392023				0.0124452				0.156062					0.289284				3.35038					1.30755				1.09519				0.375029					0.0875635				0.0124449
0.685471				0.0681963					0.392084				0.0124452				0.157079					0.68877				1.30953					1.9678				0.536868				1.66669					0.0876522				0.0124449
5.51911				0.0850122					0.392292				0.0124452				0.157253					0.2326				2.77867					0.518338				2.41688				1.25123					0.0878997				0.0124449
4.48798				3.75754					0.39255				0.0124452				0.157986					0.439396				1.32944					0.337265				0.462262				1.36544					0.0879992				0.0124449
21.4205				3.89328					0.393373				0.0124452				0.158698					0.78244				2.82618					1.04007				0.94522				0.0110613					0.0881604				0.0124449
5.19661				8.02455					0.393557				0.0124452				0.158769					1.99734				3.89047					1.47007				0.37368				0.29928					0.0885616				0.0124449
2.56507				0.967289					0.394686				0.0124452				0.159643					1.85402				5.42994					0.586621				0.786183				0.0124452					0.0891776				0.0124449
5.03712				0.956225					0.395579				0.0124452				0.160192					0.817029				3.25909					2.53869				0.342864				0.316022					0.0893904				0.0124449
0.0124452				2.21164					0.395621				0.0124452				0.16099					0.507538				1.82876					1.23681				6.5319				4.36192					0.0893986				0.0124449
2.33242				0.264974					0.395645				0.0124452				0.161558					1.0148				1.4661					7.26534				0.315828				0.330007					0.0894263				0.0124449
0.948562				2.18016					0.396326				0.0124452				0.161722					2.60681				1.59968					3.02302				1.23936				1.68697					0.0896335				0.0124449
1.62453				1.87629					0.396675				0.0124452				0.161883					0.185474				0.263694					0.283881				0.893059				4.54183					0.089647				0.0124449
2.38374				0.288347					0.396718				0.0124452				0.162137					0.344541				4.79982					0.474811				0.076259				0.35289					0.0897125				0.0124449
1.05752				2.20992					0.397071				0.0124452				0.162512					1.53641				0.730279					1.44803				1.06119				0.465022					0.089815				0.0124449
2.26697				0.466011					0.398222				0.0124452				0.162541					1.43062				3.18991					1.43966				0.572472				0.869293					0.0900176				0.0124449
0.76694				0.23021					0.398531				0.0124452				0.163246					2.44479				4.27398					0.0473019				1.28231				0.931612					0.090428				0.0124449
0.0124454				0.205291					0.398776				0.0124452				0.163279					0.908781				1.3443					0.0124461				10.1279				0.949492					0.0906918				0.0124449
3.58118				0.642514					0.399445				0.0124452				0.163412					1.11134				1.56998					0.400648				1.11394				0.00875671					0.0909159				0.0124449
4.9401				0.728602					0.399642				0.0124452				0.163465					0.199317				0.381327					4.05721				1.0052				1.09691					0.0909776				0.0124449
0.97944				0.558657					0.399672				0.0124452				0.163625					0.560648				0.93462					1.45531				1.18509				2.31793					0.0914124				0.0124449
1.15796				0.690879					0.399782				0.0124452				0.163627					0.878573				2.45847					2.2607				2.96497				2.28537					0.091455				0.0124449
6.62918				1.23375					0.400039				0.0124452				0.164172					0.764217				0.878267					1.53289				1.27737				1.13731					0.0914845				0.0124449
4.7777				5.81061					0.400103				0.0124452				0.164797					1.34407				1.81645					0.557179				0.883688				0.306057					0.0915475				0.0124449
2.84089				2.74364					0.400194				0.0124452				0.165258					0.737445				2.01605					0.182312				0.790885				0.466136					0.0915808				0.0124449
4.5565				1.95118					0.400287				0.0124452				0.165507					0.553839				0.233095					0.479228				1.21804				1.3197					0.0916801				0.0124449
6.44401				3.4387					0.400941				0.0124452				0.166077					0.816912				3.92768					0.789401				0.0584943				0.261021					0.0919915				0.0124449
1.19743				0.522765					0.401019				0.0124452				0.166927					0.346777				0.0124449					0.290319				0.477719				1.27484					0.092051				0.0124449
3.08125				2.35082					0.401101				0.0124452				0.167148					1.57208				0.271608					1.05195				0.218834				0.295557					0.092441				0.0124449
10.6422				0.958672					0.401321				0.0124452				0.167162					1.33797				4.30975					1.87432				0.197117				0.44094					0.0928958				0.0124449
5.34103				0.935758					0.401829				0.0124452				0.16763					0.0761494				2.21046					0.544281				1.43437				1.42007					0.0931811				0.0124449
3.71473				2.78214					0.401855				0.0124452				0.168167					2.27514				0.739187					1.07987				0.731137				0.502842					0.0931936				0.0124449
6.58661				1.5138					0.402868				0.0124452				0.168445					0.421999				0.829007					2.21989				0.0124459				0.838036					0.0937569				0.0124449
2.35277				2.04052					0.403236				0.0124452				0.169035					1.93535				4.42631					1.76729				0.429257				1.28255					0.0939612				0.0124449
1.44367				2.03184					0.403632				0.0124452				0.169371					1.47492				1.28701					1.62726				0.650553				0.314983					0.0942415				0.0124449
0.58835				0.355089					0.404382				0.0124452				0.169493					1.70145				2.75261					0.651967				0.483913				0.386437					0.0943675				0.0124449
0.0120405				4.4208					0.40482				0.0124452				0.169579					3.7518				0.010305					5.41351				1.72092				0.625356					0.0944202				0.0124449
1.96592				0.0111069					0.40497				0.0124452				0.169622					0.705722				1.0603					0.413059				0.170729				0.447693					0.0948905				0.0124449
1.61573				1.81354					0.405014				0.0124452				0.170112					0.479491				5.33638					0.0118969				0.20661				1.70133					0.0954966				0.0124449
0.578285				0.411713					0.405055				0.0124452				0.170214					0.632663				5.20739					2.98288				0.804082				0.334322					0.0955846				0.0124449
1.2398				3.71792					0.405447				0.0124452				0.170281					1.06649				0.768093					1.17192				0.463279				1.72833					0.0956983				0.0124449
6.17395				4.66026					0.405513				0.0124452				0.171857					2.56454				1.22076					0.191998				0.0124449				0.218324					0.0961283				0.0124449
2.35709				5.68678					0.406609				0.0124452				0.172314					0.84831				2.53871					2.17227				1.17762				0.832279					0.0963083				0.0124449
8.0644				0.533457					0.406669				0.0124452				0.172474					1.61866				2.41444					0.493871				0.907781				1.4811					0.0971394				0.0124449
3.78487				1.85421					0.406896				0.0124452				0.173231					0.542646				2.98499					1.66109				0.0124469				1.40275					0.097585				0.0124449
4.86669				2.18771					0.406926				0.0124452				0.173439					1.19728				0.991239					4.46991				0.424427				0.376038					0.0977655				0.0124449
1.31349				2.40831					0.407601				0.0124452				0.174435					0.874359				2.48494					0.944212				0.137607				0.334335					0.098225				0.0124449
2.54402				3.85395					0.407875				0.0124452				0.174469					2.76189				3.62705					1.50308				1.0906				0.182364					0.0985503				0.0124449
1.63504				2.4908					0.408038				0.0124452				0.174796					0.96087				0.546904					0.151522				0.63138				1.46725					0.0985943				0.0124449
3.17151				4.76393					0.408112				0.0124452				0.175366					0.872144				1.58082					0.900364				1.7053				2.23187					0.0989569				0.0124449
1.20532				0.36326					0.408194				0.0124453				0.175541					0.757721				0.563694					3.28316				3.19				3.23435					0.0995534				0.0124449
2.9146				1.71483					0.408338				0.0124453				0.175662					2.91822				1.88099					4.8564				0.161461				0.31809					0.0998955				0.0124449
1.24233				1.35109					0.408612				0.0124453				0.176154					0.368857				4.76698					0.971735				4.75406				0.174704					0.0999263				0.0124449
0.235762				3.75353					0.408663				0.0124454				0.176299					2.06644				1.79574					4.4434				0.626224				0.267244					0.100243				0.0124449
1.45555				2.08805					0.409045				0.0124454				0.176919					1.60037				0.0104868					0.0445759				0.187042				0.124405					0.100555				0.0124449
1.233				2.08192					0.40935				0.0124454				0.177179					2.08496				1.47149					4.85967				0.635397				1.1842					0.100647				0.0124449
0.970251				0.920188					0.409431				0.0124454				0.177702					0.853779				0.0113498					1.35651				0.2666				0.0835544					0.10075				0.0124449
5.8102				1.07728					0.409517				0.0124454				0.178633					3.40136				1.25655					1.51614				2.99096				0.657639					0.101657				0.0124449
5.31687				0.524603					0.409879				0.0124454				0.179441					1.26038				0.316027					0.0113807				1.71306				1.11658					0.101972				0.0124449
1.45411				1.33572					0.409976				0.0124454				0.18023					0.888274				1.39479					1.49145				0.403486				0.767041					0.102407				0.0124449
1.26179				0.209668					0.410352				0.0124454				0.180907					0.687817				0.959629					3.64028				0.0101966				1.41885					0.102815				0.0124449
2.0668				0.0124449					0.410428				0.0124454				0.181042					0.619917				1.32114					0.998244				2.95713				1.39835					0.102947				0.0124449
3.36926				0.2466					0.410621				0.0124454				0.181854					0.0458995				0.16675					1.43694				3.18335				2.45621					0.10305				0.0124449
0.47676				2.5838					0.410936				0.0124454				0.181944					0.745111				1.3803					1.30063				0.521809				0.314409					0.103134				0.0124449
4.83585				2.57589					0.411195				0.0124454				0.18209					0.536806				0.158862					0.0124452				10.9509				1.35466					0.103595				0.0124449
2.25397				3.41177					0.411756				0.0124454				0.182999					2.12452				0.698974					1.2645				0.914543				0.117639					0.103997				0.0124449
0.71494				0.351234					0.411875				0.0124454				0.183143					0.686337				3.20762					5.97209				0.601331				0.52449					0.104338				0.0124449
1.5908				5.30447					0.41199				0.0124454				0.18325					0.399764				0.010789					0.0124449				0.495759				0.431525					0.104382				0.0124449
2.29543				1.02806					0.412199				0.0124454				0.184031					0.799748				0.666502					2.79194				2.42237				0.66328					0.104405				0.0124449
1.54285				1.20397					0.412551				0.0124454				0.184792					0.820526				1.173					0.0113764				0.344429				2.18769					0.104451				0.0124449
0.593288				1.13396					0.412651				0.0124454				0.185462					1.33692				1.06277					1.02868				1.97943				0.808812					0.104472				0.0124449
0.705781				2.2198					0.412851				0.0124454				0.185568					0.473572				2.73312					1.96176				3.00772				1.34557					0.104889				0.0124449
0.961175				0.615589					0.412875				0.0124454				0.185823					0.573317				4.96753					1.49996				1.93721				0.0124452					0.104898				0.0124449
0.450656				3.80561					0.412964				0.0124454				0.185911					0.582182				2.51957					0.0632962				0.0740887				0.358077					0.105786				0.0124449
1.02334				0.0120839					0.4136				0.0124454				0.186518					0.646031				0.360948					0.0119391				2.58547				0.0119052					0.105826				0.0124449
0.0124452				0.530738					0.413745				0.0124454				0.187574					0.699614				1.2021					2.08045				0.216806				0.72083					0.105829				0.0124449
4.36311				0.25944					0.414973				0.0124454				0.187662					0.559751				0.359477					17.398				1.20833				0.930539					0.105939				0.0124449
1.47001				1.08568					0.41538				0.0124454				0.187782					1.05068				2.86801					0.148963				5.99861				0.335048					0.106223				0.0124449
1.50818				1.06795					0.415737				0.0124454				0.18802					0.502088				0.774159					0.184406				0.57262				2.22359					0.106526				0.0124449
0.497717				0.94648					0.416298				0.0124454				0.188266					0.695162				0.0112298					0.417709				3.70862				0.678977					0.106778				0.0124449
4.25617				0.340521					0.416307				0.0124454				0.189982					0.981308				0.226958					0.0124461				0.0124449				1.57					0.107261				0.0124449
1.08459				2.08897					0.416557				0.0124454				0.19038					1.16844				0.739072					2.56793				1.47755				0.197355					0.107374				0.0124449
0.0124455				1.38638					0.416757				0.0124454				0.190507					1.5975				4.64007					0.00992539				0.670604				0.199258					0.108024				0.0124449
2.15965				0.539553					0.416825				0.0124454				0.190691					1.86916				0.621246					0.0113208				2.49189				3.22476					0.108681				0.0124449
11.4459				0.77936					0.416879				0.0124454				0.191003					1.33933				0.531406					0.780082				0.887345				0.299553					0.109958				0.0124449
2.05612				0.0107071					0.416978				0.0124454				0.192015					1.422				0.127481					0.0124447				1.20136				0.275881					0.110152				0.0124449
6.99938				2.87803					0.417147				0.0124454				0.192076					1.2768				1.58712					0.936739				1.14774				1.19324					0.110206				0.0124449
1.44325				3.8453					0.41788				0.0124454				0.19287					3.95933				0.617441					0.894701				0.30347				0.0124452					0.110278				0.0124449
2.28356				1.76818					0.418071				0.0124454				0.193058					0.947549				0.545193					0.0096321				1.2704				0.0124461					0.110494				0.0124449
0.767853				0.909398					0.418733				0.0124454				0.194189					8.6212				1.25365					1.59648				0.867032				0.724301					0.110552				0.0124449
1.348				5.11519					0.419209				0.0124454				0.195011					7.18019				0.653892					0.192443				3.06449				0.374062					0.111836				0.0124449
7.45226				1.35204					0.419876				0.0124454				0.195038					0.559623				0.854001					0.0116508				0.626997				0.882345					0.112278				0.0124449
5.69306				4.45308					0.420123				0.0124454				0.195245					1.21624				0.866617					0.963071				0.424746				2.34094					0.112975				0.0124449
8.95217				0.313682					0.420578				0.0124454				0.195402					0.404805				1.17937					0.741068				1.70884				2.28901					0.112998				0.0124449
3.6234				1.48042					0.420669				0.0124454				0.195599					1.36892				2.82343					0.0124454				1.82132				0.511188					0.113037				0.0124449
1.67443				1.21449					0.421047				0.0124454				0.195851					2.32857				0.869832					3.04839				2.20634				1.1282					0.114412				0.0124449
1.79789				0.0732361					0.421183				0.0124454				0.195886					0.524053				1.32056					2.18548				0.674347				1.46068					0.11469				0.0124449
4.31314				0.996192					0.421703				0.0124454				0.197183					1.56965				0.344688					0.355929				0.998079				1.53206					0.115303				0.0124449
3.99712				0.273618					0.421797				0.0124454				0.1975					1.4746				0.782182					0.0124452				0.130494				1.17936					0.115433				0.0124449
2.83541				0.911746					0.421813				0.0124454				0.197946					0.997431				1.45783					2.58603				1.06792				0.358209					0.115523				0.0124449
1.47959				1.23504					0.421889				0.0124454				0.199344					0.738118				0.0124449					0.167676				1.15064				0.0124452					0.115823				0.0124449
2.43232				2.12341					0.422388				0.0124454				0.200306					0.229379				4.44219					0.184252				0.627773				8.97082					0.116294				0.0124449
0.0122809				1.48463					0.422445				0.0124454				0.201044					0.703176				0.130479					0.0102652				2.47408				0.312442					0.11682				0.0124449
1.35641				2.29838					0.422539				0.0124454				0.20178					3.08985				1.25602					1.54051				4.483				0.298538					0.116927				0.0124449
2.62172				0.901078					0.422553				0.0124454				0.201852					2.92791				0.935655					2.54741				0.0124449				0.492523					0.117277				0.0124449
0.540771				0.884113					0.422921				0.0124454				0.201898					0.508509				2.53875					0.326715				0.987456				4.44062					0.11733				0.0124449
1.16496				4.81174					0.422937				0.0124454				0.201995					1.00192				0.329755					0.175591				4.94099				0.228497					0.117503				0.0124449
3.31972				1.05247					0.423383				0.0124454				0.202636					0.506556				1.04436					0.358384				3.12871				0.541478					0.117591				0.0124449
5.50012				1.33014					0.423558				0.0124454				0.203245					1.00084				1.12248					1.17209				1.3443				2.3918					0.117604				0.0124449
3.37359				1.91232					0.423772				0.0124454				0.203293					1.29683				1.36807					2.79192				0.0119655				1.09867					0.11817				0.0124449
2.29612				1.57824					0.423846				0.0124454				0.203733					1.67392				0.680234					0.108253				1.85282				1.65559					0.118411				0.0124449
3.73987				6.93394					0.423951				0.0124454				0.204154					0.282899				2.43981					0.0113977				0.776566				0.193611					0.118419				0.0124449
1.58708				0.0506817					0.423973				0.0124454				0.204387					0.0112946				1.39122					0.637093				0.108232				0.827807					0.118488				0.0124449
2.74503				0.0110125					0.42421				0.0124454				0.204437					0.149763				1.42239					2.90968				1.55626				0.617663					0.118665				0.0124449
4.28973				0.00956731					0.424272				0.0124454				0.204897					2.69775				2.65172					2.33051				0.73636				0.00992584					0.118673				0.0124449
1.75348				0.350426					0.424437				0.0124454				0.205018					0.0118816				0.344434					2.13917				0.587017				0.502275					0.118894				0.0124449
0.0124213				4.00826					0.424691				0.0124454				0.205029					1.22988				4.62767					0.235097				0.694918				3.36226					0.119007				0.0124449
2.37791				1.23329					0.425139				0.0124454				0.206081					2.46341				1.7558					0.0124449				0.0124449				1.15284					0.119418				0.0124449
3.33774				0.656644					0.425567				0.0124454				0.206336					0.605042				0.671207					0.71765				0.741322				2.88965					0.120391				0.0124449
5.15633				3.69121					0.42613				0.0124454				0.20667					0.55541				0.383079					1.41061				0.00973152				0.958822					0.120587				0.0124449
1.70374				4.69457					0.426148				0.0124454				0.207023					1.16466				1.28694					4.60668				0.3914				1.65049					0.120617				0.0124449
5.49248				0.499265					0.426258				0.0124454				0.207655					2.47049				1.38973					0.0124449				0.0124449				0.151023					0.120697				0.0124449
3.98071				1.32913					0.427071				0.0124454				0.207899					3.16424				0.685923					0.0122217				0.0124449				1.76201					0.120776				0.0124449
0.582356				1.9855					0.427317				0.0124454				0.208945					2.6528				0.549518					0.336				0.129395				4.1145					0.121425				0.0124449
5.13743				0.148432					0.427595				0.0124454				0.209109					1.02265				0.454808					0.879521				0.694671				0.317418					0.121497				0.0124449
5.53926				1.10487					0.427884				0.0124454				0.209147					1.89256				0.667503					1.45105				2.23634				3.49056					0.121551				0.0124449
7.94182				1.94195					0.429106				0.0124454				0.209228					1.51424				0.531792					1.31137				1.73446				0.0122123					0.121579				0.0124449
3.68145				1.24201					0.429454				0.0124454				0.209365					1.6471				0.718422					3.63657				0.818887				2.92973					0.121754				0.0124449
2.94028				0.785347					0.429973				0.0124454				0.209687					2.74891				2.50417					0.0123656				0.549466				0.110577					0.122246				0.0124449
3.72386				0.595565					0.430218				0.0124454				0.209906					0.209002				1.1755					0.677542				0.674518				0.9999					0.122281				0.0124449
2.34149				0.234915					0.430502				0.0124454				0.21002					1.74362				0.383602					0.0124464				4.04556				2.49091					0.122808				0.0124449
1.00076				2.15355					0.4308				0.0124454				0.21105					1.2326				2.21409					0.441527				2.88924				2.89283					0.123036				0.0124449
0.499032				0.779737					0.430961				0.0124454				0.211075					1.88773				0.225476					2.06504				0.398414				1.12311					0.12304				0.0124449
0.0124452				2.52381					0.430977				0.0124454				0.2111					2.72269				0.324919					0.0114328				2.79056				2.08144					0.123562				0.0124449
0.011762				0.213953					0.431089				0.0124454				0.211556					13.4316				3.34382					0.595941				1.36185				2.06806					0.123682				0.0124449
3.53022				0.80249					0.431729				0.0124454				0.212424					2.1036				0.0115731					3.10815				2.30926				2.71569					0.123817				0.0124449
3.15731				0.298741					0.431752				0.0124454				0.212629					0.817483				2.20328					1.18245				0.969973				3.34205					0.123854				0.0124449
0.873614				1.75992					0.431805				0.0124454				0.212876					0.653594				1.79347					3.65225				0.205846				3.09871					0.12415				0.0124449
5.83463				1.26917					0.431979				0.0124454				0.213223					2.99467				0.0117317					1.14481				2.01664				0.653675					0.124186				0.0124449
9.3497				0.52533					0.432003				0.0124454				0.214003					1.41412				3.7757					0.241526				1.41222				0.457492					0.124279				0.0124449
1.71525				1.45037					0.432084				0.0124454				0.21402					4.08182				1.65257					0.419697				0.838603				0.809461					0.12441				0.0124449
4.26669				1.89893					0.432143				0.0124454				0.214229					1.98355				2.47751					0.0113681				0.44601				0.944819					0.124593				0.0124449
6.90566				1.30632					0.43239				0.0124454				0.215524					1.18398				0.720893					0.118839				1.17924				0.274004					0.124598				0.0124449
4.29939				0.375245					0.432817				0.0124454				0.215849					1.52294				1.21069					2.9368				0.316055				0.145051					0.12465				0.0124449
5.50437				1.08806					0.433182				0.0124454				0.21627					0.0124459				1.12059					0.0691969				1.45133				1.70021					0.124931				0.0124449
5.00766				5.46154					0.433238				0.0124454				0.21643					1.24781				0.0115663					4.98971				0.29632				2.54907					0.127054				0.0124449
3.44073				2.0969					0.433239				0.0124454				0.216602					0.146434				0.708627					0.988115				0.784567				0.378444					0.127275				0.0124449
2.79788				0.392419					0.433738				0.0124454				0.217026					4.36709				0.644469					0.993844				1.90249				0.621095					0.127457				0.0124449
6.93953				0.891947					0.433784				0.0124454				0.217303					1.07655				2.99177					0.650959				0.491552				0.205604					0.127773				0.0124449
3.05892				1.47679					0.433886				0.0124454				0.217313					1.31573				2.85412					0.0124454				1.53886				1.50004					0.127971				0.0124449
3.35936				0.392842					0.434808				0.0124454				0.217316					0.449855				1.93499					0.934171				3.98047				0.593147					0.129127				0.0124449
1.42778				1.30069					0.435219				0.0124454				0.21784					1.71868				0.697608					1.01852				0.49695				2.56499					0.129165				0.0124449
5.87061				0.0108651					0.435299				0.0124454				0.218172					0.441054				2.22122					1.37464				2.44956				0.605076					0.12964				0.0124449
0.647397				1.06644					0.436191				0.0124455				0.21819					0.757395				0.71779					1.44928				1.26907				2.08567					0.130109				0.0124449
0.705979				2.23822					0.436978				0.0124457				0.218295					0.771643				0.43686					0.329279				0.834388				0.0124461					0.130191				0.0124449
3.7081				0.565814					0.437508				0.0124457				0.218579					1.43235				0.604026					0.212828				1.29569				0.75794					0.130453				0.0124449
3.16279				0.0882271					0.437512				0.0124457				0.218855					4.09124				3.40124					0.484856				1.37669				0.0107379					0.130476				0.0124449
1.86369				1.70196					0.437567				0.0124457				0.219888					0.341604				0.781252					0.215114				0.67681				4.11936					0.1307				0.0124449
3.57151				5.21885					0.437896				0.0124457				0.220078					1.69089				0.673295					2.39316				0.633765				3.3609					0.13105				0.0124449
0.0124457				3.21845					0.438598				0.0124457				0.220566					0.802062				0.876815					6.55392				0.542622				0.0090503					0.131282				0.0124449
2.48642				4.94226					0.438683				0.0124457				0.220622					0.139364				0.891666					0.0124452				4.01784				0.709251					0.131416				0.0124449
0.483533				2.31837					0.438757				0.0124457				0.220892					2.03706				0.695622					0.498824				0.207517				0.378148					0.131578				0.0124449
8.73297				1.32849					0.439343				0.0124457				0.221022					0.242925				0.958937					0.372415				2.2437				0.404898					0.131762				0.0124449
0.770998				0.618065					0.439731				0.0124457				0.221437					2.96239				2.18724					2.287				0.917921				0.611475					0.131916				0.0124449
0.0121241				2.27271					0.439875				0.0124457				0.221926					1.95823				1.27491					2.37173				0.982894				0.325516					0.131991				0.0124449
3.74637				0.34296					0.440445				0.0124457				0.222365					2.70418				0.960796					1.809				2.41599				2.15232					0.132437				0.0124449
10.6356				0.662344					0.440452				0.0124457				0.222438					0.855441				2.87722					8.71151				1.16366				2.8047					0.13272				0.0124449
3.43084				0.480122					0.440709				0.0124457				0.222691					1.06088				2.67729					2.53031				2.03815				0.309597					0.133606				0.0124449
1.07345				2.41536					0.440898				0.0124457				0.222815					1.14565				6.48122					2.24185				0.500453				0.30635					0.133663				0.0124449
1.41466				1.76777					0.440905				0.0124457				0.223161					0.676212				1.60253					0.720175				0.672606				0.985953					0.133807				0.0124449
1.90739				4.98861					0.441149				0.0124457				0.22341					0.0124459				0.468746					0.0124452				0.723358				5.43412					0.133867				0.0124449
0.0120296				1.37088					0.441196				0.0124457				0.22347					0.403631				1.82739					4.0051				2.16292				2.09166					0.134127				0.0124449
2.98354				0.649645					0.441453				0.0124457				0.22356					1.28664				3.90432					0.286363				0.543261				0.522453					0.134298				0.0124449
15.3309				2.09656					0.441712				0.0124457				0.223975					0.797956				2.92305					0.14655				0.0124125				1.17916					0.134464				0.0124449
2.81933				0.573858					0.442268				0.0124457				0.224086					0.648829				2.72955					0.475845				2.58677				1.15761					0.134603				0.0124449
2.82327				5.72779					0.442722				0.0124457				0.224322					2.26897				0.779021					0.148038				1.18793				0.010964					0.134697				0.0124449
2.12081				2.03976					0.442757				0.0124457				0.224407					1.20423				1.1926					3.00438				0.581039				0.601987					0.134844				0.0124449
0.901133				0.906106					0.443008				0.0124457				0.225209					0.0124459				1.8262					0.376473				1.69684				0.0124452					0.13504				0.0124449
5.25275				5.02829					0.443191				0.0124457				0.225281					2.70126				1.10424					0.496285				0.264715				1.66376					0.135147				0.0124449
0.597817				1.55666					0.443308				0.0124457				0.226317					6.27958				2.07152					0.706229				0.987936				0.205077					0.135212				0.0124449
3.38895				2.79876					0.443498				0.0124457				0.22645					0.513734				2.96799					0.161754				3.33475				0.567408					0.135242				0.0124449
7.42132				1.1551					0.444255				0.0124457				0.226518					5.8037				1.29146					1.62874				1.45669				2.8138					0.135461				0.0124449
1.06123				1.72637					0.444627				0.0124457				0.226619					0.247404				0.290183					0.170857				1.77714				0.483581					0.135468				0.0124449
2.60679				2.22602					0.444695				0.0124457				0.226754					0.598814				0.246545					0.402558				4.71793				1.86524					0.135772				0.0124449
9.36297				0.442319					0.445178				0.0124457				0.226782					2.90948				0.653723					3.64803				0.881965				0.830087					0.135854				0.0124449
2.25869				0.521207					0.445289				0.0124457				0.226786					0.735247				1.31553					1.54973				4.57905				0.840165					0.135997				0.0124449
2.08632				2.14435					0.445357				0.0124457				0.226833					0.832581				1.77895					2.49959				0.314013				2.83571					0.136009				0.0124449
0.753769				0.01132					0.445721				0.0124457				0.22754					4.51215				3.11611					1.7412				1.90551				0.288382					0.136386				0.0124449
2.97334				0.403211					0.445792				0.0124457				0.227891					0.368999				0.525621					1.65622				0.0787859				2.7097					0.136669				0.0124449
0.0117504				0.19288					0.446247				0.0124457				0.22824					0.104247				0.183856					1.94036				0.0124459				0.603592					0.136775				0.0124449
0.0124453				1.17605					0.446253				0.0124459				0.228262					0.309367				0.102749					0.571549				4.2316				0.758273					0.137283				0.0124449
6.57635				1.80919					0.446686				0.0124459				0.228276					0.503873				1.66256					0.0124452				0.896223				0.531738					0.137317				0.0124449
2.60107				0.358057					0.446711				0.0124459				0.228384					0.258862				1.40042					1.94831				1.61438				1.03726					0.13741				0.0124449
2.00596				0.00990643					0.446785				0.0124459				0.22848					2.10706				1.35893					0.0114784				1.10608				0.290376					0.138489				0.0124449
2.03619				0.105777					0.447166				0.0124459				0.228659					0.221924				2.03079					0.662963				15.7275				0.0443681					0.138531				0.0124449
3.25465				3.43422					0.447183				0.0124459				0.228804					1.91687				0.163072					0.318996				0.16097				1.261					0.138604				0.0124449
0.011644				0.143531					0.44753				0.0124459				0.22891					0.165587				5.17151					1.0025				0.880478				0.85536					0.138824				0.0124449
2.08103				3.93755					0.448166				0.0124459				0.228923					1.55338				1.05642					0.614723				1.32012				0.304133					0.138921				0.0124449
3.0344				0.719079					0.448226				0.0124459				0.229268					1.73527				0.648486					0.331201				0.716323				0.623279					0.138969				0.0124449
1.18689				0.371217					0.44839				0.0124459				0.229481					1.73888				6.14411					1.26069				1.24619				0.454112					0.13904				0.0124449
9.85246				0.0839269					0.448975				0.0124459				0.229534					0.965709				0.119583					1.68988				3.02264				1.40885					0.13905				0.0124449
2.06007				3.11525					0.449703				0.0124459				0.229541					1.19536				0.422732					0.957344				0.385888				0.700499					0.139355				0.0124449
3.87398				0.316598					0.449716				0.0124459				0.229554					0.930316				0.789027					2.6508				1.24762				2.22277					0.139452				0.0124449
0.655042				0.336624					0.450058				0.0124459				0.229639					2.28685				0.931497					3.33975				2.41418				0.448398					0.139475				0.0124449
3.80097				0.236744					0.450212				0.0124459				0.229702					0.614869				0.84036					0.115083				3.91709				0.288684					0.139608				0.0124449
11.8636				1.49446					0.450377				0.0124459				0.22977					0.232147				1.40149					1.28827				0.508375				0.662228					0.139847				0.0124449
1.15019				0.011726					0.450509				0.0124459				0.229959					2.32122				0.0114781					2.68589				0.460865				0.425292					0.140387				0.0124449
2.46529				0.0101181					0.450622				0.0124459				0.230067					1.11044				0.973944					1.3848				1.36445				1.37476					0.140389				0.0124449
0.0124452				1.70891					0.451084				0.0124459				0.230723					1.11042				0.443149					2.16837				0.155904				1.86141					0.140392				0.0124449
2.37435				0.49036					0.451569				0.0124459				0.230874					1.94618				0.315044					0.0111878				0.71301				0.202812					0.140401				0.0124449
1.9				5.00736					0.452254				0.0124459				0.230944					0.810529				1.04148					1.06228				1.95412				2.97327					0.140468				0.0124449
6.02253				1.78893					0.452333				0.0124459				0.231461					0.0108919				0.970877					1.44585				0.190041				1.32914					0.140746				0.0124449
1.15202				4.20395					0.452868				0.0124459				0.231558					0.109536				0.998115					6.02843				0.336237				0.38968					0.140827				0.0124449
8.3934				1.81147					0.453095				0.0124459				0.232049					1.16312				5.94505					2.15776				1.0019				1.83774					0.14084				0.0124449
9.23575				1.89017					0.453956				0.0124459				0.232066					2.15835				1.11672					0.973196				0.0124469				0.489287					0.141175				0.0124449
7.06164				0.267124					0.453975				0.0124459				0.232302					0.928558				1.39133					0.370647				0.404895				3.07689					0.141214				0.0124449
6.81676				0.116272					0.454588				0.0124459				0.232461					0.625299				0.0122612					0.871175				1.91498				0.677993					0.141409				0.0124449
7.29908				0.0109843					0.454849				0.0124459				0.233245					0.0109074				1.07212					1.67598				1.9674				1.26913					0.141556				0.0124449
3.72226				4.83829					0.454868				0.0124459				0.233893					1.09993				1.31135					2.12082				5.82362				1.17483					0.141865				0.0124449
1.29524				0.435897					0.455242				0.0124459				0.23405					0.376938				3.31792					0.506427				1.20273				0.380492					0.142122				0.0124449
1.14463				1.32663					0.455808				0.0124459				0.234602					1.68932				0.841353					1.54239				0.705069				1.66034					0.142355				0.0124449
1.6531				0.46487					0.455841				0.0124459				0.234941					1.52653				3.49266					1.00184				2.42555				1.53526					0.142411				0.0124449
5.45581				0.315985					0.455963				0.0124459				0.234964					1.74624				0.428178					0.764992				1.24438				0.816153					0.14324				0.0124449
0.864061				3.07914					0.456178				0.0124459				0.235435					0.949759				0.305051					1.01831				0.882335				2.83353					0.143624				0.0124449
1.46186				1.84609					0.456442				0.0124459				0.235505					1.18274				3.38898					3.95371				0.0124459				0.00994317					0.144056				0.0124449
0.809465				0.932975					0.456608				0.0124459				0.235654					1.36911				2.37114					3.52536				0.0124459				1.04993					0.144403				0.0124449
2.91804				1.99832					0.456737				0.0124459				0.235828					0.28043				0.879252					0.349122				1.17417				0.583467					0.14448				0.0124449
1.51187				1.10902					0.456758				0.0124459				0.236046					1.16331				3.15707					0.743546				0.799511				1.23951					0.144848				0.0124449
7.11643				0.738767					0.456942				0.0124459				0.23648					2.21264				1.29149					0.300169				0.412215				2.22309					0.145088				0.0124449
9.33395				0.389597					0.456969				0.0124459				0.236583					8.46182				2.0412					0.485561				0.0124449				0.0104967					0.145315				0.0124449
0.0124452				0.816079					0.457437				0.0124459				0.236974					3.60918				0.780872					1.00859				2.92459				0.464562					0.145369				0.0124449
5.92047				2.52673					0.45748				0.0124459				0.237014					0.592702				0.283108					0.563957				1.26098				0.535368					0.145378				0.0124449
6.07149				0.200337					0.457494				0.0124459				0.237227					5.00867				1.68827					0.248069				2.9758				0.463346					0.145438				0.0124449
2.28697				3.73844					0.45788				0.0124459				0.237429					0.335854				0.75771					2.03388				2.07601				2.09119					0.145533				0.0124449
1.74471				0.321687					0.458019				0.0124459				0.23786					5.13237				0.893248					0.0114086				0.855396				0.639868					0.146262				0.0124449
8.29839				1.31348					0.458072				0.0124459				0.238389					0.996519				2.61519					0.830464				1.35819				0.120098					0.146713				0.0124449
2.46612				0.62986					0.459487				0.0124459				0.239115					1.4076				2.30223					0.777681				1.02601				0.784118					0.147132				0.0124449
1.14533				0.691047					0.459578				0.0124459				0.23929					0.0124449				2.47901					1.57669				0.0124459				3.89205					0.147233				0.0124449
0.434601				2.56403					0.460254				0.0124459				0.239577					2.22486				1.28165					0.0124452				0.475319				1.32566					0.147342				0.0124449
2.01737				0.0833184					0.460275				0.0124459				0.239584					0.118463				0.484745					4.80038				2.44698				7.17816					0.14735				0.0124449
0.493964				0.733753					0.460509				0.0124459				0.239775					0.297316				0.0113396					1.93249				0.621655				2.77266					0.147407				0.0124449
5.86053				4.98973					0.461133				0.0124459				0.239984					2.22795				1.19799					0.683744				5.39953				1.34575					0.147523				0.0124449
2.0766				1.4042					0.461336				0.0124459				0.240136					1.75417				2.22454					0.215959				0.0124449				2.38707					0.148064				0.0124449
1.16892				1.30484					0.461623				0.0124459				0.240146					1.59011				0.977931					1.06154				0.0120791				1.74753					0.14821				0.0124449
8.52829				0.337558					0.461923				0.0124459				0.240245					2.85611				0.661151					3.10096				0.668991				0.0762485					0.148934				0.0124449
3.09415				0.174753					0.462076				0.0124459				0.240353					0.62465				0.0124454					0.759848				1.47476				2.16278					0.149027				0.0124449
2.10089				2.533					0.462266				0.0124459				0.24065					2.97216				0.915764					0.875883				0.0124449				0.0124452					0.149058				0.0124449
4.85001				1.08874					0.462272				0.0124459				0.240989					2.41578				1.20477					0.716667				0.224631				1.86232					0.149146				0.0124449
5.08785				0.251119					0.462327				0.0124459				0.241364					0.687526				3.63375					8.55963				1.55961				0.0124452					0.149344				0.0124449
0.0124454				0.977092					0.462644				0.0124459				0.241503					0.626502				1.04994					0.0110811				1.52299				1.78749					0.149622				0.0124449
0.605787				0.0101946					0.462719				0.0124459				0.241885					0.116213				0.87131					0.139655				1.11335				0.304081					0.149667				0.0124449
4.30633				0.212875					0.463274				0.0124459				0.241886					1.83334				0.36738					0.00788776				2.03795				0.26674					0.150883				0.012445
0.851101				0.974876					0.464225				0.0124459				0.242101					0.8565				1.34503					3.38278				1.2406				2.81112					0.150919				0.012445
2.8211				0.00961534					0.464359				0.0124459				0.242175					0.0113155				1.31238					1.84707				2.26362				11.3522					0.151006				0.012445
2.02942				0.14325					0.464564				0.0124459				0.242264					2.16663				0.246664					3.67184				0.234846				0.316187					0.151338				0.012445
2.3708				2.23555					0.464829				0.0124459				0.242635					0.169207				1.07461					1.41231				0.0124449				0.590033					0.151427				0.012445
0.322217				3.95308					0.465265				0.0124459				0.242682					0.891816				3.54022					0.588697				1.832				5.11766					0.151516				0.012445
7.04585				2.90451					0.465582				0.0124459				0.243261					0.888437				1.67449					3.89103				0.487902				1.01942					0.151531				0.012445
1.33142				0.011539					0.465674				0.0124459				0.243487					1.19487				0.841951					0.790205				1.46441				1.72521					0.151614				0.012445
4.63137				0.952295					0.465776				0.0124459				0.244169					0.399455				1.05076					1.79666				2.97927				0.0754525					0.151862				0.012445
8.83009				0.0115118					0.465895				0.0124459				0.244607					0.768533				4.25213					7.72065				1.65786				0.182729					0.151979				0.012445
2.46736				1.18922					0.466366				0.0124459				0.245132					0.716583				0.83707					1.57481				2.43064				0.0124461					0.152204				0.012445
0.850789				1.93693					0.466549				0.0124459				0.245759					0.0118817				0.351769					0.0124452				3.43757				0.212633					0.152354				0.0124451
2.87618				2.20601					0.467111				0.0124459				0.245929					0.996347				1.8921					0.482696				1.06088				1.03602					0.1526				0.0124451
2.64676				1.78579					0.467462				0.012446				0.246316					2.11362				1.28165					0.373431				0.935174				1.35295					0.153208				0.0124451
1.41901				0.159124					0.467499				0.012446				0.246536					7.38544				1.40256					0.2467				0.176452				6.47258					0.153526				0.0124451
1.24488				0.787107					0.468162				0.012446				0.247077					0.552686				0.952405					2.84825				1.45183				0.643653					0.153697				0.0124451
1.31609				2.24057					0.468509				0.012446				0.247407					0.0124449				6.37896					4.88522				0.789397				0.260649					0.154332				0.0124451
4.81795				1.13033					0.468596				0.0124461				0.247939					0.51321				0.93765					0.330875				2.79659				0.702086					0.154582				0.0124451
1.68393				0.0591269					0.468621				0.0124461				0.248353					0.472398				0.388756					3.29713				1.35847				0.918344					0.154596				0.0124451
3.5752				1.79134					0.468656				0.0124461				0.248416					2.11057				3.41099					0.521608				1.03436				0.142873					0.154916				0.0124451
2.90024				1.25407					0.468832				0.0124461				0.248504					3.39138				1.78778					0.0117601				0.789167				0.323845					0.155047				0.0124451
0.763346				2.26136					0.469119				0.0124461				0.248799					2.14407				0.802963					3.6536				3.79598				0.0124461					0.155283				0.0124451
1.87552				1.11579					0.469735				0.0124461				0.249314					0.671688				1.56667					6.1706				1.99043				0.152857					0.155344				0.0124451
0.0115015				9.25491					0.46995				0.0124461				0.249389					0.170897				1.61146					0.135646				4.56019				0.897958					0.155447				0.0124452
0.421519				3.00254					0.470702				0.0124461				0.249574					1.58834				0.722418					0.283638				2.3742				1.88112					0.155704				0.0124452
1.20045				0.0124449					0.47085				0.0124461				0.249849					0.774346				0.597526					1.77171				0.56458				1.78351					0.155811				0.0124452
0.0124454				5.0556					0.470903				0.0124461				0.250472					1.79164				1.16749					0.479088				3.08305				0.60676					0.155895				0.0124452
0.0124454				0.745533					0.471015				0.0124461				0.250854					1.47167				2.44668					2.12235				0.414567				0.882742					0.15636				0.0124452
2.56609				0.0117235					0.471197				0.0124461				0.25089					1.54344				2.60503					1.28957				0.500792				0.0124294					0.156463				0.0124452
1.27305				0.117944					0.471346				0.0124461				0.251008					0.475182				0.131052					0.73765				3.3371				1.1884					0.156741				0.0124452
6.7495				0.946345					0.47142				0.0124461				0.25103					0.721599				2.64119					0.0495916				0.727661				0.586616					0.156962				0.0124452
1.79769				1.44466					0.471722				0.0124461				0.251183					0.76654				3.16842					1.61259				1.79902				5.30007					0.157086				0.0124452
5.42847				0.628019					0.471767				0.0124461				0.251545					0.91329				3.11305					4.87821				2.20545				2.08255					0.157092				0.0124452
4.78898				3.40669					0.472333				0.0124461				0.251551					0.547526				4.316					0.985976				2.64529				0.479364					0.157134				0.0124452
1.72325				0.254368					0.472521				0.0124461				0.251666					0.0993421				0.369393					3.17198				3.44861				0.752754					0.157958				0.0124452
0.0124453				4.7862					0.472572				0.0124461				0.251782					0.900748				1.47179					0.590262				2.65505				0.0427974					0.15808				0.0124452
0.0124454				3.86824					0.47268				0.0124461				0.25185					2.18498				2.0631					2.40308				1.59908				0.0112794					0.158421				0.0124452
9.30857				0.526842					0.47278				0.0124461				0.252426					1.26903				1.30539					1.30262				0.0124459				1.09929					0.158669				0.0124452
4.61154				2.78245					0.472841				0.0124461				0.252443					0.287875				2.61591					1.76784				0.448796				1.45921					0.159159				0.0124452
0.906317				2.30986					0.472983				0.0124461				0.252929					0.00981583				3.97219					0.524793				0.541744				0.636407					0.159366				0.0124452
7.75705				3.53033					0.473047				0.0124461				0.25331					2.11876				0.601324					0.0816799				1.65669				1.62487					0.15951				0.0124452
6.67919				2.74424					0.473308				0.0124461				0.253387					1.87908				1.76424					0.0108354				0.30537				0.875388					0.160044				0.0124452
1.77013				0.502639					0.473526				0.0124461				0.253785					1.61983				0.406564					0.024596				1.87332				0.456801					0.160077				0.0124452
2.74179				3.50121					0.473585				0.0124461				0.253997					0.139741				0.0123889					0.599832				3.83389				0.796651					0.160544				0.0124452
1.20857				0.913182					0.473698				0.0124461				0.254142					1.01431				0.494096					2.78436				1.06034				0.109247					0.160669				0.0124452
0.358089				0.215848					0.473795				0.0124461				0.254318					1.2413				1.51202					0.35385				3.82495				0.688074					0.160789				0.0124452
2.13405				2.29617					0.474028				0.0124461				0.254503					2.11967				0.745322					0.310175				1.39208				0.0801135					0.160835				0.0124452
2.41942				2.57354					0.47428				0.0124461				0.254571					1.46841				0.58413					0.635376				0.0113191				2.05951					0.161111				0.0124452
4.24854				2.98847					0.474915				0.0124461				0.254692					0.851432				2.5878					1.50625				0.858557				0.636041					0.161252				0.0124452
4.27834				0.727702					0.475303				0.0124461				0.254805					0.878446				0.268543					3.04953				0.0124449				0.614833					0.161796				0.0124452
2.32755				2.57798					0.475815				0.0124461				0.254995					0.346342				0.294769					5.24574				0.435196				0.010378					0.161872				0.0124452
1.24427				0.701957					0.476117				0.0124461				0.255282					0.94808				3.49188					0.321969				1.92001				0.551148					0.161899				0.0124452
2.69343				3.77406					0.47629				0.0124461				0.255612					0.368403				2.32477					3.26602				1.36039				1.1298					0.162067				0.0124452
0.520599				3.33032					0.477151				0.0124461				0.256049					0.581659				1.44771					1.55859				0.348085				0.415173					0.162774				0.0124452
2.85229				0.67358					0.477177				0.0124461				0.256174					2.70972				5.97922					0.783429				2.92248				1.34184					0.163122				0.0124452
0.430298				3.57888					0.477332				0.0124461				0.256295					0.854513				0.729271					1.0105				0.0109247				1.21654					0.163452				0.0124452
1.84356				3.90512					0.477431				0.0124461				0.256485					1.00285				1.58426					0.68207				2.82448				1.06601					0.163479				0.0124452
2.00908				1.04234					0.478085				0.0124464				0.256624					2.24569				1.47253					0.97168				2.08143				0.800567					0.1639				0.0124452
1.33963				0.820624					0.478583				0.0124464				0.257134					0.354785				0.57993					0.9477				0.271157				0.6985					0.164969				0.0124452
0.602953				0.164222					0.478995				0.0124464				0.257593					0.924991				1.43589					1.23087				0.0124449				1.74212					0.164994				0.0124452
0.782345				2.07329					0.479041				0.0124464				0.257634					0.695575				2.17731					0.731875				2.23433				0.342207					0.166952				0.0124452
0.581464				1.52885					0.479364				0.0124464				0.257763					0.812242				0.687438					0.0124452				0.0114515				1.63489					0.167218				0.0124452
1.00824				0.241549					0.479387				0.0124464				0.257835					1.38335				2.59518					0.554505				2.45431				0.297333					0.167408				0.0124452
0.432623				0.722329					0.479451				0.0124464				0.258548					1.12454				0.885033					2.71861				0.505793				0.0850161					0.167857				0.0124452
0.266759				1.70851					0.47984				0.0124464				0.258557					1.46043				2.16038					0.77125				0.734573				0.752047					0.167902				0.0124452
1.65314				4.17371					0.479886				0.0124464				0.258921					0.788215				0.0109795					3.99671				1.8055				0.755114					0.168024				0.0124452
4.91683				6.01877					0.480005				0.0124464				0.258974					0.806493				1.79125					1.24219				1.87157				1.19643					0.168234				0.0124452
3.32596				1.85919					0.480022				0.0124464				0.259451					1.95623				2.14025					0.414436				1.84293				2.48716					0.16838				0.0124452
0.0124452				0.807208					0.48033				0.0124464				0.259464					0.122259				0.986552					0.413665				1.28429				3.70456					0.168431				0.0124452
1.62942				1.07681					0.480576				0.0124464				0.259614					0.620619				1.51413					0.636077				2.25142				2.42591					0.168452				0.0124452
4.1605				2.02122					0.480704				0.0124469				0.260253					2.70495				1.16223					1.13474				1.57543				1.56383					0.16865				0.0124452
4.36833				2.45032					0.480892				0.0124469				0.261152					1.36475				0.0104566					1.77372				0.640109				0.88135					0.168676				0.0124452
0.406102				2.76185					0.482071				0.0124469				0.26236					0.413253				1.23443					1.1881				0.340706				0.455866					0.169003				0.0124452
10.2105				0.758972					0.482093				0.0124469				0.26259					3.4554				1.11486					0.322895				3.17747				3.84452					0.169217				0.0124452
6.76389				1.44488					0.482323				0.0124469				0.262824					1.74059				0.764989					3.90478				1.74125				1.1483					0.169874				0.0124452
0.269377				0.626618					0.482327				0.0124469				0.263642					0.12453				0.877077					0.911085				1.31184				1.12806					0.169892				0.0124452
6.53245				1.82313					0.482343				0.0124469				0.26385					0.819799				3.98406					0.36304				0.854002				0.206878					0.16997				0.0124452
1.9291				1.40941					0.482365				0.0124469				0.264201					1.71181				1.2137					0.497753				0.589415				1.00918					0.170011				0.0124452
6.006				0.295319					0.48265				0.0124633				0.26482					0.237982				0.0111779					1.01025				0.478833				0.492274					0.17002				0.0124452
2.10923				3.21886					0.483842				0.0136421				0.264939					3.3205				1.04524					1.21918				0.0124449				0.46375					0.170368				0.0124452
0.0124452				0.0810376					0.48398				0.0239453				0.265587					1.35111				0.851798					1.96762				0.352867				0.743238					0.170708				0.0124452
3.41482				1.33222					0.484541				0.0250229				0.26596					0.20282				2.63165					0.737379				0.0124449				0.371193					0.171259				0.0124452
2.85928				1.14304					0.484802				0.0258152				0.266618					0.739197				0.625571					0.0118584				2.67094				0.358682					0.171803				0.0124452
3.61585				0.52037					0.484826				0.0268888				0.266703					0.295809				5.71899					9.91889				1.95361				0.0111845					0.17209				0.0124452
7.05205				0.149214					0.486179				0.0279156				0.266939					0.296811				2.16346					1.41657				0.695727				1.93543					0.17215				0.0124452
1.66444				3.19004					0.486197				0.0279173				0.267796					0.379297				0.804405					0.341441				0.363843				0.735903					0.172188				0.0124452
0.67469				0.00980258					0.48661				0.0280005				0.267827					1.89834				3.60289					0.446607				0.732269				0.484791					0.172369				0.0124452
0.599998				0.23766					0.486971				0.0313341				0.268292					0.15509				1.97653					0.40602				4.79696				0.306382					0.172468				0.0124452
2.6365				0.617008					0.487771				0.0314949				0.268901					0.791433				0.308208					1.48317				1.72397				1.51802					0.172486				0.0124452
1.32149				0.0116597					0.488096				0.0329453				0.269347					2.27745				3.45131					2.95968				0.995896				0.436842					0.172524				0.0124452
7.59172				2.13741					0.48814				0.0329808				0.269773					2.26537				3.75419					1.05734				0.299339				0.915946					0.173475				0.0124452
10.0124				1.99559					0.488793				0.0336455				0.26985					0.292894				0.610575					2.01196				2.1391				1.59865					0.173641				0.0124452
2.98514				0.154948					0.48923				0.0344919				0.271281					1.43576				0.800448					2.12048				1.9466				0.490577					0.173691				0.0124452
5.25419				4.4713					0.489933				0.0358076				0.272059					1.51716				0.68761					1.72488				0.579875				0.635269					0.173929				0.0124452
1.12044				0.734784					0.490129				0.0358895				0.273265					0.251359				1.1889					0.576729				0.281301				4.65061					0.174192				0.0124452
0.294367				0.297156					0.490249				0.0364066				0.273435					0.269892				2.16451					0.999248				1.63249				0.807335					0.174369				0.0124452
20.1581				0.534431					0.490347				0.038679				0.27457					0.932828				0.862827					0.30935				2.35999				1.21938					0.174579				0.0124452
2.2931				1.0165					0.490487				0.0398763				0.275327					1.93426				0.0703684					0.182447				3.36193				0.885453					0.174823				0.0124452
12.6746				1.7553					0.490497				0.0410989				0.275434					0.5375				2.40687					0.253833				2.40538				1.25248					0.175067				0.0124452
6.10464				3.85715					0.490708				0.0414764				0.276133					0.77964				0.410522					0.606002				0.914471				0.325949					0.175398				0.0124452
0.125536				1.25031					0.491039				0.0417602				0.277038					1.38351				1.57631					2.57904				0.967023				1.80851					0.175426				0.0124452
0.45095				2.85414					0.49287				0.0424603				0.27731					0.356424				0.808422					2.28064				0.412098				0.341054					0.175589				0.0124452
0.0124452				2.59195					0.49291				0.0425003				0.277961					0.670645				1.35014					1.21742				0.541937				0.913123					0.175697				0.0124452
1.64437				0.369766					0.49343				0.0439045				0.278177					0.128527				0.45633					0.762937				1.64612				1.31468					0.175878				0.0124452
2.71356				0.671988					0.493663				0.0450799				0.278213					0.551145				1.71536					0.903101				1.16566				0.010286					0.175952				0.0124452
1.34917				3.19008					0.494164				0.0455566				0.278415					5.14369				1.10975					1.62944				1.2064				1.93179					0.176093				0.0124452
0.326153				3.72275					0.494199				0.0458712				0.278718					0.0124454				0.26312					0.504908				3.20855				1.14263					0.17697				0.0124452
1.35227				1.30934					0.494347				0.046553				0.279305					0.716802				0.0120632					1.57132				1.39277				1.13921					0.178017				0.0124452
4.56444				1.31324					0.494391				0.047642				0.279343					2.68739				1.79075					0.0115492				0.0106383				0.462691					0.178112				0.0124452
1.37956				0.955656					0.494936				0.0485483				0.279696					1.38401				1.03422					0.749651				1.3659				2.36046					0.178494				0.0124452
5.27288				2.17893					0.495049				0.0486237				0.279761					1.42813				2.59965					0.435939				1.57388				0.956268					0.179295				0.0124452
0.836256				0.557793					0.495118				0.0486796				0.279956					1.82863				1.75646					0.454379				1.21422				0.485959					0.179431				0.0124452
0.477333				6.16862					0.495274				0.0510108				0.280416					2.37369				0.867413					1.05607				0.594715				0.0120484					0.180235				0.0124452
1.0705				3.1345					0.495597				0.0517912				0.280731					0.372727				0.528058					1.74268				0.823126				1.10061					0.180456				0.0124452
5.69743				2.4407					0.495603				0.0518964				0.281892					0.391586				1.53222					0.245586				0.58815				2.2927					0.181416				0.0124452
0.357108				1.18462					0.495898				0.0519129				0.282376					0.9626				0.0103718					0.956674				0.907821				0.729115					0.181438				0.0124452
0.731662				0.507444					0.496161				0.0519962				0.282526					0.0112049				1.44509					0.853128				2.75611				0.249547					0.181836				0.0124452
1.94636				2.47683					0.49661				0.0543632				0.282676					0.809167				0.995829					0.49358				2.18489				3.65333					0.181898				0.0124452
0.724071				4.7956					0.497112				0.0548613				0.282812					0.546527				1.66189					0.806196				0.955639				1.14286					0.182593				0.0124452
1.06691				0.51782					0.497367				0.0548829				0.283049					0.369006				2.72316					0.367602				1.2621				0.0124452					0.18309				0.0124452
2.04036				3.43911					0.497547				0.0554606				0.283745					0.759994				0.314853					0.0599618				1.46282				2.05184					0.183215				0.0124452
1.19299				0.182589					0.497767				0.0562554				0.284031					0.0122213				0.155767					0.520162				1.51482				0.467027					0.183711				0.0124452
0.662279				3.82898					0.497936				0.0567279				0.28408					0.765833				2.66083					2.15528				0.63899				0.10921					0.184116				0.0124452
2.07677				1.75595					0.497988				0.0581871				0.284098					0.788345				0.788565					1.06527				0.961293				0.957527					0.184637				0.0124452
0.562184				1.6527					0.49799				0.0583812				0.284587					1.60192				0.536547					1.16695				3.7164				1.25329					0.18469				0.0124452
0.0124454				4.07541					0.498001				0.0584648				0.285789					2.34969				0.992527					0.381547				0.272311				0.768312					0.185215				0.0124452
2.77278				2.03612					0.498817				0.0588054				0.286129					4.30881				2.44384					0.0850526				0.811417				0.695248					0.185228				0.0124452
9.72907				0.36567					0.498864				0.0593008				0.286567					0.259182				0.342098					1.61016				0.661929				0.715642					0.185276				0.0124452
3.11357				1.88929					0.498896				0.0598414				0.286606					0.650354				0.827736					0.458951				1.78114				0.224042					0.185414				0.0124452
8.71115				2.0885					0.499137				0.0599684				0.286767					0.0113165				1.14613					1.46928				2.38007				2.89967					0.185966				0.0124452
1.45252				8.6266					0.499255				0.0605993				0.286843					0.0778042				3.42799					0.0117499				0.51743				0.439677					0.186017				0.0124452
1.90905				2.44662					0.49963				0.0614747				0.28693					0.0618535				1.26241					1.33308				1.16725				1.16495					0.186231				0.0124452
1.64144				3.259					0.499721				0.0616511				0.287622					0.757136				0.382236					0.378729				1.13118				0.254607					0.186335				0.0124452
3.68895				0.367922					0.499992				0.0637198				0.288145					1.68412				0.23049					0.0124454				0.834394				0.397018					0.186427				0.0124452
0.663235				1.092					0.500016				0.0640219				0.288221					0.806105				2.30489					9.84838				1.81219				1.58543					0.186468				0.0124452
0.812115				0.886776					0.500413				0.0642397				0.288353					1.01091				1.25048					4.13108				0.483781				1.6525					0.18729				0.0124452
1.72917				4.41252					0.5006				0.0642479				0.288622					1.35281				3.20108					1.49664				0.337676				2.3635					0.187398				0.0124452
6.47614				1.27788					0.500726				0.0655645				0.289546					0.356436				0.831771					0.858384				0.447599				0.160627					0.18786				0.0124452
7.93224				7.92735					0.501459				0.0657967				0.289592					1.72992				0.853963					0.011709				4.56096				0.535124					0.187916				0.0124452
0.965752				3.70182					0.501668				0.065964				0.289832					2.60197				5.51507					0.315268				2.47123				1.06463					0.187937				0.0124452
3.89938				0.433247					0.50179				0.0662778				0.290326					1.06998				1.48489					0.733356				5.25685				0.705918					0.188077				0.0124452
0.271573				0.733212					0.501977				0.0668413				0.290566					4.91345				0.408111					0.425051				0.159886				1.037					0.1881				0.0124452
0.867883				2.61103					0.502321				0.0668484				0.291061					0.0113845				1.47583					0.706007				0.408495				3.27534					0.188256				0.0124452
0.285025				1.14812					0.503196				0.0671079				0.291332					1.38251				1.85972					0.822836				0.0124449				0.315255					0.188782				0.0124452
1.87479				1.56958					0.503351				0.0671385				0.291435					1.65185				3.4581					0.615058				0.251094				1.02041					0.18913				0.0124452
5.35715				2.93611					0.503457				0.0677467				0.29194					0.234499				0.50726					0.664112				19.4421				4.71799					0.189252				0.0124452
1.67014				0.401748					0.503969				0.0687937				0.29206					5.03749				0.484119					0.450308				0.662632				0.241848					0.190119				0.0124452
3.32236				1.47542					0.504027				0.0689952				0.292467					0.548668				0.445249					0.126851				1.69385				0.254942					0.190388				0.0124452
2.91253				0.158856					0.504044				0.0698442				0.292468					0.171093				0.439332					0.728231				0.680476				2.08675					0.190411				0.0124452
0.011273				3.81341					0.504055				0.0701063				0.292872					1.24512				0.876668					0.626902				0.244583				1.76216					0.190546				0.0124452
3.27008				1.11419					0.504058				0.0725064				0.293063					0.550061				2.01085					0.242413				0.0955558				1.75138					0.190828				0.0124452
4.49148				0.509755					0.504496				0.0727569				0.293191					2.76508				1.80745					0.651169				0.558646				0.356716					0.19109				0.0124452
5.40567				3.28424					0.505015				0.073595				0.293248					0.703123				0.518313					0.175864				3.06532				0.479813					0.191145				0.0124452
2.38123				0.606088					0.50544				0.0746392				0.293313					0.84606				0.922694					0.182421				2.05494				0.530294					0.19187				0.0124452
1.6147				2.44035					0.505463				0.0748751				0.293339					1.8501				3.59462					1.71317				0.112566				1.391					0.192066				0.0124452
3.09729				3.09947					0.505558				0.0748798				0.293681					2.10819				0.500125					0.889927				2.5991				5.91448					0.192398				0.0124452
3.79114				1.47409					0.505597				0.0750547				0.293899					1.66017				2.1717					0.259559				2.9216				2.51509					0.192814				0.0124452
1.41406				0.602349					0.505686				0.0752407				0.294059					2.46115				1.83792					1.03306				0.143786				0.0116184					0.193335				0.0124452
0.0124454				0.863804					0.505713				0.0757501				0.294249					0.350371				1.37014					1.64363				1.01828				0.4705					0.193794				0.0124452
0.999595				0.907058					0.505801				0.0763896				0.294394					0.372732				0.556055					0.486337				1.0261				0.681925					0.194384				0.0124452
1.72167				2.73131					0.506354				0.0764463				0.294457					1.80006				1.10381					1.99397				1.96064				0.203374					0.194676				0.0124452
4.01229				0.201289					0.507293				0.0773987				0.294474					1.26821				2.80618					0.749579				0.190019				3.50065					0.194708				0.0124452
0.86141				3.18911					0.507655				0.077902				0.295171					2.90906				0.269758					0.163753				3.78563				1.04788					0.194761				0.0124452
1.22225				2.0034					0.508331				0.0786146				0.296331					0.107002				1.25951					2.96679				1.76058				4.10206					0.195086				0.0124452
0.616316				0.26103					0.508595				0.0794573				0.296361					1.48451				0.346212					0.995949				0.219204				8.39043					0.195103				0.0124452
0.739221				1.16252					0.508808				0.0802585				0.296782					0.106473				0.549177					0.344035				1.86135				2.77272					0.195158				0.0124452
17.8088				0.742045					0.509094				0.0806261				0.29759					0.762043				2.52643					6.69325				2.72518				1.22009					0.1953				0.0124452
3.74096				2.82736					0.509194				0.0808943				0.298344					1.58027				0.100886					3.73741				0.619634				1.59664					0.195301				0.0124452
4.2563				0.768503					0.509503				0.0810281				0.298367					0.683948				0.0124459					0.430569				2.31035				1.59527					0.1959				0.0124452
5.07238				1.35518					0.50997				0.0810497				0.298378					0.74845				0.391531					2.50507				0.807116				0.799447					0.196945				0.0124452
1.66812				0.226297					0.511684				0.0810596				0.298817					1.04069				1.03599					0.0933439				1.04954				1.81186					0.19744				0.0124452
3.19568				1.79814					0.511686				0.0811169				0.299158					0.815378				0.223752					0.671965				0.642585				3.88434					0.197867				0.0124452
1.31848				0.366948					0.511697				0.0814437				0.299305					0.80767				1.32401					1.75547				4.86835				0.900108					0.198371				0.0124452
2.42265				0.331895					0.513205				0.0815557				0.299375					0.188257				1.18359					1.80743				3.6012				6.96196					0.198386				0.0124452
4.28532				0.381383					0.513518				0.0819489				0.299781					0.894577				0.494874					0.198885				0.0117532				0.681874					0.198551				0.0124452
1.06105				1.51742					0.513578				0.0838172				0.300166					1.57924				0.182121					0.416754				2.81133				1.07788					0.198788				0.0124452
1.09313				4.52267					0.514235				0.0838723				0.301941					2.39234				3.2812					4.91317				0.921586				3.95665					0.199581				0.0124452
2.26873				3.96392					0.514494				0.0839271				0.302446					1.68938				0.485827					0.0124461				0.571546				0.698576					0.199918				0.0124452
2.06623				1.53157					0.514499				0.0841831				0.302981					0.202466				0.996466					0.577123				0.0124459				0.643135					0.200302				0.0124452
1.37973				2.62837					0.515				0.085583				0.303156					2.03398				0.487135					0.771893				0.0124449				2.10768					0.200311				0.0124452
2.91256				0.816694					0.515097				0.0859688				0.303477					0.179383				0.0108952					0.359828				3.48085				0.400617					0.201193				0.0124452
0.558277				1.76224					0.515271				0.0863435				0.303717					0.851351				0.776029					1.10461				0.0124459				0.463678					0.201385				0.0124452
0.669233				3.87822					0.515347				0.0864629				0.30435					0.92154				1.11384					1.70084				1.16241				0.0124452					0.201845				0.0124452
0.79173				2.55644					0.515485				0.087063				0.304768					0.956525				3.15906					4.47079				0.0808394				0.637401					0.201995				0.0124452
2.3747				1.55771					0.515791				0.0871644				0.305101					0.937316				2.60449					1.21494				2.49714				1.33914					0.202073				0.0124452
1.70836				1.76388					0.516154				0.0876888				0.305843					0.861747				0.0856986					1.82009				0.910003				8.31155					0.20226				0.0124452
4.02262				0.677177					0.516252				0.0881164				0.306016					0.882185				0.207627					0.714447				3.08324				1.25659					0.202288				0.0124452
0.490728				1.97746					0.516895				0.0891656				0.306057					0.372202				0.337469					0.155611				1.49911				1.73158					0.202525				0.0124452
0.492502				0.62762					0.517041				0.0894636				0.306578					3.86466				3.62903					0.146578				2.14864				1.22157					0.203168				0.0124452
1.95508				0.884866					0.517729				0.090343				0.306873					1.07061				0.401629					0.136568				0.686767				1.21499					0.203343				0.0124452
2.70263				2.02791					0.518179				0.0903871				0.30715					0.199061				3.10944					1.42991				3.44371				3.62262					0.204003				0.0124452
2.69131				1.04491					0.518826				0.0905691				0.30731					3.04216				0.769841					0.820828				3.71386				2.15373					0.204382				0.0124452
4.74916				0.470856					0.518992				0.0906864				0.307386					2.22987				0.801803					0.892154				0.00973336				1.70006					0.204433				0.0124452
2.76413				2.68464					0.519198				0.0906944				0.307602					1.0493				9.81058					2.14486				1.20507				1.139					0.204542				0.0124452
0.0124449				0.869318					0.519737				0.0915743				0.308472					0.787269				1.1873					0.712967				1.31007				2.77246					0.204586				0.0124452
4.46917				0.153269					0.519811				0.0915799				0.308723					2.4332				0.00963225					1.68074				1.00893				5.84783					0.205582				0.0124452
1.54113				1.16733					0.519825				0.0920834				0.308806					1.95853				0.313198					0.741742				0.785467				2.31422					0.205825				0.0124452
0.85899				1.08603					0.520483				0.0921335				0.30895					1.29976				1.72992					0.429887				0.0108909				0.0100498					0.20589				0.0124452
0.51321				0.281862					0.52071				0.0921633				0.310962					2.80616				0.348157					0.602919				2.38545				0.978658					0.20614				0.0124452
0.373283				0.200751					0.521342				0.0922587				0.31125					0.924136				0.392865					1.46366				1.56396				0.0842313					0.206727				0.0124452
0.0112277				0.783281					0.52136				0.0926298				0.311311					0.131087				0.0115338					0.507941				2.45385				4.61867					0.20678				0.0124452
0.546413				1.39073					0.521591				0.0931667				0.311691					2.81662				0.494957					2.23488				2.70887				2.43749					0.207015				0.0124452
0.011153				1.45826					0.52292				0.0934326				0.311941					0.447512				2.97711					0.575408				3.3377				0.0124452					0.207119				0.0124452
1.80568				0.762661					0.523131				0.093809				0.312376					0.978812				0.7444					0.483321				0.72724				0.654635					0.207122				0.0124452
3.32235				3.11529					0.523171				0.0943183				0.312605					0.637984				0.94305					3.45374				2.38628				0.510038					0.207172				0.0124452
0.0108755				1.84759					0.52319				0.0946193				0.312995					1.1262				0.118354					0.869132				1.04524				1.51693					0.207565				0.0124452
1.64909				1.03847					0.523369				0.0946424				0.31332					0.0124454				0.161287					0.491963				4.14232				0.499004					0.208327				0.0124452
3.4692				4.69505					0.523437				0.0951771				0.313384					6.16158				1.8424					0.506458				0.0124449				0.246645					0.20866				0.0124452
2.50963				0.967112					0.523525				0.0978105				0.313397					1.67801				2.64657					0.332484				1.17827				7.65743					0.209009				0.0124452
2.39012				0.0117692					0.52366				0.0985799				0.313418					0.65833				4.11085					0.506002				1.52219				0.165992					0.20902				0.0124452
5.86154				3.12927					0.523764				0.0985885				0.313667					2.01897				0.523991					1.19268				0.0124459				0.465515					0.20937				0.0124452
0.583431				0.339623					0.524243				0.0987671				0.313722					0.255524				1.743					3.15148				2.02257				1.2769					0.209627				0.0124452
1.13749				3.0859					0.524367				0.0991469				0.313772					0.123676				1.66097					0.688354				0.610862				0.273436					0.209752				0.0124452
2.82778				1.46162					0.524518				0.100016				0.313995					0.468297				0.366731					2.23529				0.0124449				1.15384					0.210164				0.0124452
0.768726				7.00329					0.524671				0.101627				0.314028					0.415014				2.69457					1.7531				1.35613				0.239835					0.210269				0.0124452
0.290805				0.25495					0.524785				0.101689				0.314063					4.34162				1.0247					1.46575				2.08312				2.07767					0.210869				0.0124452
0.524215				0.26723					0.524878				0.101717				0.314575					3.04519				0.525708					0.621067				0.0124449				0.203191					0.210975				0.0124452
3.70023				1.2116					0.525358				0.102177				0.314682					3.22347				2.86333					0.466923				1.83455				0.0671418					0.211229				0.0124452
0.864421				0.737195					0.525499				0.103				0.314814					3.79409				2.67941					1.49095				0.348478				1.10095					0.211588				0.0124452
7.08035				1.68065					0.52587				0.103583				0.31539					0.842833				0.0124454					1.22251				1.13224				2.42224					0.211891				0.0124452
0.858512				2.93169					0.526737				0.103694				0.31558					0.541407				0.930863					0.655042				0.351363				0.476294					0.212168				0.0124452
3.0005				0.655057					0.52681				0.103793				0.315668					0.978831				2.03074					1.1671				1.95879				0.231413					0.212366				0.0124452
6.08961				0.0123564					0.526936				0.104356				0.315764					0.620708				0.846023					2.62318				1.17175				0.117351					0.212911				0.0124452
1.10832				4.98875					0.527218				0.105024				0.315809					1.75418				1.09522					1.51751				0.367741				0.159891					0.213032				0.0124452
3.16116				0.17011					0.527769				0.105364				0.315973					0.625816				0.913969					0.435146				1.95044				0.421594					0.213785				0.0124452
0.876599				0.392868					0.527814				0.106495				0.316228					2.62911				2.56216					2.62927				0.0124425				0.254819					0.214037				0.0124452
0.288108				1.43448					0.527815				0.107063				0.316492					1.11304				3.8086					2.54721				1.41916				0.640907					0.21456				0.0124452
1.67997				1.35623					0.52786				0.107849				0.316574					1.53689				0.284454					0.0116063				2.90402				0.829073					0.214979				0.0124452
0.916004				4.84915					0.527864				0.108333				0.316828					0.927308				0.827097					1.1902				0.661873				0.663275					0.215091				0.0124452
2.01917				1.84522					0.528371				0.109118				0.316944					0.812078				2.43575					2.38226				0.377387				0.253339					0.215208				0.0124452
4.10297				2.89449					0.528883				0.109268				0.317334					0.778267				0.512402					1.25474				0.576732				0.911137					0.215597				0.0124452
0.837303				1.95632					0.529421				0.109488				0.317402					0.939708				1.10789					0.319569				1.1697				4.93828					0.215647				0.0124452
1.61527				0.347205					0.529559				0.109553				0.317691					0.982314				0.62883					3.05955				0.345728				0.494469					0.216159				0.0124452
0.450503				3.95153					0.529739				0.110322				0.317807					1.54394				0.798455					1.76178				1.51928				0.318905					0.216565				0.0124452
0.509783				0.918744					0.530082				0.110527				0.317835					0.378614				0.369803					0.0124452				3.52791				0.382985					0.216565				0.0124452
0.556535				0.122122					0.530282				0.110675				0.318004					2.54				1.21236					3.41435				0.106098				1.71426					0.216683				0.0124452
7.11711				1.49158					0.530619				0.11138				0.318035					0.0102234				0.0118634					2.70924				0.343706				0.382418					0.216794				0.0124452
9.1886				4.46771					0.530658				0.11149				0.318046					2.81752				0.994482					3.29134				0.158822				0.562656					0.217005				0.0124453
1.26429				2.04783					0.530792				0.112137				0.31812					1.77246				0.0124454					0.0124452				1.94515				2.13459					0.218375				0.0124453
0.397047				3.31498					0.530811				0.112186				0.318149					0.232352				3.26222					0.44072				8.30316				0.278653					0.218567				0.0124453
3.58117				3.60846					0.530812				0.112432				0.318162					10.8954				0.0124454					3.31066				0.453855				7.15599					0.218962				0.0124453
2.18186				3.8974					0.531069				0.112593				0.318372					0.404333				2.85374					0.0735563				1.37444				0.788661					0.21919				0.0124453
0.887989				4.8465					0.531295				0.113582				0.318777					1.06626				1.58157					0.300106				0.640855				0.166409					0.219494				0.0124453
3.33223				3.41601					0.531882				0.113711				0.318812					1.95491				0.411141					1.45813				1.01633				0.669619					0.219537				0.0124453
4.45759				1.17007					0.532582				0.113793				0.318951					1.41274				2.83737					2.07733				0.397327				3.44576					0.219538				0.0124454
1.15533				2.69381					0.532894				0.114192				0.319081					1.47846				0.734081					3.77843				2.16589				1.2275					0.220865				0.0124454
1.42367				1.32782					0.533306				0.115035				0.319217					0.0124119				0.0124459					2.24482				1.87352				4.18974					0.221203				0.0124454
4.16224				1.41011					0.533648				0.115058				0.319368					3.04124				4.5096					0.424093				2.22462				1.81965					0.221405				0.0124454
0.0116504				2.25225					0.533716				0.115167				0.31981					3.78471				2.14477					0.167103				2.07959				0.763615					0.2218				0.0124454
1.00643				2.51166					0.533776				0.115834				0.320145					2.06377				3.73925					3.28099				0.195765				1.43198					0.221906				0.0124454
0.859734				5.70267					0.534029				0.116014				0.320155					0.972984				5.09994					4.26887				2.55055				0.829031					0.222036				0.0124454
1.25364				0.706694					0.534049				0.116824				0.320344					5.89711				1.29153					0.0117388				4.15944				0.199137					0.222157				0.0124454
2.66566				0.137955					0.534132				0.117618				0.320992					1.22588				1.36235					0.628246				0.264818				0.252931					0.222185				0.0124454
2.40513				2.74241					0.534987				0.117996				0.321172					0.0100493				0.624998					0.312961				2.50492				0.129258					0.222331				0.0124454
6.32861				0.62686					0.535541				0.11811				0.321515					0.0106345				2.71463					0.331329				11.5319				0.372312					0.222639				0.0124454
1.71261				3.29594					0.536157				0.118597				0.321604					0.465972				1.96565					0.154937				0.256304				0.432002					0.222974				0.0124454
0.600915				2.78531					0.536192				0.118968				0.321635					1.6133				0.679827					0.358408				0.312175				3.82889					0.22381				0.0124454
0.657568				0.66891					0.536291				0.119376				0.321963					1.40371				1.57251					0.416351				0.769113				0.103497					0.224126				0.0124454
7.24932				2.0013					0.536787				0.11942				0.322078					0.65101				0.870379					0.268526				0.244672				5.4969					0.224148				0.0124454
4.38892				0.0124449					0.536898				0.119955				0.322448					3.16146				1.99492					5.16895				0.614564				0.71072					0.224363				0.0124454
0.981406				0.0124459					0.537586				0.120872				0.3228					1.13741				0.699791					1.41549				0.99057				0.530117					0.224678				0.0124454
5.93044				6.254					0.537653				0.120898				0.323352					0.0855989				0.0116217					0.208828				1.20879				1.71824					0.224744				0.0124454
4.17472				7.01203					0.53787				0.121012				0.323904					2.98598				4.96333					0.831722				2.16901				1.69361					0.225014				0.0124454
2.02701				1.87624					0.538787				0.121888				0.324095					0.691909				0.389923					0.267576				0.445106				0.126556					0.225415				0.0124454
1.49937				1.78657					0.539142				0.121977				0.324516					0.918586				0.777173					1.39946				0.848317				0.0396595					0.225682				0.0124454
0.920467				0.663605					0.539622				0.122772				0.325228					1.57285				0.749211					0.0457489				4.30274				0.437703					0.225982				0.0124454
1.53979				2.3336					0.541061				0.122919				0.32534					0.00951067				1.75507					0.828767				2.35567				0.610639					0.226029				0.0124454
0.640843				0.998594					0.541121				0.122946				0.325809					0.0124449				0.445214					2.87957				3.39145				0.7846					0.226494				0.0124454
0.53187				1.33322					0.541734				0.123895				0.326166					0.0115725				2.16827					1.72787				1.43952				4.48308					0.226497				0.0124454
1.47656				1.69659					0.541799				0.123987				0.326226					0.317366				1.33153					2.29892				0.671394				1.69551					0.226566				0.0124454
3.47953				2.91161					0.542223				0.12403				0.32625					0.586371				6.94314					1.66841				0.449176				1.5158					0.22662				0.0124454
2.52462				2.88123					0.542482				0.124074				0.326498					0.909274				0.78527					0.260756				0.775146				1.12057					0.227275				0.0124454
1.59075				5.63474					0.542884				0.124134				0.327015					2.07839				0.373896					1.37118				2.16879				0.00986783					0.2278				0.0124454
3.51057				3.85859					0.543104				0.124164				0.327023					0.00940391				0.011902					0.205558				2.91802				2.583					0.228037				0.0124454
1.01985				2.775					0.543478				0.124437				0.327189					0.830341				0.570949					0.920848				0.316045				3.81415					0.228126				0.0124454
2.72238				3.59065					0.543505				0.124614				0.327304					0.53993				0.550699					0.75135				0.36393				0.351765					0.228346				0.0124454
1.56806				2.51917					0.543954				0.124651				0.327729					0.256147				0.584008					0.777898				0.253906				2.23184					0.228494				0.0124454
6.79707				2.67291					0.544464				0.124662				0.328762					0.282249				0.417451					0.579603				0.0703617				0.879211					0.228666				0.0124454
1.54429				0.0124449					0.544965				0.124819				0.330846					0.175587				1.71144					0.294716				1.50926				0.546467					0.228685				0.0124454
2.30136				1.34679					0.544986				0.125277				0.33089					0.912098				1.28399					0.693596				1.3067				1.26076					0.22963				0.0124454
0.997085				3.06166					0.545153				0.125903				0.331141					1.26721				0.4047					0.125702				0.722326				9.81164					0.229982				0.0124454
5.46614				4.68121					0.545324				0.126343				0.331148					2.48294				1.03158					0.0985428				0.0124449				0.362464					0.230356				0.0124454
2.55021				0.0124459					0.545982				0.126639				0.331475					0.69965				4.55752					0.447217				1.08644				0.197743					0.230386				0.0124454
2.00357				2.64044					0.546076				0.126645				0.331568					1.24493				0.415622					1.55041				0.0120629				0.865254					0.230506				0.0124454
1.8746				3.07473					0.546487				0.127179				0.331997					1.36558				0.913826					2.05554				1.3133				0.197533					0.23051				0.0124454
2.4236				0.010911					0.546894				0.128539				0.332508					4.30746				0.880933					0.0111714				4.55864				0.0124452					0.231015				0.0124454
4.13485				0.801506					0.547335				0.129424				0.332524					0.609801				1.02813					0.381187				3.4987				0.427136					0.231275				0.0124454
1.2136				1.49867					0.54763				0.129599				0.333044					0.146109				0.235726					1.41157				0.0121549				1.03733					0.231761				0.0124454
1.07124				1.88414					0.547637				0.129608				0.333394					3.27885				2.89505					0.601827				1.78072				0.986756					0.232375				0.0124454
2.0912				0.4438					0.547692				0.129687				0.333414					19.5366				1.00281					1.72008				0.611058				0.499847					0.232408				0.0124454
0.00988736				2.96916					0.548343				0.1302				0.334033					1.38161				0.89827					2.58878				3.0896				0.683379					0.232722				0.0124454
1.54799				1.45123					0.548673				0.130221				0.334061					0.914147				1.59111					3.01382				2.71713				2.6329					0.232952				0.0124454
4.29563				1.11023					0.548823				0.130844				0.334142					2.35716				0.705322					4.81374				0.478486				11.2523					0.232997				0.0124454
2.46142				0.207943					0.549132				0.131789				0.334297					1.93266				1.42803					3.34098				1.65769				1.46698					0.233892				0.0124454
1.96732				0.267968					0.549189				0.132486				0.334836					0.283208				1.97489					1.5113				0.00948771				1.34404					0.234142				0.0124454
1.24142				1.01497					0.54938				0.132934				0.334922					0.191045				8.40743					1.9393				1.38853				0.336457					0.234275				0.0124454
2.12408				0.911354					0.549505				0.13355				0.33522					2.16125				0.488504					0.946779				1.83405				1.61281					0.234526				0.0124454
0.833917				6.42027					0.549681				0.134368				0.335253					1.00421				1.74585					1.7441				1.17502				0.815321					0.234838				0.0124454
1.05869				0.861214					0.549785				0.134607				0.335895					0.350239				1.72184					0.311936				0.358573				0.270527					0.234995				0.0124454
0.965071				0.819906					0.550258				0.134761				0.336109					0.845912				0.540355					0.359136				3.17891				0.528797					0.235163				0.0124454
0.174319				3.44736					0.550456				0.134978				0.33613					0.621437				1.01599					1.48986				0.461989				0.0124452					0.235252				0.0124454
3.57486				1.2525					0.550737				0.135031				0.336193					3.47144				1.61288					1.06949				2.77303				0.701815					0.235744				0.0124454
2.57378				1.66813					0.550973				0.135284				0.33661					0.233284				0.0123785					5.66832				0.926749				0.203069					0.23638				0.0124454
0.668538				2.83179					0.551011				0.135893				0.336632					1.12101				3.00433					0.896686				2.15455				0.49688					0.236939				0.0124454
2.56812				0.430718					0.551269				0.136625				0.33728					1.16729				4.48844					0.705296				1.29919				0.765581					0.237448				0.0124454
3.93964				1.7406					0.551471				0.136796				0.338034					1.93298				0.403796					1.93378				1.07135				2.39738					0.238023				0.0124454
1.03225				0.854104					0.552034				0.137063				0.338112					0.919468				1.24907					2.31618				0.214978				1.93428					0.238033				0.0124454
2.03659				5.44823					0.552085				0.13731				0.338484					0.235069				2.56425					1.62156				0.273019				0.0124452					0.23805				0.0124454
0.875387				0.324669					0.552131				0.137569				0.338619					1.91294				5.4308					0.0124449				0.615671				0.0124452					0.238105				0.0124454
5.61036				0.342796					0.5529				0.13789				0.338669					2.50083				1.07872					1.974				1.34344				1.17433					0.238121				0.0124454
5.28185				1.09224					0.552963				0.138476				0.338851					0.112519				0.00984928					0.0124454				2.48112				0.277421					0.238954				0.0124454
1.59903				0.15121					0.553096				0.138587				0.339368					3.13009				0.858869					1.34854				3.05103				1.67361					0.238999				0.0124454
3.51711				1.00404					0.55378				0.139353				0.339967					0.245763				0.380162					1.63037				0.471582				0.371042					0.239411				0.0124454
0.582599				0.351343					0.554306				0.14002				0.340485					0.0908994				1.73091					2.11959				2.72363				0.997307					0.239444				0.0124454
4.33503				0.00947698					0.554706				0.140214				0.340775					3.90714				2.71985					8.17893				1.66402				0.364872					0.239504				0.0124454
1.26179				2.00099					0.555006				0.140266				0.341249					1.04046				1.6334					1.03624				1.35577				3.16599					0.239602				0.0124454
3.0477				0.28333					0.555035				0.140894				0.341254					1.26965				1.80881					1.50261				0.941906				0.331781					0.23997				0.0124454
0.0124449				4.34588					0.55506				0.141058				0.341659					2.41159				0.880163					1.54738				0.451195				0.617492					0.240013				0.0124454
1.60269				6.03281					0.555093				0.141099				0.34174					1.45331				4.93031					1.3128				0.987887				0.182915					0.240025				0.0124454
4.13889				2.8807					0.555457				0.141341				0.341758					0.735322				1.5035					7.26861				4.76802				0.612296					0.240103				0.0124454
1.18871				0.0124449					0.555628				0.141365				0.341938					1.4694				5.43015					4.41777				4.23359				1.70906					0.240152				0.0124454
1.3504				1.63931					0.555792				0.141781				0.343273					1.84916				4.97573					1.37402				0.351374				0.192797					0.240279				0.0124454
1.99109				1.43741					0.556562				0.142342				0.343381					1.40752				0.430763					5.53134				2.13076				0.21894					0.241017				0.0124454
0.890391				0.0124449					0.556581				0.144772				0.343729					1.18932				0.271414					1.05283				2.30734				0.925747					0.241712				0.0124454
0.0115461				0.737596					0.556732				0.144823				0.344136					0.559688				1.08788					0.926902				1.61246				0.713024					0.242418				0.0124454
0.417014				0.56478					0.556801				0.145532				0.344504					0.971391				1.53991					1.20608				0.56121				1.50259					0.242724				0.0124454
1.1969				0.911059					0.556803				0.146989				0.344509					0.659567				0.202598					0.594501				5.13528				0.988486					0.242848				0.0124454
1.29408				0.528954					0.556971				0.147108				0.344958					3.57366				0.513896					2.03568				1.36327				0.203873					0.24316				0.0124454
3.01076				0.611					0.557024				0.147273				0.345441					3.79847				0.789651					4.14062				3.34366				1.48476					0.243442				0.0124454
1.03324				2.39422					0.557105				0.147674				0.346022					3.07229				4.53343					0.448301				0.505404				0.930749					0.243473				0.0124454
5.34237				0.794802					0.557319				0.14806				0.346054					1.33021				3.50021					0.220208				0.442027				0.139355					0.24373				0.0124454
3.3129				0.0110871					0.557818				0.148354				0.346123					2.45319				2.12594					0.418532				0.801883				1.17227					0.244236				0.0124454
4.1837				3.99545					0.558335				0.148363				0.346156					1.33949				0.235347					1.13244				0.666149				0.490766					0.24425				0.0124454
1.81443				0.722694					0.558451				0.148426				0.347134					0.278862				0.822451					1.93415				0.594144				3.74166					0.244578				0.0124454
3.52789				2.41528					0.558527				0.149041				0.347329					0.944708				0.793172					0.662385				0.0124351				0.482374					0.244677				0.0124454
0.611381				4.49059					0.558877				0.149215				0.348678					11.9317				0.0916923					0.731638				0.196654				0.441559					0.245064				0.0124454
1.29016				2.82554					0.560061				0.150345				0.348998					0.642956				0.0111934					0.799917				0.914785				1.38417					0.245092				0.0124454
2.99687				0.0830089					0.560142				0.150877				0.349138					0.804439				2.04978					0.289163				1.54847				0.0620111					0.245242				0.0124454
5.46318				2.31702					0.560409				0.151009				0.349579					3.54147				0.0117216					3.71973				1.11663				2.4926					0.24591				0.0124454
4.33711				1.96131					0.560629				0.151833				0.349654					1.93788				0.0103606					5.06079				1.87243				2.00668					0.245934				0.0124454
3.15813				1.92289					0.561046				0.15188				0.350058					6.36676				1.75874					0.553075				0.216603				2.72288					0.246109				0.0124454
6.36643				2.31477					0.561171				0.15231				0.350322					0.252352				0.00961232					4.2445				2.63329				0.011325					0.246114				0.0124454
0.862399				0.0119284					0.561698				0.152577				0.350667					1.01197				0.0124449					3.66482				0.069648				0.412788					0.246208				0.0124454
7.97317				1.78479					0.561733				0.152764				0.350923					1.64986				2.45499					0.0113109				1.17705				0.0124452					0.246313				0.0124454
1.6367				2.66937					0.561776				0.152859				0.351902					1.19192				1.64721					6.07949				0.272521				0.686351					0.246318				0.0124454
3.23423				0.0117666					0.56194				0.153397				0.351934					3.32292				0.159041					1.79025				0.0110087				1.21714					0.24656				0.0124454
2.62797				0.578719					0.562087				0.153546				0.352339					0.274932				1.20922					1.46544				0.588879				4.7354					0.247746				0.0124454
2.02688				0.40316					0.563791				0.154064				0.353239					4.25339				0.868394					1.76378				0.917647				0.0124457					0.249222				0.0124454
1.66759				1.35864					0.564065				0.154344				0.353939					2.42786				0.44781					0.837786				4.61021				1.20319					0.249487				0.0124454
0.264706				6.18765					0.564107				0.154663				0.354065					1.11807				0.776831					2.4061				1.23503				1.258					0.249707				0.0124454
1.13334				0.312679					0.565632				0.155007				0.354278					0.283008				3.92807					2.32335				0.604769				1.0675					0.250116				0.0124454
3.93064				6.97963					0.565686				0.155084				0.35437					3.66404				0.299207					1.69898				4.8878				0.106197					0.250156				0.0124454
5.14608				2.84248					0.565756				0.155306				0.354444					1.2648				0.296334					1.04814				0.570273				0.637338					0.250247				0.0124454
2.51813				2.45523					0.565844				0.15543				0.354527					0.852191				1.80183					1.66663				0.0124459				1.19849					0.250544				0.0124454
4.99335				3.97878					0.566465				0.155804				0.354759					1.5064				0.703427					1.10298				0.745471				0.0829275					0.251319				0.0124454
4.58907				7.13243					0.567363				0.15583				0.355775					1.26523				1.58909					0.59572				7.68696				0.611276					0.251366				0.0124454
0.249497				1.33503					0.56745				0.155923				0.355888					0.649209				0.899377					7.2524				1.48555				1.25572					0.251519				0.0124454
1.44714				1.37338					0.568334				0.156425				0.356027					0.145509				0.406434					1.28293				2.59185				0.540887					0.251704				0.0124454
4.38364				0.320949					0.568473				0.156458				0.356219					1.39562				1.6305					5.08455				1.2913				1.98144					0.252409				0.0124454
5.62876				4.87375					0.569313				0.156836				0.356836					3.42304				0.723135					1.13057				1.78536				1.62021					0.252534				0.0124454
1.97555				13.2063					0.569445				0.156902				0.356898					6.12486				0.943081					0.0124461				2.16953				0.609626					0.252583				0.0124454
2.57684				3.23491					0.569535				0.157028				0.357432					0.852424				15.7453					5.39022				2.33506				0.495545					0.253457				0.0124454
1.00198				0.294922					0.569685				0.157326				0.357619					0.777962				0.765274					1.22359				0.0610135				4.21047					0.253555				0.0124454
1.80909				0.397881					0.569968				0.157398				0.357708					0.694981				0.847439					0.381846				1.89446				0.431375					0.253702				0.0124454
3.83672				1.07177					0.570085				0.157524				0.357755					0.0104656				0.75246					0.213955				2.45734				0.319167					0.253751				0.0124454
2.59658				0.521993					0.570783				0.157573				0.35792					0.303765				2.47201					0.647025				4.10085				0.212202					0.254279				0.0124454
1.36346				4.65355					0.571223				0.157829				0.357987					0.988341				0.341788					0.146309				0.872522				0.208496					0.254391				0.0124454
1.50268				0.780963					0.571242				0.158463				0.358064					2.99866				3.22689					1.3088				0.0846454				0.167594					0.254811				0.0124454
2.60527				0.420562					0.571317				0.158889				0.358212					3.1495				1.29312					0.0113674				5.46983				0.00929095					0.255037				0.0124454
4.28888				1.12312					0.571411				0.160557				0.358583					0.440961				1.65943					0.00954067				3.82631				0.559852					0.255047				0.0124454
2.36771				0.225161					0.571722				0.160722				0.358746					3.21971				1.52396					0.087091				1.79462				0.424792					0.255484				0.0124454
4.69287				0.821978					0.571987				0.161334				0.358757					0.490487				0.394059					0.0124452				0.805144				2.00613					0.256457				0.0124454
2.4995				6.80651					0.572245				0.161716				0.358815					1.06372				4.19312					0.224667				0.0124449				0.941122					0.256673				0.0124454
0.580759				4.71757					0.572343				0.161775				0.359502					4.38091				6.35783					0.45023				0.938435				1.57325					0.256682				0.0124454
3.12548				0.29553					0.572374				0.161809				0.359693					2.61669				0.574978					0.814658				3.64179				0.307604					0.256927				0.0124454
2.25727				1.315					0.572427				0.161927				0.359748					0.700027				0.286132					0.918056				0.6465				1.08331					0.257493				0.0124454
0.48946				0.912394					0.572469				0.162016				0.359749					0.0124464				6.03703					1.69139				2.31145				0.140051					0.257819				0.0124454
2.29553				1.28095					0.572619				0.162017				0.359771					1.14548				1.47166					0.568927				1.86124				1.88356					0.257829				0.0124454
1.20972				0.510371					0.572803				0.162067				0.360081					1.27724				1.13401					0.954887				4.68757				1.8491					0.257907				0.0124454
1.62246				1.12189					0.57284				0.162645				0.360234					4.03459				0.414901					1.45366				0.527118				0.0477776					0.258036				0.0124454
3.35697				1.65843					0.572987				0.163117				0.360409					0.311856				0.192356					0.149921				1.22166				3.88507					0.259049				0.0124454
0.0124454				1.87836					0.573354				0.163321				0.36049					7.15908				0.814332					1.36085				4.63031				1.71827					0.259167				0.0124454
5.26386				1.35304					0.573361				0.163436				0.360588					0.118824				0.624323					0.140745				0.232495				2.53033					0.259253				0.0124454
0.312463				0.0124451					0.573493				0.163539				0.360677					0.690943				0.0104598					0.181134				0.849805				0.421868					0.259692				0.0124454
2.4981				2.57185					0.573591				0.164049				0.361533					2.87407				1.54756					1.19753				5.58871				0.308741					0.259735				0.0124454
2.23776				1.47755					0.573621				0.164153				0.362439					1.25717				1.29884					2.75763				0.46894				0.967035					0.260719				0.0124454
2.90837				2.25651					0.573789				0.164346				0.362607					4.94379				1.61666					0.137065				0.392738				0.434006					0.261207				0.0124454
2.62449				3.22004					0.57379				0.164386				0.36392					1.04131				1.3916					0.0121297				0.623946				0.0968669					0.261358				0.0124454
2.04463				4.40478					0.573996				0.164433				0.364026					0.274939				1.12326					2.49191				1.15961				1.12309					0.261658				0.0124454
4.545				1.1113					0.574065				0.16453				0.36416					0.293293				0.953922					0.753402				1.53577				0.933704					0.261701				0.0124454
0.589485				1.74651					0.574359				0.164645				0.364173					6.44811				1.65304					1.73261				0.121944				1.0923					0.26175				0.0124454
2.13636				1.9613					0.574648				0.164849				0.364284					1.80755				0.0124449					2.42378				6.36667				1.26589					0.262102				0.0124454
0.381265				2.56487					0.57474				0.165687				0.364296					1.05526				0.0107031					1.71292				2.20202				0.45053					0.26277				0.0124454
2.59914				0.0109049					0.575092				0.165733				0.364485					0.981874				5.9269					0.892447				1.06949				0.357475					0.262812				0.0124454
1.07487				1.54242					0.57533				0.165735				0.365317					1.39031				7.4905					0.0124461				0.0574209				8.26654					0.263148				0.0124454
3.443				4.14325					0.575427				0.166175				0.365727					2.9158				3.55754					0.372031				0.919403				0.742596					0.263262				0.0124454
1.60444				0.334136					0.575868				0.167009				0.365758					2.36732				1.65078					2.22249				1.0267				2.35928					0.263387				0.0124454
10.383				0.41845					0.576457				0.167099				0.366239					0.525278				0.689582					2.90613				0.0107079				1.73348					0.263414				0.0124454
1.57096				0.288364					0.576924				0.167189				0.366582					0.212169				0.0122186					0.15435				0.502459				4.57595					0.263652				0.0124454
3.17553				1.43398					0.578096				0.167567				0.366687					0.0115026				2.42315					0.521843				0.0124464				0.675018					0.263799				0.0124454
4.8549				0.941358					0.578671				0.16757				0.366772					2.15744				0.692207					1.84469				0.37955				1.00057					0.263947				0.0124454
1.2847				0.0124452					0.579106				0.167639				0.367491					0.287602				0.6197					0.227232				0.50028				0.282714					0.264358				0.0124454
1.64054				0.0124449					0.579608				0.167791				0.368102					1.41791				0.624703					0.856149				0.0993302				0.349308					0.264981				0.0124454
9.10146				0.457711					0.579813				0.167833				0.368357					0.894585				4.25542					0.388231				1.13656				1.43511					0.26538				0.0124454
1.79078				0.0107427					0.579922				0.168148				0.368497					2.84674				4.57294					1.14461				2.57307				0.506018					0.265383				0.0124454
4.66544				1.68279					0.580456				0.1684				0.36866					2.4658				1.09134					0.242786				2.72328				0.499835					0.265513				0.0124454
2.52147				7.07287					0.580741				0.168806				0.368743					1.51089				1.71559					2.41386				0.415695				2.40478					0.265673				0.0124454
0.801138				11.5057					0.580902				0.168927				0.368938					0.401101				0.994296					0.373211				2.79553				0.15568					0.26597				0.0124454
1.63871				0.010499					0.581028				0.169035				0.369332					0.442974				0.104395					0.585593				0.602346				1.91368					0.266062				0.0124454
1.94392				0.547297					0.581273				0.169061				0.369642					0.494976				2.08233					0.635398				0.251209				0.303758					0.266218				0.0124454
2.65168				2.10157					0.581444				0.169607				0.370057					2.37374				0.541597					0.781271				0.932383				0.634765					0.268103				0.0124454
4.24918				0.394591					0.581552				0.169726				0.370222					1.13625				1.53925					4.56061				3.71263				1.42343					0.268128				0.0124454
1.02555				3.50627					0.581849				0.170035				0.370453					0.551383				3.68076					2.24997				0.0124449				2.79799					0.268454				0.0124454
0.0124449				1.41439					0.582114				0.170102				0.370777					0.344622				0.0124464					0.979397				0.609044				1.04164					0.268982				0.0124454
0.901508				1.26609					0.582316				0.170506				0.370806					0.691481				0.777828					4.54644				0.170944				1.0305					0.269519				0.0124454
1.59252				0.682712					0.582377				0.17094				0.371282					1.72776				1.15083					5.41398				0.937936				2.00325					0.269675				0.0124454
2.45924				0.844517					0.582693				0.171357				0.37139					0.600897				0.914682					2.47544				0.541004				0.894585					0.269863				0.0124454
5.18916				1.11189					0.582974				0.171859				0.371794					0.68527				2.05614					0.218109				0.0124449				2.77091					0.270098				0.0124454
0.0120674				2.21225					0.583114				0.17194				0.37186					2.84831				0.313716					0.117042				1.45815				0.518485					0.270361				0.0124454
1.39595				0.419009					0.583286				0.172265				0.372121					0.408435				1.81689					0.0121192				0.756963				1.02707					0.270596				0.0124454
4.30015				0.652325					0.583354				0.172335				0.372455					1.8127				2.59053					0.565723				0.285515				0.919023					0.270901				0.0124454
1.33193				0.993866					0.583475				0.172865				0.373069					3.45314				0.812269					1.63292				1.43002				1.00238					0.27117				0.0124454
1.14514				1.04201					0.583979				0.172955				0.373108					0.969052				0.495768					1.72695				0.945715				1.1584					0.272082				0.0124454
0.994799				0.180413					0.584				0.173131				0.373254					1.14168				3.4357					1.72098				0.249638				0.218372					0.272529				0.0124454
0.0124459				0.177161					0.584214				0.173328				0.373654					1.99716				2.85672					2.80806				0.464504				3.3589					0.273016				0.0124454
4.68892				2.15135					0.584535				0.173457				0.3738					1.41552				2.12599					0.966027				3.24421				0.257015					0.273116				0.0124454
1.23061				2.42256					0.584872				0.174078				0.37387					0.389239				3.683					0.47107				5.70172				0.152156					0.273181				0.0124454
3.75455				0.252428					0.585552				0.174277				0.37409					2.31303				1.64646					1.21935				1.0965				0.866923					0.27357				0.0124454
2.76577				0.839962					0.585671				0.174511				0.374664					3.42382				2.39341					0.158927				0.706794				0.93824					0.274505				0.0124454
0.938971				1.87001					0.586116				0.174582				0.37499					0.446411				3.49357					0.96341				0.506977				0.194386					0.274597				0.0124454
1.62075				1.32302					0.587249				0.175067				0.375251					0.122638				2.86545					1.61346				1.03733				0.63421					0.274865				0.0124454
2.85026				1.37509					0.587736				0.176359				0.376072					0.0124454				2.65113					1.68274				2.03142				1.03526					0.275424				0.0124454
0.347425				4.02079					0.587859				0.176512				0.376266					3.06323				1.3586					1.8001				1.2464				0.460312					0.276009				0.0124454
0.366229				0.0124464					0.588259				0.176515				0.379282					1.26213				1.736					0.0932533				0.592521				3.24417					0.276401				0.0124454
0.63844				1.701					0.588295				0.176916				0.379905					0.00930135				0.365419					0.0116483				0.954645				0.899769					0.276753				0.0124454
0.474239				1.31535					0.588466				0.176951				0.380097					0.162845				3.28034					2.10222				1.93209				1.18319					0.277142				0.0124454
0.916803				0.0118136					0.588894				0.178001				0.380486					0.508257				0.439052					0.0124457				0.158036				1.07321					0.277171				0.0124454
1.18257				1.97049					0.588903				0.178222				0.381046					1.63542				1.84764					2.91899				0.384864				0.0114607					0.277288				0.0124454
0.91701				6.56325					0.589126				0.17842				0.381091					0.648727				1.32946					2.1019				0.209568				0.565152					0.277328				0.0124454
2.026				1.38458					0.589459				0.178885				0.381597					0.246619				0.248917					2.02428				0.417717				0.424312					0.277367				0.0124454
1.40062				1.07829					0.589498				0.179229				0.38192					1.82823				9.96091					1.57004				0.717809				2.60344					0.277473				0.0124454
1.7023				6.42918					0.589667				0.180278				0.381994					0.595955				5.97061					0.393486				11.0261				0.069457					0.277614				0.0124454
2.85726				0.934857					0.590684				0.180508				0.382041					0.25948				5.75487					1.86067				0.31759				0.497769					0.2777				0.0124454
0.189932				1.41387					0.590694				0.180796				0.382403					0.481203				2.28272					4.33349				0.168282				0.755136					0.277827				0.0124454
2.85388				0.994906					0.591148				0.181238				0.382465					0.328269				3.04125					0.631475				2.29457				1.37734					0.27796				0.0124454
2.30254				0.751923					0.591385				0.181296				0.382572					0.257387				0.238451					1.88841				0.801841				0.781861					0.278039				0.0124454
0.552355				0.523389					0.591434				0.18136				0.382716					0.282702				3.46444					0.0113379				0.65952				0.284994					0.278244				0.0124454
1.27739				0.0561204					0.591715				0.181543				0.382802					1.21249				0.609519					0.375562				0.525727				0.647658					0.278405				0.0124454
0.411322				1.11096					0.591768				0.181787				0.38351					0.888018				1.45447					0.545579				2.97009				0.431447					0.278559				0.0124454
0.0124452				3.98934					0.592121				0.182289				0.383832					0.202837				1.53346					0.867175				0.0124454				3.96385					0.279038				0.0124454
6.76513				3.00753					0.592422				0.182382				0.384041					0.117157				0.99471					0.96351				0.282736				1.50148					0.279153				0.0124454
1.84852				2.49128					0.592732				0.182669				0.384193					0.266416				0.252056					0.923634				1.61966				0.657045					0.279542				0.0124454
2.67325				3.29278					0.593495				0.182824				0.384335					3.76329				7.72968					0.918338				1.47372				0.300289					0.280199				0.0124454
1.47006				0.217098					0.593656				0.183603				0.384538					0.9037				3.42181					0.542876				0.0879209				1.0872					0.280332				0.0124454
1.18323				0.251157					0.593825				0.183682				0.384621					0.515451				0.941953					0.695723				0.409173				0.0124457					0.280395				0.0124454
2.60145				0.011168					0.593906				0.184011				0.384783					0.435338				0.741265					2.01078				0.261575				0.131234					0.280438				0.0124454
1.45642				0.795802					0.594114				0.184217				0.384868					0.878026				0.306796					0.0111556				0.0123517				0.206695					0.28072				0.0124454
0.0124451				0.158575					0.59418				0.185137				0.385496					0.980065				1.16127					0.0124452				0.64553				1.30421					0.280783				0.0124454
5.32235				5.33036					0.594431				0.185421				0.385927					1.24887				1.74391					2.74883				0.542305				1.29705					0.281275				0.0124454
3.33217				4.45521					0.594441				0.185588				0.386043					2.87527				0.146012					0.126064				1.24477				0.783438					0.281727				0.0124454
6.43954				0.0121927					0.595013				0.185782				0.386125					0.968518				1.74318					1.0954				1.43561				1.24871					0.281942				0.0124454
0.277554				1.13726					0.595022				0.185802				0.386139					2.92537				0.0116868					0.0097712				2.47649				0.096108					0.282256				0.0124454
0.292524				0.794057					0.595368				0.186153				0.386725					1.01982				0.560315					0.894765				0.443882				0.213887					0.282834				0.0124454
3.48457				3.80457					0.595397				0.187029				0.386808					3.65876				3.45492					0.776852				0.799857				0.11853					0.282999				0.0124454
0.340585				0.0124459					0.595528				0.188243				0.387923					0.680344				0.857468					1.21479				0.467952				0.224046					0.283197				0.0124454
0.498511				7.04044					0.595531				0.18834				0.388114					1.34855				5.62352					0.0104625				2.05383				0.67915					0.283283				0.0124454
8.18102				2.15228					0.595931				0.190533				0.388466					1.06754				3.49162					0.969157				0.684661				0.903668					0.283323				0.0124454
4.9279				3.88551					0.596092				0.19059				0.388511					4.33567				1.01211					4.32302				1.22581				1.82057					0.283464				0.0124454
1.98704				0.15143					0.596144				0.190873				0.389261					1.76559				1.01465					0.382303				1.14106				0.833496					0.284235				0.0124454
4.41064				4.31167					0.596145				0.19104				0.389707					0.169052				8.96419					0.253025				0.297804				2.06861					0.28436				0.0124454
1.38881				1.82289					0.596856				0.191137				0.3898					0.0113366				0.316935					1.38443				0.0718331				0.494971					0.284678				0.0124454
7.52828				1.89821					0.596902				0.19131				0.38987					1.04774				3.36711					4.61177				0.291561				0.674797					0.284888				0.0124454
4.28401				1.01372					0.597166				0.191814				0.389888					1.28463				0.38761					0.156546				1.29602				0.23798					0.285015				0.0124454
3.86726				1.25884					0.597415				0.191869				0.390212					0.556159				0.011569					0.0102285				0.570519				2.06084					0.285085				0.0124454
0.923965				0.262048					0.597626				0.192151				0.390258					0.285239				0.941728					1.27633				1.15138				1.89453					0.285704				0.0124454
1.07082				0.268166					0.597819				0.192182				0.390355					0.55205				0.203854					0.715553				0.951741				0.61539					0.285758				0.0124454
1.42037				0.706409					0.598297				0.192271				0.390789					0.663354				0.0124449					0.130656				1.04612				0.00977365					0.285899				0.0124454
1.25846				0.463676					0.59844				0.192639				0.391748					5.66081				1.41566					0.886206				1.78396				1.82685					0.285922				0.0124454
2.93482				3.54767					0.598692				0.193203				0.392495					0.43739				0.136969					3.16517				1.98172				2.04451					0.286437				0.0124454
3.78536				4.31434					0.598901				0.193264				0.392546					1.21583				4.45893					0.994081				0.734249				0.407583					0.286553				0.0124454
5.17404				3.16079					0.599045				0.193522				0.392779					1.48305				1.36713					0.310668				0.010532				1.70075					0.28672				0.0124454
0.944908				0.843588					0.599216				0.194633				0.39284					1.82308				1.35939					0.566205				3.07694				0.187114					0.286761				0.0124454
0.760123				3.00087					0.599569				0.194833				0.392889					1.1819				8.37245					2.01711				0.0107942				0.362731					0.286851				0.0124454
10.125				0.852604					0.599963				0.195028				0.39304					7.00635				1.72187					1.31177				2.21181				1.54505					0.286855				0.0124454
5.55976				2.26006					0.600036				0.195108				0.393065					3.54601				0.957121					0.27125				0.836326				0.908135					0.287107				0.0124454
1.46713				1.16826					0.601644				0.19591				0.39318					0.0520211				0.73102					0.757964				0.0977182				0.340382					0.287353				0.0124454
0.528067				0.527581					0.601757				0.196129				0.393225					3.24215				0.19306					3.43965				1.1986				2.14969					0.287542				0.0124454
1.14618				0.297379					0.602251				0.196708				0.393599					0.724057				0.76847					0.0114626				0.80524				1.3101					0.288161				0.0124454
2.78282				2.41627					0.602333				0.196843				0.393608					1.59821				0.0105949					0.33485				0.607069				0.0115827					0.288895				0.0124454
0.718889				0.553055					0.602504				0.197062				0.394299					2.21857				1.5092					1.73406				0.444189				2.03368					0.289207				0.0124454
0.947079				0.982955					0.602587				0.197105				0.394471					1.60301				0.870489					3.05935				0.241728				2.44182					0.28931				0.0124454
0.68648				2.68226					0.602734				0.197281				0.394947					1.47737				0.610008					0.947735				0.351897				0.159408					0.289393				0.0124455
1.82712				2.25713					0.602908				0.197402				0.396567					0.602123				0.10339					0.764479				0.423294				1.78202					0.29053				0.0124455
1.63031				0.809465					0.603818				0.197846				0.397845					1.86959				0.814246					0.8238				0.40716				1.79295					0.29068				0.0124455
0.416972				1.42454					0.604663				0.197996				0.397984					1.83048				0.930398					0.751038				1.457				0.555751					0.29096				0.0124455
1.40365				1.0061					0.604691				0.198179				0.398339					3.21789				0.0121263					0.600948				1.21205				0.829199					0.291709				0.0124456
3.62429				0.534456					0.604823				0.198203				0.398513					1.02977				2.07388					0.41403				3.85417				3.87918					0.292324				0.0124456
0.966542				0.0119909					0.605249				0.1985				0.398732					0.587997				2.13491					0.795639				0.147508				2.03929					0.292668				0.0124456
2.32773				0.775322					0.605688				0.198785				0.399246					0.576917				3.27868					2.35248				1.78688				0.607665					0.292699				0.0124456
2.94663				0.425178					0.605851				0.199419				0.399362					0.236884				4.41194					0.17189				0.474136				1.4513					0.292813				0.0124457
2.02685				1.26937					0.606044				0.199762				0.399542					0.659937				0.727207					1.62838				0.466492				1.1249					0.292932				0.0124457
0.625303				2.14268					0.606127				0.199771				0.399661					0.263653				2.25329					8.26468				0.836448				2.51992					0.293279				0.0124457
2.4754				6.7356					0.606669				0.199929				0.399958					0.560312				1.66048					0.932338				0.105535				3.03134					0.293431				0.0124457
4.78793				1.91871					0.607029				0.200079				0.400539					2.17731				2.10812					0.827796				3.40715				0.286875					0.29355				0.0124457
0.666676				0.379929					0.60716				0.200186				0.40055					0.355414				2.18631					0.383612				0.777127				0.453086					0.293646				0.0124457
3.57982				1.01049					0.607713				0.200958				0.401035					0.743164				1.61401					1.81158				0.0124449				1.28948					0.293883				0.0124457
1.18764				1.94345					0.607908				0.201003				0.401652					1.48674				2.88057					2.09517				0.311239				1.67548					0.294087				0.0124457
0.765033				0.527664					0.608111				0.201551				0.402727					0.168643				0.61092					0.131369				0.597539				1.28386					0.294113				0.0124457
9.46466				2.18298					0.608157				0.201628				0.403123					2.06722				3.39728					1.92631				6.15921				1.07328					0.294248				0.0124457
5.06713				6.45089					0.60841				0.201969				0.403364					1.62706				7.83789					1.05493				1.13671				0.532167					0.294387				0.0124457
0.864098				0.746594					0.609043				0.202177				0.404038					0.0124449				0.939981					0.658667				0.463622				0.141458					0.294516				0.0124457
3.99012				0.826624					0.609162				0.202354				0.404122					3.13007				0.920512					1.4925				0.0113252				0.602188					0.294594				0.0124457
2.7787				0.726836					0.609292				0.202454				0.404159					0.161482				1.71214					0.127343				1.25997				4.33499					0.294836				0.0124457
2.50711				0.0116965					0.60962				0.202483				0.404263					2.13168				0.587218					0.775928				5.61034				4.04795					0.294999				0.0124457
4.91441				0.851481					0.609687				0.202489				0.404264					0.984284				0.0114171					1.34396				1.50246				1.65397					0.2955				0.0124457
1.76932				0.729417					0.609791				0.202772				0.404545					1.97919				1.33007					0.677681				1.65644				4.68299					0.296108				0.0124457
4.43161				0.4662					0.610858				0.20314				0.404547					0.31642				1.01048					1.16796				0.674011				0.460337					0.29642				0.0124457
2.69168				2.9028					0.611107				0.203339				0.404707					2.72401				2.56744					0.780002				0.670591				0.952228					0.29642				0.0124457
1.8095				2.90244					0.611197				0.203864				0.405339					0.522615				0.264499					8.51431				0.422101				0.290735					0.296596				0.0124457
0.97312				0.873246					0.611543				0.204042				0.405396					1.40457				2.15613					0.79113				0.79467				0.681068					0.297392				0.0124457
3.63604				0.0124459					0.611572				0.204277				0.405484					2.6755				1.62025					0.536083				1.63301				2.39282					0.298159				0.0124457
1.22214				0.454385					0.612635				0.204626				0.405903					0.646532				0.866958					1.25646				0.34048				0.951937					0.298449				0.0124457
2.3657				1.19699					0.613114				0.204638				0.406167					1.17238				1.09504					2.31806				1.21534				2.96905					0.298596				0.0124457
2.79753				4.1151					0.613597				0.205389				0.406246					1.73628				2.93855					0.515228				0.0117918				0.736351					0.2986				0.0124457
2.72446				0.703816					0.614072				0.20543				0.406281					1.97277				3.29017					0.0780012				1.87241				0.327367					0.298699				0.0124457
1.30626				1.52568					0.614341				0.205472				0.406303					2.03285				1.48544					3.32477				0.0124449				1.18698					0.299137				0.0124457
0.778238				0.340142					0.615204				0.206087				0.406511					0.180822				1.32818					2.61037				1.00346				0.406618					0.299494				0.0124457
1.84616				2.86725					0.61537				0.206566				0.406543					3.76255				0.445827					1.59848				0.334711				0.651356					0.300102				0.0124457
10.1623				0.683276					0.615672				0.206823				0.406759					0.566725				1.48058					0.990217				0.0117386				0.762985					0.300169				0.0124457
0.0124379				0.0124449					0.615688				0.206851				0.40676					0.871555				3.16752					1.5264				0.0124454				0.354844					0.300476				0.0124457
4.37838				0.183372					0.616108				0.206932				0.406774					2.8776				0.0124454					0.42792				0.0124459				0.748276					0.300767				0.0124457
1.29361				0.107501					0.616151				0.207065				0.406989					0.83602				3.90502					1.62968				0.12102				0.0110464					0.301099				0.0124457
1.94037				0.111293					0.616532				0.207138				0.407204					0.66361				1.50419					1.86687				0.0124449				1.17435					0.30145				0.0124457
1.32021				0.301307					0.616574				0.207341				0.407381					0.691927				0.773255					1.85276				0.886065				0.191261					0.301527				0.0124457
1.7647				1.12088					0.616595				0.207669				0.407397					0.41939				3.32752					0.374935				0.0117024				0.00996191					0.301735				0.0124457
0.554958				3.02729					0.616615				0.207675				0.407595					0.0124449				2.25404					0.503072				0.503161				0.211246					0.302318				0.0124457
8.16373				2.18978					0.616713				0.20845				0.407636					4.33256				0.148107					1.55358				1.63423				2.84287					0.302337				0.0124457
0.986145				0.110831					0.616845				0.208455				0.407824					1.6469				2.85198					0.194421				0.0101296				0.439361					0.302999				0.0124457
2.70983				0.416748					0.616965				0.208456				0.408238					1.53288				0.180182					1.28203				0.297603				0.705234					0.303651				0.0124457
2.89212				0.793407					0.617044				0.20883				0.408773					0.485479				5.1299					2.22437				1.61507				1.5179					0.304206				0.0124457
1.69879				0.608416					0.617106				0.209761				0.408961					4.41007				1.38304					0.38317				0.966779				1.80071					0.304636				0.0124457
3.34045				0.576765					0.617323				0.209802				0.40915					1.3716				4.02187					1.44181				1.66325				0.768888					0.304704				0.0124457
2.43191				3.68822					0.617514				0.209922				0.409201					0.697089				0.0717013					1.91986				0.0596324				3.00943					0.304925				0.0124457
2.52223				3.9882					0.618259				0.210471				0.40937					2.17288				1.7917					2.82181				0.803743				0.225957					0.30506				0.0124457
2.11402				1.03519					0.618264				0.210821				0.410113					0.449183				0.012046					0.121663				0.438257				1.38405					0.305247				0.0124457
1.21407				0.998109					0.61917				0.211013				0.41023					1.5954				1.92965					3.70008				0.343409				1.62337					0.306253				0.0124457
4.05409				1.32139					0.620105				0.211309				0.410353					2.31244				3.49369					0.62355				1.31549				0.352196					0.306606				0.0124457
0.815342				1.26771					0.620406				0.212022				0.410416					3.40772				2.01207					0.558042				0.0124449				0.205721					0.306772				0.0124457
4.20001				1.03051					0.620753				0.212234				0.410568					0.370921				2.59465					0.725316				1.04174				8.06744					0.307215				0.0124457
2.17411				1.45485					0.621418				0.212471				0.410838					0.410619				0.96504					0.0124452				2.61206				1.72897					0.307513				0.0124457
1.88616				2.56229					0.621608				0.212675				0.411114					7.05298				0.0120266					0.534042				1.16387				0.0343497					0.30803				0.0124457
0.964718				3.20562					0.622637				0.212771				0.411377					4.26037				1.58622					3.36827				3.75575				0.542647					0.308203				0.0124457
1.06343				2.04809					0.622849				0.213201				0.412252					5.75002				2.50129					0.0110316				0.240587				0.789199					0.308312				0.0124457
2.66069				3.44712					0.623188				0.213311				0.41266					0.427651				0.341746					0.225988				3.73198				0.0118754					0.308434				0.0124457
5.109				1.82199					0.623819				0.213373				0.413358					1.84926				1.42944					0.274063				0.949624				2.66701					0.3085				0.0124457
8.16188				1.95228					0.624973				0.213448				0.413961					0.450933				0.509809					2.17381				0.0124449				0.291353					0.308612				0.0124457
7.61862				1.61561					0.625201				0.213806				0.414011					1.43009				0.484436					0.211157				0.532526				1.03927					0.308711				0.0124457
1.03131				2.18672					0.626418				0.213985				0.414021					3.45476				2.01121					1.14666				0.896506				0.809132					0.309127				0.0124457
1.39204				1.78395					0.626725				0.214157				0.415067					0.735325				0.198237					1.44762				0.407208				2.37155					0.309494				0.0124457
3.02252				2.67863					0.626893				0.21461				0.415249					0.248089				0.153839					0.0915444				2.98585				6.68593					0.30958				0.0124457
1.4181				2.36933					0.626942				0.214836				0.415397					0.720832				0.601161					0.438641				0.63023				1.57317					0.309595				0.0124457
2.12886				0.0109278					0.627001				0.214845				0.415584					0.196242				0.718032					0.333869				0.603847				1.52145					0.309661				0.0124457
0.469539				1.73917					0.627151				0.215464				0.415935					0.70812				0.43261					0.290113				1.79565				0.291963					0.309718				0.0124457
1.37121				0.830777					0.62727				0.215482				0.416171					0.716062				0.388968					0.5024				9.18299				1.19282					0.309805				0.0124457
0.934966				1.33185					0.627405				0.216697				0.416225					2.45447				1.01088					1.74985				2.14759				0.0124457					0.310335				0.0124457
1.73341				10.9217					0.627421				0.216835				0.417233					1.14594				1.85355					0.648894				0.0124454				1.26386					0.310377				0.0124457
2.18653				4.82859					0.627687				0.217055				0.417295					0.38071				0.215843					0.617978				0.0124449				0.948462					0.310514				0.0124457
1.70795				1.49143					0.627867				0.217243				0.417408					0.881313				0.911692					0.72473				0.526038				0.266217					0.311302				0.0124459
0.0124449				5.92018					0.628072				0.217582				0.418593					0.661019				2.0709					1.75058				1.68312				0.011721					0.312084				0.0124459
0.0124449				4.51036					0.628516				0.21771				0.4186					3.16067				6.58757					2.11452				3.62322				1.7229					0.312165				0.0124459
2.83587				1.00498					0.628839				0.217748				0.418925					0.416744				0.253877					0.236082				5.64436				0.949886					0.312278				0.0124459
0.448876				7.56634					0.628905				0.218411				0.418926					0.771158				0.488674					1.06649				0.111916				0.129365					0.313483				0.0124459
2.03611				0.563552					0.628932				0.218525				0.418967					2.51578				0.695801					0.290516				0.0760976				0.393173					0.313624				0.0124459
7.05151				0.42417					0.629283				0.219196				0.419368					1.06958				1.99946					1.05588				1.28844				1.89252					0.31415				0.0124459
9.0783				1.31007					0.629683				0.2198				0.419877					3.11647				2.07579					0.887416				0.548586				0.25536					0.314461				0.0124459
2.15139				1.37675					0.629687				0.22039				0.419888					1.35293				2.58276					1.4531				0.0117522				0.225446					0.314501				0.0124459
2.69414				0.314867					0.629877				0.220665				0.420554					3.25332				1.01465					0.768208				0.296248				0.581253					0.314712				0.0124459
5.65412				0.0124459					0.62997				0.221581				0.42116					0.614388				1.02669					0.373208				0.54339				1.84511					0.316398				0.0124459
4.75812				1.52356					0.630127				0.221621				0.421195					0.377114				0.420585					2.23399				0.720844				1.42894					0.316942				0.0124459
0.0124454				2.71895					0.630181				0.221677				0.421326					1.69124				3.77884					2.3161				0.340206				0.53979					0.317469				0.0124459
0.0120879				0.00919921					0.6302				0.221738				0.421348					0.743408				0.0105706					0.446017				2.39031				0.31118					0.31784				0.0124459
0.0116597				0.37191					0.631125				0.221988				0.422047					2.64846				3.83222					0.569087				4.4507				1.75297					0.317978				0.0124459
0.836205				0.781934					0.631172				0.22202				0.422721					0.643822				3.27267					2.84183				0.091852				0.530486					0.318224				0.0124459
0.585279				2.23326					0.631443				0.222053				0.422735					4.4532				3.03435					0.548311				1.12593				0.534682					0.318467				0.0124459
0.0114777				0.59515					0.631614				0.222245				0.423277					2.37206				0.899341					2.57485				0.540387				0.577105					0.318947				0.0124459
1.56369				0.886506					0.631676				0.222282				0.423821					1.31431				1.0208					1.49084				1.92713				0.0120082					0.320035				0.0124459
1.47957				1.50957					0.631813				0.223255				0.424087					0.791759				0.860515					0.852788				0.207624				1.01477					0.32009				0.0124459
3.11088				0.762992					0.632331				0.223668				0.425749					2.14465				0.840426					1.87382				0.286754				2.32204					0.320966				0.0124459
3.1702				0.878057					0.632802				0.223852				0.426193					0.790609				4.47147					0.216798				0.426001				0.0420052					0.321455				0.0124459
1.77915				1.5594					0.632836				0.224044				0.426257					0.590577				0.316101					5.21016				3.00918				0.987818					0.321998				0.0124459
5.81157				0.186336					0.633033				0.224154				0.42696					0.803413				1.31703					0.241762				1.90887				1.07484					0.322359				0.0124459
3.42454				0.903856					0.633074				0.224523				0.426963					3.49524				0.239608					1.07739				0.712228				1.20845					0.322709				0.0124459
2.96519				0.462783					0.633939				0.224659				0.427063					0.418257				2.69158					1.05932				0.61311				3.97198					0.323388				0.0124459
1.56127				0.0124449					0.633996				0.224863				0.427082					2.22949				0.930148					1.28939				0.948009				0.966126					0.323588				0.0124459
0.191496				0.830193					0.634197				0.225067				0.427888					3.37167				6.55755					0.397655				2.94811				0.422205					0.323602				0.0124459
0.0124452				0.858936					0.634254				0.225284				0.427971					1.92313				2.55213					1.30861				1.64854				1.00312					0.32381				0.0124459
4.65822				2.31743					0.634373				0.225342				0.428008					3.26164				5.60061					0.642063				0.0124454				1.3663					0.32386				0.0124459
4.08911				0.972829					0.634733				0.225733				0.42853					1.83341				3.38184					0.987606				0.34446				0.752876					0.324073				0.0124459
0.987964				1.11373					0.634882				0.226656				0.428985					0.435995				0.338033					0.261855				0.484209				3.32243					0.324611				0.0124459
1.00738				1.55089					0.635014				0.226838				0.429478					0.48312				0.774548					1.38717				0.115088				0.197503					0.324718				0.0124459
6.17476				0.709189					0.635437				0.226891				0.429576					1.63583				0.0894112					1.86655				0.21589				1.60011					0.324762				0.0124459
2.6235				0.791798					0.63568				0.226961				0.429712					1.24648				0.733369					0.440479				1.33369				1.15281					0.32514				0.0124459
0.621897				0.275907					0.635688				0.2273				0.430115					0.331749				0.605235					0.694382				0.0116543				1.75875					0.325417				0.0124459
2.7243				0.580352					0.63604				0.227471				0.430126					5.87739				1.89072					0.335856				0.13683				0.615193					0.325648				0.0124459
5.608				0.279509					0.636167				0.227524				0.430379					2.23295				0.263677					0.655438				1.22618				0.842092					0.325934				0.0124459
5.17168				0.831488					0.636486				0.227985				0.430614					0.384434				1.82087					0.880883				0.442816				7.98272					0.326894				0.0124459
3.54496				2.87946					0.636614				0.22835				0.430664					0.959276				1.68716					0.605293				0.422789				1.25227					0.32711				0.0124459
3.02807				4.25559					0.637126				0.228839				0.430789					1.19957				2.4574					3.49648				9.21154				0.19984					0.327163				0.0124459
0.62767				1.21053					0.637157				0.228874				0.431422					1.31789				0.0118413					0.950891				2.1182				0.333414					0.327235				0.0124459
1.00752				1.97617					0.637344				0.229443				0.432059					3.28456				2.76562					0.424293				0.388218				0.367089					0.327242				0.0124459
0.434589				5.34922					0.638158				0.230775				0.432416					3.09519				1.89971					0.975836				1.78773				0.248349					0.327357				0.0124459
9.11999				0.392739					0.638479				0.231074				0.432445					0.955706				1.1277					3.04544				0.513927				0.805838					0.327579				0.0124459
2.10621				1.05639					0.638629				0.231695				0.432633					1.30359				1.29446					1.17676				0.199057				0.763162					0.327745				0.0124459
3.27616				0.0112209					0.638652				0.231967				0.432641					0.299115				2.58272					0.252615				0.37955				0.204741					0.328486				0.0124459
2.78935				1.51233					0.638737				0.232277				0.432753					2.19218				0.558161					0.866055				1.39344				0.215859					0.328773				0.0124459
12.3414				0.543045					0.638789				0.23274				0.432924					0.827121				1.47244					1.97113				0.168111				2.28605					0.328906				0.0124459
0.530606				1.6715					0.638795				0.232867				0.432972					1.85156				7					1.16313				3.11086				0.571616					0.328925				0.0124459
1.64357				1.97012					0.63915				0.232894				0.43304					1.79011				0.16329					3.32904				1.95476				1.87159					0.329606				0.0124459
1.39863				3.83473					0.639281				0.233072				0.433057					0.322664				1.84593					1.05838				0.595287				1.35239					0.329606				0.0124459
2.84615				0.0121862					0.639436				0.234154				0.433201					1.72058				0.0124146					5.83085				0.747463				0.377791					0.330706				0.0124459
2.20614				15.175					0.639449				0.234227				0.434084					0.0813236				3.20194					1.6919				1.87851				0.318308					0.330788				0.0124459
5.7502				5.57898					0.639979				0.234255				0.434376					1.10366				0.21893					1.02031				1.19676				0.526745					0.330874				0.0124459
1.29317				0.421766					0.640684				0.234566				0.434428					6.01862				2.35042					0.943016				1.06722				0.0124452					0.331174				0.0124459
3.38755				0.106068					0.640744				0.234704				0.434777					0.15166				0.0113421					0.785369				1.34349				0.706342					0.331436				0.0124459
0.269885				0.0124449					0.640924				0.234811				0.43487					0.010862				4.17842					3.30541				2.30824				2.99309					0.331803				0.0124459
0.599978				2.47764					0.641039				0.234904				0.435					0.283819				2.98509					0.841224				1.68489				0.492131					0.331917				0.0124459
4.10038				2.02732					0.64107				0.235408				0.435167					2.36				1.24545					0.362626				1.44606				0.253659					0.332052				0.0124459
1.35189				0.0124449					0.641135				0.235527				0.435565					0.308932				2.01422					0.0691747				1.3524				0.0124452					0.33206				0.0124459
0.0124449				2.55885					0.641512				0.236127				0.435679					0.25909				0.0109941					7.23338				1.24965				0.008563					0.332164				0.0124459
4.41852				11.6682					0.641789				0.23623				0.437422					0.707273				0.427642					0.0951026				0.58385				1.51557					0.332504				0.0124459
1.30564				3.15654					0.64229				0.236758				0.437454					0.98459				1.31282					1.12891				0.426514				1.4445					0.332843				0.0124459
0.689408				2.66052					0.64241				0.236846				0.437645					0.271146				0.678752					0.888438				0.463489				1.14737					0.333007				0.0124459
2.26758				1.8402					0.642662				0.237116				0.437836					0.878199				0.0121806					1.45423				0.221391				0.512519					0.33314				0.0124459
2.29603				2.45574					0.642878				0.2372				0.43788					1.77334				2.863					0.786062				2.26221				0.605767					0.333415				0.0124459
1.77756				1.73176					0.64301				0.237378				0.438215					0.978963				2.83514					0.598538				3.58946				2.07291					0.334037				0.0124459
3.37718				2.22411					0.643367				0.237683				0.438217					0.586679				0.0106827					1.74552				0.693548				0.620548					0.334379				0.0124459
0.50368				3.0805					0.643567				0.237802				0.438314					0.568482				2.20419					0.240311				0.268423				1.89102					0.334484				0.0124459
1.73249				0.789446					0.643779				0.237834				0.438323					0.923515				0.0113577					0.353071				3.22776				6.95712					0.334511				0.0124459
2.45996				2.31272					0.644171				0.238055				0.438472					1.22497				0.909692					0.836409				0.258461				6.74214					0.33453				0.0124459
1.12123				0.0124469					0.644261				0.238181				0.439059					2.5805				1.2985					1.05458				0.52372				0.146057					0.334687				0.0124459
4.72449				7.30569					0.644843				0.238809				0.439061					1.46274				0.682865					0.72951				0.471123				0.681652					0.334816				0.0124459
1.88268				1.86851					0.644917				0.239899				0.439156					0.633956				6.26317					0.103136				0.495731				0.908399					0.335009				0.0124459
1.32631				0.504732					0.645473				0.239921				0.4399					7.25994				0.447372					1.26431				0.477447				0.302439					0.33502				0.0124459
1.51019				0.304803					0.645553				0.239952				0.440083					0.328037				1.97032					2.54947				1.18104				0.466462					0.335155				0.0124459
1.05732				1.7085					0.645649				0.239992				0.440564					0.0124449				2.73075					1.05041				0.5017				0.904017					0.335706				0.0124459
1.14253				1.32902					0.646278				0.240075				0.44067					1.23096				0.593384					2.11116				0.0112772				1.40971					0.336043				0.0124459
0.593671				2.75518					0.64652				0.241005				0.440752					1.79124				1.31716					0.112753				0.123938				0.718902					0.336063				0.0124459
1.08722				2.69198					0.64663				0.24149				0.441054					1.04561				0.714888					0.441351				1.3182				1.40563					0.33621				0.0124459
1.22864				1.82884					0.646922				0.241594				0.441084					3.97729				1.6225					2.46994				1.93978				0.0115865					0.337447				0.0124459
6.96557				2.49472					0.647074				0.24186				0.441426					3.27298				5.57522					0.61483				1.41649				1.04067					0.337777				0.0124459
0.0106938				2.59408					0.647521				0.242013				0.441791					2.92554				2.27565					2.44773				0.0121146				0.600217					0.338316				0.0124459
3.61036				4.27098					0.647655				0.242244				0.441916					1.83983				1.15742					1.13545				0.995665				0.0116861					0.338332				0.0124459
1.80236				0.245919					0.648175				0.242297				0.442687					0.917279				3.02563					3.14612				0.338421				0.328537					0.338364				0.0124459
1.82822				5.2801					0.648407				0.242326				0.442989					0.542866				0.0121472					1.47017				0.637652				1.46561					0.338694				0.0124459
0.579683				0.906986					0.64879				0.242426				0.443165					0.00881628				2.78849					1.01512				0.652074				0.109069					0.338745				0.0124459
0.00983442				1.98122					0.64883				0.242709				0.443238					0.889662				0.913047					0.606907				0.673327				0.2463					0.339423				0.0124459
2.1469				1.67161					0.648894				0.242789				0.443278					1.24724				0.0123658					7.85669				0.00960638				0.286143					0.340419				0.0124459
0.897307				1.52726					0.6493				0.243136				0.443357					0.0112218				0.524677					0.607645				0.727933				5.81902					0.340838				0.0124459
4.42834				0.434241					0.649498				0.243291				0.44415					1.04817				0.011425					3.88426				0.45504				0.989101					0.340873				0.0124459
0.775922				2.09896					0.649871				0.243324				0.444279					2.85476				0.565291					2.18475				0.243808				0.801934					0.340899				0.0124459
0.0124452				0.465811					0.650317				0.243865				0.444403					1.41257				2.56599					1.64622				0.217054				0.630394					0.340976				0.0124459
0.998611				0.863173					0.650548				0.243967				0.444458					1.78265				0.452007					0.333094				0.458156				1.99925					0.34114				0.0124459
1.90732				3.15794					0.651252				0.244015				0.444599					0.402591				5.78484					2.33739				2.03035				3.76012					0.341157				0.0124459
1.06986				1.93035					0.6521				0.244546				0.444829					0.460365				2.07375					0.157439				2.1803				0.13484					0.34131				0.0124459
0.0124452				0.505957					0.652205				0.244796				0.444918					0.012146				2.18169					0.127989				1.35006				1.1492					0.341985				0.0124459
1.2061				1.39316					0.652664				0.245165				0.445574					1.26623				1.04802					1.22223				3.75988				0.367566					0.34239				0.0124459
6.47661				2.71527					0.652681				0.245199				0.44559					0.25666				2.08549					0.0532182				0.378997				0.147512					0.342558				0.0124459
4.10463				0.0117895					0.652687				0.245495				0.445702					0.637107				0.48349					0.102261				0.840629				0.712772					0.342698				0.0124459
1.56346				0.504764					0.652922				0.245668				0.445909					3.323				0.73692					2.04532				0.688712				4.64656					0.342961				0.0124459
0.669567				1.23257					0.653245				0.245691				0.44641					0.295746				1.38696					0.858331				0.00945956				0.876502					0.343109				0.0124459
1.56381				2.65426					0.653249				0.246201				0.446509					1.23675				0.736374					2.13194				0.393262				1.18884					0.344158				0.0124459
12.5895				5.25983					0.653407				0.24628				0.44664					2.26731				0.666612					0.158971				1.38587				0.0124457					0.344636				0.0124459
0.823679				0.0124449					0.653827				0.246296				0.447137					0.495723				0.0922008					1.60971				1.03894				1.02041					0.344742				0.0124459
0.829935				0.0114766					0.653935				0.246387				0.447618					0.947807				2.0454					1.71818				1.69678				1.88726					0.344818				0.0124459
1.24351				4.99594					0.654065				0.246577				0.447948					0.455344				3.11734					1.18778				1.36188				1.67236					0.345146				0.0124459
8.58753				0.959824					0.654084				0.246923				0.448836					2.34098				0.154119					0.691805				0.0124459				1.00367					0.345359				0.0124459
0.0112061				5.76114					0.654392				0.247075				0.44888					0.714733				0.443703					0.0961886				0.216369				0.0124457					0.345395				0.0124459
0.956558				1.93794					0.654424				0.247392				0.448962					0.0124454				3.17554					0.986689				4.19702				0.05596					0.345416				0.0124459
1.29084				3.23848					0.654459				0.247464				0.449172					2.82154				2.66937					2.13393				0.644947				0.540546					0.345441				0.0124459
0.0123672				1.88264					0.654519				0.248069				0.449308					1.71136				0.537852					2.19948				0.659416				3.60544					0.345586				0.0124459
2.7644				6.59712					0.654824				0.24833				0.449654					1.38983				1.43727					0.0124452				3.46832				0.391135					0.345834				0.0124459
2.08542				0.863782					0.654914				0.248537				0.449675					0.915787				0.541844					1.43771				0.620117				7.73551					0.346076				0.0124459
1.22518				1.79719					0.655717				0.248789				0.449964					1.63409				1.56337					2.17227				0.385856				0.344857					0.346542				0.0124459
1.51482				2.05396					0.656044				0.249105				0.450015					0.77632				0.333439					0.592582				0.0124449				0.569587					0.346791				0.0124459
0.482287				0.374002					0.656099				0.249196				0.450016					1.31159				1.84608					0.460114				0.749211				1.4085					0.346988				0.0124459
0.437914				3.82616					0.657057				0.249212				0.450267					1.83434				3.12431					1.68143				0.356168				1.4014					0.34709				0.0124459
6.90103				5.99914					0.657359				0.249403				0.450392					0.0109164				0.980837					1.55202				0.804538				0.373223					0.347595				0.0124459
1.521				2.82819					0.657388				0.249865				0.45086					1.49757				0.661524					1.46919				0.810577				0.514547					0.347645				0.0124459
1.9468				0.0113865					0.657418				0.250208				0.450983					0.716578				1.22259					1.40867				1.04662				3.80773					0.348461				0.0124459
2.94574				2.26394					0.657491				0.250408				0.451027					0.433185				0.811662					0.290558				0.938686				1.63724					0.348762				0.0124459
1.54416				4.75604					0.658134				0.25081				0.451215					1.4255				1.65099					0.0727131				0.547194				0.682287					0.349055				0.0124459
0.87252				2.59893					0.659696				0.251162				0.451407					0.0120128				1.28327					0.0124452				0.343343				0.390341					0.349087				0.0124459
1.84619				0.80739					0.660445				0.251351				0.451473					0.661787				0.0119053					0.186439				1.20214				0.235207					0.3495				0.0124459
2.90051				0.697634					0.660522				0.251444				0.451547					1.36359				1.24542					0.265608				0.579697				0.0124457					0.349842				0.0124459
1.46706				1.00195					0.660579				0.252025				0.451849					0.328656				0.276003					0.679551				2.03791				0.158925					0.350108				0.0124459
5.18528				2.96702					0.660649				0.252112				0.452046					2.55306				0.420704					0.782156				23.8545				2.54868					0.350982				0.0124459
4.49768				1.88982					0.661079				0.252321				0.452073					0.113465				0.771825					0.838629				1.14584				0.471196					0.351164				0.0124459
1.78568				0.780747					0.661992				0.252322				0.452193					0.975475				0.683056					1.08015				2.85654				1.02808					0.351294				0.0124459
1.61076				2.00577					0.662276				0.252422				0.452298					0.358915				5.32739					0.705239				0.912784				1.03763					0.351355				0.0124459
2.57784				1.7697					0.664367				0.252494				0.452827					0.761003				0.416925					1.75972				0.152813				3.04816					0.352139				0.0124459
0.508139				0.37781					0.664866				0.252502				0.452842					1.80122				3.19603					0.908695				2.08866				1.4088					0.352311				0.0124459
2.59023				0.350391					0.665188				0.252735				0.452992					0.0103902				2.22653					0.353752				1.53203				1.26188					0.352442				0.0124459
0.836245				0.72359					0.665755				0.252824				0.453133					0.323856				2.55349					0.0124452				0.726351				0.0124452					0.352558				0.0124459
1.26367				1.14316					0.665845				0.252922				0.453195					0.657353				0.605507					2.88914				0.0124454				0.809714					0.352629				0.0124459
0.711055				1.71759					0.666139				0.253058				0.453249					0.995699				1.23238					0.376446				0.377322				1.21815					0.353125				0.0124459
4.23943				12.5651					0.66664				0.253518				0.45385					0.634135				0.914442					6.37391				0.18283				1.09492					0.353134				0.0124459
3.46974				0.919601					0.666874				0.253566				0.454057					3.75738				0.854333					2.50846				2.71386				0.82208					0.353407				0.0124459
2.3337				0.841233					0.667081				0.253667				0.45435					0.348812				6.71038					0.410915				1.56002				0.408148					0.353582				0.0124459
1.09527				0.923701					0.667127				0.253948				0.454421					0.813104				0.964901					3.09202				1.42542				0.443134					0.353656				0.0124459
0.409192				0.0124449					0.667226				0.254183				0.455267					2.51456				1.60493					0.0118492				0.792472				1.46369					0.35393				0.0124459
1.49114				0.54032					0.667259				0.254396				0.456044					0.712023				0.453165					4.76877				1.11941				1.40395					0.353985				0.0124459
0.480595				5.01831					0.667481				0.254578				0.456295					0.298323				1.54031					0.241402				0.439508				0.383601					0.354153				0.0124459
1.25935				0.870232					0.668255				0.255008				0.456696					0.952313				0.564222					0.535567				0.0110829				0.0124452					0.354341				0.0124459
0.808448				3.58918					0.668882				0.255057				0.4567					0.635384				2.09977					0.699835				0.776386				1.23583					0.35479				0.0124459
0.709619				4.01032					0.668891				0.255546				0.457006					7.60753				0.569877					2.5648				0.396492				0.0124452					0.355423				0.0124459
0.72084				5.06393					0.669508				0.255613				0.457122					0.0630566				1.89091					0.121778				1.3651				2.43875					0.355554				0.0124459
3.28059				0.943035					0.669881				0.255637				0.457227					0.216793				0.49619					0.472166				0.413297				2.12375					0.355614				0.0124459
1.63708				0.65938					0.669945				0.255937				0.45727					0.768747				1.75885					4.80078				1.91559				2.12081					0.355645				0.0124459
4.05602				6.33927					0.670506				0.256508				0.457306					1.16207				0.172196					0.8206				0.874122				0.581518					0.355767				0.0124459
3.01223				2.35318					0.670643				0.257007				0.457888					0.349632				11.0334					0.295958				0.691124				5.97821					0.356434				0.0124459
3.64578				2.24434					0.670844				0.25735				0.45815					0.811477				5.89916					0.65959				2.64817				0.312982					0.356919				0.0124459
1.43599				0.0119611					0.671396				0.257536				0.458512					1.0719				0.686052					0.26011				0.333547				1.6933					0.357263				0.0124459
2.86247				1.33996					0.671787				0.258383				0.459244					0.900883				3.2117					0.526896				0.643902				1.34541					0.357545				0.0124459
5.82924				0.714848					0.671841				0.258622				0.460083					0.433217				0.659291					0.0124452				0.518058				1.23506					0.357601				0.0124459
1.2523				0.344622					0.671942				0.2592				0.460247					2.51862				0.23545					0.378744				1.23499				1.92895					0.357915				0.0124459
1.60032				4.44813					0.672087				0.259378				0.460538					0.73854				2.68804					0.540198				1.40068				1.731					0.358215				0.0124459
5.08162				1.2297					0.672341				0.259635				0.460708					1.71169				2.64439					0.766843				7.58232				0.911267					0.358367				0.0124459
2.25878				2.4327					0.672967				0.260329				0.460901					0.32827				2.6207					0.194551				1.93564				1.42759					0.359474				0.0124459
5.90542				2.27859					0.672988				0.260672				0.4612					0.690455				3.87511					0.039378				0.00964564				0.00954574					0.36017				0.0124459
3.38124				0.645271					0.673256				0.260773				0.46128					2.65573				1.08059					0.29984				2.34675				0.309008					0.360858				0.0124459
3.35315				0.739511					0.673272				0.260901				0.461309					1.23377				0.633846					1.74828				0.220567				1.26242					0.361013				0.0124459
3.98923				0.203958					0.673312				0.26141				0.461455					0.303261				0.394073					3.95672				0.509836				0.687316					0.361426				0.0124459
2.7319				0.0124459					0.673351				0.261939				0.461755					3.52005				0.907966					3.46598				1.41663				1.19073					0.362219				0.0124459
0.856045				0.996843					0.67359				0.261959				0.461839					0.36257				0.635155					0.193701				1.13515				1.25312					0.362346				0.0124459
2.89596				0.187438					0.673754				0.262023				0.461916					2.62669				7.95299					0.0101772				2.22203				1.19777					0.362362				0.0124459
2.9278				0.829474					0.673944				0.262173				0.462093					2.88843				4.04884					0.621128				0.911059				0.30245					0.362434				0.0124459
6.2623				0.815158					0.67459				0.262451				0.462315					1.3397				0.0124452					1.17338				1.39527				3.47546					0.362493				0.0124459
3.74399				0.582314					0.674798				0.262461				0.462501					0.741669				2.17168					0.0124452				7.52972				0.426206					0.36252				0.0124459
1.99923				0.413662					0.674858				0.26257				0.463726					1.6522				0.667573					0.155414				1.39349				1.55022					0.362544				0.0124459
1.55215				1.05863					0.675019				0.262625				0.464079					0.478549				0.0124452					0.300024				1.59626				0.872349					0.363201				0.0124459
1.77947				2.14081					0.675977				0.26286				0.46412					0.010802				1.56509					0.0124447				0.864519				0.506814					0.363268				0.0124459
0.897482				0.0124039					0.676276				0.263277				0.464377					2.88985				0.0105187					0.149397				0.862537				0.927841					0.364624				0.0124459
2.33651				2.87416					0.676442				0.263399				0.464399					1.7561				0.221663					0.173103				0.321079				1.62004					0.365644				0.0124459
1.03386				0.973865					0.67774				0.263786				0.465167					0.160149				1.56743					2.53441				2.01926				0.905018					0.365781				0.0124459
3.00874				0.802442					0.677969				0.26412				0.465187					0.824253				0.760942					1.07187				0.501235				1.95145					0.365834				0.0124459
1.73054				0.430223					0.678007				0.264704				0.465856					1.39196				2.54945					0.817705				1.27447				1.34354					0.366221				0.0124459
1.54784				4.90586					0.678039				0.265055				0.465885					1.25122				4.27031					1.05242				1.04515				0.341097					0.366377				0.0124459
0.836855				1.02198					0.67807				0.265069				0.465961					0.596581				0.0124452					1.49958				8.59738				4.03118					0.366645				0.0124461
1.59298				1.06182					0.678103				0.265074				0.466059					3.35591				2.95911					1.26051				1.33846				0.31487					0.366899				0.0124461
0.0110193				1.26187					0.678814				0.265635				0.466266					1.33053				1.33533					1.32219				2.95705				3.40411					0.367172				0.0124461
0.802764				1.98764					0.678998				0.266532				0.466644					0.011512				6.9725					0.0124452				2.03413				3.40908					0.367618				0.0124461
1.36004				1.10328					0.679065				0.266716				0.466914					0.011521				2.6251					0.440019				3.00581				1.11773					0.367696				0.0124461
2.25051				0.390642					0.679097				0.267281				0.467202					0.604473				2.273					0.153163				0.77229				1.04529					0.368006				0.0124461
5.17962				0.226297					0.679219				0.267345				0.467257					1.31149				2.27136					1.20967				3.52392				1.56466					0.368042				0.0124461
2.64788				1.06599					0.679309				0.267826				0.467362					2.16943				0.0110346					0.935502				0.0122019				4.98448					0.368132				0.0124461
0.930171				1.03609					0.679311				0.268072				0.467387					1.77872				2.97397					0.0123351				3.1575				0.711696					0.368294				0.0124461
11.7076				0.011348					0.679419				0.268316				0.467515					0.093552				0.0113145					0.187803				2.51791				0.96774					0.368515				0.0124461
1.75389				2.05525					0.679506				0.268404				0.467543					0.609528				0.871325					0.116891				1.66375				2.16473					0.368659				0.0124461
0.678147				6.98571					0.679574				0.268421				0.467658					0.682543				11.2997					1.58455				9.23947				0.261552					0.368713				0.0124461
0.913171				3.09272					0.67999				0.268489				0.467893					1.42119				1.43232					0.19293				5.44999				0.00948301					0.368779				0.0124461
0.880613				1.89741					0.681239				0.26893				0.468033					3.74822				3.00492					3.07038				1.79157				0.830499					0.36905				0.0124461
1.98611				0.568017					0.681866				0.269388				0.46864					0.765242				0.0117719					0.768864				0.612649				1.7215					0.369276				0.0124461
2.0694				1.75574					0.682298				0.269483				0.468797					1.13334				1.55996					3.75857				2.07669				0.46069					0.370724				0.0124461
2.38702				0.374083					0.682878				0.270456				0.468994					0.172617				1.39331					0.916778				0.398497				0.2835					0.370952				0.0124461
1.52098				0.879751					0.683483				0.270475				0.469826					0.591481				1.97411					0.0124452				1.25813				0.228693					0.371836				0.0124461
0.452418				0.258096					0.683652				0.270661				0.469987					7.68513				2.47955					2.7038				0.437112				0.459727					0.371852				0.0124461
1.36268				0.68006					0.683695				0.270854				0.470199					1.41788				0.851186					1.61824				1.29116				0.796114					0.372267				0.0124461
2.37988				0.467786					0.684499				0.270968				0.470321					0.647061				5.98602					5.66077				1.22842				3.8214					0.372627				0.0124461
3.7362				0.452765					0.684549				0.271168				0.470598					1.23263				2.59604					0.0124107				0.700251				2.1757					0.372744				0.0124461
0.261859				3.18265					0.684683				0.27119				0.470666					1.47933				0.289652					0.545869				4.75213				0.676332					0.372778				0.0124461
0.682436				1.04882					0.68515				0.271275				0.470879					1.61562				3.13772					0.158916				0.511867				0.107826					0.373487				0.0124461
3.33444				1.10482					0.685582				0.271967				0.470925					0.403501				2.27099					2.99043				0.0123412				1.6756					0.373853				0.0124461
0.671955				3.09416					0.685617				0.271994				0.471514					0.983361				3.77861					1.41371				0.0124454				3.42564					0.373887				0.0124461
0.442087				1.90492					0.6867				0.272008				0.472066					0.560596				1.97897					0.731485				2.70845				1.71826					0.373931				0.0124461
2.7831				0.698067					0.687265				0.272074				0.472079					1.44704				0.198689					3.51933				1.95646				2.10337					0.374009				0.0124461
4.77896				3.9671					0.687816				0.272112				0.472144					1.45537				2.63155					0.830923				0.849862				0.301111					0.374155				0.0124461
0.0124459				5.01215					0.688338				0.272266				0.472442					3.13873				1.2767					0.0124459				0.0114291				0.488069					0.374715				0.0124461
9.44648				3.06013					0.688683				0.272342				0.472743					1.06574				5.98844					0.00966824				1.44437				1.04766					0.374734				0.0124461
7.66216				6.20854					0.689015				0.272519				0.472748					1.47651				0.114274					3.73395				0.430952				1.05792					0.375258				0.0124461
1.35827				0.36702					0.689073				0.272781				0.472839					2.40615				0.0117963					0.751361				0.541658				0.599738					0.375538				0.0124461
14.1079				2.35661					0.690693				0.272803				0.473242					0.121473				11.17					2.21473				0.0124454				1.09414					0.375728				0.0124461
7.03258				2.97814					0.6911				0.273319				0.473254					1.01061				2.62331					1.51976				4.50727				0.0913287					0.376632				0.0124461
2.35211				1.68043					0.691497				0.273343				0.473879					1.25929				1.2568					0.868233				4.53796				0.928734					0.376855				0.0124461
4.7299				2.4995					0.692133				0.273778				0.473989					2.35835				1.74699					0.158061				0.564377				1.26392					0.37702				0.0124461
3.55818				2.61427					0.692161				0.274107				0.474125					0.340822				0.85973					1.28388				3.22431				0.146593					0.378222				0.0124461
2.12574				0.290873					0.692811				0.274248				0.474504					2.44432				0.612014					3.27891				1.36139				0.263986					0.378472				0.0124461
7.75934				0.462432					0.692911				0.274513				0.474895					0.622593				0.011519					1.04784				0.450636				0.0112419					0.378536				0.0124461
1.55419				2.67246					0.693124				0.275036				0.475126					0.788865				3.47229					2.25086				1.10621				0.00947929					0.378813				0.0124461
1.18433				5.19172					0.693364				0.275244				0.47539					1.41656				1.33191					0.90034				0.53098				2.08909					0.378851				0.0124461
0.200848				0.44929					0.693438				0.275314				0.475599					0.506593				1.23887					0.601009				0.0124449				0.0115366					0.378907				0.0124461
1.16362				0.87574					0.693682				0.275672				0.47566					0.315114				2.88817					4.10946				0.0118237				0.95585					0.379075				0.0124461
0.404116				0.279993					0.69386				0.275804				0.475681					1.57548				1.7926					1.30803				0.804316				0.189508					0.379453				0.0124461
0.6334				1.07795					0.693985				0.276083				0.475862					0.555621				0.523893					3.61293				0.307791				0.25294					0.380918				0.0124461
1.20436				0.010252					0.694213				0.276388				0.476121					0.500817				1.90266					0.922562				0.0124449				3.1909					0.381285				0.0124461
0.531325				1.34105					0.694376				0.276879				0.476378					1.47335				0.219819					3.56672				1.32034				0.525679					0.381352				0.0124464
8.45191				2.4465					0.694381				0.277244				0.476432					0.612576				7.32692					0.159878				0.985935				1.80654					0.381471				0.0124464
0.992615				0.836324					0.694466				0.277786				0.476841					1.15492				2.42754					0.0124452				0.0124449				0.658602					0.382174				0.0124464
0.0124459				2.0158					0.69457				0.277857				0.477017					1.36472				1.98034					1.1906				1.84802				0.510985					0.382307				0.0124464
0.151055				2.04836					0.694812				0.278605				0.478267					0.101991				1.1421					1.29607				0.674522				2.52656					0.382479				0.0124464
5.26653				0.416598					0.694967				0.278815				0.478414					0.734017				1.68647					3.1255				2.53388				0.360715					0.382515				0.0124464
1.43287				0.950124					0.69559				0.2789				0.478438					1.85901				0.13841					0.423375				2.39657				0.134138					0.382878				0.0124464
5.93855				0.23742					0.695727				0.279184				0.478535					0.793312				0.0101835					1.03921				1.08071				0.784654					0.383399				0.0124464
2.6077				2.6753					0.695886				0.279463				0.478604					0.184064				0.554908					0.637052				0.0124454				0.880529					0.384093				0.0124464
4.31697				2.93373					0.695971				0.280012				0.47872					0.216934				3.33991					0.992547				1.46784				3.08232					0.384118				0.0124464
1.02939				2.09172					0.6961				0.280131				0.478735					2.60188				2.60123					0.956797				1.24649				0.489618					0.384451				0.0124464
2.16011				1.34518					0.696686				0.28128				0.47915					3.35842				1.5487					0.0123352				0.165877				1.09063					0.384839				0.0124464
0.89319				2.79261					0.697024				0.281407				0.47948					0.303023				2.9798					1.67684				0.55454				0.17044					0.384993				0.0124464
1.07269				0.852764					0.697775				0.281871				0.479539					0.676215				2.34775					0.488411				2.9516				0.0124452					0.385569				0.0124464
3.23281				0.342311					0.697811				0.281971				0.479562					3.89234				0.388469					1.50306				0.121295				0.853498					0.386534				0.0124464
3.57479				0.011129					0.698079				0.282011				0.479687					0.684725				0.0124323					1.85088				0.293838				2.28004					0.387168				0.0124464
3.76891				2.2929					0.698485				0.282034				0.480246					1.69191				0.962745					1.4796				0.663876				0.322378					0.387511				0.0124464
2.34971				0.0124449					0.698625				0.282077				0.480449					0.466453				0.765916					0.182384				1.14877				0.744705					0.388022				0.0124464
7.33961				0.717753					0.698833				0.282221				0.481186					1.17955				1.48925					1.61824				2.18608				0.0835977					0.388416				0.0124464
3.88207				2.8981					0.698912				0.282444				0.481624					0.19586				3.12901					0.40555				1.13037				0.198782					0.388802				0.0124464
12.4913				2.41294					0.69921				0.282829				0.481856					0.142717				1.36988					4.51543				1.10755				0.7613					0.388873				0.0124464
0.709235				0.845927					0.699283				0.283585				0.482596					1.71648				7.8924					1.19434				1.22473				0.38786					0.389232				0.0124464
1.30367				0.0115099					0.699687				0.283741				0.482716					0.923254				0.762007					1.20578				0.438288				1.48183					0.39051				0.0124464
3.03071				5.3877					0.69976				0.283776				0.482862					3.83259				2.78263					0.633881				0.550915				0.17386					0.390939				0.0124464
1.34863				0.0124454					0.700124				0.284492				0.483571					0.416509				2.40527					0.131698				2.26875				4.96139					0.391339				0.0124464
0.756786				0.511767					0.70055				0.285141				0.483664					1.21938				2.28191					0.984644				0.0812291				0.619594					0.391753				0.0124464
5.63196				0.0119871					0.700662				0.285551				0.483731					2.30494				2.13703					4.00799				1.9785				0.832509					0.391775				0.0124464
3.80978				1.89508					0.701126				0.285656				0.483856					1.0446				0.807528					0.0124449				1.0025				2.14468					0.392432				0.0124464
1.06621				2.19204					0.701875				0.285777				0.484084					0.982932				0.441126					1.96807				1.52193				0.460801					0.3926				0.0124464
5.01435				1.25542					0.702211				0.285834				0.484706					1.1029				0.201829					0.991665				4.01689				1.48599					0.394587				0.0124464
1.89434				0.2952					0.702659				0.285883				0.484838					0.225049				1.20424					0.021453				5.65567				0.846648					0.394613				0.0124464
2.42688				1.15367					0.702992				0.286323				0.48495					1.16273				15.0418					0.44255				1.77889				1.12898					0.394954				0.0124464
7.97678				2.75701					0.704375				0.286707				0.485017					8.54634				0.568776					1.14702				0.0117609				1.74105					0.395015				0.0124464
3.26077				2.16598					0.704536				0.286955				0.485028					0.67518				4.20941					0.614791				0.375256				1.91913					0.395059				0.0124464
6.52614				1.72658					0.704889				0.28708				0.485028					0.667236				0.0124452					0.46431				0.320813				0.895259					0.395669				0.0124464
0.0124449				2.92084					0.704927				0.288311				0.485627					0.226346				11.2209					1.50671				2.82767				0.997193					0.395958				0.0124464
0.0124449				1.34548					0.704943				0.288491				0.485684					1.45091				2.03652					1.72609				0.126489				0.614412					0.396153				0.0124464
5.08372				2.3947					0.705028				0.288945				0.485803					0.598887				1.8032					0.704585				0.895081				0.834876					0.396942				0.0124464
1.99036				0.687856					0.705557				0.289001				0.48597					0.728745				1.10854					0.248121				3.11508				0.857773					0.397017				0.0124464
0.669586				1.42364					0.705725				0.289082				0.486265					0.238682				1.21325					0.447308				0.0113275				0.790135					0.397452				0.0124464
5.37686				2.22514					0.705857				0.28909				0.486301					1.01477				0.938263					0.134061				1.08633				0.907791					0.397921				0.0124464
5.53397				1.10994					0.70615				0.289449				0.486483					1.69564				3.43521					0.25372				0.64498				1.63946					0.398076				0.0124464
3.77193				5.99653					0.706316				0.289648				0.486511					1.28201				0.761586					1.16282				0.54601				0.773154					0.398602				0.0124464
2.84463				1.84589					0.706861				0.290001				0.487188					1.35147				1.5439					0.0118512				5.40751				0.739619					0.398843				0.0124464
3.63662				0.939475					0.7074				0.290155				0.487364					1.53919				0.855421					0.992932				0.505211				0.705096					0.399101				0.0124464
7.17811				0.666416					0.70785				0.290549				0.487852					4.69236				1.96182					0.243043				0.0120164				1.59853					0.399103				0.0124464
4.03455				1.17552					0.708231				0.291376				0.488026					1.43503				1.35402					0.980677				0.0106413				3.39194					0.399199				0.0124464
5.16115				1.64407					0.708592				0.291425				0.488255					1.00418				3.44553					3.36786				0.254692				0.792476					0.399464				0.0124464
0.838874				0.65383					0.708733				0.291464				0.488272					2.91523				0.627244					0.0102212				2.30878				0.592514					0.399751				0.0124464
0.468879				3.07285					0.708805				0.291943				0.488509					1.61444				0.977503					0.990978				1.28933				0.25273					0.39976				0.0124464
2.22768				6.13823					0.709371				0.292723				0.488794					0.0124459				0.241066					3.1955				1.80005				2.19303					0.400339				0.0124464
1.88194				7.21482					0.709447				0.292777				0.488946					0.131273				0.601684					0.752502				0.802565				0.293827					0.400405				0.0124464
3.25474				2.89147					0.709492				0.293304				0.489144					0.533341				5.92948					0.458659				2.43022				1.33999					0.400721				0.0124469
2.12819				6.41156					0.709607				0.293463				0.489262					5.23056				14.9346					0.337326				3.19305				1.08243					0.400803				0.0124469
3.50497				0.940019					0.709813				0.293671				0.490183					2.32362				3.99048					2.03403				1.71586				3.78936					0.400815				0.0124469
2.55044				4.43942					0.70994				0.293739				0.490277					1.0071				0.0124452					8.08444				1.04915				0.884949					0.401277				0.0124469
5.58748				0.597676					0.710192				0.293793				0.490608					1.53515				3.45277					1.66605				0.633735				1.48488					0.401282				0.0124469
11.8201				0.950251					0.710753				0.293826				0.490961					2.69552				4.62209					1.01844				3.13682				0.0948225					0.401738				0.0124469
1.10018				1.46907					0.710778				0.2939				0.491097					0.0114956				0.593506					0.348993				0.0122551				0.00976018					0.401757				0.0124469
1.35114				1.96559					0.710853				0.294031				0.491801					1.81506				2.56367					0.815127				2.04225				0.0101536					0.402025				0.0124469
0.0116658				3.65805					0.711631				0.294536				0.491846					2.34599				7.97461					3.71286				0.0124449				3.14812					0.402518				0.0263828
3.13738				1.18061					0.711766				0.295025				0.491869					2.47473				2.42993					0.123264				0.454948				0.334679					0.403001				0.0339185
0.661661				1.52788					0.711953				0.295261				0.492287					0.308668				1.50469					0.28396				0.0120051				9.81659					0.403203				0.039719
1.44439				0.0124454					0.712015				0.295817				0.492455					0.466916				0.369461					0.308907				0.0124449				0.389053					0.403547				0.0417164
2.61487				0.461776					0.712183				0.295861				0.492538					2.12706				0.012445					0.701784				5.7152				0.0124457					0.40365				0.0418362
4.60677				0.407795					0.712345				0.295957				0.492672					1.04423				0.677915					2.05394				1.59176				2.13599					0.40386				0.0419489
1.26053				1.70686					0.712384				0.29596				0.493525					0.325347				0.511024					1.25988				2.20756				1.90439					0.404346				0.0429505
1.71309				1.09841					0.712572				0.296095				0.493551					1.57278				0.345653					2.65203				0.00982391				1.79867					0.404776				0.0454167
5.89703				0.0110093					0.712609				0.296278				0.493743					0.0124449				1.48655					1.26923				0.0106634				1.12705					0.404961				0.0511232
6.5016				0.12237					0.712711				0.296349				0.493874					1.40922				1.79018					1.23077				0.991876				0.266271					0.405028				0.0512762
4.86452				1.09963					0.71336				0.296816				0.494805					0.445575				2.15143					0.382403				1.34581				0.393269					0.405428				0.0527271
0.0124454				3.33735					0.713922				0.297047				0.49515					0.710445				1.15277					0.501852				0.557236				1.2872					0.405824				0.0529574
7.09135				0.739236					0.714353				0.297248				0.495362					0.0109069				0.219031					2.7987				0.549261				0.878696					0.405964				0.0537868
1.81536				0.96669					0.714511				0.297718				0.495508					0.710322				1.74226					0.145817				1.92398				0.356793					0.406686				0.0556853
4.44984				0.307996					0.715183				0.297723				0.495644					1.48055				0.456688					0.527661				0.575157				4.31331					0.406781				0.0558882
2.82212				0.30695					0.715654				0.297969				0.495652					1.89493				0.824401					0.637466				1.26993				0.0102593					0.406823				0.0559552
9.66433				0.349546					0.71609				0.298402				0.496289					1.91575				4.43997					1.91444				1.25875				0.00929672					0.406882				0.0560744
1.28755				0.966087					0.716362				0.298518				0.496423					1.53597				7.31187					0.0890595				4.72477				0.13703					0.407731				0.0566379
3.07394				0.0117721					0.717101				0.298798				0.496465					1.10658				0.815842					1.41919				5.11422				0.539148					0.407994				0.0585014
1.81192				1.20871					0.717342				0.298959				0.496896					2.73551				0.913461					3.82433				4.00726				2.36874					0.408234				0.0594135
2.1114				0.917357					0.718335				0.299871				0.496988					2.09572				1.3777					0.957305				1.75886				0.522957					0.408965				0.0603485
1.43256				0.911341					0.718617				0.300162				0.497044					4.36938				6.73914					0.238638				2.30703				0.010779					0.409138				0.0607335
1.99675				1.27576					0.718851				0.300198				0.497135					3.64098				1.50284					0.875095				0.281556				0.11087					0.409161				0.0609307
0.682579				0.486902					0.719766				0.300252				0.497798					3.00729				2.76166					0.0111923				1.57856				0.801714					0.410747				0.0616778
4.888				2.00189					0.719987				0.300443				0.49791					2.34796				1.07512					2.2002				2.41731				0.71331					0.410798				0.0617556
0.930051				0.0124464					0.720332				0.300456				0.498572					4.01815				1.03195					1.13037				0.551026				0.385536					0.411143				0.062086
1.87924				1.87116					0.720465				0.300634				0.498572					0.103547				3.92178					0.328438				2.07174				0.288727					0.411645				0.0621632
0.0114963				3.69046					0.721315				0.300938				0.499084					0.863584				7.37042					0.011136				5.20893				0.19073					0.412353				0.0622537
0.0124454				0.925426					0.721681				0.30108				0.499198					1.42954				0.733039					4.52204				3.76379				1.66382					0.413008				0.0622641
1.80152				3.14528					0.722199				0.301349				0.49983					1.90401				2.17648					2.35793				1.48123				0.553951					0.413704				0.0624596
4.37181				0.408702					0.722205				0.301617				0.500443					0.345659				0.542965					5.81095				1.37466				0.524433					0.414176				0.0632969
3.98732				2.7867					0.722263				0.301716				0.500474					0.593585				0.0124452					0.184355				0.871035				0.377467					0.414217				0.0640107
9.30634				6.03888					0.722456				0.301797				0.500487					1.80365				1.09377					0.560218				0.591918				2.58598					0.414762				0.0640839
5.08451				7.94909					0.722493				0.301862				0.500615					0.426624				1.45827					0.0111269				0.252768				0.842784					0.414816				0.064966
2.20811				3.85705					0.722697				0.302207				0.501004					0.888933				3.07534					1.22327				0.687177				0.505707					0.414989				0.0663511
6.23855				2.90789					0.72299				0.302227				0.501078					0.187864				0.0113461					0.208853				0.310019				0.289253					0.415029				0.067039
2.44783				7.07701					0.72319				0.302253				0.501415					0.287115				0.573905					0.177061				0.925543				0.246105					0.41513				0.0672411
1.95159				0.607971					0.72366				0.302362				0.502101					2.81178				0.933338					1.88214				2.61082				2.55928					0.415158				0.067422
3.17461				0.349848					0.723842				0.302409				0.502115					3.46993				0.0124452					0.012421				0.0116693				1.03238					0.415706				0.067526
2.29973				3.16419					0.724029				0.302931				0.502198					0.544493				3.48298					2.4598				2.74259				0.717711					0.415895				0.0675984
0.780653				0.0118724					0.724342				0.303006				0.502582					1.9046				0.42788					0.0124452				3.24252				0.810715					0.416274				0.0678144
0.795915				0.819701					0.724676				0.30302				0.50261					1.73525				0.487063					1.01689				0.445471				1.81786					0.416576				0.0684316
3.4954				0.0120114					0.725181				0.303064				0.502705					3.15655				3.95721					1.33426				1.31289				0.33762					0.416619				0.069611
0.0120376				0.0114235					0.725203				0.30359				0.502735					2.55205				1.00581					2.74552				1.71577				2.926					0.41759				0.0700461
3.14665				8.72629					0.725777				0.303981				0.503086					0.380942				1.22383					1.38209				0.515254				0.285108					0.417953				0.0704466
3.97398				1.52909					0.726498				0.304145				0.503195					5.31144				0.613163					7.96427				0.944494				1.73365					0.418414				0.0712794
3.36552				8.25712					0.726621				0.304263				0.504461					2.93916				1.35297					0.411558				2.48101				0.391718					0.419009				0.071352
0.0124449				2.94481					0.726717				0.304627				0.504532					0.336822				8.7344					0.750385				2.75992				0.0123176					0.419338				0.0720001
4.09318				1.97994					0.726907				0.304841				0.504542					0.866976				0.320083					2.75936				1.31493				0.972281					0.42007				0.0724547
4.92296				0.313557					0.72729				0.305153				0.504878					2.09779				0.72056					0.817486				0.494337				3.88993					0.42043				0.0734229
4.97184				4.44776					0.727322				0.305391				0.505179					1.36764				4.09373					0.21536				1.30171				1.19646					0.421066				0.0747979
4.71119				5.93642					0.727375				0.305574				0.505379					0.258862				0.589344					0.271186				0.371255				7.56232					0.421091				0.075123
4.05738				0.505775					0.728217				0.306091				0.505503					0.602488				0.309775					13.2135				0.0119986				0.494947					0.421368				0.0751308
7.61228				1.14738					0.728293				0.30614				0.505784					0.407602				1.51958					1.12382				0.0124454				1.49525					0.421479				0.0760278
1.39366				1.7819					0.728296				0.306371				0.506299					2.35667				0.682295					0.437654				1.88584				0.706388					0.421483				0.0765534
3.5678				0.0110072					0.728802				0.306574				0.50643					1.1154				3.31339					0.192347				0.694686				0.148103					0.42186				0.0770079
0.76731				10.2133					0.728927				0.306581				0.506603					3.4024				0.905928					0.510834				0.0119353				1.02215					0.422213				0.077098
6.58685				0.610863					0.729414				0.306728				0.507061					1.22931				1.11569					1.84196				2.42316				1.53102					0.424007				0.0776236
7.80874				2.0139					0.729542				0.307179				0.507356					0.334669				0.222259					1.77694				1.88438				1.13232					0.424225				0.0779398
0.0124459				2.45274					0.729657				0.307449				0.507537					0.251624				1.45626					0.00989567				1.2941				0.908203					0.424661				0.0780915
5.07354				0.683738					0.729885				0.307541				0.508241					0.970943				4.02551					0.54384				0.737135				5.61514					0.42475				0.0782311
3.94244				6.20276					0.729888				0.307909				0.508278					0.487183				0.320733					1.63202				3.4021				2.32543					0.425067				0.0784078
4.96302				0.644155					0.730028				0.308066				0.50868					3.7669				1.58164					0.0716049				9.15537				0.104481					0.425179				0.0789329
1.06898				5.24887					0.730069				0.308568				0.508747					0.294558				2.14206					0.176107				4.01264				0.245974					0.425268				0.0789405
4.44656				0.214249					0.730087				0.308771				0.509537					0.932049				1.27721					0.791044				2.63418				0.954365					0.425571				0.0796193
1.20193				0.15309					0.730195				0.30907				0.509721					3.11512				4.04969					0.0107845				0.621971				0.199737					0.425956				0.081389
0.0123033				3.98021					0.73065				0.309379				0.510062					1.47499				0.167226					2.08411				0.230059				0.452739					0.425979				0.0817258
4.01137				0.888117					0.730821				0.309676				0.51071					5.15959				5.90366					1.97483				1.71085				1.62866					0.426167				0.081805
6.89599				0.234752					0.731146				0.309706				0.510855					1.77624				2.41466					1.70303				1.01426				0.300236					0.42744				0.0819125
0.624891				10.2995					0.731179				0.309734				0.511133					1.29923				0.875054					3.25093				2.58749				1.31608					0.427596				0.0825297
1.52472				2.41557					0.731359				0.310074				0.511221					4.37177				0.28628					1.59851				0.417453				0.720103					0.428295				0.0837305
0.0124459				1.98774					0.731458				0.310105				0.511611					0.535572				0.868904					0.284863				0.798449				0.313779					0.42863				0.0843371
8.08406				2.19813					0.731794				0.311187				0.511623					0.4787				1.16454					1.19349				1.60597				0.559751					0.428835				0.0853529
8.58325				3.63373					0.731819				0.31169				0.511711					0.24725				1.01227					1.64967				0.546252				5.92078					0.428924				0.0860805
1.61292				3.23616					0.732456				0.312194				0.512323					1.72505				4.12019					0.156181				0.0124454				0.521034					0.429287				0.086099
0.490782				0.141504					0.732523				0.312502				0.512374					1.25608				1.75212					2.49139				1.63847				0.00898101					0.429333				0.0867025
0.0124449				0.303603					0.732656				0.312938				0.51254					5.19939				2.53873					2.07386				3.23997				4.14336					0.429556				0.0867835
2.72795				0.396818					0.733439				0.313571				0.512835					3.55272				3.63302					0.903976				2.37093				0.321171					0.429934				0.0869846
3.90201				0.236552					0.73357				0.313768				0.512862					1.29437				3.83126					1.42541				1.62133				0.930181					0.430138				0.087831
0.0124464				0.137117					0.734007				0.313818				0.513019					0.872305				1.48517					0.51725				0.0115574				1.69726					0.430248				0.0884236
2.20053				6.72175					0.734908				0.314161				0.513056					3.72035				1.94433					3.01488				2.02247				0.00954832					0.430525				0.0887548
1.65335				0.326226					0.735076				0.314287				0.513982					0.463412				0.430598					1.47285				1.85952				0.150461					0.430564				0.0890529
2.21673				0.871869					0.735181				0.315064				0.514753					1.58521				1.03696					0.656953				0.70239				0.2833					0.430598				0.089479
1.30254				1.81656					0.735375				0.315565				0.514754					0.70706				3.27212					2.36421				0.79049				1.98451					0.430697				0.089891
1.2298				3.3433					0.735413				0.315615				0.514785					0.212982				0.119858					1.3777				0.466028				0.167576					0.430882				0.0899116
4.68611				5.87117					0.73557				0.315842				0.514893					0.218039				1.04086					0.659196				0.871532				0.0104875					0.431528				0.0899895
1.964				3.38369					0.735906				0.315907				0.515589					0.244811				2.01924					1.67544				0.232962				0.561066					0.431585				0.0900298
3.01157				0.595848					0.736319				0.316013				0.515749					1.38813				1.54778					2.18292				5.27362				2.7547					0.431606				0.0905276
2.13979				1.4841					0.736368				0.316539				0.516444					0.0109988				0.0112126					3.41196				0.774234				5.02907					0.431953				0.0905904
3.77664				0.360003					0.73641				0.316723				0.516648					3.07556				0.579257					0.0116999				0.0124454				1.93329					0.432438				0.0907236
1.65016				0.733102					0.736791				0.31734				0.517459					0.763159				0.721935					1.99265				0.0117616				4.51948					0.432513				0.091168
3.17842				0.597384					0.737197				0.317587				0.51763					0.155433				0.885176					0.245613				0.898529				0.0124457					0.433176				0.0912083
[truncated: 15,926 more rows]
[truncated: 86 more columns]
