# Supplementary material for: A regeneration-triggered metabolic adaptation is necessary for cell identity transitions and cell cycle re-entry to support blastema formation and bone regeneration
Source: eLife. 2022 Aug 22;11:e76987. doi: 10.7554/eLife.76987 (PMC9395193; doi:10.7554/eLife.76987)
Supplement: Figure 2—source data 1. [file elife-76987-fig2-data1.xlsx]

## Sheet: Fig2C
													Summary of Fold Changes
	Biological Replicate	Position	Gene Name	Sample name	Cq values	Average Cq values House keeping gene (ef1a)	dCq	Log2	geoMean	Relative Fold Change
	1	A1	ef1α	Uncut (0hpa) 1	18.23	18.2							hk1					hk2					pfkpa
		A2	ef1α	Uncut (0hpa) 1	18.13									Uncut (0hpa)	6hpa	Fold Change			Uncut (0hpa)	6hpa	Fold Change			Uncut (0hpa)	6hpa	Fold Change
		A3	ef1α	Uncut (0hpa) 1	18.24								Biological Rep 1	0.0535559	0.154305	2.88119		Biological Rep 1	0.257716	0.594819	2.30804		Biological Rep 1	0.148705	0.601731	4.04648
		A7	ef1α	6hpa 1	17.69	17.7467							Biological Rep 2	0.0609536	0.126206	2.07053		Biological Rep 2	0.278135	0.441511	1.5874		Biological Rep 2	0.125915	0.583925	4.63746
		A8	ef1α	6hpa 1	17.79								Biological Rep 3	0.0340514	0.148362	4.35699		Biological Rep 3	0.262524	0.427458	1.62826		Biological Rep 3	0.127084	0.841201	6.61924
		A9	ef1α	6hpa 1	17.76								Biological Rep 4	0.0541782	0.155378	2.86791		Biological Rep 4	0.209331	0.384358	1.83613		Biological Rep 4	0.112178	0.510691	4.55252
		C1	hk1	Uncut (0hpa) 1	29.02		10.82	0.0553166	0.0535559	2.88119			Biological Rep 5	0.0370048	0.0791385	2.1386		Biological Rep 5	0.260109	0.318756	1.22547		Biological Rep 5	0.119123	0.381703	3.20428
		C2	hk1	Uncut (0hpa) 1	28.95		10.75	0.0580668
		C3	hk1	Uncut (0hpa) 1	29.23		11.03	0.0478233					aldoaa					gapdhs					pgam1A
		C7	hk1	6hpa 1	26.74		8.99333	0.196217	0.154305					Uncut (0hpa)	6hpa	Fold Change			Uncut (0hpa)	6hpa	Fold Change			Uncut (0hpa)	6hpa	Fold Change
		C8	hk1	6hpa 1	27.45		9.70333	0.119951					Biological Rep 1	0.901577	2.18433	2.42279		Biological Rep 1	1.51977	3.13223	2.06098		Biological Rep 1	0.186924	0.825795	4.41782
		C9	hk1	6hpa 1	27.07		9.32333	0.156098					Biological Rep 2	1.25747	2.24056	1.7818		Biological Rep 2	2.09051	3.85623	1.84463		Biological Rep 2	0.31802	0.72725	2.2868
		D1	pfkpa	Uncut (0hpa) 1	27.81		9.61	0.127968	0.148705	4.04648			Biological Rep 3	0.918397	1.86674	2.03261		Biological Rep 3	1.36654	3.38821	2.47942		Biological Rep 3	0.272411	0.964056	3.53898
		D2	pfkpa	Uncut (0hpa) 1	27.65		9.45	0.142977					Biological Rep 4	1.13592	1.97774	1.7411		Biological Rep 4	1.35396	3.00463	2.21914		Biological Rep 4	0.321715	0.827706	2.57279
		D3	pfkpa	Uncut (0hpa) 1	27.32		9.12	0.179724					Biological Rep 5	0.718897	1.18142	1.64338		Biological Rep 5	1.47822	2.4575	1.66248		Biological Rep 5	0.280069	0.442533	1.58008
		D7	pfkpa	6hpa 1	24.98		7.23333	0.664584	0.601731
		D8	pfkpa	6hpa 1	25.33		7.58333	0.521422					pgam1B					eno1a					pkma
		D9	pfkpa	6hpa 1	25.06		7.31333	0.628735						Uncut (0hpa)	6hpa	Fold Change			Uncut (0hpa)	6hpa	Fold Change			Uncut (0hpa)	6hpa	Fold Change
		E1	pgam1A	Uncut (0hpa) 1	27.01		8.81	0.222805	0.186924	4.41782			Biological Rep 1	0.128264	0.0882163	0.687771		Biological Rep 1	0.0132046	0.0283703	2.14851		Biological Rep 1	0.708999	2.70793	3.81937
		E2	pgam1A	Uncut (0hpa) 1	27.34		9.14	0.17725					Biological Rep 2	0.222291	0.164617	0.740549		Biological Rep 2	0.0163321	0.0291005	1.7818		Biological Rep 2	0.65847	2.37928	3.61334
		E3	pgam1A	Uncut (0hpa) 1	27.44		9.24	0.16538					Biological Rep 3	0.183077	0.138107	0.754364		Biological Rep 3	0.00527672	0.0148217	2.80889		Biological Rep 3	0.508337	2.57968	5.07474
		E7	pgam1A	6hpa 1	24.75		7.00333	0.779447	0.825795				Biological Rep 4	0.214224	0.191293	0.89296		Biological Rep 4	0.0069466	0.0193775	2.78949		Biological Rep 4	0.713931	2.28763	3.20428
		E8	pgam1A	6hpa 1	24.57		6.82333	0.883023					Biological Rep 5	0.276853	0.172403	0.622725		Biological Rep 5	0.0097336	0.0145167	1.4914		Biological Rep 5	0.544822	1.61014	2.95536
		E9	pgam1A	6hpa 1	24.68		6.93333	0.818199
		F1	pkma	Uncut (0hpa) 1	25.53		7.33	0.621513	0.708999	3.81937			ldha					pdha1a					pdha1b
		F2	pkma	Uncut (0hpa) 1	25.25		7.05	0.754638						Uncut (0hpa)	6hpa	Fold Change			Uncut (0hpa)	6hpa	Fold Change			Uncut (0hpa)	6hpa	Fold Change
		F3	pkma	Uncut (0hpa) 1	25.24		7.04	0.759887					Biological Rep 1	0.183925	0.770494	4.18918		Biological Rep 1	0.368701	0.489888	1.32869		Biological Rep 1	0.003999	0.000185948	0.0464987
		F7	pkma	6hpa 1	22.94		5.19333	2.73307	2.70793				Biological Rep 2	0.13433	0.583925	4.34694		Biological Rep 2	0.560139	0.453924	0.810378		Biological Rep 2	0.00094801	0.000203482	0.214641
		F8	pkma	6hpa 1	22.96		5.21333	2.69544					Biological Rep 3	0.141662	0.818199	5.77572		Biological Rep 3	0.298098	0.396078	1.32869		Biological Rep 3	0.00166591	0.000135495	0.0813339
		F9	pkma	6hpa 1	22.96		5.21333	2.69544					Biological Rep 4	0.145308	0.551152	3.79298		Biological Rep 4	0.434428	0.435433	1.00231		Biological Rep 4	0.00242778	0.00037796	0.155681
		G1	ldha	Uncut (0hpa) 1	27.31		9.11	0.180974	0.183925	4.18918			Biological Rep 5	0.128858	0.361948	2.80889		Biological Rep 5	0.296723	0.463462	1.56193		Biological Rep 5	0.000860337	0.000169925	0.19751
		G2	ldha	Uncut (0hpa) 1	27.5		9.3	0.158643
		G3	ldha	Uncut (0hpa) 1	27.05		8.85	0.216713					dlat					cs					aco2
		G7	ldha	6hpa 1	24.77		7.02333	0.768716	0.770494					Uncut (0hpa)	6hpa	Fold Change			Uncut (0hpa)	6hpa	Fold Change			Uncut (0hpa)	6hpa	Fold Change
		G8	ldha	6hpa 1	24.86		7.11333	0.722226					Biological Rep 1	0.653922	0.631647	0.965936		Biological Rep 1	2.00072	2.15426	1.07674		Biological Rep 1	0.903663	1.36654	1.51222
		G9	ldha	6hpa 1	24.67		6.92333	0.82389					Biological Rep 2	0.708999	0.618648	0.872564		Biological Rep 2	1.43448	1.74173	1.21419		Biological Rep 2	0.852944	1.07464	1.25992
		H1	pdha1b	Uncut (0hpa) 1	32.8		14.6	0.00402682	0.003999	0.0464987			Biological Rep 3	0.544822	0.905753	1.66248		Biological Rep 3	1.17055	1.8928	1.61702		Biological Rep 3	0.577219	1.22308	2.11893
		H2	pdha1b	Uncut (0hpa) 1	32.92		14.72	0.00370543					Biological Rep 4	0.620079	1.04044	1.67791		Biological Rep 4	1.28389	1.62134	1.26284		Biological Rep 4	0.696015	1.58431	2.27626
		H3	pdha1b	Uncut (0hpa) 1	32.71		14.51	0.00428603					Biological Rep 5	0.669206	0.899496	1.34412		Biological Rep 5	1.42457	1.57337	1.10445		Biological Rep 5	0.792156	1.14911	1.45062
		H7	pdha1b	6hpa 1	36.71		18.9633	0.000195645	0.000185948
		H8	pdha1b	6hpa 1	36.7		18.9533	0.000197005					sdhdb					mdh2					ndufv2
		H9	pdha1b	6hpa 1	36.94		19.1933	0.000166813						Uncut (0hpa)	6hpa	Fold Change			Uncut (0hpa)	6hpa	Fold Change			Uncut (0hpa)	6hpa	Fold Change
		A4	dlat	Uncut (0hpa) 1	25.57		7.37	0.604518	0.653922	0.965936			Biological Rep 1	0.35532	0.68802	1.93634		Biological Rep 1	4.23939	3.71627	0.876606		Biological Rep 1	0.105637	0.167689	1.5874
		A5	dlat	Uncut (0hpa) 1	25.32		7.12	0.718897					Biological Rep 2	0.496726	0.713931	1.43727		Biological Rep 2	5.07658	3.68208	0.725309		Biological Rep 2	0.172403	0.237696	1.37872
		A6	dlat	Uncut (0hpa) 1	25.48		7.28	0.64343					Biological Rep 3	0.507164	0.691207	1.36289		Biological Rep 3	3.99222	3.28795	0.823591		Biological Rep 3	0.127378	0.173602	1.36289
		A10	dlat	6hpa 1	24.96		7.21333	0.673861	0.631647				Biological Rep 4	0.676982	1.01903	1.50525		Biological Rep 4	5.7379	3.9191	0.68302		Biological Rep 4	0.104424	0.153239	1.46747
		A11	dlat	6hpa 1	25.02		7.27333	0.646411					Biological Rep 5	0.598956	0.788504	1.31646		Biological Rep 5	4.72568	3.92817	0.831238		Biological Rep 5	0.0874048	0.141335	1.61702
		A12	dlat	6hpa 1	25.18		7.43333	0.578554
		B4	coa5	Uncut (0hpa) 1	29.15		10.95	0.05055	0.0493955	1.27162			cox6c					coa3					coa5
		B5	coa5	Uncut (0hpa) 1	29.39		11.19	0.042803						Uncut (0hpa)	6hpa	Fold Change			Uncut (0hpa)	6hpa	Fold Change			Uncut (0hpa)	6hpa	Fold Change
		B6	coa5	Uncut (0hpa) 1	29.01		10.81	0.0557014					Biological Rep 1	0.105393	0.134641	1.27751		Biological Rep 1	0.0221562	0.0377823	1.70527		Biological Rep 1	0.0493955	0.0628122	1.27162
		B10	coa5	6hpa 1	28.27		10.5233	0.0679455	0.0628122				Biological Rep 2	1.36338	3.67359	2.69447		Biological Rep 2	0.0202939	0.0370048	1.82344		Biological Rep 2	0.0493955	0.0896547	1.81504
		B11	coa5	6hpa 1	28.34		10.5933	0.0647275					Biological Rep 3	3.85623	4.16175	1.07923		Biological Rep 3	0.0146177	0.0363271	2.48515		Biological Rep 3	0.0384872	0.102986	2.67586
		B12	coa5	6hpa 1	28.54		10.7933	0.0563486					Biological Rep 4	2.86233	1.4885	0.52003		Biological Rep 4	0.0161073	0.0378697	2.3511		Biological Rep 4	0.0366644	0.102039	2.78305
		C4	cox6c	Uncut (0hpa) 1	28.07		9.87	0.106865	0.105393	1.27751			Biological Rep 5	2.71419	4.80273	1.76949		Biological Rep 5	0.00946744	0.0301268	3.18215		Biological Rep 5	0.0296434	0.0635421	2.14355
		C5	cox6c	Uncut (0hpa) 1	28.19		9.99	0.0983355
		C6	cox6c	Uncut (0hpa) 1	28.01		9.81	0.111403					mpc1					mpc2					pdk3a
		C10	cox6c	6hpa 1	27.2		9.45333	0.142647	0.134641					Uncut (0hpa)	6hpa	Fold Change			Uncut (0hpa)	6hpa	Fold Change			Uncut (0hpa)	6hpa	Fold Change
		C11	cox6c	6hpa 1	27.08		9.33333	0.15502					Biological Rep 1	0.329235	0.26435	0.802923		Biological Rep 1	1.04767	0.862855	0.823591		Biological Rep 1	0.146319	0.0834577	0.570382
		C12	cox6c	6hpa 1	27.57		9.82333	0.110378					Biological Rep 2	0.390625	0.261314	0.668964		Biological Rep 2	1.30482	0.659993	0.50581		Biological Rep 2	0.100402	0.0590135	0.587774
		A1	ef1α	Uncut (0hpa) 1	17.13	17.5367							Biological Rep 3	0.335377	0.375579	1.11987		Biological Rep 3	0.899496	0.897421	0.997692		Biological Rep 3	0.025275	0.0128139	0.50698
		A2	ef1α	Uncut (0hpa) 1	17.75								Biological Rep 4	0.361113	0.307187	0.850667		Biological Rep 4	1.09976	0.905753	0.823591		Biological Rep 4	0.0193775	0.0150634	0.777366
		A3	ef1α	Uncut (0hpa) 1	17.73								Biological Rep 5	0.322459	0.243815	0.756109		Biological Rep 5	0.984313	0.722226	0.733736		Biological Rep 5	0.0433004	0.0144164	0.33294
		A7	ef1α	6hpa 1	17.66	17.48
		A8	ef1α	6hpa 1	17.22								pdk3b					gls					glud1a
		A9	ef1α	6hpa 1	17.56									Uncut (0hpa)	6hpa	Fold Change			Uncut (0hpa)	6hpa	Fold Change			Uncut (0hpa)	6hpa	Fold Change
		B1	hk2	Uncut (0hpa) 1	26.19		8.65333	0.248363	0.257716	2.30804			Biological Rep 1	0.0338161	0.0173033	0.511687		Biological Rep 1	0.10017	0.0420191	0.419478		Biological Rep 1	5.14744	3.16862	0.615572
		B2	hk2	Uncut (0hpa) 1	26.19		8.65333	0.248363					Biological Rep 2	0.0282395	0.0126083	0.44648		Biological Rep 2	0.068894	0.0457693	0.664343		Biological Rep 2	4.93776	3.03253	0.614152
		B3	hk2	Uncut (0hpa) 1	26.03		8.49333	0.277493					Biological Rep 3	0.0177897	0.00542507	0.304955		Biological Rep 3	0.0368342	0.0478233	1.29834		Biological Rep 3	1.18415	0.864851	0.730353
		B7	hk2	6hpa 1	25.04		7.56	0.529924	0.594819				Biological Rep 4	0.0225696	0.00929405	0.411796		Biological Rep 4	0.041345	0.0303363	0.733736		Biological Rep 4	1.59902	1.4545	0.909618
		B8	hk2	6hpa 1	24.74		7.26	0.652412					Biological Rep 5	0.0311892	0.00799801	0.256435		Biological Rep 5	0.0554446	0.0426057	0.768438		Biological Rep 5	2.44617	1.17055	0.478525
		B9	hk2	6hpa 1	24.84		7.36	0.608722
		C1	aldoaa	Uncut (0hpa) 1	24.07		6.53333	1.07962	0.901577	2.42279			glud1b
		C2	aldoaa	Uncut (0hpa) 1	24.49		6.95333	0.806934						Uncut (0hpa)	6hpa	Fold Change
		C3	aldoaa	Uncut (0hpa) 1	24.43		6.89333	0.841201					Biological Rep 1	0.854917	0.58663	0.686184
		C7	aldoaa	6hpa 1	23.17		5.69	1.93704	2.18433				Biological Rep 2	0.768716	0.450789	0.586417
		C8	aldoaa	6hpa 1	23.06		5.58	2.09051					Biological Rep 3	0.585276	0.36785	0.628507
		C9	aldoaa	6hpa 1	22.76		5.28	2.57372					Biological Rep 4	0.611542	0.3545	0.579682
		D1	gapdhs	Uncut (0hpa) 1	23.7		6.16333	1.39525	1.51977	2.06098			Biological Rep 5	0.697625	0.333831	0.478525
		D2	gapdhs	Uncut (0hpa) 1	23.51		5.97333	1.59165
		D3	gapdhs	Uncut (0hpa) 1	23.52		5.98333	1.58066
		D7	gapdhs	6hpa 1	22.57		5.09	2.93601	3.13223
		D8	gapdhs	6hpa 1	22.31		4.83	3.51581
		D9	gapdhs	6hpa 1	22.55		5.07	2.97699
		E1	pgam1B	Uncut (0hpa) 1	26.9		9.36333	0.151829	0.128264	0.687771
		E2	pgam1B	Uncut (0hpa) 1	27.32		9.78333	0.113481
		E3	pgam1B	Uncut (0hpa) 1	27.21		9.67333	0.122472
		E7	pgam1B	6hpa 1	27.63		10.15	0.0880127	0.0882163
		E8	pgam1B	6hpa 1	27.98		10.5	0.0690534
		E9	pgam1B	6hpa 1	27.27		9.79	0.112958
		F1	eno1a	Uncut (0hpa) 1	30.58		13.0433	0.0118458	0.0132046	2.14851
		F2	eno1a	Uncut (0hpa) 1	30.17		12.6333	0.0157394
		F3	eno1a	Uncut (0hpa) 1	30.52		12.9833	0.0123489
		F7	eno1a	6hpa 1	29.27		11.79	0.0282395	0.0283703
		F8	eno1a	6hpa 1	29.63		12.15	0.0220032
		F9	eno1a	6hpa 1	28.89		11.41	0.0367492
		A4	pdha1a	Uncut (0hpa) 1	25.55		8.01333	0.387031	0.368701	1.32869
		A5	pdha1a	Uncut (0hpa) 1	25.58		8.04333	0.379066
		A6	pdha1a	Uncut (0hpa) 1	25.73		8.19333	0.341634
		A10	pdha1a	6hpa 1	25.13		7.65	0.497875	0.489888
		A11	pdha1a	6hpa 1	25.14		7.66	0.494436
		A12	pdha1a	6hpa 1	25.19		7.71	0.477594
		B4	sdhdb	Uncut (0hpa) 1	25.54		8.00333	0.389724	0.35532	1.93634
		B5	sdhdb	Uncut (0hpa) 1	25.69		8.15333	0.351238
		B6	sdhdb	Uncut (0hpa) 1	25.79		8.25333	0.327717
		B10	sdhdb	6hpa 1	24.58		7.1	0.728932	0.68802
		B11	sdhdb	6hpa 1	24.75		7.27	0.647906
		B12	sdhdb	6hpa 1	24.66		7.18	0.689612
		C4	mdh2	Uncut (0hpa) 1	21.94		4.40333	4.72568	4.23939	0.876606
		C5	mdh2	Uncut (0hpa) 1	22.17		4.63333	4.02928
		C6	mdh2	Uncut (0hpa) 1	22.18		4.64333	4.00145
		C10	mdh2	6hpa 1	22.28		4.8	3.58968	3.71627
		C11	mdh2	6hpa 1	22.3		4.82	3.54026
		C12	mdh2	6hpa 1	22.11		4.63	4.0386
		D4	ndufv2	Uncut (0hpa) 1	27.42		9.88333	0.105882	0.105637	1.5874
		D5	ndufv2	Uncut (0hpa) 1	27.37		9.83333	0.109615
		D6	ndufv2	Uncut (0hpa) 1	27.48		9.94333	0.101568
		D10	ndufv2	6hpa 1	26.65		9.17	0.173602	0.167689
		D11	ndufv2	6hpa 1	26.71		9.23	0.16653
		D12	ndufv2	6hpa 1	26.74		9.26	0.163103
		E4	coa3	Uncut (0hpa) 1	29.48		11.9433	0.0253921	0.0221562	1.70527
		E5	coa3	Uncut (0hpa) 1	29.7		12.1633	0.0218008
		E6	coa3	Uncut (0hpa) 1	29.85		12.3133	0.019648
		E10	coa3	6hpa 1	29.05		11.57	0.0328914	0.0377823
		E11	coa3	6hpa 1	28.87		11.39	0.0372622
		E12	coa3	6hpa 1	28.63		11.15	0.0440064
		A1	ef1α	Uncut (0hpa) 1	15.28	15.3967
		A2	ef1α	Uncut (0hpa) 1	15.28
		A3	ef1α	Uncut (0hpa) 1	15.63
		A4	ef1α	6hpa 1	15.22	15.2267
		A5	ef1α	6hpa 1	15.18
		A6	ef1α	6hpa 1	15.28
		B1	aco2	Uncut (0hpa) 1	22.14		6.74333	0.933371	0.903663	1.51222
		B2	aco2	Uncut (0hpa) 1	22.14		6.74333	0.933371
		B3	aco2	Uncut (0hpa) 1	22.28		6.88333	0.847052
		B4	aco2	6hpa 1	21.23		6.00333	1.55889	1.36654
		B5	aco2	6hpa 1	21.5		6.27333	1.29282
		B6	aco2	6hpa 1	21.53		6.30333	1.26622
		E1	cs	Uncut (0hpa) 1	21		5.60333	2.05697	2.00072	1.07674
		E2	cs	Uncut (0hpa) 1	21.04		5.64333	2.00072
		E3	cs	Uncut (0hpa) 1	21.08		5.68333	1.94602
		E4	cs	6hpa 1	20.77		5.54333	2.14432	2.15426
		E5	cs	6hpa 1	20.74		5.51333	2.18938
		E6	cs	6hpa 1	20.78		5.55333	2.12951
	2	A1	ef1α	Uncut (0hpa) 2	17.51	17.2467
		A2	ef1α	Uncut (0hpa) 2	17.06
		A3	ef1α	Uncut (0hpa) 2	17.17
		A7	ef1α	6hpa 2	16.25	16.2333
		A8	ef1α	6hpa 2	16.21
		A9	ef1α	6hpa 2	16.24
		C1	hk1	Uncut (0hpa) 2	28.28		11.0333	0.0477129	0.0609536	2.07053
		C2	hk1	Uncut (0hpa) 2	27.59		10.3433	0.0769744
		C3	hk1	Uncut (0hpa) 2	27.91		10.6633	0.0616619
		C7	hk1	6hpa 2	26.04		9.80667	0.11166	0.126206
		C8	hk1	6hpa 2	25.73		9.49667	0.138426
		C9	hk1	6hpa 2	25.82		9.58667	0.130055
		D1	pfkpa	Uncut (0hpa) 2	27.01		9.76333	0.115065	0.125915	4.63746
		D2	pfkpa	Uncut (0hpa) 2	26.81		9.56333	0.132175
		D3	pfkpa	Uncut (0hpa) 2	26.82		9.57333	0.131262
		D7	pfkpa	6hpa 2	23.71		7.47667	0.561434	0.583925
		D8	pfkpa	6hpa 2	23.62		7.38667	0.597574
		D9	pfkpa	6hpa 2	23.63		7.39667	0.593446
		E1	pgam1A	Uncut (0hpa) 2	25.52		8.27333	0.323205	0.31802	2.2868
		E2	pgam1A	Uncut (0hpa) 2	25.59		8.34333	0.307898
		E3	pgam1A	Uncut (0hpa) 2	25.52		8.27333	0.323205
		E7	pgam1A	6hpa 2	23.41		7.17667	0.691207	0.72725
		E8	pgam1A	6hpa 2	23.27		7.03667	0.761644
		E9	pgam1A	6hpa 2	23.33		7.09667	0.730618
		F1	pkma	Uncut (0hpa) 2	24.59		7.34333	0.615795	0.65847	3.61334
		F2	pkma	Uncut (0hpa) 2	24.37		7.12333	0.717238
		F3	pkma	Uncut (0hpa) 2	24.52		7.27333	0.646411
		F7	pkma	6hpa 2	21.82		5.58667	2.08087	2.37928
		F8	pkma	6hpa 2	21.59		5.35667	2.44052
		F9	pkma	6hpa 2	21.47		5.23667	2.6522
		G1	ldha	Uncut (0hpa) 2	26.83		9.58333	0.130355	0.13433	4.34694
		G2	ldha	Uncut (0hpa) 2	26.88		9.63333	0.125915
		G3	ldha	Uncut (0hpa) 2	26.65		9.40333	0.147678
		G7	ldha	6hpa 2	23.79		7.55667	0.531149	0.583925
		G8	ldha	6hpa 2	23.61		7.37667	0.601731
		G9	ldha	6hpa 2	23.56		7.32667	0.622951
		H1	pdha1b	Uncut (0hpa) 2	33.78		16.5333	0.00105432	0.00094801	0.214641
		H2	pdha1b	Uncut (0hpa) 2	33.72		16.4733	0.00109909
		H3	pdha1b	Uncut (0hpa) 2	34.3		17.0533	0.00073525
		H7	pdha1b	6hpa 2	35.32		19.0867	0.000179614	0.000203482
		H8	pdha1b	6hpa 2	34.94		18.7067	0.00023374
		H9	pdha1b	6hpa 2	35.16		18.9267	0.000200681
		A4	dlat	Uncut (0hpa) 2	24.46		7.21333	0.673861	0.708999	0.872564
		A5	dlat	Uncut (0hpa) 2	24.41		7.16333	0.697625
		A6	dlat	Uncut (0hpa) 2	24.29		7.04333	0.758133
		A10	dlat	6hpa 2	23.48		7.24667	0.65847	0.618648
		A11	dlat	6hpa 2	23.5		7.26667	0.649405
		A12	dlat	6hpa 2	23.73		7.49667	0.553705
		B4	coa5	Uncut (0hpa) 2	28.1		10.8533	0.0540532	0.0493955	1.81504
		B5	coa5	Uncut (0hpa) 2	28.38		11.1333	0.0445177
		B6	coa5	Uncut (0hpa) 2	28.21		10.9633	0.050085
		B10	coa5	6hpa 2	26.34		10.1067	0.0906964	0.0896547
		B11	coa5	6hpa 2	26.27		10.0367	0.0952056
		B12	coa5	6hpa 2	26.46		10.2267	0.0834577
		C4	cox6c	Uncut (0hpa) 2	23.17		5.92333	1.64778	1.36338	2.69447
		C5	cox6c	Uncut (0hpa) 2	23.52		6.27333	1.29282
		C6	cox6c	Uncut (0hpa) 2	23.64		6.39333	1.18964
		C10	cox6c	6hpa 2	20.94		4.70667	3.82959	3.67359
		C11	cox6c	6hpa 2	20.95		4.71667	3.80314
		C12	cox6c	6hpa 2	21.11		4.87667	3.4039
		A1	ef1α	Uncut (0hpa) 2	16.43	16.83
		A2	ef1α	Uncut (0hpa) 2	17.05
		A3	ef1α	Uncut (0hpa) 2	17.01
		A7	ef1α	6hpa 2	16.01	15.9867
		A8	ef1α	6hpa 2	15.9
		A9	ef1α	6hpa 2	16.05
		B1	hk2	Uncut (0hpa) 2	25.19		8.36	0.304361	0.278135	1.5874
		B2	hk2	Uncut (0hpa) 2	25.5		8.67	0.24551
		B3	hk2	Uncut (0hpa) 2	25.27		8.44	0.287943
		B7	hk2	6hpa 2	23.85		7.86333	0.429438	0.441511
		B8	hk2	6hpa 2	23.73		7.74333	0.466686
		B9	hk2	6hpa 2	23.85		7.86333	0.429438
		C1	aldoaa	Uncut (0hpa) 2	23.15		6.32	1.25167	1.25747	1.7818
		C2	aldoaa	Uncut (0hpa) 2	23.11		6.28	1.28686
		C3	aldoaa	Uncut (0hpa) 2	23.17		6.34	1.23444
		C7	aldoaa	6hpa 2	21.57		5.58333	2.08569	2.24056
		C8	aldoaa	6hpa 2	21.49		5.50333	2.20461
		C9	aldoaa	6hpa 2	21.34		5.35333	2.44617
		D1	gapdhs	Uncut (0hpa) 2	22.5		5.67	1.96408	2.09051	1.84463
		D2	gapdhs	Uncut (0hpa) 2	22.37		5.54	2.14928
		D3	gapdhs	Uncut (0hpa) 2	22.36		5.53	2.16423
		D7	gapdhs	6hpa 2	20.63		4.64333	4.00145	3.85623
		D8	gapdhs	6hpa 2	20.62		4.63333	4.02928
		D9	gapdhs	6hpa 2	20.8		4.81333	3.55666
		E1	pgam1B	Uncut (0hpa) 2	25.66		8.83	0.219738	0.222291	0.740549
		E2	pgam1B	Uncut (0hpa) 2	25.53		8.7	0.240458
		E3	pgam1B	Uncut (0hpa) 2	25.74		8.91	0.207885
		E7	pgam1B	6hpa 2	25.13		9.14333	0.176841	0.164617
		E8	pgam1B	6hpa 2	25.29		9.30333	0.158277
		E9	pgam1B	6hpa 2	25.28		9.29333	0.159378
		F1	eno1a	Uncut (0hpa) 2	29.49		12.66	0.0154511	0.0163321	1.7818
		F2	eno1a	Uncut (0hpa) 2	29.49		12.66	0.0154511
		F3	eno1a	Uncut (0hpa) 2	29.25		12.42	0.0182477
		F7	eno1a	6hpa 2	27.83		11.8433	0.0272146	0.0291005
		F8	eno1a	6hpa 2	27.77		11.7833	0.0283703
		F9	eno1a	6hpa 2	27.6		11.6133	0.0319182
		A4	pdha1a	Uncut (0hpa) 2	24.3		7.47	0.564035	0.560139	0.810378
		A5	pdha1a	Uncut (0hpa) 2	24.36		7.53	0.541058
		A6	pdha1a	Uncut (0hpa) 2	24.27		7.44	0.575886
		A10	pdha1a	6hpa 2	23.71		7.72333	0.4732	0.453924
		A11	pdha1a	6hpa 2	23.76		7.77333	0.457081
		A12	pdha1a	6hpa 2	23.84		7.85333	0.432425
		B4	sdhdb	Uncut (0hpa) 2	24.52		7.69	0.484261	0.496726	1.43727
		B5	sdhdb	Uncut (0hpa) 2	24.36		7.53	0.541058
		B6	sdhdb	Uncut (0hpa) 2	24.57		7.74	0.467765
		B10	sdhdb	6hpa 2	23.18		7.19333	0.683268	0.713931
		B11	sdhdb	6hpa 2	23.09		7.10333	0.72725
		B12	sdhdb	6hpa 2	23.08		7.09333	0.732308
		C4	mdh2	Uncut (0hpa) 2	21.03		4.2	5.44094	5.07658	0.725309
		C5	mdh2	Uncut (0hpa) 2	21.01		4.18	5.51689
		C6	mdh2	Uncut (0hpa) 2	21.35		4.52	4.35857
		C10	mdh2	6hpa 2	20.86		4.87333	3.41178	3.68208
		C11	mdh2	6hpa 2	20.71		4.72333	3.7856
		C12	mdh2	6hpa 2	20.68		4.69333	3.86515
		D4	ndufv2	Uncut (0hpa) 2	25.97		9.14	0.17725	0.172403	1.37872
		D5	ndufv2	Uncut (0hpa) 2	25.99		9.16	0.17481
		D6	ndufv2	Uncut (0hpa) 2	26.07		9.24	0.16538
		D10	ndufv2	6hpa 2	24.59		8.60333	0.257122	0.237696
		D11	ndufv2	6hpa 2	24.77		8.78333	0.226962
		D12	ndufv2	6hpa 2	24.75		8.76333	0.23013
		E4	coa3	Uncut (0hpa) 2	28.92		12.09	0.0229376	0.0202939	1.82344
		E5	coa3	Uncut (0hpa) 2	29.06		12.23	0.0208163
		E6	coa3	Uncut (0hpa) 2	29.31		12.48	0.0175043
		E10	coa3	6hpa 2	27.5		11.5133	0.0342091	0.0370048
		E11	coa3	6hpa 2	27.21		11.2233	0.0418254
		E12	coa3	6hpa 2	27.45		11.4633	0.0354155
		A1	ef1α	Uncut (0hpa) 2	14.5	14.4733
		A2	ef1α	Uncut (0hpa) 2	14.43
		A3	ef1α	Uncut (0hpa) 2	14.49
		A4	ef1α	6hpa 2	13.85	13.6767
		A5	ef1α	6hpa 2	13.36
		A6	ef1α	6hpa 2	13.82
		B1	aco2	Uncut (0hpa) 2	21.39		6.91667	0.827706	0.852944	1.25992
		B2	aco2	Uncut (0hpa) 2	21.34		6.86667	0.856895
		B3	aco2	Uncut (0hpa) 2	21.31		6.83667	0.8749
		B4	aco2	6hpa 2	20.23		6.55333	1.06476	1.07464
		B5	aco2	6hpa 2	20.17		6.49333	1.10997
		B6	aco2	6hpa 2	20.25		6.57333	1.0501
		E1	cs	Uncut (0hpa) 2	20.63		6.15667	1.40171	1.43448	1.21419
		E2	cs	Uncut (0hpa) 2	20.63		6.15667	1.40171
		E3	cs	Uncut (0hpa) 2	20.53		6.05667	1.50232
		E4	cs	6hpa 2	19.47		5.79333	1.80315	1.74173
		E5	cs	6hpa 2	19.56		5.88333	1.6941
		E6	cs	6hpa 2	19.53		5.85333	1.7297
	3	A1	ef1α	Uncut (0hpa) 3	17.01	17.4167
		A2	ef1α	Uncut (0hpa) 3	17.6
		A3	ef1α	Uncut (0hpa) 3	17.64
		A7	ef1α	6hpa 3	16.89	16.7967
		A8	ef1α	6hpa 3	16.76
		A9	ef1α	6hpa 3	16.74
		C1	hk1	Uncut (0hpa) 3	29.25		11.8333	0.0274039	0.0340514	4.35699
		C2	hk1	Uncut (0hpa) 3	28.61		11.1933	0.0427042
		C3	hk1	Uncut (0hpa) 3	28.95		11.5333	0.0337381
		C7	hk1	6hpa 3	26.11		9.31333	0.157184	0.148362
		C8	hk1	6hpa 3	26.08		9.28333	0.160486
		C9	hk1	6hpa 3	26.39		9.59333	0.129455
		D1	pfkpa	Uncut (0hpa) 3	27.14		9.72333	0.1183	0.127084	6.61924
		D2	pfkpa	Uncut (0hpa) 3	27		9.58333	0.130355
		D3	pfkpa	Uncut (0hpa) 3	26.97		9.55333	0.133094
		D7	pfkpa	6hpa 3	23.82		7.02333	0.768716	0.841201
		D8	pfkpa	6hpa 3	23.61		6.81333	0.889165
		D9	pfkpa	6hpa 3	23.64		6.84333	0.870866
		E1	pgam1A	Uncut (0hpa) 3	25.7		8.28333	0.320973	0.272411	3.53898
		E2	pgam1A	Uncut (0hpa) 3	26.02		8.60333	0.257122
		E3	pgam1A	Uncut (0hpa) 3	26.09		8.67333	0.244944
		E7	pgam1A	6hpa 3	23.49		6.69333	0.966286	0.964056
		E8	pgam1A	6hpa 3	23.55		6.75333	0.926924
		E9	pgam1A	6hpa 3	23.44		6.64333	1.00036
		F1	pkma	Uncut (0hpa) 3	24.99		7.57333	0.525049	0.508337	5.07474
		F2	pkma	Uncut (0hpa) 3	25.14		7.72333	0.4732
		F3	pkma	Uncut (0hpa) 3	24.98		7.56333	0.528701
		F7	pkma	6hpa 3	22.32		5.52333	2.17426	2.57968
		F8	pkma	6hpa 3	21.99		5.19333	2.73307
		F9	pkma	6hpa 3	21.91		5.11333	2.88891
		G1	ldha	Uncut (0hpa) 3	26.8		9.38333	0.149739	0.141662	5.77572
		G2	ldha	Uncut (0hpa) 3	26.92		9.50333	0.137788
		G3	ldha	Uncut (0hpa) 3	26.92		9.50333	0.137788
		G7	ldha	6hpa 3	23.87		7.07333	0.742531	0.818199
		G8	ldha	6hpa 3	23.63		6.83333	0.876923
		G9	ldha	6hpa 3	23.69		6.89333	0.841201
		H1	pdha1b	Uncut (0hpa) 3	32.75		15.3333	0.00242218	0.00166591	0.0813339
		H2	pdha1b	Uncut (0hpa) 3	33.7		16.2833	0.0012538
		H3	pdha1b	Uncut (0hpa) 3	33.42		16.0033	0.00152236
		H7	pdha1b	6hpa 3	36.98		20.1833	8.39868e-05	0.000135495
		H8	pdha1b	6hpa 3	35.83		19.0333	0.000186378
		H9	pdha1b	6hpa 3	36.06		19.2633	0.000158913
		A4	dlat	Uncut (0hpa) 3	25.06		7.64333	0.500181	0.544822	1.66248
		A5	dlat	Uncut (0hpa) 3	24.98		7.56333	0.528701
		A6	dlat	Uncut (0hpa) 3	24.77		7.35333	0.611542
		A10	dlat	6hpa 3	23.38		6.58333	1.04284	0.905753
		A11	dlat	6hpa 3	23.57		6.77333	0.914163
		A12	dlat	6hpa 3	23.8		7.00333	0.779447
		B4	coa5	Uncut (0hpa) 3	28.56		11.1433	0.0442102	0.0384872	2.67586
		B5	coa5	Uncut (0hpa) 3	28.81		11.3933	0.0371762
		B6	coa5	Uncut (0hpa) 3	28.91		11.4933	0.0346866
		B10	coa5	6hpa 3	26.72		9.92333	0.102986	0.102986
		B11	coa5	6hpa 3	26.69		9.89333	0.10515
		B12	coa5	6hpa 3	26.75		9.95333	0.100867
		C4	cox6c	Uncut (0hpa) 3	22.12		4.70333	3.83845	3.85623	1.07923
		C5	cox6c	Uncut (0hpa) 3	22		4.58333	4.17137
		C6	cox6c	Uncut (0hpa) 3	22.22		4.80333	3.5814
		C10	cox6c	6hpa 3	21.46		4.66333	3.94636	4.16175
		C11	cox6c	6hpa 3	21.47		4.67333	3.9191
		C12	cox6c	6hpa 3	21.22		4.42333	4.66062
		A1	ef1α	Uncut (0hpa) 3	16.81	17.02
		A2	ef1α	Uncut (0hpa) 3	17.25
		A3	ef1α	Uncut (0hpa) 3	17
		A7	ef1α	6hpa 3	16.23	16.2967
		A8	ef1α	6hpa 3	16.21
		A9	ef1α	6hpa 3	16.45
		B1	hk2	Uncut (0hpa) 3	25.6		8.58	0.261314	0.262524	1.62826
		B2	hk2	Uncut (0hpa) 3	25.68		8.66	0.247218
		B3	hk2	Uncut (0hpa) 3	25.5		8.48	0.280069
		B7	hk2	6hpa 3	24.15		7.85333	0.432425	0.427458
		B8	hk2	6hpa 3	24.08		7.78333	0.453924
		B9	hk2	6hpa 3	24.27		7.97333	0.397912
		C1	aldoaa	Uncut (0hpa) 3	23.89		6.87	0.854917	0.918397	2.03261
		C2	aldoaa	Uncut (0hpa) 3	23.73		6.71	0.955188
		C3	aldoaa	Uncut (0hpa) 3	23.74		6.72	0.94859
		C7	aldoaa	6hpa 3	22.02		5.72333	1.8928	1.86674
		C8	aldoaa	6hpa 3	22.14		5.84333	1.74173
		C9	aldoaa	6hpa 3	21.96		5.66333	1.97318
		D1	gapdhs	Uncut (0hpa) 3	23.15		6.13	1.42786	1.36654	2.47942
		D2	gapdhs	Uncut (0hpa) 3	23.26		6.24	1.32304
		D3	gapdhs	Uncut (0hpa) 3	23.23		6.21	1.35084
		D7	gapdhs	6hpa 3	21.24		4.94333	3.25019	3.38821
		D8	gapdhs	6hpa 3	21.08		4.78333	3.63139
		D9	gapdhs	6hpa 3	21.22		4.92333	3.29556
		E1	pgam1B	Uncut (0hpa) 3	26.14		9.12	0.179724	0.183077	0.754364
		E2	pgam1B	Uncut (0hpa) 3	26.12		9.1	0.182233
		E3	pgam1B	Uncut (0hpa) 3	26.08		9.06	0.187356
		E7	pgam1B	6hpa 3	25.79		9.49333	0.138746	0.138107
		E8	pgam1B	6hpa 3	25.72		9.42333	0.145644
		E9	pgam1B	6hpa 3	25.88		9.58333	0.130355
		F1	eno1a	Uncut (0hpa) 3	31.35		14.33	0.00485557	0.00527672	2.80889
		F2	eno1a	Uncut (0hpa) 3	31.09		14.07	0.00581444
		F3	eno1a	Uncut (0hpa) 3	31.25		14.23	0.00520407
		F7	eno1a	6hpa 3	29.31		13.0133	0.0120947	0.0148217
		F8	eno1a	6hpa 3	28.92		12.6233	0.0158489
		F9	eno1a	6hpa 3	28.82		12.5233	0.0169864
		A4	pdha1a	Uncut (0hpa) 3	25.52		8.5	0.276214	0.298098	1.32869
		A5	pdha1a	Uncut (0hpa) 3	25.28		8.26	0.326206
		A6	pdha1a	Uncut (0hpa) 3	25.43		8.41	0.293994
		A10	pdha1a	6hpa 3	24.2		7.90333	0.417695	0.396078
		A11	pdha1a	6hpa 3	24.03		7.73333	0.469932
		A12	pdha1a	6hpa 3	24.6		8.30333	0.316554
		B4	sdhdb	Uncut (0hpa) 3	24.74		7.72	0.474295	0.507164	1.36289
		B5	sdhdb	Uncut (0hpa) 3	24.72		7.7	0.480916
		B6	sdhdb	Uncut (0hpa) 3	24.47		7.45	0.571908
		B10	sdhdb	6hpa 3	23.48		7.18333	0.68802	0.691207
		B11	sdhdb	6hpa 3	23.5		7.20333	0.678548
		B12	sdhdb	6hpa 3	23.44		7.14333	0.707363
		C4	mdh2	Uncut (0hpa) 3	21.78		4.76	3.6906	3.99222	0.823591
		C5	mdh2	Uncut (0hpa) 3	21.66		4.64	4.01071
		C6	mdh2	Uncut (0hpa) 3	21.56		4.54	4.29857
		C10	mdh2	6hpa 3	21.12		4.82333	3.53209	3.28795
		C11	mdh2	6hpa 3	21.05		4.75333	3.7077
		C12	mdh2	6hpa 3	21.5		5.20333	2.71419
		D4	ndufv2	Uncut (0hpa) 3	26.55		9.53	0.135265	0.127378	1.36289
		D5	ndufv2	Uncut (0hpa) 3	26.52		9.5	0.138107
		D6	ndufv2	Uncut (0hpa) 3	26.84		9.82	0.110633
		D10	ndufv2	6hpa 3	25.17		8.87333	0.213236	0.173602
		D11	ndufv2	6hpa 3	25.24		8.94333	0.203137
		D12	ndufv2	6hpa 3	25.99		9.69333	0.120786
		E4	coa3	Uncut (0hpa) 3	29.89		12.87	0.0133581	0.0146177	2.48515
		E5	coa3	Uncut (0hpa) 3	29.5		12.48	0.0175043
		E6	coa3	Uncut (0hpa) 3	29.89		12.87	0.0133581
		E10	coa3	6hpa 3	27.79		11.4933	0.0346866	0.0363271
		E11	coa3	6hpa 3	27.43		11.1333	0.0445177
		E12	coa3	6hpa 3	27.95		11.6533	0.0310454
		A1	ef1α	Uncut (0hpa) 3	17.91	17.68
		A2	ef1α	Uncut (0hpa) 3	17.37
		A3	ef1α	Uncut (0hpa) 3	17.76
		A4	ef1α	6hpa 3	17.36	17.3233
		A5	ef1α	6hpa 3	17.38
		A6	ef1α	6hpa 3	17.23
		B1	aco2	Uncut (0hpa) 3	25.02		7.34	0.61722	0.577219	2.11893
		B2	aco2	Uncut (0hpa) 3	24.99		7.31	0.630189
		B3	aco2	Uncut (0hpa) 3	25.34		7.66	0.494436
		B4	aco2	6hpa 3	23.62		6.29667	1.27208	1.22308
		B5	aco2	6hpa 3	23.74		6.41667	1.17055
		B6	aco2	6hpa 3	23.67		6.34667	1.22875
		E1	cs	Uncut (0hpa) 3	23.94		6.26	1.30482	1.17055	1.61702
		E2	cs	Uncut (0hpa) 3	24.24		6.56	1.05985
		E3	cs	Uncut (0hpa) 3	24.11		6.43	1.15978
		E4	cs	6hpa 3	23.13		5.80667	1.78657	1.8928
		E5	cs	6hpa 3	22.94		5.61667	2.03805
		E6	cs	6hpa 3	23.07		5.74667	1.86243
	4	A1	ef1α	Uncut (0hpa) 4	17.44	17.1867
		A2	ef1α	Uncut (0hpa) 4	16.78
		A3	ef1α	Uncut (0hpa) 4	17.34
		A7	ef1α	6hpa 4	16.12	16.1333
		A8	ef1α	6hpa 4	16.21
		A9	ef1α	6hpa 4	16.07
		C1	hk1	Uncut (0hpa) 4	28.17		10.9833	0.0493955	0.0541782	2.86791
		C2	hk1	Uncut (0hpa) 4	28.07		10.8833	0.0529408
		C3	hk1	Uncut (0hpa) 4	27.87		10.6833	0.060813
		C7	hk1	6hpa 4	25.26		9.12667	0.178896	0.155378
		C8	hk1	6hpa 4	25.63		9.49667	0.138426
		C9	hk1	6hpa 4	25.5		9.36667	0.151479
		D1	pfkpa	Uncut (0hpa) 4	27.17		9.98333	0.098791	0.112178	4.55252
		D2	pfkpa	Uncut (0hpa) 4	26.93		9.74333	0.116671
		D3	pfkpa	Uncut (0hpa) 4	26.86		9.67333	0.122472
		D7	pfkpa	6hpa 4	23.83		7.69667	0.482028	0.510691
		D8	pfkpa	6hpa 4	23.68		7.54667	0.534844
		D9	pfkpa	6hpa 4	23.73		7.59667	0.516625
		E1	pgam1A	Uncut (0hpa) 4	25.44		8.25333	0.327717	0.321715	2.57279
		E2	pgam1A	Uncut (0hpa) 4	25.48		8.29333	0.318756
		E3	pgam1A	Uncut (0hpa) 4	25.48		8.29333	0.318756
		E7	pgam1A	6hpa 4	23.02		6.88667	0.845097	0.827706
		E8	pgam1A	6hpa 4	23.11		6.97667	0.793988
		E9	pgam1A	6hpa 4	23.02		6.88667	0.845097
		F1	pkma	Uncut (0hpa) 4	24.18		6.99333	0.784868	0.713931	3.20428
		F2	pkma	Uncut (0hpa) 4	24.51		7.32333	0.624392
		F3	pkma	Uncut (0hpa) 4	24.26		7.07333	0.742531
		F7	pkma	6hpa 4	21.61		5.47667	2.24574	2.28763
		F8	pkma	6hpa 4	21.88		5.74667	1.86243
		F9	pkma	6hpa 4	21.26		5.12667	2.86233
		G1	ldha	Uncut (0hpa) 4	26.59		9.40333	0.147678	0.145308	3.79298
		G2	ldha	Uncut (0hpa) 4	26.52		9.33333	0.15502
		G3	ldha	Uncut (0hpa) 4	26.73		9.54333	0.13402
		G7	ldha	6hpa 4	23.68		7.54667	0.534844	0.551152
		G8	ldha	6hpa 4	23.53		7.39667	0.593446
		G9	ldha	6hpa 4	23.7		7.56667	0.52748
		H1	pdha1b	Uncut (0hpa) 4	32.19		15.0033	0.00304471	0.00242778	0.155681
		H2	pdha1b	Uncut (0hpa) 4	32.35		15.1633	0.0027251
		H3	pdha1b	Uncut (0hpa) 4	33.01		15.8233	0.00172465
		H7	pdha1b	6hpa 4	34.02		17.8867	0.000412645	0.00037796
		H8	pdha1b	6hpa 4	34.16		18.0267	0.000374483
		H9	pdha1b	6hpa 4	34.26		18.1267	0.000349405
		A4	dlat	Uncut (0hpa) 4	24.52		7.33333	0.620079	0.620079	1.67791
		A5	dlat	Uncut (0hpa) 4	24.52		7.33333	0.620079
		A6	dlat	Uncut (0hpa) 4	24.52		7.33333	0.620079
		A10	dlat	6hpa 4	22.58		6.44667	1.14646	1.04044
		A11	dlat	6hpa 4	22.84		6.70667	0.957397
		A12	dlat	6hpa 4	22.74		6.60667	1.02611
		B4	coa5	Uncut (0hpa) 4	28.35		11.1633	0.0436015	0.0366644	2.78305
		B5	coa5	Uncut (0hpa) 4	28.79		11.6033	0.0321402
		B6	coa5	Uncut (0hpa) 4	28.66		11.4733	0.0351708
		B10	coa5	6hpa 4	26.13		9.99667	0.0978821	0.102039
		B11	coa5	6hpa 4	25.95		9.81667	0.110889
		B12	coa5	6hpa 4	26.13		9.99667	0.0978821
		C4	cox6c	Uncut (0hpa) 4	22.22		5.03333	3.05362	2.86233	0.52003
		C5	cox6c	Uncut (0hpa) 4	22.42		5.23333	2.65833
		C6	cox6c	Uncut (0hpa) 4	22.3		5.11333	2.88891
		C10	cox6c	6hpa 4	22.06		5.92667	1.64398	1.4885
		C11	cox6c	6hpa 4	22.26		6.12667	1.43116
		C12	cox6c	6hpa 4	22.29		6.15667	1.40171
		A1	ef1α	Uncut (0hpa) 4	18.02	17.8167
		A2	ef1α	Uncut (0hpa) 4	17.84
		A3	ef1α	Uncut (0hpa) 4	17.59
		A7	ef1α	6hpa 4	16.67	16.5733
		A8	ef1α	6hpa 4	16.48
		A9	ef1α	6hpa 4	16.57
		B1	hk2	Uncut (0hpa) 4	26.79		8.97333	0.198956	0.209331	1.83613
		B2	hk2	Uncut (0hpa) 4	26.59		8.77333	0.228541
		B3	hk2	Uncut (0hpa) 4	26.77		8.95333	0.201734
		B7	hk2	6hpa 4	24.62		8.04667	0.378192	0.384358
		B8	hk2	6hpa 4	24.58		8.00667	0.388824
		B9	hk2	6hpa 4	24.59		8.01667	0.386138
		C1	aldoaa	Uncut (0hpa) 4	24.28		6.46333	1.13329	1.13592	1.7411
		C2	aldoaa	Uncut (0hpa) 4	24.37		6.55333	1.06476
		C3	aldoaa	Uncut (0hpa) 4	24.18		6.36333	1.21464
		C7	aldoaa	6hpa 4	22.54		5.96667	1.59902	1.97774
		C8	aldoaa	6hpa 4	21.95		5.37667	2.40692
		C9	aldoaa	6hpa 4	22.21		5.63667	2.00999
		D1	gapdhs	Uncut (0hpa) 4	23.92		6.10333	1.4545	1.35396	2.21914
		D2	gapdhs	Uncut (0hpa) 4	23.91		6.09333	1.46462
		D3	gapdhs	Uncut (0hpa) 4	24.24		6.42333	1.16516
		D7	gapdhs	6hpa 4	21.6		5.02667	3.06777	3.00463
		D8	gapdhs	6hpa 4	21.51		4.93667	3.26524
		D9	gapdhs	6hpa 4	21.78		5.20667	2.70793
		E1	pgam1B	Uncut (0hpa) 4	26.65		8.83333	0.219231	0.214224	0.89296
		E2	pgam1B	Uncut (0hpa) 4	26.6		8.78333	0.226962
		E3	pgam1B	Uncut (0hpa) 4	26.8		8.98333	0.197582
		E7	pgam1B	6hpa 4	25.73		9.15667	0.175214	0.191293
		E8	pgam1B	6hpa 4	25.57		8.99667	0.195764
		E9	pgam1B	6hpa 4	25.51		8.93667	0.204078
		F1	eno1a	Uncut (0hpa) 4	31.89		14.0733	0.00580102	0.0069466	2.78949
		F2	eno1a	Uncut (0hpa) 4	31.44		13.6233	0.00792443
		F3	eno1a	Uncut (0hpa) 4	31.56		13.7433	0.00729196
		F7	eno1a	6hpa 4	29.16		12.5867	0.0162568	0.0193775
		F8	eno1a	6hpa 4	28.9		12.3267	0.0194672
		F9	eno1a	6hpa 4	28.66		12.0867	0.0229906
		A4	pdha1a	Uncut (0hpa) 4	25.78		7.96333	0.40068	0.434428	1.00231
		A5	pdha1a	Uncut (0hpa) 4	25.54		7.72333	0.4732
		A6	pdha1a	Uncut (0hpa) 4	25.67		7.85333	0.432425
		A10	pdha1a	6hpa 4	24.35		7.77667	0.456026	0.435433
		A11	pdha1a	6hpa 4	24.33		7.75667	0.462392
		A12	pdha1a	6hpa 4	24.57		7.99667	0.391529
		B4	sdhdb	Uncut (0hpa) 4	25.05		7.23333	0.664584	0.676982	1.50525
		B5	sdhdb	Uncut (0hpa) 4	25.04		7.22333	0.669206
		B6	sdhdb	Uncut (0hpa) 4	24.98		7.16333	0.697625
		B10	sdhdb	6hpa 4	23.39		6.81667	0.887113	1.01903
		B11	sdhdb	6hpa 4	23.11		6.53667	1.07713
		B12	sdhdb	6hpa 4	23.07		6.49667	1.10741
		C4	mdh2	Uncut (0hpa) 4	21.61		3.79333	7.21262	5.7379	0.68302
		C5	mdh2	Uncut (0hpa) 4	21.91		4.09333	5.85847
		C6	mdh2	Uncut (0hpa) 4	22.3		4.48333	4.47077
		C10	mdh2	6hpa 4	20.87		4.29667	5.08832	3.9191
		C11	mdh2	6hpa 4	21.29		4.71667	3.80314
		C12	mdh2	6hpa 4	21.58		5.00667	3.11059
		D4	ndufv2	Uncut (0hpa) 4	27.55		9.73333	0.117483	0.104424	1.46747
		D5	ndufv2	Uncut (0hpa) 4	27.61		9.79333	0.112697
		D6	ndufv2	Uncut (0hpa) 4	28		10.1833	0.0860025
		D10	ndufv2	6hpa 4	25.52		8.94667	0.202668	0.153239
		D11	ndufv2	6hpa 4	25.99		9.41667	0.146319
		D12	ndufv2	6hpa 4	26.26		9.68667	0.121345
		E4	coa3	Uncut (0hpa) 4	30.25		12.4333	0.0180798	0.0161073	2.3511
		E5	coa3	Uncut (0hpa) 4	30.06		12.2433	0.0206248
		E6	coa3	Uncut (0hpa) 4	30.94		13.1233	0.0112068
		E10	coa3	6hpa 4	27.83		11.2567	0.0408701	0.0378697
		E11	coa3	6hpa 4	28.06		11.4867	0.0348473
		E12	coa3	6hpa 4	27.93		11.3567	0.0381332
		A1	ef1α	Uncut (0hpa) 4	18.11	18.01
		A2	ef1α	Uncut (0hpa) 4	18
		A3	ef1α	Uncut (0hpa) 4	17.92
		A4	ef1α	6hpa 4	16.92	16.9633
		A5	ef1α	6hpa 4	16.95
		A6	ef1α	6hpa 4	17.02
		B1	aco2	Uncut (0hpa) 4	25.21		7.2	0.680118	0.696015	2.27626
		B2	aco2	Uncut (0hpa) 4	25.27		7.26	0.652412
		B3	aco2	Uncut (0hpa) 4	25.05		7.04	0.759887
		B4	aco2	6hpa 4	22.86		5.89667	1.67852	1.58431
		B5	aco2	6hpa 4	23.08		6.11667	1.44112
		B6	aco2	6hpa 4	22.89		5.92667	1.64398
		E1	cs	Uncut (0hpa) 4	24.28		6.27	1.29581	1.28389	1.26284
		E2	cs	Uncut (0hpa) 4	24.27		6.26	1.30482
		E3	cs	Uncut (0hpa) 4	24.33		6.32	1.25167
		E4	cs	6hpa 4	22.98		6.01667	1.54455	1.62134
		E5	cs	6hpa 4	22.8		5.83667	1.7498
		E6	cs	6hpa 4	22.95		5.98667	1.57701
	5	A1	ef1α	Uncut (0hpa) 5	17.88	17.8233
		A2	ef1α	Uncut (0hpa) 5	17.66
		A3	ef1α	Uncut (0hpa) 5	17.93
		A7	ef1α	6hpa 5	16.88	16.74
		A8	ef1α	6hpa 5	16.58
		A9	ef1α	6hpa 5	16.76
		C1	hk1	Uncut (0hpa) 5	29.15		11.3267	0.0389344	0.0370048	2.1386
		C2	hk1	Uncut (0hpa) 5	29.18		11.3567	0.0381332
		C3	hk1	Uncut (0hpa) 5	29.34		11.5167	0.0341301
		C7	hk1	6hpa 5	27.01		10.27	0.0809882	0.0791385
		C8	hk1	6hpa 5	27.04		10.3	0.0793215
		C9	hk1	6hpa 5	27.08		10.34	0.0771525
		D1	pfkpa	Uncut (0hpa) 5	27.52		9.69667	0.120507	0.119123	3.20428
		D2	pfkpa	Uncut (0hpa) 5	27.44		9.61667	0.127378
		D3	pfkpa	Uncut (0hpa) 5	27.65		9.82667	0.110123
		D7	pfkpa	6hpa 5	24.91		8.17	0.347204	0.381703
		D8	pfkpa	6hpa 5	24.81		8.07	0.372124
		D9	pfkpa	6hpa 5	24.6		7.86	0.430432
		E1	pgam1A	Uncut (0hpa) 5	26.37		8.54667	0.267422	0.280069	1.58008
		E2	pgam1A	Uncut (0hpa) 5	26.02		8.19667	0.340845
		E3	pgam1A	Uncut (0hpa) 5	26.52		8.69667	0.241014
		E7	pgam1A	6hpa 5	24.25		7.51	0.548611	0.442533
		E8	pgam1A	6hpa 5	24.62		7.88	0.424506
		E9	pgam1A	6hpa 5	24.81		8.07	0.372124
		F1	pkma	Uncut (0hpa) 5	25.25		7.42667	0.581233	0.544822	2.95536
		F2	pkma	Uncut (0hpa) 5	25.31		7.48667	0.557556
		F3	pkma	Uncut (0hpa) 5	25.47		7.64667	0.499027
		F7	pkma	6hpa 5	22.87		6.13	1.42786	1.61014
		F8	pkma	6hpa 5	22.69		5.95	1.6176
		F9	pkma	6hpa 5	22.53		5.79	1.80733
		G1	ldha	Uncut (0hpa) 5	27.25		9.42667	0.145308	0.128858	2.80889
		G2	ldha	Uncut (0hpa) 5	27.53		9.70667	0.119675
		G3	ldha	Uncut (0hpa) 5	27.49		9.66667	0.123039
		G7	ldha	6hpa 5	24.92		8.18	0.344806	0.361948
		G8	ldha	6hpa 5	24.97		8.23	0.333061
		G9	ldha	6hpa 5	24.66		7.92	0.412898
		H1	pdha1b	Uncut (0hpa) 5	34.37		16.5467	0.00104462	0.000860337	0.19751
		H2	pdha1b	Uncut (0hpa) 5	34.74		16.9167	0.000808306
		H3	pdha1b	Uncut (0hpa) 5	34.84		17.0167	0.000754176
		H7	pdha1b	6hpa 5	36.52		19.78	0.000111078	0.000169925
		H8	pdha1b	6hpa 5	35.49		18.75	0.000226823
		H9	pdha1b	6hpa 5	35.71		18.97	0.000194743
		A4	dlat	Uncut (0hpa) 5	25.23		7.40667	0.589347	0.669206	1.34412
		A5	dlat	Uncut (0hpa) 5	25.04		7.21667	0.672306
		A6	dlat	Uncut (0hpa) 5	24.87		7.04667	0.756383
		A10	dlat	6hpa 5	23.35		6.61	1.02374	0.899496
		A11	dlat	6hpa 5	23.51		6.77	0.916277
		A12	dlat	6hpa 5	23.75		7.01	0.775854
		B4	coa5	Uncut (0hpa) 5	29.64		11.8167	0.0277223	0.0296434	2.14355
		B5	coa5	Uncut (0hpa) 5	29.63		11.8067	0.0279151
		B6	coa5	Uncut (0hpa) 5	29.36		11.5367	0.0336602
		B10	coa5	6hpa 5	27.35		10.61	0.0639841	0.0635421
		B11	coa5	6hpa 5	27.6		10.86	0.053804
		B12	coa5	6hpa 5	27.13		10.39	0.0745244
		C4	cox6c	Uncut (0hpa) 5	23.01		5.18667	2.74573	2.71419	1.76949
		C5	cox6c	Uncut (0hpa) 5	22.97		5.14667	2.82292
		C6	cox6c	Uncut (0hpa) 5	23.1		5.27667	2.57968
		C10	cox6c	6hpa 5	21.16		4.42	4.6714	4.80273
		C11	cox6c	6hpa 5	21.19		4.45	4.57527
		C12	cox6c	6hpa 5	21.01		4.27	5.18325
		A1	ef1α	Uncut (0hpa) 5	17.77	17.7867
		A2	ef1α	Uncut (0hpa) 5	17.87
		A3	ef1α	Uncut (0hpa) 5	17.72
		A7	ef1α	6hpa 5	16.87	16.6967
		A8	ef1α	6hpa 5	16.51
		A9	ef1α	6hpa 5	16.71
		B1	hk2	Uncut (0hpa) 5	26.55		8.76333	0.23013	0.260109	1.22547
		B2	hk2	Uncut (0hpa) 5	26.25		8.46333	0.283324
		B3	hk2	Uncut (0hpa) 5	26.32		8.53333	0.269905
		B7	hk2	6hpa 5	25.01		8.31333	0.314367	0.318756
		B8	hk2	6hpa 5	24.93		8.23333	0.332292
		B9	hk2	6hpa 5	25.03		8.33333	0.310039
		C1	aldoaa	Uncut (0hpa) 5	24.33		6.54333	1.07216	0.718897	1.64338
		C2	aldoaa	Uncut (0hpa) 5	26.01		8.22333	0.334603
		C3	aldoaa	Uncut (0hpa) 5	24.38		6.59333	1.03564
		C7	aldoaa	6hpa 5	22.87		6.17333	1.38561	1.18142
		C8	aldoaa	6hpa 5	23.21		6.51333	1.09469
		C9	aldoaa	6hpa 5	23.22		6.52333	1.08713
		D1	gapdhs	Uncut (0hpa) 5	24.03		6.24333	1.31999	1.47822	1.66248
		D2	gapdhs	Uncut (0hpa) 5	23.44		5.65333	1.9869
		D3	gapdhs	Uncut (0hpa) 5	24.13		6.34333	1.23159
		D7	gapdhs	6hpa 5	22.03		5.33333	2.48031	2.4575
		D8	gapdhs	6hpa 5	22.11		5.41333	2.34652
		D9	gapdhs	6hpa 5	21.99		5.29333	2.55005
		E1	pgam1B	Uncut (0hpa) 5	26.16		8.37333	0.301561	0.276853	0.622725
		E2	pgam1B	Uncut (0hpa) 5	26.31		8.52333	0.271782
		E3	pgam1B	Uncut (0hpa) 5	26.38		8.59333	0.25891
		E7	pgam1B	6hpa 5	25.76		9.06333	0.186924	0.172403
		E8	pgam1B	6hpa 5	26.16		9.46333	0.141662
		E9	pgam1B	6hpa 5	25.71		9.01333	0.193516
		F1	eno1a	Uncut (0hpa) 5	31.17		13.3833	0.00935869	0.0097336	1.4914
		F2	eno1a	Uncut (0hpa) 5	31.13		13.3433	0.0096218
		F3	eno1a	Uncut (0hpa) 5	31.04		13.2533	0.0102412
		F7	eno1a	6hpa 5	29.51		12.8133	0.0138932	0.0145167
		F8	eno1a	6hpa 5	29.62		12.9233	0.0128733
		F9	eno1a	6hpa 5	29.21		12.5133	0.0171045
		A4	pdha1a	Uncut (0hpa) 5	26.32		8.53333	0.269905	0.296723	1.56193
		A5	pdha1a	Uncut (0hpa) 5	26.08		8.29333	0.318756
		A6	pdha1a	Uncut (0hpa) 5	26.15		8.36333	0.303659
		A10	pdha1a	6hpa 5	24.39		7.69333	0.483143	0.463462
		A11	pdha1a	6hpa 5	24.38		7.68333	0.486504
		A12	pdha1a	6hpa 5	24.58		7.88333	0.423526
		B4	sdhdb	Uncut (0hpa) 5	25.16		7.37333	0.603122	0.598956	1.31646
		B5	sdhdb	Uncut (0hpa) 5	25.12		7.33333	0.620079
		B6	sdhdb	Uncut (0hpa) 5	25.23		7.44333	0.574557
		B10	sdhdb	6hpa 5	24.06		7.36333	0.607318	0.788504
		B11	sdhdb	6hpa 5	23.43		6.73333	0.939863
		B12	sdhdb	6hpa 5	23.56		6.86333	0.858877
		C4	mdh2	Uncut (0hpa) 5	22.11		4.32333	4.99513	4.72568	0.831238
		C5	mdh2	Uncut (0hpa) 5	22.35		4.56333	4.2296
		C6	mdh2	Uncut (0hpa) 5	22.11		4.32333	4.99513
		C10	mdh2	6hpa 5	21.24		4.54333	4.28865	3.92817
		C11	mdh2	6hpa 5	21.43		4.73333	3.75945
		C12	mdh2	6hpa 5	21.43		4.73333	3.75945
		D4	ndufv2	Uncut (0hpa) 5	27.63		9.84333	0.108858	0.0874048	1.61702
		D5	ndufv2	Uncut (0hpa) 5	27.88		10.0933	0.0915385
		D6	ndufv2	Uncut (0hpa) 5	28.33		10.5433	0.0670101
		D10	ndufv2	6hpa 5	26.36		9.66333	0.123324	0.141335
		D11	ndufv2	6hpa 5	26.01		9.31333	0.157184
		D12	ndufv2	6hpa 5	26.12		9.42333	0.145644
		E4	coa3	Uncut (0hpa) 5	31.1		13.3133	0.00982398	0.00946744	3.18215
		E5	coa3	Uncut (0hpa) 5	30.99		13.2033	0.0106023
		E6	coa3	Uncut (0hpa) 5	31.37		13.5833	0.00814722
		E10	coa3	6hpa 5	28.63		11.9333	0.0255687	0.0301268
		E11	coa3	6hpa 5	28.26		11.5633	0.0330438
		E12	coa3	6hpa 5	28.29		11.5933	0.0323638
		A1	ef1α	Uncut (0hpa) 5	18.23	18.05
		A2	ef1α	Uncut (0hpa) 5	18.04
		A3	ef1α	Uncut (0hpa) 5	17.88
		A4	ef1α	6hpa 5	16.75	16.7733
		A5	ef1α	6hpa 5	17.03
		A6	ef1α	6hpa 5	16.54
		B1	aco2	Uncut (0hpa) 5	24.93		6.88	0.849012	0.792156	1.45062
		B2	aco2	Uncut (0hpa) 5	24.9		6.85	0.866851
		B3	aco2	Uncut (0hpa) 5	25.26		7.21	0.67542
		B4	aco2	6hpa 5	23.23		6.45667	1.13854	1.14911
		B5	aco2	6hpa 5	23.21		6.43667	1.15444
		B6	aco2	6hpa 5	23.21		6.43667	1.15444
		E1	cs	Uncut (0hpa) 5	24.26		6.21	1.35084	1.42457	1.10445
		E2	cs	Uncut (0hpa) 5	24.21		6.16	1.39848
		E3	cs	Uncut (0hpa) 5	24.08		6.03	1.53034
		E4	cs	6hpa 5	22.85		6.07667	1.48163	1.57337
		E5	cs	6hpa 5	22.81		6.03667	1.52329
		E6	cs	6hpa 5	22.63		5.85667	1.72571

## Sheet: Fig2D
													Summary of Fold Changes
	Biological Replicate	Position	Gene Name	Sample name	Cq values	Average Cq values House keeping gene (ef1a)	dCq	Log2	geoMean	Relative Fold Change
	1	A1	ef1α	Uncut (0hpa) 1	16.47	16.58							hk1					hk2					pfkpa
		A2	ef1α	Uncut (0hpa) 1	16.93									Uncut (0hpa)	24hpa	Fold Change			Uncut (0hpa)	24hpa	Fold Change			Uncut (0hpa)	24hpa	Fold Change
		A3	ef1α	Uncut (0hpa) 1	16.34								Biological Rep 1	0.0388446	0.126791	3.26406		Biological Rep 1	0.216213	0.239349	1.10701		Biological Rep 1	0.0913273	0.341634	3.74076
		A7	ef1α	24hpa 1	16	15.9533							Biological Rep 2	0.0490543	0.107608	2.19365		Biological Rep 2	0.292638	0.298098	1.01866		Biological Rep 2	0.132481	0.428447	3.23403
		A8	ef1α	24hpa 1	15.92								Biological Rep 3	0.0355795	0.0906964	2.54912		Biological Rep 3	0.199416	0.232804	1.16743		Biological Rep 3	0.121065	0.384358	3.1748
		A9	ef1α	24hpa 1	15.94								Biological Rep 4	0.0442102	0.0784104	1.77358		Biological Rep 4	0.327717	0.316554	0.965936		Biological Rep 4	0.175619	0.562733	3.20428
		C1	hk1	Uncut (0hpa) 1	27.59		11.01	0.0484908	0.0388446	3.26406
		C2	hk1	Uncut (0hpa) 1	27.8		11.22	0.0419221
		C3	hk1	Uncut (0hpa) 1	28.34		11.76	0.0288328					aldoaa					gapdhs					pgam1A
		C7	hk1	24hpa 1	25.76		9.80667	0.11166	0.126791					Uncut (0hpa)	24hpa	Fold Change			Uncut (0hpa)	24hpa	Fold Change			Uncut (0hpa)	24hpa	Fold Change
		C8	hk1	24hpa 1	25.63		9.67667	0.122189					Biological Rep 1	1.07464	1.4714	1.3692		Biological Rep 1	1.05985	2.71419	2.56093		Biological Rep 1	0.167689	0.587987	3.50642
		C9	hk1	24hpa 1	25.34		9.38667	0.149394					Biological Rep 2	1.21464	1.50232	1.23685		Biological Rep 2	1.84957	3.4674	1.87471		Biological Rep 2	0.235509	0.752896	3.19688
		D1	pfkpa	Uncut (0hpa) 1	26.77		10.19	0.085606	0.0913273	3.74076			Biological Rep 3	1.03804	1.4748	1.42076		Biological Rep 3	1.20624	2.42927	2.01391		Biological Rep 3	0.107857	0.496726	4.60542
		D2	pfkpa	Uncut (0hpa) 1	26.64		10.06	0.0936781					Biological Rep 4	1.28093	2.05697	1.60585		Biological Rep 4	2.00072	6.72961	3.36359		Biological Rep 4	0.24779	1.08964	4.39745
		D3	pfkpa	Uncut (0hpa) 1	26.62		10.04	0.0949858
		D7	pfkpa	24hpa 1	23.98		8.02667	0.383471	0.341634
		D8	pfkpa	24hpa 1	24.25		8.29667	0.31802					pgam1B					eno1a					pkma
		D9	pfkpa	24hpa 1	24.21		8.25667	0.326961						Uncut (0hpa)	24hpa	Fold Change			Uncut (0hpa)	24hpa	Fold Change			Uncut (0hpa)	24hpa	Fold Change
		E1	pgam1A	Uncut (0hpa) 1	25.79		9.21	0.168855	0.167689	3.50642			Biological Rep 1	0.2022	0.2366	1.17013		Biological Rep 1	0.102039	0.225916	2.21402		Biological Rep 1	0.486504	1.11254	2.2868
		E2	pgam1A	Uncut (0hpa) 1	25.73		9.15	0.176025					Biological Rep 2	0.226438	0.189533	0.83702		Biological Rep 2	0.115331	0.205023	1.77769		Biological Rep 2	1.18415	1.62134	1.3692
		E3	pgam1A	Uncut (0hpa) 1	25.88		9.3	0.158643					Biological Rep 3	0.192624	0.241014	1.25122		Biological Rep 3	0.0827856	0.176841	2.13613		Biological Rep 3	0.571908	1.1023	1.92741
		E7	pgam1A	24hpa 1	23.3		7.34667	0.614374	0.587987				Biological Rep 4	0.266189	0.266805	1.00231		Biological Rep 4	0.24269	0.157547	0.649169		Biological Rep 4	0.792156	2.03805	2.57279
		E8	pgam1A	24hpa 1	23.39		7.43667	0.577219
		E9	pgam1A	24hpa 1	23.4		7.44667	0.573231
		F1	pkma	Uncut (0hpa) 1	24.04		7.46	0.567958	0.486504	2.2868			ldha					pdha1a					pdha1b
		F2	pkma	Uncut (0hpa) 1	24.19		7.61	0.511872						Uncut (0hpa)	24hpa	Fold Change			Uncut (0hpa)	24hpa	Fold Change			Uncut (0hpa)	24hpa	Fold Change
		F3	pkma	Uncut (0hpa) 1	24.56		7.98	0.396078					Biological Rep 1	0.124469	0.570589	4.58419		Biological Rep 1	0.296038	0.54988	1.85746		Biological Rep 1	0.000932801	0.000407906	0.437291
		F7	pkma	24hpa 1	22.6		6.64667	0.998054	1.11254				Biological Rep 2	0.18435	0.571908	3.10229		Biological Rep 2	0.479806	0.730618	1.52274		Biological Rep 2	0.000301725	0.000124106	0.41132
		F8	pkma	24hpa 1	22.2		6.24667	1.31694					Biological Rep 3	0.0726542	0.456026	6.27667		Biological Rep 3	0.379943	0.526263	1.38511		Biological Rep 3	0.000327517	0.000185	0.564857
		F9	pkma	24hpa 1	22.53		6.57667	1.04767					Biological Rep 4	0.24269	1.49885	6.17597		Biological Rep 4	0.605916	0.519018	0.856584		Biological Rep 4	0.000606946	7.90901e-05	0.130308
		G1	ldha	Uncut (0hpa) 1	26.04		9.46	0.14199	0.124469	4.58419
		G2	ldha	Uncut (0hpa) 1	26.44		9.86	0.107608
		G3	ldha	Uncut (0hpa) 1	26.21		9.63	0.126206					dlat					cs					aco2
		G7	ldha	24hpa 1	23.49		7.53667	0.538564	0.570589					Uncut (0hpa)	24hpa	Fold Change			Uncut (0hpa)	24hpa	Fold Change			Uncut (0hpa)	24hpa	Fold Change
		G8	ldha	24hpa 1	23.64		7.68667	0.485381					Biological Rep 1	0.493295	0.8749	1.77358		Biological Rep 1	1.09976	1.59165	1.44727		Biological Rep 1	0.54988	1.58066	2.87454
		G9	ldha	24hpa 1	23.09		7.13667	0.710639					Biological Rep 2	0.618648	1.00036	1.61702		Biological Rep 2	1.52681	1.65159	1.08172		Biological Rep 2	0.812547	1.43448	1.76541
		H1	pdha1b	Uncut (0hpa) 1	33.25		16.67	0.000959025	0.000872347	0.467596			Biological Rep 3	0.504825	0.878952	1.7411		Biological Rep 3	1.33532	1.97774	1.4811		Biological Rep 3	0.471019	1.42457	3.02444
		H2	pdha1b	Uncut (0hpa) 1	33.58		17	0.000762939					Biological Rep 4	0.899496	1.03087	1.14605		Biological Rep 4	1.62885	1.76605	1.08423		Biological Rep 4	0.905753	2.03805	2.25012
		H3	pdha1b	Uncut (0hpa) 1	33.33		16.75	0.000907293
		H7	pdha1b	24hpa 1	34.17		18.2167	0.000328274	0.000407906
		H8	pdha1b	24hpa 1	33.64		17.6867	0.000474005					sdhdb					mdh2					ndufv2
		H9	pdha1b	24hpa 1	33.76		17.8067	0.000436173						Uncut (0hpa)	24hpa	Fold Change			Uncut (0hpa)	24hpa	Fold Change			Uncut (0hpa)	24hpa	Fold Change
		A4	dlat	Uncut (0hpa) 1	24.13		7.55	0.533609	0.493295	1.77358			Biological Rep 1	0.457081	1.09216	2.38943		Biological Rep 1	4.40922	5.14744	1.16743		Biological Rep 1	0.102039	0.225916	2.21402
		A5	dlat	Uncut (0hpa) 1	24.18		7.6	0.515433					Biological Rep 2	0.637511	1.29282	2.02792		Biological Rep 2	6.68312	6.02317	0.90125		Biological Rep 2	0.115331	0.205023	1.77769
		A6	dlat	Uncut (0hpa) 1	24.42		7.84	0.43644					Biological Rep 3	0.438462	1.06476	2.42839		Biological Rep 3	4.05731	5.49146	1.35347		Biological Rep 3	0.0827856	0.176841	2.13613
		A10	dlat	24hpa 1	22.52		6.56667	1.05496	0.8749				Biological Rep 4	0.67542	1.26329	1.87038		Biological Rep 4	6.56073	5.07658	0.773782		Biological Rep 4	0.24269	0.157547	0.649169
		A11	dlat	24hpa 1	22.77		6.81667	0.887113
		A12	dlat	24hpa 1	23.08		7.12667	0.715582
		B4	coa5	Uncut (0hpa) 1	28.23		11.65	0.0311172	0.0293707	3.31728			cox6c					coa3					coa5
		B5	coa5	Uncut (0hpa) 1	28.39		11.81	0.0278507						Uncut (0hpa)	24hpa	Fold Change			Uncut (0hpa)	24hpa	Fold Change			Uncut (0hpa)	24hpa	Fold Change
		B6	coa5	Uncut (0hpa) 1	28.32		11.74	0.0292353					Biological Rep 1	2.25093	4.7039	2.08975		Biological Rep 1	0.0109004	0.0445177	4.08405		Biological Rep 1	0.0293707	0.0974309	3.31728
		B10	coa5	24hpa 1	25.87		9.91667	0.103463	0.0974309				Biological Rep 2	2.58564	6.1925	2.39496		Biological Rep 2	0.0175854	0.0519712	2.95536		Biological Rep 2	0.0346866	0.105393	3.03845
		B11	coa5	24hpa 1	26.15		10.1967	0.0852114					Biological Rep 3	2.00535	5.26776	2.62685		Biological Rep 3	0.0111037	0.0479339	4.31691		Biological Rep 3	0.0304065	0.0834577	2.74473
		B12	coa5	24hpa 1	25.85		9.89667	0.104907					Biological Rep 4	4.49148	8.79808	1.95884		Biological Rep 4	0.0289664	0.0477129	1.64718		Biological Rep 4	0.0435009	0.0900699	2.07053
		C4	cox6c	Uncut (0hpa) 1	22.07		5.49	2.22508	2.25093	2.08975
		C5	cox6c	Uncut (0hpa) 1	22.03		5.45	2.28763					mpc1					mpc2					pdk3a
		C6	cox6c	Uncut (0hpa) 1	22.06		5.48	2.24056						Uncut (0hpa)	24hpa	Fold Change			Uncut (0hpa)	24hpa	Fold Change			Uncut (0hpa)	24hpa	Fold Change
		C10	cox6c	24hpa 1	20.33		4.37667	4.81384	4.7039				Biological Rep 1	0.269282	0.438462	1.62826		Biological Rep 1	0.752896	1.01903	1.35347		Biological Rep 1	0.023528	0.0170257	0.723635
		C11	cox6c	24hpa 1	20.47		4.51667	4.36866					Biological Rep 2	0.310039	0.411945	1.32869		Biological Rep 2	0.841201	0.933371	1.10957		Biological Rep 2	0.0175448	0.015309	0.872564
		C12	cox6c	24hpa 1	20.29		4.33667	4.94918					Biological Rep 3	0.369554	0.370409	1.00231		Biological Rep 3	1.03564	0.933371	0.90125		Biological Rep 3	0.0228318	0.0198763	0.870551
		A1	ef1α	Uncut (0hpa) 1	17.57	17.62							Biological Rep 4			#DIV/0!		Biological Rep 4			#DIV/0!		Biological Rep 4			#DIV/0!
		A2	ef1α	Uncut (0hpa) 1	17.69
		A3	ef1α	Uncut (0hpa) 1	17.6
		A7	ef1α	24hpa 1	16.9	16.69							pdk3b					gls					glud1a
		A8	ef1α	24hpa 1	16.55									Uncut (0hpa)	24hpa	Fold Change			Uncut (0hpa)	24hpa	Fold Change			Uncut (0hpa)	24hpa	Fold Change
		A9	ef1α	24hpa 1	16.62								Biological Rep 1	0.0411544	0.0109762	0.266708		Biological Rep 1	0.0502009	0.0599757	1.19472		Biological Rep 1	1.52681	1.8199	1.19196
		B1	hk2	Uncut (0hpa) 1	26.51		8.89	0.210787	0.216213	1.10701			Biological Rep 2	0.0378697	0.00498056	0.131518		Biological Rep 2	0.0726542	0.0762663	1.04972		Biological Rep 2	1.98232	1.49194	0.752623
		B2	hk2	Uncut (0hpa) 1	26.5		8.88	0.212253					Biological Rep 3	0.0416326	0.0139253	0.334482		Biological Rep 3	0.0580668	0.0994781	1.71317		Biological Rep 3	1.20068	1.61387	1.34412
		B3	hk2	Uncut (0hpa) 1	26.41		8.79	0.225916					Biological Rep 4			#DIV/0!		Biological Rep 4			#DIV/0!		Biological Rep 4			#DIV/0!
		B7	hk2	24hpa 1	25.38		8.69	0.24213	0.239349
		B8	hk2	24hpa 1	25.38		8.69	0.24213					glud1b
		B9	hk2	24hpa 1	25.43		8.74	0.233883						Uncut (0hpa)	24hpa	Fold Change
		C1	aldoaa	Uncut (0hpa) 1	24.18		6.56	1.05985	1.07464	1.3692			Biological Rep 1	0.587987	0.634572	1.07923
		C2	aldoaa	Uncut (0hpa) 1	24.11		6.49	1.11254					Biological Rep 2	0.483143	0.515433	1.06683
		C3	aldoaa	Uncut (0hpa) 1	24.19		6.57	1.05253					Biological Rep 3	0.631647	0.933371	1.47768
		C7	aldoaa	24hpa 1	23.05		6.36	1.21744	1.4714				Biological Rep 4			#DIV/0!
		C8	aldoaa	24hpa 1	22.66		5.97	1.59533
		C9	aldoaa	24hpa 1	22.62		5.93	1.64018
		D1	gapdhs	Uncut (0hpa) 1	24.24		6.62	1.01667	1.05985	2.56093
		D2	gapdhs	Uncut (0hpa) 1	23.9		6.28	1.28686
		D3	gapdhs	Uncut (0hpa) 1	24.4		6.78	0.909948
		D7	gapdhs	24hpa 1	21.78		5.09	2.93601	2.71419
		D8	gapdhs	24hpa 1	22.11		5.42	2.3357
		D9	gapdhs	24hpa 1	21.79		5.1	2.91573
		E1	pgam1B	Uncut (0hpa) 1	26.87		9.25	0.164238	0.2022	1.17013
		E2	pgam1B	Uncut (0hpa) 1	26.46		8.84	0.21822
		E3	pgam1B	Uncut (0hpa) 1	26.38		8.76	0.230663
		E7	pgam1B	24hpa 1	25.58		8.89	0.210787	0.2366
		E8	pgam1B	24hpa 1	25.51		8.82	0.221266
		E9	pgam1B	24hpa 1	25.15		8.46	0.283979
		F1	eno1a	Uncut (0hpa) 1	32.07		14.45	0.00446803	0.00385387	3.63008
		F2	eno1a	Uncut (0hpa) 1	32.52		14.9	0.00327079
		F3	eno1a	Uncut (0hpa) 1	32.26		14.64	0.00391671
		F7	eno1a	24hpa 1	29.52		12.83	0.0137336	0.0139898
		F8	eno1a	24hpa 1	29.58		12.89	0.0131742
		F9	eno1a	24hpa 1	29.38		12.69	0.0151332
		A4	pdha1a	Uncut (0hpa) 1	26.03		8.41	0.293994	0.296038	1.85746
		A5	pdha1a	Uncut (0hpa) 1	26		8.38	0.300171
		A6	pdha1a	Uncut (0hpa) 1	26.03		8.41	0.293994
		A10	pdha1a	24hpa 1	23.99		7.3	0.634572	0.54988
		A11	pdha1a	24hpa 1	24.02		7.33	0.621513
		A12	pdha1a	24hpa 1	24.58		7.89	0.421574
		B4	sdhdb	Uncut (0hpa) 1	25.32		7.7	0.480916	0.457081	2.38943
		B5	sdhdb	Uncut (0hpa) 1	25.59		7.97	0.398833
		B6	sdhdb	Uncut (0hpa) 1	25.27		7.65	0.497875
		B10	sdhdb	24hpa 1	23.42		6.73	0.942037	1.09216
		B11	sdhdb	24hpa 1	23.03		6.34	1.23444
		B12	sdhdb	24hpa 1	23.17		6.48	1.12028
		C4	mdh2	Uncut (0hpa) 1	22.03		4.41	4.7039	4.40922	1.16743
		C5	mdh2	Uncut (0hpa) 1	22.19		4.57	4.2101
		C6	mdh2	Uncut (0hpa) 1	22.15		4.53	4.32847
		C10	mdh2	24hpa 1	20.9		4.21	5.40336	5.14744
		C11	mdh2	24hpa 1	20.93		4.24	5.29216
		C12	mdh2	24hpa 1	21.08		4.39	4.76956
		D4	ndufv2	Uncut (0hpa) 1	27.46		9.84	0.10911	0.102039	2.21402
		D5	ndufv2	Uncut (0hpa) 1	27.42		9.8	0.112178
		D6	ndufv2	Uncut (0hpa) 1	27.79		10.17	0.086801
		D10	ndufv2	24hpa 1	25.39		8.7	0.240458	0.225916
		D11	ndufv2	24hpa 1	25.25		8.56	0.264962
		D12	ndufv2	24hpa 1	25.8		9.11	0.180974
		E4	coa3	Uncut (0hpa) 1	30.55		12.93	0.0128139	0.0109004	4.08405
		E5	coa3	Uncut (0hpa) 1	30.49		12.87	0.0133581
		E6	coa3	Uncut (0hpa) 1	31.31		13.69	0.00756658
		E10	coa3	24hpa 1	28.01		11.32	0.0391147	0.0445177
		E11	coa3	24hpa 1	27.61		10.92	0.0516122
		E12	coa3	24hpa 1	27.85		11.16	0.0437024
		A1	ef1α	Uncut (0hpa) 1	17.39	17.5367
		A2	ef1α	Uncut (0hpa) 1	17.71
		A3	ef1α	Uncut (0hpa) 1	17.51
		A4	ef1α	24hpa 1	16.87	16.7233
		A5	ef1α	24hpa 1	16.86
		A6	ef1α	24hpa 1	16.44
		B1	aco2	Uncut (0hpa) 1	25.18		7.64333	0.500181	0.54988	2.87454
		B2	aco2	Uncut (0hpa) 1	25.03		7.49333	0.554986
		B3	aco2	Uncut (0hpa) 1	24.92		7.38333	0.598956
		B4	aco2	24hpa 1	22.8		6.07667	1.48163	1.58066
		B5	aco2	24hpa 1	22.58		5.85667	1.72571
		B6	aco2	24hpa 1	22.74		6.01667	1.54455
		E1	cs	Uncut (0hpa) 1	24.01		6.47333	1.12547	1.09976	1.44727
		E2	cs	Uncut (0hpa) 1	24.11		6.57333	1.0501
		E3	cs	Uncut (0hpa) 1	24.01		6.47333	1.12547
		E4	cs	24hpa 1	22.67		5.94667	1.62134	1.59165
		E5	cs	24hpa 1	22.65		5.92667	1.64398
		E6	cs	24hpa 1	22.77		6.04667	1.51277
	2	A1	ef1α	Uncut (0hpa) 2	17.34	17.2167
		A2	ef1α	Uncut (0hpa) 2	17.18
		A3	ef1α	Uncut (0hpa) 2	17.13
		A7	ef1α	24hpa 2	17.21	17.11
		A8	ef1α	24hpa 2	16.95
		A9	ef1α	24hpa 2	17.17
		C1	hk1	Uncut (0hpa) 2	28.19		10.9733	0.0497391	0.0490543	2.19365
		C2	hk1	Uncut (0hpa) 2	28.28		11.0633	0.046731
		C3	hk1	Uncut (0hpa) 2	28.16		10.9433	0.0507842
		C7	hk1	24hpa 2	27.2		10.09	0.0917503	0.107608
		C8	hk1	24hpa 2	26.88		9.77	0.114535
		C9	hk1	24hpa 2	26.83		9.72	0.118574
		D1	pfkpa	Uncut (0hpa) 2	26.79		9.57333	0.131262	0.132481	3.23403
		D2	pfkpa	Uncut (0hpa) 2	26.7		9.48333	0.139712
		D3	pfkpa	Uncut (0hpa) 2	26.84		9.62333	0.126791
		D7	pfkpa	24hpa 2	25.06		7.95	0.4044	0.428447
		D8	pfkpa	24hpa 2	24.92		7.81	0.445611
		D9	pfkpa	24hpa 2	24.95		7.84	0.43644
		E1	pgam1A	Uncut (0hpa) 2	25.96		8.74333	0.233343	0.235509	3.19688
		E2	pgam1A	Uncut (0hpa) 2	25.87		8.65333	0.248363
		E3	pgam1A	Uncut (0hpa) 2	26.01		8.79333	0.225394
		E7	pgam1A	24hpa 2	24.16		7.05	0.754638	0.752896
		E8	pgam1A	24hpa 2	24.01		6.9	0.837323
		E9	pgam1A	24hpa 2	24.32		7.21	0.67542
		F1	pkma	Uncut (0hpa) 2	23.51		6.29333	1.27502	1.18415	1.3692
		F2	pkma	Uncut (0hpa) 2	23.55		6.33333	1.24016
		F3	pkma	Uncut (0hpa) 2	23.79		6.57333	1.0501
		F7	pkma	24hpa 2	23.15		6.04	1.51977	1.62134
		F8	pkma	24hpa 2	23.09		5.98	1.58431
		F9	pkma	24hpa 2	22.93		5.82	1.77013
		G1	ldha	Uncut (0hpa) 2	26.02		8.80333	0.223837	0.18435	3.10229
		G2	ldha	Uncut (0hpa) 2	26.6		9.38333	0.149739
		G3	ldha	Uncut (0hpa) 2	26.28		9.06333	0.186924
		G7	ldha	24hpa 2	24.59		7.48	0.560139	0.571908
		G8	ldha	24hpa 2	24.57		7.46	0.567958
		G9	ldha	24hpa 2	24.52		7.41	0.587987
		H1	pdha1b	Uncut (0hpa) 2	35.59		18.3733	0.000294493	0.000312005	0.397768
		H2	pdha1b	Uncut (0hpa) 2	35.52		18.3033	0.000309135
		H3	pdha1b	Uncut (0hpa) 2	35.41		18.1933	0.000333627
		H7	pdha1b	24hpa 2	36.59		19.48	0.000136753	0.000124106
		H8	pdha1b	24hpa 2	36.58		19.47	0.000137704
		H9	pdha1b	24hpa 2	37.02		19.91	0.000101506
		A4	dlat	Uncut (0hpa) 2	24.84		7.62333	0.507164	0.618648	1.61702
		A5	dlat	Uncut (0hpa) 2	24.42		7.20333	0.678548
		A6	dlat	Uncut (0hpa) 2	24.4		7.18333	0.68802
		A10	dlat	24hpa 2	23.54		6.43	1.15978	1.00036
		A11	dlat	24hpa 2	23.79		6.68	0.975258
		A12	dlat	24hpa 2	23.93		6.82	0.885066
		B4	coa5	Uncut (0hpa) 2	28.73		11.5133	0.0342091	0.0346866	3.03845
		B5	coa5	Uncut (0hpa) 2	28.81		11.5933	0.0323638
		B6	coa5	Uncut (0hpa) 2	28.59		11.3733	0.0376952
		B10	coa5	24hpa 2	26.9		9.79	0.112958	0.105393
		B11	coa5	24hpa 2	26.95		9.84	0.10911
		B12	coa5	24hpa 2	27.15		10.04	0.0949858
		C4	cox6c	Uncut (0hpa) 2	22.6		5.38333	2.39583	2.58564	2.39496
		C5	cox6c	Uncut (0hpa) 2	22.52		5.30333	2.53243
		C6	cox6c	Uncut (0hpa) 2	22.35		5.13333	2.84913
		C10	cox6c	24hpa 2	21.1		3.99	6.29347	6.1925
		C11	cox6c	24hpa 2	21.31		4.2	5.44094
		C12	cox6c	24hpa 2	20.96		3.85	6.93481
		A1	ef1α	Uncut (0hpa) 2	17.8	17.7967
		A2	ef1α	Uncut (0hpa) 2	17.89
		A3	ef1α	Uncut (0hpa) 2	17.7
		A7	ef1α	24hpa 2	17.16	17.14
		A8	ef1α	24hpa 2	17.12
		A9	ef1α	24hpa 2	17.14
		B1	hk2	Uncut (0hpa) 2	26.54		8.74333	0.233343	0.292638	1.01866
		B2	hk2	Uncut (0hpa) 2	26.1		8.30333	0.316554
		B3	hk2	Uncut (0hpa) 2	26		8.20333	0.339274
		B7	hk2	24hpa 2	25.51		8.37	0.302259	0.298098
		B8	hk2	24hpa 2	25.51		8.37	0.302259
		B9	hk2	24hpa 2	25.57		8.43	0.289946
		C1	aldoaa	Uncut (0hpa) 2	24.23		6.43333	1.15711	1.37604	1.09177
		C2	aldoaa	Uncut (0hpa) 2	23.62		5.82333	1.76605
		C3	aldoaa	Uncut (0hpa) 2	24.09		6.29333	1.27502
		C7	aldoaa	24hpa 2	22.95		5.81	1.78244	1.50232
		C8	aldoaa	24hpa 2	23.2		6.06	1.49885
		C9	aldoaa	24hpa 2	23.44		6.3	1.26914
		D1	gapdhs	Uncut (0hpa) 2	23.71		5.91333	1.65924	1.84957	1.87471
		D2	gapdhs	Uncut (0hpa) 2	23.45		5.65333	1.9869
		D3	gapdhs	Uncut (0hpa) 2	23.5		5.70333	1.91922
		D7	gapdhs	24hpa 2	22.06		4.92	3.30318	3.4674
		D8	gapdhs	24hpa 2	22.08		4.94	3.25771
		D9	gapdhs	24hpa 2	21.83		4.69	3.87409
		E1	pgam1B	Uncut (0hpa) 2	26.48		8.68333	0.243252	0.226438	0.83702
		E2	pgam1B	Uncut (0hpa) 2	26.57		8.77333	0.228541
		E3	pgam1B	Uncut (0hpa) 2	26.7		8.90333	0.208848
		E7	pgam1B	24hpa 2	26.16		9.02	0.192624	0.189533
		E8	pgam1B	24hpa 2	26.19		9.05	0.188659
		E9	pgam1B	24hpa 2	26.2		9.06	0.187356
		F1	eno1a	Uncut (0hpa) 2	30.77		12.9733	0.0124348	0.0135759	0.643197
		F2	eno1a	Uncut (0hpa) 2	30.57		12.7733	0.0142838
		F3	eno1a	Uncut (0hpa) 2	30.59		12.7933	0.0140871
		F7	eno1a	24hpa 2	30.55		13.41	0.0091873	0.00873197
		F8	eno1a	24hpa 2	30.77		13.63	0.0078879
		F9	eno1a	24hpa 2	30.55		13.41	0.0091873
		A4	pdha1a	Uncut (0hpa) 2	25.51		7.71333	0.476492	0.479806	1.52274
		A5	pdha1a	Uncut (0hpa) 2	25.4		7.60333	0.514243
		A6	pdha1a	Uncut (0hpa) 2	25.59		7.79333	0.450789
		A10	pdha1a	24hpa 2	24.19		7.05	0.754638	0.730618
		A11	pdha1a	24hpa 2	24.1		6.96	0.803214
		A12	pdha1a	24hpa 2	24.42		7.28	0.64343
		B4	sdhdb	Uncut (0hpa) 2	25.01		7.21333	0.673861	0.637511	2.02792
		B5	sdhdb	Uncut (0hpa) 2	25.48		7.68333	0.486504
		B6	sdhdb	Uncut (0hpa) 2	24.78		6.98333	0.790328
		B10	sdhdb	24hpa 2	22.99		5.85	1.7337	1.29282
		B11	sdhdb	24hpa 2	23.62		6.48	1.12028
		B12	sdhdb	24hpa 2	23.63		6.49	1.11254
		C4	mdh2	Uncut (0hpa) 2	21.64		3.84333	6.96693	6.68312	0.90125
		C5	mdh2	Uncut (0hpa) 2	22.03		4.23333	5.31667
		C6	mdh2	Uncut (0hpa) 2	21.43		3.63333	8.05856
		C10	mdh2	24hpa 2	21.03		3.89	6.74518	6.02317
		C11	mdh2	24hpa 2	21.11		3.97	6.38133
		C12	mdh2	24hpa 2	21.44		4.3	5.07658
		D4	ndufv2	Uncut (0hpa) 2	27.39		9.59333	0.129455	0.115331	1.77769
		D5	ndufv2	Uncut (0hpa) 2	27.57		9.77333	0.11427
		D6	ndufv2	Uncut (0hpa) 2	27.71		9.91333	0.103703
		D10	ndufv2	24hpa 2	26.04		8.9	0.209331	0.205023
		D11	ndufv2	24hpa 2	25.85		8.71	0.238797
		D12	ndufv2	24hpa 2	26.32		9.18	0.172403
		E4	coa3	Uncut (0hpa) 2	30.25		12.4533	0.0178309	0.0175854	2.95536
		E5	coa3	Uncut (0hpa) 2	30.37		12.5733	0.0164078
		E6	coa3	Uncut (0hpa) 2	30.19		12.3933	0.0185881
		E10	coa3	24hpa 2	28.3		11.16	0.0437024	0.0519712
		E11	coa3	24hpa 2	27.81		10.67	0.0613776
		E12	coa3	24hpa 2	28.04		10.9	0.0523327
		A1	ef1α	Uncut (0hpa) 2	17.47	17.3967
		A2	ef1α	Uncut (0hpa) 2	17.67
		A3	ef1α	Uncut (0hpa) 2	17.05
		A4	ef1α	24hpa 2	17.11	17.06
		A5	ef1α	24hpa 2	17.23
		A6	ef1α	24hpa 2	16.84
		B1	aco2	Uncut (0hpa) 2	24.3		6.90333	0.835391	0.812547	1.76541
		B2	aco2	Uncut (0hpa) 2	24.32		6.92333	0.82389
		B3	aco2	Uncut (0hpa) 2	24.4		7.00333	0.779447
		B4	aco2	24hpa 2	23.18		6.12	1.43779	1.43448
		B5	aco2	24hpa 2	23.25		6.19	1.3697
		B6	aco2	24hpa 2	23.12		6.06	1.49885
		E1	cs	Uncut (0hpa) 2	23.52		6.12333	1.43448	1.52681	1.08172
		E2	cs	Uncut (0hpa) 2	23.51		6.11333	1.44445
		E3	cs	Uncut (0hpa) 2	23.26		5.86333	1.71775
		E4	cs	24hpa 2	23.11		6.05	1.50928	1.65159
		E5	cs	24hpa 2	22.89		5.83	1.7579
		E6	cs	24hpa 2	22.94		5.88	1.69802
	3	A1	ef1α	Uncut (0hpa) 3	17.62	17.7533
		A2	ef1α	Uncut (0hpa) 3	17.87
		A3	ef1α	Uncut (0hpa) 3	17.77
		A7	ef1α	24hpa 3	17.03	16.99
		A8	ef1α	24hpa 3	16.95
		A9	ef1α	24hpa 3	16.99
		C1	hk1	Uncut (0hpa) 3	29.26		11.5067	0.0343675	0.0355795	2.54912
		C2	hk1	Uncut (0hpa) 3	29.15		11.3967	0.0370904
		C3	hk1	Uncut (0hpa) 3	29.22		11.4667	0.0353337
		C7	hk1	24hpa 3	27.07		10.08	0.0923884	0.0906964
		C8	hk1	24hpa 3	27.05		10.06	0.0936781
		C9	hk1	24hpa 3	27.17		10.18	0.0862015
		D1	pfkpa	Uncut (0hpa) 3	27.53		9.77667	0.114007	0.121065	3.1748
		D2	pfkpa	Uncut (0hpa) 3	27.41		9.65667	0.123895
		D3	pfkpa	Uncut (0hpa) 3	27.39		9.63667	0.125624
		D7	pfkpa	24hpa 3	25.08		8.09	0.367001	0.384358
		D8	pfkpa	24hpa 3	25.13		8.14	0.3545
		D9	pfkpa	24hpa 3	24.83		7.84	0.43644
		E1	pgam1A	Uncut (0hpa) 3	27.6		9.84667	0.108607	0.107857	4.60542
		E2	pgam1A	Uncut (0hpa) 3	27.5		9.74667	0.116402
		E3	pgam1A	Uncut (0hpa) 3	27.73		9.97667	0.0992485
		E7	pgam1A	24hpa 3	24.66		7.67	0.491021	0.496726
		E8	pgam1A	24hpa 3	24.61		7.62	0.508337
		E9	pgam1A	24hpa 3	24.66		7.67	0.491021
		F1	pkma	Uncut (0hpa) 3	25.35		7.59667	0.516625	0.571908	1.92741
		F2	pkma	Uncut (0hpa) 3	25.24		7.48667	0.557556
		F3	pkma	Uncut (0hpa) 3	25.02		7.26667	0.649405
		F7	pkma	24hpa 3	23.7		6.71	0.955188	1.1023
		F8	pkma	24hpa 3	23.54		6.55	1.06722
		F9	pkma	24hpa 3	23.24		6.25	1.3139
		G1	ldha	Uncut (0hpa) 3	28.29		10.5367	0.0673205	0.0726542	6.27667
		G2	ldha	Uncut (0hpa) 3	28.02		10.2667	0.0811756
		G3	ldha	Uncut (0hpa) 3	28.23		10.4767	0.0701793
		G7	ldha	24hpa 3	24.97		7.98	0.396078	0.456026
		G8	ldha	24hpa 3	24.71		7.72	0.474295
		G9	ldha	24hpa 3	24.62		7.63	0.504825
		H1	pdha1b	Uncut (0hpa) 3	36.01		18.2567	0.000319298	0.000327517	0.700602
		H2	pdha1b	Uncut (0hpa) 3	36.27		18.5167	0.000266642
		H3	pdha1b	Uncut (0hpa) 3	35.64		17.8867	0.000412645
		H7	pdha1b	24hpa 3	36.18		19.19	0.000167199	0.000229459
		H8	pdha1b	24hpa 3	35.1		18.11	0.000353465
		H9	pdha1b	24hpa 3	35.89		18.9	0.000204425
		A4	dlat	Uncut (0hpa) 3	25.26		7.50667	0.54988	0.504825	1.7411
		A5	dlat	Uncut (0hpa) 3	25.49		7.73667	0.468847
		A6	dlat	Uncut (0hpa) 3	25.4		7.64667	0.499027
		A10	dlat	24hpa 3	23.62		6.63	1.00965	0.878952
		A11	dlat	24hpa 3	23.7		6.71	0.955188
		A12	dlat	24hpa 3	24.14		7.15	0.704102
		B4	coa5	Uncut (0hpa) 3	29.31		11.5567	0.0331968	0.0304065	2.74473
		B5	coa5	Uncut (0hpa) 3	29.51		11.7567	0.0288995
		B6	coa5	Uncut (0hpa) 3	29.49		11.7367	0.0293029
		B10	coa5	24hpa 3	27.3		10.31	0.0787736	0.0834577
		B11	coa5	24hpa 3	27.08		10.09	0.0917503
		B12	coa5	24hpa 3	27.27		10.28	0.0804288
		C4	cox6c	Uncut (0hpa) 3	23.34		5.58667	2.08087	2.00535	2.62685
		C5	cox6c	Uncut (0hpa) 3	23.35		5.59667	2.0665
		C6	cox6c	Uncut (0hpa) 3	23.49		5.73667	1.87539
		C10	cox6c	24hpa 3	20.98		3.99	6.29347	5.26776
		C11	cox6c	24hpa 3	21.22		4.23	5.32897
		C12	cox6c	24hpa 3	21.51		4.52	4.35857
		A1	ef1α	Uncut (0hpa) 3	17.68	17.5367
		A2	ef1α	Uncut (0hpa) 3	17.1
		A3	ef1α	Uncut (0hpa) 3	17.83
		A7	ef1α	24hpa 3	17.3	16.9367
		A8	ef1α	24hpa 3	17.01
		A9	ef1α	24hpa 3	16.5
		B1	hk2	Uncut (0hpa) 3	26.75		9.21333	0.168465	0.199416	1.16743
		B2	hk2	Uncut (0hpa) 3	26.52		8.98333	0.197582
		B3	hk2	Uncut (0hpa) 3	26.25		8.71333	0.238246
		B7	hk2	24hpa 3	25.77		8.83333	0.219231	0.232804
		B8	hk2	24hpa 3	25.63		8.69333	0.241572
		B9	hk2	24hpa 3	25.65		8.71333	0.238246
		C1	aldoaa	Uncut (0hpa) 3	24.07		6.53333	1.07962	1.03804	1.42076
		C2	aldoaa	Uncut (0hpa) 3	24.09		6.55333	1.06476
		C3	aldoaa	Uncut (0hpa) 3	24.22		6.68333	0.973008
		C7	aldoaa	24hpa 3	22.91		5.97333	1.59165	1.4748
		C8	aldoaa	24hpa 3	22.84		5.90333	1.67078
		C9	aldoaa	24hpa 3	23.31		6.37333	1.20624
		D1	gapdhs	Uncut (0hpa) 3	23.75		6.21333	1.34772	1.20624	2.01391
		D2	gapdhs	Uncut (0hpa) 3	23.97		6.43333	1.15711
		D3	gapdhs	Uncut (0hpa) 3	24.01		6.47333	1.12547
		D7	gapdhs	24hpa 3	22.57		5.63333	2.01464	2.42927
		D8	gapdhs	24hpa 3	22.21		5.27333	2.58564
		D9	gapdhs	24hpa 3	22.12		5.18333	2.75208
		E1	pgam1B	Uncut (0hpa) 3	26.67		9.13333	0.178071	0.192624	1.25122
		E2	pgam1B	Uncut (0hpa) 3	26.39		8.85333	0.216213
		E3	pgam1B	Uncut (0hpa) 3	26.61		9.07333	0.185633
		E7	pgam1B	24hpa 3	25.62		8.68333	0.243252	0.241014
		E8	pgam1B	24hpa 3	25.83		8.89333	0.2103
		E9	pgam1B	24hpa 3	25.45		8.51333	0.273673
		F1	eno1a	Uncut (0hpa) 3	30.72		13.1833	0.0107503	0.013389	1.40444
		F2	eno1a	Uncut (0hpa) 3	30.16		12.6233	0.0158489
		F3	eno1a	Uncut (0hpa) 3	30.33		12.7933	0.0140871
		F7	eno1a	24hpa 3	29.58		12.6433	0.0156307	0.0188041
		F8	eno1a	24hpa 3	29.39		12.4533	0.0178309
		F9	eno1a	24hpa 3	28.97		12.0333	0.0238564
		A4	pdha1a	Uncut (0hpa) 3	25.53		7.99333	0.392434	0.379943	1.38511
		A5	pdha1a	Uncut (0hpa) 3	25.74		8.20333	0.339274
		A6	pdha1a	Uncut (0hpa) 3	25.46		7.92333	0.411945
		A10	pdha1a	24hpa 3	24.31		7.37333	0.603122	0.526263
		A11	pdha1a	24hpa 3	24.48		7.54333	0.536081
		A12	pdha1a	24hpa 3	24.73		7.79333	0.450789
		B4	sdhdb	Uncut (0hpa) 3	25.46		7.92333	0.411945	0.438462	2.68825
		B5	sdhdb	Uncut (0hpa) 3	25.37		7.83333	0.438462
		B6	sdhdb	Uncut (0hpa) 3	25.28		7.74333	0.466686
		B10	sdhdb	24hpa 3	23.49		6.55333	1.06476	1.17869
		B11	sdhdb	24hpa 3	23.05		6.11333	1.44445
		B12	sdhdb	24hpa 3	23.49		6.55333	1.06476
		C4	mdh2	Uncut (0hpa) 3	22.41		4.87333	3.41178	4.05731	1.35347
		C5	mdh2	Uncut (0hpa) 3	22.04		4.50333	4.40922
		C6	mdh2	Uncut (0hpa) 3	22.03		4.49333	4.43989
		C10	mdh2	24hpa 3	21.05		4.11333	5.77781	5.49146
		C11	mdh2	24hpa 3	21.13		4.19333	5.46614
		C12	mdh2	24hpa 3	21.19		4.25333	5.24347
		D4	ndufv2	Uncut (0hpa) 3	27.67		10.1333	0.0890354	0.071159	2.48515
		D5	ndufv2	Uncut (0hpa) 3	27.88		10.3433	0.0769744
		D6	ndufv2	Uncut (0hpa) 3	28.43		10.8933	0.0525751
		D10	ndufv2	24hpa 3	25.85		8.91333	0.207405	0.176841
		D11	ndufv2	24hpa 3	25.69		8.75333	0.231731
		D12	ndufv2	24hpa 3	26.7		9.76333	0.115065
		E4	coa3	Uncut (0hpa) 3	30.49		12.9533	0.0126083	0.0111037	4.31691
		E5	coa3	Uncut (0hpa) 3	30.79		13.2533	0.0102412
		E6	coa3	Uncut (0hpa) 3	30.74		13.2033	0.0106023
		E10	coa3	24hpa 3	27.94		11.0033	0.0487154	0.0479339
		E11	coa3	24hpa 3	27.99		11.0533	0.047056
		E12	coa3	24hpa 3	27.96		11.0233	0.0480448
		A1	ef1α	Uncut (0hpa) 3	17.73	17.6233
		A2	ef1α	Uncut (0hpa) 3	17.58
		A3	ef1α	Uncut (0hpa) 3	17.56
		A4	ef1α	24hpa 3	17.05	17.1867
		A5	ef1α	24hpa 3	17.28
		A6	ef1α	24hpa 3	17.23
		B1	aco2	Uncut (0hpa) 3	25.5		7.87667	0.425488	0.471019	3.02444
		B2	aco2	Uncut (0hpa) 3	25.4		7.77667	0.456026
		B3	aco2	Uncut (0hpa) 3	25.16		7.53667	0.538564
		B4	aco2	24hpa 3	23.05		5.86333	1.71775	1.42457
		B5	aco2	24hpa 3	23.46		6.27333	1.29282
		B6	aco2	24hpa 3	23.45		6.26333	1.30181
		E1	cs	Uncut (0hpa) 3	23.79		6.16667	1.39203	1.33532	1.4811
		E2	cs	Uncut (0hpa) 3	23.79		6.16667	1.39203
		E3	cs	Uncut (0hpa) 3	23.97		6.34667	1.22875
		E4	cs	24hpa 3	22.8		5.61333	2.04276	1.97774
		E5	cs	24hpa 3	22.86		5.67333	1.95955
		E6	cs	24hpa 3	22.88		5.69333	1.93257
	4	A1	ef1α	Uncut (0hpa) 4	17.59	17.4433
		A2	ef1α	Uncut (0hpa) 4	17.47
		A3	ef1α	Uncut (0hpa) 4	17.27
		A7	ef1α	24hpa 4	16.89	16.6567
		A8	ef1α	24hpa 4	16.48
		A9	ef1α	24hpa 4	16.6
		C1	hk1	Uncut (0hpa) 4	28.52		11.0767	0.0463011	0.0442102	1.77358
		C2	hk1	Uncut (0hpa) 4	28.38		10.9367	0.0510194
		C3	hk1	Uncut (0hpa) 4	28.86		11.4167	0.0365798
		C7	hk1	24hpa 4	27.1		10.4433	0.0718197	0.0784104
		C8	hk1	24hpa 4	27.34		10.6833	0.060813
		C9	hk1	24hpa 4	26.48		9.82333	0.110378
		D1	hk2	Uncut (0hpa) 4	25.85		8.40667	0.294674	0.327717	0.965936
		D2	hk2	Uncut (0hpa) 4	25.73		8.28667	0.320232
		D3	hk2	Uncut (0hpa) 4	25.51		8.06667	0.372985
		D7	hk2	24hpa 4	24.82		8.16333	0.348812	0.316554
		D8	hk2	24hpa 4	25.03		8.37333	0.301561
		D9	hk2	24hpa 4	25.03		8.37333	0.301561
		E1	pfkpa	Uncut (0hpa) 4	26.67		9.22667	0.166915	0.175619	3.20428
		E2	pfkpa	Uncut (0hpa) 4	26.72		9.27667	0.16123
		E3	pfkpa	Uncut (0hpa) 4	26.4		8.95667	0.201268
		E7	pfkpa	24hpa 4	24.19		7.53333	0.53981	0.562733
		E8	pfkpa	24hpa 4	24.14		7.48333	0.558846
		E9	pfkpa	24hpa 4	24.06		7.40333	0.59071
		F1	aldoaa	Uncut (0hpa) 4	23.56		6.11667	1.44112	1.28093	1.60585
		F2	aldoaa	Uncut (0hpa) 4	24.09		6.64667	0.998054
		F3	aldoaa	Uncut (0hpa) 4	23.54		6.09667	1.46124
		F7	aldoaa	24hpa 4	22.29		5.63333	2.01464	2.05697
		F8	aldoaa	24hpa 4	22.29		5.63333	2.01464
		F9	aldoaa	24hpa 4	22.2		5.54333	2.14432
		A4	gapdhs	Uncut (0hpa) 4	23.03		5.58667	2.08087	1.80733	3.72352
		A5	gapdhs	Uncut (0hpa) 4	23.42		5.97667	1.58798
		A6	gapdhs	Uncut (0hpa) 4	23.25		5.80667	1.78657
		A10	gapdhs	24hpa 4	20.65		3.99333	6.27895	6.72961
		A11	gapdhs	24hpa 4	20.15		3.49333	8.87977
		A12	gapdhs	24hpa 4	20.85		4.19333	5.46614
		B4	pgam1A	Uncut (0hpa) 4	26.16		8.71667	0.237696	0.24779	4.39745
		B5	pgam1A	Uncut (0hpa) 4	25.97		8.52667	0.271155
		B6	pgam1A	Uncut (0hpa) 4	26.17		8.72667	0.236054
		B10	pgam1A	24hpa 4	23.28		6.62333	1.01433	1.08964
		B11	pgam1A	24hpa 4	23.13		6.47333	1.12547
		B12	pgam1A	24hpa 4	23.12		6.46333	1.13329
		C4	pgam1B	Uncut (0hpa) 4	26.02		8.57667	0.261918	0.266189	1.00231
		C5	pgam1B	Uncut (0hpa) 4	26.16		8.71667	0.237696
		C6	pgam1B	Uncut (0hpa) 4	25.81		8.36667	0.302958
		C10	pgam1B	24hpa 4	25.4		8.74333	0.233343	0.266805
		C11	pgam1B	24hpa 4	25.16		8.50333	0.275576
		C12	pgam1B	24hpa 4	25.06		8.40333	0.295355
		D4	eno1a	Uncut (0hpa) 4	29.37		11.9267	0.0256871	0.0209127	2.57874
		D5	eno1a	Uncut (0hpa) 4	29.79		12.3467	0.0191992
		D6	eno1a	Uncut (0hpa) 4	29.84		12.3967	0.0185452
		D10	eno1a	24hpa 4	27.49		10.8333	0.0548077	0.0539284
		D11	eno1a	24hpa 4	27.63		10.9733	0.0497391
		D12	eno1a	24hpa 4	27.42		10.7633	0.0575326
		E4	pkma	Uncut (0hpa) 4	24.27		6.82667	0.880985	0.792156	2.57279
		E5	pkma	Uncut (0hpa) 4	24.43		6.98667	0.788504
		E6	pkma	Uncut (0hpa) 4	24.57		7.12667	0.715582
		E10	pkma	24hpa 4	22.23		5.57333	2.10019	2.03805
		E11	pkma	24hpa 4	22.3		5.64333	2.00072
		E12	pkma	24hpa 4	22.29		5.63333	2.01464
		F4	ldha	Uncut (0hpa) 4	26.1		8.65667	0.24779	0.24269	6.17597
		F5	ldha	Uncut (0hpa) 4	26.14		8.69667	0.241014
		F6	ldha	Uncut (0hpa) 4	26.15		8.70667	0.239349
		F10	ldha	24hpa 4	22.97		6.31333	1.25747	1.49885
		F11	ldha	24hpa 4	22.66		6.00333	1.55889
		F12	ldha	24hpa 4	22.52		5.86333	1.71775
		A1	ef1α	Uncut (0hpa) 4	17.22	17.13
		A2	ef1α	Uncut (0hpa) 4	17.11
		A3	ef1α	Uncut (0hpa) 4	17.06
		A7	ef1α	24hpa 4	16.84	16.7433
		A8	ef1α	24hpa 4	16.53
		A9	ef1α	24hpa 4	16.86
		B1	Pdha1a	Uncut (0hpa) 4	24.54		7.41	0.587987	0.605916	0.856584
		B2	Pdha1a	Uncut (0hpa) 4	24.53		7.4	0.592077
		B3	Pdha1a	Uncut (0hpa) 4	24.42		7.29	0.638986
		B7	Pdha1a	24hpa 4	24.43		7.68667	0.485381	0.519018
		B8	Pdha1a	24hpa 4	24.35		7.60667	0.513056
		B9	Pdha1a	24hpa 4	24.22		7.47667	0.561434
		C1	Pdha1b	Uncut (0hpa) 4	34.87		17.74	0.000456802	0.000606946	0.130308
		C2	Pdha1b	Uncut (0hpa) 4	34.12		16.99	0.000768246
		C3	Pdha1b	Uncut (0hpa) 4	34.39		17.26	0.000637122
		C7	Pdha1b	24hpa 4	36.95		20.2067	8.26394e-05	7.90901e-05
		C8	Pdha1b	24hpa 4	37.24		20.4967	6.75909e-05
		C9	Pdha1b	24hpa 4	36.85		20.1067	8.85707e-05
		D1	dlat	Uncut (0hpa) 4	24.01		6.88	0.849012	0.899496	1.14605
		D2	dlat	Uncut (0hpa) 4	23.87		6.74	0.93553
		D3	dlat	Uncut (0hpa) 4	23.9		6.77	0.916277
		D7	dlat	24hpa 4	23.35		6.60667	1.02611	1.03087
		D8	dlat	24hpa 4	23.3		6.55667	1.0623
		D9	dlat	24hpa 4	23.38		6.63667	1.005
		E1	cs	Uncut (0hpa) 4	23.09		5.96	1.60643	1.62885	1.08423
		E2	cs	Uncut (0hpa) 4	23.05		5.92	1.65159
		E3	cs	Uncut (0hpa) 4	23.07		5.94	1.62885
		E7	cs	24hpa 4	22.64		5.89667	1.67852	1.76605
		E8	cs	24hpa 4	22.49		5.74667	1.86243
		E9	cs	24hpa 4	22.57		5.82667	1.76197
		F1	aco2	Uncut (0hpa) 4	23.97		6.84	0.872881	0.905753	2.25012
		F2	aco2	Uncut (0hpa) 4	23.84		6.71	0.955188
		F3	aco2	Uncut (0hpa) 4	23.94		6.81	0.891222
		F7	aco2	24hpa 4	22.36		5.61667	2.03805	2.03805
		F8	aco2	24hpa 4	22.52		5.77667	1.82411
		F9	aco2	24hpa 4	22.2		5.45667	2.27709
		A4	sdhdb	Uncut (0hpa) 4	24.28		7.15	0.704102	0.67542	1.87038
		A5	sdhdb	Uncut (0hpa) 4	24.35		7.22	0.670754
		A6	sdhdb	Uncut (0hpa) 4	24.39		7.26	0.652412
		A10	sdhdb	24hpa 4	22.94		6.19667	1.36338	1.26329
		A11	sdhdb	24hpa 4	23.19		6.44667	1.14646
		A12	sdhdb	24hpa 4	23.02		6.27667	1.28984
		B4	mdh2	Uncut (0hpa) 4	21.18		4.05	6.0371	6.56073	0.773782
		B5	mdh2	Uncut (0hpa) 4	20.83		3.7	7.69465
		B6	mdh2	Uncut (0hpa) 4	21.17		4.04	6.07909
		B10	mdh2	24hpa 4	21.19		4.44667	4.58585	5.07658
		B11	mdh2	24hpa 4	21.02		4.27667	5.15935
		B12	mdh2	24hpa 4	20.92		4.17667	5.52966
		C4	ndufv2	Uncut (0hpa) 4	25.64		8.51	0.274306	0.24269	0.649169
		C5	ndufv2	Uncut (0hpa) 4	25.8		8.67	0.24551
		C6	ndufv2	Uncut (0hpa) 4	26.01		8.88	0.212253
		C10	ndufv2	24hpa 4	25.94		9.19667	0.170423	0.157547
		C11	ndufv2	24hpa 4	25.96		9.21667	0.168076
		C12	ndufv2	24hpa 4	26.26		9.51667	0.136521
		D4	coa3	Uncut (0hpa) 4	28.84		11.71	0.0298496	0.0289664	1.64718
		D5	coa3	Uncut (0hpa) 4	29.08		11.95	0.025275
		D6	coa3	Uncut (0hpa) 4	28.73		11.6	0.0322145
		D10	coa3	24hpa 4	27.59		10.8467	0.0543035	0.0477129
		D11	coa3	24hpa 4	27.63		10.8867	0.0528186
		D12	coa3	24hpa 4	28.11		11.3667	0.0378697
		E4	coa5	Uncut (0hpa) 4	28.42		11.29	0.0399366	0.0435009	2.07053
		E5	coa5	Uncut (0hpa) 4	28.21		11.08	0.0461942
		E6	coa5	Uncut (0hpa) 4	28.26		11.13	0.0446207
		E10	coa5	24hpa 4	26.77		10.0267	0.0958678	0.0900699
		E11	coa5	24hpa 4	26.77		10.0267	0.0958678
		E12	coa5	24hpa 4	27.04		10.2967	0.079505
		F4	cox6c	Uncut (0hpa) 4	21.52		4.39	4.76956	4.49148	1.95884
		F5	cox6c	Uncut (0hpa) 4	21.38		4.25	5.2556
		F6	cox6c	Uncut (0hpa) 4	21.92		4.79	3.61465
		F10	cox6c	24hpa 4	20.46		3.71667	7.60627	8.79808
		F11	cox6c	24hpa 4	19.97		3.22667	10.6826
		F12	cox6c	24hpa 4	20.32		3.57667	8.38139

## Sheet: Fig2E
												Summary of Fold Changes
Metabolite	Biological Replicate	Metabolite name	Sample name	Metabolite area	Metabolite area/AABA area	geoMean	Relative Fold Change
Glucose	1	AABA	Uncut (0hpa) 1	1.28469e+10
		AABA	Uncut (0hpa) 1	1.27031e+10								6hpa VS Uncut (0hpa)						24hpa VS Uncut (0hpa)
		AABA	Uncut (0hpa) 1	1.13297e+10
		Glucose	Uncut (0hpa) 1	3.645e+07	0.00283726	0.00289038	3.57887					Glucose						Glucose
		Glucose	Uncut (0hpa) 1	3.50531e+07	0.00275941								Uncut (0hpa)	6hpa	Fold Change				Uncut (0hpa)	24hpa	Fold Change
		Glucose	Uncut (0hpa) 1	3.49437e+07	0.00308426							Biological Rep 1	0.00289038	0.0103443	3.57887			Biological Rep 1	0.0048439	0.0186403	3.84821
		AABA	6hpa 1	2.01573e+10								Biological Rep 2	0.00221278	0.0130645	5.9041			Biological Rep 2	0.00327886	0.0131408	4.00773
		AABA	6hpa 1	1.96484e+10								Biological Rep 3	0.00258942	0.00848482	3.27673			Biological Rep 3	0.00389802	0.00838086	2.15003
		AABA	6hpa 1	2.26503e+10								Biological Rep 4	0.00208809	0.00921994	4.41549			Biological Rep 4	0.00302881	0.0170663	5.63466
		Glucose	6hpa 1	2.16455e+08	0.0107383	0.0103443
		Glucose	6hpa 1	2.05959e+08	0.0104823							Lactate						Lactate
		Glucose	6hpa 1	2.22734e+08	0.00983362								Uncut (0hpa)	6hpa	Fold Change				Uncut (0hpa)	24hpa	Fold Change
		AABA	Uncut (0hpa) 1	4155126643								Biological Rep 1	0.0189712	0.0369928	1.94994			Biological Rep 1	0.0100452	0.0305431	3.04057
		AABA	Uncut (0hpa) 1	4695739762								Biological Rep 2	0.0241096	0.0365309	1.5152			Biological Rep 2	0.00901973	0.0269681	2.9899
		AABA	Uncut (0hpa) 1	4799205426								Biological Rep 3	0.0197565	0.0331646	1.67867			Biological Rep 3	0.0100025	0.0216148	2.16094
		Glucose	Uncut (0hpa) 1	21433009	0.00515821	0.0048439	3.84821					Biological Rep 4	0.0146203	0.0311424	2.13008			Biological Rep 4	0.00848522	0.0294506	3.4708
		Glucose	Uncut (0hpa) 1	22511205	0.00479396
		Glucose	Uncut (0hpa) 1	22057809	0.00459614							Glutamine						Glutamine
		AABA	24hpa 1	2916274478									Uncut (0hpa)	6hpa	Fold Change				Uncut (0hpa)	24hpa	Fold Change
		AABA	24hpa 1	2687684517								Biological Rep 1	0.0171412	0.0250232	1.45983			Biological Rep 1	0.00749033	0.940429	125.552
		AABA	24hpa 1	2467192422								Biological Rep 2	0.00884684	0.0151449	1.7119			Biological Rep 2	0.0103941	0.930609	89.532
		Glucose	24hpa 1	49094364	0.0168346	0.0186403						Biological Rep 3	0.00677931	0.00986081	1.45454			Biological Rep 3	0.00733461	0.932202	127.096
		Glucose	24hpa 1	49063525	0.0182549							Biological Rep 4	0.00500479	0.00860912	1.72018			Biological Rep 4	0.0156084	0.92563	59.3033
		Glucose	24hpa 1	51997336	0.0210755
	2	AABA	Uncut (0hpa) 2	1.37511e+10								Glutamate						Glutamate
		AABA	Uncut (0hpa) 2	1.48474e+10									Uncut (0hpa)	6hpa	Fold Change				Uncut (0hpa)	24hpa	Fold Change
		AABA	Uncut (0hpa) 2	1.24765e+10								Biological Rep 1	0.0722784	0.146094	2.02127			Biological Rep 1	0.00499922	1.88281	376.621
		Glucose	Uncut (0hpa) 2	3.24069e+07	0.00235668	0.00221278	5.9041					Biological Rep 2	0.0400045	0.0707803	1.76931			Biological Rep 2	0.00602574	2.25409	374.077
		Glucose	Uncut (0hpa) 2	2.89293e+07	0.00194844							Biological Rep 3	0.040485	0.0697835	1.72369			Biological Rep 3	0.00745384	2.4185	324.464
		Glucose	Uncut (0hpa) 2	2.94389e+07	0.00235956							Biological Rep 4	0.0278758	0.0474978	1.70391			Biological Rep 4	0.011433	3.25196	284.436
		AABA	6hpa 2	1.79521e+10
		AABA	6hpa 2	1.79214e+10
		AABA	6hpa 2	1.68598e+10
		Glucose	6hpa 2	2.39718e+08	0.0133532	0.0130645
		Glucose	6hpa 2	2.30498e+08	0.0128616
		Glucose	6hpa 2	2.18902e+08	0.0129837
		AABA	Uncut (0hpa) 2	2669406810
		AABA	Uncut (0hpa) 2	3500873086
		AABA	Uncut (0hpa) 2	3278470742
		Glucose	Uncut (0hpa) 2	10066187	0.00377095	0.00327886	4.00773
		Glucose	Uncut (0hpa) 2	10528581	0.00300742
		Glucose	Uncut (0hpa) 2	10190546	0.00310832
		AABA	24hpa 2	3465326540
		AABA	24hpa 2	4297806763
		AABA	24hpa 2	3836380115
		Glucose	24hpa 2	49636859	0.0143239	0.0131408
		Glucose	24hpa 2	49778751	0.0115824
		Glucose	24hpa 2	52472435	0.0136776
	3	AABA	Uncut (0hpa) 3	1.45905e+10
		AABA	Uncut (0hpa) 3	1.58888e+10
		AABA	Uncut (0hpa) 3	1.41949e+10
		Glucose	Uncut (0hpa) 3	4.13475e+07	0.00283387	0.00258942	3.27673
		Glucose	Uncut (0hpa) 3	3.86901e+07	0.00243505
		Glucose	Uncut (0hpa) 3	3.57151e+07	0.00251605
		AABA	6hpa 3	1.3626e+10
		AABA	6hpa 3	1.39166e+10
		AABA	6hpa 3	1.35557e+10
		Glucose	6hpa 3	1.26976e+08	0.00931868	0.00848482
		Glucose	6hpa 3	1.2205e+08	0.00877009
		Glucose	6hpa 3	1.01319e+08	0.00747427
		AABA	Uncut (0hpa) 3	3653041723
		AABA	Uncut (0hpa) 3	2870997039
		AABA	Uncut (0hpa) 3	2636241632
		Glucose	Uncut (0hpa) 3	12227397	0.00334718	0.00389802	2.15003
		Glucose	Uncut (0hpa) 3	11331512	0.00394689
		Glucose	Uncut (0hpa) 3	11819068	0.0044833
		AABA	24hpa 3	5077625209
		AABA	24hpa 3	3846822948
		AABA	24hpa 3	5505239892
		Glucose	24hpa 3	40884387	0.00805187	0.00838086
		Glucose	24hpa 3	39151751	0.0101777
		Glucose	24hpa 3	39545440	0.00718324
	4	AABA	Uncut (0hpa) 4	1.45897e+10
		AABA	Uncut (0hpa) 4	1.26766e+10
		AABA	Uncut (0hpa) 4	1.44526e+10
		Glucose	Uncut (0hpa) 4	2.92695e+07	0.00200617	0.00208809	4.41549
		Glucose	Uncut (0hpa) 4	2.80141e+07	0.00220991
		Glucose	Uncut (0hpa) 4	2.96793e+07	0.00205355
		AABA	6hpa 4	1.39623e+10
		AABA	6hpa 4	1.37395e+10
		AABA	6hpa 4	1.32413e+10
		Glucose	6hpa 4	1.27814e+08	0.00915424	0.00921994
		Glucose	6hpa 4	1.23536e+08	0.00899131
		Glucose	6hpa 4	1.26087e+08	0.00952224
		AABA	Uncut (0hpa) 4	4161855361
		AABA	Uncut (0hpa) 4	4788854573
		AABA	Uncut (0hpa) 4	5505268889
		Glucose	Uncut (0hpa) 4	15152850	0.00364089	0.00302881	5.63466
		Glucose	Uncut (0hpa) 4	15207514	0.00317561
		Glucose	Uncut (0hpa) 4	13230091	0.00240317
		AABA	24hpa 4	2447760778
		AABA	24hpa 4	2376617805
		AABA	24hpa 4	2823806152
		Glucose	24hpa 4	44835484	0.0183169	0.0170663
		Glucose	24hpa 4	43138533	0.0181512
		Glucose	24hpa 4	42217962	0.0149507
Lactate	1	AABA	Uncut (0hpa) 1	3.0722e+09
		AABA	Uncut (0hpa) 1	2.98864e+09
		AABA	Uncut (0hpa) 1	2.93029e+09
		lactate	Uncut (0hpa) 1	5.18844e+07	0.0168883	0.0189712	1.94994
		lactate	Uncut (0hpa) 1	6.32728e+07	0.0211711
		lactate	Uncut (0hpa) 1	5.59585e+07	0.0190966
		AABA	6hpa 1	3.11921e+09
		AABA	6hpa 1	3.20801e+09
		AABA	6hpa 1	3.09508e+09
		lactate	6hpa 1	1.12658e+08	0.0361175	0.0369928
		lactate	6hpa 1	1.13511e+08	0.0353837
		lactate	6hpa 1	1.22603e+08	0.0396123
		AABA	Uncut (0hpa) 1	4618945145
		AABA	Uncut (0hpa) 1	4698234393
		AABA	Uncut (0hpa) 1	4702049185
		lactate	Uncut (0hpa) 1	46230622	0.0100089	0.0100452	3.04057
		lactate	Uncut (0hpa) 1	44114523	0.0093896
		lactate	Uncut (0hpa) 1	50713768	0.0107855
		AABA	24hpa 1	4087528611
		AABA	24hpa 1	4135509509
		AABA	24hpa 1	4116866492
		lactate	24hpa 1	125992723	0.0308237	0.0305431
		lactate	24hpa 1	120584805	0.0291584
		lactate	24hpa 1	130514132	0.0317023
	2	AABA	Uncut (0hpa) 2	2.88509e+09
		AABA	Uncut (0hpa) 2	2.85963e+09
		AABA	Uncut (0hpa) 2	2.84116e+09
		lactate	Uncut (0hpa) 2	6.27322e+07	0.0217436	0.0241096	1.5152
		lactate	Uncut (0hpa) 2	6.83774e+07	0.0239113
		lactate	Uncut (0hpa) 2	7.65829e+07	0.0269548
		AABA	6hpa 2	3.23589e+09
		AABA	6hpa 2	3.32133e+09
		AABA	6hpa 2	3.24266e+09
		lactate	6hpa 2	1.19696e+08	0.0369901	0.0365309
		lactate	6hpa 2	1.20962e+08	0.0364198
		lactate	6hpa 2	1.17343e+08	0.0361874
		AABA	Uncut (0hpa) 2	4635727574
		AABA	Uncut (0hpa) 2	4630645157
		AABA	Uncut (0hpa) 2	4675315684
		lactate	Uncut (0hpa) 2	37115531	0.00800641	0.00901973	2.9899
		lactate	Uncut (0hpa) 2	45084710	0.00973616
		lactate	Uncut (0hpa) 2	44011548	0.0094136
		AABA	24hpa 2	4732564750
		AABA	24hpa 2	4802701082
		AABA	24hpa 2	4765989737
		lactate	24hpa 2	119845685	0.0253236	0.0269681
		lactate	24hpa 2	134543328	0.0280141
		lactate	24hpa 2	131765139	0.027647
	3	AABA	Uncut (0hpa) 3	2.98444e+09
		AABA	Uncut (0hpa) 3	3.00747e+09
		AABA	Uncut (0hpa) 3	2.95328e+09
		lactate	Uncut (0hpa) 3	5.80558e+07	0.0194528	0.0197565	1.67867
		lactate	Uncut (0hpa) 3	5.82596e+07	0.0193716
		lactate	Uncut (0hpa) 3	6.04346e+07	0.0204635
		AABA	6hpa 3	3.06463e+09
		AABA	6hpa 3	3.12425e+09
		AABA	6hpa 3	3.07363e+09
		lactate	6hpa 3	1.00216e+08	0.0327007	0.0331646
		lactate	6hpa 3	9.58531e+07	0.0306804
		lactate	6hpa 3	1.11752e+08	0.0363584
		AABA	Uncut (0hpa) 3	5020432846
		AABA	Uncut (0hpa) 3	4902534866
		AABA	Uncut (0hpa) 3	4909598632
		lactate	Uncut (0hpa) 3	48052510	0.00957139	0.0100025	2.16094
		lactate	Uncut (0hpa) 3	48275886	0.00984713
		lactate	Uncut (0hpa) 3	52129855	0.0106179
		AABA	24hpa 3	4949301719
		AABA	24hpa 3	4908543459
		AABA	24hpa 3	4905368120
		lactate	24hpa 3	112253167	0.0226806	0.0216148
		lactate	24hpa 3	104193648	0.021227
		lactate	24hpa 3	102891933	0.0209754
	4	AABA	Uncut (0hpa) 4	2.9664e+09
		AABA	Uncut (0hpa) 4	2.9054e+09
		AABA	Uncut (0hpa) 4	2.84934e+09
		lactate	Uncut (0hpa) 4	3.89775e+07	0.0131397	0.0146203	2.13008
		lactate	Uncut (0hpa) 4	4.54574e+07	0.0156458
		lactate	Uncut (0hpa) 4	4.33144e+07	0.0152015
		AABA	6hpa 4	3.39569e+09
		AABA	6hpa 4	3.40267e+09
		AABA	6hpa 4	3.40765e+09
		lactate	6hpa 4	1.0243e+08	0.0301646	0.0311424
		lactate	6hpa 4	1.04026e+08	0.030572
		lactate	6hpa 4	1.11607e+08	0.0327518
		AABA	Uncut (0hpa) 4	5077519573
		AABA	Uncut (0hpa) 4	5177137880
		AABA	Uncut (0hpa) 4	5179826933
		lactate	Uncut (0hpa) 4	46958526	0.00924832	0.00848522	3.4708
		lactate	Uncut (0hpa) 4	36096984	0.00697238
		lactate	Uncut (0hpa) 4	49075085	0.00947427
		AABA	24hpa 4	4672698274
		AABA	24hpa 4	4737299222
		AABA	24hpa 4	4676893489
		lactate	24hpa 4	135680370	0.0290368	0.0294506
		lactate	24hpa 4	141656618	0.0299024
		lactate	24hpa 4	137588636	0.0294188
Glutamine	1	AABA	Uncut (0hpa) 1	5.49326e+09
		AABA	Uncut (0hpa) 1	5.69613e+09
		AABA	Uncut (0hpa) 1	5.00263e+09
		glutamine	Uncut (0hpa) 1	9.13425e+07	0.0166281	0.0171412	1.45983
		glutamine	Uncut (0hpa) 1	9.43056e+07	0.0165561
		glutamine	Uncut (0hpa) 1	9.15211e+07	0.0182946
		AABA	6hpa 1	4.89054e+09
		AABA	6hpa 1	4.85612e+09
		AABA	6hpa 1	4.83696e+09
		glutamine	6hpa 1	1.18201e+08	0.0241692	0.0250232
		glutamine	6hpa 1	1.18297e+08	0.0243603
		glutamine	6hpa 1	1.28722e+08	0.0266123
		AABA	Uncut (0hpa) 1	5631168724
		AABA	Uncut (0hpa) 1	5597630122
		AABA	Uncut (0hpa) 1	5619438648
		glutamine	Uncut (0hpa) 1	41623641	0.00739165	0.00748999	125.558
		glutamine	Uncut (0hpa) 1	42303556	0.0075574
		glutamine	Uncut (0hpa) 1	42269010	0.00752193
		AABA	24hpa 1	179358087
		AABA	24hpa 1	182210615
		AABA	24hpa 1	183089148
		glutamine	24hpa 1	168728940	0.940738	0.940429
		glutamine	24hpa 1	171375294	0.940534
		glutamine	24hpa 1	172106510	0.940015
	2	AABA	Uncut (0hpa) 2	4.6352e+09
		AABA	Uncut (0hpa) 2	4.78383e+09
		AABA	Uncut (0hpa) 2	4.69532e+09
		glutamine	Uncut (0hpa) 2	3.96261e+07	0.00854896	0.00884684	1.7119
		glutamine	Uncut (0hpa) 2	4.0595e+07	0.00848588
		glutamine	Uncut (0hpa) 2	4.48146e+07	0.00954452
		AABA	6hpa 2	5.18991e+09
		AABA	6hpa 2	5.0411e+09
		AABA	6hpa 2	5.28803e+09
		glutamine	6hpa 2	7.58104e+07	0.0146072	0.0151449
		glutamine	6hpa 2	7.84304e+07	0.0155582
		glutamine	6hpa 2	8.08293e+07	0.0152853
		AABA	Uncut (0hpa) 2	5698673567
		AABA	Uncut (0hpa) 2	5732741105
		AABA	Uncut (0hpa) 2	5695206071
		glutamine	Uncut (0hpa) 2	59011551	0.0103553	0.0103941	89.5323
		glutamine	Uncut (0hpa) 2	59697445	0.0104134
		glutamine	Uncut (0hpa) 2	59308127	0.0104137
		AABA	24hpa 2	172924647
		AABA	24hpa 2	172937805
		AABA	24hpa 2	175296178
		glutamine	24hpa 2	160974410	0.930893	0.930609
		glutamine	24hpa 2	160976343	0.930834
		glutamine	24hpa 2	163042737	0.930099
	3	AABA	Uncut (0hpa) 3	5.66359e+09
		AABA	Uncut (0hpa) 3	6.0363e+09
		AABA	Uncut (0hpa) 3	6.18511e+09
		glutamine	Uncut (0hpa) 3	3.95512e+07	0.00698342	0.00677931	1.45454
		glutamine	Uncut (0hpa) 3	3.9702e+07	0.00657721
		glutamine	Uncut (0hpa) 3	4.19559e+07	0.00678338
		AABA	6hpa 3	5.97696e+09
		AABA	6hpa 3	5.78772e+09
		AABA	6hpa 3	5.9734e+09
		glutamine	6hpa 3	5.55585e+07	0.00929543	0.00986081
		glutamine	6hpa 3	6.20298e+07	0.0107175
		glutamine	6hpa 3	5.74906e+07	0.00962443
		AABA	Uncut (0hpa) 3	5875041653
		AABA	Uncut (0hpa) 3	5847765077
		AABA	Uncut (0hpa) 3	5838369650
		glutamine	Uncut (0hpa) 3	42452575	0.00722592	0.00733419	127.104
		glutamine	Uncut (0hpa) 3	43307154	0.00740576
		glutamine	Uncut (0hpa) 3	43041258	0.00737214
		AABA	24hpa 3	159712048
		AABA	24hpa 3	162195988
		AABA	24hpa 3	164253775
		glutamine	24hpa 3	148759857	0.931425	0.932202
		glutamine	24hpa 3	151255809	0.93255
		glutamine	24hpa 3	153188201	0.932631
	4	AABA	Uncut (0hpa) 4	5.37905e+09
		AABA	Uncut (0hpa) 4	5.04923e+09
		AABA	Uncut (0hpa) 4	4.98653e+09
		glutamine	Uncut (0hpa) 4	2.4322e+07	0.00452162	0.00500479	1.72018
		glutamine	Uncut (0hpa) 4	2.65072e+07	0.00524974
		glutamine	Uncut (0hpa) 4	2.63344e+07	0.0052811
		AABA	6hpa 4	5.84009e+09
		AABA	6hpa 4	5.84543e+09
		AABA	6hpa 4	5.96243e+09
		glutamine	6hpa 4	5.26163e+07	0.00900951	0.00860912
		glutamine	6hpa 4	4.95542e+07	0.00847743
		glutamine	6hpa 4	4.9812e+07	0.00835431
		AABA	Uncut (0hpa) 4	5911958258
		AABA	Uncut (0hpa) 4	5938949858
		AABA	Uncut (0hpa) 4	5945742594
		glutamine	Uncut (0hpa) 4	93552536	0.0158243	0.0156076	59.3028
		glutamine	Uncut (0hpa) 4	92340810	0.0155483
		glutamine	Uncut (0hpa) 4	91877112	0.0154526
		AABA	24hpa 4	201378938
		AABA	24hpa 4	199831036
		AABA	24hpa 4	191741891
		glutamine	24hpa 4	187779489	0.932468	0.925576
		glutamine	24hpa 4	186413236	0.932854
		glutamine	6hpa 4	174785378	0.911566
Glutamate	1	AABA	Uncut (0hpa) 1	5.49326e+09
		AABA	Uncut (0hpa) 1	5.69613e+09
		AABA	Uncut (0hpa) 1	5.00263e+09
		glutamate	Uncut (0hpa) 1	3.53018e+08	0.0642638	0.0722784	2.02127
		glutamate	Uncut (0hpa) 1	4.01515e+08	0.0704892
		glutamate	Uncut (0hpa) 1	4.17e+08	0.0833561
		AABA	6hpa 1	4.89054e+09
		AABA	6hpa 1	4.85612e+09
		AABA	6hpa 1	4.83696e+09
		glutamate	6hpa 1	6.72881e+08	0.137588	0.146094
		glutamate	6hpa 1	7.26045e+08	0.149511
		glutamate	6hpa 1	7.33188e+08	0.15158
		AABA	Uncut (0hpa) 1	5631168724
		AABA	Uncut (0hpa) 1	5597630122
		AABA	Uncut (0hpa) 1	5619438648
		glutamate	Uncut (0hpa) 1	24556532	0.00436082	0.00499922	376.621
		glutamate	Uncut (0hpa) 1	29236420	0.005223
		glutamate	Uncut (0hpa) 1	30825518	0.00548552
		AABA	24hpa 1	179358087
		AABA	24hpa 1	182210615
		AABA	24hpa 1	183089148
		glutamate	24hpa 1	338105993	1.88509	1.88281
		glutamate	24hpa 1	336593384	1.84728
		glutamate	24hpa 1	350929242	1.91671
	2	AABA	Uncut (0hpa) 2	4.6352e+09
		AABA	Uncut (0hpa) 2	4.78383e+09
		AABA	Uncut (0hpa) 2	4.69532e+09
		glutamate	Uncut (0hpa) 2	1.79729e+08	0.0387749	0.0400045	1.76931
		glutamate	Uncut (0hpa) 2	1.90515e+08	0.0398247
		glutamate	Uncut (0hpa) 2	1.94665e+08	0.0414594
		AABA	6hpa 2	5.18991e+09
		AABA	6hpa 2	5.0411e+09
		AABA	6hpa 2	5.28803e+09
		glutamate	6hpa 2	3.56763e+08	0.0687417	0.0707803
		glutamate	6hpa 2	3.67876e+08	0.0729753
		glutamate	6hpa 2	3.73797e+08	0.0706874
		AABA	Uncut (0hpa) 2	5698673567
		AABA	Uncut (0hpa) 2	5732741105
		AABA	Uncut (0hpa) 2	5695206071
		glutamate	Uncut (0hpa) 2	33235683	0.00583218	0.00602574	374.077
		glutamate	Uncut (0hpa) 2	34552378	0.0060272
		glutamate	Uncut (0hpa) 2	35448243	0.00622422
		AABA	24hpa 2	172924647
		AABA	24hpa 2	172937805
		AABA	24hpa 2	175296178
		glutamate	24hpa 2	365357739	2.11281	2.25409
		glutamate	24hpa 2	401100134	2.31933
		glutamate	24hpa 2	409698521	2.33718
	3	AABA	Uncut (0hpa) 3	5.66359e+09
		AABA	Uncut (0hpa) 3	6.0363e+09
		AABA	Uncut (0hpa) 3	6.18511e+09
		glutamate	Uncut (0hpa) 3	2.25727e+08	0.0398558	0.040485	1.72369
		glutamate	Uncut (0hpa) 3	2.42325e+08	0.0401447
		glutamate	Uncut (0hpa) 3	2.56513e+08	0.0414727
		AABA	6hpa 3	5.97696e+09
		AABA	6hpa 3	5.78772e+09
		AABA	6hpa 3	5.9734e+09
		glutamate	6hpa 3	4.00817e+08	0.0670603	0.0697835
		glutamate	6hpa 3	4.18045e+08	0.0722297
		glutamate	6hpa 3	4.19083e+08	0.0701582
		AABA	Uncut (0hpa) 3	5875041653
		AABA	Uncut (0hpa) 3	5847765077
		AABA	Uncut (0hpa) 3	5838369650
		glutamate	Uncut (0hpa) 3	41079349	0.00699218	0.00745384	324.464
		glutamate	Uncut (0hpa) 3	44955150	0.00768758
		glutamate	Uncut (0hpa) 3	44981116	0.0077044
		AABA	24hpa 3	159712048
		AABA	24hpa 3	162195988
		AABA	24hpa 3	164253775
		glutamate	24hpa 3	369928907	2.31622	2.4185
		glutamate	24hpa 3	378184724	2.33165
		glutamate	24hpa 3	430240644	2.61937
	4	AABA	Uncut (0hpa) 4	5.37905e+09
		AABA	Uncut (0hpa) 4	5.04923e+09
		AABA	Uncut (0hpa) 4	4.98653e+09
		glutamate	Uncut (0hpa) 4	1.43065e+08	0.0265967	0.0278758	1.70391
		glutamate	Uncut (0hpa) 4	1.45404e+08	0.0287973
		glutamate	Uncut (0hpa) 4	1.41027e+08	0.0282816
		AABA	6hpa 4	5.84009e+09
		AABA	6hpa 4	5.84543e+09
		AABA	6hpa 4	5.96243e+09
		glutamate	6hpa 4	2.728e+08	0.0467116	0.0474978
		glutamate	6hpa 4	2.79319e+08	0.0477841
		glutamate	6hpa 4	2.86244e+08	0.048008
		AABA	Uncut (0hpa) 4	5911958258
		AABA	Uncut (0hpa) 4	5938949858
		AABA	Uncut (0hpa) 4	5945742594
		glutamate	Uncut (0hpa) 4	63707086	0.010776	0.011433	284.436
		glutamate	Uncut (0hpa) 4	68793100	0.0115834
		glutamate	Uncut (0hpa) 4	71186580	0.0119727
		AABA	24hpa 4	201378938
		AABA	24hpa 4	199831036
		AABA	24hpa 4	191741891
		glutamate	24hpa 4	615580243	3.05683	3.25196
		glutamate	24hpa 4	645619099	3.23082
		glutamate	24hpa 4	667681505	3.48219

## Sheet: Fig2N
		250
		251
			Fluorescence intencity of 2NBDG in each bony-ray
Condition	Fish number	X coordinate	Bony-rays from top to bottom (individual units)
			1	2	3	4	5	6	7	8	9	10	11	12	13	14	15	16	17	18	Fig2N 0hpa Column
0 hpa	P2	Average 0-250 um (A)	1859.09	2859.7	3289.69	2873.06	1901.79	1721.42	2575.54	2503.53	1449.34	1377.64	2437.47	2638.81	2638.16	1344.19	2827.79	3150.76	2419.72	1859.09
		Average 250-500 (B)	1861.97	2349.28	2317.05	2251.91	2207.28	2230.63	2272.59	2244.48	2217.97	2303.27	2418.44	2415.24	2376.97	2323.83	2568.46	2480.59	2142.92	1861.97
			0.998457	1.21727	1.41977	1.27583	0.861595	0.771718	1.1333	1.11542	0.653453	0.598121	1.00787	1.09257	1.10988	0.578436	1.10097	1.27017	1.12917	0.998457
	P1	Average 0-250 um (A)	722.531	909.837	1021.06	640.433	709.354	991.306	795.086	590.23	680.406	979.773	1033.26	834.897	673.465	1085.25	863.716	687.516
		Average 250-500 um (B)	782.985	1049.12	845.486	579.935	905.452	1159.73	828.109	566.891	817.761	1161.02	1266.62	988.262	638.34	886.035	1007.32	930.367
			0.922791	0.867236	1.20766	1.10432	0.783425	0.854773	0.960122	1.04117	0.832036	0.843887	0.815764	0.844813	1.05503	1.22483	0.857436	0.738973
	P3	Average 0-250 um(A)	2861.06	2303.21	2287.35	1262.37	1151.4	1716.62	1490.06	869.214	1096.79	1501.3	1590.44	1221.61	1097.92	1993.01	1448.25	1685.72
		Average 250-500 um (B)	2832.26	2719.91	2081.35	1425.59	1936.48	2126.75	1938.64	1065.13	1737.34	2065.77	1861.61	1516.43	1258.44	1825.58	1834.92	1979.54
			1.01017	0.846798	1.09897	0.88551	0.594582	0.807155	0.768613	0.816068	0.631304	0.726747	0.854335	0.805587	0.872449	1.09172	0.789273	0.851575
			Fluorescence intencity of of 2NBDG in each bony-ray
Condition	Fish number	X coordinate	Bony-rays from top to bottom (individual units)
			1	2	3	4	5	6	7	8	9	10	11	12	13	14	15	16	17		Fig2N 24hpa Column
24hpa	P1	Average 0-250 um (A)	2796.88	3479.59	3146.07	2640.43	1675.65	1634.53	2846.29	2891.61	1589.59	3288.1	3488.01	1857.69	1976.63	3664.43	3965.96	3779.26	2862.69
		Average 250-500 um (B)	2305.17	3559.62	3287.4	1770.94	1293.7	1901.86	2526.73	2124.96	1317.54	2756.52	3483.55	2362.64	1579.21	2931.67	4516.95	4018.53	2513.69
			1.21331	0.977515	0.95701	1.49097	1.29524	0.859434	1.12647	1.36079	1.20648	1.19284	1.00128	0.786275	1.25166	1.24995	0.878017	0.940457	1.13884
	P1	Average 0-250 um (A)	4500.71	4396.34	3919.83	2449.47	2857.53	3564.86	3193.64	2645.56	1989.28	3074.92	3106.06	2762.63	2084.39	2967.8	4227.9	4714.94	3592.04
		Average 250-500 um (B)	4857.78	4583.15	3460.41	2153.24	3840.62	4104.06	3407.76	2628.19	1484.56	3184.07	3365.58	3214.45	2118.57	2471.7	4058.78	4841.19	2918.76
			0.926496	0.959239	1.13276	1.13757	0.744029	0.868618	0.937165	1.00661	1.33998	0.965721	0.922889	0.859442	0.983868	1.20071	1.04167	0.973922	1.23067
	P1	Average 0-250 um (A)	2016.85	2978.75	2650.13	1489.02	1407.54	1982.98	1866.39	950.691	1087.98	1783.42	2308.29	1495.86	1469.41	2548.94	2277.08	2870.05	2446.37
		Average 250-500 um (B)	2041.02	2488.21	1784.64	1102.8	1847.14	2258.15	1856.35	792.261	871.878	1700.76	2425.11	1984.69	962.5	1246.36	2267.31	2441.93	1246.35
			0.988159	1.19715	1.48496	1.35022	0.762008	0.878144	1.00541	1.19997	1.24785	1.0486	0.951831	0.753699	1.52666	2.04511	1.00431	1.17532	1.96283
