# Supplementary material for: A regeneration-triggered metabolic adaptation is necessary for cell identity transitions and cell cycle re-entry to support blastema formation and bone regeneration
Source: eLife. 2022 Aug 22;11:e76987. doi: 10.7554/eLife.76987 (PMC9395193; doi:10.7554/eLife.76987)
Supplement: Figure 3—figure supplement 1—source data 1. [file elife-76987-fig3-figsupp1-data1.xlsx]

## Sheet: Fig3 – Figure Supplemen1D and H
Control (DMSO) condition for 3PO									3PO 15uM Condition
														Supp Fig2D 3PO Column
Number of independent experiments	Fish Internal reference	Regenerated area at 48 hpa	Measured fin leght	Total regenerated area normalized to fin lenght	Average Total regenerated area normalized to fin lenght				Number of independent experiments	Fish Internal reference	Regenerated area at 48 hpa	Measured fin leght	Total regenerated area normalized to fin lenght	% of regenerated area relative to control
Experiment #1	48 hpa BF 17x #1.tif	6.201	8.382	0.7398	0.688282				Experiment #1	48 hpa BF 17x #1.tif	2.126	9.264	0.229491	33.3425
	48 hpa BF 17x #2.tif	5.387	9.148	0.588872						48 hpa BF 17x #2.tif	3.784	9.479	0.399198	57.9992
	48 hpa BF 17x #3.tif	6.371	8.925	0.713838						48 hpa BF 17x #3.tif	6.571	9.833	0.66826	97.091
	48 hpa BF 17x #4.tif	5.791	8.056	0.718843						48 hpa BF 17x #4.tif	2.808	7.593	0.369814	53.73
	48 hpa BF 17x #7.tif	5.117	7.237	0.707061						48 hpa BF 17x #5.tif	1.496	7.376	0.20282	29.4676
	48 hpa BF 17x #5.tif	4.822	7.556	0.638168						48 hpa BF 17x #6.tif	3.805	8.94	0.425615	61.8373
	48 hpa BF 17x #6.tif	5.731	8.056	0.711395
									Experiment #2	48hpa BF 17x #1.tif	4.164	7.96	0.523116	82.7452
Experiment #2	48hpa BF 17x #1.tif	4.919	7.601	0.647152	0.6322					48hpa BF 17x #2.tif	4.28	8.586	0.498486	78.8494
	48hpa BF 17x #2.tif	5.748	8.169	0.703636						48hpa BF 17x #3.tif	4.398	7.584	0.579905	91.7281
	48hpa BF 17x #3.tif	5.066	7.455	0.679544						48hpa BF 17x #4.tif	3.315	8.891	0.372849	58.9764
	48hpa BF 17x #4 new.tif	4.397	8.821	0.49847
									Experiment #3	48hpa BF 17x #1.tif	5.906	7.713	0.76572	96.6325
Experiment #3	48hpa BF 17x #1.tif	5.499	7.145	0.769629	0.792404					48hpa BF 17x #2.tif	4.226	7.556	0.559291	70.5815
	48hpa BF 17x #3.tif	8.508	9.656	0.88111						48hpa BF 17x #3.tif	6.129	9.39	0.652716	82.3715
	48hpa BF 17x #4.tif	5.01	7.112	0.704443						48hpa BF 17x #4.tif	5.778	9.65	0.598756	75.562
	48hpa BF 17x #5.tif	7.628	9.366	0.814435
Control (DMSO) condition for MB6									MB6 Condition
														Supp Fig2H MB6 Column
Number of independent experiments	Fish Internal reference	Regenerated area at 48 hpa	Measured fin leght	Total regenerated area normalized to fin lenght	Average Total regenerated area normalized to fin lenght				Number of independent experiments	Fish Internal reference	Regenerated area at 48 hpa	Measured fin leght	Total regenerated area normalized to fin lenght
Experiment #1	#1	5.592	9.236	0.605457	0.785502				Experiment #1	#1	7.168	9.655	0.742413	94.5145
	#2	7.738	10.375	0.745831						#2	7.312	10.139	0.721176	91.8108
	#3	8.448	9.723	0.868868						#3	8.212	9.5	0.864421	110.047
	#4	8.694	9.431	0.921853						#4	8.001	9.361	0.854716	108.811
