# Supplementary material for: A regeneration-triggered metabolic adaptation is necessary for cell identity transitions and cell cycle re-entry to support blastema formation and bone regeneration
Source: eLife. 2022 Aug 22;11:e76987. doi: 10.7554/eLife.76987 (PMC9395193; doi:10.7554/eLife.76987)
Supplement: Figure 3—source data 1. [file elife-76987-fig3-data1.xlsx]

## Sheet: Fig3C 2DG
Control (PBS) condition for 2DG										2DG Condition
																Fig3C 0 hpa 2DG Column
Number of independent experiments	Fish Internal reference	2DG IP injection	Regenerated area at 48 hpa	Measured fin leght	Total regenerated area normalized to fin lenght	Average Total regenerated area normalized to fin lenght				Number of independent experiments	Fish Internal reference	2DG IP injection	Regenerated area at 48 hpa	Measured fin leght	Total regenerated area normalized to fin lenght	% of regenerated area relative to control
Experiment #1	#1	at 0 hpa	4.711	7.854	0.599822	0.608414				Experiment #1	#1	at 0 hpa	4.016	7.682	0.522781	85.9251
	#2		4.596	7	0.656571						#2		3.152	7.612	0.414083	68.0594
	#3		4.838	7.813	0.619224						#3		3.812	6.781	0.562159	92.3974
	#4		4.418	7.917	0.55804						#4		4.13	7.251	0.569577	93.6166
Experiment #2	#2	at 0 hpa	2.70467	6.04066	0.447745	0.476796				Experiment #2	#1		2.50725e+06	6446003	0.388962	81.5781
	#3		3.48396	6.21042	0.560987						#2	at 0 hpa	1.73263e+06	5876903	0.294821	61.8337
	#4		2.73351	6.48278	0.421658						#3		2.3163e+06	6555503	0.353337	74.1065
											#4		748642	5753549	0.130118	27.2901
																Fig3C 0-12 hpa 2DG Column
Number of independent experiments	Fish Internal reference	2DG IP injection	Regenerated area at 48 hpa	Measured fin leght	Total regenerated area normalized to fin lenght	Average Total regenerated area normalized to fin lenght				Number of independent experiments	Fish Internal reference	2DG IP injection	Regenerated area at 48 hpa	Measured fin leght	Total regenerated area normalized to fin lenght	% of regenerated area relative to control
Experiment #1	#1	at 0 and 12hpa	4.04	7.378	0.547574	0.434385				Experiment #1	#1	at 0 and 12hpa	2.177	7.181	0.303161	69.7909
	#2		3.095	7.99	0.387359						#2		2.347	6.904	0.339948	78.2596
	#3		3.805	7.738	0.491729						#3		2.076	6.722	0.308837	71.0975
	#4		3.031	7.847	0.386262						#4		1.963	7.306	0.268683	61.8537
	#5		2.21448	6.09613	0.36326						#5		2.586	7.308	0.353859	81.462
	#6		3.0412	7.07052	0.430125						#6		2.673	7.223	0.370068	85.1935
											#7		0.706789	6.35675	0.111187	25.5964
																Fig3C 0-24 hpa 2DG Column
										Number of independent experiments	Fish Internal reference	2DG IP injection	Regenerated area at 48 hpa	Measured fin leght	Total regenerated area normalized to fin lenght	% of regenerated area relative to control
Number of independent experiments	Fish Internal reference	2DG IP injection	Regenerated area at 48 hpa	Measured fin leght	Total regenerated area normalized to fin lenght	Average Total regenerated area normalized to fin lenght				Experiment #1	#1	at 0, 12 and 24hpa	1.748	7.268	0.240506	47.5287
Experiment #1	#1		4.557	7.222	0.630989	0.506023					#2		0.726	7.445	0.0975151	19.2709
	#2	at 0, 12 and 24hpa	3.523	7.194	0.489714						#3		1.219	7.39	0.164953	32.5979
	#3		2.833	7	0.404714						#4		2.056	7.792	0.26386	52.144
	#4		3.387	6.792	0.498675						#5		1.732	7.681	0.225491	44.5615
																Fig3C 0-36 hpa 2DG Column
Number of independent experiments	Fish Internal reference	2DG IP injection	Regenerated area at 48 hpa	Measured fin leght	Total regenerated area normalized to fin lenght	Average Total regenerated area normalized to fin lenght				Number of independent experiments	Fish Internal reference	2DG IP injection	Regenerated area at 48 hpa	Measured fin leght	Total regenerated area normalized to fin lenght	% of regenerated area relative to control
Experiment #1	#1	at 0, 12, 24 and 36hpa	4.529	8.999	0.503278	0.484319				Experiment #1	#1	at 0, 12, 24 and 36hpa	0.734	7.668	0.0957225	19.7643
	#2		4.234	8.361	0.506399						#2		0.901	7.459	0.120794	24.9409
	#3		3.656	8.945	0.40872						#3		1.004	7.711	0.130204	26.8838
	#4		5.246	8.755	0.5992						#4		0.738	7.042	0.1048	21.6386
	#5		4.07	8.392	0.484986						#5		0.604	6.933	0.0871196	17.988
	#6		3.382	7.197	0.469918
	#7		3.067	7.342	0.417734

## Sheet: Fig3O SO
Control (PBS:DMSO) Condition for Sodium Oxamate (SO)
Number of independent experiments	Fish Internal reference	2DG IP injection	Regenerated area at 48 hpa	Measured fin leght	Total regenerated area normalized to fin lenght	Average Total regenerated area normalized to fin lenght
Experiment #1	#1	at 0, 12, 24 and 36 hpa	3.445	6.847	0.50314	0.464709
	#2		3.084	6.862	0.449432
	#3		3.724	6.348	0.586641
	#4		4.105	8.042	0.510445
	#5		2.256	8.237	0.273886
Experiment #2	#1	at 0, 12, 24 and 36 hpa	3.068	6.487	0.472946	0.453961
	#2		5.163	9.036	0.571381
	#3		1.539	5.787	0.265941
	#4		3.188	6.911	0.461294
	#5		4.007	8.143	0.492079
	#6		4.458	8.626	0.51681
	#7		2.809	7.405	0.379338
	#8		2.964	6.281	0.471899
SO Condition
						Fig3O 0-36 hpa SO Column
Number of independent experiments	Fish Internal reference	2DG IP injection	Regenerated area at 48 hpa	Measured fin leght	Total regenerated area normalized to fin lenght	% of regenerated area relative to control
Experiment #1	#1	at 0, 12, 24 and 36 hpa	3.613	7.806	0.462849	99.5998
	#2		3.096	8.75	0.353829	76.1398
	#3		2.782	6.931	0.401385	86.3734
	#4		2.904	6.903	0.420687	90.5269
	#5		3.472	7.625	0.455344	97.9848
Experiment #2	#1	at 0, 12, 24 and 36 hpa	2.416	7.542	0.320339	70.5654
	#2		2.248	6.295	0.357109	78.6651
	#3		1.535	6.855	0.223924	49.3267
	#4		3.202	9.076	0.352799	77.7156
	#5		2.673	8.377	0.319088	70.2897
	#6		2.92	8.343	0.349994	77.0978
	#7		2.765	7.35	0.37619	82.8685

## Sheet: Fig3S UK0059
Control (PBS:DMSO) Condition for UK0059
Number of independent experiments	Fish Internal reference	2DG IP injection	Regenerated area at 48 hpa	Measured fin leght	Total regenerated area normalized to fin lenght	Average Total regenerated area normalized to fin lenght
Experiment #1	#1	at 0, 12, 24 and 36 hpa	3.333	7.814	0.426542	0.444987
	#2		4.915	9.298	0.528608
	#3		4.049	7.982	0.507266
	#4		2.831	8.131	0.348174
	#5		3.313	7.839	0.42263
	#6		3.477	7.962	0.436699
Experiment #1	#1	at 0, 12, 24 and 36 hpa	3.281	7.743	0.423738	0.423359
	#2		4.046	9.681	0.417932
	#3		3.289	7.431	0.442605
	#4		3.299	8	0.412375
	#5		3.262	7.764	0.420144
UK0059 Condition
						Fig3S 0-36 hpa UK0059 Column
Number of independent experiments	Fish Internal reference	2DG IP injection	Regenerated area at 48 hpa	Measured fin leght	Total regenerated area normalized to fin lenght	% of regenerated area relative to control
Experiment #1	#1	at 0, 12, 24 and 36 hpa	5.59	9.439	0.592224	133.088
	#2		4.108	7.42	0.553639	124.417
	#3		4.493	8.922	0.503587	113.169
	#4		3.551	7.396	0.480124	107.896
	#5		3.971	8.621	0.460619	103.513
Experiment #1	#1	at 0, 12, 24 and 36 hpa	3.483	7.361	0.473169	111.766
	#2		3.617	7.403	0.488586	115.407
	#3		3.738	7.181	0.52054	122.955
	#4		3.984	7.139	0.558061	131.818
	#5		2.477	7.487	0.33084	78.1465
	#6		3.571	7.111	0.50218	118.618
