# Supplementary material for: A regeneration-triggered metabolic adaptation is necessary for cell identity transitions and cell cycle re-entry to support blastema formation and bone regeneration
Source: eLife. 2022 Aug 22;11:e76987. doi: 10.7554/eLife.76987 (PMC9395193; doi:10.7554/eLife.76987)
Supplement: Figure 4—source data 1. [file elife-76987-fig4-data1.xlsx]

## Sheet: Fig4C
										Fig4C
	Biological Replicate (internal reference)	Position	Gene Name	Sample Name	Cq values	Average Cq values House keeping gene (ef1a)	dCq	Log2(-dCq)*100	geoMean	Relative Fold Change
bmp2a	1	A1	Ef1a	PBS	16.81	16.93						Summary bmp2a relative fold change
		A2	Ef1a		17.04								PBS	2DG	Relative Fold Change
		A3	Ef1a		16.94							Biological Rep 1	0.0884204	0.124469	1.40769
		A4	Ef1a	2DG	17.08	16.8633						Biological Rep 2	0.129754	0.0884204	0.681444
		A5	Ef1a		16.54							Biological Rep 3	0.14199	0.0733288	0.516438
		A6	Ef1a		16.97							Biological Rep 4	0.0932463	0.10515	1.12766
		B1	bmp2a	PBS	27.15		10.22	0.0838443	0.0884204	1.40769		Biological Rep 5	0.0894478	0.0760903	0.850667
		B2	bmp2a		26.84		9.91	0.103942				Biological Rep 6	0.0921752	0.0806149	0.874583
		B3	bmp2a		27.23		10.3	0.0793215				Biological Rep 9	0.123039	0.143308	1.16473
		B4	bmp2a	2DG	26.62		9.75667	0.115598	0.124469			Biological Rep 10	0.1183	0.118027	0.997692
		B5	bmp2a		26.32		9.45667	0.142318				Biological Rep 11	0.08269	0.0601145	0.726986
		B6	bmp2a		26.6		9.73667	0.117212				Biological Rep 12	0.100402	0.130959	1.30435
												Biological Rep 13	0.0776891	0.101803	1.31039
	2	A7	Ef1a	PBS	17.45	17.58
		A8	Ef1a		17.68
		A9	Ef1a		17.61
		A10	Ef1a	2DG	16.45	16.5267
		A11	Ef1a		16.43
		A12	Ef1a		16.7
		E7	bmp2a	PBS	27.3		9.72	0.118574	0.129754	0.681444
		E8	bmp2a		27.18		9.6	0.128858
		E9	bmp2a		27.03		9.45	0.142977
		E10	bmp2a	2DG	26.59		10.0633	0.0934619	0.0884204
		E11	bmp2a		26.64		10.1133	0.0902783
		E12	bmp2a		26.78		10.2533	0.0819293
	3	A1	Ef1a	PBS	17.44	17.37
		A2	Ef1a		17.31
		A3	Ef1a		17.36
		A4	Ef1a	2DG	16.95	16.91
		A5	Ef1a		16.84
		A6	Ef1a		16.94
		E1	bmp2a	PBS	27		9.63	0.126206	0.14199	0.516438
		E2	bmp2a		26.58		9.21	0.168855
		E3	bmp2a		26.91		9.54	0.13433
		E4	bmp2a	2DG	27.36		10.45	0.0714886	0.0733288
		E5	bmp2a		27.41		10.5	0.0690534
		E6	bmp2a		27.2		10.29	0.0798732
	4	A7	Ef1a	PBS	17.1	17.3533
		A8	Ef1a		17.64
		A9	Ef1a		17.32
		A10	Ef1a	2DG	16.93	17.1967
		A11	Ef1a		17.2
		A12	Ef1a		17.46
		E7	bmp2a	PBS	27.53		10.1767	0.0864009	0.0932463	1.12766
		E8	bmp2a		27.42		10.0667	0.0932463
		E9	bmp2a		27.31		9.95667	0.100634
		E10	bmp2a	2DG	26.98		9.78333	0.113481	0.10515
		E11	bmp2a		27.27		10.0733	0.0928164
		E12	bmp2a		27.02		9.82333	0.110378
	5	A1	Ef1a	PBS	16.68	16.7433
		A2	Ef1a		16.74
		A3	Ef1a		16.81
		A4	Ef1a	2DG	16.71	16.54
		A5	Ef1a		16.51
		A6	Ef1a		16.4
		E1	bmp2a	PBS	26.89		10.1467	0.0882163	0.0894478	0.850667
		E2	bmp2a		26.77		10.0267	0.0958678
		E3	bmp2a		26.95		10.2067	0.0846228
		E4	bmp2a	2DG	27.02		10.48	0.0700173	0.0760903
		E5	bmp2a		26.84		10.3	0.0793215
		E6	bmp2a		26.84		10.3	0.0793215
	6	A7	Ef1a	PBS	16.98	16.8567
		A8	Ef1a		16.76
		A9	Ef1a		16.83
		A10	Ef1a	2DG	16.47	16.56
		A11	Ef1a		16.58
		A12	Ef1a		16.63
		E7	bmp2a	PBS	26.99		10.1333	0.0890354	0.0921752	0.874583
		E8	bmp2a		27.05		10.1933	0.0854085
		E9	bmp2a		26.78		9.92333	0.102986
		E10	bmp2a	2DG	26.92		10.36	0.0760903	0.0806149
		E11	bmp2a		26.77		10.21	0.0844275
		E12	bmp2a		26.82		10.26	0.0815516
	9	A1	Ef1a	PBS	17.54	17.47
		A2	Ef1a		17.37
		A3	Ef1a		17.5
		A4	Ef1a	2DG	17.14	17.1633
		A5	Ef1a		17.22
		A6	Ef1a		17.13
		E1	bmp2a	PBS	27.07		9.6	0.128858	0.123039	1.16473
		E2	bmp2a		26.98		9.51	0.137153
		E3	bmp2a		27.36		9.89	0.105393
		E4	bmp2a	2DG	26.62		9.45667	0.142318	0.143308
		E5	bmp2a		26.64		9.47667	0.140359
		E6	bmp2a		26.57		9.40667	0.147337
	10	A7	Ef1a	PBS	17.34	17.4233
		A8	Ef1a		17.56
		A9	Ef1a		17.37
		A10	Ef1a	2DG	17.02	17.1367
		A11	Ef1a		17.06
		A12	Ef1a		17.33
		E7	bmp2a	PBS	27.22		9.79667	0.112437	0.1183	0.997692
		E8	bmp2a		27.11		9.68667	0.121345
		E9	bmp2a		27.11		9.68667	0.121345
		E10	bmp2a	2DG	26.69		9.55333	0.133094	0.118027
		E11	bmp2a		26.82		9.68333	0.121626
		E12	bmp2a		27.08		9.94333	0.101568
	11	A1	Ef1a	PBS	17.88	17.8033
		A2	Ef1a		17.77
		A3	Ef1a		17.76
		A4	Ef1a	2DG	17.63	17.48
		A5	Ef1a		17.43
		A6	Ef1a		17.38
		E1	bmp2a	PBS	27.96		10.1567	0.087607	0.08269	0.726986
		E2	bmp2a		28.08		10.2767	0.0806149
		E3	bmp2a		28.09		10.2867	0.080058
		E4	bmp2a	2DG	28.25		10.77	0.0572673	0.0601145
		E5	bmp2a		28.18		10.7	0.0601145
		E6	bmp2a		28.11		10.63	0.0631032
	12	A7	Ef1a	PBS	17.71	17.7167
		A8	Ef1a		17.69
		A9	Ef1a		17.75
		A10	Ef1a	2DG	17.72	17.6067
		A11	Ef1a		17.44
		A12	Ef1a		17.66
		E7	bmp2a	PBS	27.74		10.0233	0.0960895	0.100402	1.30435
		E8	bmp2a		27.73		10.0133	0.0967579
		E9	bmp2a		27.56		9.84333	0.108858
		E10	bmp2a	2DG	27		9.39333	0.148705	0.130959
		E11	bmp2a		27.17		9.56333	0.132175
		E12	bmp2a		27.38		9.77333	0.11427
	13	A1	Ef1a	PBS	16.77	16.64
		A2	Ef1a		16.46
		A3	Ef1a		16.69
		A4	Ef1a	2DG	16.74	16.6633
		A5	Ef1a		16.45
		A6	Ef1a		16.8
		E1	bmp2a	PBS	26.82		10.18	0.0862015	0.0776891	1.31039
		E2	bmp2a		26.88		10.24	0.08269
		E3	bmp2a		27.21		10.57	0.0657829
		E4	bmp2a	2DG	26.8		10.1367	0.0888299	0.101803
		E5	bmp2a		26.75		10.0867	0.0919625
		E6	bmp2a		26.26		9.59667	0.129156
										Fig4C
	Biological Replicate (internal reference)	Position	Gene Name	Sample Name	Cq values	Average Cq values House keeping gene (ef1a)	dCq	Log2(-dCq)*100	geoMean	Relative Fold Change
bmp2b	1	A1	Ef1a	PBS	16.35	16.3967						Summary bmp2b relative fold change
		A2	Ef1a		16.42								PBS	2DG	Relative Fold Change
		A3	Ef1a		16.42							Biological Rep 1	0.0149248	0.0204823	1.37237
		A4	Ef1a	2DG	16.01	16.09						Biological Rep 2	0.0114159	0.0168691	1.47768
		A5	Ef1a		16.24							Biological Rep 3	0.0185881	0.0132352	0.712025
		A6	Ef1a		16.02							Biological Rep 4	0.0145642	0.0215504	1.47968
		D1	bmp2b	PBS	29.36		12.9633	0.0125213	0.0149248	1.37237		Biological Rep 5	0.0149939	0.0205297	1.3692
		D2	bmp2b		28.76		12.3633	0.0189787				Biological Rep 6	0.0205772	0.0350897	1.70527
		D3	bmp2b		29.2		12.8033	0.0139898				Biological Rep 7	0.0172235	0.0241895	1.40444
		D4	bmp2b	2DG	28.32		12.23	0.0208163	0.0204823			Biological Rep 9	0.0163888	0.0374348	2.28416
		D5	bmp2b		28.44		12.35	0.0191549				Biological Rep 10	0.0182056	0.0286337	1.5728
		D6	bmp2b		28.27		12.18	0.0215504				Biological Rep 13	0.00601949	0.00883343	1.46747
	2	A7	Ef1a	PBS	16.49	16.6233
		A8	Ef1a		16.71
		A9	Ef1a		16.67
		A10	Ef1a	2DG	16.15	16.1367
		A11	Ef1a		16.22
		A12	Ef1a		16.04
		D7	bmp2b	PBS	29.77		13.1467	0.011027	0.0114159	1.47768
		D8	bmp2b		29.58		12.9567	0.0125792
		D9	bmp2b		29.81		13.1867	0.0107255
		D10	bmp2b	2DG	28.3		12.1633	0.0218008	0.0168691
		D11	bmp2b		28.62		12.4833	0.0174639
		D12	bmp2b		29.09		12.9533	0.0126083
	3	A1	Ef1a	PBS	16.41	16.5067
		A2	Ef1a		16.63
		A3	Ef1a		16.48
		A4	Ef1a	2DG	16.11	16.1667
		A5	Ef1a		16.11
		A6	Ef1a		16.28
		C1	bmp2b	PBS	29.2		12.6933	0.0150982	0.0185881	0.712025
		C2	bmp2b		28.59		12.0833	0.0230438
		C3	bmp2b		28.91		12.4033	0.0184597
		C4	bmp2b	2DG	29.24		13.0733	0.011602	0.0132352
		C5	bmp2b		28.86		12.6933	0.0150982
		C6	bmp2b		29.09		12.9233	0.0128733
	4	A7	Ef1a	PBS	16.39	16.51
		A8	Ef1a		16.71
		A9	Ef1a		16.43
		A10	Ef1a	2DG	16.43	16.4333
		A11	Ef1a		16.56
		A12	Ef1a		16.31
		C7	bmp2b	PBS	29.31		12.8	0.0140222	0.0145642	1.47968
		C8	bmp2b		29.37		12.86	0.013451
		C9	bmp2b		29.1		12.59	0.0162193
		C10	bmp2b	2DG	28.34		11.9067	0.0260457	0.0215504
		C11	bmp2b		28.7		12.2667	0.0202939
		C12	bmp2b		28.8		12.3667	0.0189349
	5	A1	Ef1a	PBS	No amplification	16.94
		A2	Ef1a		17
		A3	Ef1a		16.88
		A7	Ef1a	2DG	16.6	16.41
		A8	Ef1a		16.22
		A9	Ef1a		16.41
		B1	bmp2b	PBS	29.65		12.71	0.0149248	0.0149939	1.3692
		B2	bmp2b		29.53		12.59	0.0162193
		B3	bmp2b		29.75		12.81	0.0139253
		B7	bmp2b	2DG	28.66		12.25	0.0205297	0.0205297
		B8	bmp2b		28.67		12.26	0.0203879
		B9	bmp2b		28.65		12.24	0.0206725
	6	A1	Ef1a	PBS	16.8	16.71
		A2	Ef1a		16.6
		A3	Ef1a		16.73
		A7	Ef1a	2DG	16.23	16.1467
		A8	Ef1a		16.17
		A9	Ef1a		16.04
		H4	bmp2b	PBS	29.16		12.45	0.0178721	0.0205772	1.70527
		H5	bmp2b		28.91		12.2	0.0212537
		H6	bmp2b		28.8		12.09	0.0229376
		H10	bmp2b	2DG	27.48		11.3333	0.0387549	0.0350897
		H11	bmp2b		27.75		11.6033	0.0321402
		H12	bmp2b		27.64		11.4933	0.0346866
	7	A1	Ef1a	PBS	16.57	16.55
		A2	Ef1a		16.48
		A3	Ef1a		16.6
		A7	Ef1a	2DG	17.06	16.9567
		A8	Ef1a		16.81
		A9	Ef1a		17
		H4	bmp2b	PBS	28.86		12.31	0.0196934	0.0172235	1.40444
		H5	bmp2b		29.35		12.8	0.0140222
		H6	bmp2b		28.95		12.4	0.0185024
		H10	bmp2b	2DG	28.9		11.9433	0.0253921	0.0241895
		H11	bmp2b		29.04		12.0833	0.0230438
		H12	bmp2b		29.26		12.3033	0.0197846
	9	A1	Ef1a	PBS	16.51	16.355
		A2	Ef1a		16.4
		A3	Ef1a		16.31
		A7	Ef1a	2DG	16.61	16.46
		A8	Ef1a		16.05
		A9	Ef1a		16.31
		A4	bmp2b	PBS	28.69		12.335	0.0193551	0.0163888	2.28416
		A5	bmp2b		29.02		12.665	0.0153977
		A6	bmp2b		29.08		12.725	0.0147704
		A10	bmp2b	2DG	27.64		11.18	0.0431007	0.0374348
		A11	bmp2b		27.78		11.32	0.0391147
		A12	bmp2b		28.11		11.65	0.0311172
	10	A1	Ef1a	PBS	15.51	15.9867
		A2	Ef1a		16.2
		A3	Ef1a		16.25
		A7	Ef1a	2DG	15.89	15.9567
		A8	Ef1a		16.09
		A9	Ef1a		15.89
		A4	bmp2b	PBS	28.41		12.4233	0.0182056	0.0182056	1.5728
		A5	bmp2b		28.47		12.4833	0.0174639
		A6	bmp2b		28.35		12.3633	0.0189787
		A10	bmp2b	2DG	27.8		11.8433	0.0272146	0.0286337
		A11	bmp2b		27.63		11.6733	0.030618
		A12	bmp2b		27.75		11.7933	0.0281743
	13	A7	Ef1a	PBS	17.14	17.01
		A8	Ef1a		17.06
		A9	Ef1a		16.83
		A10	Ef1a	2DG	17.36	17.3033
		A11	Ef1a		17.22
		A12	Ef1a		17.33
		G7	bmp2b	PBS	31.08		14.07	0.00581444	0.00601949	1.46747
		G8	bmp2b		30.91		13.9	0.00654159
		G9	bmp2b		31.1		14.09	0.00573439
		G10	bmp2b	2DG	30.83		13.5267	0.00847359	0.00883343
		G11	bmp2b		30.94		13.6367	0.00785153
		G12	bmp2b		30.54		13.2367	0.0103602
										Fig4C
	Biological Replicate (internal reference)	Position	Gene Name	Sample Name	Cq values	Average Cq values House keeping gene (ef1a)	dCq	Log2(-dCq)*100	geoMean	Relative Fold Change
nfkbiaa	1	A1	Ef1a	PBS	16.81	16.93						Summary nfkbiaa relative fold change
		A2	Ef1a		17.04								PBS	2DG	Relative Fold Change
		A3	Ef1a		16.94							Biological Rep 1	1.31999	0.94859	0.718636
		A4	Ef1a	2DG	17.08	16.8633						Biological Rep 3	0.63604	3.22774	5.07474
		A5	Ef1a		16.54							Biological Rep 4	0.856895	1.16247	1.3566
		A6	Ef1a		16.97							Biological Rep 5	0.504825	0.681691	1.35035
		B1	nfkbiaa	PBS	23.15		6.22	1.34151	1.31999	0.718636		Biological Rep 6	0.652412	1.09216	1.67404
		B2	nfkbiaa		23.22		6.29	1.27797				Biological Rep 9	0.507164	0.909948	1.79419
		B3	nfkbiaa		23.15		6.22	1.34151				Biological Rep 10	0.806934	0.768716	0.952638
		B4	nfkbiaa	2DG	23.7		6.83667	0.8749	0.94859			Biological Rep 11	1.17326	2.78406	2.37293
		B5	nfkbiaa		23.57		6.70667	0.957397				Biological Rep 12	0.618648	1.1023	1.7818
		B6	nfkbiaa		23.48		6.61667	1.01903				Biological Rep 13	0.72056	1.12807	1.56555
	3	A1	Ef1a	PBS	17.44	17.37
		A2	Ef1a		17.31
		A3	Ef1a		17.36
		A4	Ef1a	2DG	16.95	16.91
		A5	Ef1a		16.84
		A6	Ef1a		16.94
		B1	nfkbiaa	PBS	24.72		7.35	0.612956	0.63604	5.07474
		B2	nfkbiaa		24.75		7.38	0.600342
		B3	nfkbiaa		24.53		7.16	0.699238
		B4	nfkbiaa	2DG	22.2		4.83	3.51581	3.22774
		B5	nfkbiaa		22.46		5.09	2.93601
		B6	nfkbiaa		22.31		4.94	3.25771
	4	A7	Ef1a	PBS	17.1	17.3533
		A8	Ef1a		17.64
		A9	Ef1a		17.32
		A10	Ef1a	2DG	16.93	17.1967
		A11	Ef1a		17.2
		A12	Ef1a		17.46
		B7	nfkbiaa	PBS	24.39		7.03667	0.761644	0.856895	1.3566
		B8	nfkbiaa		24.08		6.72667	0.944216
		B9	nfkbiaa		24.19		6.83667	0.8749
		B10	nfkbiaa	2DG	23.63		6.43333	1.15711	1.16247
		B11	nfkbiaa		23.63		6.43333	1.15711
		B12	nfkbiaa		23.61		6.41333	1.17326
	5	A1	Ef1a	PBS	16.68	16.7433
		A2	Ef1a		16.74
		A3	Ef1a		16.81
		A4	Ef1a	2DG	16.71	16.54
		A5	Ef1a		16.51
		A6	Ef1a		16.4
		B1	nfkbiaa	PBS	24.43		7.68667	0.485381	0.504825	1.35035
		B2	nfkbiaa		24.49		7.74667	0.465609
		B3	nfkbiaa		24.2		7.45667	0.569272
		B4	nfkbiaa	2DG	23.8		7.26	0.652412	0.681691
		B5	nfkbiaa		23.77		7.23	0.666121
		B6	nfkbiaa		23.64		7.1	0.728932
	6	A7	Ef1a	PBS	16.98	16.8567
		A8	Ef1a		16.76
		A9	Ef1a		16.83
		A10	Ef1a	2DG	16.47	16.56
		A11	Ef1a		16.58
		A12	Ef1a		16.63
		B7	nfkbiaa	PBS	24.2		7.34333	0.615795	0.652412	1.67404
		B8	nfkbiaa		24.03		7.17333	0.692806
		B9	nfkbiaa		24.12		7.26333	0.650907
		B10	nfkbiaa	2DG	23.01		6.45	1.14382	1.09216
		B11	nfkbiaa		23		6.44	1.15177
		B12	nfkbiaa		23.22		6.66	0.988872
	9	A1	Ef1a	PBS	17.54	17.47
		A2	Ef1a		17.37
		A3	Ef1a		17.5
		A4	Ef1a	2DG	17.14	17.1633
		A5	Ef1a		17.22
		A6	Ef1a		17.13
		B1	nfkbiaa	PBS	25.06		7.59	0.519018	0.507164	1.79419
		B2	nfkbiaa		25.31		7.84	0.43644
		B3	nfkbiaa		24.91		7.44	0.575886
		B4	nfkbiaa	2DG	23.85		6.68667	0.970762	0.909948
		B5	nfkbiaa		24.08		6.91667	0.827706
		B6	nfkbiaa		23.9		6.73667	0.937694
	10	A7	Ef1a	PBS	17.34	17.4233
		A8	Ef1a		17.56
		A9	Ef1a		17.37
		A10	Ef1a	2DG	17.02	17.1367
		A11	Ef1a		17.06
		A12	Ef1a		17.33
		B7	nfkbiaa	PBS	24.38		6.95667	0.805072	0.806934	0.952638
		B8	nfkbiaa		24.17		6.74667	0.931217
		B9	nfkbiaa		24.58		7.15667	0.700856
		B10	nfkbiaa	2DG	24.07		6.93333	0.818199	0.768716
		B11	nfkbiaa		24.1		6.96333	0.80136
		B12	nfkbiaa		24.31		7.17333	0.692806
	11	A1	Ef1a	PBS	17.88	17.8033
		A2	Ef1a		17.77
		A3	Ef1a		17.76
		A4	Ef1a	2DG	17.63	17.48
		A5	Ef1a		17.43
		A6	Ef1a		17.38
		B1	nfkbiaa	PBS	24.31		6.50667	1.09976	1.17326	2.37293
		B2	nfkbiaa		24.19		6.38667	1.19515
		B3	nfkbiaa		24.15		6.34667	1.22875
		B4	nfkbiaa	2DG	22.64		5.16	2.79695	2.78406
		B5	nfkbiaa		22.81		5.33	2.48605
		B6	nfkbiaa		22.49		5.01	3.10341
	12	A7	Ef1a	PBS	17.71	17.7167
		A8	Ef1a		17.69
		A9	Ef1a		17.75
		A10	Ef1a	2DG	17.72	17.6067
		A11	Ef1a		17.44
		A12	Ef1a		17.66
		B7	nfkbiaa	PBS	25.17		7.45333	0.570589	0.618648	1.7818
		B8	nfkbiaa		24.9		7.18333	0.68802
		B9	nfkbiaa		25.09		7.37333	0.603122
		B10	nfkbiaa	2DG	24.16		6.55333	1.06476	1.1023
		B11	nfkbiaa		24.05		6.44333	1.14911
		B12	nfkbiaa		24.12		6.51333	1.09469
	13	A1	Ef1a	PBS	16.77	16.64
		A2	Ef1a		16.46
		A3	Ef1a		16.69
		A4	Ef1a	2DG	16.74	16.6633
		A5	Ef1a		16.45
		A6	Ef1a		16.8
		B1	nfkbiaa	PBS	23.86		7.22	0.670754	0.72056	1.56555
		B2	nfkbiaa		23.65		7.01	0.775854
		B3	nfkbiaa		23.76		7.12	0.718897
		B4	nfkbiaa	2DG	23.11		6.44667	1.14646	1.12807
		B5	nfkbiaa		23.28		6.61667	1.01903
		B6	nfkbiaa		23.01		6.34667	1.22875
										Fig4C
	Biological Replicate (internal reference)	Position	Gene Name	Sample Name	Cq values	Average Cq values House keeping gene (ef1a)	dCq	Log2(-dCq)*100	geoMean	Relative Fold Change
nfkbiab	1	A1	Ef1a	PBS	16.81	16.93						Summary nfkbiab relative fold change
		A2	Ef1a		17.04								PBS	2DG	Relative Fold Change
		A3	Ef1a		16.94							Biological Rep 1	2.47459	1.82833	0.73884
		A4	Ef1a	2DG	17.08	16.8633						Biological Rep 3	2.18938	5.24347	2.39496
		A5	Ef1a		16.54							Biological Rep 4	2.37379	2.90229	1.22264
		A6	Ef1a		16.97							Biological Rep 5	0.933371	1.33224	1.42734
		C1	nfkbiab	PBS	22.37		5.44	2.30355	2.47459	0.73884		Biological Rep 6	0.977514	1.85385	1.89649
		C2	nfkbiab		22.44		5.51	2.19445				Biological Rep 9	1.20624	1.67465	1.38831
		C3	nfkbiab		21.99		5.06	2.9977				Biological Rep 10	2.65833	2.44052	0.918064
		C4	nfkbiab	2DG	22.62		5.75667	1.84957	1.82833			Biological Rep 11	2.57968	4.33848	1.68179
		C5	nfkbiab		22.43		5.56667	2.10992				Biological Rep 12	1.76605	2.22508	1.25992
		C6	nfkbiab		22.86		5.99667	1.56611				Biological Rep 13	1.15177	2.25093	1.95432
	3	A1	Ef1a	PBS	17.44	17.37
		A2	Ef1a		17.31
		A3	Ef1a		17.36
		A4	Ef1a	2DG	16.95	16.91
		A5	Ef1a		16.84
		A6	Ef1a		16.94
		C1	nfkbiab	PBS	22.81		5.44	2.30355	2.18938	2.39496
		C2	nfkbiab		22.86		5.49	2.22508
		C3	nfkbiab		22.98		5.61	2.04749
		C4	nfkbiab	2DG	21.11		4.2	5.44094	5.24347
		C5	nfkbiab		21.17		4.26	5.2193
		C6	nfkbiab		21.21		4.3	5.07658
	4	A7	Ef1a	PBS	17.1	17.3533
		A8	Ef1a		17.64
		A9	Ef1a		17.32
		A10	Ef1a	2DG	16.93	17.1967
		A11	Ef1a		17.2
		A12	Ef1a		17.46
		C7	nfkbiab	PBS	22.78		5.42667	2.32493	2.37379	1.22264
		C8	nfkbiab		22.78		5.42667	2.32493
		C9	nfkbiab		22.69		5.33667	2.47459
		C10	nfkbiab	2DG	22.33		5.13333	2.84913	2.90229
		C11	nfkbiab		22.21		5.01333	3.09625
		C12	nfkbiab		22.37		5.17333	2.77122
	5	A1	Ef1a	PBS	16.68	16.7433
		A2	Ef1a		16.74
		A3	Ef1a		16.81
		A4	Ef1a	2DG	16.71	16.54
		A5	Ef1a		16.51
		A6	Ef1a		16.4
		C1	nfkbiab	PBS	23.36		6.61667	1.01903	0.933371	1.42734
		C2	nfkbiab		23.33		6.58667	1.04044
		C3	nfkbiab		23.77		7.02667	0.766942
		C4	nfkbiab	2DG	22.93		6.39	1.19239	1.33224
		C5	nfkbiab		22.64		6.1	1.45786
		C6	nfkbiab		22.74		6.2	1.36024
	6	A7	Ef1a	PBS	16.98	16.8567
		A8	Ef1a		16.76
		A9	Ef1a		16.83
		A10	Ef1a	2DG	16.47	16.56
		A11	Ef1a		16.58
		A12	Ef1a		16.63
		C7	nfkbiab	PBS	23.52		6.66333	0.98659	0.977514	1.89649
		C8	nfkbiab		23.62		6.76333	0.920521
		C9	nfkbiab		23.46		6.60333	1.02849
		C10	nfkbiab	2DG	22.27		5.71	1.91038	1.85385
		C11	nfkbiab		22.36		5.8	1.79484
		C12	nfkbiab		22.31		5.75	1.85814
	9	A1	Ef1a	PBS	17.54	17.47
		A2	Ef1a		17.37
		A3	Ef1a		17.5
		A4	Ef1a	2DG	17.14	17.1633
		A5	Ef1a		17.22
		A6	Ef1a		17.13
		C1	nfkbiab	PBS	23.88		6.41	1.17597	1.20624	1.38831
		C2	nfkbiab		23.78		6.31	1.26038
		C3	nfkbiab		23.87		6.4	1.18415
		C4	nfkbiab	2DG	23.21		6.04667	1.51277	1.67465
		C5	nfkbiab		22.98		5.81667	1.77423
		C6	nfkbiab		23		5.83667	1.7498
	10	A7	Ef1a	PBS	17.34	17.4233
		A8	Ef1a		17.56
		A9	Ef1a		17.37
		A10	Ef1a	2DG	17.02	17.1367
		A11	Ef1a		17.06
		A12	Ef1a		17.33
		C7	nfkbiab	PBS	22.68		5.25667	2.61569	2.65833	0.918064
		C8	nfkbiab		22.64		5.21667	2.68922
		C9	nfkbiab		22.65		5.22667	2.67065
		C10	nfkbiab	2DG	22.29		5.15333	2.80991	2.44052
		C11	nfkbiab		22.52		5.38333	2.39583
		C12	nfkbiab		22.67		5.53333	2.15924
	11	A1	Ef1a	PBS	17.88	17.8033
		A2	Ef1a		17.77
		A3	Ef1a		17.76
		A4	Ef1a	2DG	17.63	17.48
		A5	Ef1a		17.43
		A6	Ef1a		17.38
		C1	nfkbiab	PBS	23.13		5.32667	2.4918	2.57968	1.68179
		C2	nfkbiab		22.97		5.16667	2.78406
		C3	nfkbiab		23.14		5.33667	2.47459
		C4	nfkbiab	2DG	21.99		4.51	4.38889	4.33848
		C5	nfkbiab		21.99		4.51	4.38889
		C6	nfkbiab		22.04		4.56	4.23939
	12	A7	Ef1a	PBS	17.71	17.7167
		A8	Ef1a		17.69
		A9	Ef1a		17.75
		A10	Ef1a	2DG	17.72	17.6067
		A11	Ef1a		17.44
		A12	Ef1a		17.66
		C7	nfkbiab	PBS	23.49		5.77333	1.82833	1.76605	1.25992
		C8	nfkbiab		23.62		5.90333	1.67078
		C9	nfkbiab		23.51		5.79333	1.80315
		C10	nfkbiab	2DG	23.2		5.59333	2.07128	2.22508
		C11	nfkbiab		23.16		5.55333	2.12951
		C12	nfkbiab		22.93		5.32333	2.49757
	13	A1	Ef1a	PBS	16.77	16.64
		A2	Ef1a		16.46
		A3	Ef1a		16.69
		A4	Ef1a	2DG	16.74	16.6633
		A5	Ef1a		16.45
		A6	Ef1a		16.8
		C1	nfkbiab	PBS	22.93		6.29	1.27797	1.15177	1.95432
		C2	nfkbiab		23.18		6.54	1.07464
		C3	nfkbiab		23.13		6.49	1.11254
		C4	nfkbiab	2DG	22.12		5.45667	2.27709	2.25093
		C5	nfkbiab		22.11		5.44667	2.29293
		C6	nfkbiab		22.18		5.51667	2.18433
										Fig4C
	Biological Replicate (internal reference)	Position	Gene Name	Sample Name	Cq values	Average Cq values House keeping gene (ef1a)	dCq	Log2(-dCq)*100	geoMean	Relative Fold Change		Summary cyp26b1 relative fold change
cyp26b1	1	A1	Ef1a	PBS	16.81	16.93							PBS	2DG	Relative Fold Change
		A2	Ef1a		17.04							Biological Rep 1	0.562733	0.182655	0.324585
		A3	Ef1a		16.94							Biological Rep 2	0.864851	0.246648	0.285191
		A4	Ef1a	2DG	17.08	16.8633						Biological Rep 3	0.367001	0.20455	0.557354
		A5	Ef1a		16.54							Biological Rep 4	0.320232	0.218725	0.68302
		A6	Ef1a		16.97							Biological Rep 5	0.306478	0.168855	0.550953
		F1	Cyp26b1	PBS	24.38		7.45	0.571908		0.324585		Biological Rep 6	0.28267	0.189096	0.668964
		F2	Cyp26b1		24.48		7.55	0.533609				Biological Rep 9	0.333831	0.235509	0.705475
		F3	Cyp26b1		24.35		7.42	0.583925				Biological Rep 10	0.385247	0.194862	0.50581
		F4	Cyp26b1	2DG	25.83		8.96667	0.199878				Biological Rep 11	0.271782	0.239903	0.882703
		F5	Cyp26b1		26.14		9.27667	0.16123				Biological Rep 12	0.362786	0.278778	0.768438
		F6	Cyp26b1		25.91		9.04667	0.189096				Biological Rep 13	0.349619	0.156098	0.44648
	2	A7	Ef1a	PBS	17.45	17.58
		A8	Ef1a		17.68
		A9	Ef1a		17.61
		A10	Ef1a	2DG	16.45	16.5267
		A11	Ef1a		16.43
		A12	Ef1a		16.7
		F7	Cyp26b1	PBS	24.47		6.89	0.843147		0.285191
		F8	Cyp26b1		24.72		7.14	0.708999
		F9	Cyp26b1		24.11		6.53	1.08212
		F10	Cyp26b1	2DG	25.25		8.72333	0.2366
		F11	Cyp26b1		25.15		8.62333	0.253582
		F12	Cyp26b1		25.17		8.64333	0.250091
	3	A1	Ef1a	PBS	17.44	17.37
		A2	Ef1a		17.31
		A3	Ef1a		17.36
		A4	Ef1a	2DG	16.95	16.91
		A5	Ef1a		16.84
		A6	Ef1a		16.94
		F1	Cyp26b1	PBS	25.33		7.96	0.401607		0.557354
		F2	Cyp26b1		25.55		8.18	0.344806
		F3	Cyp26b1		25.5		8.13	0.356965
		F4	Cyp26b1	2DG	25.72		8.81	0.222805
		F5	Cyp26b1		25.94		9.03	0.191293
		F6	Cyp26b1		25.87		8.96	0.200803
	4	A7	Ef1a	PBS	17.1	17.3533
		A8	Ef1a		17.64
		A9	Ef1a		17.32
		A10	Ef1a	2DG	16.93	17.1967
		A11	Ef1a		17.2
		A12	Ef1a		17.46
		F7	Cyp26b1	PBS	25.8		8.44667	0.286616		0.68302
		F8	Cyp26b1		25.62		8.26667	0.324702
		F9	Cyp26b1		25.5		8.14667	0.352865
		F10	Cyp26b1	2DG	26.11		8.91333	0.207405
		F11	Cyp26b1		26.02		8.82333	0.220756
		F12	Cyp26b1		25.97		8.77333	0.228541
	5	A1	Ef1a	PBS	16.68	16.7433
		A2	Ef1a		16.74
		A3	Ef1a		16.81
		A4	Ef1a	2DG	16.71	16.54
		A5	Ef1a		16.51
		A6	Ef1a		16.4
		F1	Cyp26b1	PBS	25.13		8.38667	0.298787		0.550953
		F2	Cyp26b1		25.02		8.27667	0.322459
		F3	Cyp26b1		25.13		8.38667	0.298787
		F4	Cyp26b1	2DG	25.71		9.17	0.173602
		F5	Cyp26b1		25.76		9.22	0.167689
		F6	Cyp26b1		25.78		9.24	0.16538
	6	A7	Ef1a	PBS	16.98	16.8567
		A8	Ef1a		16.76
		A9	Ef1a		16.83
		A10	Ef1a	2DG	16.47	16.56
		A11	Ef1a		16.58
		A12	Ef1a		16.63
		F7	Cyp26b1	PBS	25.65		8.79333	0.225394		0.668964
		F8	Cyp26b1		25.18		8.32333	0.312196
		F9	Cyp26b1		25.14		8.28333	0.320973
		F10	Cyp26b1	2DG	25.61		9.05	0.188659
		F11	Cyp26b1		25.73		9.17	0.173602
		F12	Cyp26b1		25.48		8.92	0.206449
	9	A1	Ef1a	PBS	17.54	17.47
		A2	Ef1a		17.37
		A3	Ef1a		17.5
		A4	Ef1a	2DG	17.14	17.1633
		A5	Ef1a		17.22
		A6	Ef1a		17.13
		F1	Cyp26b1	PBS	25.83		8.36	0.304361		0.705475
		F2	Cyp26b1		25.75		8.28	0.321715
		F3	Cyp26b1		25.51		8.04	0.379943
		F4	Cyp26b1	2DG	25.84		8.67667	0.244379
		F5	Cyp26b1		25.97		8.80667	0.223321
		F6	Cyp26b1		25.87		8.70667	0.239349
	10	A7	Ef1a	PBS	17.34	17.4233
		A8	Ef1a		17.56
		A9	Ef1a		17.37
		A10	Ef1a	2DG	17.02	17.1367
		A11	Ef1a		17.06
		A12	Ef1a		17.33
		F7	Cyp26b1	PBS	25.45		8.02667	0.383471		0.50581
		F8	Cyp26b1		25.39		7.96667	0.399755
		F9	Cyp26b1		25.49		8.06667	0.372985
		F10	Cyp26b1	2DG	26.12		8.98333	0.197582
		F11	Cyp26b1		26.16		9.02333	0.192179
		F12	Cyp26b1		26.14		9.00333	0.194862
	11	A1	Ef1a	PBS	17.88	17.8033
		A2	Ef1a		17.77
		A3	Ef1a		17.76
		A4	Ef1a	2DG	17.63	17.48
		A5	Ef1a		17.43
		A6	Ef1a		17.38
		F1	Cyp26b1	PBS	26.32		8.51667	0.273041		0.882703
		F2	Cyp26b1		26.38		8.57667	0.261918
		F3	Cyp26b1		26.28		8.47667	0.280717
		F4	Cyp26b1	2DG	25.93		8.45	0.285954
		F5	Cyp26b1		26.6		9.12	0.179724
		F6	Cyp26b1		26.02		8.54	0.268661
	12	A7	Ef1a	PBS	17.71	17.7167
		A8	Ef1a		17.69
		A9	Ef1a		17.75
		A10	Ef1a	2DG	17.72	17.6067
		A11	Ef1a		17.44
		A12	Ef1a		17.66
		F7	Cyp26b1	PBS	25.97		8.25333	0.327717		0.768438
		F8	Cyp26b1		25.75		8.03333	0.381703
		F9	Cyp26b1		25.75		8.03333	0.381703
		F10	Cyp26b1	2DG	26.05		8.44333	0.287279
		F11	Cyp26b1		26.09		8.48333	0.279423
		F12	Cyp26b1		26.14		8.53333	0.269905
	13	A1	Ef1a	PBS	16.77	16.64
		A2	Ef1a		16.46
		A3	Ef1a		16.69
		A4	Ef1a	2DG	16.74	16.6633
		A5	Ef1a		16.45
		A6	Ef1a		16.8
		F1	Cyp26b1	PBS	24.89		8.25	0.328475		0.44648
		F2	Cyp26b1		24.8		8.16	0.349619
		F3	Cyp26b1		24.71		8.07	0.372124
		F4	Cyp26b1	2DG	25.87		9.20667	0.169246
		F5	Cyp26b1		26.25		9.58667	0.130055
		F6	Cyp26b1		25.84		9.17667	0.172802
										Fig4C
	Biological Replicate (internal reference)	Position	Gene Name	Sample Name	Cq values	Average Cq values House keeping gene (ef1a)	dCq	Log2(-dCq)*100	geoMean	Relative Fold Change
bglap	1	A1	Ef1a	PBS	15.97	16.0833						Summary bglap relative fold change
		A2	Ef1a		16.19								PBS	2DG	Relative Fold Change
		A3	Ef1a		16.09							Biological Rep 1	0.0218008	0.0341301	1.56555
		A4	Ef1a	2DG	15.88	15.9167						Biological Rep 2	0.00722488	0.0176057	2.43682
		A5	Ef1a		15.85							Biological Rep 3	0.0124061	0.00620303	0.5
		A6	Ef1a		16.02							Biological Rep 4	0.00781533	0.00542507	0.694157
		B1	bglap	PBS	28.4		12.3167	0.0196026	0.0218008	1.56555		Biological Rep 5	0.00810965	0.0393868	4.85678
		B2	bglap		28.1		12.0167	0.0241336				Biological Rep 6	0.0107503	0.0392052	3.64689
		B3	bglap		28.24		12.1567	0.0219017				Biological Rep 7	0.0426057	0.107112	2.51403
		B4	bglap	2DG	27.47		11.5533	0.0332736	0.0341301			Biological Rep 9	0.107112	0.155738	1.45397
		B5	bglap		27.41		11.4933	0.0346866				Biological Rep 10	0.211763	0.250669	1.18372
		B6	bglap		27.42		11.5033	0.034447				Biological Rep 13	0.0219524	0.0448273	2.04202
	2	E1	Ef1a	PBS	17.2	16.9833
		E2	Ef1a		17.03
		E3	Ef1a		16.72
		G1	Ef1a	2DG	16.84	16.8233
		G2	Ef1a		16.69
		G3	Ef1a		16.94
		F1	bglap	PBS	30.78		13.7967	0.00702732	0.00722488	2.43682
		F2	bglap		31.01		14.0267	0.00599173
		F3	bglap		30.7		13.7167	0.007428
		H1	bglap	2DG	29.38		12.5567	0.0165984	0.0176057
		H2	bglap		29.67		12.8467	0.0135759
		H3	bglap		29.21		12.3867	0.0186742
	3	A1	Ef1a	PBS	16.55	16.4633
		A2	Ef1a		16.42
		A3	Ef1a		16.42
		A4	Ef1a	2DG	16.33	16.1
		A5	Ef1a		15.99
		A6	Ef1a		15.98
		B1	bglap	PBS	29.43		12.9667	0.0124924	0.0124061	0.5
		B2	bglap		29.18		12.7167	0.014856
		B3	bglap		29.71		13.2467	0.0102886
		B4	bglap	2DG	29.94		13.84	0.00681938	0.00620303
		B5	bglap		30.31		14.21	0.00527672
		B6	bglap		29.98		13.88	0.0066329
	4	E4	Ef1a	PBS	16.59	16.95
		E5	Ef1a		17.05
		E6	Ef1a		17.21
		G4	Ef1a	2DG	17.29	17.14
		G5	Ef1a		17.19
		G6	Ef1a		16.94
		F4	bglap	PBS	30.49		13.54	0.00839564	0.00781533	0.694157
		F5	bglap		30.67		13.72	0.00741086
		F6	bglap		30.62		13.67	0.0076722
		H4	bglap	2DG	30.99		13.85	0.00677227	0.00542507
		H5	bglap		31.48		14.34	0.00482203
		H6	bglap		31.46		14.32	0.00488934
	5	A1	Ef1a	PBS	16.41	16.2333
		A2	Ef1a		16.33
		A3	Ef1a		15.96
		A7	Ef1a	2DG	16.23	15.9833
		A8	Ef1a		16.08
		A9	Ef1a		15.64
		C1	bglap	PBS	29.79		13.5567	0.00829921	0.00810965	4.85678
		C2	bglap		29.72		13.4867	0.00871182
		C3	bglap		29.96		13.7267	0.00737669
		C7	bglap	2DG	27.38		11.3967	0.0370904	0.0393868
		C8	bglap		27.28		11.2967	0.0397525
		C9	bglap		27.22		11.2367	0.0414406
	6	A1	Ef1a	PBS	16.8	16.71
		A2	Ef1a		16.6
		A3	Ef1a		16.73
		A7	Ef1a	2DG	16.23	16.1467
		A8	Ef1a		16.17
		A9	Ef1a		16.04
		B1	bglap	PBS	29.81		13.1	0.0113896	0.0107503	3.64689
		B2	bglap		29.97		13.26	0.0101939
		B3	bglap		29.9		13.19	0.0107008
		B7	bglap	2DG	27.61		11.4633	0.0354155	0.0392052
		B8	bglap		27.55		11.4033	0.0369194
		B9	bglap		27.23		11.0833	0.0460876
	7	A1	Ef1a	PBS	16.57	16.55
		A2	Ef1a		16.48
		A3	Ef1a		16.6
		A7	Ef1a	2DG	17.06	16.9567
		A8	Ef1a		16.81
		A9	Ef1a		17
		B1	bglap	PBS	27.57		11.02	0.0481559	0.0426057	2.51403
		B2	bglap		27.82		11.27	0.0404941
		B3	bglap		27.85		11.3	0.0396608
		B7	bglap	2DG	26.81		9.85333	0.108106	0.107112
		B8	bglap		26.77		9.81333	0.111146
		B9	bglap		26.89		9.93333	0.102275
	9	E10	Ef1a	PBS	16.32	16.7467
		E11	Ef1a		17.22
		E12	Ef1a		16.7
		G10	Ef1a	2DG	16.9	16.88
		G11	Ef1a		16.84
		G12	Ef1a		16.9
		F10	bglap	PBS	26.68		9.93333	0.102275	0.107112	1.45397
		F11	bglap		26.7		9.95333	0.100867
		F12	bglap		26.46		9.71333	0.119123
		H10	bglap	2DG	26.17		9.29	0.159746	0.155738
		H11	bglap		26.39		9.51	0.137153
		H12	bglap		26.06		9.18	0.172403
	10	A1	Ef1a	PBS	15.51	15.9867
		A2	Ef1a		16.2
		A3	Ef1a		16.25
		A7	Ef1a	2DG	15.89	15.9567
		A8	Ef1a		16.09
		A9	Ef1a		15.89
		B1	bglap	PBS	24.82		8.83333	0.219231	0.211763	1.18372
		B2	bglap		24.83		8.84333	0.217717
		B3	bglap		24.96		8.97333	0.198956
		B7	bglap	2DG	24.6		8.64333	0.250091	0.250669
		B8	bglap		24.57		8.61333	0.255346
		B9	bglap		24.62		8.66333	0.246648
	13	A7	Ef1a	PBS	17.14	17.01
		A8	Ef1a		17.06
		A9	Ef1a		16.83
		A10	Ef1a	2DG	17.36	17.3033
		A11	Ef1a		17.22
		A12	Ef1a		17.33
		B7	bglap	PBS	29.11		12.1	0.0227791	0.0219524	2.04202
		B8	bglap		29.35		12.34	0.0192881
		B9	bglap		29.03		12.02	0.0240779
		B10	bglap	2DG	28.42		11.1167	0.045035	0.0448273
		B11	bglap		28.43		11.1267	0.0447239
		B12	bglap		28.43		11.1267	0.0447239
										Fig4C
	Biological Replicate (internal reference)	Position	Gene Name	Sample Name	Cq values	Average Cq values House keeping gene (ef1a)	dCq	Log2(-dCq)*100	geoMean	Relative Fold Change
bglapl	2	A7	Ef1a	PBS	16.31	16.24						Summary bglapl relative fold change
		A8	Ef1a		16.19								PBS	2DG	Relative Fold Change
		A9	Ef1a		16.22							Biological Rep 2	0.0012567	0.00061613	0.490276
		A10	Ef1a	2DG	15.84	15.8667						Biological Rep 3	0.000579537	0.000437182	0.754364
		A11	Ef1a		15.88							Biological Rep 4	0.000740364	0.000399511	0.539614
		A12	Ef1a		15.88							Biological Rep 5	0.000670344	0.00065959	0.983957
		C7	bglapl	PBS	32.33		16.09	0.0014336	0.0012567	0.490276		Biological Rep 6	0.000930648	0.000807373	0.867539
		C8	bglapl		32.33		16.09	0.0014336				Biological Rep 7	0.00112868	0.00174268	1.54399
		C9	bglapl		32.9		16.66	0.000965696				Biological Rep 9	0.00346929	0.00556471	1.60399
		C10	bglapl	2DG	33.03		17.1633	0.000681274	0.00061613			Biological Rep 10	0.00385387	0.00375715	0.974905
		C11	bglapl		33.32		17.4533	0.000557215				Biological Rep 13	0.000713494	0.00169307	2.37293
		C12	bglapl		33.59		17.7233	0.00046211
	3	A1	Ef1a	PBS	16.55	16.4633
		A2	Ef1a		16.42
		A3	Ef1a		16.42
		A4	Ef1a	2DG	16.33	16.1
		A5	Ef1a		15.99
		A6	Ef1a		15.98
		C1	bglapl	PBS	33.86		17.3967	0.000579537	0.000579537	0.754364
		C2	bglapl		33.63		17.1667	0.000679702
		C3	bglapl		34.09		17.6267	0.000494134
		C4	bglapl	2DG	34.19		18.09	0.000358399	0.000437182
		C5	bglapl		33.52		17.42	0.00057024
		C6	bglapl		34		17.9	0.000408849
	4	A7	Ef1a	PBS	16.6	16.4433
		A8	Ef1a		16.44
		A9	Ef1a		16.29
		A10	Ef1a	2DG	16.33	16.3567
		A11	Ef1a		16.37
		A12	Ef1a		16.37
		C7	bglapl	PBS	34.01		17.5667	0.000515118	0.000740364	0.539614
		C8	bglapl		33.02		16.5767	0.00102312
		C9	bglapl		33.43		16.9867	0.000770023
		C10	bglapl	2DG	34.53		18.1733	0.000338284	0.000399511
		C11	bglapl		34.07		17.7133	0.000465324
		C12	bglapl		34.27		17.9133	0.000405088
	5	A1	Ef1a	PBS	16.41	16.2333
		A2	Ef1a		16.33
		A3	Ef1a		15.96
		A7	Ef1a	2DG	16.23	15.9833
		A8	Ef1a		16.08
		A9	Ef1a		15.64
		B1	bglapl	PBS	33.56		17.3267	0.00060835	0.000670344	0.983957
		B2	bglapl		33.54		17.3067	0.000616842
		B3	bglapl		33.16		16.9267	0.000802723
		B7	bglapl	2DG	33.22		17.2367	0.00064751	0.00065959
		B8	bglapl		33.24		17.2567	0.000638595
		B9	bglapl		33.12		17.1367	0.000693984
	6	A1	Ef1a	PBS	16.8	16.71
		A2	Ef1a		16.6
		A3	Ef1a		16.73
		A7	Ef1a	2DG	16.23	16.1467
		A8	Ef1a		16.17
		A9	Ef1a		16.04
		C1	bglapl	PBS	33.47		16.76	0.000901026	0.000930648	0.867539
		C2	bglapl		33.71		17	0.000762939
		C3	bglapl		33.09		16.38	0.00117254
		C7	bglapl	2DG	33.19		17.0433	0.000740364	0.000807373
		C8	bglapl		32.94		16.7933	0.000880446
		C9	bglapl		33.44		17.2933	0.00062257
	7	A1	Ef1a	PBS	16.57	16.55
		A2	Ef1a		16.48
		A3	Ef1a		16.6
		A7	Ef1a	2DG	17.06	16.9567
		A8	Ef1a		16.81
		A9	Ef1a		17
		C1	bglapl	PBS	33.53		16.98	0.00077359	0.00112868	1.54399
		C2	bglapl		32.97		16.42	0.00114048
		C3	bglapl		33		16.45	0.00111701
		C7	bglapl	2DG	32.91		15.9533	0.00157604	0.00174268
		C8	bglapl		32.62		15.6633	0.00192693
		C9	bglapl		33.6		16.6433	0.000976916
	9	A1	Ef1a	PBS	16.51	16.355
		A2	Ef1a		16.4
		A3	Ef1a		16.31
		A7	Ef1a	2DG	16.61	16.46
		A8	Ef1a		16.05
		A9	Ef1a		16.31
		C1	bglapl	PBS	31.3		14.945	0.00317035	0.00346929	1.60399
		C2	bglapl		30.9		14.545	0.0041833
		C3	bglapl		31.31		14.955	0.00314845
		C7	bglapl	2DG	30.75		14.29	0.00499208	0.00556471
		C8	bglapl		30.84		14.38	0.00469017
		C9	bglapl		30.19		13.73	0.00735967
	10	A1	Ef1a	PBS	15.51	15.9867
		A2	Ef1a		16.2
		A3	Ef1a		16.25
		A7	Ef1a	2DG	15.89	15.9567
		A8	Ef1a		16.09
		A9	Ef1a		15.89
		C1	bglapl	PBS	30.46		14.4733	0.00439635	0.00385387	0.974905
		C2	bglapl		30.7		14.7133	0.00372259
		C3	bglapl		30.79		14.8033	0.00349746
		C7	bglapl	2DG	30.72		14.7633	0.00359579	0.00375715
		C8	bglapl		30.5		14.5433	0.00418813
		C9	bglapl		30.75		14.7933	0.00352179
	13	A7	Ef1a	PBS	17.14	17.01
		A8	Ef1a		17.06
		A9	Ef1a		16.83
		A10	Ef1a	2DG	17.36	17.3033
		A11	Ef1a		17.22
		A12	Ef1a		17.33
		C7	bglapl	PBS	33.77		16.76	0.000901026	0.000713494	2.37293
		C8	bglapl		33.88		16.87	0.00083488
		C9	bglapl		34.67		17.66	0.000482848
		C10	bglapl	2DG	33.33		16.0267	0.00149793	0.00169307
		C11	bglapl		33.19		15.8867	0.00165058
		C12	bglapl		32.94		15.6367	0.00196288
										Fig4C
	Biological Replicate (internal reference)	Position	Gene Name	Sample Name	Cq values	Average Cq values House keeping gene (ef1a)	dCq	Log2(-dCq)*100	geoMean	Relative Fold Change
runx2a	1	A1	Ef1a	PBS	15.97	16.0833						Summary runx2a relative fold change
		A2	Ef1a		16.19								PBS	2DG	Relative Fold Change
		A3	Ef1a		16.09							Biological Rep 1	1.30793	0.678548	0.518797
		A4	Ef1a	2DG	15.88	15.9167						Biological Rep 2	1.54455	0.680118	0.440333
		A5	Ef1a		15.85							Biological Rep 3	1.20904	0.80136	0.66281
		A6	Ef1a		16.02							Biological Rep 4	1.15978	0.669206	0.577009
		G1	runx2a	PBS	22.34		6.25667	1.30784	1.30793	0.518797		Biological Rep 5	0.416731	0.423526	1.0163
		G2	runx2a		22.32		6.23667	1.3261				Biological Rep 6	1.68046	1.22308	0.727827
		G3	runx2a		22.36		6.27667	1.28984				Biological Rep 7	1.33687	1.64778	1.23257
		G4	runx2a	2DG	23.14		7.22333	0.669206	0.678548			Biological Rep 11	0.712283	0.607318	0.852635
		G5	runx2a		23.14		7.22333	0.669206				Biological Rep 13	1.08212	0.883023	0.816014
		G6	runx2a		23.08		7.16333	0.697625
	2	A7	Ef1a	PBS	16.31	16.24
		A8	Ef1a		16.19
		A9	Ef1a		16.22
		A10	Ef1a	2DG	15.84	15.8667
		A11	Ef1a		15.88
		A12	Ef1a		15.88
		G7	runx2a	PBS	22.26		6.02	1.54099	1.54455	0.440333
		G8	runx2a		22.29		6.05	1.50928
		G9	runx2a		22.22		5.98	1.58431
		G10	runx2a	2DG	22.85		6.98333	0.790328	0.680118
		G11	runx2a		22.95		7.08333	0.737402
		G12	runx2a		23.4		7.53333	0.53981
	3	A1	Ef1a	PBS	16.55	16.4633
		A2	Ef1a		16.42
		A3	Ef1a		16.42
		A4	Ef1a	2DG	16.33	16.1
		A5	Ef1a		15.99
		A6	Ef1a		15.98
		G1	runx2a	PBS	22.85		6.38667	1.19515	1.20904	0.66281
		G2	runx2a		22.86		6.39667	1.18689
		G3	runx2a		22.79		6.32667	1.2459
		G4	runx2a	2DG	23.17		7.07	0.744248	0.80136
		G5	runx2a		22.94		6.84	0.872881
		G6	runx2a		23.08		6.98	0.792156
	4	A7	Ef1a	PBS	16.6	16.4433
		A8	Ef1a		16.44
		A9	Ef1a		16.29
		A10	Ef1a	2DG	16.33	16.3567
		A11	Ef1a		16.37
		A12	Ef1a		16.37
		G7	runx2a	PBS	22.88		6.43667	1.15444	1.15978	0.577009
		G8	runx2a		22.94		6.49667	1.10741
		G9	runx2a		22.8		6.35667	1.22026
		G10	runx2a	2DG	23.48		7.12333	0.717238	0.669206
		G11	runx2a		23.53		7.17333	0.692806
		G12	runx2a		23.73		7.37333	0.603122
	5	A1	Ef1a	PBS	16.41	16.2333
		A2	Ef1a		16.33
		A3	Ef1a		15.96
		A7	Ef1a	2DG	16.23	15.9833
		A8	Ef1a		16.08
		A9	Ef1a		15.64
		H1	runx2a	PBS	24.28		8.04667	0.378192	0.416731	1.0163
		H2	runx2a		23.87		7.63667	0.502498
		H3	runx2a		24.27		8.03667	0.380822
		H7	runx2a	2DG	23.81		7.82667	0.440493	0.423526
		H8	runx2a		23.89		7.90667	0.416731
		H9	runx2a		23.9		7.91667	0.413853
	6	A1	Ef1a	PBS	16.8	16.71
		A2	Ef1a		16.6
		A3	Ef1a		16.73
		A7	Ef1a	2DG	16.23	16.1467
		A8	Ef1a		16.17
		A9	Ef1a		16.04
		H1	runx2a	PBS	22.72		6.01	1.55171	1.68046	0.727827
		H2	runx2a		22.57		5.86	1.72173
		H3	runx2a		22.64		5.93	1.64018
		H7	runx2a	2DG	22.55		6.40333	1.18142	1.22308
		H8	runx2a		22.45		6.30333	1.26622
		H9	runx2a		22.28		6.13333	1.42457
						16.55
	7	A1	Ef1a	PBS	16.57
		A2	Ef1a		16.48
		A3	Ef1a		16.6
		A7	Ef1a	2DG	17.06	16.9567
		A8	Ef1a		16.81
		A9	Ef1a		17
		H1	runx2a	PBS	22.92		6.37	1.20904	1.33687	1.23257
		H2	runx2a		22.68		6.13	1.42786
		H3	runx2a		22.87		6.32	1.25167
		H7	runx2a	2DG	22.81		5.85333	1.7297	1.64778
		H8	runx2a		22.95		5.99333	1.56974
		H9	runx2a		22.68		5.72333	1.8928
	11	A1	Ef1a	PBS	17.39	17.33
		A2	Ef1a		17.39
		A3	Ef1a		17.21
		A4	Ef1a	2DG	17.09	17.04
		A5	Ef1a		17.03
		A6	Ef1a		17
		E1	runx2a	PBS	24.26		6.93	0.820091	0.712283	0.852635
		E2	runx2a		24.54		7.21	0.67542
		E3	runx2a		24.59		7.26	0.652412
		E4	runx2a	2DG	24.36		7.32	0.625836	0.607318
		E5	runx2a		24.38		7.34	0.61722
		E6	runx2a		24.47		7.43	0.579892
	13	A7	Ef1a	PBS	17.14	17.01
		A8	Ef1a		17.06
		A9	Ef1a		16.83
		A10	Ef1a	2DG	17.36	17.3033
		A11	Ef1a		17.22
		A12	Ef1a		17.33
		E7	runx2a	PBS	23.61		6.6	1.03087	1.08212	0.816014
		E8	runx2a		23.49		6.48	1.12028
		E9	runx2a		23.52		6.51	1.09722
		E10	runx2a	2DG	24.17		6.86667	0.856895	0.883023
		E11	runx2a		24.05		6.74667	0.931217
		E12	runx2a		24.16		6.85667	0.862855
										Fig4C
	Biological Replicate (internal reference)	Position	Gene Name	Sample Name	Cq values	Average Cq values House keeping gene (ef1a)	dCq	Log2(-dCq)*100	geoMean	Relative Fold Change
runx2b	1	A1	Ef1a	PBS	15.97	16.0833						Summary runx2b relative fold change
		A2	Ef1a		16.19								PBS	2DG	Relative Fold Change
		A3	Ef1a		16.09							Biological Rep 1	0.106865	0.068894	0.644685
		A4	Ef1a	2DG	15.88	15.9167						Biological Rep 2	0.130355	0.0685764	0.526072
		A5	Ef1a		15.85							Biological Rep 3	0.151129	0.0719858	0.476319
		A6	Ef1a		16.02							Biological Rep 4	0.0954258	0.0821188	0.860551
		H1	runx2b	PBS	25.75		9.66667	0.123039	0.106865	0.644685		Biological Rep 5	0.0773309	0.0759147	0.981686
		H2	runx2b		26.1		10.0167	0.0965346				Biological Rep 6	0.204078	0.138746	0.679871
		H3	runx2b		26.01		9.92667	0.102749				Biological Rep 7	0.284965	0.224874	0.789129
		H4	runx2b	2DG	26.37		10.4533	0.0713236	0.068894			Biological Rep 11	0.101568	0.0504334	0.496546
		H5	runx2b		26.46		10.5433	0.0670101				Biological Rep 13	0.106126	0.0906964	0.854607
		H6	runx2b		26.43		10.5133	0.0684181
	2	A7	Ef1a	PBS	16.31	16.24
		A8	Ef1a		16.19
		A9	Ef1a		16.22
		A10	Ef1a	2DG	15.84	15.8667
		A11	Ef1a		15.88
		A12	Ef1a		15.88
		H7	runx2b	PBS	25.67		9.43	0.144973	0.130355	0.526072
		H8	runx2b		26.03		9.79	0.112958
		H9	runx2b		25.77		9.53	0.135265
		H10	runx2b	2DG	26.18		10.3133	0.0785918	0.0685764
		H11	runx2b		26.37		10.5033	0.068894
		H12	runx2b		26.58		10.7133	0.0595615
	3	A1	Ef1a	PBS	16.55	16.4633
		A2	Ef1a		16.42
		A3	Ef1a		16.42
		A4	Ef1a	2DG	16.33	16.1
		A5	Ef1a		15.99
		A6	Ef1a		15.98
		H1	runx2b	PBS	25.86		9.39667	0.148362	0.151129	0.476319
		H2	runx2b		25.75		9.28667	0.160116
		H3	runx2b		25.89		9.42667	0.145308
		H4	runx2b	2DG	26.42		10.32	0.0782295	0.0719858
		H5	runx2b		26.66		10.56	0.0662404
		H6	runx2b		No amplification		#VALUE!	#VALUE!
	4	A7	Ef1a	PBS	16.6	16.4433
		A8	Ef1a		16.44
		A9	Ef1a		16.29
		A10	Ef1a	2DG	16.33	16.3567
		A11	Ef1a		16.37
		A12	Ef1a		16.37
		H7	runx2b	PBS	25.6		9.15667	0.175214	0.0954258	0.860551
		H8	runx2b		26.38		9.93667	0.102039
		H9	runx2b		27.45		11.0067	0.048603
		H10	runx2b	2DG	26.75		10.3933	0.0743524	0.0821188
		H11	runx2b		26.7		10.3433	0.0769744
		H12	runx2b		26.37		10.0133	0.0967579
	5	A1	Ef1a	PBS	16.41	16.2333
		A2	Ef1a		16.33
		A3	Ef1a		15.96
		A7	Ef1a	2DG	16.23	15.9833
		A8	Ef1a		16.08
		A9	Ef1a		15.64
		A4	runx2b	PBS	26.43		10.1967	0.0852114	0.0773309	0.981686
		A5	runx2b		26.64		10.4067	0.0736684
		A6	runx2b		26.64		10.4067	0.0736684
		A10	runx2b	2DG	26.29		10.3067	0.0789558	0.0759147
		A11	runx2b		26.37		10.3867	0.0746968
		A12	runx2b		26.38		10.3967	0.0741808
	6	A1	Ef1a	PBS	16.8	16.71
		A2	Ef1a		16.6
		A3	Ef1a		16.73
		A7	Ef1a	2DG	16.23	16.1467
		A8	Ef1a		16.17
		A9	Ef1a		16.04
		A4	runx2b	PBS	25.66		8.95	0.2022	0.204078	0.679871
		A5	runx2b		25.66		8.95	0.2022
		A6	runx2b		25.62		8.91	0.207885
		A10	runx2b	2DG	25.58		9.43333	0.144638	0.138746
		A11	runx2b		25.71		9.56333	0.132175
		A12	runx2b		25.63		9.48333	0.139712
	7	A1	Ef1a	PBS	16.57	16.55
		A2	Ef1a		16.48
		A3	Ef1a		16.6
		A7	Ef1a	2DG	17.06	16.9567
		A8	Ef1a		16.81
		A9	Ef1a		17
		A4	runx2b	PBS	25.02		8.47	0.282017	0.284965	0.789129
		A5	runx2b		24.99		8.44	0.287943
		A6	runx2b		25.17		8.62	0.254168
		A10	runx2b	2DG	25.73		8.77333	0.228541	0.224874
		A11	runx2b		25.6		8.64333	0.250091
		A12	runx2b		25.93		8.97333	0.198956
	11	A1	Ef1a	PBS	17.39	17.33
		A2	Ef1a		17.39
		A3	Ef1a		17.21
		A4	Ef1a	2DG	17.09	17.04
		A5	Ef1a		17.03
		A6	Ef1a		17
		F1	runx2b	PBS	27.18		9.85	0.108356	0.101568	0.496546
		F2	runx2b		27.16		9.83	0.109869
		F3	runx2b		27.48		10.15	0.0880127
		F4	runx2b	2DG	27.8		10.76	0.0576657	0.0504334
		F5	runx2b		27.68		10.64	0.0626673
		F6	runx2b		28.5		11.46	0.0354974
	13	A7	Ef1a	PBS	17.14	17.01
		A8	Ef1a		17.06
		A9	Ef1a		16.83
		A10	Ef1a	2DG	17.36	17.3033
		A11	Ef1a		17.22
		A12	Ef1a		17.33
		F7	runx2b	PBS	26.9		9.89	0.105393	0.106126	0.854607
		F8	runx2b		26.9		9.89	0.105393
		F9	runx2b		26.87		9.86	0.107608
		F10	runx2b	2DG	27.58		10.2767	0.0806149	0.0906964
		F11	runx2b		27.39		10.0867	0.0919625
		F12	runx2b		27.26		9.95667	0.100634

## Sheet: Fig4F and G
Control (PBS) for 2DG
						Fig4F PBS 0-12hpa Runx2+bglap+ Column	Fig4F PBS 0-12hpa Runx2+bglap- Column	Fig4G PBS 0-12hpa Runx2+bglap+ Column	Fig4G PBS 0-12hpa Runx2+bglap+ Column
Number of fish	Fin Cryosection Internal reference (File name)	Fin area	number of runx2+bglap+	number of runx2+bglap-	total OB (runx2+ and bglap+) number	Nº of runx2+bglap+ per 100um2	Nº of runx2+bglap- 100um2	% of runx2+bglap+	% of runx2+bglap+
HC#158_20 Experiment #1	24hpa PBS1x 40x 0.6 zoom a1	45850.8	51	31	82	11.123	6.76106	62.1951	37.8049
	24hpa PBS1x 40x 0.6 zoom b1	43886.6	40	21	61	9.11439	4.78506	65.5738	34.4262
	24hpa PBS1x 40x 0.6 zoom c1	44042.6	33	37	70	7.49275	8.40096	47.1429	52.8571
	24hpa PBS1x 40x 0.6 zoom d1	36839.9	28	36	64	7.60045	9.77201	43.75	56.25
	24hpa PBS1x 40x 0.6 zoom e1	47716.9	43	22	65	9.01148	4.61053	66.1538	33.8462
HC158_20 Experiment #2	24hpa Control PBS 40x 0.6 a1	40303.7	20	30	50	4.96232	7.44348	40	60
	24hpa Control PBS 40x 0.6 b1	44679.7	28	44	72	6.26682	9.84787	38.8889	61.1111
	24hpa Control PBS 40x 0.6 c1	42072.4	23	33	56	5.46676	7.84361	41.0714	58.9286
	24hpa Control PBS 40x 0.6 d1	41579.5	20	37	57	4.81006	8.89862	35.0877	64.9123
	24hpa Control PBS 40x 0.6 e1	45651.9	15	41	56	3.28574	8.98101	26.7857	73.2143
	24hpa Control PBS 40x 0.6 g1	40986.2	20	30	50	4.87969	7.31953	40	60
HC#159_20 Experiment #1	24hpa PBS1x 40x 0.6 zoom a1	33826.1	34	13	47	10.0514	3.84319	72.3404	27.6596
	24hpa PBS1x 40x 0.6 zoom b1	34629	45	21	66	12.9949	6.06428	68.1818	31.8182
	24hpa PBS1x 40x 0.6 zoom c1	40459.3	36	19	55	8.89783	4.69608	65.4545	34.5455
HC159_20 Experiment #2	24hpa Control PBS 40x 0.6 b1	42415.2	31	36	67	7.3087	8.48752	46.2687	53.7313
	24hpa Control PBS 40x 0.6 c1	48262	21	73	94	4.35125	15.1258	22.3404	77.6596
	24hpa Control PBS 40x 0.6 e1	51851.8	25	52	77	4.82144	10.0286	32.4675	67.5325
	24hpa Control PBS 40x 0.6 f1	52989.4	20	53	73	3.77434	10.002	27.3973	72.6027
	24hpa Control PBS 40x 0.6 g1	46833.3	21	42	63	4.48399	8.96797	33.3333	66.6667
HC#160_20 Experiment #1	24hpa PBS1x 40x 0.6 zoom a1	49348.6	35	16	51	7.0924	3.24224	68.6275	31.3725
	24hpa PBS1x 40x 0.6 zoom b1	48349	27	22	49	5.58439	4.55025	55.102	44.898
	24hpa PBS1x 40x 0.6 zoom c1	50177.8	45	35	80	8.9681	6.97519	56.25	43.75
	24hpa PBS1x 40x 0.6 zoom d1	48673.6	41	18	59	8.42346	3.6981	69.4915	30.5085
	24hpa PBS1x 40x 0.6 zoom e1	53746.8	40	22	62	7.4423	4.09326	64.5161	35.4839
	24hpa PBS1x 40x 0.6 zoom f1	52853.6	45	32	77	8.51409	6.05446	58.4416	41.5584
	24hpa PBS1x 40x 0.6 zoom g1	48898.4	52	21	73	10.6343	4.29462	71.2329	28.7671
HC160_20 Experiment #2	24hpa Control PBS 40x 0.6 a1	55688.4	38	38	76	6.82369	6.82369	50	50
	24hpa Control PBS 40x 0.6 b1	57431	32	44	76	5.5719	7.66137	42.1053	57.8947
	24hpa Control PBS 40x 0.6 d1	54778.9	26	30	56	4.74635	5.47656	46.4286	53.5714
	24hpa Control PBS 40x 0.6 e1	53250.2	24	25	49	4.50703	4.69482	48.9796	51.0204
	24hpa Control PBS 40x 0.6 f1	48287.5	29	30	59	6.00569	6.21279	49.1525	50.8475
HC#161_20 Experiment #1	24hpa PBS1x 40x 0.6 zoom a1	47409.1	31	43	74	6.53883	9.06999	41.8919	58.1081
	24hpa PBS1x 40x 0.6 zoom b1	45641.1	50	35	85	10.955	7.66853	58.8235	41.1765
	24hpa PBS1x 40x 0.6 zoom c1	42455.2	40	27	67	9.4217	6.35965	59.7015	40.2985
	24hpa PBS1x 40x 0.6 zoom d1	50556.6	37	43	80	7.31853	8.50532	46.25	53.75
	24hpa PBS1x 40x 0.6 zoom e1	51688.9	37	33	70	7.15821	6.38435	52.8571	47.1429
	24hpa PBS1x 40x 0.6 zoom f1	50495.8	47	31	78	9.3077	6.13912	60.2564	39.7436
	24hpa PBS1x 40x 0.6 zoom g1	49520.7	43	28	71	8.68324	5.6542	60.5634	39.4366
HC161_20 Experiment #2	24hpa Control PBS 40x 0.6 a1	43368.2	18	27	45	4.15051	6.22576	40	60
	24hpa Control PBS 40x 0.6 c1	48894.2	20	46	66	4.09047	9.40808	30.303	69.697
	24hpa Control PBS 40x 0.6 e1	56336.7	20	45	65	3.55009	7.98769	30.7692	69.2308
	24hpa Control PBS 40x 0.6 f1	51374.7	20	54	74	3.89297	10.511	27.027	72.973
	24hpa Control PBS 40x 0.6 g1	53773.7	28	53	81	5.20701	9.85613	34.5679	65.4321
HC#162_20 Experiment #1	24hpa PBS1x 40x 0.6 zoom a1	31965.6	36	27	63	11.2621	8.44659	57.1429	42.8571
HC162_20 Experiment #2	24hpa Control PBS 40x 0.6 a1	45819.1	35	37	72	7.63874	8.07524	48.6111	51.3889
	24hpa Control PBS 40x 0.6 b1	44330.2	33	40	73	7.44414	9.0232	45.2055	54.7945
	24hpa Control PBS 40x 0.6 c1	43031.1	28	42	70	6.50693	9.76039	40	60
	24hpa Control PBS 40x 0.6 e1	45395.5	16	43	59	3.52458	9.4723	27.1186	72.8814
	24hpa Control PBS 40x 0.6 f1	37192.8	25	31	56	6.72172	8.33494	44.6429	55.3571
	24hpa Control PBS 40x 0.6 g1	41803.6	18	35	53	4.30584	8.37248	33.9623	66.0377
HC207_21 Experiment #3	24hpa OcsGFP488 Runx647 PBS1x 40x 0.6 zoom a1	61938.6	50	69	119	8.07252	11.1401	42.0168	57.9832
	24hpa OcsGFP488 Runx647 PBS1x 40x 0.6 zoom b1	62102.1	52	48	100	8.37331	7.72921	52	48
	24hpa OcsGFP488 Runx647 PBS1x 40x 0.6 zoom c1	63792.9	47	48	95	7.36759	7.52435	49.4737	50.5263
	24hpa OcsGFP488 Runx647 PBS1x 40x 0.6 zoom d1	64033.2	54	45	99	8.43313	7.02761	54.5455	45.4545
	24hpa OcsGFP488 Runx647 PBS1x 40x 0.6 zoom e1	58291.1	41	45	86	7.03366	7.71988	47.6744	52.3256
	24hpa OcsGFP488 Runx647 PBS1x 40x 0.6 zoom f1	56963.2	33	33	66	5.79321	5.79321	50	50
	24hpa OcsGFP488 Runx647 PBS1x 40x 0.6 zoom g1	57849.4	27	49	76	4.66729	8.47027	35.5263	64.4737
	24hpa OcsGFP488 Runx647 PBS1x 40x 0.6 zoom h1	54202.3	35	32	67	6.45729	5.90381	52.2388	47.7612
	24hpa OcsGFP488 Runx647 PBS1x 40x 0.6 zoom i1	55301.8	38	34	72	6.87139	6.14808	52.7778	47.2222
HC208_21 Experiment #3	24hpa OcsGFP488 Runx647 PBS1x 40x 0.6 zoom a1	60239.7	35	44	79	5.81012	7.30415	44.3038	55.6962
	24hpa OcsGFP488 Runx647 PBS1x 40x 0.6 zoom b1	60187.7	45	39	84	7.47661	6.47973	53.5714	46.4286
	24hpa OcsGFP488 Runx647 PBS1x 40x 0.6 zoom c1	67853.5	46	53	99	6.77931	7.81094	46.4646	53.5354
	24hpa OcsGFP488 Runx647 PBS1x 40x 0.6 zoom d1	63461.2	35	40	75	5.51518	6.30306	46.6667	53.3333
HC209_21 Experiment #3	24hpa OcsGFP488 Runx647 PBS1x 40x 0.6 zoom a1	37800.7	36	52	88	9.52363	13.7564	40.9091	59.0909
	24hpa OcsGFP488 Runx647 PBS1x 40x 0.6 zoom b1	37153	37	56	93	9.95881	15.0728	39.7849	60.2151
	24hpa OcsGFP488 Runx647 PBS1x 40x 0.6 zoom c1	35460.6	32	49	81	9.02409	13.8181	39.5062	60.4938
	24hpa OcsGFP488 Runx647 PBS1x 40x 0.6 zoom d1	29364.1	34	25	59	11.5788	8.51379	57.6271	42.3729
HC210_21 Experiment #3	24hpa OcsGFP488 Runx647 PBS1x 40x 0.6 zoom a1	57533.6	28	39	67	4.86672	6.77864	41.791	58.209
	24hpa OcsGFP488 Runx647 PBS1x 40x 0.6 zoom b1	53587.4	31	46	77	5.78494	8.5841	40.2597	59.7403
	24hpa OcsGFP488 Runx647 PBS1x 40x 0.6 zoom c1	54783.7	28	42	70	5.11101	7.66651	40	60
	24hpa OcsGFP488 Runx647 PBS1x 40x 0.6 zoom d1	56931.4	17	70	87	2.98605	12.2955	19.5402	80.4598
	24hpa OcsGFP488 Runx647 PBS1x 40x 0.6 zoom e1	51731.6	29	51	80	5.60586	9.85858	36.25	63.75
	24hpa OcsGFP488 Runx647 PBS1x 40x 0.6 zoom f1	50039.4	40	43	83	7.9937	8.59323	48.1928	51.8072
HC211_21 Experiment #3	24hpa OcsGFP488 Runx647 PBS1x 40x 0.6 zoom a1	58678.9	38	55	93	6.47592	9.37305	40.8602	59.1398
	24hpa OcsGFP488 Runx647 PBS1x 40x 0.6 zoom b1	50422.8	50	43	93	9.91615	8.52789	53.7634	46.2366
	24hpa OcsGFP488 Runx647 PBS1x 40x 0.6 zoom c1	56646	27	39	66	4.76644	6.88486	40.9091	59.0909
	24hpa OcsGFP488 Runx647 PBS1x 40x 0.6 zoom d1	55182.6	46	44	90	8.33596	7.97353	51.1111	48.8889
	24hpa OcsGFP488 Runx647 PBS1x 40x 0.6 zoom e1	53936.5	34	48	82	6.30371	8.89936	41.4634	58.5366
	24hpa OcsGFP488 Runx647 PBS1x 40x 0.6 zoom f1	55667.5	20	63	83	3.59276	11.3172	24.0964	75.9036
	24hpa OcsGFP488 Runx647 PBS1x 40x 0.6 zoom g1	56872.4	30	42	72	5.27497	7.38496	41.6667	58.3333
2DG Condition
						Fig4F 2DG 0-12hpa Runx2+bglap+ Column	Fig4F 2DG 0-12hpa Runx2+bglap- Column	Fig4G 2DG 0-12hpa Runx2+bglap+ Column	Fig4G 2DG 0-12hpa Runx2+bglap+ Column
Number of fish	Fin Cryosection Internal reference (File name)	Fin area	number of runx2+bglap+	number of runx2+bglap-	total OB (runx2+ and bglap+) number	Nº of runx2+bglap+ per 100um2	Nº of runx2+bglap- 100um2	% of runx2+bglap+	% of runx2+bglap+
HC#163_20 Experiment #1	24hpa 2DG0.5mg 40x 0.6 zoom a1	48323.2	44	19	63	9.10536	3.93186	69.8413	30.1587
	24hpa 2DG0.5mg 40x 0.6 zoom b1	51177.1	36	24	60	7.03439	4.68959	60	40
	24hpa 2DG0.5mg 40x 0.6 zoom c1	52103.6	37	21	58	7.10124	4.03044	63.7931	36.2069
	24hpa 2DG0.5mg 40x 0.6 zoom d1	52109.5	33	6	39	6.33281	1.15142	84.6154	15.3846
	24hpa 2DG0.5mg 40x 0.6 zoom e1	48516.7	33	15	48	6.80178	3.09172	68.75	31.25
	24hpa 2DG0.5mg 40x 0.6 zoom f1	51148.6	45	22	67	8.79789	4.30119	67.1642	32.8358
	24hpa 2DG0.5mg 40x 0.6 zoom g1	46640.3	25	14	39	5.36017	3.0017	64.1026	35.8974
HC163_20 Experiment #2	24hpa 2DG 0.5mg 40x 0.6 b1	43243	30	28	58	6.93754	6.47504	51.7241	48.2759
	24hpa 2DG 0.5mg 40x 0.6 c1	43059.5	27	19	46	6.27039	4.41249	58.6957	41.3043
	24hpa 2DG 0.5mg 40x 0.6 e1	46593.8	28	14	42	6.00938	3.00469	66.6667	33.3333
	24hpa 2DG 0.5mg 40x 0.6 f1	42021.2	25	15	40	5.94938	3.56963	62.5	37.5
	24hpa 2DG 0.5mg 40x 0.6 g1	42325	24	19	43	5.67041	4.48908	55.814	44.186
	24hpa 2DG 0.5mg 40x 0.6 h1	46429.5	29	28	57	6.24602	6.03064	50.8772	49.1228
HC#164_20 Experiment #1	24hpa 2DG0.5mg 40x 0.6 zoom a1	47621.6	46	20	66	9.65947	4.19977	69.697	30.303
	24hpa 2DG0.5mg 40x 0.6 zoom b1	51338.8	44	19	63	8.57051	3.7009	69.8413	30.1587
	24hpa 2DG0.5mg 40x 0.6 zoom c1	50243.3	42	19	61	8.35933	3.7816	68.8525	31.1475
	24hpa 2DG0.5mg 40x 0.6 zoom d1	54376	46	25	71	8.45962	4.59762	64.7887	35.2113
	24hpa 2DG0.5mg 40x 0.6 zoom e1	51430.8	48	11	59	9.33292	2.13879	81.3559	18.6441
	24hpa 2DG0.5mg 40x 0.6 zoom f1	52113.1	37	15	52	7.09994	2.87835	71.1538	28.8462
HC164_20 Experiment #2	24hpa 2DG 0.5mg 40x 0.6 a1	52293.1	23	32	55	4.39828	6.11935	41.8182	58.1818
	24hpa 2DG 0.5mg 40x 0.6 b1	48818.1	24	24	48	4.91621	4.91621	50	50
	24hpa 2DG 0.5mg 40x 0.6 c1	61910.4	22	32	54	3.55352	5.16876	40.7407	59.2593
	24hpa 2DG 0.5mg 40x 0.6 e1	52853.9	26	26	52	4.91922	4.91922	50	50
	24hpa 2DG 0.5mg 40x 0.6 f1	58404.4	18	23	41	3.08196	3.93806	43.9024	56.0976
HC#165_20 Experiment #1	24hpa 2DG0.5mg 40x 0.6 zoom a1	39500.2	39	11	50	9.87336	2.78479	78	22
	24hpa 2DG0.5mg 40x 0.6 zoom b1	36503.1	40	12	52	10.958	3.28739	76.9231	23.0769
	24hpa 2DG0.5mg 40x 0.6 zoom c1	40800.9	36	15	51	8.82334	3.67639	70.5882	29.4118
HC165_20 Experiment #2	24hpa 2DG 0.5mg 40x 0.6 a1	52859.7	21	35	56	3.97278	6.6213	37.5	62.5
	24hpa 2DG 0.5mg 40x 0.6 c1	54600.9	35	53	88	6.41016	9.70681	39.7727	60.2273
	24hpa 2DG 0.5mg 40x 0.6 d1	53178.6	23	27	50	4.32505	5.07723	46	54
	24hpa 2DG 0.5mg 40x 0.6 e1	53000.7	16	19	35	3.01883	3.58486	45.7143	54.2857
	24hpa 2DG 0.5mg 40x 0.6 f1	56798.6	24	21	45	4.22546	3.69727	53.3333	46.6667
	24hpa 2DG 0.5mg 40x 0.6 g1	53602.3	29	36	65	5.41022	6.71613	44.6154	55.3846
HC#166_20 Experiment #1	24hpa 2DG0.5mg 40x 0.6 zoom a1	51490.6	18	9	27	3.49579	1.74789	66.6667	33.3333
	24hpa 2DG0.5mg 40x 0.6 zoom b1	51419.8	41	16	57	7.97358	3.11164	71.9298	28.0702
	24hpa 2DG0.5mg 40x 0.6 zoom c1	50525.6	31	18	49	6.1355	3.56255	63.2653	36.7347
	24hpa 2DG0.5mg 40x 0.6 zoom d1	52317.9	31	18	49	5.92531	3.44051	63.2653	36.7347
	24hpa 2DG0.5mg 40x 0.6 zoom e1	53571	19	12	31	3.54669	2.24002	61.2903	38.7097
	24hpa 2DG0.5mg 40x 0.6 zoom f1	57387.3	29	12	41	5.05338	2.09105	70.7317	29.2683
HC166_20 Experiment #2	24hpa 2DG 0.5mg 40x 0.6 a1	52163.9	15	25	40	2.87555	4.79259	37.5	62.5
	24hpa 2DG 0.5mg 40x 0.6 b1	48393.3	16	21	37	3.30624	4.33944	43.2432	56.7568
	24hpa 2DG 0.5mg 40x 0.6 c1	57339.9	19	35	54	3.31357	6.10395	35.1852	64.8148
	24hpa 2DG 0.5mg 40x 0.6 d1	54755.4	19	29	48	3.46998	5.29628	39.5833	60.4167
	24hpa 2DG 0.5mg 40x 0.6 e1	49263	18	16	34	3.65386	3.24787	52.9412	47.0588
HC#167_20 Experiment #1	24hpa 2DG0.5mg 40x 0.6 zoom a1	47691.4	49	14	63	10.2744	2.93554	77.7778	22.2222
	24hpa 2DG0.5mg 40x 0.6 zoom b1	47555.8	43	23	66	9.04201	4.83642	65.1515	34.8485
	24hpa 2DG0.5mg 40x 0.6 zoom c1	48050.7	35	16	51	7.28398	3.32982	68.6275	31.3725
	24hpa 2DG0.5mg 40x 0.6 zoom d1	45059.7	39	13	52	8.65518	2.88506	75	25
HC167_20 Experiment #2	24hpa 2DG 0.5mg 40x 0.6 a1	43424.2	41	23	64	9.44174	5.29659	64.0625	35.9375
	24hpa 2DG 0.5mg 40x 0.6 b1	41703.6	28	25	53	6.71405	5.99469	52.8302	47.1698
	24hpa 2DG 0.5mg 40x 0.6 c1	42891.2	23	34	57	5.36241	7.92704	40.3509	59.6491
	24hpa 2DG 0.5mg 40x 0.6 f1	42762.3	26	25	51	6.08013	5.84628	50.9804	49.0196
	24hpa 2DG 0.5mg 40x 0.6 g1	43881.1	29	35	64	6.60876	7.97609	45.3125	54.6875
HC#168_20 Experiment #1	24hpa 2DG0.5mg 40x 0.6 zoom a1	42225.9	28	15	43	6.63101	3.55232	65.1163	34.8837
	24hpa 2DG0.5mg 40x 0.6 zoom b1	35111.4	33	5	38	9.39865	1.42404	86.8421	13.1579
	24hpa 2DG0.5mg 40x 0.6 zoom c1	33466.9	37	2	39	11.0557	0.597605	94.8718	5.12821
	24hpa 2DG0.5mg 40x 0.6 zoom d1	30898.5	36	10	46	11.651	3.2364	78.2609	21.7391
HC168_20 Experiment #2	24hpa 2DG 0.5mg 40x 0.6 a1	48727.6	21	15	36	4.30967	3.07834	58.3333	41.6667
	24hpa 2DG 0.5mg 40x 0.6 b1	45750.4	18	26	44	3.93439	5.68301	40.9091	59.0909
	24hpa 2DG 0.5mg 40x 0.6 d1	50130.2	15	27	42	2.99221	5.38598	35.7143	64.2857
	24hpa 2DG 0.5mg 40x 0.6 e1	51411.6	29	30	59	5.64075	5.83526	49.1525	50.8475
	24hpa 2DG 0.5mg 40x 0.6 f1	54489	19	51	70	3.48694	9.35969	27.1429	72.8571
HC212_21 Experiment #3	24hpa OcsGFP488 Runx647 2DG05mg x 40x 0.6 zoom a1	50618	42	41	83	8.29744	8.09988	50.6024	49.3976
	24hpa OcsGFP488 Runx647 2DG05mg x 40x 0.6 zoom b1	48477.4	41	31	72	8.45755	6.39473	56.9444	43.0556
	24hpa OcsGFP488 Runx647 2DG05mg x 40x 0.6 zoom c1	51263.9	39	40	79	7.60769	7.80276	49.3671	50.6329
	24hpa OcsGFP488 Runx647 2DG05mg x 40x 0.6 zoom d1	49551.3	33	45	78	6.65976	9.08149	42.3077	57.6923
	24hpa OcsGFP488 Runx647 2DG05mg x 40x 0.6 zoom e1	44712.4	44	20	64	9.84067	4.47303	68.75	31.25
	24hpa OcsGFP488 Runx647 2DG05mg x 40x 0.6 zoom f1	47511.4	35	51	86	7.36665	10.7343	40.6977	59.3023
	24hpa OcsGFP488 Runx647 2DG05mg x 40x 0.6 zoom g1	41939.2	37	28	65	8.82229	6.67633	56.9231	43.0769
HC213_21 Experiment #3	24hpa OcsGFP488 Runx647 2DG05mg x 40x 0.6 zoom a1	53768.5	32	39	71	5.95144	7.25332	45.0704	54.9296
	24hpa OcsGFP488 Runx647 2DG05mg x 40x 0.6 zoom b1	47229.5	30	26	56	6.35196	5.50503	53.5714	46.4286
	24hpa OcsGFP488 Runx647 2DG05mg x 40x 0.6 zoom c1	53362.5	33	33	66	6.18412	6.18412	50	50
	24hpa OcsGFP488 Runx647 2DG05mg x 40x 0.6 zoom d1	50612.8	28	30	58	5.5322	5.92736	48.2759	51.7241
	24hpa OcsGFP488 Runx647 2DG05mg x 40x 0.6 zoom e1	45532.1	43	28	71	9.44389	6.14951	60.5634	39.4366
	24hpa OcsGFP488 Runx647 2DG05mg x 40x 0.6 zoom f1	47289.9	34	20	54	7.18969	4.22923	62.963	37.037
HC214_21 Experiment #3	24hpa OcsGFP488 Runx647 2DG05mg x 40x 0.6 zoom a1	45549.9	21	38	59	4.61032	8.34249	35.5932	64.4068
	24hpa OcsGFP488 Runx647 2DG05mg x 40x 0.6 zoom b1	48461.2	17	41	58	3.50796	8.46038	29.3103	70.6897
	24hpa OcsGFP488 Runx647 2DG05mg x 40x 0.6 zoom c1	49125.1	26	30	56	5.29262	6.10686	46.4286	53.5714
	24hpa OcsGFP488 Runx647 2DG05mg x 40x 0.6 zoom d1	45242.5	27	10	37	5.96784	2.21031	72.973	27.027
	24hpa OcsGFP488 Runx647 2DG05mg x 40x 0.6 zoom e1	49211.7	33	33	66	6.70572	6.70572	50	50
HC215_21 Experiment #3	24hpa OcsGFP488 Runx647 2DG05mg x 40x 0.6 zoom a1	41322.8	27	51	78	6.53393	12.3419	34.6154	65.3846
	24hpa OcsGFP488 Runx647 2DG05mg x 40x 0.6 zoom b1	44146.7	22	35	57	4.98338	7.92811	38.5965	61.4035
	24hpa OcsGFP488 Runx647 2DG05mg x 40x 0.6 zoom c1	47179.9	41	35	76	8.69014	7.41841	53.9474	46.0526
	24hpa OcsGFP488 Runx647 2DG05mg x 40x 0.6 zoom d1	52704.3	18	22	40	3.41528	4.17423	45	55
	24hpa OcsGFP488 Runx647 2DG05mg x 40x 0.6 zoom e1	57840.5	42	35	77	7.26135	6.05113	54.5455	45.4545
	24hpa OcsGFP488 Runx647 2DG05mg x 40x 0.6 zoom f1	54107.7	36	42	78	6.6534	7.7623	46.1538	53.8462
HC216_21 Experiment #3	24hpa OcsGFP488 Runx647 2DG05mg x 40x 0.6 zoom a1	50821.4	29	20	49	5.70626	3.93535	59.1837	40.8163
	24hpa OcsGFP488 Runx647 2DG05mg x 40x 0.6 zoom b1	52693	25	28	53	4.74446	5.3138	47.1698	52.8302
	24hpa OcsGFP488 Runx647 2DG05mg x 40x 0.6 zoom c1	51223.4	37	21	58	7.22326	4.09969	63.7931	36.2069
	24hpa OcsGFP488 Runx647 2DG05mg x 40x 0.6 zoom d1	41561.5	42	28	70	10.1055	6.737	60	40
	24hpa OcsGFP488 Runx647 2DG05mg x 40x 0.6 zoom f1	48566.2	33	33	66	6.79485	6.79485	50	50
	24hpa OcsGFP488 Runx647 2DG05mg x 40x 0.6 zoom g1	47155.6	37	28	65	7.84637	5.93779	56.9231	43.0769
	24hpa OcsGFP488 Runx647 2DG05mg x 40x 0.6 zoom h1	48185.9	16	47	63	3.32047	9.75389	25.3968	74.6032
HC217_21 Experiment #3	24hpa OcsGFP488 Runx647 2DG05mg x 40x 0.6 zoom a1	53557.4	37	35	72	6.90848	6.53505	51.3889	48.6111
	24hpa OcsGFP488 Runx647 2DG05mg x 40x 0.6 zoom b1	55274.1	39	42	81	7.05574	7.59849	48.1481	51.8519
	24hpa OcsGFP488 Runx647 2DG05mg x 40x 0.6 zoom c1	50946.6	17	46	63	3.33683	9.02907	26.9841	73.0159
	24hpa OcsGFP488 Runx647 2DG05mg x 40x 0.6 zoom d1	56447.6	46	39	85	8.14915	6.90906	54.1176	45.8824
	24hpa OcsGFP488 Runx647 2DG05mg x 40x 0.6 zoom e1	54979	35	54	89	6.36607	9.82194	39.3258	60.6742
