# Supplementary material for: A regeneration-triggered metabolic adaptation is necessary for cell identity transitions and cell cycle re-entry to support blastema formation and bone regeneration
Source: eLife. 2022 Aug 22;11:e76987. doi: 10.7554/eLife.76987 (PMC9395193; doi:10.7554/eLife.76987)
Supplement: Figure 5—figure supplement 1—source data 1. [file elife-76987-fig5-figsupp1-data1.xlsx]

## Sheet: Fig5 – Figure Suppl1 G and H
Control (PBS1x) condition
											Supp Fig 5G PCNA PBS 0-12hpa Column	Supp Fig 5H PCNA PBS 0-12hpa Column	Supp Fig 5G EdU PBS 0-12hpa Column	Supp Fig 5H EdU PBS 0-12hpa Column
Number of fish	Fin Cryosection Internal reference (File name)	area epidermis	area mesenchyme	total area	number of PCNA+ cells in epidermis	number of PCNA+ cells in mesenchyme	Total number of PCNA+ cells	number of EdU+ in epidermis	number of EdU+ in mesenchyme	Total number of EdU+ cells	nº of PCNA + cells in epidermis per 100um2	nº of PCNA+ cells in mesenchyme per 100um2	nº of EdU + cells in epidermis per 100um2	nº of EdU+ cells in mesenchyme 100um2
HC158_20	24hpa Control PBS OsxmCherry568 EdU488 PCNA647 40x 0,6 a1	11434.6	18944.9	30379.5	15	94	109	13	60	73	13.1181	49.6175	11.369	31.6708
	24hpa Control PBS OsxmCherry568 EdU488 PCNA647 40x 0,6 b1	11676.1	23225.7	34901.7	11	95	106	13	77	90	9.42097	40.903	11.1339	33.153
	24hpa Control PBS OsxmCherry568 EdU488 PCNA647 40x 0,6 c1	11581.8	16845.7	28427.4	19	103	122	17	59	76	16.4051	61.1433	14.6782	35.0239
	24hpa Control PBS OsxmCherry568 EdU488 PCNA647 40x 0,6 d1	11339.7	18558.1	29897.8	21	108	129	21	57	78	18.5191	58.1955	18.5191	30.7143
	24hpa Control PBS OsxmCherry568 EdU488 PCNA647 40x 0,6 e1	16115	15411.9	31527	35	100	135	21	62	83	21.7189	64.8848	13.0313	40.2286
HC159_20	24hpa Control PBS OsxmCherry568 EdU488 PCNA647 40x 0,6 a1	13389.6	15951.7	29341.3	25	113	138	29	60	89	18.6712	70.839	21.6586	37.6136
	24hpa Control PBS OsxmCherry568 EdU488 PCNA647 40x 0,6 b1	16658.4	20778.7	37437.1	59	155	214	42	62	104	35.4176	74.5955	25.2126	29.8382
	24hpa Control PBS OsxmCherry568 EdU488 PCNA647 40x 0,6 c1	16662.4	17836.9	34499.4	37	131	168	16	61	77	22.2056	73.4431	9.60244	34.1987
	24hpa Control PBS OsxmCherry568 EdU488 PCNA647 40x 0,6 d1	19348.1	15165	34513.1	41	97	138	38	40	78	21.1907	63.9629	19.6402	26.3765
	24hpa Control PBS OsxmCherry568 EdU488 PCNA647 40x 0,6 e1	18071	10326.5	28397.5	32	47	79	48	41	89	17.7079	45.5141	26.5618	39.7038
HC160_20	24hpa Control PBS OsxmCherry568 EdU488 PCNA647 40x 0,6 a1	23875.7	15016.4	38892.1	74	97	171	34	40	74	30.9938	64.5961	14.2404	26.6376
	24hpa Control PBS OsxmCherry568 EdU488 PCNA647 40x 0,6 b1	19160.1	25534.8	44694.9	66	137	203	32	55	87	34.4466	53.6522	16.7014	21.5392
	24hpa Control PBS OsxmCherry568 EdU488 PCNA647 40x 0,6 c1	18115.6	22280.4	40396	44	106	150	24	77	101	24.2885	47.5754	13.2483	34.5595
	24hpa Control PBS OsxmCherry568 EdU488 PCNA647 40x 0,6 d1	17625.1	18014.2	35639.3	59	120	179	29	75	104	33.475	66.6142	16.4538	41.6338
	24hpa Control PBS OsxmCherry568 EdU488 PCNA647 40x 0,6 e1	14193.8	19097.7	33291.6	62	111	173	41	48	89	43.6809	58.122	28.8858	25.1339
HC161_20	24hpa Control PBS OsxmCherry568 EdU488 PCNA647 40x 0,6 a1	19476.4	12505.2	31981.6	47	105	152	47	38	85	24.1318	83.9651	24.1318	30.3874
	24hpa Control PBS OsxmCherry568 EdU488 PCNA647 40x 0,6 c1	22436.7	20970.6	43407.3	41	138	179	25	79	104	18.2736	65.8065	11.1424	37.6718
	24hpa Control PBS OsxmCherry568 EdU488 PCNA647 40x 0,6 d1	21521.9	21853.7	43375.6	26	132	158	11	72	83	12.0807	60.4017	5.11107	32.9464
	24hpa Control PBS OsxmCherry568 EdU488 PCNA647 40x 0,6 e1	19594	19171.9	38766	43	122	165	32	57	89	21.9454	63.6346	16.3315	29.7309
	24hpa Control PBS OsxmCherry568 EdU488 PCNA647 40x 0,6 f1	21281.6	17454.8	38736.4	58	114	172	24	49	73	27.2536	65.3115	11.2773	28.0725
HC162_20	24hpa Control PBS OsxmCherry568 EdU488 PCNA647 40x 0,6 a1	14373.2	11220	25593.2	35	72	107	40	52	92	24.3508	64.1712	27.8295	46.3459
	24hpa Control PBS OsxmCherry568 EdU488 PCNA647 40x 0,6 b1	12837.1	11291.8	24128.9	34	75	109	34	54	88	26.4858	66.4199	26.4858	47.8223
	24hpa Control PBS OsxmCherry568 EdU488 PCNA647 40x 0,6 c1	14193.7	15209	29402.7	41	131	172	40	89	129	28.886	86.1335	28.1815	58.5182
	24hpa Control PBS OsxmCherry568 EdU488 PCNA647 40x 0,6 d1	18323	17804.4	36127.3	53	171	224	42	87	129	28.9255	96.0437	22.9221	48.8643
	24hpa Control PBS OsxmCherry568 EdU488 PCNA647 40x 0,6 e1	14377.6	18770.8	33148.3	22	175	197	17	96	113	15.3016	93.23	11.824	51.1433
	24hpa Control PBS OsxmCherry568 EdU488 PCNA647 40x 0,6 g1	15065.2	19064.4	34129.6	36	125	161	36	88	124	23.8961	65.5674	23.8961	46.1594
2DG condition
											Supp Fig 5G PCNA 2DG 0-12hpa Column	Supp Fig 5H PCNA 2DG 0-12hpa Column	Supp Fig 5G EdU 2DG 0-12hpa Column	Supp Fig 5H EdU2DG 0-12hpa Column
Number of fish	Fin Cryosection Internal reference (File name)	area epidermis	area mesenchyme	total area	number of PCNA+ cells in epidermis	number of PCNA+ cells in mesenchyme	Total number of PCNA+ cells	number of EdU+ in epidermis	number of EdU+ in mesenchyme	Total number of EdU+ cells	nº of PCNA + cells in epidermis per 100um2	nº of PCNA+ cells in mesenchyme per 100um2	nº of EdU + cells in epidermis per 100um2	nº of EdU+ cells in mesenchyme 100um2
HC163_20	24hpa 2DG 0.5mg OsxmCherry568 EdU488 PCNA647 40x 0.6 a1	9199.83	20943.7	30143.5	28	74	102	27	31	58	30.4353	35.3329	29.3484	14.8016
	24hpa 2DG 0.5mg OsxmCherry568 EdU488 PCNA647 40x 0.6 b1	12674.4	19548.3	32222.8	21	63	84	21	31	52	16.5688	32.2278	16.5688	15.8581
	24hpa 2DG 0.5mg OsxmCherry568 EdU488 PCNA647 40x 0.6 c1	11410.2	21512.5	32922.6	32	110	142	27	48	75	28.0452	51.1331	23.6631	22.3126
	24hpa 2DG 0.5mg OsxmCherry568 EdU488 PCNA647 40x 0.6 d1	14998.8	18717.4	33716.2	35	74	109	24	47	71	23.3352	39.5354	16.0013	25.1103
	24hpa 2DG 0.5mg OsxmCherry568 EdU488 PCNA647 40x 0.6 e1	11250.5	14362.4	25612.9	58	50	108	43	17	60	51.5532	34.8132	38.2205	11.8365
	24hpa 2DG 0.5mg OsxmCherry568 EdU488 PCNA647 40x 0.6 f1	11962.3	20468.1	32430.4	66	81	147	40	32	72	55.1731	39.5739	33.4383	15.6341
HC164_20	24hpa 2DG 0.5mg OsxmCherry568 EdU488 PCNA647 40x 0.6 a1	27621.6	11906	39527.6	20	34	54	6	25	31	7.2407	28.5571	2.17221	20.9979
	24hpa 2DG 0.5mg OsxmCherry568 EdU488 PCNA647 40x 0.6 b1	25092.3	17864.7	42957	7	79	86	3	38	41	2.7897	44.2213	1.19559	21.271
	24hpa 2DG 0.5mg OsxmCherry568 EdU488 PCNA647 40x 0.6 c1	24654.6	19860.9	44515.5	34	73	107	16	41	57	13.7905	36.7556	6.48966	20.6435
	24hpa 2DG 0.5mg OsxmCherry568 EdU488 PCNA647 40x 0.6 d1	22292.7	23329.3	45621.9	32	113	145	21	70	91	14.3545	48.437	9.42014	30.0052
	24hpa 2DG 0.5mg OsxmCherry568 EdU488 PCNA647 40x 0.6 e1	17972.2	21859.4	39831.6	56	109	165	34	82	116	31.1593	49.8641	18.9181	37.5124
	24hpa 2DG 0.5mg OsxmCherry568 EdU488 PCNA647 40x 0.6 f1	20920.9	21064.9	41985.8	71	107	178	57	42	99	33.9373	50.7954	27.2455	19.9384
HC165_20	24hpa 2DG 0.5mg OsxmCherry568 EdU488 PCNA647 40x 0.6 a1	21424.9	18285.1	39710	59	83	142	30	45	75	27.5381	45.3921	14.0024	24.6102
	24hpa 2DG 0.5mg OsxmCherry568 EdU488 PCNA647 40x 0.6 b1	21720	18226	39946	30	77	107	29	54	83	13.8122	42.2473	13.3518	29.628
	24hpa 2DG 0.5mg OsxmCherry568 EdU488 PCNA647 40x 0.6 c1	19296.7	16262.7	35559.4	35	81	116	18	49	67	18.1379	49.8072	9.32804	30.1303
	24hpa 2DG 0.5mg OsxmCherry568 EdU488 PCNA647 40x 0.6 d1	24432.8	18443.4	42876.2	46	99	145	23	37	60	18.8271	53.6779	9.41356	20.0614
	24hpa 2DG 0.5mg OsxmCherry568 EdU488 PCNA647 40x 0.6 e1	23155.5	18658.1	41813.6	33	91	124	14	49	63	14.2515	48.7725	6.04607	26.2621
	24hpa 2DG 0.5mg OsxmCherry568 EdU488 PCNA647 40x 0.6 g1	26742.6	11610.7	38353.3	18	24	42	28	28	56	6.73083	20.6705	10.4702	24.1156
HC166_20	24hpa 2DG 0.5mg OsxmCherry568 EdU488 PCNA647 40x 0.6 a1	25178.1	8602.05	33780.1	74	20	94	29	9	38	29.3907	23.2503	11.518	10.4626
	24hpa 2DG 0.5mg OsxmCherry568 EdU488 PCNA647 40x 0.6 b1	19701.9	10215.5	29917.4	38	57	95	19	21	40	19.2875	55.7974	9.64375	20.5569
	24hpa 2DG 0.5mg OsxmCherry568 EdU488 PCNA647 40x 0.6 c1	21838.1	15913.5	37751.6	41	54	95	21	28	49	18.7745	33.9335	9.61621	17.5951
	24hpa 2DG 0.5mg OsxmCherry568 EdU488 PCNA647 40x 0.6 d1	21230	13869.8	35099.8	44	63	107	22	19	41	20.7254	45.4225	10.3627	13.6989
	24hpa 2DG 0.5mg OsxmCherry568 EdU488 PCNA647 40x 0.6 e1	17243.8	19198.8	36442.6	20	71	91	27	31	58	11.5984	36.9816	15.6578	16.1469
	24hpa 2DG 0.5mg OsxmCherry568 EdU488 PCNA647 40x 0.6 g1	12880.8	22415.3	35296.1	12	68	80	23	21	44	9.31623	30.3364	17.8561	9.36859
HC167_20	24hpa 2DG 0.5mg OsxmCherry568 EdU488 PCNA647 40x 0.6 a1	17129.9	11863.5	28993.4	8	51	59	10	44	54	4.6702	42.989	5.83775	37.0886
	24hpa 2DG 0.5mg OsxmCherry568 EdU488 PCNA647 40x 0.6 b1	15126	14392.4	29518.4	16	74	90	10	34	44	10.5778	51.416	6.61113	23.6236
	24hpa 2DG 0.5mg OsxmCherry568 EdU488 PCNA647 40x 0.6 c1	12719.4	15101.8	27821.3	15	71	86	12	38	50	11.793	47.0141	9.43439	25.1625
	24hpa 2DG 0.5mg OsxmCherry568 EdU488 PCNA647 40x 0.6 e1	16342.3	7661.62	24003.9	14	57	71	7	34	41	8.56673	74.3968	4.28336	44.377
	24hpa 2DG 0.5mg OsxmCherry568 EdU488 PCNA647 40x 0.6 f1	13263.8	16415.4	29679.3	13	75	88	13	51	64	9.80109	45.6888	9.80109	31.0684
HC168_20	24hpa 2DG 0.5mg OsxmCherry568 EdU488 PCNA647 40x 0.6 a1	24778.6	12078.1	36856.7	34	46	80	19	17	36	13.7215	38.0855	7.66791	14.0751
	24hpa 2DG 0.5mg OsxmCherry568 EdU488 PCNA647 40x 0.6 b1	21229.1	17198.5	38427.5	39	55	94	13	16	29	18.371	31.9796	6.12368	9.30315
	24hpa 2DG 0.5mg OsxmCherry568 EdU488 PCNA647 40x 0.6 c1	19675.5	20212.2	39887.7	50	58	108	12	25	37	25.4123	28.6956	6.09894	12.3688
	24hpa 2DG 0.5mg OsxmCherry568 EdU488 PCNA647 40x 0.6 d1	18182.9	19574.1	37757	41	77	118	16	22	38	22.5486	39.3378	8.79946	11.2394
	24hpa 2DG 0.5mg OsxmCherry568 EdU488 PCNA647 40x 0.6 e1	15171	25599.8	40770.8	28	76	104	13	22	35	18.4562	29.6877	8.56897	8.59381
	24hpa 2DG 0.5mg OsxmCherry568 EdU488 PCNA647 40x 0.6 f1	13499.4	21717.2	35216.6	47	74	121	19	29	48	34.8165	34.0743	14.0747	13.3534

## Sheet: Fig5 – Figure Suppl1 O
Control (DMSO) Condition
						Supp Fig5O Epidermis DMSO Column	Supp Fig5O Mesenchyme DMSO Column	Supp Fig5O Bglap+ (OB) DMSO Column
Number of fish	Fin Cryosection Internal reference (File name)	Fin Area	number of PCNA + cells in epidermis	number of PCNA + cells in mesenchyme	number of PCNA + bglap+ cells (OBs)	nº of PCNA + epidermal cells per 100um	nº of mesenchymal cells per 100um	nº of bglap+ cells (OBs) per 100um
#1	24hpa Oc2GFP488 PCNA568 DMSO 40x 0.6 zoom a1	40655.1	29	115	24	7.13318	28.2867	5.90332
	24hpa Oc2GFP488 PCNA568 DMSO 40x 0.6 zoom b1	37202.5	49	70	12	13.1711	18.8159	3.22559
#2	24hpa Oc2GFP488 PCNA568 DMSO 40x 0.6 zoom a1	34273.1	29	48	19	8.46145	14.0052	5.54371
	4hpa Oc2GFP488 PCNA568 DMSO 40x 0.6 zoom b1	35382.1	37	49	17	10.4573	13.8488	4.80469
#3	24hpa Oc2GFP488 PCNA568 DMSO 40x 0.6 zoom a1	55174	30	71	19	5.43734	12.8684	3.44365
	24hpa Oc2GFP488 PCNA568 DMSO 40x 0.6 zoom b1	54558.1	21	125	18	3.84911	22.9113	3.29923
	24hpa Oc2GFP488 PCNA568 DMSO 40x 0.6 zoom c1	54379.7	22	100	19	4.04563	18.3892	3.49395
	24hpa Oc2GFP488 PCNA568 DMSO 40x 0.6 zoom d1	49405.3	20	78	24	4.04815	15.7878	4.85778
#4	24hpa Oc2GFP488 PCNA568 DMSO 40x 0.6 zoom a1	48657.1	52	44	8	10.687	9.04288	1.64416
	24hpa Oc2GFP488 PCNA568 DMSO 40x 0.6 zoom b1	47565.4	65	64	10	13.6654	13.4552	2.10237
3PO Condition
						Supp Fig5O Epidermis 3PO Column	Supp Fig5O Mesenchyme 3PO Column	Supp Fig5O Bglap+ (OB) 3PO Column
Number of fish	Fin Cryosection Internal reference (File name)	Fin Area	number of PCNA + cells in epidermis	number of PCNA + cells in mesenchyme	number of PCNA + bglap+ cells (OBs)	nº of PCNA + epidermal cells per 100um	nº of mesenchymal cells per 100um	nº of bglap+ cells (OBs) per 100um
#1	24hpa Oc2GFP488 PCNA568 3PO 40x 0.6 zoom a1	28256.1	14	31	8	4.95469	10.9711	2.83125
	24hpa Oc2GFP488 PCNA568 3PO 40x 0.6 zoom b1	26824.5	9	22	6	3.35515	8.20147	2.23676
#2	24hpa Oc2GFP488 PCNA568 3PO 40x 0.6 zoom a1	23565.2	9	33	4	3.81919	14.0037	1.69742
	24hpa Oc2GFP488 PCNA568 3PO 40x 0.6 zoom b1	24565	4	4	0	1.62834	1.62834	0
	24hpa Oc2GFP488 PCNA568 3PO 40x 0.6 zoom c1	24748.4	14	15	10	5.65692	6.06099	4.04066
#3	24hpa Oc2GFP488 PCNA568 3PO 40x 0.6 zoom a1	58607.4	36	54	7	6.14257	9.21385	1.19439
	24hpa Oc2GFP488 PCNA568 3PO 40x 0.6 zoom b1	57735	32	65	17	5.54257	11.2583	2.94449
	24hpa Oc2GFP488 PCNA568 3PO 40x 0.6 zoom c1	56785.1	72	27	6	12.6794	4.75477	1.05662
	24hpa Oc2GFP488 PCNA568 3PO 40x 0.6 zoom d1	54320.7	43	23	9	7.91595	4.23411	1.65683
#4	24hpa Oc2GFP488 PCNA568 3PO 40x 0.6 zoom a1	44383.1	35	52	6	7.88589	11.7162	1.35187
	24hpa Oc2GFP488 PCNA568 3PO 40x 0.6 zoom b1	42242.9	22	46	8	5.20798	10.8894	1.89381
	24hpa Oc2GFP488 PCNA568 3PO 40x 0.6 zoom c1	47580.1	23	46	17	4.83395	9.66791	3.57292
#5	24hpa Oc2GFP488 PCNA568 3PO 40x 0.6 zoom a1	45588.8	16	19	8	3.50963	4.16769	1.75482
	24hpa Oc2GFP488 PCNA568 3PO 40x 0.6 zoom b1	52874.3	13	42	11	2.45866	7.94337	2.08041
	24hpa Oc2GFP488 PCNA568 3PO 40x 0.6 zoom c1	51008.1	4	64	7	0.784188	12.547	1.37233
