# Supplementary material for: A regeneration-triggered metabolic adaptation is necessary for cell identity transitions and cell cycle re-entry to support blastema formation and bone regeneration
Source: eLife. 2022 Aug 22;11:e76987. doi: 10.7554/eLife.76987 (PMC9395193; doi:10.7554/eLife.76987)
Supplement: Figure 5—figure supplement 2—source data 1. [file elife-76987-fig5-figsupp2-data1.xlsx]

## Sheet: Fig5 Fig Sup2 I-L
Control (PBS1x)
Number of fish	Fin Cryosection Internal reference (File name)										Supp Fig4I PBS1x 0-12hpa	Supp Fig4J PBS1x 0-12hpa		Supp Fig4K PBS1x 0-12hpa	Supp Fig4K PBS1x 0-12hpa
		Fin area	Area epidermis	Area mesenchyme	total runx2+ preOBs	number of TUNEL+ cells epidermis	number of TUNEL+ cells mesenchyme	TUNEL epidermal cell + mesenchymal cells	number of TUNEL+ preOBs	total number of TUNEL+ cells	Nº of TUNEL+ epidermal cell per 100um2	Nº of TUNEL+ mesenchymal cell per 100um2	Nº of TUNEL+ epidermal cells + mesenchymal cell per 100um2	Nº of prePBs TUNEL+ cell per 100um2	% of preOBS TUNEL+
HC483_20	24hpa Osxmcherry568 Runx2Cy5 TUNEL488 40x 0.6zoom a1	50986.5	29510.2	21476.4	47	44	8	52	1	53	14.9101	3.72503	10.1988	0.465628	2.12766
	24hpa Osxmcherry568 Runx2Cy5 TUNEL488 40x 0.6zoom b1	51375.9	26547	24828.9	55	47	0	47	0	47	17.7045	0	9.14827	0	0
	24hpa Osxmcherry568 Runx2Cy5 TUNEL488 40x 0.6zoom c1	46521.3	27954.6	18566.7	66	59	5	64	3	67	21.1057	2.69299	13.7571	1.6158	4.54545
	24hpa Osxmcherry568 Runx2Cy5 TUNEL488 40x 0.6zoom d1	43161.1	24727.1	18434	45	78	5	83	6	89	31.5443	2.71238	19.2303	3.25485	13.3333
HC484_20	24hpa Osxmcherry568 Runx2Cy5 TUNEL488 PBS1x control 40x 0.6zoom f1	47755.5	34912.9	12842.6	37	22	3	25	0	25	6.3014	2.33598	5.235	0	0
	24hpa Osxmcherry568 Runx2Cy5 TUNEL488 PBS1x control 40x 0.6zoom e1	46715.8	29911.2	16804.7	53	17	4	21	3	24	5.68349	2.38029	4.49526	1.78522	5.66038
	24hpa Osxmcherry568 Runx2Cy5 TUNEL488 PBS1x control 40x 0.6zoom c1	50051.3	25087.8	24963.5	57	53	4	57	0	57	21.1258	1.60234	11.3883	0	0
	24hpa Osxmcherry568 Runx2Cy5 TUNEL488 PBS1x control 40x 0.6zoom a1	51812.4	28886.8	22925.6	50	20	9	29	0	29	6.92358	3.92574	5.59712	0	0
HC485_20	24hpa Osxmcherry568 Runx2Cy5 TUNEL488 PBS1x control 40x 0.6zoom b1	48214.1	22267.4	25946.6	50	71	4	75	1	76	31.8851	1.54163	15.5556	0.385407	2
	24hpa Osxmcherry568 Runx2Cy5 TUNEL488 PBS1x control 40x 0.6zoom d1	43608.9	17343.1	26265.7	30	72	3	75	4	79	41.515	1.14217	17.1983	1.5229	13.3333
	24hpa Osxmcherry568 Runx2Cy5 TUNEL488 PBS1x control 40x 0.6zoom e1	43892.3	19948.3	23944	50	52	5	57	2	59	26.0673	2.08821	12.9863	0.835282	4
	24hpa Osxmcherry568 Runx2Cy5 TUNEL488 PBS1x control 40x 0.6zoom a1	47201.8	22549.7	24652.1	47	45	4	49	3	52	19.9559	1.62258	10.381	1.21693	6.38298
	24hpa Osxmcherry568 Runx2Cy5 TUNEL488 PBS1x control 40x 0.6zoom f1	41428.2	23055.8	18372.4	33	89	12	101	4	105	38.602	6.53154	24.3796	2.17718	12.1212
HC486_20	24hpa Osxmcherry568 Runx2Cy5 TUNEL488 PBS1x control 40x 0.6zoom a1	37600.8	16000.3	21600.5	55	34	4	38	0	38	21.2495	1.85181	10.1062	0	0
	24hpa Osxmcherry568 Runx2Cy5 TUNEL488 PBS1x control 40x 0.6zoom b1	33634.9	16430	17205	54	30	1	31	0	31	18.2593	0.581228	9.21661	0	0
	24hpa Osxmcherry568 Runx2Cy5 TUNEL488 PBS1x control 40x 0.6zoom c1	46581.7	23656.5	22925.2	83	41	5	46	1	47	17.3314	2.181	9.87512	0.4362	1.20482
	24hpa Osxmcherry568 Runx2Cy5 TUNEL488 PBS1x control 40x 0.6zoom d1	46567.4	18587.7	27979.7	77	43	2	45	0	45	23.1336	0.714803	9.66341	0	0
2DG
Number of fish	Fin Cryosection Internal reference (File name)										Supp Fig4I PBS1x 0-12hpa	Supp Fig4J PBS1x 0-12hpa		Supp Fig4K PBS1x 0-12hpa	Supp Fig4K PBS1x 0-12hpa
		Fin area	Area epidermis	Area mesenchyme	total runx2+ preOBs	number of TUNEL+ cells epidermis	number of TUNEL+ cells mesenchyme	TUNEL epidermal cell + mesenchymal cells	number of TUNEL+ preOBs	total number of TUNEL+ cells	Nº of TUNEL+ epidermal cell per 100um2	Nº of TUNEL+ mesenchymal cell per 100um2	Nº of TUNEL+ epidermal cells + mesenchymal cell per 100um2	Nº of prePBs TUNEL+ cell per 100um2	% of preOBS TUNEL+
HC487_20	24hpa Osxmcherry568 Runx2Cy5 TUNEL488 2DG 0.5mg 40x 0.6zoom a1	38685.7	17518.4	21167.4	36	14	4	18	3	21	7.99162	1.8897	4.65288	1.41728	8.33333
	24hpa Osxmcherry568 Runx2Cy5 TUNEL488 2DG 0.5mg 40x 0.6zoom b1	29547.8	11702.9	17844.9	35	39	12	51	1	52	33.3249	6.72462	17.2602	0.560385	2.85714
	24hpa Osxmcherry568 Runx2Cy5 TUNEL488 2DG 0.5mg 40x 0.6zoom c1	26513.3	11144.9	15368.4	37	33	5	38	2	40	29.6099	3.25343	14.3324	1.30137	5.40541
	24hpa Osxmcherry568 Runx2Cy5 TUNEL488 2DG 0.5mg 40x 0.6zoom d1	29082.4	12205.9	16876.5	39	37	9	46	2	48	30.3132	5.33285	15.8171	1.18508	5.12821
HC488_20	24hpa Osxmcherry568 Runx2Cy5 TUNEL488 2DG 0.5mg 40x 0.6zoom a1	41638.6	21679.5	19959.1	44	30	11	41	2	43	13.838	5.51128	9.84664		4.54545
	24hpa Osxmcherry568 Runx2Cy5 TUNEL488 2DG 0.5mg 40x 0.6zoom b1	45617.9	20351.3	25266.6	54	59	17	76	4	80	28.9908	6.72824	16.6601	1.58312	7.40741
	24hpa Osxmcherry568 Runx2Cy5 TUNEL488 2DG 0.5mg 40x 0.6zoom c1	43638.2	30674.6	12963.6	53	50	7	57	2	59	16.3001	5.39974	13.062	1.54278	3.77358
	24hpa Osxmcherry568 Runx2Cy5 TUNEL488 2DG 0.5mg 40x 0.6zoom d1	40899.6	28373	12526.6	52	47	12	59	0	59	16.565	9.57964	14.4256	0	0
	24hpa Osxmcherry568 Runx2Cy5 TUNEL488 2DG 0.5mg 40x 0.6zoom e1	31920.9	17729	14191.9	45	24	7	31	3	34	13.5371	4.93238	9.7115	2.11388	6.66667
	24hpa Osxmcherry568 Runx2Cy5 TUNEL488 2DG 0.5mg 40x 0.6zoom f1	31227.6	18501.8	12725.8	42	14	5	19	1	20	7.56681	3.92904	6.08436	0.785807	2.38095
	24hpa Osxmcherry568 Runx2Cy5 TUNEL488 2DG 0.5mg 40x 0.6zoom g1	28115.3	15600.5	12514.8	57	23	8	31	0	31	14.7431	6.39245	11.026	0	0
HC489_20	24hpa Osxmcherry568 Runx2Cy5 TUNEL488 2DG 0.5mg 40x 0.6zoom a1	35817.7	13161.2	22656.4	43	14	5	19	0	19	10.6373	2.20688	5.30465	0	0
	24hpa Osxmcherry568 Runx2Cy5 TUNEL488 2DG 0.5mg 40x 0.6zoom b1	39742.3	11923.2	27819	37	20	8	28	0	28	16.774	2.87573	7.04539	0	0
	24hpa Osxmcherry568 Runx2Cy5 TUNEL488 2DG 0.5mg 40x 0.6zoom c1	36779.6	12730.1	24049.5	33	21	10	31	1	32	16.4964	4.15809	8.42859	0.415809	3.0303
	24hpa Osxmcherry568 Runx2Cy5 TUNEL488 2DG 0.5mg 40x 0.6zoom d1	34695.4	13302	21393.4	30	23	8	31	2	33	17.2906	3.73947	8.9349	0.934868	6.66667
	24hpa Osxmcherry568 Runx2Cy5 TUNEL488 2DG 0.5mg 40x 0.6zoom e1	41122	13355.2	27766.8	38	22	4	26	0	26	16.473	1.44057	6.32265	0	0
	24hpa Osxmcherry568 Runx2Cy5 TUNEL488 2DG 0.5mg 40x 0.6zoom f1	36910.9	12112.3	24798.6	27	33	9	42	0	42	27.245	3.62923	11.3787	0	0
	24hpa Osxmcherry568 Runx2Cy5 TUNEL488 2DG 0.5mg 40x 0.6zoom g1	40073	16181.2	23891.8	39	28	0	28	0	28	17.3041	0	6.98725	0	0
