# Supplementary material for: A regeneration-triggered metabolic adaptation is necessary for cell identity transitions and cell cycle re-entry to support blastema formation and bone regeneration
Source: eLife. 2022 Aug 22;11:e76987. doi: 10.7554/eLife.76987 (PMC9395193; doi:10.7554/eLife.76987)
Supplement: Figure 5—source data 1. [file elife-76987-fig5-data1.xlsx]

## Sheet: Fig5H and I
Control (PBS1x) Condition for 2DG
								Fig5H PBS 0-12hpa Runx2+Bglap+ Column	Fig5H PBS 0-12hpa Runx2+Bglap- Column		Fig5I PBS 0-12hpa Runx2+Bglap+ Column		Fig5I PBS 0-12hpa Runx2+Bglap- Column
Number of fish	Fin Cryosection Internal reference (File name)	Fin area	total OB (runx2+ and bglap+) number	number of runx2+bglap+	number of runx2+bglap-	number of runx2+bglap+ EdU+	number of runx2+bglap- EdU +	runx2+bglap+EDU+ per 100um2	runx2+bglap- EDU+ 100um2		% of runx2+bglap+ EDU+	% of runx2+bglap+ EDU- %	% of runx2+bglap- EDU+	% of runx2+bglap- EDU- %
HC#158_20	24hpa PBS1x 40x 0.6 zoom a1	45850.8	82	51	31	14	16	3.05338	3.48958		27.451	72.549	51.6129	48.3871
	24hpa PBS1x 40x 0.6 zoom b1	43886.6	61	40	21	14	8	3.19004	1.82288		35	65	38.0952	61.9048
	24hpa PBS1x 40x 0.6 zoom c1	44042.6	70	33	37	19	17	4.31401	3.8599		57.5758	42.4242	45.9459	54.0541
	24hpa PBS1x 40x 0.6 zoom d1	36839.9	64	28	36	8	12	2.17156	3.25734		28.5714	71.4286	33.3333	66.6667
	24hpa PBS1x 40x 0.6 zoom e1	47716.9	65	43	22	17	7	3.56268	1.46699		39.5349	60.4651	31.8182	68.1818
HC#159_20	24hpa PBS1x 40x 0.6 zoom a1	33826.1	47	34	13	7	5	2.06941	1.47815		20.5882	79.4118	38.4615	61.5385
	24hpa PBS1x 40x 0.6 zoom b1	34629	66	45	21	6	8	1.73265	2.3102		13.3333	86.6667	38.0952	61.9048
	24hpa PBS1x 40x 0.6 zoom c1	40459.3	55	36	19	7	3	1.73013	0.741486		19.4444	80.5556	15.7895	84.2105
HC#160_20	24hpa PBS1x 40x 0.6 zoom a1	49348.6	51	35	16	14	8	2.83696	1.62112		40	60	50	50
	24hpa PBS1x 40x 0.6 zoom b1	48349	49	27	22	8	9	1.65463	1.86146		29.6296	70.3704	40.9091	59.0909
	24hpa PBS1x 40x 0.6 zoom c1	50177.8	80	45	35	12	14	2.39149	2.79008		26.6667	73.3333	40	60
	24hpa PBS1x 40x 0.6 zoom d1	48673.6	59	41	18	11	3	2.25995	0.616351		26.8293	73.1707	16.6667	83.3333
	24hpa PBS1x 40x 0.6 zoom e1	53746.8	62	40	22	15	9	2.79086	1.67452		37.5	62.5	40.9091	59.0909
	24hpa PBS1x 40x 0.6 zoom f1	52853.6	77	45	32	7	12	1.32441	2.27042		15.5556	84.4444	37.5	62.5
	24hpa PBS1x 40x 0.6 zoom g1	48898.4	73	52	21	14	9	2.86308	1.84055		26.9231	73.0769	42.8571	57.1429
HC#161_20	24hpa PBS1x 40x 0.6 zoom a1	47409.1	74	31	43	7	17	1.47651	3.58581		22.5806	77.4194	39.5349	60.4651
	24hpa PBS1x 40x 0.6 zoom b1	45641.1	85	50	35	14	12	3.06741	2.62921		28	72	34.2857	65.7143
	24hpa PBS1x 40x 0.6 zoom c1	42455.2	67	40	27	11	13	2.59097	3.06205		27.5	72.5	48.1481	51.8519
	24hpa PBS1x 40x 0.6 zoom d1	50556.6	80	37	43	9	15	1.78018	2.96697		24.3243	75.6757	34.8837	65.1163
	24hpa PBS1x 40x 0.6 zoom e1	51688.9	70	37	33	14	14	2.70851	2.70851		37.8378	62.1622	42.4242	57.5758
	24hpa PBS1x 40x 0.6 zoom f1	50495.8	78	47	31	8	10	1.58429	1.98036		17.0213	82.9787	32.2581	67.7419
	24hpa PBS1x 40x 0.6 zoom g1	49520.7	71	43	28	12	7	2.42323	1.41355		27.907	72.093	25	75
HC#162_20	24hpa PBS1x 40x 0.6 zoom a1	31965.6	63	36	27	9	10	2.81553	3.12837		25	75	37.037	62.963
2DG condition
								Fig5H PBS 0-12hpa Runx2+Bglap+ Column	Fig5H PBS 0-12hpa Runx2+Bglap+ Column		Fig5I PBS 0-12hpa Runx2+Bglap+ Column		Fig5I PBS 0-12hpa Runx2+Bglap- Column
Number of fish	Fin Cryosection Internal reference (File name)	Fin area	total OB (runx2+ and bglap+) number	number of runx2+bglap+	number of runx2+bglap-	number of runx2+bglap+ EdU+	number of runx2+bglap- EdU +	runx2+bglap+EDU+ per 100um2	runx2+bglap- EDU+ 100um2		% of runx2+bglap+ EDU+	% of runx2+bglap+ EDU- %	% of runx2+bglap- EDU+	% of runx2+bglap- EDU- %
HC#163_20	24hpa 2DG0.5mg 40x 0.6 zoom a1	48323.2	63	44	19	4	2	0.82776	0.41388		9.09091	90.9091	10.5263	89.4737
	24hpa 2DG0.5mg 40x 0.6 zoom b1	51177.1	60	36	24	3	5	0.586199	0.976999		8.33333	91.6667	20.8333	79.1667
	24hpa 2DG0.5mg 40x 0.6 zoom c1	52103.6	58	37	21	2	4	0.383851	0.767702		5.40541	94.5946	19.0476	80.9524
	24hpa 2DG0.5mg 40x 0.6 zoom d1	52109.5	39	33	6	0	1	0	0.191903		0	100	16.6667	83.3333
	24hpa 2DG0.5mg 40x 0.6 zoom e1	48516.7	48	33	15	4	1	0.824458	0.206115		12.1212	87.8788	6.66667	93.3333
	24hpa 2DG0.5mg 40x 0.6 zoom f1	51148.6	67	45	22	2	3	0.391017	0.586526		4.44444	95.5556	13.6364	86.3636
	24hpa 2DG0.5mg 40x 0.6 zoom g1	46640.3	39	25	14	2	1	0.428814	0.214407		8	92	7.14286	92.8571
HC#164_20	24hpa 2DG0.5mg 40x 0.6 zoom a1	47621.6	66	46	20	13	9	2.72985	1.8899		28.2609	71.7391	45	55
	24hpa 2DG0.5mg 40x 0.6 zoom b1	51338.8	63	44	19	11	7	2.14263	1.36349		25	75	36.8421	63.1579
	24hpa 2DG0.5mg 40x 0.6 zoom c1	50243.3	61	42	19	13	6	2.58741	1.19419		30.9524	69.0476	31.5789	68.4211
	24hpa 2DG0.5mg 40x 0.6 zoom d1	54376	71	46	25	9	11	1.65514	2.02295		19.5652	80.4348	44	56
	24hpa 2DG0.5mg 40x 0.6 zoom e1	51430.8	59	48	11	13	6	2.52767	1.16662		27.0833	72.9167	54.5455	45.4545
	24hpa 2DG0.5mg 40x 0.6 zoom f1	52113.1	52	37	15	12	6	2.30268	1.15134		32.4324	67.5676	40	60
HC#165_20	24hpa 2DG0.5mg 40x 0.6 zoom a1	39500.2	50	39	11	6	7	1.51898	1.77214		15.3846	84.6154	63.6364	36.3636
	24hpa 2DG0.5mg 40x 0.6 zoom b1	36503.1	52	40	12	7	3	1.91764	0.821847		17.5	82.5	25	75
	24hpa 2DG0.5mg 40x 0.6 zoom c1	40800.9	51	36	15	8	7	1.96074	1.71565		22.2222	77.7778	46.6667	53.3333
HC#166_20	24hpa 2DG0.5mg 40x 0.6 zoom a1	51490.6	27	18	9	5	4	0.971052	0.776841		27.7778	72.2222	44.4444	55.5556
	24hpa 2DG0.5mg 40x 0.6 zoom b1	51419.8	57	41	16	8	3	1.55582	0.583432		19.5122	80.4878	18.75	81.25
	24hpa 2DG0.5mg 40x 0.6 zoom c1	50525.6	49	31	18	9	5	1.78127	0.989597		29.0323	70.9677	27.7778	72.2222
	24hpa 2DG0.5mg 40x 0.6 zoom d1	52317.9	49	31	18	9	4	1.72025	0.764557		29.0323	70.9677	22.2222	77.7778
	24hpa 2DG0.5mg 40x 0.6 zoom e1	53571	31	19	12	3	2	0.560004	0.373336		15.7895	84.2105	16.6667	83.3333
	24hpa 2DG0.5mg 40x 0.6 zoom f1	57387.3	41	29	12	5	3	0.871273	0.522764		17.2414	82.7586	25	75
HC#167_20	24hpa 2DG0.5mg 40x 0.6 zoom a1	47691.4	63	49	14	14	5	2.93554	1.04841		28.5714	71.4286	35.7143	64.2857
	24hpa 2DG0.5mg 40x 0.6 zoom b1	47555.8	66	43	23	4	6	0.841117	1.26168		9.30233	90.6977	26.087	73.913
	24hpa 2DG0.5mg 40x 0.6 zoom c1	48050.7	51	35	16	5	6	1.04057	1.24868		14.2857	85.7143	37.5	62.5
	24hpa 2DG0.5mg 40x 0.6 zoom d1	45059.7	52	39	13	7	4	1.55349	0.887711		17.9487	82.0513	30.7692	69.2308
HC#168_20	24hpa 2DG0.5mg 40x 0.6 zoom a1	42225.9	43	28	15	2	1	0.473643	0.236822		7.14286	92.8571	6.66667	93.3333
	24hpa 2DG0.5mg 40x 0.6 zoom b1	35111.4	38	33	5	2	2	0.569615	0.569615		6.06061	93.9394	40	60
	24hpa 2DG0.5mg 40x 0.6 zoom c1	33466.9	39	37	2	6	0	1.79281	0		16.2162	83.7838	0	100
	24hpa 2DG0.5mg 40x 0.6 zoom d1	30898.5	46	36	10	4	0	1.29456	0		11.1111	88.8889	0	100

## Sheet: Fig5J
										Fig5J
	Biological Replicate	Position	Gene Name	Sample Name	Cq values	Average Cq values House keeping gene (ef1a)	dCq	Log2(-dCq)*100	geoMean	Relative Fold Change
wnt10a	1	A1	Ef1a	PBS	16.35	16.3967						Summary wnt10a relative fold change
		A2	Ef1a		16.42								PBS	2DG	Relative Fold Change
		A3	Ef1a		16.42							Biological Rep 1	0.575886	0.228013	0.395934
		A4	Ef1a	2DG	16.01	16.09						Biological Rep 2	0.705731	0.286616	0.406126
		A5	Ef1a		16.24							Biological Rep 3	0.825795	0.213729	0.258816
		A6	Ef1a		16.02							Biological Rep 4	0.631647	0.322459	0.510506
		B1	wnt10a	PBS	23.87		7.47333	0.562733	0.575886	0.395934		Biological Rep 5	0.397912	0.190852	0.479632
		B2	wnt10a		23.77		7.37333	0.603122				Biological Rep 6	1.08212	0.41577	0.384219
		B3	wnt10a		23.87		7.47333	0.562733				Biological Rep 7	0.800435	0.479806	0.599431
		B4	wnt10a	2DG	24.84		8.75	0.232267	0.228013
		B5	wnt10a		24.82		8.73	0.235509
		B6	wnt10a		24.94		8.85	0.216713
	2	A7	Ef1a	PBS	16.49	16.6233
		A8	Ef1a		16.71
		A9	Ef1a		16.67
		A10	Ef1a	2DG	16.15	16.1367
		A11	Ef1a		16.22
		A12	Ef1a		16.04
		B7	wnt10a	PBS	23.66		7.03667	0.761644	0.705731	0.406126
		B8	wnt10a		24.24		7.61667	0.509513
		B9	wnt10a		23.41		6.78667	0.905753
		B10	wnt10a	2DG	24.51		8.37333	0.301561	0.286616
		B11	wnt10a		24.6		8.46333	0.283324
		B12	wnt10a		24.64		8.50333	0.275576
	3	A1	Ef1a	PBS	16.41	16.5067
		A2	Ef1a		16.63
		A3	Ef1a		16.48
		A4	Ef1a	2DG	16.11	16.1667
		A5	Ef1a		16.11
		A6	Ef1a		16.28
		B1	Wnt10a	PBS	23.52		7.01333	0.774063	0.825795	0.258816
		B2	Wnt10a		23.41		6.90333	0.835391
		B3	Wnt10a		23.35		6.84333	0.870866
		B4	Wnt10a	2DG	25.03		8.86333	0.214719	0.213729
		B5	Wnt10a		25.06		8.89333	0.2103
		B6	Wnt10a		25.02		8.85333	0.216213
	4	A7	Ef1a	PBS	16.39	16.51
		A8	Ef1a		16.71
		A9	Ef1a		16.43
		A10	Ef1a	2DG	16.43	16.4333
		A11	Ef1a		16.56
		A12	Ef1a		16.31
		B7	Wnt10a	PBS	23.97		7.46	0.567958	0.631647	0.510506
		B8	Wnt10a		23.74		7.23	0.666121
		B9	Wnt10a		23.74		7.23	0.666121
		B10	Wnt10a	2DG	24.7		8.26667	0.324702	0.322459
		B11	Wnt10a		24.69		8.25667	0.326961
		B12	Wnt10a		24.74		8.30667	0.315823
	5	A1	Ef1a	PBS	16.41	16.2333
		A2	Ef1a		16.33
		A3	Ef1a		15.96
		A7	Ef1a	2DG	16.23	15.9833
		A8	Ef1a DN		16.08
		A9	Ef1a DN		15.64
		B4	Wnt10a	PBS	24.25		8.01667	0.386138	0.397912	0.479632
		B5	Wnt10a		24.07		7.83667	0.43745
		B6	Wnt10a		24.3		8.06667	0.372985
		B10	Wnt10a	2DG	25		9.01667	0.193069	0.190852
		B11	Wnt10a		25.02		9.03667	0.190411
		B12	Wnt10a		25.03		9.04667	0.189096
	6	A1	Ef1a	PBS	16.8	16.71
		A2	Ef1a		16.6
		A3	Ef1a		16.73
		A7	Ef1a	2DG	16.23	16.1467
		A8	Ef1a		16.17
		A9	Ef1a		16.04
		B4	wnt10a	PBS	23.3		6.59	1.03804	1.08212	0.384219
		B5	wnt10a		23.18		6.47	1.12807
		B6	wnt10a		23.54		6.83	0.878952
		B10	wnt10a	2DG	24.02		7.87333	0.426472	0.41577
		B11	wnt10a		24.06		7.91333	0.41481
		B12	wnt10a		24.09		7.94333	0.406273
	7	A1	Ef1a	PBS	16.57	16.55
		A2	Ef1a		16.48
		A3	Ef1a		16.6
		A7	Ef1a	2DG	17.06	16.9567
		A8	Ef1a		16.81
		A9	Ef1a		17
		B4	wnt10a	PBS	23.61		7.06	0.749425	0.800435	0.599431
		B5	wnt10a		23.42		6.87	0.854917
		B6	wnt10a		23.74		7.19	0.684848
		B10	wnt10a	2DG	24.69		7.73333	0.469932	0.479806
		B11	wnt10a		24.71		7.75333	0.463462
		B12	wnt10a		24.58		7.62333	0.507164
										Fig5J
	Biological Replicate	Position	Gene Name	Sample Name	Cq values	Average Cq values House keeping gene (ef1a)	dCq	Log2(-dCq)*100	geoMean	Relative Fold Change
fgf20a	1	A1	Ef1a PBS	PBS	16.35	16.3967						Summary fgf20a relative fold change
		A2	Ef1a PBS		16.42								PBS	2DG	Fold Change
		A3	Ef1a PBS		16.42							Biological Rep 1	0.0714886	0.0283375	0.396392
		A4	Ef1a 2DG	2DG	16.01	16.09						Biological Rep 2	0.152533	0.0201072	0.131822
		A5	Ef1a 2DG		16.24							Biological Rep 3	0.118574	0.0285017	0.240371
		A6	Ef1a 2DG		16.02							Biological Rep 4	0.0693732	0.0558302	0.80478
		E1	fgf20a PBS	PBS	26.86		10.4633	0.0708309	0.0714886	0.396392		Biological Rep 5	0.0890354	0.0211557	0.23761
		E2	fgf20a PBS		26.78		10.3833	0.0748695				Biological Rep 6	0.207166	0.0663937	0.320486
		E3	fgf20a PBS		26.9		10.5033	0.068894				Biological Rep 7	0.186062	0.105393	0.566442
		E4	fgf20a 2DG	2DG	27.82		11.73	0.0294387	0.0283375			Biological Rep 9	0.164617	0.0549345	0.33371
		E5	fgf20a 2DG		27.64		11.55	0.0333506				Biological Rep 10	0.127378	0.0465155	0.365177
		E6	fgf20a 2DG		27.93		11.84	0.0272775
	2	A7	Ef1a	PBS	16.49	16.6233
		A8	Ef1a		16.71
		A9	Ef1a		16.67
		A10	Ef1a	2DG	16.15	16.1367
		A11	Ef1a		16.22
		A12	Ef1a		16.04
		E7	fgf20a	PBS	25.9		9.27667	0.16123	0.152533	0.131822
		E8	fgf20a		26.3		9.67667	0.122189
		E9	fgf20a		25.74		9.11667	0.18014
		E10	fgf20a	2DG	28.43		12.2933	0.0199222	0.0201072
		E11	fgf20a		28.25		12.1133	0.0225696
		E12	fgf20a		28.57		12.4333	0.0180798
	3	A1	Ef1a	PBS	16.41	16.5067
		A2	Ef1a		16.63
		A3	Ef1a		16.48
		A4	Ef1a	2DG	16.11	16.1667
		A5	Ef1a		16.11
		A6	Ef1a		16.28
		D1	Fgf20a	PBS	26.62		10.1133	0.0902783	0.118574	0.240371
		D2	Fgf20a		26.16		9.65333	0.124182
		D3	Fgf20a		25.9		9.39333	0.148705
		D4	Fgf20a	2DG	27.99		11.8233	0.0275945	0.0285017
		D5	Fgf20a		27.77		11.6033	0.0321402
		D6	Fgf20a		28.07		11.9033	0.026106
	4	A7	Ef1a	PBS	16.39	16.51
		A8	Ef1a		16.71
		A9	Ef1a		16.43
		A10	Ef1a	2DG	16.43	16.4333
		A11	Ef1a		16.56
		A12	Ef1a		16.31
		D7	Fgf20a	PBS	27.1		10.59	0.0648772	0.0693732	0.80478
		D8	Fgf20a		26.75		10.24	0.08269
		D9	Fgf20a		27.16		10.65	0.0622344
		D10	Fgf20a	2DG	27.07		10.6367	0.0628122	0.0558302
		D11	Fgf20a		27.19		10.7567	0.057799
		D12	Fgf20a		27.46		11.0267	0.0479339
	5	A1	Ef1a	PBS	16.41	16.2333
		A2	Ef1a		16.33
		A3	Ef1a		15.96
		A7	Ef1a	2DG	16.23	15.9833
		A8	Ef1a		16.08
		A9	Ef1a		15.64
		D4	Fgf20a	PBS	25.8		9.56667	0.13187	0.0890354	0.23761
		D5	Fgf20a		26.59		10.3567	0.0762663
		D6	Fgf20a		26.71		10.4767	0.0701793
		D10	Fgf20a	2DG	28.11		12.1267	0.0223619	0.0211557
		D11	Fgf20a		28.21		12.2267	0.0208644
		D12	Fgf20a		28.25		12.2667	0.0202939
	6	A1	Ef1a	PBS	16.8	16.71
		A2	Ef1a		16.6
		A3	Ef1a		16.73
		A7	Ef1a	2DG	16.23	16.1467
		A8	Ef1a		16.17
		A9	Ef1a		16.04
		D4	Fgf20a	PBS	25.12		8.41	0.293994	0.207166	0.320486
		D5	Fgf20a		25.75		9.04	0.189972
		D6	Fgf20a		25.5		8.79	0.225916
		D10	Fgf20a	2DG	26.67		10.5233	0.0679455	0.0663937
		D11	Fgf20a		26.77		10.6233	0.0633954
		D12	Fgf20a		26.67		10.5233	0.0679455
	7	A1	Ef1a	PBS	16.57	16.55
		A2	Ef1a		16.48
		A3	Ef1a		16.6
		A7	Ef1a	2DG	17.06	16.9567
		A8	Ef1a		16.81
		A9	Ef1a		17
		D4	Fgf20a	PBS	25.66		9.11	0.180974	0.186062	0.566442
		D5	Fgf20a		25.35		8.8	0.224355
		D6	Fgf20a		25.85		9.3	0.158643
		D10	Fgf20a	2DG	27.04		10.0833	0.0921752	0.105393
		D11	Fgf20a		26.97		10.0133	0.0967579
		D12	Fgf20a		26.53		9.57333	0.131262
	9	A1	Ef1a	PBS	16.51	16.4067
		A2	Ef1a		16.4
		A3	Ef1a		16.31
		A7	Ef1a	2DG	16.61	16.46
		A8	Ef1a		16.05
		A9	Ef1a		16.31
		D4	Fgf20a	PBS	25.79		9.38333	0.149739	0.164617	0.33371
		D5	Fgf20a		25.45		9.04333	0.189533
		D6	Fgf20a		25.72		9.31333	0.157184
		D10	Fgf20a	2DG	27.6		11.14	0.0443125	0.0549345
		D11	Fgf20a		27.16		10.7	0.0601145
		D12	Fgf20a		27.11		10.65	0.0622344
	10	A1	Ef1a	PBS	15.51	15.9867
		A2	Ef1a		16.2
		A3	Ef1a		16.25
		A7	Ef1a	2DG	15.89	15.9567
		A8	Ef1a		16.09
		A9	Ef1a		15.89
		D4	fgf20a	PBS	25.4		9.41333	0.146658	0.127378	0.365177
		D5	fgf20a		25.42		9.43333	0.144638
		D6	fgf20a		25.99		10.0033	0.0974309
		D10	fgf20a	2DG	26.86		10.9033	0.0522119	0.0465155
		D11	fgf20a		27.42		10.9033	0.0522119
		D12	fgf20a		27.36		11.4033	0.0369194
										Fig5J
	Biological Replicate	Position	Gene Name	Sample Name	Cq values	Average Cq values House keeping gene (ef1a)	dCq	Log2(-dCq)*100	geoMean	Relative Fold Change
irs2b	1	A1	Ef1a	PBS	16.68	16.56						Summary irs2b relative fold change
		A2	Ef1a		16.62								PBS	2DG	Fold Change
		A3	Ef1a		16.38							Biological Rep 1	0.856895	0.247218	0.288505
		A4	Ef1a	2DG	16.08	16.16						Biological Rep 2	0.646232	0.359448	0.556222
		A5	Ef1a		16.1							Biological Rep 3	0.79202	0.130959	0.165348
		A6	Ef1a		16.3							Biological Rep 4	0.893007	0.192179	0.215204
		C1	irs2b	PBS	23.37		6.81	0.891222	0.856895	0.288505		Biological Rep 5	0.489888	0.394252	0.80478
		C2	irs2b		23.55		6.99	0.786684				Biological Rep 6	0.74597	0.468847	0.628507
		C3	irs2b		23.36		6.8	0.897421				Biological Rep 7	1.12937	0.529924	0.469219
		C4	irs2b	2DG	24.7		8.54	0.268661	0.247218
		C5	irs2b		24.9		8.74	0.233883
		C6	irs2b		24.86		8.7	0.240458
	2	A7	Ef1a	PBS	16.5	16.4396
		A8	Ef1a		16.28
		A9	Ef1a		16.54
		A10	Ef1a	2DG	16.26	16.1867
		A11	Ef1a		16.18
		A12	Ef1a		16.12
		C7	irs2b	PBS	23.47		7.0304	0.764961	0.646232	0.556222
		C8	irs2b		23.86		7.4204	0.583764
		C9	irs2b		23.81		7.3704	0.604351
		C10	irs2b	2DG	24.51		8.32333	0.312196	0.359448
		C11	irs2b		24.35		8.16333	0.348812
		C12	irs2b		24.06		7.87333	0.426472
	3	A1	Ef1a	PBS	16.42	16.4331
		A2	Ef1a		16.55
		A3	Ef1a		16.33
		A4	Ef1a	2DG	15.84	15.88
		A5	Ef1a		15.86
		A6	Ef1a		15.94
		C1	irs2b	PBS	23.33		6.89691	0.839116	0.79202	0.165348
		C2	irs2b		23.56		7.12691	0.715459
		C3	irs2b		23.35		6.91691	0.827563
		C4	irs2b	2DG	25.37		9.49	0.139067	0.130959
		C5	irs2b		25.49		9.61	0.127968
		C6	irs2b		25.51		9.63	0.126206
	4	A7	Ef1a	PBS	16.41	16.2962
		A8	Ef1a		16.13
		A9	Ef1a		16.35
		A10	Ef1a	2DG	15.85	15.8733
		A11	Ef1a		15.73
		A12	Ef1a		16.04
		C7	irs2b	PBS	23.3		7.00378	0.779206	0.893007	0.215204
		C8	irs2b		23.04		6.74378	0.933083
		C9	irs2b		22.97		6.67378	0.979473
		C10	irs2b	2DG	24.92		9.04667	0.189096	0.192179
		C11	irs2b		24.75		8.87667	0.212744
		C12	irs2b		25.02		9.14667	0.176433
	5	A1	Ef1a	PBS	17.06	17.0067
		A2	Ef1a		16.89
		A3	Ef1a		17.07
		A7	Ef1a	2DG	16.76	16.69
		A8	Ef1a		16.6
		A9	Ef1a		16.71
		C4	irs2b	PBS	24.61		7.60333	0.514243	0.489888	0.80478
		C5	irs2b		24.64		7.63333	0.50366
		C6	irs2b		24.79		7.78333	0.453924
		C10	irs2b	2DG	24.64		7.95	0.4044	0.394252
		C11	irs2b		24.67		7.98	0.396078
		C12	irs2b		24.72		8.03	0.382586
	6	A1	Ef1a	PBS	16.5	16.5067
		A2	Ef1a		16.47
		A3	Ef1a		16.55
		A7	Ef1a	2DG	16.51	16.4767
		A8	Ef1a		16.42
		A9	Ef1a		16.5
		D1	irs2b	PBS	23.52		7.01333	0.774063	0.74597	0.628507
		D2	irs2b		23.72		7.21333	0.673861
		D3	irs2b		23.48		6.97333	0.795825
		D7	irs2b	2DG	24.43		7.95333	0.403467	0.468847
		D8	irs2b		24.09		7.61333	0.510691
		D9	irs2b		24.12		7.64333	0.500181
	7	A1	Ef1a	PBS	16.71	16.6067
		A2	Ef1a		16.4
		A3	Ef1a		16.71
		A7	Ef1a	2DG	17.12	17.03
		A8	Ef1a		16.96
		A9	Ef1a		17.01
		D1	irs2b	PBS	23.54		6.93333	0.818199	1.12937	0.469219
		D2	irs2b		23.13		6.52333	1.08713
		D3	irs2b		23.02		6.41333	1.17326
		D7	irs2b	2DG	24.64		7.61	0.511872	0.529924
		D8	irs2b		24.54		7.51	0.548611
		D9	irs2b		24.78		7.75	0.464534
