# Supplementary material for: A regeneration-triggered metabolic adaptation is necessary for cell identity transitions and cell cycle re-entry to support blastema formation and bone regeneration
Source: eLife. 2022 Aug 22;11:e76987. doi: 10.7554/eLife.76987 (PMC9395193; doi:10.7554/eLife.76987)
Supplement: Figure 6—figure supplement 1—source data 1. [file elife-76987-fig6-figsupp1-data1.xlsx]

## Sheet: Fig6 – Figure Suppl1 K and L
Control (DMSO condition)
Number of fish	Fin Cryosection Internal reference (File name)
					Supp Fig 6L Control (DMSO) column	Supp Fig 6K Control (DMSO) column
		number of osx+ runx2 + cells	number of runx2+ cells	Fin Area	number of osx+ runx2 + cells per 100um	number of runx2+ cells per 100um	racio runx2+ osx-/osx+ runx2 +
#1	149 18 48hpa osxmcherryNTR PCNA488 Runx2 Cy5 DMSO 40x zoom 0.6 a1 a2 P1	75	57	54677.1	13.7169	10.4248	0.76
	149 18 48hpa osxmcherryNTR PCNA488 Runx2 Cy5 DMSO 40x zoom 0.6 b1 b2 P1	113	74	69370.5	16.2893	10.6674	0.654867
	149 18 48hpa osxmcherryNTR PCNA488 Runx2 Cy5 DMSO 40x zoom 0.6 c1 c2 P1	66	72	69789.9	9.45696	10.3167	1.09091
	149 18 48hpa osxmcherryNTR PCNA488 Runx2 Cy5 DMSO 40x zoom 0.6 d1 d2 P1	102	75	57189.8	17.8353	13.1142	0.735294
#2	150 18 48hpa osxmcherryNTR PCNA488 Runx2 Cy5 DMSO 40x zoom 0.6 a1 a2 P2	47	75	88323.1	5.32137	8.49155	1.59574
	150 18 48hpa osxmcherryNTR PCNA488 Runx2 Cy5 DMSO 40x zoom 0.6 b1 b3 P2	93	78	73859.3	12.5915	10.5606	0.83871
	150 18 48hpa osxmcherryNTR PCNA488 Runx2 Cy5 DMSO 40x zoom 0.6 c1 c3 P2	96	80	79876.2	12.0186	10.0155	0.833333
	150 18 48hpa osxmcherryNTR PCNA488 Runx2 Cy5 DMSO 40x zoom 0.6 d1 d2 P2	91	59	56513	16.1025	10.4401	0.648352
	150 18 48hpa osxmcherryNTR PCNA488 Runx2 Cy5 DMSO 40x zoom 0.6 e1 e3 P2	114	61	72727.5	15.675	8.38747	0.535088
	150 18 48hpa osxmcherryNTR PCNA488 Runx2 Cy5 DMSO 40x zoom 0.6 f1 f2 P2	64	65	56110.1	11.4061	11.5844	1.01562
#3	151 18 48hpa osxmcherryNTR PCNA488 Runx2 Cy5 DMSO 40x zoom 0.6 a1 a2 P3	60	40	70671.3	8.49001	5.66001	0.666667
	151 18 48hpa osxmcherryNTR PCNA488 Runx2 Cy5 DMSO 40x zoom 0.6 b1 b3 P3	45	43	69248.5	6.49834	6.20952	0.955556
	151 18 48hpa osxmcherryNTR PCNA488 Runx2 Cy5 DMSO 40x zoom 0.6 c1 c2 P3	48	57	63402.5	7.57068	8.99018	1.1875
#4	152 18 48hpa osxmcherryNTR PCNA488 Runx2 Cy5 DMSO 40x zoom 0.6 a1 a2 P4	94	66	55704.8	16.8747	11.8482	0.702128
	152 18 48hpa osxmcherryNTR PCNA488 Runx2 Cy5 DMSO 40x zoom 0.6 b1 b2 P4	94	88	57808.7	16.2605	15.2226	0.93617
	152 18 48hpa osxmcherryNTR PCNA488 Runx2 Cy5 DMSO 40x zoom 0.6 c1 c2 P4	119	83	55027.7	21.6255	15.0833	0.697479
	152 18 48hpa osxmcherryNTR PCNA488 Runx2 Cy5 DMSO 40x zoom 0.6 d1 d3 P4	99	68	74530	13.2832	9.12384	0.686869
	152 18 48hpa osxmcherryNTR PCNA488 Runx2 Cy5 DMSO 40x zoom 0.6 e1 e3 P4	84	98	73225.8	11.4714	13.3833	1.16667
3PO condition
Number of fish	Fin Cryosection Internal reference (File name)
					Supp Fig 6L 3PO column	Supp Fig 6K 3PO column
		number of osx+ runx2 + cells	number of runx2+ cells	Fin Area	number of osx+ runx2 + cells per 100um	number of runx2+ cells per 100um	racio runx2+ osx-/osx+ runx2 +
#1	153 18 48hpa osxmcherryNTR PCNA488 Runx2 Cy5 3PO 40x zoom 0.6 a1 P1	43	69	51708.7	8.31581	13.344	1.60465
	153 18 48hpa osxmcherryNTR PCNA488 Runx2 Cy5 3PO 40x zoom 0.6 b1 P1	38	60	46626.6	8.14985	12.8682	1.57895
	153 18 48hpa osxmcherryNTR PCNA488 Runx2 Cy5 3PO 40x zoom 0.6 c P1	56	93	69131.2	8.10053	13.4527	1.66071
	153 18 48hpa osxmcherryNTR PCNA488 Runx2 Cy5 3PO 40x zoom 0.6 d P1	30	80	58817.6	5.10052	13.6014	2.66667
#2	154 18 48hpa osxmcherryNTR PCNA488 Runx2 Cy5 3PO 40x zoom 0.6 a P2	14	52	71719.3	1.95206	7.25049	3.71429
	154 18 48hpa osxmcherryNTR PCNA488 Runx2 Cy5 3PO 40x zoom 0.6 b1 P2	25	20	20854.6	11.9878	9.59021	0.8
	154 18 48hpa osxmcherryNTR PCNA488 Runx2 Cy5 3PO 40x zoom 0.6 c1 P2	20	16	28229.5	7.08479	5.66783	0.8
	154 18 48hpa osxmcherryNTR PCNA488 Runx2 Cy5 3PO 40x zoom 0.6 d P2	10	39	38571.9	2.59256	10.111	3.9
#3	155 18 48hpa osxmcherryNTR PCNA488 Runx2 Cy5 3PO 40x zoom 0.6 a P3	37	61	71944.4	5.14286	8.47877	1.64865
	155 18 48hpa osxmcherryNTR PCNA488 Runx2 Cy5 3PO 40x zoom 0.6 b P3	32	69	79525.7	4.02386	8.67644	2.15625
	155 18 48hpa osxmcherryNTR PCNA488 Runx2 Cy5 3PO 40x zoom 0.6 c P3	34	39	74670.1	4.55336	5.22297	1.14706
#4	156 18 48hpa osxmcherryNTR PCNA488 Runx2 Cy5 3PO 40x zoom 0.6 a P4	4	33	75784.5	0.527813	4.35445	8.25
	156 18 48hpa osxmcherryNTR PCNA488 Runx2 Cy5 3PO 40x zoom 0.6 b P4	34	44	71756	4.73828	6.13189	1.29412
	156 18 48hpa osxmcherryNTR PCNA488 Runx2 Cy5 3PO 40x zoom 0.6 c P4	27	39	67963	3.97275	5.73842	1.44444
	156 18 48hpa osxmcherryNTR PCNA488 Runx2 Cy5 3PO 40x zoom 0.6 d P4	39	31	74013.4	5.26932	4.18843	0.794872
#5	157 18 48hpa osxmcherryNTR PCNA488 Runx2 Cy5 3PO 40x zoom 0.6 a P5	12	12	33449.6	3.58749	3.58749	1
	157 18 48hpa osxmcherryNTR PCNA488 Runx2 Cy5 3PO 40x zoom 0.6 b P5	3	22	37905.2	0.791449	5.80396	7.33333
	157 18 48hpa osxmcherryNTR PCNA488 Runx2 Cy5 3PO 40x zoom 0.6 c P5	6	9	6347.44	9.45262	14.1789	1.5
	157 18 48hpa osxmcherryNTR PCNA488 Runx2 Cy5 3PO 40x zoom 0.6 d P5	5	8	7479.71	6.68475	10.6956	1.6
