# Supplementary material for: A regeneration-triggered metabolic adaptation is necessary for cell identity transitions and cell cycle re-entry to support blastema formation and bone regeneration
Source: eLife. 2022 Aug 22;11:e76987. doi: 10.7554/eLife.76987 (PMC9395193; doi:10.7554/eLife.76987)
Supplement: Figure 6—figure supplement 2—source data 1. [file elife-76987-fig6-figsupp2-data1.xlsx]

## Sheet: Fig6 – Figure Suppl2 G and H
Control (PBS1x condition)
												Supp Fig 7G Column PCNA PBS1x 0-36hpa	Supp Fig 7H Column PCNA PBS1x 0-36hpa	Supp Fig 7G Column EdU PBS1x 0-36hpa	Supp Fig 7H Column EdU PBS1x 0-36hpa
Number of fish	Fin Cryosection Internal reference (File name)
		total area epidermis	total area mesenchyme	total blastema area	number of PCNA+ cells in epidermis	number of PCNA+ cells in mesenchyme	Total number of PCNA+ cells		number of EdU+ cells in epidermis	number of EdU+ cells in mesenchyme	Total number of EdU+ cells	number of PCNA + cells in epidermis per 100um2	number of of PCNA+ cells in mesenchyme per 100um2	number of EdU + cells in epidermis per 100um2	number of EdU+ cells in mesenchyme per 100um2	total number of PCNA+ cells	Total nº of EdU + cells
HC169_20	48hpa Control PBS OsxmCherry568 EdU488 PCNA647 40x 0,6 b	25489.8	15113.2	40603	65	114	179		60	112	172	25.5004	75.4307	23.5388	74.1074	44.0854	42.3614
	48hpa Control PBS OsxmCherry568 EdU488 PCNA647 40x 0,6 c	27911.5	23431.4	51342.9	113	240	353		51	128	179	40.4851	102.427	18.272	54.6276	68.7534	34.8636
	48hpa Control PBS OsxmCherry568 EdU488 PCNA647 40x 0,6 d	31352	26106.1	57458.1	164	188	352		51	119	170	52.3093	72.0138	16.2669	45.5832	61.262	29.5868
	48hpa Control PBS OsxmCherry568 EdU488 PCNA647 40x 0,6 e	28295.5	31676.7	59972.2	96	301	397		45	153	198	33.9277	95.0225	15.9036	48.3005	66.1973	33.0153
	48hpa Control PBS OsxmCherry568 EdU488 PCNA647 40x 0,6 f	26320.6	34570.1	60890.7	105	292	397		42	152	194	39.8927	84.4661	15.9571	43.9686	65.1988	31.8604
HC847_19	48hpa Control PBS OsxmCherry568 EdU488 PCNA647 40x 0,6 a	22462.7	31372.5	53835.2	61	257	318		52	137	189	27.1561	81.9189	23.1495	43.6688	59.0692	35.1071
	48hpa Control PBS OsxmCherry568 EdU488 PCNA647 40x 0,6 b1	22044.1	29838.8	51882.9	45	158	203		21	84	105	20.4136	52.9512	9.52637	28.1513	39.1266	20.2379
HC848_19	48hpa Control PBS OsxmCherry568 EdU488 PCNA647 40x 0,6 b	25230.3	27378.5	52608.8	112	328	440		65	158	223	44.3911	119.802	25.7627	57.7095	83.6362	42.3883
	48hpa Control PBS OsxmCherry568 EdU488 PCNA647 40x 0,6 c	22970.9	42413.2	65384.1	170	394	564		66	188	254	74.0067	92.8956	28.732	44.3258	86.2595	38.8474
	48hpa Control PBS OsxmCherry568 EdU488 PCNA647 40x 0,6 d	24396.5	32179.8	56576.3	172	316	488		59	147	206	70.5019	98.1982	24.1838	45.6808	86.2552	36.411
	48hpa Control PBS OsxmCherry568 EdU488 PCNA647 40x 0,6 f	22428.5	40423.8	62852.3	103	393	496		51	164	215	45.9237	97.22	22.7389	40.5702	78.9152	34.2072
HC849_19	48hpa Control PBS OsxmCherry568 EdU488 PCNA647 40x 0,6 a	26938.6	42260.9	69199.5	145	320	465		55	230	285	53.8261	75.7201	20.4168	54.4238	67.197	41.1853
	48hpa Control PBS OsxmCherry568 EdU488 PCNA647 40x 0,6 c	31566	29076.1	60642.1	129	175	304		60	161	221	40.8668	60.1869	19.0078	55.3719	50.1302	36.4433
	48hpa Control PBS OsxmCherry568 EdU488 PCNA647 40x 0,6 e	30269.4	26354.6	56624	175	185	360		72	147	219	57.8142	70.1965	23.7864	55.7777	63.5773	38.6762
	48hpa Control PBS OsxmCherry568 EdU488 PCNA647 40x 0,6 f	30195.1	25125.5	55320.6	94	134	228		82	140	222	31.1309	53.3323	27.1567	55.7203	41.2143	40.1297
HC850_19	48hpa Control PBS OsxmCherry568 EdU488 PCNA647 40x 0,6 a	35465.5	19669.2	55134.7	196	142	338		97	71	168	55.265	72.1941	27.3505	36.097	61.3044	30.4708
	48hpa Control PBS OsxmCherry568 EdU488 PCNA647 40x 0,6 b	32898.7	26484.9	59383.6	253	154	407		66	95	161	76.9027	58.1463	20.0616	35.8695	68.5374	27.1119
	48hpa Control PBS OsxmCherry568 EdU488 PCNA647 40x 0,6 c	27327.5	32140.2	59467.7	145	241	386		72	130	202	53.0601	74.984	26.3471	40.4478	64.9092	33.968
	48hpa Control PBS OsxmCherry568 EdU488 PCNA647 40x 0,6 d	30839.7	36744.6	67584.3	225	367	592		69	163	232	72.9579	99.8786	22.3738	44.3603	87.5943	34.3275
	48hpa Control PBS OsxmCherry568 EdU488 PCNA647 40x 0,6 e	31267.3	35010.5	66277.8	173	288	461		49	136	185	55.3294	82.261	15.6713	38.8455	69.5557	27.9128
HC851_19	48hpa Control PBS OsxmCherry568 EdU488 PCNA647 40x 0,6 a	33351	52009.1	85360.1	105	261	366		102	177	279	31.4833	50.1835	30.5838	34.0325	42.8772	32.6851
	48hpa Control PBS OsxmCherry568 EdU488 PCNA647 40x 0,6 b	38394.6	34863.3	73257.9	339	264	603		76	137	213	88.2937	75.7243	19.7945	39.2963	82.3119	29.0754
	48hpa Control PBS OsxmCherry568 EdU488 PCNA647 40x 0,6 c	36197.1	36551.7	72748.8	187	212	399		73	119	192	51.6616	58	20.1674	32.5566	54.8463	26.3922
	48hpa Control PBS OsxmCherry568 EdU488 PCNA647 40x 0,6 e	36164.7	38840.2	75004.9	94	175	269		82	125	207	25.9922	45.0564	22.674	32.1832	35.8643	27.5982
	48hpa Control PBS OsxmCherry568 EdU488 PCNA647 40x 0,6 g	31371.4	28929.7	60301.1	112	109	221		95	99	194	35.7013	37.6775	30.2824	34.2209	36.6494	32.1719
2DG condition
Number of fish	Fin Cryosection Internal reference (File name)											Supp Fig 7G Column PCNA 2DG 0-36hpa	Supp Fig 7H Column PCNA 2DG 0-36hpa	Supp Fig 7G Column EdU 2DG 0-36hpa	Supp Fig 7H Column EdU 2DG 0-36hpa
		total area epidermis	total area mesenchyme	total blastema area	number of PCNA+ cells in epidermis	number of PCNA+ cells in mesenchyme	Total number of PCNA+ cells		number of EdU+ cells in epidermis	number of EdU+ cells in mesenchyme	Total number of EdU+ cells	number of PCNA + cells in epidermis per 100um2	number of of PCNA+ cells in mesenchyme per 100um2	number of EdU + cells in epidermis per 100um2	number of EdU+ cells in mesenchyme per 100um2	total number of PCNA+ cells	Total nº of EdU + cells
HC170_20	48hpa 2DG0,5mg OsxmCherry568 EdU488 PCNA647 40x 0,6 a1	14768.2	29016.4	43784.5	38	39	77		30	14	44	25.731	13.4407	20.3139	4.82486	17.5861	10.0492
	48hpa 2DG0,5mg OsxmCherry568 EdU488 PCNA647 40x 0,6 b1	18594.1	23769.1	42363.3	42	57	99		33	27	60	22.5878	23.9807	17.7475	11.3593	23.3693	14.1632
	48hpa 2DG0,5mg OsxmCherry568 EdU488 PCNA647 40x 0,6 c1	19190.9	22865.7	42056.5	43	64	107		36	29	65	22.4065	27.9896	18.7589	12.6828	25.442	15.4554
	48hpa 2DG0,5mg OsxmCherry568 EdU488 PCNA647 40x 0,6 d1	19349.3	22276.9	41626.2	58	55	113		32	12	44	29.9752	24.6893	16.5381	5.38676	27.1464	10.5703
	48hpa 2DG0,5mg OsxmCherry568 EdU488 PCNA647 40x 0,6 e1	24687.9	12817.2	37505.1	62	31	93		55	16	71	25.1135	24.1862	22.2781	12.4832	24.7966	18.9308
	48hpa 2DG0,5mg OsxmCherry568 EdU488 PCNA647 40x 0,6 g1	19379.5	17936.3	37315.7	16	14	30		32	10	42	8.25616	7.80541	16.5123	5.57529	8.0395	11.2553
HC171_20	48hpa 2DG0,5mg OsxmCherry568 EdU488 PCNA647 40x 0,6 a1	21084.2	20044.3	41128.4	56	35	91		19	15	34	26.5602	17.4613	9.01151	7.48343	22.1258	8.26679
	48hpa 2DG0,5mg OsxmCherry568 EdU488 PCNA647 40x 0,6 b1	21347.9	19419.9	40767.8	59	38	97		25	21	46	27.6374	19.5675	11.7107	10.8136	23.7933	11.2834
	48hpa 2DG0,5mg OsxmCherry568 EdU488 PCNA647 40x 0,6 c1	19550	17463.8	37013.8	51	49	100		25	24	49	26.0869	28.0581	12.7877	13.7427	27.017	13.2383
	48hpa 2DG0,5mg OsxmCherry568 EdU488 PCNA647 40x 0,6 d1	18937.6	18346.1	37283.7	31	37	68		17	30	47	16.3695	20.1678	8.97684	16.3523	18.2385	12.6061
	48hpa 2DG0,5mg OsxmCherry568 EdU488 PCNA647 40x 0,6 f1	18098.4	19687.8	37786.2	43	50	93		28	34	62	23.759	25.3965	15.4709	17.2696	24.6122	16.4081
											0
HC172_20	48hpa 2DG0,5mg OsxmCherry568 EdU488 PCNA647 40x 0,6 a1	21920.7	20290	42210.7	61	73	134		32	39	71	27.8276	35.9784	14.5981	19.2213	31.7455	16.8204
	48hpa 2DG0,5mg OsxmCherry568 EdU488 PCNA647 40x 0,6 b1	21198.4	20830.2	42028.6	66	79	145		29	26	55	31.1344	37.9257	13.6803	12.4819	34.5003	13.0863
	48hpa 2DG0,5mg OsxmCherry568 EdU488 PCNA647 40x 0,6 c1	25471.2	22510.5	47981.6	59	68	127		31	15	46	23.1635	30.2082	12.1706	6.66357	26.4685	9.587
	48hpa 2DG0,5mg OsxmCherry568 EdU488 PCNA647 40x 0,6 d1	23086	17649.3	40735.3	63	88	151		28	19	47	27.2893	49.8604	12.1286	10.7653	37.0686	11.5379
	48hpa 2DG0,5mg OsxmCherry568 EdU488 PCNA647 40x 0,6 e1	22462.5	18820.7	41283.2	66	77	143		41	24	65	29.3823	40.9124	18.2527	12.7519	34.6388	15.7449
	48hpa 2DG0,5mg OsxmCherry568 EdU488 PCNA647 40x 0,6 g1	32720.5	12310.1	45030.6	55	32	87		51	10	61	16.809	25.9949	15.5866	8.12339	19.3202	13.5463
HC172_20	48hpa 2DG0,5mg OsxmCherry568 EdU488 PCNA647 40x 0,6 b1	19321.9	23661.3	42983.2	73	121	194		49	39	88	37.781	51.1384	25.3598	16.4826	45.1339	20.4731
	48hpa 2DG0,5mg OsxmCherry568 EdU488 PCNA647 40x 0,6 c1	17051.5	31487.3	48538.8	33	87	120		20	42	62	19.3531	27.6302	11.7292	13.3387	24.7225	12.7733
	48hpa 2DG0,5mg OsxmCherry568 EdU488 PCNA647 40x 0,6 d1	18148.8	29711.1	47859.9	45	154	199		21	65	86	24.795	51.8325	11.571	21.8774	41.5797	17.9691
	48hpa 2DG0,5mg OsxmCherry568 EdU488 PCNA647 40x 0,6 e1	14381	29283.1	43664.1	34	81	115		34	36	70	23.6423	27.661	23.6423	12.2938	26.3374	16.0315
	48hpa 2DG0,5mg OsxmCherry568 EdU488 PCNA647 40x 0,6 f1	15629.7	26534.4	42164.1	72	134	206		50	39	89	46.066	50.5005	31.9903	14.6979	48.8567	21.108
HC173_20	48hpa 2DG0,5mg OsxmCherry568 EdU488 PCNA647 40x 0,6 a1	15853.5	27407.8	43261.3	21	59	80		13	12	25	13.2463	21.5267	8.20006	4.37832	18.4923	5.77883
	48hpa 2DG0,5mg OsxmCherry568 EdU488 PCNA647 40x 0,6 b1	14970.9	21707	36677.9	44	64	108		28	6	34	29.3903	29.4836	18.7029	2.76409	29.4456	9.2699
	48hpa 2DG0,5mg OsxmCherry568 EdU488 PCNA647 40x 0,6 c1	14024.4	25465.8	39490.2	20	38	58		14	18	32	14.2609	14.922	9.98261	7.06831	14.6872	8.10328
	48hpa 2DG0,5mg OsxmCherry568 EdU488 PCNA647 40x 0,6 d1	18265.3	23861.3	42126.5	43	73	116		15	10	25	23.5419	30.5935	8.21231	4.19089	27.5361	5.9345
	48hpa 2DG0,5mg OsxmCherry568 EdU488 PCNA647 40x 0,6 e1	15758.2	26557.5	42315.6	52	58	110		18	15	33	32.9988	21.8394	11.4227	5.64813	25.9951	7.79854
	48hpa 2DG0,5mg OsxmCherry568 EdU488 PCNA647 40x 0,6 g1	16410	24251.8	40661.8	46	61	107		8	7	15	28.0316	25.1528	4.87507	2.88639	26.3146	3.68897
	48hpa 2DG0,5mg OsxmCherry568 EdU488 PCNA647 40x 0,6 i1	13741.9	15476.3	29218.3	13	44	57		15	9	24	9.46009	28.4305	10.9155	5.81534	19.5083	8.21404
