# Supplementary material for: A regeneration-triggered metabolic adaptation is necessary for cell identity transitions and cell cycle re-entry to support blastema formation and bone regeneration
Source: eLife. 2022 Aug 22;11:e76987. doi: 10.7554/eLife.76987 (PMC9395193; doi:10.7554/eLife.76987)
Supplement: Figure 6—figure supplement 3—source data 1. [file elife-76987-fig6-figsupp3-data1.xlsx]

## Sheet: Fig6 – Figure Suppl8 C
Control (PBS) for 2DG
				Sup Fig8C PBS 0-36hpa Column
Number of fish	Fin Cryosection Internal reference (File name)	Fin area	number of runx2+bglap+	Nº of runx2+bglap+ per 100um2
HC247_21	48hpa OscGFP488 EdU647 PBS 1x 40x 0.6 zoom a	88015.9	36	4.09017
	48hpa OscGFP488 EdU647 PBS 1x 40x 0.6 zoom b	85081.1	35	4.11372
	48hpa OscGFP488 EdU647 PBS 1x 40x 0.6 zoom c	84245.7	41	4.86672
	48hpa OscGFP488 EdU647 PBS 1x 40x 0.6 zoom d	88331.6	30	3.39629
	48hpa OscGFP488 EdU647 PBS 1x 40x 0.6 zoom e	85920.2	30	3.49161
	48hpa OscGFP488 EdU647 PBS 1x 40x 0.6 zoom f	77980.3	36	4.61655
HC248_21	48hpa OscGFP488 EdU647 PBS 1x 40x 0.6 zoom a	109511	18	1.64368
	48hpa OscGFP488 EdU647 PBS 1x 40x 0.6 zoom b	100951	27	2.67456
	48hpa OscGFP488 EdU647 PBS 1x 40x 0.6 zoom c	94969.1	30	3.15892
	48hpa OscGFP488 EdU647 PBS 1x 40x 0.6 zoom d	96428.6	20	2.07407
	48hpa OscGFP488 EdU647 PBS 1x 40x 0.6 zoom e	75401	35	4.64185
HC249_21	48hpa OscGFP488 EdU647 PBS 1x 40x 0.6 zoom a	108340	31	2.86137
	48hpa OscGFP488 EdU647 PBS 1x 40x 0.6 zoom c	93712.1	32	3.41471
	48hpa OscGFP488 EdU647 PBS 1x 40x 0.6 zoom d	97038.2	47	4.84345
	48hpa OscGFP488 EdU647 PBS 1x 40x 0.6 zoom f	79597	14	1.75886
	48hpa OscGFP488 EdU647 PBS 1x 40x 0.6 zoom e	95338.4	26	2.72713
HC250_21	48hpa OscGFP488 EdU647 PBS 1x 40x 0.6 zoom a	81600.2	49	6.00489
	48hpa OscGFP488 EdU647 PBS 1x 40x 0.6 zoom b	77800	51	6.55527
	48hpa OscGFP488 EdU647 PBS 1x 40x 0.6 zoom d	86769.6	50	5.76239
HC251_21	48hpa OscGFP488 EdU647 PBS 1x 40x 0.6 zoom a	111628	17	1.52291
	48hpa OscGFP488 EdU647 PBS 1x 40x 0.6 zoom c	117291	22	1.87567
	48hpa OscGFP488 EdU647 PBS 1x 40x 0.6 zoom e	110201	26	2.35932
	48hpa OscGFP488 EdU647 PBS 1x 40x 0.6 zoom f	115855	47	4.05679
HC251_21	48hpa OscGFP488 EdU647 PBS 1x 40x 0.6 zoom a	107216	34	3.17117
	48hpa OscGFP488 EdU647 PBS 1x 40x 0.6 zoom b	104593	32	3.05948
	48hpa OscGFP488 EdU647 PBS 1x 40x 0.6 zoom d	81797.3	31	3.78986
	48hpa OscGFP488 EdU647 PBS 1x 40x 0.6 zoom e	83160.2	33	3.96824
2DG Condition
				Sup Fig8C 2DG 0-36hpa Column
Number of fish	Fin Cryosection Internal reference (File name)	Fin area	number of runx2+bglap+	Nº of runx2+bglap+ per 100um2
HC254_21	48hpa OscGFP488 EdU647 2DG 40x 0.6 zoom a	57052.9	23	4.03135
	48hpa OscGFP488 EdU647 2DG 40x 0.6 zoom b	59683.6	20	3.35101
	48hpa OscGFP488 EdU647 2DG 40x 0.6 zoom c	54564.2	18	3.29887
	48hpa OscGFP488 EdU647 2DG 40x 0.6 zoom d	60465.5	28	4.63074
	48hpa OscGFP488 EdU647 2DG 40x 0.6 zoom e	62613.5	23	3.67333
	48hpa OscGFP488 EdU647 2DG 40x 0.6 zoom f	64726.6	13	2.00845
HC255_21	48hpa OscGFP488 EdU647 2DG 40x 0.6 zoom a	60094.9	17	2.82886
	48hpa OscGFP488 EdU647 2DG 40x 0.6 zoom b	62946.1	32	5.08371
	48hpa OscGFP488 EdU647 2DG 40x 0.6 zoom c	61573.8	17	2.76092
	48hpa OscGFP488 EdU647 2DG 40x 0.6 zoom d	53780.8	19	3.53286
	48hpa OscGFP488 EdU647 2DG 40x 0.6 zoom e	60315.5	23	3.81328
	48hpa OscGFP488 EdU647 2DG 40x 0.6 zoom f	60472.9	21	3.47263
HC256_21	48hpa OscGFP488 EdU647 2DG 40x 0.6 zoom a	69844.3	20	2.86351
	48hpa OscGFP488 EdU647 2DG 40x 0.6 zoom b	69450	25	3.59971
	48hpa OscGFP488 EdU647 2DG 40x 0.6 zoom c	66048.7	21	3.17947
	48hpa OscGFP488 EdU647 2DG 40x 0.6 zoom d	65600.9	17	2.59143
	48hpa OscGFP488 EdU647 2DG 40x 0.6 zoom e	66396.8	26	3.91585
	48hpa OscGFP488 EdU647 2DG 40x 0.6 zoom g	63730	19	2.98133
HC958_21	48hpa OscGFP488 EdU647 2DG 40x 0.6 zoom a	61885.7	9	1.45429
	48hpa OscGFP488 EdU647 2DG 40x 0.6 zoom b	59556.5	15	2.51862
	48hpa OscGFP488 EdU647 2DG 40x 0.6 zoom c	60343.3	9	1.49147
	48hpa OscGFP488 EdU647 2DG 40x 0.6 zoom d	58452.4	15	2.56619
	48hpa OscGFP488 EdU647 2DG 40x 0.6 zoom e	59179.3	9	1.5208
HC959_21	48hpa OscGFP488 EdU647 2DG 40x 0.6 zoom a	65931.6	13	1.97174
	48hpa OscGFP488 EdU647 2DG 40x 0.6 zoom b	62290.6	10	1.60538
	48hpa OscGFP488 EdU647 2DG 40x 0.6 zoom c	59573.1	11	1.84647
	48hpa OscGFP488 EdU647 2DG 40x 0.6 zoom d	59367.7	14	2.35819
HC960_21	48hpa OscGFP488 EdU647 2DG 40x 0.6 zoom a	53244.7	14	2.62937
	48hpa OscGFP488 EdU647 2DG 40x 0.6 zoom b	56142.7	24	4.27482
	48hpa OscGFP488 EdU647 2DG 40x 0.6 zoom c	57118.8	25	4.37684
	48hpa OscGFP488 EdU647 2DG 40x 0.6 zoom d	54144.9	12	2.21628
	48hpa OscGFP488 EdU647 2DG 40x 0.6 zoom e	56818.6	11	1.93599
