# Supplementary material for: A regeneration-triggered metabolic adaptation is necessary for cell identity transitions and cell cycle re-entry to support blastema formation and bone regeneration
Source: eLife. 2022 Aug 22;11:e76987. doi: 10.7554/eLife.76987 (PMC9395193; doi:10.7554/eLife.76987)
Supplement: Figure 6—figure supplement 4—source data 1. [file elife-76987-fig6-figsupp4-data1.xlsx]

## Sheet: Fig6 Fig Sup4 L-N
Control PBS 1x (uninjured condition)
						Sup Fig 9 L PBS column		Sup Fig 9 N PBS column
Fish number	Bony-ray number (L->R)	Total fin area (A)	Fin width (W)	Bony-ray length (L)	Bony-ray width (W)	Area to width (A/W) caudal fin ratio	Lenght to width ratio ((L/W) per bony-ray	Average lenght to width ratio per fish
P1	1	59.124	6.147	8.581	0.24	9.61835	35.7542	47.1274
	2			9.08	0.261		34.7893
	3			9.592	0.167		57.4371
	4			8.513	0.177		48.096
	5			7.58	0.125		60.64
	6			6.204	0.094		66
	7			5.641	0.135		41.7852
	8			5.373	0.152		35.3487
	9			5.638	0.177		31.8531
	10			5.925	0.146		40.5822
	11			6.632	0.125		53.056
	12			7.306	0.188		38.8617
	13			8.175	0.127		64.3701
	14			8.893	0.168		52.9345
	15			8.909	0.192		46.401
	16			8.382	0.162		51.7407
	17			8.054	0.194		41.5155
P2	1	76.104	6.516	9.363	0.264	11.6796	35.4659	55.6988
	2			9.479	0.202		46.9257
	3			9.91	0.198		50.0505
	4			10.085	0.215		46.907
	5			8.927	0.125		71.416
	6			8.344	0.158		52.8101
	7			7.429	0.094		79.0319
	8			6.917	0.167		41.4192
	9			6.169	0.094		65.6277
	10			6.589	0.132		49.9167
	11			6.824	0.136		50.1765
	12			7.834	0.156		50.2179
	13			8.679	0.151		57.4768
	14			10.4	0.156		66.6667
	15			10.959	0.175		62.6229
	16			11.119	0.177		62.8192
	17			11.179	0.195		57.3282
P3	1	63.02	5.657	7.621	0.2	11.1402	38.105	54.1599
	2			8.025	0.2		40.125
	3			8.817	0.23		38.3348
	4			9.129	0.177		51.5763
	5			7.919	0.104		76.1442
	6			7.396	0.167		44.2874
	7			7.039	0.172		40.9244
	8			6.459	0.125		51.672
	9			6.178	0.125		49.424
	10			6.199	0.083		74.6867
	11			6.274	0.135		46.4741
	12			6.815	0.094		72.5
	13			7.279	0.19		38.3105
	14			8.063	0.094		85.7766
	15			9.012	0.156		57.7692
	16			9.465	0.139		68.0935
	17			9.046	0.2		45.23
	18			8.982	0.162		55.4444
P4	1	55.503	5.086	8.293	0.24	10.9129	34.5542	68.3227
	2			8.766	0.136		64.4559
	3			8.958	0.146		61.3562
	4			8.154	0.135		60.4
	5			7.042	0.125		56.336
	6			6.333	0.125		50.664
	7			5.615	0.042		133.69
	8			5.784	0.115		50.2957
	9			5.94	0.104		57.1154
	10			6.571	0.104		63.1827
	11			7.388	0.106		69.6981
	12			8.768	0.094		93.2766
	13			9.443	0.094		100.457
	14			9.58	0.125		76.64
	15			8.804	0.167		52.7186
P5	1	75.637	6.553	8.611	0.244	11.5423	35.291	58.8823
	2			9.05	0.208		43.5096
	3			10.092	0.185		54.5514
	4			10.188	0.172		59.2326
	5			8.96	0.137		65.4015
	6			8.16	0.096		85
	7			7.489	0.149		50.2617
	8			7.464	0.125		59.712
	9			6.896	0.127		54.2992
	10			6.345	0.086		73.7791
	11			7.146	0.149		47.9597
	12			7.159	0.127		56.3701
	13			7.816	0.104		75.1538
	14			8.972	0.139		64.5468
	15			10.134	0.146		69.411
	16			10.416	0.167		62.3713
	17			9.938	0.192		51.7604
	18			9.844	0.192		51.2708
2DG (uninjured condition)
						Sup Fig 9 L 2DG column		Sup Fig 9 N 2DG column
Fish number	Bony-ray number (L->R)	Total fin area (A)	Fin width (W)	Bony-ray length (L)	Bony-ray width (W)	Area to width (A/W) caudal fin ratio	Lenght to width ratio ((L/W) per bony-ray	Average lenght to width ratio per fish
P1	1	65.891	6.5	7.75	0.22	10.1371	35.2273	58.215
	2			8.808	0.168		52.4286
	3			9.448	0.192		49.2083
	4			8.692	0.142		61.2113
	5			7.569	0.149		50.7987
	6			6.992	0.112		62.4286
	7			6.719	0.157		42.7962
	8			6.012	0.083		72.4337
	9			5.948	0.094		63.2766
	10			5.75	0.083		69.2771
	11			5.968	0.115		51.8957
	12			6.633	0.137		48.4161
	13			6.949	0.129		53.8682
	14			7.962	0.146		54.5342
	15			9.195	0.125		73.56
	16			9.042	0.083		108.94
	17			9.261	0.191		48.4869
	18			8.246	0.168		49.0833
P2	1	65.048	6.136	7.937	0.223	10.601	35.5919	62.7455
	2			8.973	0.172		52.1686
	3			9.154	0.142		64.4648
	4			8.751	0.139		62.9568
	5			8.525	0.125		68.2
	6			7.417	0.094		78.9043
	7			6.974	0.094		74.1915
	8			6.334	0.094		67.383
	9			5.928	0.083		71.4217
	10			5.973	0.122		48.959
	11			6.257	0.094		66.5638
	12			6.677	0.125		53.416
	13			7.626	0.109		69.9633
	14			8.115	0.104		78.0288
	15			9.325	0.152		61.3487
	16			9.516	0.146		65.1781
	17			9.753	0.192		50.7969
	18			9.102	0.152		59.8816
P3	1	57.164	6.275	7.852	0.225	9.1098	34.8978	59.2648
	2			8.536	0.158		54.0253
	3			8.825	0.156		56.5705
	4			8.728	0.137		63.708
	5			7.959	0.139		57.259
	6			7.24	0.125		57.92
	7			6.486	0.104		62.3654
	8			5.898	0.094		62.7447
	9			5.876	0.125		47.008
	10			6.126	0.052		117.808
	11			6.73	0.115		58.5217
	12			7.105	0.125		56.84
	13			7.719	0.125		61.752
	14			8.616	0.115		74.9217
	15			8.857	0.157		56.414
	16			9.199	0.217		42.3917
	17			8.386	0.198		42.3535
P4	1	59.442	6.045	8.188	0.212	9.83325	38.6226	55.9929
	2			8.474	0.139		60.964
	3			8.6	0.199		43.2161
	4			8.282	0.139		59.5827
	5			7.783	0.115		67.6783
	6			6.971	0.115		60.6174
	7			6.546	0.146		44.8356
	8			5.879	0.083		70.8313
	9			5.715	0.084		68.0357
	10			5.987	0.103		58.1262
	11			6.321	0.109		57.9908
	12			6.654	0.094		70.7872
	13			7.183	0.125		57.464
	14			8.259	0.146		56.5685
	15			8.779	0.188		46.6968
	16			9.012	0.177		50.9153
	17			8.685	0.223		38.9462
P5	1	64.821	6.534	8.618	0.252	9.92057	34.1984	50.9622
	2			8.819	0.199		44.3166
	3			9.289	0.189		49.1481
	4			8.664	0.158		54.8354
	5			8.182	0.139		58.8633
	6			7.406	0.156		47.4744
	7			6.949	0.086		80.8023
	8			5.927	0.125		47.416
	9			5.969	0.129		46.2713
	10			5.637	0.115		49.0174
	11			6.399	0.115		55.6435
	12			6.543	0.137		47.7591
	13			7.271	0.146		49.8014
	14			8.071	0.156		51.7372
	15			8.829	0.146		60.4726
	16			9.626	0.167		57.6407
	17			9.194	0.221		41.6018
	18			8.83	0.219		40.3196
P6	1	55.729	5.678	7.873	0.205	9.8149	38.4049	60.1375
	2			8.419	0.125		67.352
	3			8.459	0.146		57.9384
	4			8.472	0.115		73.6696
	5			7.893	0.112		70.4732
	6			7.156	0.125		57.248
	7			6.677	0.105		63.5905
	8			6.333	0.083		76.3012
	9			6.24	0.138		45.2174
	10			6.21	0.115		54
	11			6.939	0.146		47.5274
	12			7.435	0.115		64.6522
	13			8.535	0.105		81.2857
	14			8.796	0.135		65.1556
	15			9.456	0.147		64.3265
	16			9.151	0.162		56.4877
	17			8.322	0.215		38.707
