# Supplementary material for: A regeneration-triggered metabolic adaptation is necessary for cell identity transitions and cell cycle re-entry to support blastema formation and bone regeneration
Source: eLife. 2022 Aug 22;11:e76987. doi: 10.7554/eLife.76987 (PMC9395193; doi:10.7554/eLife.76987)
Supplement: Figure 6—source data 1. [file elife-76987-fig6-data1.xlsx]

## Sheet: Figure 6
Control (PBS1x condition)
						Fig 6F PBS1x 0-36hpa column	Fig 6E PBS1x 0-36hpa column	Fig 6G PBS1x 0-36hpa column					Fig 6J PBS1x 0-36hpa columns			Fig 6K PBS+P3:Q441x 0-36hpa columns
Number of fish	Fin Cryosection Internal reference (File name)
		total area blastema	total number of OB (runx+osx+ and runx2+osx-)	number of runx2+osx+	number of runx2+osx-	runx2+osx+ per 100um2	runx2+osx- 100um2	runx2+osx+ %	runx2+osx- %		number of runx2+osx+ EdU +	number of runx2+osx- EdU +	total number of runx2+osx+ EdU + per 100um2	total number of runx2+osx- EdU + per 100um2		% of runx+Osx+edu+ in total runx2+osx+ population	% of Runx2+Osx-edu+ in total runx2+osx+ population
HC#169_20	48hpa OxsCherry568 Runx2Cy5 EdU488 PBS1x 40x 0.6 zoom c	47443.1	172	145	27	30.5629	5.69103	84.3023	15.6977		28	1	5.90181	0.210779		19.3103	3.7037
	48hpa OxsCherry568 Runx2Cy5 EdU488 PBS1x 40x 0.6 zoom d	46555.1	144	127	17	27.2795	3.65159	88.1944	11.8056		28	3	6.01438	0.644398		22.0472	17.6471
	48hpa OxsCherry568 Runx2Cy5 EdU488 PBS1x 40x 0.6 zoom e	46704.8	119	103	16	22.0534	3.42577	86.5546	13.4454		29	1	6.20921	0.214111		28.1553	6.25
	48hpa OxsCherry568 Runx2Cy5 EdU488 PBS1x 40x 0.6 zoom a	48057.4	126	107	19	22.265	3.95361	84.9206	15.0794		22	2	4.57786	0.416169		20.5607	10.5263
	48hpa OxsCherry568 Runx2Cy5 EdU488 PBS1x 40x 0.6 zoom b	49364.9	141	116	25	23.4985	5.06433	82.2695	17.7305		14	6	2.83602	1.21544		12.069	24
HC#847_19	48hpa OxsCherry568 Runx2Cy5 EdU488 PBS1x 40x 0.6 zoom d	37939.6	91	74	17	19.5047	4.48081	81.3187	18.6813		9	1	2.37219	0.263577		12.1622	5.88235
	48hpa OxsCherry568 Runx2Cy5 EdU488 PBS1x 40x 0.6 zoom e	36279.3	103	81	22	22.3268	6.06406	78.6408	21.3592		12	2	3.30767	0.551279		14.8148	9.09091
	48hpa OxsCherry568 Runx2Cy5 EdU488 PBS1x 40x 0.6 zoom a	42573.7	85	58	27	13.6234	6.34194	68.2353	31.7647		17	3	3.99308	0.70466		29.3103	11.1111
	48hpa OxsCherry568 Runx2Cy5 EdU488 PBS1x 40x 0.6 zoom b	47321.6	98	68	30	14.3698	6.3396	69.3878	30.6122		16	3	3.38112	0.63396		23.5294	10
	48hpa OxsCherry568 Runx2Cy5 EdU488 PBS1x 40x 0.6 zoom C	33687.5	90	69	21	20.4824	6.23377	76.6667	23.3333		18	7	5.34323	2.07792		26.087	33.3333
HC#848_19	48hpa OxsCherry568 Runx2Cy5 EdU488 PBS1x 40x 0.6 zoom d	35023	93	70	23	19.9869	6.56711	75.2688	24.7312		13	3	3.71185	0.85658		18.5714	13.0435
	48hpa OxsCherry568 Runx2Cy5 EdU488 PBS1x 40x 0.6 zoom a1	22479	52	35	17	15.5701	7.56262	67.3077	32.6923		8	3	3.55888	1.33458		22.8571	17.6471
	48hpa OxsCherry568 Runx2Cy5 EdU488 PBS1x 40x 0.6 zoom b	33306.1	91	73	18	21.9179	5.40442	80.2198	19.7802		15	1	4.50368	0.300245		20.5479	5.55556
	48hpa OxsCherry568 Runx2Cy5 EdU488 PBS1x 40x 0.6 zoom c	23296.1	68	43	25	18.458	10.7314	63.2353	36.7647		12	4	5.15108	1.71703		27.907	16
	48hpa OxsCherry568 Runx2Cy5 EdU488 PBS1x 40x 0.6 zoom e	43075.5	107	89	18	20.6614	4.17871	83.1776	16.8224		17	2	3.94656	0.464301		19.1011	11.1111
HC#849_19	48hpa OxsCherry568 Runx2Cy5 EdU488 PBS1x 40x 0.6 zoom a1	21758.1	89	57	32	26.1972	14.7072	64.0449	35.9551		19	6	8.7324	2.7576		33.3333	18.75
	48hpa OxsCherry568 Runx2Cy5 EdU488 PBS1x 40x 0.6 zoom b	36549.4	213	168	45	45.9652	12.3121	78.8732	21.1268		24	9	6.56646	2.46242		14.2857	20
	48hpa OxsCherry568 Runx2Cy5 EdU488 PBS1x 40x 0.6 zoom c1	22428.8	54	40	14	17.8342	6.24196	74.0741	25.9259		10	2	4.45854	0.891709		25	14.2857
	48hpa OxsCherry568 Runx2Cy5 EdU488 PBS1x 40x 0.6 zoom e	35794.8	90	54	36	15.086	10.0573	60	40		17	8	4.74929	2.23496		31.4815	22.2222
HC#850_18	48hpa OxsCherry568 Runx2Cy5 EdU488 PBS1x 40x 0.6 zoom a	35999.7	89	70	19	19.4446	5.27782	78.6517	21.3483		13	4	3.61114	1.11112		18.5714	21.0526
	48hpa OxsCherry568 Runx2Cy5 EdU488 PBS1x 40x 0.6 zoom b	37341.1	83	65	18	17.4071	4.82043	78.3133	21.6867		9	2	2.41021	0.535603		13.8462	11.1111
	48hpa OxsCherry568 Runx2Cy5 EdU488 PBS1x 40x 0.6 zoom c	35346.1	91	69	22	19.5212	6.22417	75.8242	24.1758		19	4	5.37542	1.13167		27.5362	18.1818
	48hpa OxsCherry568 Runx2Cy5 EdU488 PBS1x 40x 0.6 zoom d1	23457.4	57	43	14	18.3311	5.96828	75.4386	24.5614		11	2	4.68936	0.852611		25.5814	14.2857
HC#851_19	48hpa OxsCherry568 Runx2Cy5 EdU488 PBS1x 40x 0.6 zoom a	50362.1	116	91	25	18.0691	4.96405	78.4483	21.5517		22	4	4.36836	0.794248		24.1758	16
	48hpa OxsCherry568 Runx2Cy5 EdU488 PBS1x 40x 0.6 zoom b	51349	131	107	24	20.8378	4.6739	81.6794	18.3206		37	4	7.20559	0.778983		34.5794	16.6667
	48hpa OxsCherry568 Runx2Cy5 EdU488 PBS1x 40x 0.6 zoom c	57772.3	99	86	13	14.886	2.25021	86.8687	13.1313		25	2	4.32733	0.346187		29.0698	15.3846
	48hpa OxsCherry568 Runx2Cy5 EdU488 PBS1x 40x 0.6 zoom d	50978	149	126	23	24.7165	4.51175	84.5638	15.4362		27	2	5.2964	0.392326		21.4286	8.69565
	48hpa OxsCherry568 Runx2Cy5 EdU488 PBS1x 40x 0.6 zoom e	38076.9	98	80	18	21.0101	4.72728	81.6327	18.3673		18	2	4.72728	0.525253		22.5	11.1111
2DG condition
						Fig 6F 2DG 0-36hpa column	Fig 6E 2DG 0-36hpa column	Fig 6G 2DG 0-36hpa column					Fig 6J 2DG 0-36hpa columns			Fig 6K 2DG 0-36hpa columns
Number of fish	Fin Cryosection Internal reference (File name)
		total area blastema	total number of OB (runx+osx+ and runx2+osx-)	number of runx2+osx+	number of runx2+osx-	runx2+osx+ per 100um2	runx2+osx- 100um2	runx2+osx+ %	runx2+osx- %		number of runx2+osx+ EdU +	number of runx2+osx- EdU +	total number of runx2+osx+ EdU + per 100um2	total number of runx2+osx- EdU + per 100um2		% of runx+Osx+edu+ in total runx2+osx+ population	% of Runx2+Osx-edu+ in total runx2+osx+ population
HC#170_20	48hpa OxsCherry568 Runx2Cy5 EdU488 2DG 0.5mg 40x 0.6 zoom c1	11505.3	26	17	9	14.7758	7.82248	65.3846	34.6154		0	0	0	0		0	0
	48hpa OxsCherry568 Runx2Cy5 EdU488 2DG 0.5mg 40x 0.6 zoom d1	10825.7	32	20	12	18.4746	11.0848	62.5	37.5		0	0	0	0		0	0
	48hpa OxsCherry568 Runx2Cy5 EdU488 2DG 0.5mg 40x 0.6 zoom a1	8744.94	13	8	5	9.14815	5.71759	61.5385	38.4615		0	1	0	1.14352		0	20
	48hpa OxsCherry568 Runx2Cy5 EdU488 2DG 0.5mg 40x 0.6 zoom b1	10889	29	13	16	11.9387	14.6938	44.8276	55.1724		0	0	0	0		0	0
	48hpa OxsCherry568 Runx2Cy5 EdU488 2DG 0.5mg 40x 0.6 zoom e1	11744.1	25	11	14	9.36644	11.9209	44	56		0	1	0	0.851495		0	7.14286
HC#171_20	48hpa OxsCherry568 Runx2Cy5 EdU488 2DG 0.5mg 40x 0.6 zoom d1	9200.79	25	10	15	10.8686	16.3029	40	60		0	0	0	0		0	0
	48hpa OxsCherry568 Runx2Cy5 EdU488 2DG 0.5mg 40x 0.6 zoom a1	10251	15	8	7	7.80415	6.82863	53.3333	46.6667		0	1	0	0.975518		0	14.2857
	48hpa OxsCherry568 Runx2Cy5 EdU488 2DG 0.5mg 40x 0.6 zoom b1	9026.66	22	12	10	13.294	11.0783	54.5455	45.4545		0	0	0	0		0	0
	48hpa OxsCherry568 Runx2Cy5 EdU488 2DG 0.5mg 40x 0.6 zoom e1	11565.1	13	8	5	6.91734	4.32334	61.5385	38.4615		0	1	0	0.864668		0	20
	48hpa OxsCherry568 Runx2Cy5 EdU488 2DG 0.5mg 40x 0.6 zoom c1	12812.3	9	5	4	3.9025	3.122	55.5556	44.4444		1	0	0.7805	0		20	0
HC#172_20	48hpa OxsCherry568 Runx2Cy5 EdU488 2DG 0.5mg 40x 0.6 zoom e1	12881.3	29	21	8	16.3026	6.21053	72.4138	27.5862		0	0	0	0		0	0
	48hpa OxsCherry568 Runx2Cy5 EdU488 2DG 0.5mg 40x 0.6 zoom f1	12104	18	14	4	11.5664	3.30468	77.7778	22.2222		0	1	0	0.82617		0	25
	48hpa OxsCherry568 Runx2Cy5 EdU488 2DG 0.5mg 40x 0.6 zoom a1	11648.4	4	3	1	2.57545	0.858485	75	25		0	0	0	0		0	0
	48hpa OxsCherry568 Runx2Cy5 EdU488 2DG 0.5mg 40x 0.6 zoom b1	11364	17	11	6	9.67973	5.27985	64.7059	35.2941		0	1	0	0.879975		0	16.6667
	48hpa OxsCherry568 Runx2Cy5 EdU488 2DG 0.5mg 40x 0.6 zoom c1	12646.4	17	16	1	12.6518	0.790737	94.1176	5.88235		0	0	0	0		0	0
	48hpa OxsCherry568 Runx2Cy5 EdU488 2DG 0.5mg 40x 0.6 zoom d1	12077.6	15	11	4	9.10777	3.31192	73.3333	26.6667		0	0	0	0		0	0
HC#173_20	48hpa OxsCherry568 Runx2Cy5 EdU488 2DG 0.5mg 40x 0.6 zoom a1	11525	24	11	13	9.54443	11.2798	45.8333	54.1667		0	0	0	0		0	0
	48hpa OxsCherry568 Runx2Cy5 EdU488 2DG 0.5mg 40x 0.6 zoom b1	12675.1	20	11	10	8.6784	7.88946	55	50		0	0	0	0		0	0
	48hpa OxsCherry568 Runx2Cy5 EdU488 2DG 0.5mg 40x 0.6 zoom c1	11034.8	28	13	15	11.7809	13.5933	46.4286	53.5714		0	4	0	3.62488		0	26.6667
	48hpa OxsCherry568 Runx2Cy5 EdU488 2DG 0.5mg 40x 0.6 zoom d1	12859.1	35	19	16	14.7755	12.4426	54.2857	45.7143		0	1	0	0.77766		0	6.25
	48hpa OxsCherry568 Runx2Cy5 EdU488 2DG 0.5mg 40x 0.6 zoom e1	11664.3	15	10	5	8.57313	4.28657	66.6667	33.3333		0	4	0	3.42925		0	80
HC#174_20	48hpa OxsCherry568 Runx2Cy5 EdU488 2DG 0.5mg 40x 0.6 zoom f1	7136.24	8	3	5	4.2039	7.00649	37.5	62.5		0	0	0	0		0	0
	48hpa OxsCherry568 Runx2Cy5 EdU488 2DG 0.5mg 40x 0.6 zoom d1	5567.99	11	10	1	17.9598	1.79598	90.9091	9.09091		0	0	0	0		0	0
	48hpa OxsCherry568 Runx2Cy5 EdU488 2DG 0.5mg 40x 0.6 zoom a1	7130.97	5	3	2	4.207	2.80467	60	40		1	0	1.40233	0		33.3333	0
	48hpa OxsCherry568 Runx2Cy5 EdU488 2DG 0.5mg 40x 0.6 zoom b1	7617.46	7	6	1	7.87664	1.31277	85.7143	14.2857		0	0	0	0		0	0
	48hpa OxsCherry568 Runx2Cy5 EdU488 2DG 0.5mg 40x 0.6 zoom c1	7770.89	20	16	4	20.5897	5.14742	80	20		0	0	0	0		0	0
	48hpa OxsCherry568 Runx2Cy5 EdU488 2DG 0.5mg 40x 0.6 zoom e1	9839.63	7	4	3	4.06519	3.0489	57.1429	42.8571		0	0	0	0		0	0
