# Supplementary material for: A regeneration-triggered metabolic adaptation is necessary for cell identity transitions and cell cycle re-entry to support blastema formation and bone regeneration
Source: eLife. 2022 Aug 22;11:e76987. doi: 10.7554/eLife.76987 (PMC9395193; doi:10.7554/eLife.76987)
Supplement: Supplementary file 1. [file elife-76987-supp1.xlsx]

## Sheet: DEG List
Supplementary File 1: List of significantly differentially expressed genes with p-value lower than the 0.05 threshold and log2 fold change < -1 or > 1.
TargetName	Gr6H_6H1.300	Gr6H_6H2.300	Gr6H_6H3.300	GrU_U2.300	GrU_U3.300	mean signal (Gr6H)	mean signal (GrU)	log2FC	PValue	GeneSymbol	GO	Description	GenomicCoordinates
ENSDART00000126479	27672.5	30987.8	25477	2.89701	2.73388	28045.8	2.81544	13.2781	1.66816e-06	plekhn1		pleckstrin homology domain containing, family N member 1 [Source:ZFIN;Acc:ZDB-GENE-090313-357]	chr23:23526278-23546810
ENSDART00000153310	11057.8	13646	12514.2	2.76348	2.91468	12406	2.83908	12.0885	4.56005e-06	cad	GO:0008716 (D-alanine-D-alanine ligase activity)	carbamoyl-phosphate synthetase 2, aspartate transcarbamylase, and dihydroorotase [Source:ZFIN;Acc:ZDB-GENE-021030-4]	chr20:38813028-38852332
ENSDART00000016105	33030	28214.3	37724.6	13.1621	14.4128	32989.6	13.7875	11.2158	6.84e-06	vps35	GO:0005488 (binding)	vacuolar protein sorting 35 (yeast) [Source:ZFIN;Acc:ZDB-GENE-030131-2042]	chr7:44443549-44541982
ENSDART00000152224	29.619	29.7729	23.5809	9623.95	10743.3	27.6576	10183.6	-8.53047	9.01414e-06	zgc:63470		chromosome 11 open reading frame 68 [Source:HGNC Symbol;Acc:HGNC:28801]	chr7:719060-725509
ENSDART00000088928	15123	13806.6	13629.9	1540.74	1461.3	14186.5	1501.02	3.23945	1.69811e-05	fam168b	GO:0003674 (molecular_function)	family with sequence similarity 168, member B [Source:ZFIN;Acc:ZDB-GENE-060929-180]	chr24:31197613-31210606
ENSDART00000151391	15.7205	16.9201	19.1839	1387.1	1321.64	17.2748	1354.37	-6.2973	2.58136e-05			cdna:known_by_projection chromosome:Zv9:19:8539326:8541550:1 gene:ENSDARG00000058672 gene_biotype:protein_coding transcript_biotype:retained_intron	chr19:8539326-8541550
ENSDART00000131791	12142	15721.4	14632	28.0817	24.1462	14165.1	26.1139	9.07903	2.8772e-05			cdna:known chromosome:Zv9:23:38244640:38252969:-1 gene:ENSDARG00000061228 gene_biotype:protein_coding transcript_biotype:processed_transcript	chr23:38244640-38252969
ENSDART00000114823	45.2284	52.909	55.6129	4137.94	3683.11	51.2501	3910.53	-6.25672	3.28246e-05		GO:0004888 (transmembrane signaling receptor activity)	Uncharacterized protein [Source:UniProtKB/TrEMBL;Acc:E7F2T1]	chr3:53041645-53042115
ENSDART00000061365	11815.4	13051.3	11762.3	7.42612	6.78324	12209.7	7.10468	10.7468	3.6785e-05	cad	GO:0008716 (D-alanine-D-alanine ligase activity)	carbamoyl-phosphate synthetase 2, aspartate transcarbamylase, and dihydroorotase [Source:ZFIN;Acc:ZDB-GENE-021030-4]	chr20:38813028-38852332
ENSDART00000102381	9236.01	10017.3	6755.42	34.3314	29.0466	8669.58	31.689	8.08082	3.92886e-05	ube2d3	GO:0016881 (acid-amino acid ligase activity)	ubiquitin-conjugating enzyme E2D 3 [Source:ZFIN;Acc:ZDB-GENE-030131-551]	chr13:11461907-11478686
ENSDART00000130393	19.9904	14.4615	12.3455	22688.6	18072.8	15.5991	20380.7	-10.3718	4.02809e-05	tlr7	GO:0005515 (protein binding)	toll-like receptor 7 [Source:ZFIN;Acc:ZDB-GENE-040219-11]	chr9:56163682-56166837
ENSDART00000140463	32.4792	21.2187	27.9692	7404.29	8822.16	27.2224	8113.22	-8.2357	4.18594e-05	esyt1a	GO:0005515 (protein binding)	extended synaptotagmin-like protein 1a [Source:ZFIN;Acc:ZDB-GENE-090311-55]	chr23:25595357-25636355
ENSDART00000112774	12013	11173.3	12044.1	239.817	225.096	11743.5	232.456	5.65862	5.2951e-05	mrps30	GO:0003735 (structural constituent of ribosome)	mitochondrial ribosomal protein S30 [Source:ZFIN;Acc:ZDB-GENE-050809-4]	chr5:63851256-63883852
ENSDART00000055618	52.4826	60.1025	39.6901	9091.15	10460.6	50.7584	9775.89	-7.60686	5.43648e-05	iba57	GO:0004047 (aminomethyltransferase activity)	IBA57, iron-sulfur cluster assembly homolog (S. cerevisiae) [Source:ZFIN;Acc:ZDB-GENE-060929-712]	chr2:3910978-3914185
ENSDART00000029366	4766.17	5500.76	3180.7	3.19929	2.70301	4482.54	2.95115	10.5369	6.11042e-05	zgc:66447		zgc:66447 [Source:ZFIN;Acc:ZDB-GENE-030131-4748]	chr14:12279277-12309867
ENSDART00000127741	16966.6	8823.64	12518.1	6.84853	5.18161	12769.4	6.01507	11.0152	6.47625e-05	slc1a4	GO:0017153 (sodium:dicarboxylate symporter activity)	solute carrier family 1 (glutamate/neutral amino acid transporter), member 4 [Source:ZFIN;Acc:ZDB-GENE-030616-566]	chr13:24655104-24671375
ENSDART00000143412	10263.7	6130.07	7863.09	11.7215	14.8849	8085.6	13.3032	9.22584	6.57926e-05	sap130b		Sin3A-associated protein b [Source:ZFIN;Acc:ZDB-GENE-070912-570]	chr2:22389999-22423741
ENSDART00000132192	31.5834	39.8501	37.8635	13616	11652.7	36.4323	12634.4	-8.44059	6.6258e-05	si:ch211-195b15.8		si:ch211-195b15.8 [Source:ZFIN;Acc:ZDB-GENE-131127-627]	chr3:32540734-32544168
ENSDART00000112217	18.5644	17.8801	19.2066	6.26718	6.37577	18.5503	6.32148	1.55255	6.68824e-05	pask	GO:0004674 (protein serine/threonine kinase activity)	PAS domain containing serine/threonine kinase [Source:ZFIN;Acc:ZDB-GENE-030131-1394]	chr2:44573825-44607370
ENSDART00000124833	5655.66	8727.98	9100.26	3.42258	3.03092	7827.96	3.22675	11.2154	7.72302e-05	pdcd11	GO:0005515 (protein binding)	programmed cell death 11 [Source:ZFIN;Acc:ZDB-GENE-030131-4076]	chr1:49941416-49987572
ENSDART00000138231	7189.52	11595.9	7704.09	5.39161	7.16996	8829.83	6.28078	10.4385	0.000101123			havana:processed_transcript chromosome:Zv9:2:9535334:9536958:-1 gene:ENSDARG00000092780 gene_biotype:processed_transcript transcript_biotype:lincRNA	chr2:9535334-9536958
ENSDART00000022135	7124.03	12473.1	10408.2	42.0941	51.3262	10001.8	46.7102	7.71156	0.000119002	rhot1a	GO:0016787 (hydrolase activity)	ras homolog gene family, member T1a [Source:ZFIN;Acc:ZDB-GENE-030131-5354]	chr3:26698091-26746126
ENSDART00000077188	3005.32	1774.38	2710.99	10.5985	12.6254	2496.89	11.612	7.71831	0.000126553	cox7a3	GO:0009055 (electron carrier activity)	cytochrome c oxidase subunit VIIa polypeptide 3 [Source:ZFIN;Acc:ZDB-GENE-030131-7691]	chr12:26725035-26729228
ENSDART00000113792	32.3344	31.691	42.0318	631.917	552.096	35.3524	592.006	-4.07471	0.000143611	si:ch73-387e10.3		si:ch73-387e10.3 [Source:ZFIN;Acc:ZDB-GENE-091204-292]	chr20:54672484-54685150
ENSDART00000097561	23.1411	43.5062	39.8865	25303	20763.7	35.5112	23033.4	-9.38661	0.000149503		GO:0005509 (calcium ion binding)	Kv channel interacting protein 2 [Source:HGNC Symbol;Acc:HGNC:15522]	chr13:537713-542472
ENSDART00000139342	45669.6	34822.3	26290.1	17.2789	23.8355	35594	20.5572	10.74	0.00015466	zgc:91910		zgc:91910 [Source:ZFIN;Acc:ZDB-GENE-040808-48]	chr19:36561489-36565407
ENSDART00000062908	6455.98	11548.6	6179.41	17.7776	23.5471	8061.33	20.6623	8.5603	0.000155813	rpl7l1	GO:0030529 (ribonucleoprotein complex)	ribosomal protein L7-like 1 [Source:ZFIN;Acc:ZDB-GENE-030131-970]	chr20:36699691-36703841
ENSDART00000064542	46719.5	62506.4	39382.2	235.999	182.635	49536	209.317	7.87184	0.000161457	rpf2	GO:0003674 (molecular_function)	ribosome production factor 2 homolog (S. cerevisiae) [Source:ZFIN;Acc:ZDB-GENE-040426-2501]	chr20:171660-175759
ENSDART00000108950	3195.24	3868.1	6123.97	5.9499	5.00411	4395.77	5.47701	9.59847	0.000165716	ttll4	GO:0018095 (protein polyglutamylation)	tubulin tyrosine ligase-like family, member 4 [Source:ZFIN;Acc:ZDB-GENE-070912-313]	chr9:14388707-14419602
ENSDART00000143364	3045	2269.54	2407.9	3.69007	3.71974	2574.15	3.70491	9.42857	0.000183546	sdf2l1	GO:0003674 (molecular_function)	stromal cell-derived factor 2-like 1 [Source:ZFIN;Acc:ZDB-GENE-040808-46]	chr5:14510877-14518072
ENSDART00000078156	7881.09	14950.4	16414.9	25.4884	18.4589	13082.1	21.9737	9.16592	0.000190442	srm	GO:0016740 (transferase activity)	spermidine synthase [Source:ZFIN;Acc:ZDB-GENE-040426-1183]	chr23:28961755-28969998
ENSDART00000147544	2917.71	2136.74	3735.22	32.3929	25.2649	2929.89	28.8289	6.64126	0.000198598			cdna:known chromosome:Zv9:16:34983181:34984873:-1 gene:ENSDARG00000069855 gene_biotype:protein_coding transcript_biotype:retained_intron	chr16:34983181-34984873
ENSDART00000081980	9995.68	18430.8	18654.3	10.3809	12.2449	15693.6	11.3129	10.3864	0.000202822	cers2b	GO:0043565 (sequence-specific DNA binding)	ceramide synthase 2b [Source:ZFIN;Acc:ZDB-GENE-110408-40]	chr16:1389245-1425912
ENSDART00000023101	10298.5	13030.8	14333.5	3.46845	2.69135	12554.3	3.0799	11.991	0.000213933	pes	GO:0043021 (ribonucleoprotein complex binding)	pescadillo [Source:ZFIN;Acc:ZDB-GENE-990415-206]	chr5:14039259-14067732
ENSDART00000010496	418.235	409.094	382.515	1143.57	1122.6	403.281	1133.09	-1.49137	0.000215542	fhl5	GO:0046872 (metal ion binding)	four and a half LIM domains 5 [Source:ZFIN;Acc:ZDB-GENE-040822-3]	chr17:15446811-15452983
ENSDART00000056735	3.70188	3.65127	5.21071	3413.59	4471.39	4.18796	3942.49	-9.88574	0.000220641	rgs20	GO:0005096 (GTPase activator activity)	regulator of G-protein signaling 20 [Source:ZFIN;Acc:ZDB-GENE-040718-128]	chr2:30467360-30499334
ENSDART00000023549	15088.5	14488.1	18907.1	2.78718	3.49717	16161.2	3.14217	12.3276	0.000221861	phb2b	GO:0003674 (molecular_function)	prohibitin 2b [Source:ZFIN;Acc:ZDB-GENE-040718-430]	chr6:29420925-29428078
ENSDART00000029771	29594	28283.9	18615.8	48.2882	44.4399	25497.9	46.3641	9.07462	0.000239731	ahsa1l	GO:0001671 (ATPase activator activity)	AHA1, activator of heat shock protein ATPase homolog 1, like [Source:ZFIN;Acc:ZDB-GENE-030131-664]	chr17:43896310-43910257
ENSDART00000034401	2.96463	3.015	2.73767	14919.2	13413.2	2.90577	14166.2	-12.2505	0.000242966	cry1a	GO:0003913 (DNA photolyase activity)	cryptochrome 1a [Source:ZFIN;Acc:ZDB-GENE-010426-2]	chr4:11077567-11091060
ENSDART00000137464	150.262	131.562	137.047	11.9464	12.0041	139.624	11.9752	3.54118	0.000244171	srsf2a	GO:0003676 (nucleic acid binding)	serine/arginine-rich splicing factor 2a [Source:ZFIN;Acc:ZDB-GENE-040426-2706]	chr12:33407774-33413849
ENSDART00000061617	3.57417	3.06866	7.93147	8713.7	5900.57	4.8581	7307.14	-10.6603	0.000244376	hmg20b		high-mobility group 20B [Source:ZFIN;Acc:ZDB-GENE-030131-4258]	chr22:20487688-20496746
ENSDART00000131731	10.8132	6.66213	5.13825	2269.54	1653.78	7.53785	1961.66	-8.07587	0.000244777	mef2ca		myocyte enhancer factor 2ca [Source:ZFIN;Acc:ZDB-GENE-980526-253]	chr10:45064986-45175629
ENSDART00000122359	16.0291	10.2219	16.2357	13913.6	10039.3	14.1622	11976.4	-9.73635	0.000259514	wu:fk66f10		wu:fk66f10 [Source:ZFIN;Acc:ZDB-GENE-030131-7035]	chr8:33330787-33345623
ENSDART00000008287	49357.1	49514.1	28814	54.3446	61.0981	42561.7	57.7213	9.48511	0.000271712	pgam1a	GO:0004619 (phosphoglycerate mutase activity)	phosphoglycerate mutase 1a [Source:ZFIN;Acc:ZDB-GENE-030131-1827]	chr13:31616794-31621589
ENSDART00000003548	78.8511	105.517	61.1406	3761.07	4798.09	81.8363	4279.58	-5.73377	0.000287984	znf385a	GO:0046872 (metal ion binding)	zinc finger protein 385A [Source:ZFIN;Acc:ZDB-GENE-090313-255]	chr23:28423302-28537655
ENSDART00000105823	3.67527	10.5336	5.79868	12360	7930.75	6.66917	10145.4	-10.6698	0.000290855	insrb	GO:0005515 (protein binding)	insulin receptor b [Source:ZFIN;Acc:ZDB-GENE-020503-4]	chr22:11037520-11164394
ENSDART00000156490	457.13	546.545	291.024	2.77025	3.75632	431.566	3.26329	7.01555	0.000300303	si:ch211-280h11.2		PET100 homolog (S. cerevisiae) [Source:HGNC Symbol;Acc:HGNC:40038]	chr3:53866706-53869366
ENSDART00000122683	8766.83	16782.3	13339.9	183.308	143.398	12963	163.353	6.27098	0.000321443	srp14	GO:0030942 (endoplasmic reticulum signal peptide binding)	signal recognition particle 14 [Source:ZFIN;Acc:ZDB-GENE-050913-131]	chr17:1330429-1351974
ENSDART00000105545	7932.82	8137.68	3604.48	2.81802	4.56759	6558.33	3.69281	10.7435	0.000357426	arl3	GO:0019003 (GDP binding)	ADP-ribosylation factor-like 3 [Source:ZFIN;Acc:ZDB-GENE-030131-7518]	chr12:35462650-35469034
ENSDART00000142250	8186.09	12864.7	11022.9	11.4666	11.2924	10691.2	11.3795	9.85111	0.000362298			cdna:known chromosome:Zv9:6:33610832:33614359:-1 gene:ENSDARG00000039208 gene_biotype:protein_coding transcript_biotype:processed_transcript	chr6:33610832-33614359
ENSDART00000134285	12985.7	25972.3	22870	2.72865	2.97569	20609.3	2.85217	12.7595	0.000370212	elmod2	GO:0005856 (cytoskeleton)	ELMO/CED-12 domain containing 2 [Source:ZFIN;Acc:ZDB-GENE-060824-2]	chr1:53887036-53945782
ENSDART00000144766	9551.59	16293.5	10541.9	36.97	26.2313	12129	31.6007	8.56504	0.000373637	nars	GO:0004816 (asparagine-tRNA ligase activity)	asparaginyl-tRNA synthetase [Source:ZFIN;Acc:ZDB-GENE-030131-1016]	chr21:1071552-1092435
ENSDART00000144594	66.0837	64.4067	57.824	24.9366	23.3867	62.7714	24.1617	1.37575	0.000375672	snrka	GO:0004713 (protein tyrosine kinase activity)	SNF related kinase a [Source:ZFIN;Acc:ZDB-GENE-040718-84]	chr16:9349173-9433131
ENSDART00000150384	36603.3	20314.7	15951.3	17.0613	26.9447	24289.8	22.003	10.0548	0.000383578	hmga2	GO:0003677 (DNA binding)	high mobility group AT-hook 2 [Source:ZFIN;Acc:ZDB-GENE-030131-3148]	chr4:11883794-11926611
ENSDART00000088690	23298.1	23626.6	8909.96	20.177	13.3097	18611.6	16.7434	10.0179	0.000384866	lman2	GO:0016020 (membrane)	lectin, mannose-binding 2 [Source:ZFIN;Acc:ZDB-GENE-070209-149]	chr14:27422515-27434514
ENSDART00000110870	10.6572	8.6722	8.56592	44.6364	40.4788	9.29843	42.5576	-2.20003	0.000393329	dicp3.1	GO:0005515 (protein binding)	diverse immunoglobulin domain-containing protein 3.1 [Source:ZFIN;Acc:ZDB-GENE-120306-18]	chr16:24066596-24077743
ENSDART00000135989	19580.3	22551.9	7811.57	6.77881	3.91019	16647.9	5.3445	11.519	0.00039732	cep170a	GO:0005515 (protein binding)	centrosomal protein 170a [Source:ZFIN;Acc:ZDB-GENE-090312-109]	chr13:10546975-10638162
ENSDART00000113092	15633	6808.33	12896.8	19.6816	24.6675	11779.4	22.1746	8.97838	0.000397363	abhd10b	GO:0003674 (molecular_function)	abhydrolase domain containing 10b [Source:ZFIN;Acc:ZDB-GENE-041111-196]	chr24:22535142-22542131
ENSDART00000077734	345.816	399.09	360.61	82.7728	90.3666	368.505	86.5697	2.08851	0.000405037	zgc:66160		chromosome 16 open reading frame 72 [Source:HGNC Symbol;Acc:HGNC:30103]	chr3:27746156-27752931
ENSDART00000098308	5295.72	8573.6	6675.26	45.0994	48.4108	6848.19	46.7551	7.16749	0.000409877	tmed1b	GO:0003674 (molecular_function)	transmembrane emp24 protein transport domain containing 1b [Source:ZFIN;Acc:ZDB-GENE-070112-1112]	chr1:59667310-59677129
ENSDART00000073595	4505.98	9031.97	8068.83	60.221	48.4221	7202.26	54.3216	6.9973	0.000421371		GO:0015171 (amino acid transmembrane transporter activity)	solute carrier family 7 (amino acid transporter light chain, L system), member 5 [Source:HGNC Symbol;Acc:HGNC:11063]	chr25:13162730-13206813
ENSDART00000156707	4.35553	2.67493	5.79105	3628.11	4198.96	4.27384	3913.53	-9.90502	0.000423211			cdna:known chromosome:Zv9:3:21147254:21153282:-1 gene:ENSDARG00000026875 gene_biotype:protein_coding transcript_biotype:retained_intron	chr3:21147254-21153282
ENSDART00000141011	82.1927	69.4024	155.46	20251.7	14253.9	102.352	17252.8	-7.46633	0.00043263			cdna:known chromosome:Zv9:5:24754140:24755648:1 gene:ENSDARG00000062326 gene_biotype:protein_coding transcript_biotype:processed_transcript	chr5:24754140-24755648
ENSDART00000115117	3828.07	11998.4	8726.27	5.483	8.3906	8184.23	6.9368	10.0862	0.000443209	brd4	GO:0070577 (lysine-acetylated histone binding)	bromodomain containing 4 [Source:ZFIN;Acc:ZDB-GENE-030131-267]	chr3:53754194-53869362
ENSDART00000038330	63022.4	58647.5	48080.7	8898.09	10111.8	56583.5	9504.95	2.56733	0.000453813	khsrp	GO:0003723 (RNA binding)	KH-type splicing regulatory protein [Source:ZFIN;Acc:ZDB-GENE-030131-4357]	chr1:55499599-55511646
ENSDART00000129421	15.813	14.1906	21.2643	293.738	363.193	17.0893	328.465	-4.27807	0.000456973	mrps22	GO:0008150 (biological_process)	mitochondrial ribosomal protein S22 [Source:ZFIN;Acc:ZDB-GENE-070615-31]	chr15:6812885-6830476
ENSDART00000078436	7.80504	17.2153	16.5828	14907.4	12358.8	13.8677	13633.1	-10.0213	0.000468516		GO:0005515 (protein binding)	Uncharacterized protein [Source:UniProtKB/TrEMBL;Acc:H9GXH7]	chrZv9_NA921:11160-67168
ENSDART00000043753	206.796	359.236	209.966	34077.3	29805.2	258.666	31941.3	-6.99495	0.000468728	macrod2		MACRO domain containing 2 [Source:ZFIN;Acc:ZDB-GENE-040426-1490]	chr13:34542671-34788678
ENSDART00000137853	9610.62	4196.74	7287.27	45.6932	35.2047	7031.55	40.449	7.37308	0.000473623			cdna:putative chromosome:Zv9:10:5023679:5027687:-1 gene:ENSDARG00000003429 gene_biotype:protein_coding transcript_biotype:processed_transcript	chr10:5023679-5027687
ENSDART00000055266	1179.23	2561.79	1498.56	11.9108	16.7372	1746.53	14.324	6.87238	0.00047455	rbbp6	GO:0008270 (zinc ion binding)	retinoblastoma binding protein 6 [Source:ZFIN;Acc:ZDB-GENE-040930-5]	chr3:35491691-35506490
ENSDART00000011882	67440.8	22833.3	49357.1	39.1655	54.7714	46543.7	46.9684	9.83695	0.000478182	nap1l1	GO:0005634 (nucleus)	nucleosome assembly protein 1, like 1 [Source:ZFIN;Acc:ZDB-GENE-030516-2]	chr4:2216012-2241310
ENSDART00000032344	7691.26	2289.04	5304.43	4.57962	2.8749	5094.91	3.72726	10.2881	0.000485362	nup35	GO:0031965 (nuclear membrane)	nucleoporin 35 [Source:ZFIN;Acc:ZDB-GENE-030131-9407]	chr9:12535701-12546212
ENSDART00000014049	15161.8	19697.8	7403.4	35.0179	50.5019	14087.7	42.7599	8.27515	0.000507637	wdr36	GO:0005515 (protein binding)	WD repeat domain 36 [Source:ZFIN;Acc:ZDB-GENE-030131-464]	chr5:57275953-57323452
ENSDART00000132454	37.4502	20.1515	24.5755	7456.57	10924	27.3924	9190.27	-8.41346	0.000513969	si:dkeyp-85e10.1	GO:0005525 (GTP binding)	nuclear GTPase, germinal center associated [Source:HGNC Symbol;Acc:HGNC:33550]	chr19:8461180-8483816
ENSDART00000075400	30542	20997	12848.8	19.9426	16.9427	21462.6	18.4426	10.1017	0.000516918	eif3jb	GO:0003743 (translation initiation factor activity)	eukaryotic translation initiation factor 3, subunit Jb [Source:ZFIN;Acc:ZDB-GENE-040426-2900]	chr7:32760495-32766613
ENSDART00000153463	6.51194	5.16461	5.18234	46.5178	54.1989	5.61963	50.3584	-3.16817	0.000527297			havana:antisense chromosome:Zv9:12:3156287:3184787:1 gene:ENSDARG00000096784 gene_biotype:antisense transcript_biotype:antisense	chr12:3156287-3184787
ENSDART00000111938	13843.9	29011.7	22117.8	2.71411	2.82985	21657.8	2.77198	12.8675	0.00052838	elmod2	GO:0005856 (cytoskeleton)	ELMO/CED-12 domain containing 2 [Source:ZFIN;Acc:ZDB-GENE-060824-2]	chr1:53887036-53945782
ENSDART00000051689	2.72066	2.76107	3.08337	10.4479	10.2498	2.85503	10.3489	-1.8601	0.000529341	si:ch211-12e13.6	GO:0016740 (transferase activity)	si:ch211-12e13.6 [Source:ZFIN;Acc:ZDB-GENE-060531-12]	chr5:9521364-9529423
ENSDART00000093148	8099.53	4671.57	3881.18	56.8532	45.7367	5550.76	51.295	6.69297	0.000532129	rab43		RAB43, member RAS oncogene family [Source:ZFIN;Acc:ZDB-GENE-030131-5864]	chr11:461198-473297
ENSDART00000083850	6.8432	3.23235	6.25375	494.244	640.8	5.4431	567.522	-6.76575	0.000539102	sdr42e2	GO:0008831 (dTDP-4-dehydrorhamnose reductase activity)	short chain dehydrogenase/reductase family 42E, member 2 [Source:ZFIN;Acc:ZDB-GENE-101203-3]	chr3:59248084-59288982
ENSDART00000150097	8.074	2.96518	5.83418	22282.7	18550.4	5.62445	20416.6	-11.9361	0.000548396	tbk1	GO:0005515 (protein binding)	TANK-binding kinase 1 [Source:ZFIN;Acc:ZDB-GENE-060512-359]	chr19:46929677-46944595
ENSDART00000040390	28416.3	14716.5	16790.7	2.84214	4.58671	19974.5	3.71442	12.3728	0.000561317	glrx3	GO:0015035 (protein disulfide oxidoreductase activity)	glutaredoxin 3 [Source:ZFIN;Acc:ZDB-GENE-041010-22]	chr12:44322076-44349512
ENSDART00000122781	6.73641	3.03445	2.7833	1812.01	2302.78	4.18472	2057.39	-9.05286	0.000575882	dusp8a	GO:0016787 (hydrolase activity)	dual specificity phosphatase 8a [Source:ZFIN;Acc:ZDB-GENE-040426-1842]	chr25:23699908-23776046
ENSDART00000051549	13243.3	34340.9	10921.5	2.90054	5.53679	19501.9	4.21866	12.0558	0.000594615	tp53	GO:0002039 (p53 binding)	tumor protein p53 [Source:ZFIN;Acc:ZDB-GENE-990415-270]	chr5:25755162-25766740
ENSDART00000081335	4461.53	3438.79	8886.55	19.3463	26.2498	5595.62	22.798	7.83536	0.0006065	rbb4l	GO:0005515 (protein binding)	retinoblastoma binding protein 4, like [Source:ZFIN;Acc:ZDB-GENE-030131-848]	chr11:12802549-12826559
ENSDART00000114330	8.1825	4.40121	3.05737	2677.05	2089.28	5.21369	2383.17	-8.9467	0.000614477	pdzrn3b	GO:0005515 (protein binding)	PDZ domain containing RING finger 3b [Source:ZFIN;Acc:ZDB-GENE-071022-4]	chr6:44175683-44333451
ENSDART00000029067	3.90299	7.97214	10.6725	11504.9	6599.81	7.51589	9052.35	-10.2973	0.000621604	hbp1	GO:0005515 (protein binding)	HMG-box transcription factor 1 [Source:ZFIN;Acc:ZDB-GENE-050522-414]	chr25:3507866-3527071
ENSDART00000058204	2.78526	8.17117	2.7589	3479.62	2223.19	4.57178	2851.4	-9.45075	0.00063519		GO:0005515 (protein binding)	Uncharacterized protein [Source:UniProtKB/TrEMBL;Acc:E7F1K9]	chr24:39726532-39727004
ENSDART00000003736	25150.5	34310.6	15100.6	2.75696	2.86894	24853.9	2.81295	13.0305	0.000650189	kal1b	GO:0005515 (protein binding)	Kallmann syndrome 1b sequence [Source:ZFIN;Acc:ZDB-GENE-000201-13]	chr22:41869267-41959136
ENSDART00000101404	7.30754	2.83023	8.73913	16989.3	12935.1	6.2923	14962.2	-11.3564	0.000654867	kif13a	GO:0005515 (protein binding)	kinesin family member 13A [Source:ZFIN;Acc:ZDB-GENE-090901-1]	chr16:56856093-56983544
ENSDART00000143885	6771.81	13068	8466.64	10.1578	6.51663	9435.47	8.33719	10.1246	0.000656877	gbp3	GO:0005515 (protein binding)	guanylate binding protein 3 [Source:ZFIN;Acc:ZDB-GENE-070912-176]	chr2:43955869-43980375
ENSDART00000111521	78.1524	64.3385	72.745	209.644	193.41	71.7453	201.527	-1.49346	0.000660552			Uncharacterized protein [Source:UniProtKB/TrEMBL;Acc:E7FEV7]	chr24:9828798-9831484
ENSDART00000077753	7278.62	15734.7	8704.23	41.9158	35.5972	10572.5	38.7565	8.01465	0.000672537	foxc1b	GO:0031490 (chromatin DNA binding)	forkhead box C1b [Source:ZFIN;Acc:ZDB-GENE-010302-2]	chr20:26731984-26733938
ENSDART00000013839	10574.2	2665.23	6137.44	2.76416	4.20961	6458.95	3.48689	10.6736	0.000696417	tmbim4	GO:0003674 (molecular_function)	transmembrane BAX inhibitor motif containing 4 [Source:ZFIN;Acc:ZDB-GENE-040426-2152]	chr4:12035779-12043449
ENSDART00000124701	112.051	116.879	78.6462	1120.69	1385.63	102.525	1253.16	-3.62519	0.000718411		GO:0004930 (G-protein coupled receptor activity)	Uncharacterized protein [Source:UniProtKB/TrEMBL;Acc:E7FEK5]	chr2:7151503-7153771
ENSDART00000055252	3346.95	10536.4	3993.04	7.84285	11.7969	5958.79	9.81986	9.07914	0.000723057	zgc:110046	GO:0003674 (molecular_function)	chromosome 19 open reading frame 52 [Source:HGNC Symbol;Acc:HGNC:25152]	chr3:34266131-34267883
ENSDART00000151812	6.02698	4.71716	4.48523	22173.6	16666.2	5.07646	19419.9	-11.8991	0.000731188			cdna:known chromosome:Zv9:19:46941261:46944055:1 gene:ENSDARG00000063708 gene_biotype:protein_coding transcript_biotype:retained_intron	chr19:46941261-46944055
ENSDART00000142416	2.91359	3.02911	2.77296	26.344	28.523	2.90522	27.4335	-3.23902	0.000738837	si:dkey-236e20.3	GO:0008146 (sulfotransferase activity)	si:dkey-236e20.3 [Source:ZFIN;Acc:ZDB-GENE-060503-722]	chr22:15469538-15473417
ENSDART00000122050	7.37677	2.76022	2.70971	2590.68	1911.05	4.28223	2250.87	-9.191	0.000748234			mesothelin [Source:HGNC Symbol;Acc:HGNC:7371]	chr1:60198285-60201640
ENSDART00000034523	10860.9	8743.24	4786.68	51.5667	42.3375	8130.27	46.9521	7.36242	0.000756637	tars	GO:0004829 (threonine-tRNA ligase activity)	threonyl-tRNA synthetase [Source:ZFIN;Acc:ZDB-GENE-041010-218]	chr5:45965273-45989759
ENSDART00000121445	42492.9	18032.9	36233.1	92.1455	76.4283	32252.9	84.2869	8.49516	0.000770435	scaf1		SR-related CTD-associated factor 1 [Source:ZFIN;Acc:ZDB-GENE-120215-214]	chr3:32614758-32627597
ENSDART00000111557	45824.7	37865.9	41583.8	16696.7	15399.4	41758.1	16048.1	1.37646	0.000800718	calr	GO:0051082 (unfolded protein binding)	calreticulin [Source:ZFIN;Acc:ZDB-GENE-000208-17]	chr22:4339290-4410265
ENSDART00000110767	3784.24	14157.9	9589.09	14.4683	8.73458	9177.06	11.6015	9.47664	0.000800857	nav3	GO:0005515 (protein binding)	neuron navigator 3 [Source:ZFIN;Acc:ZDB-GENE-021205-1]	chr4:19635815-19926134
ENSDART00000125512	162.134	216.012	202.034	10171	8150.72	193.393	9160.85	-5.56762	0.00080384	pdzd2	GO:0005515 (protein binding)	PDZ domain containing 2 [Source:ZFIN;Acc:ZDB-GENE-060526-297]	chr5:42554616-42668272
ENSDART00000138181	5279.5	5835.9	5045.16	2009.79	2178.62	5386.85	2094.2	1.36152	0.000814197	rrbp1a	GO:0030176 (integral component of endoplasmic reticulum membrane)	ribosome binding protein 1 homolog a (dog) [Source:ZFIN;Acc:ZDB-GENE-030131-9795]	chr13:33836178-33863525
ENSDART00000142638	14.9932	5.73735	15.5313	3565.89	2239.52	12.0873	2902.71	-8.00327	0.000815694	mroh1	GO:0005488 (binding)	maestro heat-like repeat family member 1 [Source:ZFIN;Acc:ZDB-GENE-090806-2]	chr16:33563197-33646529
ENSDART00000112243	9811.22	4060.22	4382.76	33.4481	20.8121	6084.73	27.1301	7.72679	0.000823965	crlf1a	GO:0005515 (protein binding)	cytokine receptor-like factor 1a [Source:ZFIN;Acc:ZDB-GENE-040718-397]	chr2:41977713-42021750
ENSDART00000135934	12818.4	35637.7	9556.28	4.89204	3.61198	19337.5	4.25201	11.9248	0.000838127	tp53	GO:0044212 (transcription regulatory region DNA binding)	tumor protein p53 [Source:ZFIN;Acc:ZDB-GENE-990415-270]	chr5:25755162-25766740
ENSDART00000147499	210.334	259.075	144.35	6897.94	7808.22	204.586	7353.08	-5.20563	0.00086563	atg9b		ATG9 autophagy related 9 homolog B (S. cerevisiae) [Source:ZFIN;Acc:ZDB-GENE-091111-3]	chr24:35064904-35098243
ENSDART00000009788	14257.2	24490	12494.8	74.1301	67.2917	17080.7	70.7109	7.85394	0.000870831	ddx19	GO:0016787 (hydrolase activity)	DEAD/H (Asp-Glu-Ala-Asp/His) box polypeptide 19 (DBP5 homolog, yeast) [Source:ZFIN;Acc:ZDB-GENE-020419-30]	chr11:3585467-3597690
ENSDART00000046670	16034.2	6867.32	9494.34	2.69281	2.72679	10798.6	2.7098	11.8709	0.000894193	thop1	GO:0004222 (metalloendopeptidase activity)	thimet oligopeptidase 1 [Source:ZFIN;Acc:ZDB-GENE-040718-47]	chr11:7323094-7352166
ENSDART00000110381	10944.1	2933.37	3181.48	6.11894	3.63681	5686.33	4.87787	9.95259	0.00089504	zgc:175128	GO:0046872 (metal ion binding)	early growth response 4 [Source:HGNC Symbol;Acc:HGNC:3241]	chr23:45964749-45966878
ENSDART00000129273	882.936	984.297	1094.07	250.096	221.296	987.1	235.696	2.06345	0.00089696	rps6ka1	GO:0016773 (phosphotransferase activity, alcohol group as acceptor)	ribosomal protein S6 kinase a, polypeptide 1 [Source:ZFIN;Acc:ZDB-GENE-060929-516]	chr17:26905982-27013235
ENSDART00000063129	2568.31	1556.79	4040.45	4.41308	5.23216	2721.85	4.82262	9.03916	0.000903239	cmc1	GO:0003674 (molecular_function)	COX assembly mitochondrial protein 1 homolog (S. cerevisiae) [Source:ZFIN;Acc:ZDB-GENE-040426-2626]	chr16:58759537-58776475
ENSDART00000124902	76.7909	84.277	63.7924	287.349	312.106	74.9534	299.727	-2.00786	0.000919118		GO:0003684 (damaged DNA binding)	Uncharacterized protein [Source:UniProtKB/TrEMBL;Acc:E7F415]	chr12:19995985-20000552
ENSDART00000132660	9809.22	7613.12	4309.78	2.9364	2.86278	7244.04	2.89959	11.2068	0.000951639	polr3gla		polymerase (RNA) III (DNA directed) polypeptide G like a [Source:ZFIN;Acc:ZDB-GENE-040912-67]	chr19:25031817-25041600
ENSDART00000153969	44.2258	70.9454	43.2007	7991.74	8205.26	52.7906	8098.5	-7.3005	0.000951834			cdna:known chromosome:Zv9:3:27203309:27205468:1 gene:ENSDARG00000044588 gene_biotype:protein_coding transcript_biotype:retained_intron	chr3:27203309-27205468
ENSDART00000063258	9568.4	3438.31	9052.24	14.5506	8.03023	7352.98	11.2904	9.27098	0.000959791	abhd17ab	GO:0008236 (serine-type peptidase activity)	abhydrolase domain containing 17Ab [Source:ZFIN;Acc:ZDB-GENE-081105-136]	chr8:19753049-19771287
ENSDART00000123048	6915.23	2984.17	2301.37	13.4491	7.76461	4066.92	10.6068	8.46914	0.000965625	hnrnpd	GO:0000166 (nucleotide binding)	heterogeneous nuclear ribonucleoprotein D [Source:ZFIN;Acc:ZDB-GENE-070424-97]	chr10:5004025-5020399
ENSDART00000141606	9128.68	4290.58	8842.53	2.73266	2.79016	7420.6	2.76141	11.3125	0.000969209	commd8	GO:0003674 (molecular_function)	COMM domain containing 8 [Source:ZFIN;Acc:ZDB-GENE-061103-124]	chr13:12247231-12258905
ENSDART00000131059	4464.44	3524.06	9629.01	18.0373	30.0305	5872.5	24.0339	7.83952	0.000971826	rbb4l	GO:0005515 (protein binding)	retinoblastoma binding protein 4, like [Source:ZFIN;Acc:ZDB-GENE-030131-848]	chr11:12802549-12826559
ENSDART00000139408	10177.1	20070.8	25584.7	42.7535	72.0394	18610.8	57.3964	8.2886	0.000974024	hmga1a	GO:0003677 (DNA binding)	high mobility group AT-hook 1a [Source:ZFIN;Acc:ZDB-GENE-010502-1]	chr23:3765200-3773434
ENSDART00000143008	30681.7	15006.1	16305.3	35.8137	38.7339	20664.4	37.2738	9.03816	0.000977489			cdna:known chromosome:Zv9:1:2053377:2055992:1 gene:ENSDARG00000040245 gene_biotype:protein_coding transcript_biotype:processed_transcript	chr1:2053377-2055992
ENSDART00000026000	3515.16	3129.73	6642.88	2.67229	2.71393	4429.26	2.69311	10.6004	0.00100087		GO:0005515 (protein binding)	Uncharacterized protein [Source:UniProtKB/TrEMBL;Acc:E7EXL6]	chr13:29462452-29512846
ENSDART00000111150	2358.23	1952.01	1151.35	2.69821	2.81132	1820.53	2.75476	9.30616	0.00100841	birc2	GO:0005515 (protein binding)	baculoviral IAP repeat-containing 2 [Source:ZFIN;Acc:ZDB-GENE-030825-6]	chr21:21948887-21966212
ENSDART00000135703	91.3807	51.6965	28.9312	18689.6	10969.1	57.3361	14829.3	-8.11876	0.00100995	hsbp1b		heat shock factor binding protein 1b [Source:ZFIN;Acc:ZDB-GENE-040426-1721]	chr18:13920193-13923528
ENSDART00000108827	3299.51	8293.34	3469.74	14.2923	11.4735	5020.86	12.8829	8.47676	0.00101035	c1galt1c1	GO:0003674 (molecular_function)	C1GALT1-specific chaperone 1 [Source:ZFIN;Acc:ZDB-GENE-030131-2772]	chr14:34490501-34496057
ENSDART00000012873	4042.3	8006.53	4344.33	29.1218	26.1693	5464.39	27.6456	7.55736	0.00101694	klf12a	GO:0046872 (metal ion binding)	Kruppel-like factor 12a [Source:ZFIN;Acc:ZDB-GENE-030131-9188]	chr1:34129536-34189404
ENSDART00000142388	15477.5	13517	4592.97	28.4611	16.1468	11195.8	22.3039	8.84648	0.00102759	srsf7a	GO:0008270 (zinc ion binding)	serine/arginine-rich splicing factor 7a [Source:ZFIN;Acc:ZDB-GENE-040426-1798]	chr5:38495708-38499307
ENSDART00000103246	40612.6	16722.3	34717.4	94.5054	79.4884	30684.1	86.9969	8.37	0.00103155	scaf1		SR-related CTD-associated factor 1 [Source:ZFIN;Acc:ZDB-GENE-120215-214]	chr3:32614758-32627597
ENSDART00000025940	16895.1	4425.17	7999.01	8.59513	16.1788	9773.09	12.387	9.4807	0.0010513	ywhaba	GO:0019904 (protein domain specific binding)	tyrosine 3-monooxygenase/tryptophan 5-monooxygenase activation protein, beta polypeptide a [Source:ZFIN;Acc:ZDB-GENE-030131-6583]	chr6:52163393-52176108
ENSDART00000025308	8.13164	2.70032	3.60738	941.478	661.865	4.81311	801.671	-7.52205	0.00105651	tbc1d19	GO:0005097 (Rab GTPase activator activity)	TBC1 domain family, member 19 [Source:ZFIN;Acc:ZDB-GENE-040426-1265]	chr7:62891154-62955428
ENSDART00000134126	16456.4	27491.7	21622.4	1859.5	1450.94	21856.8	1655.22	3.7027	0.00105949			cdna:known chromosome:Zv9:17:51232009:51266605:1 gene:ENSDARG00000020242 gene_biotype:protein_coding transcript_biotype:retained_intron	chr17:51232009-51266605
ENSDART00000157107	7.48328	4.9626	7.02686	2603.05	1845.01	6.49091	2224.03	-8.42182	0.00106581	si:ch211-51i16.3	GO:0003956 (NAD(P)+-protein-arginine ADP-ribosyltransferase activity)	si:ch211-51i16.3 [Source:ZFIN;Acc:ZDB-GENE-131127-411]	chr3:7944095-7952874
ENSDART00000150099	38.1559	37.166	30.8854	1047.79	1264.11	35.4024	1155.95	-5.02899	0.00107402			cdna:known chromosome:Zv9:4:62029073:62032836:1 gene:ENSDARG00000078014 gene_biotype:protein_coding transcript_biotype:retained_intron	chr4:62029073-62032836
ENSDART00000156432	16.6045	29.4092	26.905	5129.99	5182.96	24.3063	5156.48	-7.77165	0.00107585	si:ch73-140j24.5	GO:0042765 (GPI-anchor transamidase complex)	glycosylphosphatidylinositol anchor attachment 1 [Source:HGNC Symbol;Acc:HGNC:4446]	chr2:2471770-2488835
ENSDART00000149507	7054.22	4974.87	1610.43	4.36445	2.72035	4546.51	3.5424	10.1212	0.00107591	ddx10	GO:0016787 (hydrolase activity)	DEAD (Asp-Glu-Ala-Asp) box polypeptide 10 [Source:ZFIN;Acc:ZDB-GENE-071022-2]	chr21:24398267-24449505
ENSDART00000137518	45.8143	43.0041	50.3771	96.5186	90.5461	46.3985	93.5323	-1.01372	0.00109212	cspg5b		chondroitin sulfate proteoglycan 5b [Source:ZFIN;Acc:ZDB-GENE-060503-368]	chr19:18859894-18921149
ENSDART00000138985	5286.29	10570	2856.1	2.71527	3.51849	6237.45	3.11688	10.7772	0.00109736	gnaia	GO:0031821 (G-protein coupled serotonin receptor binding)	guanine nucleotide binding protein (G protein), alpha inhibiting activity polypeptide a [Source:ZFIN;Acc:ZDB-GENE-030131-2229]	chr25:21668141-21701477
ENSDART00000062841	325.406	255.829	154.625	7322.52	5563.16	245.286	6442.84	-4.76732	0.00109755	si:dkey-27j5.4	GO:0005543 (phospholipid binding)	epsin 3 [Source:HGNC Symbol;Acc:HGNC:18235]	chr1:57678409-57686557
ENSDART00000065949	7577.02	22018.8	19669.7	42.7353	23.4841	16421.8	33.1097	8.8737	0.00109911	top1l	GO:0016853 (isomerase activity)	topoisomerase (DNA) I, like [Source:ZFIN;Acc:ZDB-GENE-060616-217]	chr11:26229925-26245239
ENSDART00000103374	13.4592	15.9057	11.975	72.9031	85.7924	13.78	79.3478	-2.53069	0.00111463	si:rp71-86g14.3	GO:0015078 (hydrogen ion transmembrane transporter activity)	ATPase, H+ transporting, lysosomal 42kDa, V1 subunit C2 [Source:HGNC Symbol;Acc:HGNC:18264]	chr17:52181639-52205532
ENSDART00000152493	14.1951	5.52932	4.43401	7727.62	6002.14	8.0528	6864.88	-9.91919	0.00111529			cdna:known chromosome:Zv9:1:31263145:31310648:-1 gene:ENSDARG00000058231 gene_biotype:protein_coding transcript_biotype:retained_intron	chr1:31263145-31310648
ENSDART00000124499	89.8243	57.7728	26.5491	8807	13509.7	58.0487	11158.3	-7.72242	0.00111968	hprt1	GO:0004422 (hypoxanthine phosphoribosyltransferase activity)	hypoxanthine phosphoribosyltransferase 1 [Source:ZFIN;Acc:ZDB-GENE-040426-1918]	chr14:32379801-32391422
ENSDART00000136103	5685.61	6755.42	1921.76	2.74073	3.71745	4787.6	3.22909	10.3599	0.00112031	ubap2	GO:0005515 (protein binding)	ubiquitin associated protein 2 [Source:ZFIN;Acc:ZDB-GENE-070424-16]	chr21:10340797-10379322
ENSDART00000080829	16790.7	27487.1	22267.1	12.1607	18.1816	22181.6	15.1711	10.5139	0.0011207	hspa14	GO:0000166 (nucleotide binding)	heat shock protein 14 [Source:ZFIN;Acc:ZDB-GENE-041210-73]	chr4:8654722-8663927
ENSDART00000130671	1331.85	2445.61	4012.76	3.6222	4.45833	2596.74	4.04027	9.19517	0.00114558	prdm1b	GO:0005515 (protein binding)	PR domain containing 1b, with ZNF domain [Source:ZFIN;Acc:ZDB-GENE-080618-2]	chr19:50139187-50153197
ENSDART00000024140	36101.2	39545.6	31206.3	6075.58	7042.5	35617.7	6559.04	2.43817	0.00115087	kpnb1	GO:0005488 (binding)	karyopherin (importin) beta 1 [Source:ZFIN;Acc:ZDB-GENE-030131-2579]	chr19:49796246-49809511
ENSDART00000122348	2.92342	2.95166	2.79564	6.10064	5.83285	2.89024	5.96675	-1.04579	0.00115894	gad1b	GO:0016829 (lyase activity)	glutamate decarboxylase 1b [Source:ZFIN;Acc:ZDB-GENE-030909-3]	chr6:3642627-3676989
ENSDART00000061037	3378.16	2928.78	3099.5	7490.91	6914.19	3135.48	7202.55	-1.20116	0.00117737	si:dkey-194e6.1	GO:0008241 (peptidyl-dipeptidase activity)	transmembrane protein 27 [Source:HGNC Symbol;Acc:HGNC:29437]	chr23:41146930-41169410
ENSDART00000081245	30547.1	22763.7	19481.9	2491.12	2240.93	24264.2	2366.03	3.33478	0.00117788	dhx15	GO:0016787 (hydrolase activity)	DEAH (Asp-Glu-Ala-His) box polypeptide 15 [Source:ZFIN;Acc:ZDB-GENE-030131-650]	chr7:73835483-73888548
ENSDART00000054274	11279.7	20051.9	17683.9	269.347	385.544	16338.5	327.445	5.62231	0.0011827	macf1	GO:0005515 (protein binding)	microtubule-actin crosslinking factor 1 [Source:ZFIN;Acc:ZDB-GENE-030131-3606]	chr19:36588262-36888387
ENSDART00000156916	11368.1	17731.4	5580.55	34.2168	46.131	11560	40.1739	8.03215	0.00118307			cdna:known_by_projection chromosome:Zv9:25:32167241:32187385:1 gene:ENSDARG00000027310 gene_biotype:protein_coding transcript_biotype:retained_intron	chr25:32167241-32187385
ENSDART00000149107	44354.2	12719.4	32698.3	6.01061	2.72386	29924	4.36723	12.6729	0.00118906	nap1l4a	GO:0005634 (nucleus)	nucleosome assembly protein 1-like 4a [Source:ZFIN;Acc:ZDB-GENE-030131-9099]	chr25:24278958-24306456
ENSDART00000127192	121.097	74.643	64.4706	20358.6	20192.4	86.7368	20275.5	-7.92326	0.0011951	zgc:162431			chr23:30251819-30284312
ENSDART00000145172	6897.94	5327.3	3134.11	12.3607	11.5097	5119.78	11.9352	8.67209	0.00119873	eif4g3b	GO:0005488 (binding)	eukaryotic translation initiation factor 4 gamma, 3b [Source:ZFIN;Acc:ZDB-GENE-090312-49]	chr23:22272958-22354472
ENSDART00000154629	1191.92	930.105	646.046	40.7165	29.416	922.691	35.0663	4.69224	0.00121573			cdna:known_by_projection chromosome:Zv9:17:21663739:21689179:-1 gene:ENSDARG00000025311 gene_biotype:protein_coding transcript_biotype:processed_transcript	chr17:21663739-21689179
GENSCAN00000026195	316.498	213.592	144.489	6154.81	8782.14	224.86	7468.48	-5.10407	0.00121899			cdna:genscan chromosome:Zv9:14:40645306:40659553:1 transcript_biotype:protein_coding	chr14:40645306-40659553
ENSDART00000065033	1448.49	2410.63	6308.61	6.16863	3.78876	3389.25	4.9787	9.17954	0.00122191	ngf	GO:0005102 (receptor binding)	nerve growth factor (beta polypeptide) [Source:ZFIN;Acc:ZDB-GENE-000629-2]	chr6:49110020-49156427
ENSDART00000152044	13053	11017.7	3669.9	29.3093	16.5186	9246.86	22.914	8.52073	0.00123295			cdna:known chromosome:Zv9:5:38495785:38498125:1 gene:ENSDARG00000035325 gene_biotype:protein_coding transcript_biotype:retained_intron	chr5:38495785-38498125
GENSCAN00000014301	7.35003	3.47593	2.81837	9198.63	9861.11	4.54811	9529.87	-11.1607	0.00123429			cdna:genscan chromosome:Zv9:14:31860184:31947546:-1 transcript_biotype:protein_coding	chr14:31860184-31947546
ENSDART00000100321	18859.9	44789.3	12391.4	16.5915	21.5575	25346.9	19.0745	10.1757	0.00124708	timm10	GO:0046872 (metal ion binding)	translocase of inner mitochondrial membrane 10 homolog (yeast) [Source:ZFIN;Acc:ZDB-GENE-040718-427]	chr1:44846027-44849977
ENSDART00000132365	5795.55	6612.55	2975.58	4.85251	8.49518	5127.9	6.67385	9.56087	0.00125113	b3gnt5a	GO:0047256 (lactosylceramide 1,3-N-acetyl-beta-D-glucosaminyltransferase activity)	UDP-GlcNAc:betaGal beta-1,3-N-acetylglucosaminyltransferase 5a [Source:ZFIN;Acc:ZDB-GENE-030131-8470]	chr11:10605252-10614375
ENSDART00000023745	3.68317	4.23706	4.25183	8.80776	8.1692	4.05735	8.48848	-1.06712	0.00125184	zgc:101737	GO:0003674 (molecular_function)	coiled-coil domain containing 114 [Source:HGNC Symbol;Acc:HGNC:26560]	chr11:42189798-42204454
ENSDART00000074605	8743.24	5583.59	13305.8	74.3418	88.3347	9210.87	81.3382	6.73973	0.00125982	pkp1b	GO:0005488 (binding)	plakophilin 1b [Source:ZFIN;Acc:ZDB-GENE-030131-417]	chr6:54666464-54709200
ENSDART00000146870	21380.8	21515.7	59385.8	2.73782	2.8791	34094.1	2.80846	13.389	0.00126695	si:ch1073-412h12.3		si:ch1073-412h12.3 [Source:ZFIN;Acc:ZDB-GENE-081104-86]	chr20:3329033-3329636
ENSDART00000132338	26.1759	48.9033	20.2617	4954.54	3032.48	31.7803	3993.51	-7.03284	0.00127818	igl3v2	GO:0005515 (protein binding)	immunoglobulin light 3 variable 2 [Source:ZFIN;Acc:ZDB-GENE-060503-410]	chr24:39704103-39704578
ENSDART00000122081	191.626	389.34	163.043	12534	19369.6	248.003	15951.8	-6.08215	0.00128959	sybu		syntabulin (syntaxin-interacting) [Source:ZFIN;Acc:ZDB-GENE-060929-1202]	chr16:41813327-41834018
ENSDART00000098889	10725.3	10863.2	9326.88	3524.06	3444.77	10305.1	3484.41	1.56108	0.00129613	caprin1b	GO:0003674 (molecular_function)	cell cycle associated protein 1b [Source:ZFIN;Acc:ZDB-GENE-040426-2020]	chr18:36685086-36708587
ENSDART00000054691	31837.3	12889.3	15294	14.2651	26.2628	20006.9	20.2639	9.89632	0.00129989	uba1	GO:0008641 (small protein activating enzyme activity)	ubiquitin-like modifier activating enzyme 1 [Source:ZFIN;Acc:ZDB-GENE-040426-2009]	chr23:20929034-20953171
ENSDART00000076084	25.0429	5.69358	17.0257	9920.58	5948.18	15.9207	7934.38	-9.15879	0.00131463	npm2b	GO:0003676 (nucleic acid binding)	nucleophosmin/nucleoplasmin, 2b [Source:ZFIN;Acc:ZDB-GENE-070410-125]	chr10:45752921-45759514
ENSDART00000080075	14815.3	14223.6	10473	1047.48	1096.34	13170.6	1071.91	3.60281	0.00132544	phb	GO:0016020 (membrane)	prohibitin [Source:ZFIN;Acc:ZDB-GENE-030131-6577]	chr3:15341405-15351593
ENSDART00000057567	2.69188	11.2652	5.85199	3051.19	1668	6.60303	2359.6	-8.64908	0.00134573	si:ch211-240l19.5	GO:0005515 (protein binding)	si:ch211-240l19.5 [Source:ZFIN;Acc:ZDB-GENE-041210-327]	chr4:7222957-7224116
GENSCAN00000004285	41.1815	57.039	30.4104	614.74	501.475	42.877	558.107	-3.74217	0.00134619			cdna:genscan chromosome:Zv9:7:76474731:76487017:-1 transcript_biotype:protein_coding	chr7:76474731-76487017
ENSDART00000121806	1092.32	2338.72	1221.27	25.1752	37.8974	1550.77	31.5363	5.56397	0.00138562	cdc5l	GO:0003682 (chromatin binding)	CDC5 cell division cycle 5-like (S. pombe) [Source:ZFIN;Acc:ZDB-GENE-040426-821]	chr17:4828949-4873736
ENSDART00000052385	20740.7	5521.01	19645.9	14.0549	27.8677	15302.5	20.9613	9.37085	0.00139199	tph1b	GO:0004510 (tryptophan 5-monooxygenase activity)	tryptophan hydroxylase 1b [Source:ZFIN;Acc:ZDB-GENE-030805-6]	chr7:34440842-34449394
ENSDART00000074110	4.33653	2.76318	9.56243	2142.35	2799.02	5.55404	2470.69	-8.97776	0.00140457	si:ch211-51i16.3	GO:0003956 (NAD(P)+-protein-arginine ADP-ribosyltransferase activity)	si:ch211-51i16.3 [Source:ZFIN;Acc:ZDB-GENE-131127-411]	chr3:7944095-7952874
ENSDART00000091132	30.8226	18.5516	18.775	1900.89	1904.64	22.7164	1902.76	-6.4305	0.00140491	si:ch211-59o9.9	GO:0005515 (protein binding)		chr25:19975270-20011317
ENSDART00000005479	7765.22	2985.88	4946.92	3.12483	3.15343	5232.67	3.13913	10.596	0.00140604	chm	GO:0004663 (Rab geranylgeranyltransferase activity)	choroideremia (Rab escort protein 1) [Source:ZFIN;Acc:ZDB-GENE-030318-2]	chr21:33652581-33759726
ENSDART00000144303	4309.78	12153.6	8735.16	2.84166	2.97183	8399.52	2.90674	11.3727	0.00142786	zgc:86811	GO:0005524 (ATP binding)	zgc:86811 [Source:ZFIN;Acc:ZDB-GENE-040625-113]	chr5:27844086-27847794
ENSDART00000110091	577.863	657.665	464.712	3573.65	3344.11	566.747	3458.88	-2.6233	0.001469		GO:0005515 (protein binding)	Uncharacterized protein [Source:UniProtKB/TrEMBL;Acc:F1QFC8]	chr2:36059920-36060430
ENSDART00000127397	1595.63	921.138	524.291	9.03522	12.9934	1013.69	11.0143	6.40283	0.0014721	utp15	GO:0005515 (protein binding)	utp15, U3 small nucleolar ribonucleoprotein, homolog [Source:ZFIN;Acc:ZDB-GENE-030131-3831]	chr18:6123286-6142697
ENSDART00000124650	1359.05	4173.44	5796.37	6.75033	4.40279	3776.28	5.57656	9.19876	0.0014821	ralbp1	GO:0005622 (intracellular)	ralA binding protein 1 [Source:ZFIN;Acc:ZDB-GENE-040426-2098]	chr2:53435983-53470581
ENSDART00000083190	3122.56	8708.71	4252	33.5561	56.077	5361.09	44.8166	6.81131	0.00148606	hdac8	GO:0004553 (hydrolase activity, hydrolyzing O-glycosyl compounds)	histone deacetylase 8 [Source:ZFIN;Acc:ZDB-GENE-040426-2772]	chr7:53111279-53204522
ENSDART00000121787	1771.17	7972.91	4605.55	7.47445	4.95448	4783.21	6.21446	9.36816	0.00148608	nol10	GO:0005515 (protein binding)	nucleolar protein 10 [Source:ZFIN;Acc:ZDB-GENE-040426-764]	chr17:52208739-52247113
ENSDART00000008144	4460.41	3466.28	9376.02	15.1304	27.0598	5767.57	21.0951	8.02024	0.00149244	rbb4l	GO:0005515 (protein binding)	retinoblastoma binding protein 4, like [Source:ZFIN;Acc:ZDB-GENE-030131-848]	chr11:12802549-12826559
GENSCAN00000003023	11860.6	11939.7	14054.3	33197.4	30050.5	12618.2	31623.9	-1.32824	0.00149251			cdna:genscan scaffold:Zv9:Zv9_scaffold3472:160412:162152:-1 transcript_biotype:protein_coding
ENSDART00000128070	13245.5	14731.1	3128.92	10.1337	5.98567	10368.5	8.05969	10.0891	0.00150356	gnai2a	GO:0001664 (G-protein coupled receptor binding)	guanine nucleotide binding protein (G protein), alpha inhibiting activity polypeptide 2a [Source:ZFIN;Acc:ZDB-GENE-030131-8365]	chr11:35635060-35755762
ENSDART00000127496	9.82091	12.4443	9.3291	10338.6	7671.9	10.5314	9005.24	-9.73556	0.00153119	loxl1	GO:0016641 (oxidoreductase activity, acting on the CH-NH2 group of donors, oxygen as acceptor)	lysyl oxidase-like 1 [Source:ZFIN;Acc:ZDB-GENE-060503-693]	chr18:48978530-49006206
ENSDART00000097944	59952.9	26193	16987.6	262.464	164.022	34377.8	213.243	7.17002	0.00153627		GO:0005337 (nucleoside transmembrane transporter activity)	solute carrier family 29 (equilibrative nucleoside transporter), member 2 [Source:HGNC Symbol;Acc:HGNC:11004]	chr7:73964542-73970958
ENSDART00000074551	272.871	284.25	168.428	2497.76	2926.23	241.849	2711.99	-3.52093	0.00154223	si:dkey-90l8.3	GO:0046872 (metal ion binding)	si:dkey-90l8.3 [Source:ZFIN;Acc:ZDB-GENE-081105-149]	chr8:55043859-55054130
ENSDART00000020249	1921.17	11171.2	4109.08	4.59085	2.73469	5733.81	3.66277	10.2949	0.00155949	dusp5	GO:0004721 (phosphoprotein phosphatase activity)	dual specificity phosphatase 5 [Source:ZFIN;Acc:ZDB-GENE-010625-1]	chr22:32601001-32612547
ENSDART00000047844	60.2544	47.631	47.687	155.21	139.398	51.8575	147.304	-1.51312	0.00158941	col2a1b	GO:0005201 (extracellular matrix structural constituent)	collagen type II, alpha-1b [Source:ZFIN;Acc:ZDB-GENE-050302-9]	chr11:100635-120089
ENSDART00000152036	4.72887	6.17122	5.5041	28.6099	33.8881	5.46807	31.249	-2.51806	0.00159921			cdna:known chromosome:Zv9:25:29119935:29135870:1 gene:ENSDARG00000013312 gene_biotype:protein_coding transcript_biotype:retained_intron	chr25:29119935-29135870
ENSDART00000079600	5280.91	9894.12	2647.38	22.0479	11.5435	5940.8	16.7957	8.34064	0.00161295	minpp1a	GO:0003993 (acid phosphatase activity)	multiple inositol polyphosphate histidine phosphatase, 1a [Source:ZFIN;Acc:ZDB-GENE-060929-1194]	chr17:23540486-23557805
ENSDART00000015801	4893.79	7180.29	5656.98	370.666	373.61	5910.35	372.138	3.97111	0.00162568	dcbld1	GO:0007155 (cell adhesion)	discoidin, CUB and LCCL domain containing 1 [Source:ZFIN;Acc:ZDB-GENE-050913-77]	chr20:42327987-42410725
ENSDART00000154131	243.875	252.721	145.693	5.70945	3.90341	214.096	4.80643	5.46035	0.00162742	si:ch73-265h17.1		von Willebrand factor A domain containing 5A [Source:HGNC Symbol;Acc:HGNC:6658]	chr25:5314045-5336957
ENSDART00000050863	5985.45	7986.19	5009.57	9.50754	14.1054	6327.07	11.8065	9.06671	0.00163375	zgc:101858	GO:0016491 (oxidoreductase activity)	zgc:101858 [Source:ZFIN;Acc:ZDB-GENE-040927-13]	chr5:68434002-68438636
ENSDART00000020456	17.3466	16.8354	31.2117	508.704	362.133	21.7979	435.418	-4.36085	0.00163396		GO:0008237 (metallopeptidase activity)	matrix metallopeptidase 15 (membrane-inserted) [Source:HGNC Symbol;Acc:HGNC:7161]	chr7:66655028-66721760
ENSDART00000047201	21363.4	11534.2	5719.76	12.0097	15.1985	12872.4	13.6041	9.69675	0.001635	atp2a2b	GO:0005388 (calcium-transporting ATPase activity)	ATPase, Ca++ transporting, cardiac muscle, slow twitch 2b [Source:ZFIN;Acc:ZDB-GENE-030131-867]	chr21:15563063-15618633
ENSDART00000146118	4320.7	4390.74	3953.31	9011.99	8944.74	4221.58	8978.37	-1.09018	0.00165514			havana:processed_transcript chromosome:Zv9:10:4991168:4995440:1 gene:ENSDARG00000086996 gene_biotype:processed_transcript transcript_biotype:processed_transcript	chr10:4991168-4995440
ENSDART00000009477	63368.8	64414.7	46560	15251.7	13166.6	58114.5	14209.1	2.02049	0.00166023	cct8	GO:0051082 (unfolded protein binding)	chaperonin containing TCP1, subunit 8 (theta) [Source:ZFIN;Acc:ZDB-GENE-040426-876]	chr10:25963452-25979373
ENSDART00000140173	3624.95	3488.87	8943.11	2.71863	2.66977	5352.31	2.6942	10.8098	0.00166763	si:dkeyp-110e4.6	GO:0003824 (catalytic activity)	si:dkeyp-110e4.6 [Source:ZFIN;Acc:ZDB-GENE-030219-75]	chr14:27436092-27446049
ENSDART00000132816	14.3968	15.7273	7.02767	2741.11	2495.66	12.3839	2618.38	-7.80757	0.00167157		GO:0005515 (protein binding)	Uncharacterized protein [Source:UniProtKB/TrEMBL;Acc:F1Q7U4]	chr24:41257798-41258448
GENSCAN00000034800	24.5442	38.5729	45.5113	1497.63	1027.36	36.2095	1262.5	-5.14494	0.00167403			cdna:genscan chromosome:Zv9:2:49174920:49177703:1 transcript_biotype:protein_coding	chr2:49174920-49177703
ENSDART00000005195	7725.8	2936.09	3332.02	3.62231	3.85839	4664.64	3.74035	10.1433	0.00168956	bsdc1	GO:0003674 (molecular_function)	BSD domain containing 1 [Source:ZFIN;Acc:ZDB-GENE-040905-1]	chr13:46547570-46567520
ENSDART00000052062	3991.56	11882.2	8859.65	101.788	73.8299	8244.48	87.809	6.43298	0.00171775	angptl4		angiopoietin-like 4 [Source:ZFIN;Acc:ZDB-GENE-041111-222]	chr2:23321628-23327384
ENSDART00000147735	7.10181	7.55297	6.53213	2.67667	2.69946	7.0623	2.68807	1.39104	0.0017363	si:dkey-24l11.3	GO:0046872 (metal ion binding)	si:dkey-24l11.3 [Source:ZFIN;Acc:ZDB-GENE-050419-162]	chr18:26824839-26839099
ENSDART00000123987	783.803	994.152	905.951	2075.45	2257.34	894.635	2166.4	-1.28149	0.00175743			ncrna:rRNA scaffold:Zv9:Zv9_scaffold3533:2575:2675:1 gene:ENSDARG00000086875 gene_biotype:rRNA transcript_biotype:rRNA
ENSDART00000140583	7941.26	6933.83	3457.9	27.3662	30.1414	6111	28.7538	7.64609	0.0017646			cdna:known chromosome:Zv9:21:17812615:17817207:1 gene:ENSDARG00000057556 gene_biotype:protein_coding transcript_biotype:processed_transcript	chr21:17812615-17817207
ENSDART00000125291	70.3073	43.7636	36.3067	672.633	527.934	50.1259	600.284	-3.62914	0.00177416	ksr2	GO:0004713 (protein tyrosine kinase activity)	kinase suppressor of ras 2 [Source:ZFIN;Acc:ZDB-GENE-030131-8047]	chr5:13379670-13501138
ENSDART00000076800	842.612	1077.97	1382.46	7318	9257.14	1101.01	8287.57	-2.93151	0.00178398	znhit1	GO:0003674 (molecular_function)	zinc finger, HIT-type containing 1 [Source:ZFIN;Acc:ZDB-GENE-050417-272]	chr5:40205334-40211864
ENSDART00000056386	26.4281	42.0856	13.9391	2843.57	3633.85	27.4843	3238.71	-7.01028	0.00180982		GO:0005515 (protein binding)	Uncharacterized protein [Source:UniProtKB/TrEMBL;Acc:E7F407]	chr24:39712860-39713332
ENSDART00000121107	103.602	132.097	98.2554	477.861	507.35	111.318	492.606	-2.15736	0.00181024			ncrna:rRNA chromosome:Zv9:24:29260480:29260594:1 gene:ENSDARG00000085707 gene_biotype:rRNA transcript_biotype:rRNA	chr24:29260480-29260594
ENSDART00000141984	12360	12652.9	4155.59	67.4418	37.0525	9722.82	52.2472	7.43693	0.0018134	srsf7a	GO:0008270 (zinc ion binding)	serine/arginine-rich splicing factor 7a [Source:ZFIN;Acc:ZDB-GENE-040426-1798]	chr5:38495708-38499307
ENSDART00000134493	12228.2	11504.9	3725.43	54.724	37.4569	9152.84	46.0904	7.47639	0.00182275	srsf7a	GO:0008270 (zinc ion binding)	serine/arginine-rich splicing factor 7a [Source:ZFIN;Acc:ZDB-GENE-040426-1798]	chr5:38495708-38499307
ENSDART00000141746	11.6532	4.54517	5.35439	3546.39	3284.1	7.18427	3415.24	-9.0208	0.00185227	aldh3a2a	GO:0016491 (oxidoreductase activity)	aldehyde dehydrogenase 3 family, member A2a [Source:ZFIN;Acc:ZDB-GENE-040718-74]	chr15:19792310-19801405
ENSDART00000058459	4.38698	3.86078	4.08657	1936.09	1642.94	4.11144	1789.52	-8.76283	0.00185724	rspo1	GO:0008201 (heparin binding)	R-spondin homolog (Xenopus laevis) [Source:ZFIN;Acc:ZDB-GENE-040718-44]	chr16:36087312-36131543
ENSDART00000086823	7091.07	15336.9	9719.92	29.9341	17.2957	10716	23.6149	8.80638	0.00185917	srpr	GO:0005047 (signal recognition particle binding)	signal recognition particle receptor (docking protein) [Source:ZFIN;Acc:ZDB-GENE-030219-11]	chr18:43242828-43264510
ENSDART00000133549	8500.48	12253.9	2318.37	2.82099	4.18502	7690.92	3.503	10.8237	0.00186084			cdna:known chromosome:Zv9:9:39210909:39213516:1 gene:ENSDARG00000040666 gene_biotype:protein_coding transcript_biotype:retained_intron	chr9:39210909-39213516
ENSDART00000109304	14670.5	9671.61	10756.5	3.41352	5.15009	11699.5	4.2818	11.4231	0.00186618	c20orf24		chromosome 20 open reading frame 24 [Source:HGNC Symbol;Acc:HGNC:15870]	chr23:2894249-2901300
ENSDART00000027066	5698.28	1091.91	4652.4	6.15219	3.0335	3814.2	4.59284	9.4732	0.00188761	klhl8	GO:0005515 (protein binding)	kelch-like 8 (Drosophila) [Source:ZFIN;Acc:ZDB-GENE-070209-226]	chr21:64250-117768
ENSDART00000078352	1029.51	2570.86	3053.97	26.5231	19.1769	2218.11	22.85	6.47551	0.0019071	tspan14	GO:0003674 (molecular_function)	tetraspanin 14 [Source:ZFIN;Acc:ZDB-GENE-060825-329]	chr13:21776875-21790616
ENSDART00000062385	2046.21	4313.65	3413.59	30.189	48.4962	3257.81	39.3426	6.34562	0.00197488	slc38a5a		solute carrier family 38, member 5a [Source:ZFIN;Acc:ZDB-GENE-081105-92]	chr8:26468724-26478746
ENSDART00000018895	5879.92	13592.8	4585.65	6.70516	7.2638	8019.47	6.98448	10.002	0.00197618	srrt	GO:0005654 (nucleoplasm)	serrate RNA effector molecule homolog (Arabidopsis) [Source:ZFIN;Acc:ZDB-GENE-020419-13]	chr5:4261225-4304755
ENSDART00000130537	25197	11778.7	4784.07	37.2361	21.754	13919.9	29.495	8.62537	0.00198971	spag1a	GO:0005515 (protein binding)	sperm associated antigen 1a [Source:ZFIN;Acc:ZDB-GENE-030131-9443]	chr19:12607661-12640568
ENSDART00000121745	422.875	384.465	273.27	2569.3	2321.12	360.203	2445.21	-2.78556	0.0020002	disc1		disrupted in schizophrenia 1 [Source:ZFIN;Acc:ZDB-GENE-090122-1]	chr13:50035365-50123165
ENSDART00000003495	25.6092	51.9333	15.2643	1706.47	2627.6	30.9356	2167.03	-6.27841	0.00200701		GO:0005515 (protein binding)	Uncharacterized protein [Source:UniProtKB/TrEMBL;Acc:E7F3L4]	chr24:41273511-41273986
ENSDART00000142481	4341.86	3451.32	8998.81	16.6732	30.5393	5597.33	23.6062	7.82816	0.00202719	rbb4l	GO:0005515 (protein binding)	retinoblastoma binding protein 4, like [Source:ZFIN;Acc:ZDB-GENE-030131-848]	chr11:12802549-12826559
ENSDART00000126501	4.96365	16.4843	13.6168	6730.32	3276.54	11.6883	5003.43	-8.82329	0.0020294	cnsta		consortin, connexin sorting protein a [Source:ZFIN;Acc:ZDB-GENE-120917-3]	chr17:11939217-12001155
ENSDART00000128453	30167.9	12851.1	44789.3	358.251	229.881	29269.4	294.066	6.49561	0.00203133	pycr1b	GO:0004735 (pyrroline-5-carboxylate reductase activity)	pyrroline-5-carboxylate reductase 1b [Source:ZFIN;Acc:ZDB-GENE-050522-26]	chr11:46091920-46098624
ENSDART00000153947	12.2666	8.01977	3.14092	741.208	1295.25	7.80911	1018.23	-7.17924	0.00203407	si:dkey-238d18.12	GO:0005515 (protein binding)	si:dkey-238d18.12 [Source:ZFIN;Acc:ZDB-GENE-131126-41]	chr15:36648967-36650144
ENSDART00000033380	2077.42	2679.52	6072.08	2.67528	2.73826	3609.67	2.70677	10.2223	0.00205538	zgc:92326	GO:0030246 (carbohydrate binding)	zgc:92326 [Source:ZFIN;Acc:ZDB-GENE-040718-159]	chr15:30351752-30365141
ENSDART00000125322	12036.9	9522.01	4897.8	87.9756	50.6783	8818.9	69.327	6.94888	0.00207282	rab1ba	GO:0005525 (GTP binding)	zRAB1B, member RAS oncogene family a [Source:ZFIN;Acc:ZDB-GENE-040426-873]	chr7:19347260-19362897
ENSDART00000028010	9.72906	9.35107	16.8118	372.845	342.74	11.964	357.793	-4.95542	0.00208009	unc119.2		unc-119 homolog 2 [Source:ZFIN;Acc:ZDB-GENE-030131-7635]	chr3:32731333-32756610
ENSDART00000024194	9.41684	5.35264	4.71789	588.543	961	6.49579	774.771	-6.92349	0.00208133	kif11	GO:0008017 (microtubule binding)	kinesin family member 11 [Source:ZFIN;Acc:ZDB-GENE-020426-1]	chr17:19311202-19327159
ENSDART00000073735	15930.3	13098.2	4461.39	2.91706	6.82138	11163.3	4.86922	11.096	0.00208756	rrad	GO:0000166 (nucleotide binding)	Ras-related associated with diabetes [Source:ZFIN;Acc:ZDB-GENE-030131-5607]	chr7:45948135-45951101
ENSDART00000104089	36.3315	48.7053	87.1227	1490.21	1142.15	57.3865	1316.18	-4.60471	0.00213112	enpp2	GO:0030247 (polysaccharide binding)	ectonucleotide pyrophosphatase/phosphodiesterase 2 [Source:ZFIN;Acc:ZDB-GENE-040426-1156]	chr16:11209096-11263579
ENSDART00000004379	1750.68	7778.82	4766.17	8.2949	3.6948	4765.22	5.99485	9.50369	0.00216183	nol10	GO:0005515 (protein binding)	nucleolar protein 10 [Source:ZFIN;Acc:ZDB-GENE-040426-764]	chr17:52208739-52247113
ENSDART00000138885	2596.62	12717.3	5361.11	3.48038	2.69641	6891.69	3.08839	10.8399	0.00218105	wdr33	GO:0005515 (protein binding)	WD repeat domain 33 [Source:ZFIN;Acc:ZDB-GENE-040924-3]	chr2:5052822-5086135
ENSDART00000144844	8779.96	2942.47	4761.01	11.9986	10.8301	5494.48	11.4143	8.76907	0.00218737			cdna:known chromosome:Zv9:1:47212313:47215420:-1 gene:ENSDARG00000052624 gene_biotype:protein_coding transcript_biotype:retained_intron	chr1:47212313-47215420
ENSDART00000120214	82.8416	88.6886	115.192	748.168	761.05	95.574	754.609	-2.99591	0.00219452			ncrna:rRNA chromosome:Zv9:18:15391505:15391621:1 gene:ENSDARG00000084814 gene_biotype:rRNA transcript_biotype:rRNA	chr18:15391505-15391621
ENSDART00000133073	5573	6235.43	4932.31	2150.32	2271.69	5580.25	2211	1.32958	0.00220809	rrbp1a	GO:0003674 (molecular_function)	ribosome binding protein 1 homolog a (dog) [Source:ZFIN;Acc:ZDB-GENE-030131-9795]	chr13:33836178-33863525
ENSDART00000098160	1853.88	1208.11	528.216	8.62147	4.54135	1196.73	6.58141	7.40109	0.00220895	tmem119b	GO:0003674 (molecular_function)	transmembrane protein 119b [Source:ZFIN;Acc:ZDB-GENE-070410-49]	chr5:33509664-33513260
ENSDART00000117509	3.6013	4.29269	3.82169	7.63908	8.35911	3.90522	7.99909	-1.03684	0.00222938			ncrna:snRNA chromosome:Zv9:9:42145863:42145978:-1 gene:ENSDARG00000083379 gene_biotype:snRNA transcript_biotype:snRNA	chr9:42145863-42145978
ENSDART00000133983	1938.68	4285.49	3766.09	40.9598	45.7978	3330.09	43.3788	6.18498	0.00223321	slc38a5a		solute carrier family 38, member 5a [Source:ZFIN;Acc:ZDB-GENE-081105-92]	chr8:26468724-26478746
ENSDART00000111491	198.498	245.417	214.353	489.425	545.303	219.423	517.364	-1.24096	0.00224614	wdr37	GO:0005515 (protein binding)	WD repeat domain 37 [Source:ZFIN;Acc:ZDB-GENE-030131-8101]	chr24:3556682-3605698
ENSDART00000077740	8447.63	6864.42	1581.46	7.82446	4.72185	5631.17	6.27315	9.5351	0.00224747	si:dkey-67c22.2		si:dkey-67c22.2 [Source:ZFIN;Acc:ZDB-GENE-030131-5845]	chr9:36885220-36895301
ENSDART00000076012	40.9679	37.9357	29.3257	9.66344	8.88376	36.0764	9.2736	1.94681	0.0022489	cybrd1		ddb1 and cul4 associated factor 17 [Source:ZFIN;Acc:ZDB-GENE-071008-1]	chr9:3484122-3516167
ENSDART00000142110	7685.88	13408.7	12469.9	23.3867	14.2586	11188.2	18.8227	9.21766	0.00225399			cdna:known chromosome:Zv9:6:33610521:33613215:-1 gene:ENSDARG00000039208 gene_biotype:protein_coding transcript_biotype:retained_intron	chr6:33610521-33613215
ENSDART00000123443	51.3362	13.7731	40.9095	9401.75	4772.26	35.3396	7087	-7.76957	0.00226298	daxx	GO:0016605 (PML body)	death-associated protein 6 [Source:ZFIN;Acc:ZDB-GENE-010110-3]	chr19:7636988-7656206
ENSDART00000132759	21203.5	20871	5546.44	14.1985	18.755	15873.6	16.4767	9.69109	0.00232131			cdna:novel chromosome:Zv9:17:25387822:25390832:1 gene:ENSDARG00000031782 gene_biotype:protein_coding transcript_biotype:retained_intron	chr17:25387822-25390832
ENSDART00000129638	2075.45	1208.35	7196.41	4.40121	2.69993	3493.4	3.55057	9.57162	0.00232276			cdna:known chromosome:Zv9:16:19296982:19302538:-1 gene:ENSDARG00000043304 gene_biotype:protein_coding transcript_biotype:retained_intron	chr16:19296982-19302538
ENSDART00000042928	3570.53	7656.67	3783.49	51.4424	85.4319	5003.56	68.4372	6.14585	0.00233663		GO:0005524 (ATP binding)	fucokinase [Source:HGNC Symbol;Acc:HGNC:29500]	chr25:7843268-7853447
ENSDART00000138313	10376.3	7451.26	5201.39	352.573	313.933	7676.33	333.253	4.47161	0.00234576	baz2a		bromodomain adjacent to zinc finger domain, 2A [Source:ZFIN;Acc:ZDB-GENE-041010-202]	chr23:6726652-6839166
ENSDART00000099259	1997.3	6254.82	2048.74	31.2271	22.1557	3433.62	26.6914	6.80787	0.0023719	dusp11	GO:0016787 (hydrolase activity)	dual specificity phosphatase 11 (RNA/RNP complex 1-interacting) [Source:ZFIN;Acc:ZDB-GENE-050417-226]	chr10:43499381-43512443
ENSDART00000151564	2295.95	2690.62	1842.13	19.9904	27.7662	2276.24	23.8783	6.57701	0.00238449	abi2b	GO:0005515 (protein binding)	abl-interactor 2b [Source:ZFIN;Acc:ZDB-GENE-060519-5]	chr6:9881387-9921002
ENSDART00000137619	60327.7	35893.5	19353.2	439.566	242.011	38524.8	340.789	6.73465	0.00239351			cdna:known chromosome:Zv9:10:25970342:25979365:-1 gene:ENSDARG00000008243 gene_biotype:protein_coding transcript_biotype:processed_transcript	chr10:25970342-25979365
ENSDART00000102421	11748.2	3421.37	6299.93	51.7206	92.2547	7156.51	71.9876	6.5171	0.00240717	mrpl16	GO:0003735 (structural constituent of ribosome)	mitochondrial ribosomal protein L16 [Source:ZFIN;Acc:ZDB-GENE-041122-1]	chr1:399085-405632
ENSDART00000108508	3147.44	1852.06	3624.52	51.9268	54.2618	2874.67	53.0943	5.70268	0.00242302	kdm5bb	GO:0005515 (protein binding)	lysine (K)-specific demethylase 5Bb [Source:ZFIN;Acc:ZDB-GENE-030424-1]	chr8:29159482-29195509
ENSDART00000091742	191.519	291.778	162.408	2429.12	1798.9	215.235	2114.01	-3.32504	0.00248492	btbd11b	GO:0005515 (protein binding)	BTB (POZ) domain containing 11b [Source:ZFIN;Acc:ZDB-GENE-050419-99]	chr18:14542235-14687263
ENSDART00000149173	3325.83	1894.75	4067.58	35.1639	36.7122	3096.05	35.938	6.35864	0.00249211	kdm5bb	GO:0005515 (protein binding)	lysine (K)-specific demethylase 5Bb [Source:ZFIN;Acc:ZDB-GENE-030424-1]	chr8:29159482-29195509
ENSDART00000131715	6006.21	8020.49	1202.05	6.89582	3.28885	5076.25	5.09233	9.66601	0.00250602	psmb4	GO:0008233 (peptidase activity)	proteasome (prosome, macropain) subunit, beta type, 4 [Source:ZFIN;Acc:ZDB-GENE-050417-333]	chr19:43977683-43983252
ENSDART00000103596	14667.4	11737.1	4438.14	7.57675	7.18022	10280.9	7.37849	10.2755	0.00253047	npc1	GO:0008158 (hedgehog receptor activity)	Niemann-Pick disease, type C1 [Source:ZFIN;Acc:ZDB-GENE-030131-3161]	chr2:4310671-4353828
ENSDART00000118094	9.44165	2.84344	6.33718	1494.84	1772.36	6.20742	1633.6	-8.19844	0.00254824			ncrna:miRNA chromosome:Zv9:10:34404993:34405116:-1 gene:ENSDARG00000082262 gene_biotype:miRNA transcript_biotype:miRNA	chr10:34404993-34405116
ENSDART00000153936	9.17884	4.80916	2.92609	1182.71	1012.89	5.63803	1097.8	-7.75838	0.00255415			cdna:known chromosome:Zv9:15:45682628:45685213:-1 gene:ENSDARG00000096990 gene_biotype:protein_coding transcript_biotype:retained_intron	chr15:45682628-45685213
ENSDART00000133512	14414.1	17816.3	2880.73	9.11455	17.1026	11703.7	13.1086	9.50062	0.00255851	fosl1b	GO:0043565 (sequence-specific DNA binding)	FOS-like antigen 1b [Source:ZFIN;Acc:ZDB-GENE-091204-259]	chr21:24994485-24998233
ENSDART00000007021	5816.7	15264.6	14523.2	53.0257	47.0915	11868.1	50.0586	7.76698	0.00258431	atp6v1ba	GO:0016820 (hydrolase activity, acting on acid anhydrides, catalyzing transmembrane movement of substances)	ATPase, H+ transporting, lysosomal, V1 subunit B, member a [Source:ZFIN;Acc:ZDB-GENE-030711-3]	chr17:21202306-21248355
ENSDART00000046678	6396.4	2559.4	9843.47	2.94661	2.7531	6266.42	2.84985	10.8998	0.00259326	pak2b	GO:0016740 (transferase activity)	p21 (CDKN1A)-activated kinase 2b [Source:ZFIN;Acc:ZDB-GENE-030131-3759]	chr22:2139917-2171800
ENSDART00000010543	2850.97	5128.25	1706.56	6.36696	6.14353	3228.59	6.25524	8.86795	0.00259515	ltv1		LTV1 homolog (S. cerevisiae) [Source:ZFIN;Acc:ZDB-GENE-040712-1]	chr1:54432431-54447381
ENSDART00000133602	33933.7	23449.5	29460.8	9163.93	7988.11	28948	8576.02	1.74204	0.00259787			cdna:known chromosome:Zv9:23:9901619:9914428:-1 gene:ENSDARG00000002659 gene_biotype:protein_coding transcript_biotype:retained_intron	chr23:9901619-9914428
ENSDART00000080958	3.03641	3.55866	2.88158	6.15688	6.66286	3.15888	6.40987	-1.02565	0.00259949	zgc:113279	GO:0005515 (protein binding)	zgc:113279 [Source:ZFIN;Acc:ZDB-GENE-050522-529]	chr15:16838036-16845832
ENSDART00000066471	24870.1	11334.9	8673.89	27.7017	27.7813	14959.6	27.7415	8.92372	0.00260103	adam8b	GO:0005515 (protein binding)	a disintegrin and metalloproteinase domain 8b [Source:ZFIN;Acc:ZDB-GENE-070808-1]	chr12:9850706-9886884
ENSDART00000151309	10.6149	2.97384	19.7416	3428.35	7613.12	11.1101	5520.73	-9.22428	0.00260755	ppt1	GO:0008474 (palmitoyl-(protein) hydrolase activity)	palmitoyl-protein thioesterase 1 (ceroid-lipofuscinosis, neuronal 1, infantile) [Source:ZFIN;Acc:ZDB-GENE-040426-2653]	chr19:44826028-44842899
ENSDART00000092073	6154.81	7392.16	2150.84	2.73124	2.85672	5232.61	2.79398	10.688	0.0026107	ubap2	GO:0005515 (protein binding)	ubiquitin associated protein 2 [Source:ZFIN;Acc:ZDB-GENE-070424-16]	chr21:10340797-10379322
ENSDART00000060205	16886	10748.4	2416.98	2.79805	4.37275	10017.1	3.5854	11.085	0.00264036	tufm	GO:0003746 (translation elongation factor activity)	Tu translation elongation factor, mitochondrial [Source:ZFIN;Acc:ZDB-GENE-050320-73]	chr3:108145-125608
ENSDART00000154192	15.3175	9.00216	6.70516	1057.52	1057.75	10.3416	1057.64	-6.76241	0.00264894	si:dkey-238d18.10		si:dkey-238d18.10 [Source:ZFIN;Acc:ZDB-GENE-030131-8063]	chr15:36664364-36706641
ENSDART00000081326	19218.7	2991.86	8267.53	22.107	12.6053	10159.4	17.3561	8.86891	0.00265595	prpf40a	GO:0005515 (protein binding)	PRP40 pre-mRNA processing factor 40 homolog A (yeast) [Source:ZFIN;Acc:ZDB-GENE-030131-274]	chr9:4681111-4727911
ENSDART00000127702	10322.5	3741.66	16947	4.23804	5.00719	10337.1	4.62261	10.8802	0.00266165	prpf6	GO:0005515 (protein binding)	PRP6 pre-mRNA processing factor 6 homolog (S. cerevisiae) [Source:ZFIN;Acc:ZDB-GENE-030131-2575]	chr23:7111964-7119387
ENSDART00000142718	3.08796	3.61994	2.88937	7.57268	6.80014	3.19909	7.18641	-1.17206	0.00266683	csf1rb	GO:0005515 (protein binding)	colony stimulating factor 1 receptor, b [Source:ZFIN;Acc:ZDB-GENE-091118-1]	chr21:42260372-42283206
ENSDART00000098706	8564.12	6317.59	8607.6	1181.31	1210.3	7829.77	1195.8	2.69655	0.00266691		GO:0005515 (protein binding)	laminin, gamma 2 [Source:HGNC Symbol;Acc:HGNC:6493]	chr2:35714224-35742453
ENSDART00000010992	1102.35	7400.34	2643.39	2.83887	4.65287	3715.36	3.74587	9.58092	0.00266933	nudc	GO:0003674 (molecular_function)	nuclear distribution gene C homolog [Source:ZFIN;Acc:ZDB-GENE-040426-899]	chr19:30610950-30615328
ENSDART00000123274	9670.37	11670.6	5390.55	327.301	492.032	8910.49	409.667	4.40018	0.0026727	papss1	GO:0004020 (adenylylsulfate kinase activity)	3'-phosphoadenosine 5'-phosphosulfate synthase 1 [Source:ZFIN;Acc:ZDB-GENE-080721-5]	chr1:50993336-51040923
ENSDART00000009184	1634.63	5251.57	1458.46	4.15518	5.17113	2781.55	4.66316	8.96847	0.00267613	hdac8	GO:0004407 (histone deacetylase activity)	histone deacetylase 8 [Source:ZFIN;Acc:ZDB-GENE-040426-2772]	chr7:53111279-53204522
ENSDART00000074547	7379.67	2913.63	3465.87	5.65646	2.76798	4586.39	4.21222	10.0546	0.00268259	bsdc1		BSD domain containing 1 [Source:ZFIN;Acc:ZDB-GENE-040905-1]	chr13:46547570-46567520
ENSDART00000140201	61715.5	64488.4	50415.2	14726.5	12410.7	58873	13568.6	2.11451	0.00269753			cdna:known chromosome:Zv9:10:25963452:25968113:-1 gene:ENSDARG00000008243 gene_biotype:protein_coding transcript_biotype:processed_transcript	chr10:25963452-25968113
ENSDART00000132850	21.0423	23.9565	10.0379	544.467	352.999	18.3456	448.733	-4.67446	0.00275497	stard10	GO:0008289 (lipid binding)	START domain containing 10 [Source:ZFIN;Acc:ZDB-GENE-040426-963]	chr14:34245373-34253070
ENSDART00000133247	403.854	269.378	318.951	5906.95	8007.85	330.728	6957.4	-4.39824	0.00281202	rusc2	GO:0005515 (protein binding)	RUN and SH3 domain containing 2 [Source:ZFIN;Acc:ZDB-GENE-060526-131]	chr5:21097902-21110890
ENSDART00000155150	511.68	1266.69	532.036	2.71735	2.76295	770.135	2.74015	7.99957	0.00281686	kif20ba		kinesin family member 20Ba [Source:ZFIN;Acc:ZDB-GENE-041111-213]	chr17:23300801-23339379
ENSDART00000133014	4633.86	9172.89	2233.74	2.89042	2.6842	5346.83	2.78731	10.6776	0.00283179			cdna:known chromosome:Zv9:23:33945130:33949596:-1 gene:ENSDARG00000092856 gene_biotype:protein_coding transcript_biotype:retained_intron	chr23:33945130-33949596
ENSDART00000139097	8.49765	9.37415	10.0893	23.5107	23.5737	9.32035	23.5422	-1.34034	0.00283626			cdna:putative chromosome:Zv9:10:37925733:37926595:-1 gene:ENSDARG00000043157 gene_biotype:protein_coding transcript_biotype:processed_transcript	chr10:37925733-37926595
ENSDART00000147668	3.75681	5.01287	5.44644	16.1892	19.3847	4.73871	17.787	-1.92009	0.00284977			havana:processed_transcript chromosome:Zv9:22:25480411:25481227:-1 gene:ENSDARG00000094960 gene_biotype:processed_transcript transcript_biotype:processed_transcript	chr22:25480411-25481227
ENSDART00000144922	34.6973	31.7042	96.8512	23963.1	21615.7	54.4176	22789.4	-8.90714	0.00285928			cdna:known chromosome:Zv9:20:34358749:34362358:1 gene:ENSDARG00000031100 gene_biotype:protein_coding transcript_biotype:retained_intron	chr20:34358749-34362358
ENSDART00000136975	35276.1	18648.9	21986.4	9.95097	17.7929	25303.8	13.8719	10.8385	0.0028905			cdna:known chromosome:Zv9:14:12401026:12405972:1 gene:ENSDARG00000003035 gene_biotype:protein_coding transcript_biotype:retained_intron	chr14:12401026-12405972
ENSDART00000122335	83081.9	78299.5	54992.8	12805.3	11797	72124.8	12301.1	2.53001	0.00291668	senp3b	GO:0008234 (cysteine-type peptidase activity)	eukaryotic translation initiation factor 4A, isoform 1A [Source:ZFIN;Acc:ZDB-GENE-031030-2]	chr7:27636641-27654442
ENSDART00000044270	3.06088	3.66156	2.88951	7.2327	8.16665	3.20398	7.69967	-1.26973	0.00292328	ttc21b	GO:0005515 (protein binding)	tetratricopeptide repeat domain 21B [Source:ZFIN;Acc:ZDB-GENE-031010-34]	chr9:51018004-51070132
ENSDART00000130549	7709.28	6309.84	1391.41	16.5582	8.78196	5136.84	12.6701	8.40069	0.00293342	si:dkey-67c22.2		si:dkey-67c22.2 [Source:ZFIN;Acc:ZDB-GENE-030131-5845]	chr9:36885220-36895301
ENSDART00000050006	2.83536	6.55629	5.18806	12666.9	6331.82	4.85991	9499.35	-10.9314	0.0029401	scd	GO:0004768 (stearoyl-CoA 9-desaturase activity)	stearoyl-CoA desaturase (delta-9-desaturase) [Source:ZFIN;Acc:ZDB-GENE-031106-3]	chr12:49684020-49699500
ENSDART00000106141	14556.5	11310.3	2580.91	9.95928	23.156	9482.55	16.5577	8.95145	0.00294999	tma7	GO:0003674 (molecular_function)	translational machinery associated 7 homolog (S. cerevisiae) [Source:ZFIN;Acc:ZDB-GENE-061027-176]	chr22:5587616-5593107
ENSDART00000149683	22291.2	14294.5	7815.76	64.0521	68.3923	14800.5	66.2222	7.67804	0.00296045	ptk7a	GO:0005515 (protein binding)	protein tyrosine kinase 7a [Source:ZFIN;Acc:ZDB-GENE-050522-216]	chr22:41304083-41369035
ENSDART00000105692	11338.9	12110.5	8954.16	12.703	17.9108	10801.2	15.3069	9.47218	0.0029616	mrpl54	GO:0030529 (ribonucleoprotein complex)	mitochondrial ribosomal protein L54 [Source:ZFIN;Acc:ZDB-GENE-050208-381]	chr22:15865507-15866507
ENSDART00000041114	6659.2	8093.36	2016.99	2.70925	3.04042	5589.85	2.87483	10.6995	0.00298336	psmb2	GO:0008233 (peptidase activity)	proteasome (prosome, macropain) subunit, beta type, 2 [Source:ZFIN;Acc:ZDB-GENE-040718-353]	chr19:49312244-49329959
ENSDART00000147803	13825.4	11721.6	3488	31.2468	43.3966	9678.32	37.3217	7.81079	0.00298941	srsf7a	GO:0003676 (nucleic acid binding)	serine/arginine-rich splicing factor 7a [Source:ZFIN;Acc:ZDB-GENE-040426-1798]	chr5:38495708-38499307
ENSDART00000147777	7803.38	2989.5	12598.3	3.1144	3.11806	7797.07	3.11623	11.059	0.00302969	ubfd1	GO:0005515 (protein binding)	ubiquitin family domain containing 1 [Source:ZFIN;Acc:ZDB-GENE-050506-90]	chr3:42654951-42669100
ENSDART00000042367	51.0044	17.5414	26.4384	7648.05	7404.29	31.6614	7526.17	-8.03424	0.00303524	zgc:63470		chromosome 11 open reading frame 68 [Source:HGNC Symbol;Acc:HGNC:28801]	chr7:719060-725509
ENSDART00000136301	12412	20490.3	4352.14	105.235	56.1123	12418.1	80.6738	7.07268	0.00305301	srsf7a	GO:0003676 (nucleic acid binding)	serine/arginine-rich splicing factor 7a [Source:ZFIN;Acc:ZDB-GENE-040426-1798]	chr5:38495708-38499307
ENSDART00000114271	85.9411	191.728	74.6703	2714.97	3533.03	117.447	3124	-4.85315	0.00306671		GO:0005515 (protein binding)	Uncharacterized protein [Source:UniProtKB/TrEMBL;Acc:E7EYK7]	chr2:36045319-36045832
ENSDART00000040033	6599.81	15891.8	1680.9	6.44742	3.29223	8057.49	4.86982	10.2492	0.00309159	nup107	GO:0005643 (nuclear pore)	nucleoporin 107 [Source:ZFIN;Acc:ZDB-GENE-041210-245]	chr4:21666485-21685243
ENSDART00000020327	10751.8	3042.2	5153.25	64.4706	87.6642	6315.75	76.0674	6.19924	0.00309502	mrpl16	GO:0003735 (structural constituent of ribosome)	mitochondrial ribosomal protein L16 [Source:ZFIN;Acc:ZDB-GENE-041122-1]	chr1:399085-405632
ENSDART00000033429	136.115	118.177	83.1798	494.066	576.417	112.491	535.241	-2.27588	0.00310942	npbwr2a	GO:0008188 (neuropeptide receptor activity)	neuropeptides B/W receptor 2a [Source:ZFIN;Acc:ZDB-GENE-091118-42]	chr23:31066538-31084495
ENSDART00000057285	10962.2	10805.5	1659.78	9.21528	4.81726	7809.18	7.01627	9.76938	0.00312886	nasp		nuclear autoantigenic sperm protein (histone-binding) [Source:ZFIN;Acc:ZDB-GENE-030131-5511]	chr6:33608799-33614433
ENSDART00000103365	656.55	1511.09	4775.08	5.72779	2.73844	2314.24	4.23312	8.72815	0.00313258	ociad1	GO:0003674 (molecular_function)	OCIA domain containing 1 [Source:ZFIN;Acc:ZDB-GENE-040426-1100]	chr20:23233133-23242389
ENSDART00000080536	29202.5	2541.74	10346	7.43564	3.3994	14030.1	5.41752	10.8309	0.00314078	hmga2	GO:0003677 (DNA binding)	high mobility group AT-hook 2 [Source:ZFIN;Acc:ZDB-GENE-030131-3148]	chr4:11883794-11926611
ENSDART00000110800	2.80979	2.87658	2.99855	6.76625	6.3678	2.89497	6.56702	-1.18155	0.00315032	si:dkey-83h2.2	GO:0004930 (G-protein coupled receptor activity)	si:dkey-83h2.2 [Source:ZFIN;Acc:ZDB-GENE-131127-405]	chr15:3883672-3885344
ENSDART00000089095	1977.24	2988.56	1457.48	2.88951	5.18127	2141.09	4.03539	9.04919	0.00315318	wdr74	GO:0005515 (protein binding)	WD repeat domain 74 [Source:ZFIN;Acc:ZDB-GENE-060929-1138]	chr10:27688135-27694479
ENSDART00000015479	19114.1	17782.3	5487.02	17.5139	15.5252	14127.8	16.5195	9.54395	0.00315472	psma8	GO:0008233 (peptidase activity)	proteasome (prosome, macropain) subunit, alpha type, 8 [Source:ZFIN;Acc:ZDB-GENE-040426-2194]	chr20:18352041-18359752
ENSDART00000122762	1151.08	1922.31	1583.14	109.088	110.316	1552.18	109.702	3.79123	0.0031851	naa50	GO:0008080 (N-acetyltransferase activity)	N(alpha)-acetyltransferase 50, NatE catalytic subunit [Source:ZFIN;Acc:ZDB-GENE-040801-142]	chr24:21783303-21792065
ENSDART00000143690	1171.73	1067.38	817.316	3416.74	4120.21	1018.81	3768.48	-1.89711	0.00318763	wnt16		cadherin-like and PC-esterase domain containing 1 [Source:ZFIN;Acc:ZDB-GENE-041210-247]	chr4:9681231-9779076
ENSDART00000114136	4935.17	17576.1	4937.15	60.2974	42.8791	9149.48	51.5882	7.21178	0.00319236	si:ch211-188i4.2	GO:0005515 (protein binding)	WD repeat domain 89 [Source:HGNC Symbol;Acc:HGNC:20489]	chr13:37866391-37872287
ENSDART00000122192	4.60804	3.9405	3.93484	9.8334	9.68469	4.16113	9.75904	-1.23375	0.00319332	ncaldb	GO:0046872 (metal ion binding)	neurocalcin delta b [Source:ZFIN;Acc:ZDB-GENE-040808-37]	chr19:12917572-12946640
ENSDART00000146394	10494.7	18637.3	17840.5	273.838	427.025	15657.5	350.432	5.47104	0.00322183	macf1	GO:0005515 (protein binding)	microtubule-actin crosslinking factor 1 [Source:ZFIN;Acc:ZDB-GENE-030131-3606]	chr19:36588262-36888387
ENSDART00000154136	31155.8	11332.8	41994.2	139.598	110.013	28160.9	124.806	7.63111	0.00323379			cdna:known_by_projection chromosome:Zv9:6:40503539:40504096:-1 gene:ENSDARG00000097797 gene_biotype:protein_coding transcript_biotype:retained_intron	chr6:40503539-40504096
ENSDART00000152481	9.46406	7.6584	8.26511	18.0164	16.2872	8.46252	17.1518	-1.02294	0.00324802			cdna:putative chromosome:Zv9:20:20744384:20767957:1 gene:ENSDARG00000021143 gene_biotype:protein_coding transcript_biotype:processed_transcript	chr20:20744384-20767957
ENSDART00000088610	1676.88	4775.08	1258.49	24.0645	36.9832	2570.15	30.5238	6.17797	0.00326383	rangap1a	GO:0005098 (Ran GTPase activator activity)	RAN GTPase activating protein 1a [Source:ZFIN;Acc:ZDB-GENE-060929-492]	chr3:5068675-5096804
ENSDART00000064726	3813.38	22173.6	48092.4	6.05681	2.99806	24693.1	4.52744	11.871	0.00327826	pnpla3	GO:0016787 (hydrolase activity)	patatin-like phospholipase domain containing 3 [Source:ZFIN;Acc:ZDB-GENE-040718-27]	chrZv9_scaffold3512:30685-45752
ENSDART00000099552	8490.07	1338.36	8154.77	12.1036	5.80293	5994.4	8.95324	9.07668	0.00329101	exosc8		exosome component 8 [Source:ZFIN;Acc:ZDB-GENE-030131-1736]	chr10:36026224-36034940
ENSDART00000110527	20295.1	19535.3	13237.6	36.256	56.4155	17689.4	46.3357	8.58592	0.00331707	ahsa1l	GO:0001671 (ATPase activator activity)	AHA1, activator of heat shock protein ATPase homolog 1, like [Source:ZFIN;Acc:ZDB-GENE-030131-664]	chr17:43896310-43910257
ENSDART00000101770	785.993	947.054	979.574	2874.45	3360.55	904.207	3117.5	-1.78788	0.0033335	etv5a	GO:0043565 (sequence-specific DNA binding)	ets variant 5a [Source:ZFIN;Acc:ZDB-GENE-030131-9572]	chr9:23665132-23682366
ENSDART00000133060	8346.84	12222.7	2381.47	2.69722	3.18463	7650.34	2.94092	11.056	0.00337512	nifk	GO:0003676 (nucleic acid binding)	nucleolar protein interacting with the FHA domain of MKI67 [Source:ZFIN;Acc:ZDB-GENE-021231-4]	chr9:39210879-39214404
ENSDART00000142988	4463.19	1192.52	919.728	7.2167	14.4743	2191.81	10.8455	7.37619	0.00339842	aldh18a1	GO:0016740 (transferase activity)	aldehyde dehydrogenase 18 family, member A1 [Source:ZFIN;Acc:ZDB-GENE-030131-5602]	chr12:32453033-32496034
ENSDART00000144589	1905.88	5208.76	1705.99	21.7269	18.0569	2940.21	19.8919	7.01851	0.00344059			cdna:known chromosome:Zv9:10:36008056:36015852:-1 gene:ENSDARG00000061235 gene_biotype:protein_coding transcript_biotype:processed_transcript	chr10:36008056-36015852
ENSDART00000143455	3428.35	1756.84	1214.18	74.3299	57.3908	2133.12	65.8603	4.8933	0.00346329	sf1	GO:0003723 (RNA binding)	splicing factor 1 [Source:ZFIN;Acc:ZDB-GENE-030131-2492]	chr7:23976996-23987907
ENSDART00000008365	5749.06	1787.95	6903.45	3.90274	3.65127	4813.49	3.77701	10.099	0.00346704	ncbp2	GO:0000340 (RNA 7-methylguanosine cap binding)	nuclear cap binding protein subunit 2 [Source:ZFIN;Acc:ZDB-GENE-020419-31]	chr22:41975987-41980251
ENSDART00000143139	2.85741	25.2598	4.92065	16790.7	9962.9	11.0126	13376.8	-10.8348	0.00347693	ufd1l	GO:0006511 (ubiquitin-dependent protein catabolic process)	ubiquitin fusion degradation 1-like [Source:ZFIN;Acc:ZDB-GENE-040718-150]	chr8:4969785-4984936
ENSDART00000019706	2026.35	6780.9	5912.11	35.3056	45.8387	4906.45	40.5722	6.7503	0.00348041	phc2b	GO:0005515 (protein binding)	polyhomeotic-like 2b [Source:ZFIN;Acc:ZDB-GENE-040426-1113]	chr6:48095543-48139865
ENSDART00000147262	408.545	195.165	202.896	4235.65	3481.76	268.869	3858.7	-3.92448	0.00348891			havana:processed_transcript chromosome:Zv9:18:28933756:28935947:1 gene:ENSDARG00000095317 gene_biotype:processed_transcript transcript_biotype:processed_transcript	chr18:28933756-28935947
ENSDART00000145177	14988.5	5313.19	13185.4	233.293	184.432	11162.3	208.863	5.61472	0.00352401	exosc5		exosome component 5 [Source:ZFIN;Acc:ZDB-GENE-060503-675]	chr18:34400131-34405923
ENSDART00000153960	41943.7	19916.2	35913.4	30.0151	57.0825	32591.1	43.5488	9.55205	0.00353574	pfdn4	GO:0051082 (unfolded protein binding)	prefoldin subunit 4 [Source:ZFIN;Acc:ZDB-GENE-100922-122]	chr23:38244618-38253249
GENSCAN00000021880	1245.55	3221.43	540.415	4.08782	6.5802	1669.13	5.33401	7.96326	0.00355621			cdna:genscan chromosome:Zv9:22:35558966:35672308:1 transcript_biotype:protein_coding	chr22:35558966-35672308
ENSDART00000141332	101.615	81.7667	90.8077	266.581	308.491	91.3966	287.536	-1.65537	0.00357193	slc43a2b	GO:0016021 (integral component of membrane)	solute carrier family 43, member 2b [Source:ZFIN;Acc:ZDB-GENE-041212-6]	chr10:24803925-24822912
ENSDART00000152745	826.206	3402.93	2356.64	2.93877	6.93866	2195.26	4.93872	8.70021	0.00358403	snrpb2	GO:0017069 (snRNA binding)	small nuclear ribonucleoprotein polypeptide B2 [Source:ZFIN;Acc:ZDB-GENE-060616-2]	chr1:52196039-52204292
ENSDART00000114343	8296.26	3415.98	5620.65	21.1412	39.6578	5777.63	30.3995	7.54852	0.00358404	brd4	GO:0070577 (lysine-acetylated histone binding)	bromodomain containing 4 [Source:ZFIN;Acc:ZDB-GENE-030131-267]	chr3:53754194-53869362
ENSDART00000054208	5515.69	1329.87	9987.79	7.14364	13.967	5611.12	10.5553	8.71048	0.00359143	mtap	GO:0017061 (S-methyl-5-thioadenosine phosphorylase activity)	methylthioadenosine phosphorylase [Source:ZFIN;Acc:ZDB-GENE-040426-1505]	chr1:24993612-25010525
ENSDART00000141510	652.875	1579.24	5361.78	5.73735	2.6676	2531.3	4.20248	8.82009	0.00359326	ociad1	GO:0003674 (molecular_function)	OCIA domain containing 1 [Source:ZFIN;Acc:ZDB-GENE-040426-1100]	chr20:23233133-23242389
ENSDART00000079091	4.03093	6.75898	4.3347	488.796	312.789	5.04153	400.793	-6.31645	0.00360367	cyp2r1	GO:0004497 (monooxygenase activity)	cytochrome P450, family 2, subfamily R, polypeptide 1 [Source:ZFIN;Acc:ZDB-GENE-110114-1]	chr7:28581189-28823102
ENSDART00000064439	6343.88	11642.4	21277.6	148.006	187.075	13088	167.541	6.1266	0.00361888	nup43	GO:0005515 (protein binding)	nucleoporin 43 [Source:ZFIN;Acc:ZDB-GENE-040426-2533]	chr20:1339804-1351168
ENSDART00000147862	6106.75	12516.7	2824.19	108.065	62.4377	7149.2	85.2514	6.19041	0.00363828			cdna:known chromosome:Zv9:23:34350916:34354824:1 gene:ENSDARG00000008237 gene_biotype:protein_coding transcript_biotype:retained_intron	chr23:34350916-34354824
ENSDART00000052789	2703.66	4304.76	2677.05	7.19322	4.3478	3228.49	5.77051	9.13615	0.00364574	c1galt1c1		C1GALT1-specific chaperone 1 [Source:ZFIN;Acc:ZDB-GENE-030131-2772]	chr14:34490501-34496057
ENSDART00000135322	3.76962	3.89652	2.96965	10.5763	9.07701	3.54526	9.82665	-1.47686	0.00365379	ccdc102a		coiled-coil domain containing 102A [Source:ZFIN;Acc:ZDB-GENE-030131-4044]	chr7:30061203-30173826
ENSDART00000065877	4662.82	6075.58	2521.45	138.471	222.319	4419.95	180.395	4.56365	0.00369675	cstf1	GO:0005515 (protein binding)	cleavage stimulation factor, 3' pre-RNA, subunit 1 [Source:ZFIN;Acc:ZDB-GENE-030131-2958]	chr11:28694916-28704368
ENSDART00000111240	6.355	17.953	32.9917	4165.84	2849.01	19.0999	3507.42	-7.79096	0.00369692	mhc2dab	GO:0005515 (protein binding)	major histocompatibility complex class II DAB gene [Source:ZFIN;Acc:ZDB-GENE-980526-200]	chr8:37546100-37548453
ENSDART00000134912	15.1897	15.5574	20.7292	49.5621	43.1743	17.1587	46.3682	-1.44559	0.00373111	tox		thymocyte selection-associated high mobility group box [Source:ZFIN;Acc:ZDB-GENE-070912-181]	chr2:21779436-21901778
ENSDART00000024858	4662.39	9530.99	6446.21	87.4631	144.756	6879.86	116.11	5.87246	0.00377501	chchd10		coiled-coil-helix-coiled-coil-helix domain containing 10 [Source:ZFIN;Acc:ZDB-GENE-040426-1753]	chr21:13907624-13911694
ENSDART00000122599	147.977	103.172	138.524	395.663	475.492	129.891	435.578	-1.75666	0.00380355		GO:0005488 (binding)	WD repeat domain 52 [Source:HGNC Symbol;Acc:HGNC:25631]	chr19:50245572-50250398
ENSDART00000061470	74.3299	30.5069	57.4956	2473.95	2256.38	54.1108	2365.16	-5.54209	0.00382808	mtss1l	GO:0008093 (cytoskeletal adaptor activity)	metastasis suppressor 1-like [Source:ZFIN;Acc:ZDB-GENE-030219-89]	chr18:14356378-14422953
ENSDART00000122536	4331.97	2831.93	977.426	2.7474	3.1048	2713.78	2.9261	9.61412	0.00382983	cd3eap		CD3e molecule, epsilon associated protein [Source:ZFIN;Acc:ZDB-GENE-101202-2]	chr15:28135771-28151144
ENSDART00000149828	8533	4081.35	3424.66	37.2736	69.5645	5346.34	53.419	6.59496	0.00383095	ccnd1	GO:0019901 (protein kinase binding)	cyclin D1 [Source:ZFIN;Acc:ZDB-GENE-980526-176]	chr7:54575139-54584679
ENSDART00000078557	796.913	7332.96	2057.52	2.82797	5.71129	3395.8	4.26963	9.15493	0.0038703	polr2gl	GO:0003899 (DNA-directed RNA polymerase activity)	polymerase (RNA) II (DNA directed) polypeptide G-like [Source:ZFIN;Acc:ZDB-GENE-030131-2808]	chr14:27724742-27728151
ENSDART00000066556	1358.34	8391.57	1072.39	6.10502	2.67163	3607.43	4.38833	9.15579	0.00387317			chromosome 7 open reading frame 50 [Source:HGNC Symbol;Acc:HGNC:22421]	chr24:39203273-39211648
ENSDART00000086954	888.594	8679.07	3720.17	6.90529	2.79248	4429.28	4.84888	9.44533	0.00389797	sesn3	GO:0003674 (molecular_function)	sestrin 3 [Source:ZFIN;Acc:ZDB-GENE-040426-2924]	chr15:34339262-34388990
ENSDART00000142575	4187.21	3089.13	1557.54	2.86392	6.09777	2944.63	4.48084	9.3468	0.00389812	tceb1b	GO:0005575 (cellular_component)	transcription elongation factor B (SIII), polypeptide 1b [Source:ZFIN;Acc:ZDB-GENE-040718-138]	chr2:29960685-29964617
ENSDART00000121809	19.0548	20.7657	16.0174	50.6562	48.6709	18.6126	49.6635	-1.4239	0.00390643	gnas	GO:0031683 (G-protein beta/gamma-subunit complex binding)	GNAS complex locus [Source:ZFIN;Acc:ZDB-GENE-090417-2]	chr6:49763497-49824686
GENSCAN00000028250	134.035	103.991	86.5438	21.2686	22.9049	108.19	22.0867	2.26993	0.0039229			cdna:genscan chromosome:Zv9:13:5131297:5244122:-1 transcript_biotype:protein_coding	chr13:5131297-5244122
ENSDART00000057325	144.817	59.8993	53.3975	1984.17	1353.5	86.038	1668.83	-4.40465	0.00394798	si:ch211-152n14.6	GO:0016020 (membrane)	calcium channel, voltage-dependent, gamma subunit 4 [Source:HGNC Symbol;Acc:HGNC:1408]	chr6:23200427-23205869
ENSDART00000140592	1333.82	4158.75	1084.83	2.69511	2.86352	2192.47	2.77932	9.35478	0.00396901			cdna:known chromosome:Zv9:2:24725508:24726314:-1 gene:ENSDARG00000026053 gene_biotype:protein_coding transcript_biotype:retained_intron	chr2:24725508-24726314
ENSDART00000126910	14.0135	14.6039	11.737	27.8124	29.2034	13.4515	28.5079	-1.08952	0.00399851	si:dkeyp-69c1.7		si:dkeyp-69c1.7 [Source:ZFIN;Acc:ZDB-GENE-091204-69]	chr21:21745279-21749469
ENSDART00000153777	900.303	2555.74	599.467	2.72755	3.25312	1351.84	2.99034	8.54573	0.00401345	si:ch73-242m19.1		si:ch73-242m19.1 [Source:ZFIN;Acc:ZDB-GENE-131121-474]	chr17:6592384-6695895
ENSDART00000131470	62.4525	44.9615	48.909	166.395	176.487	52.1077	171.441	-1.73183	0.00401401			cdna:known chromosome:Zv9:9:34768233:34794257:1 gene:ENSDARG00000061759 gene_biotype:protein_coding transcript_biotype:processed_transcript	chr9:34768233-34794257
ENSDART00000137447	11762.3	17261.2	3552.82	17.3525	22.1339	10858.8	19.7432	8.838	0.00401488	nasp	GO:0005515 (protein binding)	nuclear autoantigenic sperm protein (histone-binding) [Source:ZFIN;Acc:ZDB-GENE-030131-5511]	chr6:33608799-33614433
ENSDART00000020749	12318.7	2843.57	3078.99	2.7166	2.75177	6080.41	2.73419	10.7657	0.00403849	hars	GO:0004821 (histidine-tRNA ligase activity)	histidyl-tRNA synthetase [Source:ZFIN;Acc:ZDB-GENE-040912-152]	chr14:7345664-7364109
ENSDART00000060919	22638.7	2461.11	10930.9	2.7393	4.08958	12010.2	3.41444	11.3064	0.00405864	qars	GO:0004819 (glutamine-tRNA ligase activity)	glutaminyl-tRNA synthetase [Source:ZFIN;Acc:ZDB-GENE-040426-1011]	chr8:48507066-48539923
ENSDART00000109325	21.6022	34.4345	23.7392	1157.59	782.206	26.592	969.897	-5.19146	0.00407882			Uncharacterized protein [Source:UniProtKB/TrEMBL;Acc:F1RDV1]	chr12:47019879-47031879
ENSDART00000131628	365.569	526.426	988.131	9719.92	12669.1	626.709	11194.5	-4.27033	0.00409083			cdna:known chromosome:Zv9:1:24336167:24343819:-1 gene:ENSDARG00000070055 gene_biotype:protein_coding transcript_biotype:retained_intron	chr1:24336167-24343819
ENSDART00000156740	7.75129	6.2819	8.42734	3.24722	2.83254	7.48684	3.03988	1.29292	0.00410117	rhoh	GO:0005525 (GTP binding)	ras homolog gene family, member H [Source:ZFIN;Acc:ZDB-GENE-060228-7]	chr1:22172499-22173086
ENSDART00000122815	30.2046	10.7056	26.658	9519.53	4409.78	22.5227	6964.65	-8.30375	0.00412169	daxx		death-associated protein 6 [Source:ZFIN;Acc:ZDB-GENE-010110-3]	chr19:7636988-7656206
ENSDART00000131303	14883	14034.8	4999.62	87.1544	102.251	11305.8	94.7025	6.74783	0.00412211			cdna:known chromosome:Zv9:5:38495872:38497665:1 gene:ENSDARG00000035325 gene_biotype:protein_coding transcript_biotype:retained_intron	chr5:38495872-38497665
GENSCAN00000008198	3927.31	5997.09	4118.43	18868	16677.9	4680.94	17773	-1.9489	0.00416169			cdna:genscan chromosome:Zv9:6:20518707:20519060:1 transcript_biotype:protein_coding	chr6:20518707-20519060
ENSDART00000091169	1760.28	4361.9	5160.12	20.5499	21.2811	3760.77	20.9155	7.3489	0.00418796	abcb7	GO:0016887 (ATPase activity)	ATP-binding cassette, sub-family B (MDR/TAP), member 7 [Source:ZFIN;Acc:ZDB-GENE-050517-10]	chr14:11180332-11268778
ENSDART00000085164	19031.3	1996.01	2403.79	2.85776	7.38215	7810.37	5.11995	9.93723	0.00419443	elp6	GO:0003674 (molecular_function)	elongator acetyltransferase complex subunit 6 [Source:ZFIN;Acc:ZDB-GENE-060825-249]	chr16:41015872-41021197
ENSDART00000141350	3.08928	3.7802	2.89882	7.49703	6.96157	3.2561	7.2293	-1.15913	0.00419643			cdna:known chromosome:Zv9:5:23643026:23643671:-1 gene:ENSDARG00000012776 gene_biotype:protein_coding transcript_biotype:retained_intron	chr5:23643026-23643671
ENSDART00000138050	276.723	206.874	208.505	601.403	533.014	230.701	567.209	-1.30883	0.00420753	si:dkey-265a7.2		RNA binding motif protein 33 [Source:HGNC Symbol;Acc:HGNC:27223]	chr2:29710422-29762469
GENSCAN00000028914	20767.6	9066.86	8788.78	229.142	253.141	12874.4	241.141	5.61801	0.00421059			cdna:genscan scaffold:Zv9:Zv9_NA942:3735:13789:-1 transcript_biotype:protein_coding
ENSDART00000141471	11858.8	2696.85	2974.11	3.47376	3.77771	5843.25	3.62573	10.2993	0.00421752	hars	GO:0004821 (histidine-tRNA ligase activity)	histidyl-tRNA synthetase [Source:ZFIN;Acc:ZDB-GENE-040912-152]	chr14:7345664-7364109
ENSDART00000062220	90.5119	88.463	40.3627	2662.17	2404.61	73.1125	2533.39	-5.20432	0.00422094	gstt1a	GO:0005515 (protein binding)	glutathione S-transferase theta 1a [Source:ZFIN;Acc:ZDB-GENE-031001-13]	chr8:31635153-31639308
ENSDART00000150142	28.0104	31.1981	19.6816	136.885	125.496	26.2967	131.19	-2.34414	0.00425504			cdna:known chromosome:Zv9:16:5651569:5652396:1 gene:ENSDARG00000032326 gene_biotype:protein_coding transcript_biotype:retained_intron	chr16:5651569-5652396
ENSDART00000150726	15.2908	2.83521	17.6171	21552.7	16686.5	11.9144	19119.6	-11.0187	0.00433436			havana:lincRNA chromosome:Zv9:25:27075830:27077735:1 gene:ENSDARG00000096066 gene_biotype:lincRNA transcript_biotype:lincRNA	chr25:27075830-27077735
ENSDART00000022155	51.215	37.7888	32.6064	182.421	166.315	40.5367	174.368	-2.12929	0.00433546	v2rh9	GO:0004871 (signal transducer activity)	vomeronasal 2 receptor, h9 [Source:ZFIN;Acc:ZDB-GENE-050419-176]	chr18:31696158-31702127
ENSDART00000129167	38456.4	25000.6	30412.5	9022.35	8130.13	31289.8	8576.24	1.84682	0.00435296	mapre1b	GO:0005515 (protein binding)	microtubule-associated protein, RP/EB family, member 1b [Source:ZFIN;Acc:ZDB-GENE-040426-2256]	chr23:9901568-9914536
ENSDART00000141483	11110.7	15798.7	2778.83	16.7505	12.3396	9896.08	14.5451	9.0968	0.0043785			cdna:known chromosome:Zv9:6:33609834:33614305:-1 gene:ENSDARG00000039208 gene_biotype:protein_coding transcript_biotype:processed_transcript	chr6:33609834-33614305
ENSDART00000127580	2513.11	5195.14	17842.9	7.21869	10.3644	8517.04	8.79154	9.47444	0.00438165			cytoplasmic polyadenylation element binding protein 4 [Source:HGNC Symbol;Acc:HGNC:21747]	chr21:40224198-40230696
ENSDART00000129498	30.8444	11.1837	55.2103	2979.15	1588.15	32.4128	2283.65	-6.34787	0.00438379	mef2d	GO:0000976 (transcription regulatory region sequence-specific DNA binding)	myocyte enhancer factor 2d [Source:ZFIN;Acc:ZDB-GENE-990415-164]	chr16:31301062-31422705
ENSDART00000144318	22966.3	30524.8	13553.4	2.81153	6.0138	22348.2	4.41267	12.3306	0.00438812	kal1b	GO:0005515 (protein binding)	Kallmann syndrome 1b sequence [Source:ZFIN;Acc:ZDB-GENE-000201-13]	chr22:41869267-41959136
ENSDART00000060145	9.56378	12.6053	61.5783	3215.88	6225.12	27.9158	4720.5	-7.84148	0.00439894	pafah1b3	GO:0016787 (hydrolase activity)	platelet-activating factor acetylhydrolase, isoform Ib, gamma subunit [Source:ZFIN;Acc:ZDB-GENE-040426-1026]	chr16:13510926-13529668
ENSDART00000153427	695.112	1545.9	5305.56	2.83854	4.51214	2515.53	3.67534	8.9634	0.00439917			cdna:putative chromosome:Zv9:20:23233152:23236152:-1 gene:ENSDARG00000052334 gene_biotype:protein_coding transcript_biotype:processed_transcript	chr20:23233152-23236152
ENSDART00000125430	21497.8	8369.21	13195.1	3.9597	8.80206	14354	6.38088	11.1419	0.00445634	pprc1	GO:0000166 (nucleotide binding)	peroxisome proliferator-activated receptor gamma, coactivator-related 1 [Source:ZFIN;Acc:ZDB-GENE-030131-9858]	chr13:11761998-11775438
ENSDART00000146914	3406.71	22333.5	2132.77	5.62317	3.02835	9291	4.32576	10.3682	0.00452191	mpp6a	GO:0005515 (protein binding)	membrane protein, palmitoylated 6a (MAGUK p55 subfamily member 6) [Source:ZFIN;Acc:ZDB-GENE-050506-35]	chr16:23526792-23573992
ENSDART00000076974	25949.3	15246.9	3798.59	10.2663	7.83025	14998.3	9.04828	10.3192	0.00452289	gfpt2	GO:0004360 (glutamine-fructose-6-phosphate transaminase (isomerizing) activity)	glutamine-fructose-6-phosphate transaminase 2 [Source:ZFIN;Acc:ZDB-GENE-071113-1]	chr21:31157979-31203951
ENSDART00000138641	6.66052	21.4061	11.5315	5559.52	2504.57	13.1994	4032.05	-8.30451	0.0045233	si:dkey-235d18.5	GO:0005515 (protein binding)	si:dkey-235d18.5 [Source:ZFIN;Acc:ZDB-GENE-041014-243]	chr20:52926069-53067233
ENSDART00000153218	2337.69	1876.45	1798.9	7047.62	5910.19	2004.35	6478.91	-1.69677	0.00453124	oxld1		oxidoreductase-like domain containing 1 [Source:ZFIN;Acc:ZDB-GENE-130603-23]	chr12:37662491-37667045
ENSDART00000141507	6110.31	17222.9	15116.3	45.5113	20.5243	12816.5	33.0178	8.57725	0.00454091			cdna:novel chromosome:Zv9:12:11242727:11246563:1 gene:ENSDARG00000015315 gene_biotype:protein_coding transcript_biotype:retained_intron	chr12:11242727-11246563
ENSDART00000018523	21238.7	22880.7	14687.9	1501.75	2083.85	19602.4	1792.8	3.44413	0.00454182	ahcy	GO:0016787 (hydrolase activity)	S-adenosylhomocysteine hydrolase [Source:ZFIN;Acc:ZDB-GENE-031219-6]	chr6:49877781-49917954
ENSDART00000058913	83346.1	72629.1	55086.6	12410.7	12108	70353.9	12259.3	2.50002	0.00456208	senp3b	GO:0016787 (hydrolase activity)	eukaryotic translation initiation factor 4A, isoform 1A [Source:ZFIN;Acc:ZDB-GENE-031030-2]	chr7:27636641-27654442
ENSDART00000149057	16012.4	10286.6	15493.8	3354.54	2993.67	13930.9	3174.11	2.10846	0.00457215	kpnb1	GO:0005488 (binding)	karyopherin (importin) beta 1 [Source:ZFIN;Acc:ZDB-GENE-030131-2579]	chr19:49796246-49809511
ENSDART00000005485	679.553	3740.26	2865.06	10.662	19.2195	2428.29	14.9408	7.08112	0.00457397	zgc:136902	GO:0005198 (structural molecule activity)	zgc:136902 [Source:ZFIN;Acc:ZDB-GENE-060421-4592]	chr11:11575926-11579586
GENSCAN00000014138	31.2168	5.54724	10.936	5341.97	4039.67	15.9	4690.82	-8.55258	0.00458272			cdna:genscan scaffold:Zv9:Zv9_NA466:29261:162566:-1 transcript_biotype:protein_coding
ENSDART00000143210	6904.94	1589.4	2014.57	34.367	15.8182	3502.97	25.0926	6.91141	0.00458846	srgn		serglycin [Source:ZFIN;Acc:ZDB-GENE-030131-7127]	chr13:23210793-23214666
ENSDART00000152890	24468.1	24152.3	38756.3	43.9585	25.684	29125.6	34.8212	9.72311	0.0045919			cdna:known chromosome:Zv9:20:36700175:36703830:-1 gene:ENSDARG00000042864 gene_biotype:protein_coding transcript_biotype:retained_intron	chr20:36700175-36703830
ENSDART00000121847	4187.63	5048.76	1985.91	114.797	191.486	3740.77	153.142	4.55105	0.00459268	cstf1	GO:0005515 (protein binding)	cleavage stimulation factor, 3' pre-RNA, subunit 1 [Source:ZFIN;Acc:ZDB-GENE-030131-2958]	chr11:28694916-28704368
ENSDART00000062591	63.5939	94.1095	71.4514	279.99	229.992	76.385	254.991	-1.75201	0.00459975	c1orf27	GO:0016491 (oxidoreductase activity)	chromosome 1 open reading frame 27 [Source:HGNC Symbol;Acc:HGNC:24299]	chr2:20662898-20675820
ENSDART00000132680	10400.1	11241.3	5258.19	1073.59	780.877	8966.52	927.232	3.21514	0.00460435			cdna:known chromosome:Zv9:8:23143613:23146535:-1 gene:ENSDARG00000074758 gene_biotype:protein_coding transcript_biotype:processed_transcript	chr8:23143613-23146535
ENSDART00000141170	6.25021	2.79168	2.71863	119.362	132.788	3.92017	126.075	-5.12011	0.00460688	stam	GO:0005515 (protein binding)	signal transducing adaptor molecule (SH3 domain and ITAM motif) 1 [Source:ZFIN;Acc:ZDB-GENE-031118-123]	chr2:31153269-31168328
ENSDART00000052539	1811.52	8188.31	8772.24	2.6989	2.73886	6257.36	2.71888	10.864	0.00463265	myo1ea	GO:0005515 (protein binding)	myosin IE, a [Source:ZFIN;Acc:ZDB-GENE-030131-5127]	chr7:31968738-32059207
ENSDART00000155881	2.9506	3.42396	2.87075	6.9685	7.90756	3.08177	7.43803	-1.27267	0.00463819	xirp2c		xin actin-binding repeat containing 2c [Source:ZFIN;Acc:ZDB-GENE-100910-1]	chr24:20435541-20461430
ENSDART00000140462	5764.53	7671.9	8270.11	18732.3	21055.6	7235.51	19893.9	-1.47356	0.00464751			havana:processed_transcript chromosome:Zv9:5:57665372:57667350:1 gene:ENSDARG00000093252 gene_biotype:processed_transcript transcript_biotype:processed_transcript	chr5:57665372-57667350
ENSDART00000150300	52479.9	66365.3	56696.8	21203.5	18106.9	58514	19655.2	1.5714	0.00465888	oaz1b		ornithine decarboxylase antizyme 1b [Source:ZFIN;Acc:ZDB-GENE-020731-5]	chr21:820942-832531
ENSDART00000122352	3213.58	9061.83	11116	48.0494	56.4077	7797.14	52.2286	7.04317	0.00467313	p4ha2	GO:0005515 (protein binding)	procollagen-proline, 2-oxoglutarate 4-dioxygenase (proline 4-hydroxylase), alpha polypeptide 2 [Source:ZFIN;Acc:ZDB-GENE-030827-1]	chr21:41503345-41537355
ENSDART00000026383	2372.8	1160.01	9870.37	6.56617	13.3824	4467.73	9.97428	8.32507	0.00467879	sigmar1		sigma non-opioid intracellular receptor 1 [Source:ZFIN;Acc:ZDB-GENE-040426-1006]	chr10:14452415-14458029
ENSDART00000033394	24330.4	3297.46	10354.9	3.05761	2.6992	12660.9	2.8784	11.6761	0.00468893	pfkpa	GO:0003872 (6-phosphofructokinase activity)	phosphofructokinase, platelet a [Source:ZFIN;Acc:ZDB-GENE-091112-22]	chr24:4041501-4081772
ENSDART00000143360	471.072	692.042	422.978	3193.16	2954.39	528.698	3073.78	-2.57172	0.00469589	si:dkey-78l4.12	GO:0004252 (serine-type endopeptidase activity)		chr22:19835531-19837118
ENSDART00000124612	16.7447	7.20356	5.46071	1126.31	1154.79	9.80298	1140.55	-7.03426	0.00469606	si:dkey-238d18.10		si:dkey-238d18.10 [Source:ZFIN;Acc:ZDB-GENE-030131-8063]	chr15:36664364-36706641
ENSDART00000048753	15516.5	12468	3038.29	11.5034	9.56591	10341	10.5346	9.64123	0.00469771	ddx18	GO:0016787 (hydrolase activity)	DEAD (Asp-Glu-Ala-Asp) box polypeptide 18 [Source:ZFIN;Acc:ZDB-GENE-030131-9685]	chr9:39366775-39404529
ENSDART00000060157	1151.35	1530.08	2667.66	2.80591	5.60073	1783.03	4.20332	8.72291	0.00472863	zgc:92326	GO:0030246 (carbohydrate binding)	zgc:92326 [Source:ZFIN;Acc:ZDB-GENE-040718-159]	chr15:30351752-30365141
ENSDART00000030687	9444.73	8395.63	9113.57	74.4071	61.6101	8984.64	68.0086	7.05027	0.00478356	bcl7ba	GO:0003674 (molecular_function)	B-cell CLL/lymphoma 7B, a [Source:ZFIN;Acc:ZDB-GENE-040426-2193]	chr10:34198947-34279922
ENSDART00000064066	1856.68	6463.96	6517.31	23.2806	28.1799	4945.98	25.7303	7.38343	0.0047947	bcas2	GO:0003674 (molecular_function)	breast carcinoma amplified sequence 2 [Source:ZFIN;Acc:ZDB-GENE-030408-5]	chr8:11690063-11698066
GENSCAN00000033026	147.188	328.27	261.925	2618.82	1843.87	245.794	2231.34	-3.23719	0.0047991			cdna:genscan chromosome:Zv9:4:4810265:4813719:1 transcript_biotype:protein_coding	chr4:4810265-4813719
ENSDART00000021191	14499.5	11182.2	6560.39	2.848	5.97476	10747.4	4.41138	11.273	0.00481611	u2af1	GO:0000166 (nucleotide binding)	U2(RNU2) small nuclear RNA auxiliary factor 1 [Source:ZFIN;Acc:ZDB-GENE-020419-1]	chr9:9451858-9464189
ENSDART00000048423	3057.97	13337	11998.4	3.60339	10.4728	9464.43	7.0381	10.3251	0.00481978	timm50	GO:0005515 (protein binding)	translocase of inner mitochondrial membrane 50 homolog (yeast) [Source:ZFIN;Acc:ZDB-GENE-040426-1618]	chr15:19437336-19490136
ENSDART00000143542	885.71	5710.05	3382.79	5.21489	7.50633	3326.18	6.36061	8.68595	0.00483504			cdna:novel chromosome:Zv9:17:24446887:24451012:1 gene:ENSDARG00000094258 gene_biotype:protein_coding transcript_biotype:retained_intron	chr17:24446887-24451012
ENSDART00000103033	1327.83	2215.55	1557.48	376.131	462.312	1700.29	419.222	1.99386	0.00483842	unc45a	GO:0005488 (binding)	unc-45 homolog A (C. elegans) [Source:ZFIN;Acc:ZDB-GENE-050417-158]	chr25:8826203-8888596
ENSDART00000085701	14176.4	2252.39	7885.22	2.75646	2.81656	8104.68	2.78651	11.1461	0.00488148	senp5	GO:0008234 (cysteine-type peptidase activity)	SUMO/sentrin specific peptidase 5 [Source:ZFIN;Acc:ZDB-GENE-050208-772]	chr22:41963964-41976243
ENSDART00000147144	2212.31	964.535	6016.9	3.54093	2.85078	3064.58	3.19586	9.52554	0.00490773			cdna:known chromosome:Zv9:17:32828689:32835309:1 gene:ENSDARG00000055120 gene_biotype:protein_coding transcript_biotype:processed_transcript	chr17:32828689-32835309
ENSDART00000083126	3.67576	4.85159	6.9079	128.769	83.3389	5.14508	106.054	-4.37986	0.00498234	si:dkey-91f15.6	GO:0005811 (lipid particle)	cell death-inducing DFFA-like effector c [Source:HGNC Symbol;Acc:HGNC:24229]	chr6:22886996-22896421
ENSDART00000046114	19.7173	7.93437	48.0702	3009.98	1488.04	25.2406	2249.01	-6.75518	0.00502485	mef2d	GO:0046983 (protein dimerization activity)	myocyte enhancer factor 2d [Source:ZFIN;Acc:ZDB-GENE-990415-164]	chr16:31301062-31422705
ENSDART00000116664	835.465	4740.45	634.291	4.63576	2.64254	2070.07	3.63915	8.60138	0.00505605			ncrna:snoRNA chromosome:Zv9:21:39237320:39237394:1 gene:ENSDARG00000080188 gene_biotype:snoRNA transcript_biotype:snoRNA	chr21:39237320-39237394
ENSDART00000124510	3001.53	1291.15	1049.49	2.85015	6.3915	1780.72	4.62082	8.54687	0.0050688	prkcbp1l	GO:0005515 (protein binding)	protein kinase C binding protein 1, like [Source:ZFIN;Acc:ZDB-GENE-030131-2199]	chr23:9916429-9970412
ENSDART00000145369	759.925	1845.35	2097.15	9.24251	4.26568	1567.47	6.75409	7.834	0.0051007	eif6	GO:0043022 (ribosome binding)	eukaryotic translation initiation factor 6 [Source:ZFIN;Acc:ZDB-GENE-031118-110]	chr6:52290367-52299470
ENSDART00000053240	6385	13833.8	5392.19	164.658	86.4051	8536.98	125.531	6.03283	0.00511065	cab39l	GO:0005488 (binding)	calcium binding protein 39-like [Source:ZFIN;Acc:ZDB-GENE-041114-204]	chr1:47095609-47114390
ENSDART00000139551	8.3983	10.7286	9.77562	30.0362	25.5557	9.63417	27.796	-1.53121	0.00512881			cdna:known chromosome:Zv9:15:19797818:19800862:-1 gene:ENSDARG00000028259 gene_biotype:protein_coding transcript_biotype:retained_intron	chr15:19797818-19800862
ENSDART00000051141	14490.9	12939	3091.99	31.0852	24.0825	10174	27.5839	8.2515	0.0051346	tars	GO:0004829 (threonine-tRNA ligase activity)	threonyl-tRNA synthetase [Source:ZFIN;Acc:ZDB-GENE-041010-218]	chr5:45965273-45989759
ENSDART00000150917	1044.59	2953.99	5805.51	3.48729	3.14092	3268.03	3.3141	9.62681	0.00514752	si:ch211-18i17.2	GO:0005856 (cytoskeleton)	pleckstrin homology domain containing, family H (with MyTH4 domain) member 3 [Source:HGNC Symbol;Acc:HGNC:26105]	chr3:36967080-37049833
ENSDART00000015967	4543.33	2109.03	553.662	2.9506	7.85927	2402.01	5.40494	8.50055	0.0051547	lsr	GO:0005515 (protein binding)	lipolysis stimulated lipoprotein receptor [Source:ZFIN;Acc:ZDB-GENE-050913-73]	chr15:31909604-31935461
ENSDART00000134362	182.951	128.755	95.814	631.178	829.353	135.84	730.265	-2.46355	0.00516797	lmo3	GO:0008270 (zinc ion binding)	LIM domain only 3 [Source:ZFIN;Acc:ZDB-GENE-050522-201]	chr4:11677247-11743817
ENSDART00000128730	7552.21	12407.8	6843.63	1039.62	1149.88	8934.55	1094.75	2.97951	0.00519604	rbmx	GO:0003676 (nucleic acid binding)	RNA binding motif protein, X-linked [Source:ZFIN;Acc:ZDB-GENE-030131-579]	chr14:32725471-32732600
ENSDART00000151984	14325.7	13171.5	4825.02	125.212	143.764	10774.1	134.488	6.1747	0.00519631	srsf7a	GO:0008270 (zinc ion binding)	serine/arginine-rich splicing factor 7a [Source:ZFIN;Acc:ZDB-GENE-040426-1798]	chr5:38495708-38499307
ENSDART00000115373	55.4438	71.1917	59.2618	138.257	121.881	61.9658	130.069	-1.07506	0.00520438			family with sequence similarity 196, member A [Source:HGNC Symbol;Acc:HGNC:33859]	chr12:44826933-44872428
ENSDART00000143461	42412.4	40333.9	34560.7	115.301	85.8068	39102.3	100.554	8.61344	0.00521069			cdna:known chromosome:Zv9:10:22235371:22236457:1 gene:ENSDARG00000014329 gene_biotype:protein_coding transcript_biotype:processed_transcript	chr10:22235371-22236457
ENSDART00000123100	10.1446	17.2218	8.34756	220.293	215.658	11.9047	217.976	-4.26455	0.00522715	fbxl5	GO:0005515 (protein binding)	F-box and leucine-rich repeat protein 5 [Source:ZFIN;Acc:ZDB-GENE-030131-900]	chr23:46140901-46157668
ENSDART00000133098	608.033	644.721	1088.83	3394.82	4290.58	780.527	3842.7	-2.34167	0.00527036	si:dkey-79f11.5		si:dkey-79f11.5 [Source:ZFIN;Acc:ZDB-GENE-030131-9145]	chr1:6914084-6920405
ENSDART00000144485	1829.76	945.511	1848.55	32.7719	18.671	1541.27	25.7215	5.89629	0.00530197	si:ch211-197l9.2	GO:0005615 (extracellular space)	si:ch211-197l9.2 [Source:ZFIN;Acc:ZDB-GENE-091204-369]	chr23:31206265-31235335
ENSDART00000077373	9294.35	14098	3482.5	48.2749	41.7578	8958.28	45.0164	7.42183	0.00530692	zgc:162723	GO:0004872 (receptor activity)	zinc finger, DHHC-type containing 20 [Source:HGNC Symbol;Acc:HGNC:20749]	chr10:36577657-36603524
ENSDART00000137196	63840	64951.6	48631.7	17184.1	13949.5	59141.1	15566.8	1.92127	0.00531258			cdna:known chromosome:Zv9:10:25963453:25964323:-1 gene:ENSDARG00000008243 gene_biotype:protein_coding transcript_biotype:retained_intron	chr10:25963453-25964323
ENSDART00000033957	1122.6	6649.11	2044.06	8.94495	6.68663	3271.92	7.81579	8.32509	0.0053143	im:7159098	GO:0005488 (binding)	UTP20, small subunit (SSU) processome component, homolog (yeast) [Source:HGNC Symbol;Acc:HGNC:17897]	chrZv9_scaffold3539:192-43587
ENSDART00000123723	1626.15	1283.89	1805.01	4803.66	5049.49	1571.68	4926.57	-1.66214	0.00533248			ncrna:rRNA chromosome:Zv9:5:9458590:9458707:1 gene:ENSDARG00000091483 gene_biotype:rRNA transcript_biotype:rRNA	chr5:9458590-9458707
ENSDART00000132941	708.188	695.966	580.072	1422.08	1260.29	661.409	1341.19	-1.02301	0.00535559	si:ch1073-287p18.1		chromosome 8 open reading frame 82 [Source:HGNC Symbol;Acc:HGNC:33826]	chr20:52672610-52678448
ENSDART00000140513	6185.18	10851.9	2679.95	23.0195	23.7644	6572.34	23.392	7.91499	0.00538311			cdna:known chromosome:Zv9:16:15974104:15977483:1 gene:ENSDARG00000078500 gene_biotype:protein_coding transcript_biotype:retained_intron	chr16:15974104-15977483
ENSDART00000048532	71.8285	57.6595	96.2958	269.253	308.155	75.2613	288.704	-1.96838	0.00539128	slc43a2b	GO:0015179 (L-amino acid transmembrane transporter activity)	solute carrier family 43, member 2b [Source:ZFIN;Acc:ZDB-GENE-041212-6]	chr10:24803925-24822912
ENSDART00000099523	16376.1	10077.7	7360.82	7.20873	14.8616	11271.5	11.0352	10.0096	0.00539141	dtnba	GO:0008270 (zinc ion binding)	dystrobrevin, beta a [Source:ZFIN;Acc:ZDB-GENE-030131-3967]	chr20:47612656-47670957
ENSDART00000112973	17.2399	29.5898	40.413	2585	1403.6	29.0809	1994.3	-6.11828	0.00539518		GO:0005488 (binding)	phosphatidylinositol-4,5-bisphosphate 3-kinase, catalytic subunit alpha [Source:HGNC Symbol;Acc:HGNC:8975]	chrZv9_scaffold3553:105722-134443
ENSDART00000126490	7094.27	764.093	7211.81	5.56198	2.75508	5023.39	4.15853	9.75988	0.00539637	fnbp4	GO:0005515 (protein binding)	formin binding protein 4 [Source:ZFIN;Acc:ZDB-GENE-130530-633]	chr25:29507163-29535480
ENSDART00000112431	13.5841	9.72989	11.3391	25.6199	29.6093	11.551	27.6146	-1.26709	0.00539896	zgc:174680	GO:0003676 (nucleic acid binding)	zgc:174680 [Source:ZFIN;Acc:ZDB-GENE-080204-24]	chrZv9_scaffold3536:203602-207814
ENSDART00000086349	15686.9	2105.31	11077.2	4.4892	14.3622	9623.14	9.42572	9.7988	0.00540501	rnf19b	GO:0005515 (protein binding)	ring finger protein 19B [Source:ZFIN;Acc:ZDB-GENE-060503-281]	chr19:36922018-36949179
ENSDART00000127982	47.6022	36.7618	36.8433	18408.8	26763.1	40.4024	22586	-9.11256	0.00541249			ensembl:processed_transcript chromosome:Zv9:11:3327408:3341650:-1 gene:ENSDARG00000091574 gene_biotype:processed_transcript transcript_biotype:processed_transcript	chr11:3327408-3341650
ENSDART00000013609	6236.36	1380.83	6848.54	28.0446	57.4857	4821.91	42.7651	6.59907	0.00542086	tln1	GO:0005158 (insulin receptor binding)	talin 1 [Source:ZFIN;Acc:ZDB-GENE-031002-48]	chr10:8107187-8299534
ENSDART00000029133	33064.3	6485.77	18648.9	237.391	156.1	19399.7	196.746	6.36556	0.00545077	nhp2l1b	GO:0003723 (RNA binding)	NHP2 non-histone chromosome protein 2-like 1b (S. cerevisiae) [Source:ZFIN;Acc:ZDB-GENE-030131-9670]	chr12:11522871-11526264
ENSDART00000154010	1246.46	2099.34	1333.82	336.407	410.525	1559.87	373.466	2.0292	0.00554361	unc45a	GO:0005488 (binding)	unc-45 homolog A (C. elegans) [Source:ZFIN;Acc:ZDB-GENE-050417-158]	chr25:8826203-8888596
ENSDART00000023090	85.9824	87.2485	107.03	44.786	42.9587	93.4202	43.8723	1.08337	0.00555684	slc12a10.1		solute carrier family 12 (sodium/potassium/chloride transporters), member 10, tandem duplicate 1 [Source:ZFIN;Acc:ZDB-GENE-060503-330]	chr7:4597009-4632765
ENSDART00000147561	14388.7	12358	4315.45	36.1658	14.6899	10354	25.4279	8.63371	0.00555748	srsf7a	GO:0008270 (zinc ion binding)	serine/arginine-rich splicing factor 7a [Source:ZFIN;Acc:ZDB-GENE-040426-1798]	chr5:38495708-38499307
ENSDART00000125619	14804.7	6257.66	8791.6	2.88187	6.373	9951.31	4.62743	11.0895	0.00558965	thop1	GO:0008233 (peptidase activity)	thimet oligopeptidase 1 [Source:ZFIN;Acc:ZDB-GENE-040718-47]	chr11:7323094-7352166
ENSDART00000155815	2.84485	2.87742	2.92492	6865.76	7999.01	2.8824	7432.39	-11.3282	0.00564168	nova2	GO:0003723 (RNA binding)	neuro-oncological ventral antigen 2 [Source:ZFIN;Acc:ZDB-GENE-080211-1]	chr15:28034776-28115708
ENSDART00000154344	46.3589	48.6169	41.2457	21.1488	18.7514	45.4072	19.9501	1.18573	0.00564603	ciz1a	GO:0008270 (zinc ion binding)	cdkn1a interacting zinc finger protein 1a [Source:ZFIN;Acc:ZDB-GENE-100922-222]	chr5:1564179-1594021
ENSDART00000004423	759.535	3062.48	2366.05	42.1083	29.0579	2062.69	35.5831	5.65746	0.00566579	iars	GO:0004822 (isoleucine-tRNA ligase activity)	isoleucyl-tRNA synthetase [Source:ZFIN;Acc:ZDB-GENE-030131-6325]	chr11:1302660-1357500
ENSDART00000012877	15.4625	18.7309	4.8665	329.056	523.293	13.0199	426.175	-5.20986	0.0056859	ero1l	GO:0016671 (oxidoreductase activity, acting on a sulfur group of donors, disulfide as acceptor)	ERO1-like (S. cerevisiae) [Source:ZFIN;Acc:ZDB-GENE-040426-1312]	chr17:14859458-14870878
ENSDART00000124570	69.7959	59.3842	73.1567	33.8336	32.7993	67.4456	33.3164	1.01201	0.00571143			Uncharacterized protein [Source:UniProtKB/TrEMBL;Acc:E7F9G5]	chr3:6571016-6598187
ENSDART00000023981	18.2118	14.9211	20.777	41.097	48.2296	17.9699	44.6633	-1.32207	0.00572913		GO:0004713 (protein tyrosine kinase activity)	tau tubulin kinase 1 [Source:HGNC Symbol;Acc:HGNC:19140]	chr11:31547781-31598352
ENSDART00000155065	967.425	6123.97	4465.41	2.69856	3.23813	3852.27	2.96835	9.97727	0.00573129	plekhg2	GO:0005089 (Rho guanyl-nucleotide exchange factor activity)	pleckstrin homology domain containing, family G (with RhoGef domain) member 2 [Source:ZFIN;Acc:ZDB-GENE-090819-1]	chr15:19242947-19312278
ENSDART00000144956	567.238	270.68	139.281	14743.1	10688.9	325.733	12716	-5.49908	0.00574828			cdna:known chromosome:Zv9:4:16984116:17017502:-1 gene:ENSDARG00000003512 gene_biotype:protein_coding transcript_biotype:processed_transcript	chr4:16984116-17017502
ENSDART00000017427	2255.03	2905.83	8102.99	20.3047	45.8647	4421.28	33.0847	6.94444	0.00579339	rnpc3	GO:0000166 (nucleotide binding)	RNA-binding region (RNP1, RRM) containing 3 [Source:ZFIN;Acc:ZDB-GENE-060312-35]	chr24:29857725-29889548
ENSDART00000014887	14823.5	18271.2	7324.3	814.159	1004.43	13473	909.292	3.79646	0.00579793	eif4a3	GO:0008026 (ATP-dependent helicase activity)	eukaryotic translation initiation factor 4A, isoform 3 [Source:ZFIN;Acc:ZDB-GENE-040426-915]	chr11:45992037-46009554
ENSDART00000037181	8366.75	5561.78	1214.43	3.17841	2.68228	5047.65	2.93035	10.3601	0.00580584	ufc1	GO:0071568 (UFM1 conjugating enzyme activity)	ubiquitin-fold modifier conjugating enzyme 1 [Source:ZFIN;Acc:ZDB-GENE-040801-268]	chr5:59064725-59067961
ENSDART00000024514	6266.81	3501.87	1660.14	21.7994	21.9168	3809.6	21.8581	7.24475	0.00580803	chordc1b		cysteine and histidine-rich domain (CHORD) containing 1b [Source:ZFIN;Acc:ZDB-GENE-040426-1288]	chr10:25830712-25838818
ENSDART00000011540	41644.2	33665.6	25085.8	8436.39	10296	33465.2	9366.2	1.8137	0.00582018	bzw1b	GO:0005488 (binding)	basic leucine zipper and W2 domains 1b [Source:ZFIN;Acc:ZDB-GENE-040426-2881]	chr9:50228-57751
ENSDART00000148003	1117.04	6847.45	4247.41	18.7499	6.92892	4070.63	12.8394	8.12901	0.00582829	commd9		COMM domain containing 9 [Source:ZFIN;Acc:ZDB-GENE-070424-139]	chr17:24446797-24451153
ENSDART00000031547	18188.7	5950.31	6758.15	258.773	130.966	10299.1	194.869	5.61301	0.0058284	smndc1	GO:0003723 (RNA binding)	survival motor neuron domain containing 1 [Source:ZFIN;Acc:ZDB-GENE-030131-614]	chr17:20068101-20074108
ENSDART00000087114	1678.05	4839.66	1343.43	17.5739	7.38041	2620.38	12.4772	7.60545	0.00584462	alg5	GO:0016757 (transferase activity, transferring glycosyl groups)	asparagine-linked glycosylation 5 homolog (yeast, dolichyl-phosphate beta-glucosyltransferase) [Source:ZFIN;Acc:ZDB-GENE-030131-6586]	chr10:36008055-36026169
ENSDART00000110593	11.6583	8.37458	10.5631	25.2153	23.0669	10.1986	24.1411	-1.25524	0.00589828	mgaa	GO:0046983 (protein dimerization activity)	MAX gene associated a [Source:ZFIN;Acc:ZDB-GENE-030603-1]	chr17:10011287-10034868
ENSDART00000146857	853.327	4153.43	1504.18	15.0157	20.3769	2170.31	17.6963	6.64197	0.0059105			cdna:putative chromosome:Zv9:10:21515996:21518515:1 gene:ENSDARG00000043976 gene_biotype:protein_coding transcript_biotype:processed_transcript	chr10:21515996-21518515
ENSDART00000150208	34.4606	39.0759	22.0536	149.101	124.684	31.8634	136.892	-2.13846	0.00595389	mecr		mitochondrial trans-2-enoyl-CoA reductase [Source:ZFIN;Acc:ZDB-GENE-050417-399]	chr16:5639803-5652396
ENSDART00000130961	6.89246	8.47227	9.94754	20.0257	22.1213	8.43742	21.0735	-1.33487	0.00602956	hsf4	GO:0043565 (sequence-specific DNA binding)	heat shock transcription factor 4 [Source:ZFIN;Acc:ZDB-GENE-050306-18]	chr18:22523979-22534348
ENSDART00000144217	2271.69	1048.85	7159.96	5.4718	7.23421	3493.5	6.35301	8.67653	0.00603411	ctsba	GO:0008233 (peptidase activity)	cathepsin B, a [Source:ZFIN;Acc:ZDB-GENE-040426-2650]	chr17:32828689-32837272
ENSDART00000006132	68491.3	74588.7	55766.3	30117.5	32835.1	66282.1	31476.3	1.06517	0.00603686	cfl1	GO:0003779 (actin binding)	cofilin 1 [Source:ZFIN;Acc:ZDB-GENE-030131-215]	chr14:31665188-31671184
ENSDART00000134676	1332.32	944.069	1199.25	3526.61	4359.18	1158.54	3942.89	-1.77349	0.00605072			havana:processed_transcript chromosome:Zv9:13:29730262:29731203:-1 gene:ENSDARG00000093614 gene_biotype:processed_transcript transcript_biotype:processed_transcript	chr13:29730262-29731203
ENSDART00000129261	3680.38	1763.27	674.857	5.10153	6.10502	2039.5	5.60328	8.19558	0.00605267	lpar1	GO:0070915 (lysophosphatidic acid receptor activity)	lysophosphatidic acid receptor 1 [Source:ZFIN;Acc:ZDB-GENE-030616-499]	chr10:12068051-12135262
ENSDART00000136047	1776.05	5333.97	1573.61	3.24058	8.33374	2894.55	5.78716	8.8875	0.00608511	hdac8	GO:0004407 (histone deacetylase activity)	histone deacetylase 8 [Source:ZFIN;Acc:ZDB-GENE-040426-2772]	chr7:53111279-53204522
ENSDART00000157111	25421.8	21389.9	10838.1	677.116	660.897	19216.6	669.006	4.75498	0.00608828			havana:antisense chromosome:Zv9:19:11503872:11505108:1 gene:ENSDARG00000096894 gene_biotype:antisense transcript_biotype:antisense	chr19:11503872-11505108
ENSDART00000134565	49.2255	79.028	125.665	1066.43	1266.46	84.6395	1166.44	-3.88289	0.00609232			cdna:known chromosome:Zv9:9:24847377:24850284:-1 gene:ENSDARG00000040453 gene_biotype:protein_coding transcript_biotype:retained_intron	chr9:24847377-24850284
ENSDART00000092925	997.366	6861.03	4126.03	3.21377	2.74555	3994.81	2.97966	10.0016	0.00610558	commd9	GO:0003674 (molecular_function)	COMM domain containing 9 [Source:ZFIN;Acc:ZDB-GENE-070424-139]	chr17:24446797-24451153
ENSDART00000143270	474.544	191.771	234.865	4690.55	3955.64	300.393	4323.1	-3.95618	0.00614981			havana:processed_transcript chromosome:Zv9:16:29824373:29826547:-1 gene:ENSDARG00000094193 gene_biotype:processed_transcript transcript_biotype:retained_intron	chr16:29824373-29826547
ENSDART00000131085	4.55355	5.0691	9.32546	33.4581	43.4402	6.31604	38.4491	-2.66932	0.00615348	rnf213b		ring finger protein 213b [Source:ZFIN;Acc:ZDB-GENE-110822-1]	chr12:37723794-37878499
ENSDART00000136051	1137.97	680.43	5635.27	2.75625	4.23493	2484.56	3.49559	8.90175	0.00615844	prkcsh	GO:0005515 (protein binding)	protein kinase C substrate 80K-H [Source:ZFIN;Acc:ZDB-GENE-040426-770]	chr3:46800816-46833402
ENSDART00000149303	15.8818	15.8515	21.1525	46.7053	56.5329	17.6286	51.6191	-1.55706	0.00616053	sord	GO:0016491 (oxidoreductase activity)	sorbitol dehydrogenase [Source:ZFIN;Acc:ZDB-GENE-040426-1231]	chr7:32257793-32260540
GENSCAN00000013243	10778.6	3202.83	11244.5	35.213	13.6439	8408.66	24.4284	8.37854	0.00626203			cdna:genscan chromosome:Zv9:22:12930130:12962506:1 transcript_biotype:protein_coding	chr22:12930130-12962506
ENSDART00000109292	5188.37	6206.26	1928.61	2.87026	7.48723	4441.08	5.17874	9.7385	0.00626545	ubap2	GO:0005515 (protein binding)	ubiquitin associated protein 2 [Source:ZFIN;Acc:ZDB-GENE-070424-16]	chr21:10340797-10379322
ENSDART00000058470	2.8233	2.77507	16.0781	3822.31	4627.35	7.22548	4224.83	-9.71246	0.00630152			cdna:known chromosome:Zv9:5:55209237:55211780:-1 gene:ENSDARG00000038524 gene_biotype:protein_coding transcript_biotype:processed_transcript	chr5:55209237-55211780
ENSDART00000140327	1790.86	5370.3	1654.88	24.2147	10.3569	2938.68	17.2858	7.31141	0.00630684			cdna:known chromosome:Zv9:10:36008076:36015866:-1 gene:ENSDARG00000061235 gene_biotype:protein_coding transcript_biotype:processed_transcript	chr10:36008076-36015866
ENSDART00000119257	141.828	155.099	108.361	356.749	384.667	135.096	370.708	-1.47153	0.00632251			ncrna:rRNA chromosome:Zv9:21:21956022:21956136:1 gene:ENSDARG00000083857 gene_biotype:rRNA transcript_biotype:rRNA	chr21:21956022-21956136
ENSDART00000120299	2074.85	1335.06	1619.49	4349.69	5149.86	1676.47	4749.77	-1.5209	0.00633973			ncrna:rRNA chromosome:Zv9:5:40312643:40312759:1 gene:ENSDARG00000084899 gene_biotype:rRNA transcript_biotype:rRNA	chr5:40312643-40312759
ENSDART00000106082	2.93328	3.56874	3.88737	8.1779	8.51222	3.46313	8.34506	-1.27839	0.00637118	zgc:112368	GO:0004252 (serine-type endopeptidase activity)	chymotrypsin-like elastase family, member 1 [Source:HGNC Symbol;Acc:HGNC:3308]	chr22:7500874-7508215
ENSDART00000140860	10.1677	17.4916	35.2399	281.688	452.544	20.9664	367.116	-4.27539	0.00637996	si:dkey-83f18.10	GO:0030246 (carbohydrate binding)	si:dkey-83f18.10 [Source:ZFIN;Acc:ZDB-GENE-070705-495]	chr7:4694723-4696685
ENSDART00000128666	125.711	240.703	449.581	2.72589	2.9341	271.998	2.82999	6.39935	0.00639132	zbtb2b	GO:0005515 (protein binding)	zinc finger and BTB domain containing 2b [Source:ZFIN;Acc:ZDB-GENE-040426-2753]	chr20:26423931-26436840
ENSDART00000142420	4259.87	9406.8	3420.86	67.3018	32.0193	5695.84	49.6606	6.79535	0.00639846	zgc:92510	GO:0016747 (transferase activity, transferring acyl groups other than amino-acyl groups)	K(lysine) acetyltransferase 5 [Source:HGNC Symbol;Acc:HGNC:5275]	chr5:25266075-25274883
ENSDART00000103986	7490.3	642.756	5525.94	2.96796	8.44412	4553	5.70604	9.21994	0.00640519	fam3a	GO:0003674 (molecular_function)	family with sequence similarity 3, member A [Source:ZFIN;Acc:ZDB-GENE-040426-1772]	chr23:25423197-25437627
ENSDART00000099617	5.75399	7.99252	7.7923	3.14021	2.69327	7.1796	2.91674	1.28831	0.00640577	nf2a	GO:0008092 (cytoskeletal protein binding)	neurofibromin 2a (merlin) [Source:ZFIN;Acc:ZDB-GENE-080722-7]	chr5:12816213-12897784
ENSDART00000057469	154.091	108.298	138.119	439.148	359.484	133.503	399.316	-1.58875	0.00642113	vstm4a	GO:0005515 (protein binding)	V-set and transmembrane domain containing 4a [Source:ZFIN;Acc:ZDB-GENE-060810-69]	chr13:31174757-31191386
ENSDART00000120630	2170.72	2479.99	2894.53	5292.66	4907.24	2515.08	5099.95	-1.02884	0.00643495			ncrna:rRNA chromosome:Zv9:2:35552162:35552278:1 gene:ENSDARG00000085230 gene_biotype:rRNA transcript_biotype:rRNA	chr2:35552162-35552278
ENSDART00000109513	16.7655	12.7785	18.8319	56.0528	53.2433	16.1253	54.648	-1.77889	0.00648962	lonrf1	GO:0005515 (protein binding)	LON peptidase N-terminal domain and ring finger 1 [Source:ZFIN;Acc:ZDB-GENE-101021-4]	chr14:35154723-35176681
ENSDART00000024137	3112.79	8440.04	11070	65.6172	61.3292	7540.94	63.4732	6.70655	0.00649132	p4ha2	GO:0051213 (dioxygenase activity)	procollagen-proline, 2-oxoglutarate 4-dioxygenase (proline 4-hydroxylase), alpha polypeptide 2 [Source:ZFIN;Acc:ZDB-GENE-030827-1]	chr21:41503345-41537355
ENSDART00000038696	9401.17	2662.17	6187.16	284.272	198.796	6083.5	241.534	4.49755	0.00649824	flvcr2b	GO:0016021 (integral component of membrane)	feline leukemia virus subgroup C cellular receptor family, member 2b [Source:ZFIN;Acc:ZDB-GENE-041210-312]	chr20:46562239-46600061
ENSDART00000023780	21936.8	2399.52	10536.4	2.68447	2.67909	11624.2	2.68178	11.581	0.00650864	qars	GO:0004819 (glutamine-tRNA ligase activity)	glutaminyl-tRNA synthetase [Source:ZFIN;Acc:ZDB-GENE-040426-1011]	chr8:48507066-48539923
ENSDART00000033608	42.8949	19.7004	11.0948	961.38	1199.58	24.5634	1080.48	-5.67041	0.00653637			purine-rich element binding protein A [Source:HGNC Symbol;Acc:HGNC:9701]	chr14:8240721-8241560
ENSDART00000156382	34057.7	10216.9	5980.17	18.3288	53.4058	16751.6	35.8673	8.67263	0.00654586			cdna:known chromosome:Zv9:11:45996336:46000697:1 gene:ENSDARG00000014472 gene_biotype:protein_coding transcript_biotype:retained_intron	chr11:45996336-46000697
ENSDART00000078093	128.147	259.748	426.051	2.85463	5.89547	271.315	4.37505	5.88271	0.00654739	zbtb2b	GO:0005515 (protein binding)	zinc finger and BTB domain containing 2b [Source:ZFIN;Acc:ZDB-GENE-040426-2753]	chr20:26423931-26436840
ENSDART00000133033	51.1274	52.7305	33.8412	1237.08	822.496	45.8997	1029.79	-4.48586	0.00656119			cdna:known chromosome:Zv9:15:36525796:36527568:-1 gene:ENSDARG00000068680 gene_biotype:protein_coding transcript_biotype:retained_intron	chr15:36525796-36527568
ENSDART00000151981	2651.47	1914.28	1968.99	6030.28	5634.5	2178.25	5832.39	-1.43624	0.00656247	si:ch211-223g7.7	GO:0005515 (protein binding)	si:ch211-223g7.7 [Source:ZFIN;Acc:ZDB-GENE-050420-18]	chr4:45363684-45389294
ENSDART00000129942	15264.6	11236.3	2435.89	10.0741	8.8217	9645.59	9.44789	9.63119	0.00657064	tma7	GO:0003674 (molecular_function)	translational machinery associated 7 homolog (S. cerevisiae) [Source:ZFIN;Acc:ZDB-GENE-061027-176]	chr22:5587616-5593107
ENSDART00000011324	2.9529	3.04657	2.94572	8.73131	8.25832	2.98173	8.49482	-1.51005	0.00657856	ccdc102a		coiled-coil domain containing 102A [Source:ZFIN;Acc:ZDB-GENE-030131-4044]	chr7:30061203-30173826
ENSDART00000148063	5065.19	1683.43	1370.96	50.0529	68.2179	2706.52	59.1354	5.27945	0.00658606			havana:processed_transcript chromosome:Zv9:19:27949599:27954927:-1 gene:ENSDARG00000095427 gene_biotype:processed_transcript transcript_biotype:lincRNA	chr19:27949599-27954927
ENSDART00000133203	10328.5	1696.51	7955.35	39.0787	72.2468	6660.13	55.6627	6.60855	0.00662606	lepb	GO:0005576 (extracellular region)	leptin b [Source:ZFIN;Acc:ZDB-GENE-041210-183]	chr4:18099952-18101989
ENSDART00000058460	4922.22	1042.22	2484.9	12.5454	11.3487	2816.44	11.947	7.61307	0.00663577	utp11l	GO:0019012 (virion)	UTP11-like, U3 small nucleolar ribonucleoprotein (yeast) [Source:ZFIN;Acc:ZDB-GENE-030131-8093]	chr16:35959382-35964239
ENSDART00000144560	26.0528	85.9824	36.6131	3139.67	2977.74	49.5494	3058.71	-6.13699	0.0066598	dgcr8	GO:0005515 (protein binding)	DiGeorge syndrome critical region gene 8 [Source:ZFIN;Acc:ZDB-GENE-030131-3421]	chr5:26189372-26201321
ENSDART00000045329	18.7872	9.55833	110.357	15649.8	7441.8	46.2341	11545.8	-8.63949	0.00666372	zgc:158387	GO:0004602 (glutathione peroxidase activity)	zgc:158387 [Source:ZFIN;Acc:ZDB-GENE-061215-48]	chr13:46096369-46102191
ENSDART00000067095	543.3	538.48	109.231	2.90234	5.92339	397.003	4.41287	6.25804	0.00666526	nek8	GO:0004713 (protein tyrosine kinase activity)	NIMA (never in mitosis gene a)-related kinase 8 [Source:ZFIN;Acc:ZDB-GENE-020509-1]	chr15:14498457-14533028
ENSDART00000146677	8646.87	4761.01	7325.85	427.332	649.631	6911.24	538.481	3.66992	0.00667867	knop1		lysine-rich nucleolar protein 1 [Source:ZFIN;Acc:ZDB-GENE-090313-76]	chr1:55223065-55235466
ENSDART00000125304	95.0373	143.116	60.3841	4018.06	2251.76	99.5125	3134.91	-5.00538	0.00671127		GO:0016773 (phosphotransferase activity, alcohol group as acceptor)	Uncharacterized protein [Source:UniProtKB/TrEMBL;Acc:E7FG79]	chr16:56301685-56304912
ENSDART00000090335	25.4093	8.38559	60.7561	7763.46	24770.6	31.517	16267	-9.20603	0.00671359	hipk2	GO:0016773 (phosphotransferase activity, alcohol group as acceptor)	homeodomain interacting protein kinase 2 [Source:ZFIN;Acc:ZDB-GENE-031125-4]	chr18:11910098-12102227
ENSDART00000024528	5622.32	6240.02	1115.03	17.6765	42.43	4325.79	30.0532	6.95366	0.00672188	emc7	GO:0030246 (carbohydrate binding)	ER membrane protein complex subunit 7 [Source:ZFIN;Acc:ZDB-GENE-041001-170]	chr20:29243743-29251851
ENSDART00000125831	45.3852	75.3724	60.4718	217.201	177.383	60.4098	197.292	-1.7307	0.00672319	si:dkey-179j5.5	GO:0030246 (carbohydrate binding)	si:dkey-179j5.5 [Source:ZFIN;Acc:ZDB-GENE-070705-320]	chr22:25463350-25469191
ENSDART00000048095	15583.8	32082.5	13406.6	508.627	267.514	20357.6	388.07	5.67567	0.00673314	elac2	GO:0016787 (hydrolase activity)	elaC homolog 2 (E. coli) [Source:ZFIN;Acc:ZDB-GENE-041111-227]	chr3:11437439-11483866
ENSDART00000124094	170.206	636.924	184.481	3.85427	4.99914	330.537	4.42671	5.95041	0.00674612	daxx		death-associated protein 6 [Source:ZFIN;Acc:ZDB-GENE-010110-3]	chr19:7636988-7656206
ENSDART00000144061	17.9941	20.2277	24.0066	10.4439	9.71218	20.7428	10.0781	1.03216	0.00674613	si:ch73-142c19.2	GO:0016787 (hydrolase activity)	protein tyrosine phosphatase domain containing 1 [Source:HGNC Symbol;Acc:HGNC:30184]	chr23:4424411-4441393
ENSDART00000081977	387.22	330.424	145.963	12985.7	6850.65	287.869	9918.18	-5.15178	0.00680732	si:ch73-157i16.3	GO:0030131 (clathrin adaptor complex)	golgi-associated, gamma adaptin ear containing, ARF binding protein 3 [Source:HGNC Symbol;Acc:HGNC:17079]	chr3:6891671-6916966
ENSDART00000154711	29.6739	23.3466	34.5171	66.5087	77.5194	29.1792	72.014	-1.31748	0.00695893			cdna:known_by_projection chromosome:Zv9:17:45065903:45088504:1 gene:ENSDARG00000004158 gene_biotype:protein_coding transcript_biotype:retained_intron	chr17:45065903-45088504
ENSDART00000151340	149.852	106.024	131.177	57.8649	49.1809	129.018	53.5229	1.25968	0.00701574	si:ch73-248e21.6	GO:0008233 (peptidase activity)		chr3:32757551-32766465
ENSDART00000141287	296.038	146.235	423.695	5588.01	6545.82	288.656	6066.92	-4.51935	0.00702935	blvrb	GO:0050662 (coenzyme binding)	biliverdin reductase B (flavin reductase (NADPH)) [Source:ZFIN;Acc:ZDB-GENE-030131-1516]	chr18:44559958-44568561
ENSDART00000136991	77.684	71.4735	59.8209	36.2761	31.6753	69.6595	33.9757	1.0307	0.00706951	irf2bp2a		interferon regulatory factor 2 binding protein 2a [Source:ZFIN;Acc:ZDB-GENE-030131-7809]	chr13:50421510-50422920
ENSDART00000056286	8.82455	9.0676	4.83725	13676.9	28910.9	7.57647	21293.9	-11.4139	0.0070784	h1f0	GO:0003677 (DNA binding)	H1 histone family, member 0 [Source:ZFIN;Acc:ZDB-GENE-030131-337]	chr24:39080413-39081743
ENSDART00000025997	11.5207	2.78639	3.47535	885.246	2399.52	5.92749	1642.38	-8.24199	0.00709084	si:dkey-7l6.7	GO:0008134 (transcription factor binding)	DIP2 disco-interacting protein 2 homolog C (Drosophila) [Source:HGNC Symbol;Acc:HGNC:29150]	chr2:42596779-42680096
ENSDART00000045071	26922.9	7906.38	6716.91	113.907	252.909	13848.7	183.408	6.05255	0.00709573	foxk2	GO:0008301 (DNA binding, bending)	forkhead box K2 [Source:ZFIN;Acc:ZDB-GENE-030131-2861]	chr12:276711-286613
ENSDART00000009826	2.92767	3.22974	25.5312	2646.59	1051.63	10.5629	1849.11	-8.06571	0.00711038	mef2d	GO:0046983 (protein dimerization activity)	myocyte enhancer factor 2d [Source:ZFIN;Acc:ZDB-GENE-990415-164]	chr16:31301062-31422705
ENSDART00000118483	1053.66	1332.32	761.132	3545.02	4135.94	1049.04	3840.48	-1.90515	0.00714836			ncrna:miRNA chromosome:Zv9:5:38844641:38844744:-1 gene:ENSDARG00000083229 gene_biotype:miRNA transcript_biotype:miRNA	chr5:38844641-38844744
ENSDART00000006221	56.6996	27.2726	26.3108	1228.82	693.726	36.761	961.271	-4.74656	0.00714986		GO:0005515 (protein binding)	neurobeachin-like 1 [Source:HGNC Symbol;Acc:HGNC:20681]	chr6:4127303-4241535
GENSCAN00000030668	20115.9	17070.3	30500.5	42.8949	22.8941	22562.2	32.8945	9.44745	0.00715691			cdna:genscan chromosome:Zv9:22:44485:52085:-1 transcript_biotype:protein_coding	chr22:44485-52085
ENSDART00000151101	5390.55	3643.64	3898.84	10721.5	12016.6	4311.01	11369.1	-1.41841	0.00718376			cdna:known chromosome:Zv9:6:40957092:40959482:-1 gene:ENSDARG00000028379 gene_biotype:protein_coding transcript_biotype:retained_intron	chr6:40957092-40959482
ENSDART00000128587	21719.3	21756.7	20575.6	1463.4	1300.21	21350.5	1381.81	3.95168	0.00719655	ddx54	GO:0016818 (hydrolase activity, acting on acid anhydrides, in phosphorus-containing anhydrides)	DEAD (Asp-Glu-Ala-Asp) box polypeptide 54 [Source:ZFIN;Acc:ZDB-GENE-021220-2]	chr5:75308842-75341152
ENSDART00000144453	525.264	748.536	414.015	3401.7	3171.87	562.605	3286.79	-2.58879	0.00721839	si:dkey-78l4.12	GO:0008236 (serine-type peptidase activity)		chr22:19835531-19837118
ENSDART00000057865	7956.52	1531.28	11618.3	24.3512	43.1855	7035.35	33.7684	7.32832	0.00723866	ier3ip1	GO:0003674 (molecular_function)	immediate early response 3 interacting protein 1 [Source:ZFIN;Acc:ZDB-GENE-050506-106]	chr10:14571358-14574196
ENSDART00000050098	41.0017	26.7263	35.2004	9.79974	10.5043	34.3095	10.152	1.73561	0.00729695	cpne5	GO:0005515 (protein binding)	copine V [Source:ZFIN;Acc:ZDB-GENE-040426-1398]	chr11:2985132-3239759
ENSDART00000109251	260.256	244.809	113.623	1972.18	1563.49	206.229	1767.84	-3.18226	0.00731014	mpz	GO:0005515 (protein binding)	myelin protein zero [Source:ZFIN;Acc:ZDB-GENE-010724-4]	chr2:44320983-44344410
ENSDART00000125447	29.6054	31.9381	21.1804	193.548	142.772	27.5746	168.16	-2.61384	0.0073322	si:ch1073-185p12.2	GO:0005525 (GTP binding)	si:ch1073-185p12.2 [Source:ZFIN;Acc:ZDB-GENE-110411-196]	chr2:58868462-58904922
ENSDART00000142565	1532.11	5392.19	8629.7	10.5351	10.7003	5184.67	10.6177	8.60933	0.00738314	eif6	GO:0043022 (ribosome binding)	eukaryotic translation initiation factor 6 [Source:ZFIN;Acc:ZDB-GENE-031118-110]	chr6:52290367-52299470
ENSDART00000139064	7651.77	11449.3	10097.2	3174.3	3441.72	9732.73	3308.01	1.53817	0.00738324	pfn2l	GO:0003779 (actin binding)	profilin 2 like [Source:ZFIN;Acc:ZDB-GENE-030131-34]	chr2:9935926-9940736
ENSDART00000034968	2.67865	39.6329	6.31726	17519.7	10755.4	16.2096	14137.6	-10.6149	0.00738786	ufd1l	GO:0071466 (cellular response to xenobiotic stimulus)	ubiquitin fusion degradation 1-like [Source:ZFIN;Acc:ZDB-GENE-040718-150]	chr8:4969785-4984936
ENSDART00000126072	359.9	90.0158	68.0358	12932.2	8665.31	172.65	10798.7	-6.34593	0.00740749		GO:0003774 (motor activity)	Uncharacterized protein [Source:UniProtKB/TrEMBL;Acc:E7F7N0]	chr21:1801895-1808089
ENSDART00000125458	45.8597	18.7499	18.7309	352.902	619.201	27.7802	486.051	-4.21026	0.00741834		GO:0005515 (protein binding)	Uncharacterized protein [Source:UniProtKB/TrEMBL;Acc:E7EZU0]	chr14:36626339-36627952
GENSCAN00000008631	5091.6	5559.52	3918.17	14292.9	13658.6	4856.43	13975.8	-1.54007	0.00743199			cdna:genscan chromosome:Zv9:1:28591848:28636776:-1 transcript_biotype:protein_coding	chr1:28591848-28636776
ENSDART00000013203	5521.01	2912.47	6412.86	17.3539	35.296	4948.78	26.325	7.56585	0.00748048	cse1l	GO:0005488 (binding)	chromosome segregation 1-like (S. cerevisiae) [Source:ZFIN;Acc:ZDB-GENE-990603-1]	chr11:5552987-5574422
ENSDART00000145398	22.4691	19.9598	12.364	132.621	93.012	18.2643	112.817	-2.6496	0.00758745			cdna:known_by_projection chromosome:Zv9:15:28489228:28492184:1 gene:ENSDARG00000040966 gene_biotype:protein_coding transcript_biotype:retained_intron	chr15:28489228-28492184
ENSDART00000148356	41564.6	28425.7	34488.1	11217.1	13696.5	34826.1	12456.8	1.47312	0.00765679	perp	GO:0016020 (membrane)	PERP, TP53 apoptosis effector [Source:ZFIN;Acc:ZDB-GENE-050104-1]	chr13:1027437-1042596
ENSDART00000082087	21563	3047.48	19369.6	12.7984	15.8627	14660	14.3306	9.571	0.00769855	nip7	GO:0003723 (RNA binding)	nuclear import 7 homolog (S. cerevisiae) [Source:ZFIN;Acc:ZDB-GENE-050522-256]	chr18:4479877-4486355
ENSDART00000147012	36587.3	12856.7	14957.8	1800.31	1286.34	21467.3	1543.33	3.65442	0.00770111			cdna:known chromosome:Zv9:5:43135098:43139153:1 gene:ENSDARG00000020008 gene_biotype:protein_coding transcript_biotype:processed_transcript	chr5:43135098-43139153
GENSCAN00000025585	7800.44	6162.42	9239.04	20107.6	17422	7733.97	18764.8	-1.29465	0.00771413			cdna:genscan chromosome:Zv9:4:41384424:41389285:-1 transcript_biotype:protein_coding	chr4:41384424-41389285
ENSDART00000061435	13.2082	2.71273	38.7064	11550.1	6675.26	18.2091	9112.67	-9.62091	0.00776288	hsbp1b	GO:0006950 (response to stress)	heat shock factor binding protein 1b [Source:ZFIN;Acc:ZDB-GENE-040426-1721]	chr18:13920193-13923528
ENSDART00000148774	8429.8	975.657	3888.31	2.74656	2.98307	4431.26	2.86482	10.1149	0.007791	utp15	GO:0005515 (protein binding)	utp15, U3 small nucleolar ribonucleoprotein, homolog [Source:ZFIN;Acc:ZDB-GENE-030131-3831]	chr18:6123286-6142697
ENSDART00000150570	904.319	342.05	227.596	7253.61	11924.6	491.322	9589.12	-4.49338	0.00779962			cdna:known chromosome:Zv9:22:30102941:30115707:-1 gene:ENSDARG00000071095 gene_biotype:protein_coding transcript_biotype:processed_transcript	chr22:30102941-30115707
ENSDART00000121970	26086.3	2801.01	29789.7	22.6569	60.5216	19559	41.5893	8.45113	0.00780693			cdna:known chromosome:Zv9:13:1000159:1001892:-1 gene:ENSDARG00000008502 gene_biotype:protein_coding transcript_biotype:retained_intron	chr13:1000159-1001892
ENSDART00000105168	27.8625	50.5834	185.525	6257.32	3261.27	87.9901	4759.29	-6.1425	0.00781658	si:ch211-133n4.4	GO:0016787 (hydrolase activity)	endonuclease domain containing 1 [Source:HGNC Symbol;Acc:HGNC:29129]	chr19:3800319-3803134
GENSCAN00000013515	2476.14	4018.06	1747.08	24881.5	21497.8	2747.1	23189.6	-3.15838	0.00783286			cdna:genscan chromosome:Zv9:6:17170636:17188239:-1 transcript_biotype:protein_coding	chr6:17170636-17188239
ENSDART00000057584	11543.8	7765.22	10100.7	143.707	93.1728	9803.24	118.44	6.38552	0.00784311	slc1a4	GO:0017153 (sodium:dicarboxylate symporter activity)	solute carrier family 1 (glutamate/neutral amino acid transporter), member 4 [Source:ZFIN;Acc:ZDB-GENE-030616-566]	chr13:24655104-24671375
GENSCAN00000000601	1448.08	3900.89	907.936	44.4261	64.1474	2085.64	54.2867	5.01366	0.00786171			cdna:genscan chromosome:Zv9:8:25503298:25516445:1 transcript_biotype:protein_coding	chr8:25503298-25516445
ENSDART00000110079	2.7604	2.83129	4.03253	5120.16	8933	3.20807	7026.58	-11.0641	0.00790474			Uncharacterized protein [Source:UniProtKB/TrEMBL;Acc:F1RDE0]	chr8:32060654-32066616
ENSDART00000125537	1279.96	1275.87	1490	5967.5	7113.88	1348.61	6540.69	-2.27625	0.00791962		GO:0046872 (metal ion binding)	Uncharacterized protein [Source:UniProtKB/TrEMBL;Acc:E7FDC0]	chr5:62486748-62489605
ENSDART00000143679	522.795	746.353	442.35	3059.67	2993.14	570.5	3026.41	-2.44235	0.00795442	si:dkey-78l4.12	GO:0004252 (serine-type endopeptidase activity)		chr22:19835531-19837118
ENSDART00000128657	679.323	1650.56	5349.82	3.1979	2.79275	2559.9	2.99533	9.24792	0.00796074	ociad1	GO:0003674 (molecular_function)	OCIA domain containing 1 [Source:ZFIN;Acc:ZDB-GENE-040426-1100]	chr20:23233133-23242389
ENSDART00000133842	4615.4	19489.9	2628.31	33.2751	23.3943	8911.21	28.3347	7.79197	0.00799507	srsf7a	GO:0008270 (zinc ion binding)	serine/arginine-rich splicing factor 7a [Source:ZFIN;Acc:ZDB-GENE-040426-1798]	chr5:38495708-38499307
ENSDART00000083111	89.3603	63.8474	30.1638	910.177	1681.4	61.1238	1295.79	-4.47511	0.00800871	ttyh3a		tweety homolog 3a (Drosophila) [Source:ZFIN;Acc:ZDB-GENE-120508-1]	chr3:41950140-42081359
ENSDART00000022021	3.16724	3.70011	2.89677	7.04993	6.95368	3.25471	7.0018	-1.11261	0.00803977	ccdc77		coiled-coil domain containing 77 [Source:ZFIN;Acc:ZDB-GENE-050913-54]	chr25:3666022-3679403
ENSDART00000025046	17960.5	28771.7	28541.4	5860.61	5418.76	25091.2	5639.68	2.1216	0.0080484	ppp1caa	GO:0004721 (phosphoprotein phosphatase activity)	protein phosphatase 1, catalytic subunit, alpha isoform a [Source:ZFIN;Acc:ZDB-GENE-040516-3]	chr3:31039245-31060606
ENSDART00000144330	27.2726	48.0011	53.0093	2028.85	1157.34	42.761	1593.1	-5.22068	0.00805136			havana:processed_transcript chromosome:Zv9:4:54089917:54091545:-1 gene:ENSDARG00000094212 gene_biotype:processed_transcript transcript_biotype:processed_transcript	chr4:54089917-54091545
ENSDART00000143253	400.841	558.334	1082.31	4748.12	7065.36	680.494	5906.74	-3.21592	0.00806908	si:dkey-199m13.3	GO:0046872 (metal ion binding)	si:dkey-199m13.3 [Source:ZFIN;Acc:ZDB-GENE-110913-94]	chr4:35490131-35496720
ENSDART00000051770	1303.29	19501	8839.48	8.06831	17.0901	9881.25	12.5792	9.01597	0.00812013	fam203a	GO:0005488 (binding)	family with sequence similarity 203, member A [Source:ZFIN;Acc:ZDB-GENE-040718-228]	chr19:3351694-3358869
ENSDART00000120674	1283.33	1559.48	984.902	3686.9	4054.59	1275.91	3870.74	-1.62464	0.00813698			ncrna:rRNA chromosome:Zv9:3:6965544:6965658:-1 gene:ENSDARG00000085274 gene_biotype:rRNA transcript_biotype:rRNA	chr3:6965544-6965658
ENSDART00000119128	437.002	540.973	356.749	1027.9	1162.58	444.908	1095.24	-1.31774	0.00817648			ncrna:rRNA chromosome:Zv9:21:28730857:28730957:1 gene:ENSDARG00000083728 gene_biotype:rRNA transcript_biotype:rRNA	chr21:28730857-28730957
ENSDART00000149898	11330.2	29659	9134.08	678.216	913.781	16707.8	795.998	4.20639	0.00817914			cdna:known chromosome:Zv9:2:58850206:58864488:1 gene:ENSDARG00000019553 gene_biotype:protein_coding transcript_biotype:processed_transcript	chr2:58850206-58864488
ENSDART00000155245	1382.07	2247.96	1523.03	378.3	402.003	1717.69	390.152	2.10602	0.00818213	unc45a	GO:0005488 (binding)	unc-45 homolog A (C. elegans) [Source:ZFIN;Acc:ZDB-GENE-050417-158]	chr25:8826203-8888596
ENSDART00000144130	92.0951	145.198	95.6799	4913.43	7974.39	110.991	6443.91	-5.84948	0.00820619			cdna:known chromosome:Zv9:9:24402767:24406074:-1 gene:ENSDARG00000030104 gene_biotype:protein_coding transcript_biotype:retained_intron	chr9:24402767-24406074
ENSDART00000128530	22399.9	18212.6	4308.63	91.509	121.334	14973.7	106.422	6.83961	0.00824771	snrpa1	GO:0008150 (biological_process)	small nuclear ribonucleoprotein polypeptide A' [Source:ZFIN;Acc:ZDB-GENE-041114-82]	chr7:10071551-10086203
ENSDART00000039786	1365.37	2109.31	1434.44	341.845	451.348	1636.37	396.596	2.03032	0.00827283	unc45a	GO:0005488 (binding)	unc-45 homolog A (C. elegans) [Source:ZFIN;Acc:ZDB-GENE-050417-158]	chr25:8826203-8888596
ENSDART00000147136	3753.3	2523.92	3112.28	7777.06	6749.38	3129.83	7263.22	-1.22972	0.00833787	si:ch211-76m11.3	GO:0005515 (protein binding)	si:ch211-76m11.3 [Source:ZFIN;Acc:ZDB-GENE-041210-276]	chr1:37672998-37688847
ENSDART00000026064	30275.4	2857.51	12911.1	2.72324	11.7324	15348	7.2278	10.842	0.00834178	larsb	GO:0002161 (aminoacyl-tRNA editing activity)	leucyl-tRNA synthetase b [Source:ZFIN;Acc:ZDB-GENE-030114-7]	chr21:39677160-39718803
ENSDART00000155116	6516.27	9128.68	1370.33	75.9778	40.2028	5671.76	58.0903	6.29375	0.00834392	im:7152348	GO:0005515 (protein binding)	im:7152348 [Source:ZFIN;Acc:ZDB-GENE-041111-308]	chr6:27592600-27600189
ENSDART00000054353	32.4774	24.17	27.094	12.1264	12.6408	27.9138	12.3836	1.1621	0.00838091		GO:0005515 (protein binding)	WD repeat domain, phosphoinositide interacting 1 [Source:HGNC Symbol;Acc:HGNC:25471]	chr12:1235498-1251201
ENSDART00000081132	7.97387	7.96847	11.1039	2.72066	2.7693	9.0154	2.74498	1.69745	0.00838092	cpt1b	GO:0016740 (transferase activity)	carnitine palmitoyltransferase 1B (muscle) [Source:ZFIN;Acc:ZDB-GENE-041010-9]	chr18:7811523-7832169
ENSDART00000099819	9460.86	8025.67	13550.9	2.86194	5.51792	10345.8	4.18993	11.3109	0.0083827	bcl7ba	GO:0003674 (molecular_function)	B-cell CLL/lymphoma 7B, a [Source:ZFIN;Acc:ZDB-GENE-040426-2193]	chr10:34198947-34279922
ENSDART00000131652	2556.24	3379.75	14011	16.4585	5.03286	6649	10.7457	9.08619	0.0083954	gpr146	GO:0004930 (G-protein coupled receptor activity)	G protein-coupled receptor 146 [Source:ZFIN;Acc:ZDB-GENE-050823-3]	chr3:45725379-45755688
ENSDART00000101070	9088.37	1707.34	9493.56	29.3545	22.6135	6763.09	25.984	7.67938	0.00845576	dachd	GO:0000166 (nucleotide binding)	dachshund d [Source:ZFIN;Acc:ZDB-GENE-070427-2]	chr9:31853598-32096012
ENSDART00000126190	4081.35	23065.8	17982	35.6386	37.6894	15043	36.664	8.34513	0.00848644	dkc1		dyskeratosis congenita 1, dyskerin [Source:ZFIN;Acc:ZDB-GENE-031118-120]	chr21:42107788-42122249
ENSDART00000144211	44613.7	33700.1	25712.6	7445.71	8051.73	34675.5	7748.72	2.12664	0.00849476			cdna:known chromosome:Zv9:21:29145845:29153265:-1 gene:ENSDARG00000069422 gene_biotype:protein_coding transcript_biotype:processed_transcript	chr21:29145845-29153265
ENSDART00000058032	3593.09	321.788	595.24	2.78886	6.33392	1503.37	4.56139	7.71471	0.00850958	fam204a	GO:0003674 (molecular_function)	family with sequence similarity 204, member A [Source:ZFIN;Acc:ZDB-GENE-040718-271]	chr13:19895561-19928489
ENSDART00000113115	47312.8	41564.6	45669.6	18348	16219	44849	17283.5	1.37629	0.00852282	calr	GO:0051082 (unfolded protein binding)	calreticulin [Source:ZFIN;Acc:ZDB-GENE-000208-17]	chr22:4339290-4410265
ENSDART00000032277	5015.91	6494.18	812.625	2.73976	2.64761	4107.57	2.69368	10.1119	0.0085599	ddx51	GO:0016787 (hydrolase activity)	DEAD (Asp-Glu-Ala-Asp) box polypeptide 51 [Source:ZFIN;Acc:ZDB-GENE-040927-28]	chr8:51325955-51350226
ENSDART00000154004	3359.44	1382.46	384.465	2.80566	3.7225	1708.79	3.26408	8.55227	0.00857479	has1	GO:0050501 (hyaluronan synthase activity)	hyaluronan synthase 1 [Source:ZFIN;Acc:ZDB-GENE-040218-2]	chr16:27179658-27185491
ENSDART00000056645	6724.55	16270.9	13732.8	355.645	651.016	12242.7	503.33	4.5731	0.00857822	puf60a	GO:0003676 (nucleic acid binding)	poly-U binding splicing factor a [Source:ZFIN;Acc:ZDB-GENE-030131-2891]	chr2:32371845-32389729
ENSDART00000074173	8.30152	81.426	12.8846	5611.95	2276.91	34.204	3944.43	-7.44078	0.00864122	zp3.2	GO:0003674 (molecular_function)	zona pellucida glycoprotein 3, tandem duplicate 2 [Source:ZFIN;Acc:ZDB-GENE-050626-121]	chr17:2365375-2368214
ENSDART00000139243	292.284	179.708	85.4792	1865.6	3053.97	185.823	2459.78	-3.85487	0.00864773	tlr19	GO:0005515 (protein binding)	toll-like receptor 19 [Source:ZFIN;Acc:ZDB-GENE-040220-3]	chr16:24919595-24927732
ENSDART00000007927	8555.98	14760.8	7875.93	1227.33	1253.66	10397.6	1240.49	3.00853	0.00866127	rbmx	GO:0001047 (core promoter binding)	RNA binding motif protein, X-linked [Source:ZFIN;Acc:ZDB-GENE-030131-579]	chr14:32725471-32732600
ENSDART00000127210	4580.82	3196.24	3276.54	7949.48	9094.52	3684.53	8522	-1.22654	0.00867722			ncrna:rRNA chromosome:Zv9:25:28827984:28828098:1 gene:ENSDARG00000087098 gene_biotype:rRNA transcript_biotype:rRNA	chr25:28827984-28828098
ENSDART00000123001	19799.1	4499.25	1714.66	2.70533	2.82225	8671.01	2.76379	10.9178	0.00867762	ergic1		endoplasmic reticulum-golgi intermediate compartment (ERGIC) 1 [Source:ZFIN;Acc:ZDB-GENE-050913-75]	chr14:19668926-19714971
ENSDART00000146910	9.9817	8.81386	11.5435	4.75129	4.03025	10.113	4.39077	1.19976	0.00870066			cdna:known chromosome:Zv9:10:10694891:10703146:1 gene:ENSDARG00000078492 gene_biotype:protein_coding transcript_biotype:retained_intron	chr10:10694891-10703146
ENSDART00000132604	38.0861	30.5122	24.9865	186.242	257.483	31.1949	221.862	-2.83282	0.00874119	l3mbtl1a	GO:0005515 (protein binding)	l(3)mbt-like 1a (Drosophila) [Source:ZFIN;Acc:ZDB-GENE-090312-120]	chr23:4340061-4370092
ENSDART00000138814	4981.9	1627.94	1380.83	51.9556	63.5922	2663.56	57.7739	5.28255	0.00877979			havana:processed_transcript chromosome:Zv9:19:27949642:27950309:-1 gene:ENSDARG00000095427 gene_biotype:processed_transcript transcript_biotype:retained_intron	chr19:27949642-27950309
ENSDART00000141580	5980.57	7471.86	1068.69	14.8694	11.0835	4840.37	12.9764	8.14268	0.00878872	ddx51	GO:0004386 (helicase activity)	DEAD (Asp-Glu-Ala-Asp) box polypeptide 51 [Source:ZFIN;Acc:ZDB-GENE-040927-28]	chr8:51325955-51350226
ENSDART00000042469	4016.24	1163.84	2747.51	3.15756	8.52231	2642.53	5.83994	8.81838	0.00883184	mrgbp	GO:0043189 (H4/H2A histone acetyltransferase complex)	MRG/MORF4L binding protein [Source:ZFIN;Acc:ZDB-GENE-040426-1698]	chr23:16103079-16119777
ENSDART00000056523	1457.19	2756.41	1813.7	5.49891	2.78856	2009.1	4.14373	8.95142	0.00884124	hkdc1	GO:0019158 (mannokinase activity)	hexokinase domain containing 1 [Source:ZFIN;Acc:ZDB-GENE-030131-9801]	chr13:23157710-23172015
ENSDART00000075759	14071.8	2640.73	3873.86	27.1657	29.6307	6862.11	28.3982	7.52923	0.00888897	maea	GO:0005515 (protein binding)	macrophage erythroblast attacher [Source:ZFIN;Acc:ZDB-GENE-030131-294]	chr14:22125134-22142335
ENSDART00000117249	5.90549	9.31761	8.23071	32.047	32.231	7.81794	32.139	-2.06523	0.008899			ncrna:miRNA chromosome:Zv9:12:28705900:28705998:1 gene:ENSDARG00000082315 gene_biotype:miRNA transcript_biotype:miRNA	chr12:28705900-28705998
ENSDART00000146470	14756.6	23550.1	4850.05	9.01317	29.0843	14385.6	19.0488	9.52167	0.00892629	arpc4l	GO:0005856 (cytoskeleton)	actin related protein 2/3 complex, subunit 4 [Source:ZFIN;Acc:ZDB-GENE-010724-9]	chr6:40692490-40699590
ENSDART00000143853	932.271	3260.66	4833	8.77724	2.73853	3008.64	5.75789	8.9645	0.00894408			cdna:known chromosome:Zv9:13:25759103:25764576:-1 gene:ENSDARG00000055314 gene_biotype:protein_coding transcript_biotype:retained_intron	chr13:25759103-25764576
ENSDART00000064789	28360.4	7018.07	15744.6	560.305	431.389	17041	495.847	4.89555	0.00895635	txn	GO:0015035 (protein disulfide oxidoreductase activity)	thioredoxin [Source:ZFIN;Acc:ZDB-GENE-040718-162]	chr7:25524322-25531917
ENSDART00000139872	5996.68	5309.03	3383.3	19323.4	16583	4896.33	17953.2	-1.91161	0.0089742			havana:lincRNA chromosome:Zv9:13:33484733:33491187:-1 gene:ENSDARG00000093456 gene_biotype:lincRNA transcript_biotype:lincRNA	chr13:33484733-33491187
ENSDART00000152173	11084.6	1210.11	2034.91	2.72152	2.76212	4776.54	2.74182	10.1009	0.00899284	si:ch73-244f7.4	GO:0004252 (serine-type endopeptidase activity)	tripeptidyl peptidase II [Source:HGNC Symbol;Acc:HGNC:12016]	chr1:293560-318456
ENSDART00000020370	25.649	27.8077	28.2313	67.9311	75.6633	27.2293	71.7972	-1.39794	0.00901357	zgc:123107	GO:0005515 (protein binding)	zgc:123107 [Source:ZFIN;Acc:ZDB-GENE-051113-192]	chr4:61887203-61893205
ENSDART00000104113	10735.4	1528.51	6507.2	36.4938	11.8684	6257.05	24.1811	7.83263	0.00902371	btf3l4	GO:0003674 (molecular_function)	basic transcription factor 3-like 4 [Source:ZFIN;Acc:ZDB-GENE-040426-1650]	chr11:13081934-13113736
ENSDART00000150047	54.7333	61.688	24.9366	3151.13	1557.13	47.1193	2354.13	-5.65934	0.0090336	si:ch73-285p12.4	GO:0005525 (GTP binding)	si:ch73-285p12.4 [Source:ZFIN;Acc:ZDB-GENE-110411-145]	chr23:43918961-43925887
ENSDART00000117820	2001.57	2424.8	2810.21	5103.83	5475.31	2412.2	5289.57	-1.1457	0.00904571			ncrna:rRNA chromosome:Zv9:5:47622749:47622866:-1 gene:ENSDARG00000082703 gene_biotype:rRNA transcript_biotype:rRNA	chr5:47622749-47622866
ENSDART00000122561	4918.25	2298.29	553.791	2.70035	3.10913	2590.11	2.90474	9.31299	0.00904983	lsr	GO:0005515 (protein binding)	lipolysis stimulated lipoprotein receptor [Source:ZFIN;Acc:ZDB-GENE-050913-73]	chr15:31909604-31935461
ENSDART00000131890	1721.16	18066.1	7028.86	5.80375	6.75282	8938.69	6.27828	9.91018	0.00909472	lifrb	GO:0005515 (protein binding)	leukemia inhibitory factor receptor alpha b [Source:ZFIN;Acc:ZDB-GENE-080107-2]	chr21:20071945-20089326
ENSDART00000130507	5.40114	4.64063	2.97569	16.71	18.9748	4.33915	17.8424	-2.08072	0.00914605	aida	GO:0003674 (molecular_function)	axin interaction partner and dorsalization antagonist [Source:ZFIN;Acc:ZDB-GENE-071126-2]	chr20:52069511-52286030
ENSDART00000043462	7609.15	16878.5	1190.78	4.73834	3.34716	8559.49	4.04275	10.391	0.00915523	acvrl1	GO:0016740 (transferase activity)	activin A receptor type II-like 1 [Source:ZFIN;Acc:ZDB-GENE-021003-1]	chr23:28076284-28097741
GENSCAN00000021259	62.3285	71.883	31.4655	690.29	652.799	55.2257	671.544	-3.68908	0.00915957			cdna:genscan chromosome:Zv9:2:47480749:47481279:-1 transcript_biotype:protein_coding	chr2:47480749-47481279
ENSDART00000035545	16991.1	21213.9	28423.7	5785.32	7413.44	22209.6	6599.38	1.72962	0.00916924	prmt1	GO:0008276 (protein methyltransferase activity)	protein arginine methyltransferase 1 [Source:ZFIN;Acc:ZDB-GENE-030131-693]	chr3:32493809-32499997
ENSDART00000026107	5503.1	7823.63	580.313	8.77027	4.31942	4635.68	6.54485	8.89172	0.00919017	tnc	GO:0005515 (protein binding)	tenascin C [Source:ZFIN;Acc:ZDB-GENE-980526-104]	chr5:30199064-30263575
ENSDART00000115157	11030.7	11748.2	14809.2	5854.88	5573	12529.3	5713.94	1.12136	0.009196	tuba4l	GO:0005200 (structural constituent of cytoskeleton)	tubulin, alpha 4 like [Source:ZFIN;Acc:ZDB-GENE-030131-5588]	chr13:6285077-6290337
ENSDART00000079902	1364.03	4661.83	593.078	4.49294	3.8589	2206.31	4.17592	8.54622	0.0092088	slc25a16	GO:0005743 (mitochondrial inner membrane)	solute carrier family 25, member 16 [Source:ZFIN;Acc:ZDB-GENE-030131-3299]	chr13:18228069-18244915
ENSDART00000134284	77.8786	25.9353	120.525	6215.22	5583.05	74.7796	5899.14	-6.55982	0.00921965			cdna:known chromosome:Zv9:18:39861089:39862823:1 gene:ENSDARG00000055124 gene_biotype:protein_coding transcript_biotype:retained_intron	chr18:39861089-39862823
ENSDART00000048843	6696.08	45117.4	13838.1	56.7322	63.1674	21883.8	59.9498	8.07202	0.00923044	supt4h1	GO:0046872 (metal ion binding)	suppressor of Ty 4 homolog 1 (S. cerevisiae) [Source:ZFIN;Acc:ZDB-GENE-040718-214]	chr5:3104821-3113670
ENSDART00000135720	3458.73	6097.51	9578	546.892	829.228	6378.08	688.06	3.12314	0.00926922	max	GO:0046983 (protein dimerization activity)	myc-associated factor X [Source:ZFIN;Acc:ZDB-GENE-990415-152]	chr20:28858670-28868512
ENSDART00000091873	1696.16	262.019	2855.1	8.36501	2.89468	1604.43	5.62985	7.78142	0.00928817	crebbpb	GO:0005515 (protein binding)	CREB binding protein b [Source:ZFIN;Acc:ZDB-GENE-050302-102]	chr3:9981872-10065491
ENSDART00000015979	15095.7	3214	924.531	2.75715	4.34944	6411.42	3.55329	10.0029	0.00929128	farsb	GO:0004826 (phenylalanine-tRNA ligase activity)	phenylalanyl-tRNA synthetase, beta subunit [Source:ZFIN;Acc:ZDB-GENE-021206-2]	chr15:40792143-40811082
ENSDART00000042694	2108.82	930.89	307.711	11.2362	19.9539	1115.81	15.5951	5.81903	0.00930672	mapre3b	GO:0005515 (protein binding)	microtubule-associated protein, RP/EB family, member 3b [Source:ZFIN;Acc:ZDB-GENE-040704-6]	chr4:492034-496267
ENSDART00000027428	33.672	46.7165	49.1534	18.25	14.9901	43.1806	16.62	1.36497	0.00932644	chuk	GO:0008384 (IkappaB kinase activity)	conserved helix-loop-helix ubiquitous kinase [Source:ZFIN;Acc:ZDB-GENE-040426-1069]	chr13:25588643-25603530
ENSDART00000151639	6.59685	20.7429	9.39535	353.501	345.874	12.245	349.687	-5.00708	0.00933306	unc119.2		unc-119 homolog 2 [Source:ZFIN;Acc:ZDB-GENE-030131-7635]	chr3:32731333-32756610
ENSDART00000080413	13239.4	11061	6938.37	1397.75	1426.51	10412.9	1412.13	2.83179	0.00933461	srsf1a	GO:0000166 (nucleotide binding)	serine/arginine-rich splicing factor 1a [Source:ZFIN;Acc:ZDB-GENE-040426-1950]	chr15:15091095-15095533
ENSDART00000113111	3045.78	3016.57	464.26	2.65614	2.8158	2175.54	2.73597	9.21192	0.00934054	psmb5	GO:0008233 (peptidase activity)	proteasome (prosome, macropain) subunit, beta type, 5 [Source:ZFIN;Acc:ZDB-GENE-990415-215]	chr2:38076030-38095333
ENSDART00000020740	19725.9	4332.83	1578.43	2.73626	2.80764	8545.72	2.77195	10.8536	0.0093663	ergic1		endoplasmic reticulum-golgi intermediate compartment (ERGIC) 1 [Source:ZFIN;Acc:ZDB-GENE-050913-75]	chr14:19668926-19714971
ENSDART00000129621	17.498	33.1066	20.7181	87.8692	119.943	23.7742	103.906	-2.16475	0.00938031	si:ch73-322b17.4	GO:0005515 (protein binding)	si:ch73-322b17.4 [Source:ZFIN;Acc:ZDB-GENE-131121-87]	chr16:24012179-24014604
ENSDART00000023867	1508.99	546.969	4700.82	2.69758	2.73899	2252.26	2.71829	9.17514	0.00940126	lsg1	GO:0005525 (GTP binding)	large subunit GTPase 1 homolog (S. cerevisiae) [Source:ZFIN;Acc:ZDB-GENE-030131-2184]	chr11:35028904-35041579
ENSDART00000136394	3051.19	37375.3	10653.4	8.49187	10.2948	17026.6	9.39333	10.1564	0.00943618			cdna:known chromosome:Zv9:23:3771531:3773178:-1 gene:ENSDARG00000028335 gene_biotype:protein_coding transcript_biotype:retained_intron	chr23:3771531-3773178
ENSDART00000137080	38.3037	90.2851	23.8927	1216.87	2645.37	50.8272	1931.12	-5.36433	0.00944949	tmem176l.3a	GO:0016021 (integral component of membrane)	transmembrane protein 176l.3a [Source:ZFIN;Acc:ZDB-GENE-080829-13]	chr16:49679198-49706477
ENSDART00000102584	24676.8	19630.6	4363.49	95.1163	124.921	16223.6	110.019	6.8794	0.00947026	snrpa1		small nuclear ribonucleoprotein polypeptide A' [Source:ZFIN;Acc:ZDB-GENE-041114-82]	chr7:10071551-10086203
GENSCAN00000031090	3.13441	3.61313	23.2135	4562.53	4555.58	9.98701	4559.06	-9.47507	0.00950901			cdna:genscan chromosome:Zv9:3:50363732:50373605:1 transcript_biotype:protein_coding	chr3:50363732-50373605
GENSCAN00000016943	14644.2	13305.8	18809.1	34165.9	30043	15586.4	32104.4	-1.05519	0.00954788			cdna:genscan chromosome:Zv9:4:31208591:31213145:1 transcript_biotype:protein_coding	chr4:31208591-31213145
ENSDART00000124862	91.7555	90.1123	90.4004	1226.29	1340.58	90.7561	1283.44	-3.82049	0.00955947	smyhc2	GO:0003774 (motor activity)	slow myosin heavy chain 2 [Source:ZFIN;Acc:ZDB-GENE-070822-12]	chr24:42264601-42285123
ENSDART00000139684	255.558	964.143	1090.18	6.37919	7.04248	769.961	6.71084	6.58893	0.00956441	lypla2	GO:0016787 (hydrolase activity)	lysophospholipase II [Source:ZFIN;Acc:ZDB-GENE-040426-1715]	chr19:45390325-45408752
ENSDART00000114769	1419.14	1203.13	965.015	2782.87	2482.3	1195.76	2632.58	-1.15398	0.0095865	si:dkey-7k24.5	GO:0030247 (polysaccharide binding)	somatomedin B and thrombospondin, type 1 domain containing [Source:HGNC Symbol;Acc:HGNC:30362]	chr6:46418208-46431268
ENSDART00000129594	249.227	53.1446	199.146	5.78038	2.89008	167.172	4.33523	5.07915	0.00959337			cdna:known chromosome:Zv9:16:33044209:33078484:-1 gene:ENSDARG00000004672 gene_biotype:protein_coding transcript_biotype:processed_transcript	chr16:33044209-33078484
ENSDART00000037182	12.9612	55.6401	3.62924	7237.35	11733.5	24.0768	9485.41	-9.38518	0.00964161	ankrd44	GO:0005515 (protein binding)	ankyrin repeat domain 44 [Source:ZFIN;Acc:ZDB-GENE-070912-605]	chr9:33139641-33191596
ENSDART00000088026	19037.8	27896.4	22391.8	91.123	55.5198	23108.7	73.3214	8.32601	0.00968202	prmt5	GO:0008757 (S-adenosylmethionine-dependent methyltransferase activity)	protein arginine methyltransferase 5 [Source:ZFIN;Acc:ZDB-GENE-030616-585]	chr2:38045045-38065775
ENSDART00000148763	27.4025	16.0128	13.2533	99.2751	73.6394	18.8895	86.4572	-2.24933	0.00970548	zgc:112484	GO:0016746 (transferase activity, transferring acyl groups)	zgc:112484 [Source:ZFIN;Acc:ZDB-GENE-050417-155]	chr3:32362282-32427072
ENSDART00000113397	217.785	100.528	251.273	1615.56	1252.2	189.862	1433.88	-3.01026	0.00973927		GO:0005515 (protein binding)	Uncharacterized protein [Source:UniProtKB/TrEMBL;Acc:E7F545]	chr2:36318046-36319659
ENSDART00000103722	11.4659	10.4629	13.2254	5.16383	5.99997	11.7181	5.5819	1.06721	0.00974023	lyplal1	GO:0016787 (hydrolase activity)	lysophospholipase-like 1 [Source:ZFIN;Acc:ZDB-GENE-050306-32]	chr16:3241436-3254333
ENSDART00000051014	10.2091	3.10743	5.25722	1822.97	724.757	6.19127	1273.87	-7.70611	0.00976724			cdna:novel chromosome:Zv9:5:63584535:63622800:-1 gene:ENSDARG00000035215 gene_biotype:protein_coding transcript_biotype:processed_transcript	chr5:63584535-63622800
ENSDART00000066892	11.6891	7.84163	13.472	3.60215	2.79835	11.0009	3.20025	1.75666	0.00983335	stk38l	GO:0016740 (transferase activity)	serine/threonine kinase 38 like [Source:ZFIN;Acc:ZDB-GENE-040426-798]	chr4:19159789-19171594
ENSDART00000154778	4079.3	467.508	1900.01	2.69417	2.70722	2148.94	2.7007	9.15159	0.00985123	map1ab		microtubule-associated protein 1Ab [Source:ZFIN;Acc:ZDB-GENE-100426-3]	chr25:19846659-19923316
ENSDART00000138763	7.64905	2.79509	2.76399	363.894	163.152	4.40271	263.523	-5.96708	0.00988153	dnajb9a		DnaJ (Hsp40) homolog, subfamily B, member 9a [Source:ZFIN;Acc:ZDB-GENE-050626-115]	chr25:20753337-20759584
ENSDART00000023803	693.461	6966.33	1009.7	2.77955	3.88552	2889.83	3.33253	9.01138	0.00988654	c1d		C1D nuclear receptor co-repressor [Source:ZFIN;Acc:ZDB-GENE-041024-8]	chr13:4311924-4318911
ENSDART00000112730	11412.1	1197.34	1883.15	3.15955	3.4315	4830.87	3.29552	9.80833	0.00990138	si:ch73-244f7.4	GO:0004252 (serine-type endopeptidase activity)	tripeptidyl peptidase II [Source:HGNC Symbol;Acc:HGNC:12016]	chr1:293560-318456
ENSDART00000150478	317.04	506.42	213.592	3831.79	2375.67	345.684	3103.73	-3.21515	0.00990318	si:ch211-161n3.4	GO:0005044 (scavenger receptor activity)	si:ch211-161n3.4 [Source:ZFIN;Acc:ZDB-GENE-110913-46]	chr4:10000992-10022598
ENSDART00000105644	9691.96	2056.75	1870.82	59.6246	111.119	4539.85	85.3716	5.35917	0.00995818	uchl5	GO:0008242 (omega peptidase activity)	ubiquitin carboxyl-terminal hydrolase L5 [Source:ZFIN;Acc:ZDB-GENE-040426-2051]	chr22:23574564-23582944
ENSDART00000007308	31649.2	1240.68	6485.77	3.09952	5.97939	13125.2	4.53946	10.5239	0.00997592	wnt10a	GO:0005102 (receptor binding)	wingless-type MMTV integration site family, member 10a [Source:ZFIN;Acc:ZDB-GENE-990415-278]	chr9:11656091-11685923
ENSDART00000131365	43.9722	103.854	252.796	9343.63	7338.25	133.541	8340.94	-6.30257	0.0100039	rbm39a		RNA binding motif protein 39a [Source:ZFIN;Acc:ZDB-GENE-040426-2852]	chr11:25272921-25278982
ENSDART00000110611	129.882	104.841	120.344	60.2719	52.0394	118.356	56.1556	1.07391	0.0100261	si:ch73-248e21.6	GO:0008237 (metallopeptidase activity)		chr3:32757551-32766465
ENSDART00000141748	1222.53	1014.4	805.275	2678.89	2225.57	1014.07	2452.23	-1.28856	0.0100486			cdna:known chromosome:Zv9:13:35742566:35748997:-1 gene:ENSDARG00000010823 gene_biotype:protein_coding transcript_biotype:retained_intron	chr13:35742566-35748997
ENSDART00000114137	81.863	32.2217	18.4589	1235.69	1563.07	44.1812	1399.38	-5.25019	0.0100655	sh3yl1	GO:0005515 (protein binding)	SH3 domain containing, Ysc84-like 1 (S. cerevisiae) [Source:ZFIN;Acc:ZDB-GENE-040128-16]	chr17:30663929-30711848
GENSCAN00000018106	2141.22	2438.08	3480.28	9394.43	8731.22	2686.53	9062.82	-1.78453	0.0100753			cdna:genscan scaffold:Zv9:Zv9_NA679:18663:19212:1 transcript_biotype:protein_coding
ENSDART00000017755	2.80561	2.81571	2.8074	2050.83	2537.26	2.80957	2294.05	-9.66518	0.0101037	ubxn6	GO:0005515 (protein binding)	UBX domain protein 6 [Source:ZFIN;Acc:ZDB-GENE-030131-5680]	chr22:22623596-22637779
ENSDART00000134021	4721.3	1636.18	2543.93	164.486	284.334	2967.14	224.41	3.64134	0.0101214			havana:lincRNA chromosome:Zv9:1:6993874:6996630:1 gene:ENSDARG00000095344 gene_biotype:lincRNA transcript_biotype:lincRNA	chr1:6993874-6996630
ENSDART00000105808	35783.8	30123.3	23223.3	7386.27	5477.16	29710.1	6431.71	2.20138	0.0101359	zgc:92061	GO:0005198 (structural molecule activity)	zgc:92061 [Source:ZFIN;Acc:ZDB-GENE-040718-78]	chr22:11866190-11869256
ENSDART00000091512	19251.7	10666.3	9288.45	2059.8	2422.23	13068.8	2241.01	2.47303	0.0101493	cmip		c-Maf inducing protein [Source:ZFIN;Acc:ZDB-GENE-050419-50]	chr18:12800816-12836782
ENSDART00000144613	6327.28	16250.3	13776.2	355.826	677.511	12117.9	516.668	4.51558	0.0101528	puf60a	GO:0000166 (nucleotide binding)	poly-U binding splicing factor a [Source:ZFIN;Acc:ZDB-GENE-030131-2891]	chr2:32371845-32389729
ENSDART00000149336	25515.3	7475.4	6330.74	111.894	270.491	13107.2	191.192	5.93568	0.0101649	foxk2		forkhead box K2 [Source:ZFIN;Acc:ZDB-GENE-030131-2861]	chr12:276711-286613
ENSDART00000131098	786.107	1649.4	573.254	17440.2	18613.4	1002.92	18026.8	-4.31398	0.0101803	zgc:171719	GO:0003674 (molecular_function)	tropomyosin 1 (alpha) [Source:HGNC Symbol;Acc:HGNC:12010]	chr25:33891094-33948552
ENSDART00000101037	45888.1	32309.7	27347.1	8430.31	8906.64	35181.7	8668.47	1.98719	0.0102215	nhp2	GO:0030515 (snoRNA binding)	NHP2 ribonucleoprotein homolog (yeast) [Source:ZFIN;Acc:ZDB-GENE-030131-533]	chr21:29145845-29153265
ENSDART00000139793	91.5059	240.549	305.431	3019.03	1917.96	212.495	2468.49	-3.67239	0.0102287			havana:sense_intronic chromosome:Zv9:4:5294155:5294719:1 gene:ENSDARG00000094254 gene_biotype:sense_intronic transcript_biotype:sense_intronic	chr4:5294155-5294719
ENSDART00000041988	36.8694	25.2698	31.572	72.9672	62.343	31.2371	67.6551	-1.12758	0.0102447	slc34a1a	GO:0015321 (sodium-dependent phosphate transmembrane transporter activity)	solute carrier family 34 (sodium phosphate), member 1a [Source:ZFIN;Acc:ZDB-GENE-101006-3]	chr14:835780-858120
ENSDART00000129073	32.6174	12.3925	26.5198	215.564	142.62	23.8432	179.092	-2.99135	0.01036			Uncharacterized protein [Source:UniProtKB/TrEMBL;Acc:E7F328]	chr16:1611611-1623456
GENSCAN00000019741	3.5766	4.27743	2.94911	7.08356	8.28185	3.60105	7.6827	-1.10534	0.0103723			cdna:genscan chromosome:Zv9:21:19855462:20006265:-1 transcript_biotype:protein_coding	chr21:19855462-20006265
ENSDART00000074883	198.394	596.746	104.454	7959.45	18879.6	299.865	13419.5	-5.72819	0.0103994	arhgap23a	GO:0005515 (protein binding)	Rho GTPase activating protein 23a [Source:ZFIN;Acc:ZDB-GENE-121019-1]	chr3:39307876-39366916
ENSDART00000092256	8394.51	5618.88	461.602	6.94096	2.98585	4825	4.96341	9.26063	0.0104244	mrpl9	GO:0003735 (structural constituent of ribosome)	mitochondrial ribosomal protein L9 [Source:ZFIN;Acc:ZDB-GENE-070717-4]	chr19:8140840-8148124
ENSDART00000130370	17.5186	21.0252	8.51049	943.065	2044.97	15.6848	1494.02	-6.56817	0.0104524	poldip2	GO:0005515 (protein binding)	polymerase (DNA-directed), delta interacting protein 2 [Source:ZFIN;Acc:ZDB-GENE-030131-5881]	chr15:23997836-24043808
ENSDART00000148883	6.26874	6.31292	5.68647	2.69514	3.0048	6.08938	2.84997	1.09586	0.0104868	si:dkey-22i16.9	GO:0005515 (protein binding)	si:dkey-22i16.9 [Source:ZFIN;Acc:ZDB-GENE-090313-261]	chr1:44356400-44365925
ENSDART00000135858	6.51414	7.15235	113.528	12043.2	25209.7	42.3983	18626.4	-9.96584	0.0105305			cdna:known chromosome:Zv9:21:10048306:10056515:-1 gene:ENSDARG00000058693 gene_biotype:protein_coding transcript_biotype:retained_intron	chr21:10048306-10056515
ENSDART00000108552	2953.99	2114.3	3117.79	2.78682	4.91461	2728.69	3.85071	9.50573	0.0105319	lemd3	GO:0005639 (integral component of nuclear inner membrane)	LEM domain containing 3 [Source:ZFIN;Acc:ZDB-GENE-030131-490]	chr4:11980752-11994610
ENSDART00000100156	6374.84	12848.8	1461.99	31.0202	21.9262	6895.21	26.4732	7.56222	0.0105852	agpat4	GO:0016740 (transferase activity)	1-acylglycerol-3-phosphate O-acyltransferase 4 (lysophosphatidic acid acyltransferase, delta) [Source:ZFIN;Acc:ZDB-GENE-040426-1924]	chr13:36166809-36189709
ENSDART00000156520	2377.54	17514.2	1444.27	2.7129	3.07735	7112.02	2.89512	10.4051	0.0105921			cdna:known_by_projection chromosome:Zv9:17:14630727:14635759:1 gene:ENSDARG00000009253 gene_biotype:protein_coding transcript_biotype:retained_intron	chr17:14630727-14635759
ENSDART00000121122	2617.58	1797.56	2355.09	5291.21	5648.89	2256.74	5470.05	-1.2941	0.0106021			ncrna:rRNA chromosome:Zv9:2:6470817:6470931:-1 gene:ENSDARG00000085722 gene_biotype:rRNA transcript_biotype:rRNA	chr2:6470817-6470931
ENSDART00000130609	5576.2	7562.78	8355.3	18341.4	15335.2	7164.76	16838.3	-1.2476	0.0106131	runx2b	GO:0003700 (sequence-specific DNA binding transcription factor activity)	runt-related transcription factor 2b [Source:ZFIN;Acc:ZDB-GENE-040629-4]	chr20:44022921-44126740
ENSDART00000122257	3.85868	4.72185	2.95824	10.4304	8.7519	3.84625	9.59116	-1.33876	0.010625	eomesa	GO:0005515 (protein binding)	eomesodermin homolog a [Source:ZFIN;Acc:ZDB-GENE-001228-1]	chr19:839729-853794
ENSDART00000148454	4114.77	2235.14	5459.57	299.317	293.024	3936.49	296.171	3.6389	0.0106443	itgb1b.1	GO:0004872 (receptor activity)	integrin, beta 1b.1 [Source:ZFIN;Acc:ZDB-GENE-060803-3]	chr2:43687135-43704034
ENSDART00000149278	374.513	247.005	302.442	124.303	139.74	307.987	132.021	1.20377	0.010651			cdna:known chromosome:Zv9:19:44675588:44682573:1 gene:ENSDARG00000023145 gene_biotype:protein_coding transcript_biotype:retained_intron	chr19:44675588-44682573
ENSDART00000156865	53.674	150.292	38.308	1363.31	1803.97	80.7581	1583.64	-4.53581	0.0106859			havana:lincRNA chromosome:Zv9:24:23298931:23309546:-1 gene:ENSDARG00000097983 gene_biotype:lincRNA transcript_biotype:lincRNA	chr24:23298931-23309546
ENSDART00000136018	5059.04	2631.74	1464.58	99.0153	92.2134	3051.79	95.6144	4.816	0.0107272	nsun4	GO:0003674 (molecular_function)	NOL1/NOP2/Sun domain family, member 4 [Source:ZFIN;Acc:ZDB-GENE-041212-77]	chr2:9949381-9958330
ENSDART00000005015	4947.62	1929.05	1748.98	7.96847	2.9409	2875.21	5.45468	9.04422	0.0107799	prkcbp1l	GO:0005515 (protein binding)	protein kinase C binding protein 1, like [Source:ZFIN;Acc:ZDB-GENE-030131-2199]	chr23:9916429-9970412
ENSDART00000087112	16933.2	10695.5	11318.2	5.43475	2.72485	12982.3	4.0798	11.6887	0.0107949	pfdn4	GO:0051082 (unfolded protein binding)	prefoldin subunit 4 [Source:ZFIN;Acc:ZDB-GENE-100922-122]	chr23:38244618-38253249
ENSDART00000153782	6.47026	8.26413	5.97238	2.72413	2.77333	6.90226	2.74873	1.31429	0.010808			cdna:known chromosome:Zv9:3:56945540:56957750:1 gene:ENSDARG00000086628 gene_biotype:protein_coding transcript_biotype:retained_intron	chr3:56945540-56957750
ENSDART00000130042	20602.1	15326.9	2433.39	3.23728	14.5995	12787.5	8.91837	10.3797	0.0108422		GO:0003723 (RNA binding)	Uncharacterized protein [Source:UniProtKB/TrEMBL;Acc:E7EYA8]	chr5:1219724-1227129
ENSDART00000148818	21631	18329.4	3856.45	96.6193	123.004	14605.6	109.812	6.72351	0.0108431			cdna:known chromosome:Zv9:7:10080262:10086203:1 gene:ENSDARG00000024651 gene_biotype:protein_coding transcript_biotype:retained_intron	chr7:10080262-10086203
GENSCAN00000005493	72.9497	80.4346	42.8949	228.733	313.242	65.4264	270.987	-2.08389	0.0108588			cdna:genscan chromosome:Zv9:12:5890216:5890746:-1 transcript_biotype:protein_coding	chr12:5890216-5890746
ENSDART00000123780	37470.1	33956.4	12218.1	340.8	767.576	27881.6	554.188	5.60872	0.0108635		GO:0004386 (helicase activity)	DEAD (Asp-Glu-Ala-Asp) box polypeptide 47 [Source:HGNC Symbol;Acc:HGNC:18682]	chr3:2139248-2139927
ENSDART00000114432	6.44137	7.65294	5.49891	2.94246	2.82164	6.53107	2.88205	1.1674	0.0108651	ntng2a	GO:0005515 (protein binding)	netrin g2a [Source:ZFIN;Acc:ZDB-GENE-081105-186]	chr8:12510659-12630187
ENSDART00000125768	335.145	496.439	1053.51	4401.7	6619.11	628.364	5510.41	-3.26977	0.0109016	si:dkey-247i3.4	GO:0046872 (metal ion binding)	si:dkey-247i3.4 [Source:ZFIN;Acc:ZDB-GENE-110913-80]	chr4:31359610-31367290
ENSDART00000111763	240.616	173.275	246.521	619.853	632.152	220.137	626.002	-1.5256	0.0109193	six6a	GO:0043565 (sequence-specific DNA binding)	sine oculis-related homeobox 6a [Source:ZFIN;Acc:ZDB-GENE-040426-1282]	chr13:31806636-31829849
ENSDART00000139126	1423.42	2827.48	2099.08	8771.56	7214.07	2116.66	7992.82	-1.96561	0.0109502	si:dkey-15h8.6	GO:0046872 (metal ion binding)	si:dkey-15h8.6 [Source:ZFIN;Acc:ZDB-GENE-050208-623]	chr22:3016401-3019664
ENSDART00000121680	814.543	1709.67	582.166	17670.2	18538.2	1035.46	18104.2	-4.27874	0.0109802	zgc:171719		tropomyosin 1 (alpha) [Source:HGNC Symbol;Acc:HGNC:12010]	chr25:33891094-33948552
ENSDART00000148393	1531.86	11916.3	13082.1	17.1666	13.0812	8843.42	15.1239	8.69353	0.0110199	tpra	GO:0005643 (nuclear pore)	translocated promoter region a (to activated MET oncogene) [Source:ZFIN;Acc:ZDB-GENE-081104-2]	chr2:20584192-20662758
ENSDART00000153940	2.74416	2.75798	2.75773	4800.42	3721.89	2.75329	4261.16	-10.5842	0.0110263	ptprjb	GO:0016791 (phosphatase activity)	protein tyrosine phosphatase, receptor type, J b [Source:ZFIN;Acc:ZDB-GENE-090304-1]	chr25:24003559-24019863
GENSCAN00000031815	16.4547	115.527	30.4369	4189.36	2979.15	54.1397	3584.25	-6.51317	0.0110266			cdna:genscan chromosome:Zv9:22:31003247:31031811:1 transcript_biotype:protein_coding	chr22:31003247-31031811
ENSDART00000111995	82.6272	75.5791	942.308	78177.9	35222.7	366.838	56700.3	-8.18317	0.0110415	si:dkey-238o13.4		si:dkey-238o13.4 [Source:ZFIN;Acc:ZDB-GENE-070705-403]	chr18:14257859-14264006
ENSDART00000020344	15705.8	5017.45	1655.2	31.1379	83.0091	7459.47	57.0735	6.64028	0.0110606	zgc:86598	GO:0004674 (protein serine/threonine kinase activity)	zgc:86598 [Source:ZFIN;Acc:ZDB-GENE-040625-181]	chr19:3697800-3795238
ENSDART00000009920	8.90976	45.4736	48.1337	18234.8	5246.35	34.1724	11740.6	-8.50531	0.0110718	lmo7a	GO:0005515 (protein binding)	LIM domain only 7a [Source:ZFIN;Acc:ZDB-GENE-030219-74]	chr9:22927102-23003412
ENSDART00000148633	4211.42	2167.87	5140.86	320.241	311.299	3840.05	315.77	3.51406	0.0111115	itgb1b.1	GO:0004872 (receptor activity)	integrin, beta 1b.1 [Source:ZFIN;Acc:ZDB-GENE-060803-3]	chr2:43687135-43704034
ENSDART00000055713	3.70594	4.9203	6.80014	20.7292	22.4156	5.14213	21.5724	-2.11196	0.0111563		GO:0004888 (transmembrane signaling receptor activity)	corticotropin releasing hormone receptor 2 [Source:HGNC Symbol;Acc:HGNC:2358]	chr2:2681130-2785846
ENSDART00000134063	366.15	285.09	280.422	805.275	667.609	310.554	736.442	-1.25043	0.0111765			havana:lincRNA chromosome:Zv9:12:24877170:25008335:1 gene:ENSDARG00000092599 gene_biotype:lincRNA transcript_biotype:lincRNA	chr12:24877170-25008335
ENSDART00000004474	36358.9	22714.4	28725.3	8044.05	8080.25	29266.2	8062.15	1.83351	0.01121	mapre1b	GO:0005515 (protein binding)	microtubule-associated protein, RP/EB family, member 1b [Source:ZFIN;Acc:ZDB-GENE-040426-2256]	chr23:9901568-9914536
ENSDART00000111936	13.0117	7.88767	13.0841	2.78349	3.05253	11.3278	2.91801	1.92024	0.0112485	stac3	GO:0005515 (protein binding)	SH3 and cysteine rich domain 3 [Source:ZFIN;Acc:ZDB-GENE-040801-248]	chr9:164630-176280
ENSDART00000015224	147.52	73.3935	434.794	2.89882	6.38414	218.569	4.64148	5.28387	0.0112609	zgc:85869	GO:0003674 (molecular_function)	growth arrest and DNA-damage-inducible, gamma [Source:HGNC Symbol;Acc:HGNC:4097]	chr21:19542895-19544436
ENSDART00000141252	18.687	15.8431	25.6451	56.9449	46.7321	20.0584	51.8385	-1.39213	0.0112758	katnbl1		katanin p80 subunit B-like 1 [Source:ZFIN;Acc:ZDB-GENE-030131-4155]	chr20:29235523-29242144
ENSDART00000052359	382.753	7663.23	2489.21	2.82869	5.77483	3511.73	4.30176	8.90687	0.0113926	gtf2h4	GO:0004003 (ATP-dependent DNA helicase activity)	general transcription factor IIH, polypeptide 4 [Source:ZFIN;Acc:ZDB-GENE-030131-6779]	chr19:27802132-27820059
ENSDART00000135418	11.7917	17.9386	16.6182	54.0128	41.7945	15.4495	47.9036	-1.64377	0.0114082	adcy9	GO:0016849 (phosphorus-oxygen lyase activity)	adenylate cyclase 9 [Source:ZFIN;Acc:ZDB-GENE-050208-455]	chr22:27256103-27323634
ENSDART00000157340	54.8577	77.7354	36.7575	14.6378	11.3037	56.4502	12.9708	2.06752	0.0114431	si:dkey-28g23.4	GO:0005515 (protein binding)	spectrin, beta, non-erythrocytic 5 [Source:HGNC Symbol;Acc:HGNC:15680]	chr17:29183231-29253329
ENSDART00000065555	2352.22	2077.42	1125.28	3.13124	6.96923	1851.64	5.05024	8.56162	0.0114983	birc2	GO:0005515 (protein binding)	baculoviral IAP repeat-containing 2 [Source:ZFIN;Acc:ZDB-GENE-030825-6]	chr21:21948887-21966212
ENSDART00000121112	125.254	78.2459	65.6653	277.364	344.591	89.7218	310.977	-1.84028	0.0115022			ncrna:rRNA chromosome:Zv9:23:36924201:36924317:-1 gene:ENSDARG00000085712 gene_biotype:rRNA transcript_biotype:rRNA	chr23:36924201-36924317
ENSDART00000137520	1405.17	2811.35	2128.7	8859.65	7391.41	2115.07	8125.53	-1.99256	0.011532	zgc:162358	GO:0046872 (metal ion binding)	zgc:162358 [Source:ZFIN;Acc:ZDB-GENE-070424-89]	chr22:1526012-1532693
ENSDART00000126015	706.621	963.943	919.149	2849.01	3672.2	863.238	3260.61	-1.91875	0.0115367	etv5a	GO:0043565 (sequence-specific DNA binding)	ets variant 5a [Source:ZFIN;Acc:ZDB-GENE-030131-9572]	chr9:23665132-23682366
ENSDART00000144220	7.43705	6.75223	10.151	2.75786	2.88899	8.11342	2.82342	1.50082	0.0115466	si:dkey-52k20.13	GO:0016020 (membrane)	si:dkey-52k20.13 [Source:ZFIN;Acc:ZDB-GENE-070912-550]	chr2:36857495-36861256
ENSDART00000109735	632.152	646.68	534.001	1503.68	1282.45	604.278	1393.06	-1.20557	0.0115468	si:ch1073-287p18.1		chromosome 8 open reading frame 82 [Source:HGNC Symbol;Acc:HGNC:33826]	chr20:52672610-52678448
ENSDART00000113480	87.7395	28.5609	11.4371	6594.44	5957.45	42.5792	6275.95	-7.67817	0.011576	irx3a	GO:0043565 (sequence-specific DNA binding)	iroquois homeobox protein 3a [Source:ZFIN;Acc:ZDB-GENE-991119-5]	chr7:35811114-35814431
ENSDART00000143810	2.85885	2.79408	2.69735	10.4677	9.52117	2.78343	9.99445	-1.84306	0.0115802	taf6	GO:0005488 (binding)	TAF6 RNA polymerase II, TATA box binding protein (TBP)-associated factor [Source:ZFIN;Acc:ZDB-GENE-040912-23]	chr5:63685823-63769955
ENSDART00000149379	8646.12	8156.08	954.24	11.6151	8.5543	5918.82	10.0847	8.67261	0.0115816			cdna:known chromosome:Zv9:5:69808452:69811171:-1 gene:ENSDARG00000004906 gene_biotype:protein_coding transcript_biotype:retained_intron	chr5:69808452-69811171
ENSDART00000114501	7957.38	638.093	12884.2	15.1212	4.47162	7159.88	9.79639	8.93669	0.0116134	polr1a	GO:0003899 (DNA-directed RNA polymerase activity)	polymerase (RNA) I polypeptide A [Source:ZFIN;Acc:ZDB-GENE-030131-5286]	chr14:20081338-20140596
ENSDART00000116512	2.93912	22.2485	2.84209	1467.81	477.667	9.34325	972.738	-7.197	0.0116356			ncrna:miRNA chromosome:Zv9:15:25232253:25232346:1 gene:ENSDARG00000080565 gene_biotype:miRNA transcript_biotype:miRNA	chr15:25232253-25232346
ENSDART00000100494	5250.58	897.996	1067.11	30.025	21.006	2405.23	25.5155	6.09236	0.011661	si:dkey-242h9.3		si:dkey-242h9.3 [Source:ZFIN;Acc:ZDB-GENE-060503-347]	chr18:18901695-18908992
ENSDART00000062917	4236.3	11720.4	2223.19	183.999	127.009	6059.97	155.504	4.97175	0.0116679	cx35.4	GO:0005921 (gap junction)	connexin 35.4 [Source:ZFIN;Acc:ZDB-GENE-050417-174]	chr17:24677133-24682075
ENSDART00000151786	51.6635	46.5636	35.723	101.518	86.4358	44.65	93.9769	-1.08591	0.0116904			cdna:known chromosome:Zv9:6:9702534:9705778:-1 gene:ENSDARG00000090793 gene_biotype:protein_coding transcript_biotype:processed_transcript	chr6:9702534-9705778
ENSDART00000135308	5053.53	1655.01	2618.05	158.956	286.648	3108.86	222.802	3.71218	0.0116921			havana:lincRNA chromosome:Zv9:1:6993885:6996625:1 gene:ENSDARG00000095344 gene_biotype:lincRNA transcript_biotype:lincRNA	chr1:6993885-6996625
ENSDART00000038128	18727.2	1016.17	36570.6	3.38305	10.389	18771.3	6.88603	10.5457	0.0116928	mcts1	GO:0003723 (RNA binding)	malignant T cell amplified sequence 1 [Source:ZFIN;Acc:ZDB-GENE-040426-957]	chr14:34482594-34488065
ENSDART00000152067	15381.7	1036.5	13907.7	28.6641	8.16062	10108.6	18.4123	8.62842	0.011712			cdna:known chromosome:Zv9:17:32833682:32837272:1 gene:ENSDARG00000055120 gene_biotype:protein_coding transcript_biotype:processed_transcript	chr17:32833682-32837272
ENSDART00000075593	160.172	74.4717	83.3389	413.879	559.183	105.994	486.531	-2.26912	0.0117312	f9a	GO:0004252 (serine-type endopeptidase activity)	coagulation factor IXa [Source:ZFIN;Acc:ZDB-GENE-030714-2]	chr14:33300861-33308079
ENSDART00000058967	6083.9	8408.19	2329.79	372.483	276.551	5607.29	324.517	3.93857	0.0117475	rap2b	GO:0000166 (nucleotide binding)	RAP2B, member of RAS oncogene family [Source:ZFIN;Acc:ZDB-GENE-040426-2818]	chr18:49642250-49642814
ENSDART00000148480	61.6512	58.7094	44.2097	29.0085	25.0476	54.8568	27.0281	1.01012	0.0117575	inpp5k	GO:0046856 (phosphatidylinositol dephosphorylation)	inositol polyphosphate-5-phosphatase K [Source:ZFIN;Acc:ZDB-GENE-100408-3]	chr10:24735730-24750722
ENSDART00000110335	3.53411	15.9107	8.95089	8420.74	2562.72	9.46523	5491.73	-9.18983	0.0117768	ccdc147	GO:0000166 (nucleotide binding)	coiled-coil domain containing 147 [Source:ZFIN;Acc:ZDB-GENE-060929-128]	chr1:48328726-48509475
GENSCAN00000018972	2521.77	3363.4	3588.46	7090.36	6554.47	3157.88	6822.42	-1.1266	0.0117932			cdna:genscan chromosome:Zv9:7:8530218:8540052:1 transcript_biotype:protein_coding	chr7:8530218-8540052
ENSDART00000023584	2352.68	644.269	2010.87	54.3072	45.915	1669.27	50.1111	4.85976	0.0117994	si:ch1073-300g4.1	GO:0005200 (structural constituent of cytoskeleton)	talin 2 [Source:HGNC Symbol;Acc:HGNC:15447]	chr25:33983333-34104360
ENSDART00000074129	10401.9	7108.17	8689.2	27274.3	35589.4	8733.1	31431.8	-1.85226	0.0118268	zgc:171489	GO:0003674 (molecular_function)	zgc:171489 [Source:ZFIN;Acc:ZDB-GENE-080303-25]	chr3:59324062-59337469
GENSCAN00000020180	11540.9	2866.75	1929.05	40.1037	49.69	5445.55	44.8969	6.48417	0.0118747			cdna:genscan chromosome:Zv9:25:32880219:32885571:-1 transcript_biotype:protein_coding	chr25:32880219-32885571
ENSDART00000146867	3975.55	896.523	7890.21	2.71036	10.9926	4254.09	6.85146	9.12186	0.0118788	aldoaa	GO:0016829 (lyase activity)	aldolase a, fructose-bisphosphate, a [Source:ZFIN;Acc:ZDB-GENE-030131-8369]	chr3:39561781-39571834
ENSDART00000090484	51.8268	43.3209	73.8788	20.8945	16.4585	56.3422	18.6765	1.567	0.0119151	tecpr1a	GO:0016021 (integral component of membrane)	tectonin beta-propeller repeat containing 1a [Source:ZFIN;Acc:ZDB-GENE-070112-1792]	chr12:18829497-18865039
ENSDART00000067575	4.83886	6.97996	2.71429	43.6829	48.0198	4.84437	45.8514	-3.34446	0.0119434	olfcg9	GO:0004930 (G-protein coupled receptor activity)	olfactory receptor C family, g9 [Source:ZFIN;Acc:ZDB-GENE-081029-6]	chr14:17585097-17589334
ENSDART00000134802	128.197	21.2729	43.4368	2317.34	1532.11	64.3023	1924.72	-5.26177	0.0119482	ftr09	GO:0005515 (protein binding)	finTRIM family, member 9 [Source:ZFIN;Acc:ZDB-GENE-070912-223]	chr2:42431946-42434347
ENSDART00000154038	122.167	97.701	92.305	236.978	199.786	104.058	218.382	-1.07501	0.0119599	si:ch73-168o14.2	GO:0005515 (protein binding)	synaptotagmin VII [Source:HGNC Symbol;Acc:HGNC:11514]	chr25:4451557-4642897
ENSDART00000092047	8823.64	2113.05	5863.16	41.6701	14.3233	5599.95	27.9967	7.61262	0.0119886	ppwd1	GO:0005515 (protein binding)	peptidylprolyl isomerase domain and WD repeat containing 1 [Source:ZFIN;Acc:ZDB-GENE-070615-16]	chr10:11733687-11754461
ENSDART00000042674	2546.36	3964.03	3384.87	3.48051	6.42054	3298.42	4.95052	9.42296	0.0120944	helz	GO:0016787 (hydrolase activity)	helicase with zinc finger [Source:ZFIN;Acc:ZDB-GENE-040426-2419]	chr3:61617341-61695316
ENSDART00000101355	201.001	76.4368	105.847	1038.07	1830.97	127.762	1434.52	-3.55134	0.0121567	mucms1		mucin, multiple PTS and SEA group, member 1 [Source:ZFIN;Acc:ZDB-GENE-061009-17]	chr1:45594647-45612721
ENSDART00000148189	1374.89	17908.5	956.219	3.33089	6.90144	6746.55	5.11617	9.22348	0.0121943	ccdc43		coiled-coil domain containing 43 [Source:ZFIN;Acc:ZDB-GENE-040426-1587]	chr3:31737569-31742307
ENSDART00000126597	1226.02	1486.06	1079.21	2670.96	2758.53	1263.76	2714.75	-1.11548	0.0122643			ncrna:rRNA scaffold:Zv9:Zv9_scaffold3510:76173:76288:-1 gene:ENSDARG00000087351 gene_biotype:rRNA transcript_biotype:rRNA
ENSDART00000110781	718.097	314.052	1161.71	4.08544	10.5336	731.287	7.3095	6.60794	0.0122687	si:dkeyp-66d1.5	GO:0005515 (protein binding)	nuclear factor of activated T-cells, cytoplasmic, calcineurin-dependent 4 [Source:HGNC Symbol;Acc:HGNC:7778]	chr2:37496488-37524447
GENSCAN00000004580	912.3	871.985	6566.24	10.1626	7.5215	2783.51	8.84206	7.63268	0.0123186			cdna:genscan chromosome:Zv9:11:9602597:9701850:-1 transcript_biotype:protein_coding	chr11:9602597-9701850
ENSDART00000053267	55774.4	33294.6	26847.7	3795.06	6031.28	38638.9	4913.17	2.94353	0.0123369	hnrnpa1b	GO:0000166 (nucleotide binding)	heterogeneous nuclear ribonucleoprotein A1b [Source:ZFIN;Acc:ZDB-GENE-030912-14]	chr23:36358083-36361962
ENSDART00000013224	13048.3	6489.6	1405.17	15.2259	17.4307	6981.02	16.3283	8.238	0.0123455	strap	GO:0005515 (protein binding)	serine/threonine kinase receptor associated protein [Source:ZFIN;Acc:ZDB-GENE-040426-1110]	chr4:15945015-15951235
ENSDART00000147081	27.6291	15.8271	23.9903	61.7859	71.8746	22.4822	66.8302	-1.60603	0.0123751	si:ch211-196n4.2	GO:0004672 (protein kinase activity)	si:ch211-196n4.2 [Source:ZFIN;Acc:ZDB-GENE-060503-582]	chr19:24253788-24255508
ENSDART00000123596	7.67688	3.16526	3.11652	124.331	266.581	4.65288	195.456	-5.42731	0.0124554			cdna:known chromosome:Zv9:13:25282623:25423115:-1 gene:ENSDARG00000039429 gene_biotype:protein_coding transcript_biotype:processed_transcript	chr13:25282623-25423115
ENSDART00000132317	6.41507	4.73301	5.66059	2.73283	2.64857	5.60289	2.6907	1.04725	0.012464	asl	GO:0004056 (argininosuccinate lyase activity)	argininosuccinate lyase [Source:ZFIN;Acc:ZDB-GENE-040426-1152]	chr21:30016204-30037533
ENSDART00000131336	15.9856	10.2948	8.99363	2.69099	2.8763	11.758	2.78365	2.03431	0.0125088	si:dkey-15h8.11		si:dkey-15h8.11 [Source:ZFIN;Acc:ZDB-GENE-050208-787]	chr22:3081523-3089853
ENSDART00000119873	2201.91	1575.83	1585.16	3356.43	3828.37	1787.64	3592.4	-1.02199	0.0125177			ncrna:rRNA chromosome:Zv9:7:70686887:70687001:1 gene:ENSDARG00000084473 gene_biotype:rRNA transcript_biotype:rRNA	chr7:70686887-70687001
ENSDART00000102525	3690.66	6110.76	7656.67	1175.85	1039.99	5819.36	1107.92	2.33218	0.0125279	stt3b	GO:0004576 (oligosaccharyl transferase activity)	STT3, subunit of the oligosaccharyltransferase complex, homolog B (S. cerevisiae) [Source:ZFIN;Acc:ZDB-GENE-030131-2638]	chr16:42052001-42144277
ENSDART00000122883	39.8619	66.4988	145.469	780.877	1073.59	83.9431	927.232	-3.653	0.0125619		GO:0005525 (GTP binding)	DIRAS family, GTP-binding RAS-like 2 [Source:HGNC Symbol;Acc:HGNC:19323]	chr10:5601223-5601822
ENSDART00000133680	1202.24	13059.9	14618.4	40.8506	19.4446	9626.85	30.1476	7.76316	0.0125637			cdna:known chromosome:Zv9:23:25426730:25433752:1 gene:ENSDARG00000070675 gene_biotype:protein_coding transcript_biotype:retained_intron	chr23:25426730-25433752
ENSDART00000055961	260.811	831.462	2813.66	2.71902	3.4704	1301.98	3.09471	8.10911	0.0125888	thg1l	GO:0008193 (tRNA guanylyltransferase activity)	tRNA-histidine guanylyltransferase 1-like (S. cerevisiae) [Source:ZFIN;Acc:ZDB-GENE-041114-170]	chr14:6501312-6506530
ENSDART00000027718	17683.9	12666.9	2777.9	21.5513	73.5686	11042.9	47.5599	7.74421	0.0126777	fxr2	GO:0003723 (RNA binding)	fragile X mental retardation, autosomal homolog 2 [Source:ZFIN;Acc:ZDB-GENE-040426-943]	chr7:23885371-23928181
ENSDART00000132363	10.1269	66.4216	19.6464	1114.14	3128.39	32.0649	2121.26	-6.30316	0.0126792			cdna:known chromosome:Zv9:14:22107840:22116461:1 gene:ENSDARG00000053684 gene_biotype:protein_coding transcript_biotype:processed_transcript	chr14:22107840-22116461
ENSDART00000147309	32692.9	39578.3	17049.3	3629.53	3326.4	29773.5	3477.97	3.01285	0.0126977	hnrnpk	GO:0003723 (RNA binding)	heterogeneous nuclear ribonucleoprotein K [Source:ZFIN;Acc:ZDB-GENE-040426-1926]	chr8:52006517-52027085
ENSDART00000124627	11498.8	5806.48	1259.48	17.2399	20.8909	6188.26	19.0654	7.85085	0.0127308	strap	GO:0005515 (protein binding)	serine/threonine kinase receptor associated protein [Source:ZFIN;Acc:ZDB-GENE-040426-1110]	chr4:15945015-15951235
GENSCAN00000007949	9422.71	6661.57	2008.58	338.888	188.668	6030.95	263.778	4.30966	0.0127876			cdna:genscan chromosome:Zv9:4:50271780:50294728:1 transcript_biotype:protein_coding	chr4:50271780-50294728
ENSDART00000148621	15998.2	8088.58	1216.87	24.0413	64.0073	8434.54	44.0243	7.10494	0.012792			cdna:known chromosome:Zv9:7:34320887:34326768:-1 gene:ENSDARG00000036080 gene_biotype:protein_coding transcript_biotype:retained_intron	chr7:34320887-34326768
ENSDART00000060685	38727.3	22945.1	21245.9	8967.15	7194.04	27639.4	8080.6	1.72911	0.0127984	tmed10	GO:0016020 (membrane)	transmembrane emp24-like trafficking protein 10 (yeast) [Source:ZFIN;Acc:ZDB-GENE-030131-4915]	chr20:46787595-46792831
ENSDART00000098527	1881.54	575.111	4874.78	9.73406	11.8519	2443.81	10.793	7.34046	0.0128028	zgc:56194	GO:0008237 (metallopeptidase activity)	endoplasmic reticulum aminopeptidase 1 [Source:HGNC Symbol;Acc:HGNC:18173]	chr5:27878974-27892220
ENSDART00000138488	3807.68	3229.49	386.475	2.69958	2.74116	2474.55	2.72037	9.27158	0.0128787	nasp	GO:0005515 (protein binding)	nuclear autoantigenic sperm protein (histone-binding) [Source:ZFIN;Acc:ZDB-GENE-030131-5511]	chr6:33608799-33614433
ENSDART00000152196	11.2232	6.8359	10.5145	2.66351	2.85206	9.52455	2.75779	1.75595	0.0128821			havana:antisense chromosome:Zv9:1:8233394:8238721:-1 gene:ENSDARG00000096584 gene_biotype:antisense transcript_biotype:antisense	chr1:8233394-8238721
ENSDART00000116057	57749.9	15186.2	34165.9	164.423	55.218	35700.7	109.821	8.34859	0.0128824			ncrna:miRNA chromosome:Zv9:1:45317627:45317802:-1 gene:ENSDARG00000082269 gene_biotype:miRNA transcript_biotype:miRNA	chr1:45317627-45317802
ENSDART00000067086	17054.4	1317.27	1473.48	2.72908	3.41314	6615.05	3.07111	10.039	0.0129391	nans	GO:0003824 (catalytic activity)	N-acetylneuraminic acid synthase [Source:ZFIN;Acc:ZDB-GENE-030131-1500]	chr1:11631992-11640923
ENSDART00000083053	366.324	82.7106	297.018	3.15653	7.69198	248.684	5.42426	5.39961	0.0129607	ubfd1	GO:0005515 (protein binding)	ubiquitin family domain containing 1 [Source:ZFIN;Acc:ZDB-GENE-050506-90]	chr3:42654951-42669100
ENSDART00000145357	34.2846	2.65841	6.56915	760.65	1530.97	14.504	1145.81	-7.00041	0.0130045	htatip2		HIV-1 Tat interactive protein 2 [Source:ZFIN;Acc:ZDB-GENE-001219-1]	chr7:17871519-17878421
ENSDART00000138754	8267.53	5075.48	6591.28	19913.7	18637.3	6644.76	19275.5	-1.56405	0.0130094	col6a3	GO:0005515 (protein binding)	collagen, type VI, alpha 3 [Source:ZFIN;Acc:ZDB-GENE-070501-8]	chr9:24947662-24978784
ENSDART00000140096	58478.5	42263.9	45948.2	21420.2	17325.3	48896.9	19372.8	1.32985	0.013021	metap1	GO:0008235 (metalloexopeptidase activity)	methionyl aminopeptidase 1 [Source:ZFIN;Acc:ZDB-GENE-050626-124]	chr13:12475978-12502317
ENSDART00000133676	21.8645	21.1033	12.0729	74.4861	65.9516	18.3469	70.2188	-1.98324	0.0131063	si:dkey-91i10.2	GO:0005089 (Rho guanyl-nucleotide exchange factor activity)	si:dkey-91i10.2 [Source:ZFIN;Acc:ZDB-GENE-050208-441]	chr9:23974307-23997242
ENSDART00000031245	16943.9	12310.1	10276.9	3.65858	7.58258	13177	5.62058	11.2574	0.0131209	abi1a	GO:0005515 (protein binding)	abl-interactor 1a [Source:ZFIN;Acc:ZDB-GENE-040426-1701]	chr24:6018848-6096176
ENSDART00000109084	989.815	17957.6	3370.89	2.73449	2.81787	7439.44	2.77618	10.4611	0.0131333	daam1b	GO:0005488 (binding)	dishevelled associated activator of morphogenesis 1b [Source:ZFIN;Acc:ZDB-GENE-030131-4212]	chr20:21886979-22067061
GENSCAN00000024374	13231.7	8137.16	9482.01	28157.5	30412.5	10283.6	29285	-1.53914	0.0131591			cdna:genscan chromosome:Zv9:14:13731566:13732798:-1 transcript_biotype:protein_coding	chr14:13731566-13732798
ENSDART00000065037	5225.81	5540.53	301.954	2.76986	7.02967	3689.43	4.89976	8.86684	0.0131867	lmnb1	GO:0005198 (structural molecule activity)	lamin B1 [Source:ZFIN;Acc:ZDB-GENE-020424-2]	chr10:16064820-16085482
ENSDART00000142969	1963.06	1005.87	1021.75	8689.2	5745.32	1330.23	7217.26	-2.48328	0.0132524	tcf7l1b		transcription factor 7-like 1b (T-cell specific, HMG-box) [Source:ZFIN;Acc:ZDB-GENE-991110-10]	chr8:54385857-54508714
ENSDART00000083024	2872.78	4751.58	16800.4	47.7963	14.0615	8141.6	30.9289	7.88329	0.0132673	gpr146	GO:0004930 (G-protein coupled receptor activity)	G protein-coupled receptor 146 [Source:ZFIN;Acc:ZDB-GENE-050823-3]	chr3:45725379-45755688
ENSDART00000149212	27.0733	25.0923	36.085	3.97965	2.78768	29.4169	3.38367	3.12458	0.013318			cdna:known chromosome:Zv9:21:206785:210404:-1 gene:ENSDARG00000007915 gene_biotype:protein_coding transcript_biotype:retained_intron	chr21:206785-210404
ENSDART00000139105	196.539	802.182	2468.81	4.01223	2.70991	1155.85	3.36107	7.7907	0.0133899			cdna:known chromosome:Zv9:6:52182570:52185499:-1 gene:ENSDARG00000001557 gene_biotype:protein_coding transcript_biotype:retained_intron	chr6:52182570-52185499
ENSDART00000108598	38.7591	55.1118	63.8734	16.9915	15.9305	52.5814	16.461	1.64574	0.0133914	lama1	GO:0005515 (protein binding)	laminin, alpha 1 [Source:ZFIN;Acc:ZDB-GENE-060118-1]	chr24:43450377-43542769
ENSDART00000110270	185.353	1129.88	601.288	21.035	12.9833	638.84	17.0092	4.92268	0.0133947	pwp2h	GO:0005515 (protein binding)	PWP2 periodic tryptophan protein homolog (yeast) [Source:ZFIN;Acc:ZDB-GENE-021031-3]	chr1:27829555-27880976
ENSDART00000156984	5.36951	77.6076	24.116	1701.68	4593.89	35.6977	3147.78	-7.01751	0.0134056	si:dkey-238d18.8	GO:0005515 (protein binding)	sialic acid binding Ig-like lectin 8 [Source:HGNC Symbol;Acc:HGNC:10877]	chr15:36684480-36687030
GENSCAN00000024773	13039.6	7042.5	1018.4	23.2482	59.3586	7033.5	41.3034	6.93297	0.0134088			cdna:genscan chromosome:Zv9:7:34298829:34341336:-1 transcript_biotype:protein_coding	chr7:34298829-34341336
ENSDART00000142021	45225.7	30727.1	22337	7847.13	9726.85	32763.3	8786.99	1.84689	0.013439			cdna:known chromosome:Zv9:9:50228:51541:-1 gene:ENSDARG00000034961 gene_biotype:protein_coding transcript_biotype:retained_intron	chr9:50228-51541
ENSDART00000148670	6116.94	10844.6	9350.96	2.86907	6.33881	8770.82	4.60394	10.9657	0.0134566	adkb		adenosine kinase b [Source:ZFIN;Acc:ZDB-GENE-030131-948]	chr12:47956282-47969252
ENSDART00000001253	3059.67	5398.99	329.156	3.9547	7.4132	2929.27	5.68395	8.34326	0.0135069	si:busm1-57f23.1	GO:0004869 (cysteine-type endopeptidase inhibitor activity)	si:busm1-57f23.1 [Source:ZFIN;Acc:ZDB-GENE-030616-512]	chr10:13199890-13203157
GENSCAN00000011769	90.6076	265.282	585.315	21087	8044.05	313.735	14565.5	-5.75355	0.0135125			cdna:genscan chromosome:Zv9:21:43710848:43743016:-1 transcript_biotype:protein_coding	chr21:43710848-43743016
ENSDART00000133322	2687.06	12504.9	3433.74	87.1227	94.6906	6208.56	90.9066	5.74413	0.0135307	eno1a	GO:0004634 (phosphopyruvate hydratase activity)	enolase 1a, (alpha) [Source:ZFIN;Acc:ZDB-GENE-030131-6048]	chr23:22950619-22972140
ENSDART00000132369	37.7521	25.3218	27.5525	12.4396	14.8173	30.2088	13.6284	1.13193	0.0135359			cdna:known chromosome:Zv9:18:7102865:7103501:1 gene:ENSDARG00000063321 gene_biotype:protein_coding transcript_biotype:retained_intron	chr18:7102865-7103501
ENSDART00000114983	5.47406	6.25021	7.69874	3.26212	2.70731	6.47434	2.98471	1.10905	0.0135645	fam19a4a		family with sequence similarity 19 (chemokine (C-C motif)-like), member A4a [Source:ZFIN;Acc:ZDB-GENE-090313-310]	chr23:18309307-18315911
GENSCAN00000011927	15589.9	19860.5	20407.9	35818.1	42827.6	18619.4	39322.9	-1.08307	0.0135754			cdna:genscan chromosome:Zv9:24:11958991:11983433:-1 transcript_biotype:protein_coding	chr24:11958991-11983433
ENSDART00000135325	841.733	1603.97	6933.83	10.7197	10.453	3126.51	10.5863	7.63735	0.0135769			cdna:known chromosome:Zv9:24:14445414:14453716:1 gene:ENSDARG00000045372 gene_biotype:protein_coding transcript_biotype:retained_intron	chr24:14445414-14453716
ENSDART00000135409	12253.9	11004.9	1437.49	11.8183	45.0941	8232.1	28.4562	7.96981	0.013599	tsr1	GO:0005634 (nucleus)	TSR1, 20S rRNA accumulation, homolog (yeast) [Source:ZFIN;Acc:ZDB-GENE-030131-3762]	chr15:24970133-24991138
ENSDART00000115182	843.209	799.684	425.19	2560.68	3061.35	689.361	2811.02	-2.08613	0.0136328	nup214		nucleoporin 214 [Source:ZFIN;Acc:ZDB-GENE-110203-3]	chr5:74986957-75084806
ENSDART00000007808	5.22334	6.69314	5.08321	2.68656	2.72045	5.66656	2.70351	1.05633	0.0136418	nitr9	GO:0005515 (protein binding)	novel immune-type receptor 9 [Source:ZFIN;Acc:ZDB-GENE-041001-6]	chr7:18030943-18087153
ENSDART00000143251	461.774	158.337	269.458	3705.14	3610.69	296.523	3657.92	-3.75941	0.0136502			havana:processed_transcript chromosome:Zv9:4:45473995:45476142:1 gene:ENSDARG00000095465 gene_biotype:processed_transcript transcript_biotype:retained_intron	chr4:45473995-45476142
ENSDART00000111097	14.0044	18.3778	17.3655	8.1692	8.23071	16.5826	8.19996	1.00634	0.0136514			chromosome 8 open reading frame 4 [Source:HGNC Symbol;Acc:HGNC:1357]	chr10:20290436-20290756
GENSCAN00000005249	64.8253	226.845	251.936	3120.91	1784.64	181.202	2452.78	-3.93093	0.0136525			cdna:genscan chromosome:Zv9:4:5316718:5334418:-1 transcript_biotype:protein_coding	chr4:5316718-5334418
ENSDART00000138652	15.974	22.8202	14.4128	40.4341	50.823	17.7356	45.6286	-1.38273	0.0137001	si:dkey-238m4.4		si:dkey-238m4.4 [Source:ZFIN;Acc:ZDB-GENE-100922-215]	chr16:24658455-24663307
ENSDART00000152126	3.12603	3.6198	2.88899	6.11046	7.17546	3.21161	6.64296	-1.05024	0.0137026	meiob		meiosis specific with OB domains [Source:ZFIN;Acc:ZDB-GENE-120104-8]	chr12:19558831-19569440
ENSDART00000138869	5020.73	1699.01	2753	171.466	315.526	3157.58	243.496	3.62195	0.0137222			havana:lincRNA chromosome:Zv9:1:6993886:6996637:1 gene:ENSDARG00000095344 gene_biotype:lincRNA transcript_biotype:lincRNA	chr1:6993886-6996637
ENSDART00000155242	6.82138	5.27994	9.59439	19.7858	26.1564	7.23191	22.9711	-1.69681	0.0137305	si:ch211-157j23.5		si:ch211-157j23.5 [Source:ZFIN;Acc:ZDB-GENE-131122-55]	chr24:5912644-5921702
ENSDART00000109043	16033.1	20280.6	3444.31	39.1446	128.02	13252.7	83.5823	7.19671	0.0137383	fosl1b	GO:0043565 (sequence-specific DNA binding)	FOS-like antigen 1b [Source:ZFIN;Acc:ZDB-GENE-091204-259]	chr21:24994485-24998233
ENSDART00000147992	4.1698	2.71632	3.39458	8.85826	7.20278	3.4269	8.03052	-1.24283	0.0137435	si:ch211-170d8.5			chr8:41685924-41692286
ENSDART00000109420	6.27788	2.71915	2.678	17.7671	26.6499	3.89168	22.2085	-2.6054	0.0137836	kcnip1b	GO:0046872 (metal ion binding)	Kv channel interacting protein 1 b [Source:ZFIN;Acc:ZDB-GENE-041212-57]	chr10:22203960-22232131
ENSDART00000065755	834.572	713.032	91.5353	7.0705	2.75996	546.38	4.91523	6.4231	0.0138241	gpn3	GO:0000166 (nucleotide binding)	GPN-loop GTPase 3 [Source:ZFIN;Acc:ZDB-GENE-040724-141]	chr21:15527922-15534239
ENSDART00000102062	62562.6	65384.3	51481.3	14495.4	11334.9	59809.4	12915.1	2.21458	0.0138727	timp2b	GO:0005515 (protein binding)	tissue inhibitor of metalloproteinase 2b [Source:ZFIN;Acc:ZDB-GENE-040426-2655]	chr3:58446853-58480406
ENSDART00000136657	12075.8	4954.54	7872.78	17.0301	41.1953	8301.04	29.1127	8.19846	0.0138958	vrk3	GO:0016740 (transferase activity)	vaccinia related kinase 3 [Source:ZFIN;Acc:ZDB-GENE-030131-246]	chr7:30402423-30417063
ENSDART00000146407	9059.94	3755.86	7425.29	10.3375	3.87079	6747.03	7.10416	9.96492	0.0139061			havana:processed_transcript chromosome:Zv9:2:9535344:9536944:-1 gene:ENSDARG00000092780 gene_biotype:processed_transcript transcript_biotype:lincRNA	chr2:9535344-9536944
ENSDART00000067322	44.6948	29.9102	28.2035	85.5975	111.195	34.2695	98.3963	-1.54076	0.0139604	fbxl14b	GO:0005515 (protein binding)	F-box and leucine-rich repeat protein 14b [Source:ZFIN;Acc:ZDB-GENE-030131-3556]	chr4:7547764-7550088
ENSDART00000112929	3.51263	4.28808	2.90764	6.57495	7.60667	3.56945	7.09081	-1.00454	0.013984	her12	GO:0046983 (protein dimerization activity)	hairy-related 12 [Source:ZFIN;Acc:ZDB-GENE-040824-5]	chr23:21739064-21741127
ENSDART00000028007	7915.74	5580.75	13209.8	1438.55	2047.68	8902.09	1743.11	2.2836	0.0140471	supt6h	GO:0005515 (protein binding)	suppressor of Ty 6 homolog [Source:ZFIN;Acc:ZDB-GENE-030131-7949]	chr21:25422434-25452034
ENSDART00000114446	3.0367	5.26734	22.3538	1286.34	412.442	10.2193	849.39	-6.68121	0.014051	suds3		suppressor of defective silencing 3 homolog (SDS3, S. cerevisiae) [Source:ZFIN;Acc:ZDB-GENE-040801-236]	chr5:17266480-17284907
ENSDART00000146730	18398.5	27672.5	16265.4	4605.55	3146.93	20778.8	3876.24	2.40989	0.0141837			havana:processed_transcript chromosome:Zv9:14:18736703:18738102:1 gene:ENSDARG00000093678 gene_biotype:processed_transcript transcript_biotype:processed_transcript	chr14:18736703-18738102
ENSDART00000155951	4.29808	5.17794	6.11894	15.6604	20.4207	5.19832	18.0405	-1.79739	0.0142409	si:ch73-23l24.1		si:ch73-23l24.1 [Source:ZFIN;Acc:ZDB-GENE-131127-400]	chr6:15150500-15159247
ENSDART00000051567	3220.63	4699.67	2092.61	21.257	9.30888	3337.64	15.2829	7.81328	0.0142768	abhd17b	GO:0008236 (serine-type peptidase activity)	abhydrolase domain containing 17B [Source:ZFIN;Acc:ZDB-GENE-040718-244]	chr5:27378323-27397751
ENSDART00000024296	29659	8535.85	1169.71	2.72506	2.82197	13121.5	2.77351	11.231	0.0142877	egln1	GO:0016706 (oxidoreductase activity, acting on paired donors, with incorporation or reduction of molecular oxygen, 2-oxoglutarate as one donor, and incorporation of one atom each of oxygen into both donors)	egl nine homolog 1 (C. elegans) [Source:ZFIN;Acc:ZDB-GENE-040718-338]	chr11:32383282-32428576
ENSDART00000099397	3.14602	4.61661	2.8925	9.61794	7.8073	3.55171	8.71262	-1.31772	0.0142909	or105-1	GO:0004871 (signal transducer activity)	odorant receptor, family C, subfamily 105, member 1 [Source:ZFIN;Acc:ZDB-GENE-070806-54]	chr10:37525273-37526385
ENSDART00000137976	2626.13	2013.9	1688.44	5324.77	4358.81	2109.49	4841.79	-1.21546	0.0143113	si:dkey-21e2.15	GO:0004252 (serine-type endopeptidase activity)		chr22:19608015-19609590
ENSDART00000101513	7.1761	10.0518	22.4185	3056.9	8885.58	13.2155	5971.24	-8.79449	0.0143184	ppp6r2b	GO:0005488 (binding)	protein phosphatase 6, regulatory subunit 2b [Source:ZFIN;Acc:ZDB-GENE-070705-441]	chr18:5894755-5941928
ENSDART00000027616	7519.39	17634.4	17904.7	1786.06	2192.93	14352.9	1989.49	2.75292	0.0143293	eif4g2a	GO:0005488 (binding)	eukaryotic translation initiation factor 4, gamma 2a [Source:ZFIN;Acc:ZDB-GENE-030131-2173]	chr7:67327490-67347861
ENSDART00000075261	9043.73	4700.82	14624.8	823.51	705.516	9456.44	764.513	3.48509	0.0143575	itgb1b		integrin, beta 1b [Source:ZFIN;Acc:ZDB-GENE-030909-10]	chr2:46095866-46102453
ENSDART00000011389	57730.7	55996	38194.3	9568.4	13306.5	50640.3	11437.4	2.14177	0.0143577	pdia3	GO:0016853 (isomerase activity)	protein disulfide isomerase family A, member 3 [Source:ZFIN;Acc:ZDB-GENE-031002-9]	chr25:31332644-31347155
ENSDART00000148365	538.48	1822.97	820.823	92.5912	73.1712	1060.76	82.8812	3.49891	0.0144318			cdna:known chromosome:Zv9:3:26887674:26890342:-1 gene:ENSDARG00000020574 gene_biotype:protein_coding transcript_biotype:retained_intron	chr3:26887674-26890342
ENSDART00000135738	127.731	91.5353	118.917	658.873	486.432	112.728	572.653	-2.34263	0.0144658	zgc:194990	GO:0005515 (protein binding)	zgc:194990 [Source:ZFIN;Acc:ZDB-GENE-081022-171]	chr8:13678631-13701940
ENSDART00000127684	7538.29	2195.74	311.054	2.82121	5.6422	3348.36	4.23171	8.75756	0.0145446	ponzr1	GO:0072078 (nephron tubule morphogenesis)	plac8 onzin related protein 1 [Source:ZFIN;Acc:ZDB-GENE-070727-1]	chr7:21501628-21527465
ENSDART00000145580	918.372	261.925	1165.53	15.2022	16.512	781.943	15.8571	5.36841	0.0145676	gpr1	GO:0004944 (C5a anaphylatoxin receptor activity)	G protein-coupled receptor 1 [Source:ZFIN;Acc:ZDB-GENE-091204-457]	chr9:1110331-1117691
ENSDART00000058662	3.55866	10.9244	42.9057	3366.48	3940.47	19.1296	3653.47	-8.26262	0.0145861	dbt	GO:0043754 (dihydrolipoyllysine-residue (2-methylpropanoyl)transferase activity)	dihydrolipoamide branched chain transacylase E2 [Source:ZFIN;Acc:ZDB-GENE-050320-85]	chr22:16508269-16519609
ENSDART00000057960	15.2926	21.9042	10.7653	5301.02	2441.68	15.9874	3871.35	-7.87412	0.0146127	si:dkey-235d18.5	GO:0005515 (protein binding)	si:dkey-235d18.5 [Source:ZFIN;Acc:ZDB-GENE-041014-243]	chr20:52926069-53067233
ENSDART00000148114	11.5118	8.23709	10.3725	3.67293	2.86461	10.0405	3.26877	1.61632	0.0146226	dnai1		dynein, axonemal, intermediate polypeptide 1 [Source:ZFIN;Acc:ZDB-GENE-040910-7]	chr21:16858575-16870056
ENSDART00000137717	7183.5	9686.96	823.253	9.98935	8.03292	5897.9	9.01114	8.74934	0.0146244	tnc	GO:0005515 (protein binding)	tenascin C [Source:ZFIN;Acc:ZDB-GENE-980526-104]	chr5:30199064-30263575
ENSDART00000132475	139.885	393.595	169.858	1669.19	3013.69	234.446	2341.44	-3.41217	0.0146459	si:ch211-165f21.1		si:ch211-165f21.1 [Source:ZFIN;Acc:ZDB-GENE-060503-860]	chr7:6405723-6408552
ENSDART00000135664	22.1002	12.933	15.447	48.6709	66.3083	16.8268	57.4896	-1.79197	0.0146479	si:ch211-214c11.2	GO:0004672 (protein kinase activity)	si:ch211-214c11.2 [Source:ZFIN;Acc:ZDB-GENE-060503-24]	chr19:23867593-23868881
ENSDART00000114800	31.1408	19.9567	207.551	14731.1	16812.9	86.2161	15772	-8.28297	0.0146782	si:ch211-163l21.4		chromosome 1 open reading frame 106 [Source:HGNC Symbol;Acc:HGNC:25599]	chr8:24606216-24618150
ENSDART00000099899	7667.03	1926.71	6853.57	128.745	124.966	5482.44	126.856	5.19945	0.0146849		GO:0016021 (integral component of membrane)	Uncharacterized protein [Source:UniProtKB/TrEMBL;Acc:F1QWG5]	chr4:60547168-60551864
ENSDART00000059956	5.93543	16.6662	70.6618	3504.48	4682.45	31.0878	4093.46	-7.72699	0.0147133	kdelr3	GO:0046923 (ER retention sequence binding)	KDEL (Lys-Asp-Glu-Leu) endoplasmic reticulum protein retention receptor 3 [Source:ZFIN;Acc:ZDB-GENE-040426-1387]	chr3:716560-734048
ENSDART00000081477	5401.68	1450.37	361.464	15.6052	7.75984	2404.51	11.6825	7.00638	0.0147728	sri	GO:0005509 (calcium ion binding)	sorcin [Source:ZFIN;Acc:ZDB-GENE-040426-1356]	chr16:8405673-8423408
ENSDART00000005355	5299.41	26672.4	2890.61	35.1234	33.4838	11620.8	34.3036	7.7574	0.0147802	zgc:56576		chromosome 14 open reading frame 166 [Source:HGNC Symbol;Acc:HGNC:23169]	chr17:14625497-14635980
ENSDART00000114783	14031.3	1008.85	6461.29	11.3759	15.4969	7167.14	13.4364	8.40658	0.0147837	clip1a		CAP-GLY domain containing linker protein 1a [Source:ZFIN;Acc:ZDB-GENE-060526-282]	chr5:70183718-70237795
ENSDART00000137581	7965.51	2677.05	1554.77	4.49019	15.9924	4065.78	10.2413	8.56644	0.0147886			cdna:known chromosome:Zv9:5:58364136:58365579:-1 gene:ENSDARG00000052536 gene_biotype:protein_coding transcript_biotype:retained_intron	chr5:58364136-58365579
ENSDART00000146123	37943.8	25233.3	31149	12656.6	13290.7	31442	12973.7	1.25764	0.0148031	elavl1	GO:0000166 (nucleotide binding)	ELAV (embryonic lethal, abnormal vision, Drosophila)-like 1 (Hu antigen R) [Source:ZFIN;Acc:ZDB-GENE-990415-245]	chr2:36844171-36855031
ENSDART00000134361	2694.84	669.752	347.037	15.8738	32.0237	1237.21	23.9487	5.24598	0.0148207			cdna:novel chromosome:Zv9:7:25527238:25531917:-1 gene:ENSDARG00000044125 gene_biotype:protein_coding transcript_biotype:retained_intron	chr7:25527238-25531917
ENSDART00000133679	39.4661	39.5898	268.748	10031.9	7845.37	115.935	8938.62	-6.8884	0.0148623	rbm39a	GO:0003676 (nucleic acid binding)	RNA binding motif protein 39a [Source:ZFIN;Acc:ZDB-GENE-040426-2852]	chr11:25272921-25278982
ENSDART00000130022	96.4618	68.0062	86.0678	30.3442	37.7785	83.512	34.0614	1.28754	0.0148722			ensembl_havana_transcript:lincRNA chromosome:Zv9:2:372562:373244:-1 gene:ENSDARG00000087516 gene_biotype:lincRNA transcript_biotype:lincRNA	chr2:372562-373244
ENSDART00000016658	12484.5	9459.82	484.52	2.8178	5.81611	7476.27	4.31696	9.89464	0.0148804	chpt1	GO:0004142 (diacylglycerol cholinephosphotransferase activity)	choline phosphotransferase 1 [Source:ZFIN;Acc:ZDB-GENE-030131-1325]	chr4:16775192-16793192
ENSDART00000076761	51.014	42.2364	25.4792	3155.33	1586.15	39.5765	2370.74	-5.87928	0.0148876	si:ch73-285p12.4	GO:0005525 (GTP binding)	si:ch73-285p12.4 [Source:ZFIN;Acc:ZDB-GENE-110411-145]	chr23:43918961-43925887
ENSDART00000152374	8363.3	6698.2	983.163	19.0682	16.565	5348.22	17.8166	7.74198	0.0148937	mtmr9	GO:0016791 (phosphatase activity)	myotubularin related protein 9 [Source:ZFIN;Acc:ZDB-GENE-040724-223]	chr20:19017217-19058582
ENSDART00000139760	38.7016	2.79611	7.81508	1134.2	1920.97	16.4376	1527.58	-7.28621	0.0149235	dedd1		death effector domain-containing 1 [Source:ZFIN;Acc:ZDB-GENE-000616-2]	chr16:12544915-12566896
ENSDART00000078014	9.75262	22.5126	13.7365	1068.13	2382.08	15.3339	1725.1	-6.78664	0.015007	poldip2	GO:0003677 (DNA binding)	polymerase (DNA-directed), delta interacting protein 2 [Source:ZFIN;Acc:ZDB-GENE-030131-5881]	chr15:23997836-24043808
ENSDART00000123682	1348.6	1251.96	465.333	130.746	95.5752	1021.96	113.161	3.04518	0.0150082	nktr	GO:0016853 (isomerase activity)	natural killer-tumor recognition sequence [Source:ZFIN;Acc:ZDB-GENE-030131-1725]	chr24:21252110-21267120
ENSDART00000149299	7905.65	572.16	8906.64	3.35961	2.77429	5794.82	3.06695	10.133	0.0150563	cers2b	GO:0043565 (sequence-specific DNA binding)	ceramide synthase 2b [Source:ZFIN;Acc:ZDB-GENE-110408-40]	chr16:1389245-1425912
ENSDART00000056987	21726	15964.6	20006.7	5350.85	4074.82	19232.4	4712.84	2.03027	0.0150618	marcksl1a	GO:0005516 (calmodulin binding)	MARCKS-like 1a [Source:ZFIN;Acc:ZDB-GENE-040426-2146]	chr13:46745086-46748279
ENSDART00000147811	4295.03	3716.1	5427.53	10221.3	9784.13	4479.56	10002.7	-1.17639	0.0150841			havana:processed_transcript chromosome:Zv9:3:3188000:3190005:-1 gene:ENSDARG00000092212 gene_biotype:processed_transcript transcript_biotype:retained_intron	chr3:3188000-3190005
ENSDART00000027225	10414.6	8748.14	10897.6	18595.5	21877	10020.1	20236.3	-1.01563	0.0150859	bgna	GO:0005515 (protein binding)	biglycan a [Source:ZFIN;Acc:ZDB-GENE-040704-74]	chr8:14621447-14643597
ENSDART00000154061	1304.42	315.818	6640.92	2.95093	10.8025	2753.72	6.87674	7.95253	0.0151022	si:zfos-332c3.1		si:zfos-332c3.1 [Source:ZFIN;Acc:ZDB-GENE-131127-543]	chr25:238162-240768
ENSDART00000001803	4019.5	3469.74	359.236	3.16254	3.37594	2616.16	3.26924	9.03255	0.0151028	tomm34	GO:0005515 (protein binding)	translocase of outer mitochondrial membrane 34 [Source:ZFIN;Acc:ZDB-GENE-030131-2081]	chr6:52177501-52185615
ENSDART00000128249	3731.23	7167.97	3686.36	6.355	14.9883	4861.85	10.6717	8.88676	0.0151087	trim8a	GO:0046872 (metal ion binding)	tripartite motif containing 8a [Source:ZFIN;Acc:ZDB-GENE-130107-1]	chr13:11623995-11640322
ENSDART00000077922	645.046	1296.7	696.836	3540.04	2763.41	879.528	3151.72	-1.9047	0.0151372	si:ch211-193e5.4	GO:0016773 (phosphotransferase activity, alcohol group as acceptor)	si:ch211-193e5.4 [Source:ZFIN;Acc:ZDB-GENE-091113-46]	chr24:5996277-5998307
ENSDART00000102548	84.8179	63.4309	105.506	256.406	199.36	84.5851	227.883	-1.44923	0.0151719			Uncharacterized protein [Source:UniProtKB/TrEMBL;Acc:E7EZD7]	chr11:13692571-13702633
ENSDART00000123757	16103.9	56999.7	8271.79	211.806	227.833	27125.1	219.819	6.48338	0.0151932	si:dkey-206d17.5		small integral membrane protein 13 [Source:HGNC Symbol;Acc:HGNC:27356]	chr19:4289432-4295309
ENSDART00000127640	3335.83	5562.57	6584.71	10.1732	4.33017	5161.04	7.25167	9.5462	0.0152772	ttll4	GO:0018095 (protein polyglutamylation)	tubulin tyrosine ligase-like family, member 4 [Source:ZFIN;Acc:ZDB-GENE-070912-313]	chr9:14388707-14419602
ENSDART00000155596	1437.03	1189	887.916	2853.18	2462.67	1171.32	2657.93	-1.20595	0.0153434	si:dkey-7k24.5	GO:0030247 (polysaccharide binding)	somatomedin B and thrombospondin, type 1 domain containing [Source:HGNC Symbol;Acc:HGNC:30362]	chr6:46418208-46431268
ENSDART00000102594	7.07586	11.3345	10.2609	3.80465	2.92619	9.55709	3.36542	1.48982	0.0153493	dek		DEK oncogene [Source:ZFIN;Acc:ZDB-GENE-060512-191]	chr16:43680738-43696209
ENSDART00000143499	1404.02	2965.26	2101.91	8611.67	7167.01	2157.06	7889.34	-1.93069	0.0153566	si:dkey-4c15.15	GO:0046872 (metal ion binding)	si:dkey-4c15.15 [Source:ZFIN;Acc:ZDB-GENE-050420-147]	chr22:1541063-1544174
ENSDART00000153818	20988.3	12695	13413.2	628.57	359.668	15698.8	494.119	5.00699	0.0153587	srsf3a	GO:0000166 (nucleotide binding)	serine/arginine-rich splicing factor 3a [Source:ZFIN;Acc:ZDB-GENE-030616-631]	chr6:41010867-41022102
ENSDART00000057638	1998.92	9690.61	831.73	9.2266	11.0519	4173.76	10.1393	7.96644	0.0153591	hk1	GO:0019158 (mannokinase activity)	hexokinase 1 [Source:ZFIN;Acc:ZDB-GENE-040426-2848]	chr13:23113100-23148025
ENSDART00000146609	300.448	4346.95	2292.63	2.73429	3.39628	2313.34	3.06528	8.88562	0.0153619	coa5		cytochrome C oxidase assembly factor 5 [Source:ZFIN;Acc:ZDB-GENE-060825-53]	chr9:7123093-7130819
ENSDART00000024104	1284.1	4864.87	504.981	8.13899	7.73067	2217.99	7.93483	7.53055	0.0153761	mycn	GO:0046983 (protein dimerization activity)	v-myc myelocytomatosis viral related oncogene, neuroblastoma derived (avian) [Source:ZFIN;Acc:ZDB-GENE-020711-1]	chr20:33333309-33338265
ENSDART00000153193	1376.49	847.826	1710.68	256.166	366.15	1311.66	311.158	2.03964	0.0154451	sash1a		SAM and SH3 domain containing 1a [Source:ZFIN;Acc:ZDB-GENE-030131-9960]	chr20:31454727-31769725
ENSDART00000137904	19.1749	16.0459	12.6801	34.3154	29.842	15.967	32.0787	-1.02344	0.0154692	si:ch211-231i17.3		si:ch211-231i17.3 [Source:ZFIN;Acc:ZDB-GENE-081104-47]	chr4:29125396-29126147
ENSDART00000109414	9.54846	3.82424	56.0032	936.487	2092.61	23.1253	1514.55	-6.78514	0.015473	ankrd6b	GO:0005515 (protein binding)	ankyrin repeat domain 6b [Source:ZFIN;Acc:ZDB-GENE-030916-4]	chr20:1226689-1262912
ENSDART00000112870	15662.5	51877.2	7855.15	230.63	239.761	25131.6	235.195	6.30164	0.0154761	si:dkey-206d17.5		small integral membrane protein 13 [Source:HGNC Symbol;Acc:HGNC:27356]	chr19:2801133-2808409
ENSDART00000137975	9233.84	3658.04	570.84	8.53892	13.9705	4487.57	11.2547	7.93966	0.015485	irak1	GO:0005515 (protein binding)	interleukin-1 receptor-associated kinase 1 [Source:ZFIN;Acc:ZDB-GENE-071116-5]	chr8:8107727-8140332
ENSDART00000121849	13171.5	3045.78	2400.72	80.1618	71.3626	6206	75.7622	5.92136	0.0155244	tnfrsf9a	GO:0005515 (protein binding)	tumor necrosis factor receptor superfamily, member 9a [Source:ZFIN;Acc:ZDB-GENE-060421-8213]	chr23:30244785-30250014
ENSDART00000063038	3.71846	3.95989	3.73899	10.67	9.6353	3.80578	10.1527	-1.4143	0.0155275	nab1a	GO:0005634 (nucleus)	NGFI-A binding protein 1a (EGR1 binding protein 1) [Source:ZFIN;Acc:ZDB-GENE-050208-574]	chr22:13009568-13032183
ENSDART00000074265	109.836	163.1	281.139	36.8241	28.8417	184.692	32.8329	2.39499	0.0155376	asna1		arsA arsenite transporter, ATP-binding, homolog 1 (bacterial) [Source:ZFIN;Acc:ZDB-GENE-040625-120]	chr1:52632454-52647919
ENSDART00000066929	1229.55	4792.94	6229.16	229.715	122.095	4083.88	175.905	4.3107	0.0155524	taf3	GO:0005515 (protein binding)	TAF3 RNA polymerase II, TATA box binding protein (TBP)-associated facto [Source:ZFIN;Acc:ZDB-GENE-030131-6406]	chr4:24171361-24255591
GENSCAN00000023253	125.072	162.134	104.345	3112.79	5103.06	130.517	4107.93	-4.95628	0.0155652			cdna:genscan chromosome:Zv9:3:10166540:10168281:1 transcript_biotype:protein_coding	chr3:10166540-10168281
ENSDART00000092348	9660.02	1643.76	10505.7	56.4381	69.6257	7269.84	63.0319	6.45642	0.0156029			SEC16 homolog A (S. cerevisiae) [Source:HGNC Symbol;Acc:HGNC:29006]	chr16:55548084-55591614
ENSDART00000083830	50000	54839.7	44749.7	22714.4	26526.9	49863.1	24620.6	1.01748	0.0156221	sdc4	GO:0005546 (phosphatidylinositol-4,5-bisphosphate binding)	syndecan 4 [Source:ZFIN;Acc:ZDB-GENE-061111-1]	chr6:52615763-52628296
ENSDART00000143627	8462.31	468.522	1533.02	3.41585	2.75575	3487.95	3.0858	9.21631	0.0156487			cdna:known chromosome:Zv9:20:36701028:36703812:-1 gene:ENSDARG00000042864 gene_biotype:protein_coding transcript_biotype:retained_intron	chr20:36701028-36703812
ENSDART00000099978	1749.18	681.321	2953.99	94.2236	155.908	1794.83	125.066	3.64975	0.015675	pdlim4	GO:0005515 (protein binding)	PDZ and LIM domain 4 [Source:ZFIN;Acc:ZDB-GENE-070308-5]	chr21:42144176-42207289
ENSDART00000115192	6759.58	7079.78	492.032	6.51194	4.43346	4777.13	5.4727	9.05918	0.0157576	zcchc10	GO:0008270 (zinc ion binding)	zinc finger, CCHC domain containing 10 [Source:ZFIN;Acc:ZDB-GENE-030131-6172]	chr21:41576791-41583017
ENSDART00000154807	18.6625	9.61148	11.9511	36.2062	46.7511	13.4084	41.4787	-1.67391	0.0158228			havana:antisense chromosome:Zv9:23:30139029:30139613:-1 gene:ENSDARG00000097185 gene_biotype:antisense transcript_biotype:antisense	chr23:30139029-30139613
ENSDART00000143573	17.2184	5.01231	10.8868	65.4605	103.29	11.0392	84.3752	-3.0696	0.0158365	ncor1	GO:0003682 (chromatin binding)	nuclear receptor co-repressor 1 [Source:ZFIN;Acc:ZDB-GENE-040426-993]	chr5:43496834-43615097
ENSDART00000085294	14687.9	3338.68	2585	73.3859	71.0579	6870.52	72.2219	6.12027	0.0158397			cdna:known chromosome:Zv9:23:30244785:30248621:1 gene:ENSDARG00000060498 gene_biotype:protein_coding transcript_biotype:retained_intron	chr23:30244785-30248621
ENSDART00000103692	28274.6	13821.6	19837.6	102.946	45.7907	20644.6	74.3682	8.17124	0.0158467	si:ch211-105d11.2	GO:0016020 (membrane)	family with sequence similarity 210, member A [Source:HGNC Symbol;Acc:HGNC:28346]	chr19:13252540-13270534
ENSDART00000151472	20618.3	2747.68	19054.9	42.5186	9.29721	14140.3	25.9079	9.01109	0.0158481	nip7	GO:0003723 (RNA binding)	nuclear import 7 homolog (S. cerevisiae) [Source:ZFIN;Acc:ZDB-GENE-050522-256]	chr18:4479877-4486355
ENSDART00000100032	3297.79	7782.38	941.134	27.6709	33.1609	4007.1	30.4159	6.57632	0.016018	hyou1	GO:0000902 (cell morphogenesis)	hypoxia up-regulated 1 [Source:ZFIN;Acc:ZDB-GENE-030131-5344]	chr10:30661376-30682722
ENSDART00000033024	5.12574	8.12098	3.98946	20.0889	22.918	5.74539	21.5034	-1.96483	0.0160194	tmem41ab	GO:0003674 (molecular_function)	transmembrane protein 41ab [Source:ZFIN;Acc:ZDB-GENE-040426-2050]	chr1:29409597-29425490
ENSDART00000016350	9126.54	1805.01	19171.7	42.5253	34.5555	10034.4	38.5404	7.4729	0.0160228	pgam1b	GO:0004619 (phosphoglycerate mutase activity)	phosphoglycerate mutase 1b [Source:ZFIN;Acc:ZDB-GENE-030131-5376]	chr1:55247077-55258273
ENSDART00000144309	45117.4	49357.1	30299.9	15897.5	14490.9	41591.5	15194.2	1.42344	0.0160254	srsf3b	GO:0000166 (nucleotide binding)	serine/arginine-rich splicing factor 3b [Source:ZFIN;Acc:ZDB-GENE-071005-2]	chr22:588434-598136
ENSDART00000153538	20.2413	20.0889	27.8789	114.666	84.3292	22.7364	99.4978	-2.13008	0.0160408			cdna:putative chromosome:Zv9:6:26723383:26744218:1 gene:ENSDARG00000016429 gene_biotype:protein_coding transcript_biotype:processed_transcript	chr6:26723383-26744218
ENSDART00000015368	33644.9	17883.2	32229.3	68.4368	29.1627	27919.1	48.7997	9.23212	0.0160542	nop58		NOP58 ribonucleoprotein homolog (yeast) [Source:ZFIN;Acc:ZDB-GENE-040426-2140]	chr6:8031310-8062529
ENSDART00000145267	5505.39	5235.63	7953.91	14238.5	12510	6231.64	13374.3	-1.12474	0.0160743			havana:lincRNA chromosome:Zv9:19:41881778:41882818:-1 gene:ENSDARG00000092227 gene_biotype:lincRNA transcript_biotype:lincRNA	chr19:41881778-41882818
ENSDART00000081419	7.64343	11.9176	12.1745	28.0018	22.9489	10.5785	25.4753	-1.29222	0.0161223	si:dkey-211g8.7	GO:0004871 (signal transducer activity)	free fatty acid receptor 2 [Source:HGNC Symbol;Acc:HGNC:4501]	chr19:11246490-11249598
ENSDART00000152944	7827.09	831.73	3822.77	17.0588	18.2977	4160.53	17.6782	7.36853	0.0161284	sec63	GO:0008565 (protein transporter activity)	SEC63-like (S. cerevisiae) [Source:ZFIN;Acc:ZDB-GENE-040718-328]	chr20:32540629-32560854
ENSDART00000045040	102.576	89.1887	67.3909	38.3241	44.6014	86.3853	41.4628	1.04168	0.0161414	si:ch211-132f19.7	GO:0004016 (adenylate cyclase activity)	si:ch211-132f19.7 [Source:ZFIN;Acc:ZDB-GENE-130530-619]	chr17:33517542-33545238
ENSDART00000142631	4234.26	16308.1	11887.6	404.046	433.075	10810	418.561	4.48436	0.0161787			cdna:known chromosome:Zv9:24:22679169:22705711:-1 gene:ENSDARG00000000069 gene_biotype:protein_coding transcript_biotype:processed_transcript	chr24:22679169-22705711
ENSDART00000102993	157.262	425.19	1077.07	5.52631	5.65494	553.174	5.59062	6.21772	0.0161801	mettl14	GO:0016422 (mRNA (2'-O-methyladenosine-N6-)-methyltransferase activity)	methyltransferase like 14 [Source:ZFIN;Acc:ZDB-GENE-040426-2328]	chr1:18807188-18811849
ENSDART00000112845	93.1832	75.634	209.845	1277.17	1273.96	126.221	1275.56	-3.48487	0.0162008	zgc:195173	GO:0003674 (molecular_function)	zgc:195173 [Source:ZFIN;Acc:ZDB-GENE-081022-190]	chr24:34513414-34518763
ENSDART00000049063	4.93318	8.18071	67.5635	1127.89	2380.34	26.8925	1754.11	-6.87387	0.0162218	ankrd6b	GO:0005515 (protein binding)	ankyrin repeat domain 6b [Source:ZFIN;Acc:ZDB-GENE-030916-4]	chr20:1226689-1262912
ENSDART00000149256	12404.5	11539.8	1611.19	11.5837	47.871	8518.48	29.7274	8.02472	0.0162627	tsr1	GO:0005634 (nucleus)	TSR1, 20S rRNA accumulation, homolog (yeast) [Source:ZFIN;Acc:ZDB-GENE-030131-3762]	chr15:24970133-24991138
ENSDART00000156846	16.5251	7.32603	8.69563	58.1646	97.2624	10.8489	77.7135	-2.8863	0.016305	mespbb	GO:0046983 (protein dimerization activity)	mesoderm posterior bb [Source:ZFIN;Acc:ZDB-GENE-110609-1]	chr25:11392554-11393558
ENSDART00000106436	2288.38	2916.78	1921.17	6318.62	5025.98	2375.44	5672.3	-1.26761	0.0163211	zgc:171318	GO:0046872 (metal ion binding)	zgc:171318 [Source:ZFIN;Acc:ZDB-GENE-071004-83]	chr22:1289367-1350251
ENSDART00000146507	3433.19	7300.2	3799.29	1325.25	963.886	4844.23	1144.57	2.01447	0.0163513			havana:processed_transcript chromosome:Zv9:9:37847028:37850137:1 gene:ENSDARG00000093486 gene_biotype:processed_transcript transcript_biotype:processed_transcript	chr9:37847028-37850137
ENSDART00000122443	1461.51	1005.62	1196.66	3700.38	4918.25	1221.27	4309.32	-1.82139	0.0163569			ncrna:rRNA chromosome:Zv9:21:42870861:42870978:1 gene:ENSDARG00000091416 gene_biotype:rRNA transcript_biotype:rRNA	chr21:42870861-42870978
ENSDART00000144498	1908.39	1521.59	2405.75	6145.88	4702.54	1945.24	5424.21	-1.49172	0.0163639			havana:processed_transcript chromosome:Zv9:9:42632398:42634541:-1 gene:ENSDARG00000094108 gene_biotype:processed_transcript transcript_biotype:processed_transcript	chr9:42632398-42634541
ENSDART00000125860	76413.6	50573.7	43495.4	6497.91	10067.9	56827.6	8282.91	2.77045	0.0163924	nfe2	GO:0046982 (protein heterodimerization activity)	nuclear factor, erythroid-derived 2 [Source:ZFIN;Acc:ZDB-GENE-030124-1]	chr23:36360868-36367896
ENSDART00000120748	14.1422	35.2399	11.8751	227.135	240.28	20.4191	233.707	-3.69101	0.0164052			ncrna:rRNA chromosome:Zv9:2:27381836:27381951:-1 gene:ENSDARG00000085348 gene_biotype:rRNA transcript_biotype:rRNA	chr2:27381836-27381951
ENSDART00000143111	22.335	4.11956	93.9507	8050.04	2333.03	40.1351	5191.54	-7.7222	0.0164277	si:dkey-217f16.1	GO:0005525 (GTP binding)	si:dkey-217f16.1 [Source:ZFIN;Acc:ZDB-GENE-091116-95]	chr3:4252087-4263996
ENSDART00000089546	19.5562	4.57711	79.4786	8770.51	10336.9	34.5373	9553.7	-8.95148	0.0164278	abi3bp	GO:0005515 (protein binding)	ABI family, member 3 (NESH) binding protein [Source:ZFIN;Acc:ZDB-GENE-030131-6041]	chr22:30094342-30130582
ENSDART00000138066	19149.5	26233	15985.1	4427.07	3019.03	20455.9	3723.05	2.45351	0.0164308			havana:processed_transcript chromosome:Zv9:14:18736625:18738098:1 gene:ENSDARG00000093678 gene_biotype:processed_transcript transcript_biotype:retained_intron	chr14:18736625-18738098
ENSDART00000155148	290.064	88.7759	73.1906	1167.55	2080.56	150.677	1624.06	-3.65738	0.0164456	si:ch73-31d8.2		si:ch73-31d8.2 [Source:ZFIN;Acc:ZDB-GENE-030131-8387]	chr16:52087214-52090247
ENSDART00000033871	3282.51	5531.24	12487.1	739.669	406.293	7100.29	572.981	3.47549	0.0164543	ap2s1	GO:0008565 (protein transporter activity)	adaptor-related protein complex 2, sigma 1 subunit [Source:ZFIN;Acc:ZDB-GENE-040426-2174]	chr15:8902966-8935293
ENSDART00000138658	2129.13	1540.15	623.688	13889.4	8567.62	1430.99	11228.5	-3.10333	0.0165093			cdna:known chromosome:Zv9:5:32246855:32247555:1 gene:ENSDARG00000094286 gene_biotype:protein_coding transcript_biotype:processed_transcript	chr5:32246855-32247555
ENSDART00000131019	29.5686	15.5028	13.6516	4752.95	2032.26	19.5743	3392.6	-7.39792	0.0165316	acadvl	GO:0003995 (acyl-CoA dehydrogenase activity)	acyl-Coenzyme A dehydrogenase, very long chain [Source:ZFIN;Acc:ZDB-GENE-030131-899]	chr7:21455929-21491112
ENSDART00000156950	184.352	91.123	749.748	12267.3	7094.27	341.741	9680.8	-5.32538	0.0165432			havana:lincRNA chromosome:Zv9:4:10826621:10836508:1 gene:ENSDARG00000096099 gene_biotype:lincRNA transcript_biotype:lincRNA	chr4:10826621-10836508
ENSDART00000057640	1195.87	521.675	521.85	4498.07	2991.2	746.464	3744.63	-2.41469	0.0165924	dhrs7ca	GO:0016491 (oxidoreductase activity)	dehydrogenase/reductase (SDR family) member 7Ca [Source:ZFIN;Acc:ZDB-GENE-050320-114]	chr3:59497988-59514355
GENSCAN00000011430	1346.9	4289.77	5460.94	186.284	150.49	3699.2	168.387	4.23824	0.0165981			cdna:genscan chromosome:Zv9:22:25402411:25419171:-1 transcript_biotype:protein_coding	chr22:25402411-25419171
ENSDART00000131916	24.6627	11.3353	20.8099	61.2204	83.8653	18.936	72.5428	-1.99423	0.0166205	si:ch211-214c11.8	GO:0000166 (nucleotide binding)	si:ch211-214c11.8 [Source:ZFIN;Acc:ZDB-GENE-060503-590]	chr19:24011620-24012900
ENSDART00000138786	7492.94	2192.2	313.004	2.77436	4.53844	3332.71	3.6564	8.926	0.0166262	ponzr1		plac8 onzin related protein 1 [Source:ZFIN;Acc:ZDB-GENE-070727-1]	chr7:21501628-21527465
ENSDART00000098520	1842.47	1511.6	14645.6	25.9861	74.4817	5999.9	50.2339	6.28992	0.0166536	fzd10	GO:0005515 (protein binding)	frizzled homolog 10 [Source:ZFIN;Acc:ZDB-GENE-990415-220]	chr8:45838010-45840991
ENSDART00000108949	98.1475	66.2469	44.2973	334.304	232.077	69.5639	283.191	-2.07647	0.0167026		GO:0008009 (chemokine activity)	Uncharacterized protein [Source:UniProtKB/TrEMBL;Acc:E7F9L9]	chr13:30916271-30922724
ENSDART00000143527	5187.11	5006.93	7646.93	14262.2	12939	5946.99	13600.6	-1.21931	0.0167029			havana:processed_transcript chromosome:Zv9:22:39891584:39892497:-1 gene:ENSDARG00000093938 gene_biotype:processed_transcript transcript_biotype:processed_transcript	chr22:39891584-39892497
ENSDART00000139955	5688.55	5557.77	8551.51	15836.2	13293.5	6599.28	14564.9	-1.16599	0.0167616			havana:processed_transcript chromosome:Zv9:6:19119207:19120414:-1 gene:ENSDARG00000094642 gene_biotype:processed_transcript transcript_biotype:processed_transcript	chr6:19119207-19120414
ENSDART00000157289	6.76521	6.17686	4.68905	2.68506	2.83698	5.87704	2.76102	1.07344	0.0167742			cdna:known chromosome:Zv9:17:34345322:34349960:1 gene:ENSDARG00000089076 gene_biotype:protein_coding transcript_biotype:retained_intron	chr17:34345322-34349960
ENSDART00000141075	2.72721	2.80226	2.75663	1842.13	1313.13	2.76203	1577.63	-9.13734	0.0167751	kif1b	GO:0005515 (protein binding)	kinesin family member 1B [Source:ZFIN;Acc:ZDB-GENE-030820-1]	chr23:29639078-29748537
ENSDART00000133110	1242.16	1189.41	1830.97	3388.18	3044.11	1420.84	3216.15	-1.2047	0.0168021	si:ch211-214c20.1	GO:0005515 (protein binding)	si:ch211-214c20.1 [Source:ZFIN;Acc:ZDB-GENE-081103-49]	chr4:28912138-28929400
ENSDART00000126768	387.955	708.188	189.336	29.7339	51.014	428.493	40.374	3.26075	0.0168415	cc2d2a	GO:0005515 (protein binding)	coiled-coil and C2 domain containing 2A [Source:ZFIN;Acc:ZDB-GENE-030131-2291]	chr23:2209630-2273572
ENSDART00000128739	68.9278	126.604	73.823	25.9156	23.2127	89.7848	24.5641	1.8161	0.016849			ncrna:rRNA chromosome:Zv9:9:27752337:27752451:1 gene:ENSDARG00000089778 gene_biotype:rRNA transcript_biotype:rRNA	chr9:27752337-27752451
ENSDART00000124392	18.8339	47.8335	26.7412	269.873	508.995	31.1362	389.434	-3.68176	0.0168798			ncrna:rRNA chromosome:Zv9:10:20565019:20565135:-1 gene:ENSDARG00000087716 gene_biotype:rRNA transcript_biotype:rRNA	chr10:20565019-20565135
ENSDART00000150747	181.84	95.6085	792.819	12775	7349.38	356.756	10062.2	-5.33674	0.0169106			havana:lincRNA chromosome:Zv9:4:10832785:10836764:1 gene:ENSDARG00000096099 gene_biotype:lincRNA transcript_biotype:lincRNA	chr4:10832785-10836764
ENSDART00000059628	228.733	455.596	63.1603	28289.2	8815.35	249.163	18552.3	-6.39686	0.0169709	nab1b	GO:0005634 (nucleus)	NGFI-A binding protein 1b (EGR1 binding protein 1) [Source:ZFIN;Acc:ZDB-GENE-081105-85]	chr9:42440891-42474607
ENSDART00000109935	11.536	16.6732	17.6917	45.4215	62.1696	15.3003	53.7955	-1.82088	0.0170013	lonrf1	GO:0005515 (protein binding)	LON peptidase N-terminal domain and ring finger 1 [Source:ZFIN;Acc:ZDB-GENE-101021-4]	chr14:35154723-35176681
ENSDART00000017053	808.493	517.9	157.236	11.8971	10.5921	494.543	11.2446	5.16875	0.0170167	cttn	GO:0005515 (protein binding)	cortactin [Source:ZFIN;Acc:ZDB-GENE-040715-3]	chr18:49869166-49876923
GENSCAN00000026401	15970.7	20390.5	24980.7	39006.8	46104.6	20447.3	42555.7	-1.07627	0.0170402			cdna:genscan chromosome:Zv9:4:31672989:31697551:-1 transcript_biotype:protein_coding	chr4:31672989-31697551
ENSDART00000144494	74.6798	431.389	170.997	4357.76	11595.9	225.689	7976.83	-5.33091	0.0170662	si:dkey-78l4.4	GO:0004252 (serine-type endopeptidase activity)		chr22:19733409-19736079
ENSDART00000156120	236.392	146.256	1513.21	2.84547	4.20039	631.954	3.52293	6.75734	0.0170797	cd3eap		CD3e molecule, epsilon associated protein [Source:ZFIN;Acc:ZDB-GENE-101202-2]	chr15:28135771-28151144
ENSDART00000065447	7797.49	50611	9760.91	422.615	296.225	22723.1	359.42	5.46938	0.0171027			cdna:known chromosome:Zv9:21:28918277:28925825:-1 gene:ENSDARG00000005551 gene_biotype:protein_coding transcript_biotype:processed_transcript	chr21:28918277-28925825
ENSDART00000081601	8789.86	13590.3	24001.2	86.1715	213.948	15460.5	150.06	6.70912	0.017123	cept1a	GO:0016740 (transferase activity)	choline/ethanolamine phosphotransferase 1a [Source:ZFIN;Acc:ZDB-GENE-081105-47]	chr8:13471886-13488526
ENSDART00000129033	570.961	760.65	142.19	13.7701	20.2301	491.267	17.0001	4.56572	0.0171387	sb:cb827		sb:cb827 [Source:ZFIN;Acc:ZDB-GENE-031002-40]	chr11:26248498-26250911
ENSDART00000131443	7875.93	517.523	11091.9	2.72341	3.46963	6495.12	3.09652	10.1785	0.0171594	dpm2	GO:0030176 (integral component of endoplasmic reticulum membrane)	dolichol-phosphate (beta-D) mannosyltransferase 2 [Source:ZFIN;Acc:ZDB-GENE-030131-9093]	chr5:33351973-33354328
ENSDART00000138831	1042.52	2249.12	131.35	2.8286	5.3794	1141	4.104	7.43566	0.0171761	gnpnat1	GO:0008080 (N-acetyltransferase activity)	glucosamine-phosphate N-acetyltransferase 1 [Source:ZFIN;Acc:ZDB-GENE-050522-450]	chr17:15054735-15061179
ENSDART00000137129	610.625	856.353	1097.09	2902.33	2778.19	854.69	2840.26	-1.77291	0.0172771			cdna:pseudogene chromosome:Zv9:24:27438501:27444625:-1 gene:ENSDARG00000092049 gene_biotype:processed_pseudogene transcript_biotype:processed_pseudogene	chr24:27438501-27444625
ENSDART00000129014	49605.2	48506.2	37252.6	20753.9	16682.9	45121.3	18718.4	1.26612	0.017279	hsp90ab1	GO:0051082 (unfolded protein binding)	heat shock protein 90, alpha (cytosolic), class B member 1 [Source:ZFIN;Acc:ZDB-GENE-990415-95]	chr20:51532469-51546551
ENSDART00000145148	1328.09	20153.7	1092.91	2.69044	3.04758	7524.89	2.86901	10.0715	0.0173313	ccdc43		coiled-coil domain containing 43 [Source:ZFIN;Acc:ZDB-GENE-040426-1587]	chr3:31737569-31742307
ENSDART00000135576	74.2413	65.5243	48.8979	344.591	244.568	62.8878	294.579	-2.22815	0.017334	inpp4aa		inositol polyphosphate-4-phosphatase, type Ia [Source:ZFIN;Acc:ZDB-GENE-060312-5]	chr9:7039613-7109774
ENSDART00000098408	20930.5	19626.7	13016.4	4791.76	3335.83	17857.9	4063.8	2.12888	0.0173383	hnrnpabb	GO:0000166 (nucleotide binding)	heterogeneous nuclear ribonucleoprotein A/Bb [Source:ZFIN;Acc:ZDB-GENE-040426-2516]	chr21:3192725-3199941
ENSDART00000016612	431.474	226.34	1615.73	7.50544	8.55596	757.849	8.0307	6.07538	0.017346	spop	GO:0005515 (protein binding)	speckle-type POZ protein [Source:ZFIN;Acc:ZDB-GENE-040426-1378]	chr3:20547488-20779739
ENSDART00000150181	5326.57	5046.5	8100.73	15383.9	13469.6	6157.93	14426.8	-1.25865	0.0174026			havana:lincRNA chromosome:Zv9:22:6089891:6090839:1 gene:ENSDARG00000095814 gene_biotype:lincRNA transcript_biotype:lincRNA	chr22:6089891-6090839
ENSDART00000052005	7699.99	4093.71	7963.9	7.10258	2.72191	6585.87	4.91225	10.4866	0.0174419	ostc		oligosaccharyltransferase complex subunit [Source:ZFIN;Acc:ZDB-GENE-040426-1079]	chr7:65684911-65692168
ENSDART00000127700	50.3133	11.3562	6.77766	777.157	508.704	22.8157	642.931	-5.32335	0.0174552				chr9:58067452-58076477
ENSDART00000111964	2.86242	2.80866	61.8487	17205.5	16767	22.5066	16986.2	-11.066	0.0174633	hmgb1a	GO:0003677 (DNA binding)	high-mobility group box 1a [Source:ZFIN;Acc:ZDB-GENE-030131-341]	chr10:37242189-37246980
ENSDART00000146467	387.804	26.9315	18.7595	24038.2	7308.47	144.498	15673.4	-7.83421	0.0174705	stat6	GO:0004871 (signal transducer activity)	signal transducer and activator of transcription 6, interleukin-4 induced [Source:ZFIN;Acc:ZDB-GENE-030131-9359]	chr23:27319750-27363817
ENSDART00000018423	60116.9	40198.6	54678.8	22987.1	24925.8	51664.8	23956.5	1.0894	0.0175015	ywhaqb	GO:0004497 (monooxygenase activity)	tyrosine 3-monooxygenase/tryptophan 5-monooxygenase activation protein, theta polypeptide b [Source:ZFIN;Acc:ZDB-GENE-030131-7135]	chr17:32706145-32731407
ENSDART00000099315	10431.9	10700.1	6015.9	2364.57	1588.85	9049.3	1976.71	2.17564	0.0175716	cebpz	GO:0005488 (binding)	CCAAT/enhancer binding protein (C/EBP), zeta [Source:ZFIN;Acc:ZDB-GENE-050417-261]	chr20:3329076-3348862
ENSDART00000121047	12.3005	18.066	36.8546	2.74923	3.79239	22.407	3.27081	2.64214	0.0175746			ncrna:rRNA chromosome:Zv9:24:31902216:31902331:-1 gene:ENSDARG00000085647 gene_biotype:rRNA transcript_biotype:rRNA	chr24:31902216-31902331
ENSDART00000131810	5806.48	5600.91	8619.01	15388.3	13374.8	6675.46	14381.6	-1.13232	0.0175887			havana:processed_transcript chromosome:Zv9:8:7462422:7464481:-1 gene:ENSDARG00000093762 gene_biotype:processed_transcript transcript_biotype:processed_transcript	chr8:7462422-7464481
ENSDART00000134633	1385.44	518.555	4065.32	48.6677	31.385	1989.77	40.0264	5.19277	0.0175974	si:dkey-40c11.2	GO:0005515 (protein binding)	si:dkey-40c11.2 [Source:ZFIN;Acc:ZDB-GENE-060526-300]	chr5:45149007-45226862
ENSDART00000135939	306.193	101.38	84.0476	1835.32	1363.72	163.874	1599.52	-3.52255	0.0176117	taar19s	GO:0004871 (signal transducer activity)	trace amine associated receptor 19s [Source:ZFIN;Acc:ZDB-GENE-060413-14]	chr10:42012893-42013924
ENSDART00000139951	5120.84	1788.64	2625.47	164.495	319.582	3178.32	242.039	3.65408	0.0176237			havana:lincRNA chromosome:Zv9:1:6993884:6996637:1 gene:ENSDARG00000095344 gene_biotype:lincRNA transcript_biotype:lincRNA	chr1:6993884-6996637
ENSDART00000146373	18863.1	23223.3	3154.23	176.114	133.796	15080.2	154.955	6.18108	0.0176386	nasp	GO:0005515 (protein binding)	nuclear autoantigenic sperm protein (histone-binding) [Source:ZFIN;Acc:ZDB-GENE-030131-5511]	chr6:33608799-33614433
ENSDART00000129404	82.4784	58.1047	45.7978	143.129	174.353	62.127	158.741	-1.38894	0.0176657			ensembl:lincRNA chromosome:Zv9:15:30752934:30755146:1 gene:ENSDARG00000041007 gene_biotype:lincRNA transcript_biotype:lincRNA	chr15:30752934-30755146
ENSDART00000141168	523.293	303.953	162.099	28.7275	33.77	329.782	31.2488	3.24562	0.0176793			cdna:known chromosome:Zv9:1:18720297:18726072:1 gene:ENSDARG00000061880 gene_biotype:protein_coding transcript_biotype:processed_transcript	chr1:18720297-18726072
ENSDART00000077278	1334.29	3548.37	1867.24	15080.4	9564.22	2249.97	12322.3	-2.53808	0.0176797	zgc:66475	GO:0003904 (deoxyribodipyrimidine photo-lyase activity)	zgc:66475 [Source:ZFIN;Acc:ZDB-GENE-040426-1644]	chr2:13740444-13773949
ENSDART00000144148	1267.77	2796.69	1771.4	7935.68	5873.27	1945.29	6904.47	-1.88762	0.0176858	zgc:174222	GO:0046872 (metal ion binding)	zgc:174222 [Source:ZFIN;Acc:ZDB-GENE-080220-40]	chr22:2687572-2694929
ENSDART00000147564	11803.7	8592.68	16836	132.125	61.9823	12410.8	97.0534	7.04527	0.0177082	mta2	GO:0003682 (chromatin binding)	metastasis associated 1 family, member 2 [Source:ZFIN;Acc:ZDB-GENE-030131-4803]	chr7:19154527-19190559
ENSDART00000051526	3.60959	4.3586	2.93688	6.82055	8.30962	3.63502	7.56509	-1.06901	0.0177265	jmjd7	GO:0005515 (protein binding)	jumonji domain containing 7 [Source:ZFIN;Acc:ZDB-GENE-050417-86]	chr17:10572518-10598922
ENSDART00000029843	7023.75	362.443	2643.08	5.78229	9.69087	3343.09	7.73658	7.97841	0.0177964	vezf1a	GO:0046872 (metal ion binding)	vascular endothelial zinc finger 1a [Source:ZFIN;Acc:ZDB-GENE-040108-4]	chr10:38416881-38465277
ENSDART00000143114	5.96288	2.8006	5.27469	14.9171	21.1159	4.67939	18.0165	-1.99597	0.0178443	si:dkeyp-20e4.8		si:dkeyp-20e4.8 [Source:ZFIN;Acc:ZDB-GENE-050208-356]	chr22:25613374-25614100
ENSDART00000145713	4906.12	1739.04	2517.53	149.874	294.287	3054.23	222.081	3.7264	0.0179205			havana:lincRNA chromosome:Zv9:1:6995360:6996637:1 gene:ENSDARG00000095344 gene_biotype:lincRNA transcript_biotype:lincRNA	chr1:6995360-6996637
ENSDART00000111541	1528.11	16052.2	19428	13.3712	60.9353	12336.1	37.1532	8.09616	0.0179538	tpra	GO:0005643 (nuclear pore)	translocated promoter region a (to activated MET oncogene) [Source:ZFIN;Acc:ZDB-GENE-081104-2]	chr2:20584192-20662758
ENSDART00000120947	4366.12	4361.21	6580.58	10072.5	11607.7	5102.64	10840.1	-1.11158	0.0179635			ncrna:rRNA chromosome:Zv9:19:8090737:8090852:-1 gene:ENSDARG00000085547 gene_biotype:rRNA transcript_biotype:rRNA	chr19:8090737-8090852
ENSDART00000120692	2238.61	2510.15	3307.75	6160.02	6219.66	2685.5	6189.84	-1.22448	0.0179923			ncrna:rRNA chromosome:Zv9:2:23111019:23111135:1 gene:ENSDARG00000085292 gene_biotype:rRNA transcript_biotype:rRNA	chr2:23111019-23111135
ENSDART00000133709	57.0067	80.6186	46.4552	21.5473	15.6691	61.3602	18.6082	1.70165	0.0180251	ptprfb	GO:0005515 (protein binding)	protein tyrosine phosphatase, receptor type, f, b [Source:ZFIN;Acc:ZDB-GENE-060503-530]	chr2:17349918-17718646
ENSDART00000131740	181.337	423.498	401.547	1769.89	1237.47	335.46	1503.68	-2.23859	0.0180466	si:dkey-77f5.5	GO:0046872 (metal ion binding)	si:dkey-77f5.5 [Source:ZFIN;Acc:ZDB-GENE-131120-161]	chr15:997631-1025333
ENSDART00000122601	8621.64	1799.68	18721.4	48.2516	43.0305	9714.25	45.6411	7.18333	0.0180496	pgam1b	GO:0004619 (phosphoglycerate mutase activity)	phosphoglycerate mutase 1b [Source:ZFIN;Acc:ZDB-GENE-030131-5376]	chr1:55247077-55258273
ENSDART00000142306	40914.1	25431.4	13496.8	4210.65	2467.33	26614.1	3338.99	2.90404	0.0180615	xpot	GO:0005488 (binding)	exportin, tRNA (nuclear export receptor for tRNAs) [Source:ZFIN;Acc:ZDB-GENE-041210-4]	chr4:356400-383176
ENSDART00000136557	4.86335	21.9187	42.2506	642.615	2014.57	23.0109	1328.59	-6.10639	0.0180716	si:dkey-19p15.5	GO:0004713 (protein tyrosine kinase activity)	si:dkey-19p15.5 [Source:ZFIN;Acc:ZDB-GENE-081028-8]	chr13:8411930-8415116
ENSDART00000053642	14154.9	10710.2	1541.69	83.3781	189.804	8802.28	136.591	5.61369	0.0181538	ensaa	GO:0019212 (phosphatase inhibitor activity)	endosulfine alpha a [Source:ZFIN;Acc:ZDB-GENE-060503-181]	chr19:351956-354050
ENSDART00000104687	19691.3	25800.8	15259.2	8138.86	6155.87	20250.4	7147.37	1.48342	0.0181984	pfn2	GO:0003779 (actin binding)	profilin 2 [Source:ZFIN;Acc:ZDB-GENE-040115-4]	chr22:38065111-38079706
ENSDART00000143369	3228.83	31125.3	44241	108.413	243.516	26198.4	175.964	6.6611	0.0182057			cdna:known chromosome:Zv9:6:49036236:49044566:1 gene:ENSDARG00000020893 gene_biotype:protein_coding transcript_biotype:processed_transcript	chr6:49036236-49044566
ENSDART00000097741	2.73082	10.0776	3.95826	57.102	33.5252	5.58888	45.3136	-3.19556	0.0182202	ssbp3a	GO:0005515 (protein binding)	single stranded DNA binding protein 3a [Source:ZFIN;Acc:ZDB-GENE-070705-484]	chr2:10725784-10818715
ENSDART00000143118	354.295	289.762	474.2	1037.33	1037.63	372.752	1037.48	-1.50657	0.0182375	bai1b	GO:0004888 (transmembrane signaling receptor activity)	brain-specific angiogenesis inhibitor 1b [Source:ZFIN;Acc:ZDB-GENE-081031-45]	chr19:18332-30371
ENSDART00000033152	2206	12974.3	381.436	13.0719	4.3968	5187.25	8.73434	8.19287	0.018246	rab35b	GO:0000166 (nucleotide binding)	RAB35, member RAS oncogene family b [Source:ZFIN;Acc:ZDB-GENE-040801-62]	chr8:3844259-3870138
ENSDART00000142522	484.757	11405.5	1346.9	3.82968	2.78978	4412.38	3.30973	9.22264	0.018248	si:dkey-161j23.8		integrin alpha FG-GAP repeat containing 3 [Source:HGNC Symbol;Acc:HGNC:14163]	chr24:41189117-41210377
ENSDART00000035581	84.1567	111.631	63.0939	25.3973	26.1479	86.2939	25.7726	1.70473	0.0182486			otopetrin 1 [Source:HGNC Symbol;Acc:HGNC:19656]	chr14:127381-135940
ENSDART00000133531	20234.8	483.355	4267.22	3.53903	15.3676	8328.45	9.45331	8.8776	0.0182515	cib1	GO:0005509 (calcium ion binding)	calcium and integrin binding 1 (calmyrin) [Source:ZFIN;Acc:ZDB-GENE-050417-170]	chr25:3190783-3284983
ENSDART00000151958	166.236	135.322	79.9625	597.119	594.84	127.174	595.98	-2.29292	0.0182783	si:dkey-27a13.3		collagen, type XVI, alpha 1 [Source:ZFIN;Acc:ZDB-GENE-060503-351]	chr19:40022486-40173904
ENSDART00000132386	2936.54	2104.72	1884.27	5503.86	4500.75	2308.51	5002.31	-1.13472	0.018287	si:dkey-21e2.15	GO:0004252 (serine-type endopeptidase activity)		chr22:19608015-19609590
ENSDART00000100386	3.63613	4.7712	2.82502	1912.73	4157.29	3.74412	3035.01	-9.58975	0.0183618	mstnb	GO:0005125 (cytokine activity)	myostatin b [Source:ZFIN;Acc:ZDB-GENE-990415-165]	chr9:42012379-42016180
ENSDART00000143575	3558.3	7363.13	3810.44	1341.1	916.277	4910.62	1128.69	2.06518	0.0183706			havana:processed_transcript chromosome:Zv9:9:37847028:37850084:1 gene:ENSDARG00000093486 gene_biotype:processed_transcript transcript_biotype:processed_transcript	chr9:37847028-37850084
ENSDART00000142886	5.40476	3.31922	111.824	2970.53	12391.4	40.1828	7680.97	-8.91006	0.0183801	nisch	GO:0035091 (phosphatidylinositol binding)	nischarin [Source:ZFIN;Acc:ZDB-GENE-050208-570]	chr22:10471320-10507830
ENSDART00000157013	938.238	260.039	391.784	5700.92	3205.34	530.02	4453.13	-3.22485	0.0184112			havana:lincRNA chromosome:Zv9:9:1631952:1639091:-1 gene:ENSDARG00000097886 gene_biotype:lincRNA transcript_biotype:lincRNA	chr9:1631952-1639091
ENSDART00000145963	5240.55	4599.32	7451.26	13778.1	12226.5	5763.71	13002.3	-1.20191	0.018417			havana:processed_transcript chromosome:Zv9:6:15572729:15574064:-1 gene:ENSDARG00000094142 gene_biotype:processed_transcript transcript_biotype:processed_transcript	chr6:15572729-15574064
ENSDART00000131769	53.9413	38.5251	45.6786	242.149	178.238	46.0483	210.193	-2.18721	0.0184652	v2rh9	GO:0004930 (G-protein coupled receptor activity)	vomeronasal 2 receptor, h9 [Source:ZFIN;Acc:ZDB-GENE-050419-176]	chr18:31696158-31702127
ENSDART00000122276	2.70496	69.0661	4.3054	4640.74	1388.12	25.3588	3014.43	-8.09231	0.0184896			ncrna:miRNA chromosome:Zv9:10:36849890:36849983:1 gene:ENSDARG00000089119 gene_biotype:miRNA transcript_biotype:miRNA	chr10:36849890-36849983
ENSDART00000082093	5349.31	1265.19	13437.6	37.2299	8.45375	6684.03	22.8418	7.98577	0.0184987	vps25		vacuolar protein sorting 25 (yeast) [Source:ZFIN;Acc:ZDB-GENE-050506-30]	chr12:4304206-4312087
ENSDART00000054013	1462.37	904.474	4613.8	81.9692	66.8306	2326.88	74.3999	4.62586	0.0185209	atp6ap1b	GO:0046933 (proton-transporting ATP synthase activity, rotational mechanism)	ATPase, H+ transporting, lysosomal accessory protein 1b [Source:ZFIN;Acc:ZDB-GENE-020423-2]	chr23:26366806-26381517
ENSDART00000104793	6011.91	3390.14	6909.4	439.911	759.293	5437.15	599.602	3.17024	0.0185335	si:rp71-1k13.6	GO:0005515 (protein binding)	si:rp71-1k13.6 [Source:ZFIN;Acc:ZDB-GENE-090312-52]	chr23:16931696-16939962
ENSDART00000122234	3092.81	4021.1	2819.79	7396.44	9448.77	3311.23	8422.61	-1.35278	0.0185802	si:ch211-71n6.4	GO:0016787 (hydrolase activity)	si:ch211-71n6.4 [Source:ZFIN;Acc:ZDB-GENE-091204-213]	chr18:43302380-43323277
ENSDART00000131801	4.93403	69.9289	3.87115	4808.28	2841.09	26.2447	3824.69	-8.39065	0.0185889			havana:processed_transcript chromosome:Zv9:22:15140971:15141468:1 gene:ENSDARG00000092082 gene_biotype:processed_transcript transcript_biotype:processed_transcript	chr22:15140971-15141468
ENSDART00000129722	8.7087	10.7748	5.91549	2.79069	3.45894	8.46633	3.12481	1.40337	0.0186101	traf3ip2l		TRAF3 interacting protein 2-like [Source:ZFIN;Acc:ZDB-GENE-110919-1]	chr6:36826540-36845591
GENSCAN00000025874	1082.82	495.66	177.997	7231.48	11341	585.494	9286.24	-4.30817	0.0186144			cdna:genscan scaffold:Zv9:Zv9_scaffold3503:351785:358634:-1 transcript_biotype:protein_coding
ENSDART00000016502	2585.85	28404.3	16257.5	65.0763	80.9813	15749.2	73.0288	7.19123	0.0186173	dlat	GO:0004738 (pyruvate dehydrogenase activity)	dihydrolipoamide S-acetyltransferase (E2 component of pyruvate dehydrogenase complex) [Source:ZFIN;Acc:ZDB-GENE-030131-2921]	chr21:22135501-22149939
ENSDART00000126105	6.06303	60.2335	4.3768	2581.94	1608.32	23.5578	2095.13	-7.44532	0.018626			cdna:known chromosome:Zv9:10:36176538:36179966:1 gene:ENSDARG00000043209 gene_biotype:protein_coding transcript_biotype:processed_transcript	chr10:36176538-36179966
ENSDART00000147051	3.99877	33.1737	31.5852	646.897	2015.18	22.9192	1331.04	-6.14615	0.0186282	si:dkey-19p15.5	GO:0004713 (protein tyrosine kinase activity)	si:dkey-19p15.5 [Source:ZFIN;Acc:ZDB-GENE-081028-8]	chr13:8457417-8460601
ENSDART00000144413	596.125	526.181	1374.22	3481.26	4694.95	832.174	4088.1	-2.42005	0.0186978	si:dkey-236a14.4	GO:0016740 (transferase activity)	si:dkey-236a14.4 [Source:ZFIN;Acc:ZDB-GENE-070912-463]	chr2:18489887-18491896
ENSDART00000056291	278.474	750.443	402.668	3170.82	3408.78	477.195	3289.8	-2.90736	0.0187167	klf6b	GO:0046872 (metal ion binding)	Kruppel-like factor 6b [Source:ZFIN;Acc:ZDB-GENE-070912-633]	chr2:48188415-48196354
ENSDART00000126132	3.52229	4.47162	4.35347	791.584	487.514	4.11579	639.549	-7.24579	0.0187326	mtmr3	GO:0016787 (hydrolase activity)	myotubularin related protein 3 [Source:ZFIN;Acc:ZDB-GENE-091204-465]	chr8:4128473-4231384
ENSDART00000135568	5.48601	4.52089	8.00922	223.047	122.696	6.00538	172.871	-4.8254	0.0187784	rhoad	GO:0005525 (GTP binding)	ras homolog gene family, member Ad [Source:ZFIN;Acc:ZDB-GENE-040718-144]	chr8:28408257-28477272
ENSDART00000142784	391.344	20591.7	3550.71	2.80803	7.75129	8177.91	5.27966	9.35666	0.0188023	cnp	GO:0004113 (2',3'-cyclic-nucleotide 3'-phosphodiesterase activity)	2',3'-cyclic nucleotide 3' phosphodiesterase [Source:ZFIN;Acc:ZDB-GENE-030521-29]	chr3:17662020-17673215
ENSDART00000113703	5580.55	5373.13	336.407	6.00091	11.3427	3763.36	8.67183	8.03283	0.0188032			Uncharacterized protein [Source:UniProtKB/TrEMBL;Acc:E7FBY2]	chr22:8912748-8914698
ENSDART00000007735	6155.87	538.146	496.922	2.83624	12.0997	2396.98	7.46798	7.65505	0.018816	ust	GO:0001733 (galactosylceramide sulfotransferase activity)	uronyl-2-sulfotransferase [Source:ZFIN;Acc:ZDB-GENE-041001-163]	chr20:31335272-31453298
ENSDART00000117473	497.483	2146.2	1768.41	50.1082	57.6143	1470.7	53.8613	4.52377	0.0188398			ncrna:snoRNA chromosome:Zv9:21:39237096:39237170:1 gene:ENSDARG00000080775 gene_biotype:snoRNA transcript_biotype:snoRNA	chr21:39237096-39237170
ENSDART00000091606	58.3665	36.7965	55.0883	135.339	129.678	50.0838	132.508	-1.4322	0.0189426	si:dkey-246g23.2		si:dkey-246g23.2 [Source:ZFIN;Acc:ZDB-GENE-050419-100]	chr18:13928396-14007306
ENSDART00000133306	8.76468	31.11	43.1855	683.329	1974.39	27.6867	1328.86	-5.67399	0.0190019	si:dkey-112g5.5	GO:0016740 (transferase activity)	si:dkey-112g5.5 [Source:ZFIN;Acc:ZDB-GENE-081028-3]	chr13:8436821-8440005
ENSDART00000111388	33.1251	42.0831	28.4054	15.9107	15.3691	34.5379	15.6399	1.1241	0.0190073	igdcc3	GO:0005515 (protein binding)	immunoglobulin superfamily, DCC subclass, member 3 [Source:ZFIN;Acc:ZDB-GENE-080303-24]	chr7:32836048-32952721
ENSDART00000031650	34873.8	22135.2	23054	12839.1	10674.7	26687.7	11756.9	1.15713	0.019023	hsp70l	GO:0005515 (protein binding)	heat shock cognate 70-kd protein, like [Source:ZFIN;Acc:ZDB-GENE-050321-1]	chr8:5006699-5009452
ENSDART00000142717	77690.4	55835.4	67567	28689.6	22548.7	67030.9	25619.1	1.38496	0.0190532	tpm4a		tropomyosin 4a [Source:ZFIN;Acc:ZDB-GENE-040426-2185]	chr22:15724318-15748689
ENSDART00000065649	156.483	62.1874	452.544	2.71679	2.75706	223.738	2.73692	5.90426	0.0190578			growth arrest and DNA-damage-inducible, gamma [Source:HGNC Symbol;Acc:HGNC:4097]	chr21:19537917-19539614
ENSDART00000113392	148.336	120.594	71.8486	27.906	37.5867	113.593	32.7464	1.74721	0.0190821	ggcta	GO:0003839 (gamma-glutamylcyclotransferase activity)	gamma-glutamyl cyclotransferase a [Source:ZFIN;Acc:ZDB-GENE-081104-129]	chr19:2001905-2004513
ENSDART00000045991	5846.66	6644.89	1186.7	73.1712	21.7269	4559.42	47.449	6.49075	0.0190859	vrk1	GO:0004672 (protein kinase activity)	vaccinia related kinase 1 [Source:ZFIN;Acc:ZDB-GENE-040426-2709]	chr17:18604114-18627398
ENSDART00000132701	5466.99	5114.98	7853.82	14388.7	13379.7	6145.26	13884.2	-1.20146	0.0190887			havana:processed_transcript chromosome:Zv9:18:4246642:4250783:-1 gene:ENSDARG00000094934 gene_biotype:processed_transcript transcript_biotype:processed_transcript	chr18:4246642-4250783
ENSDART00000023038	4.15097	52.9267	30.1699	2111.66	3098.33	29.0825	2605	-7.08925	0.0190896	dacha	GO:0000166 (nucleotide binding)	dachshund a [Source:ZFIN;Acc:ZDB-GENE-020402-3]	chr21:33330273-33624083
ENSDART00000151451	419.884	329.156	153.196	41.8937	62.644	300.746	52.2689	2.43302	0.0191407			cdna:known chromosome:Zv9:19:14606877:14624680:-1 gene:ENSDARG00000015552 gene_biotype:protein_coding transcript_biotype:processed_transcript	chr19:14606877-14624680
ENSDART00000144948	7616.69	2246.28	331.31	2.66526	2.71584	3398.09	2.69055	9.37226	0.0191494	ponzr1	GO:0072078 (nephron tubule morphogenesis)	plac8 onzin related protein 1 [Source:ZFIN;Acc:ZDB-GENE-070727-1]	chr7:21501628-21527465
ENSDART00000032498	31298.7	35031.7	20251.7	2200.13	1265.19	28860.7	1732.66	4.07439	0.0191566	zgc:100919	GO:0016020 (membrane)	zgc:100919 [Source:ZFIN;Acc:ZDB-GENE-040718-248]	chr8:30574662-30582993
ENSDART00000113475	18.9904	22.0173	16.5233	46.9215	59.2931	19.177	53.1073	-1.46958	0.019166	si:dkey-91i10.2	GO:0005089 (Rho guanyl-nucleotide exchange factor activity)	si:dkey-91i10.2 [Source:ZFIN;Acc:ZDB-GENE-050208-441]	chr9:23974307-23997242
ENSDART00000001907	435.442	9109.76	4826.25	5.31868	4.15518	4790.49	4.73693	9.15242	0.0191878	slc16a3	GO:0015355 (secondary active monocarboxylate transmembrane transporter activity)	solute carrier family 16 (monocarboxylic acid transporters), member 3 [Source:ZFIN;Acc:ZDB-GENE-030131-5487]	chr12:34845164-34854562
ENSDART00000154831	540.808	154.056	232.279	3738.24	3656.24	309.048	3697.24	-3.78348	0.0192203			havana:processed_transcript chromosome:Zv9:15:16816381:16818189:-1 gene:ENSDARG00000097034 gene_biotype:processed_transcript transcript_biotype:lincRNA	chr15:16816381-16818189
ENSDART00000055260	3.91981	37.568	3.67527	939.069	340.081	15.0544	639.575	-6.11572	0.0192324	znfl1	GO:0046872 (metal ion binding)	zinc finger-like gene 1 [Source:ZFIN;Acc:ZDB-GENE-030828-6]	chr3:34737440-34742041
GENSCAN00000021792	5603.39	6952.29	9497.69	15633	18046.1	7351.12	16839.6	-1.22628	0.0192408			cdna:genscan chromosome:Zv9:17:46215932:46242874:-1 transcript_biotype:protein_coding	chr17:46215932-46242874
ENSDART00000120783	6680.15	7242.15	8922.2	13901.9	16817	7614.83	15359.4	-1.01663	0.0192529			ncrna:rRNA chromosome:Zv9:3:16310705:16310820:-1 gene:ENSDARG00000085383 gene_biotype:rRNA transcript_biotype:rRNA	chr3:16310705-16310820
ENSDART00000006513	10285.1	937.315	3673.05	29.6054	38.6185	4965.16	34.1119	6.60164	0.0192792	pdhb	GO:0004738 (pyruvate dehydrogenase activity)	pyruvate dehydrogenase (lipoamide) beta [Source:ZFIN;Acc:ZDB-GENE-040426-2173]	chr22:10311976-10322652
ENSDART00000065402	505.639	5199.22	315.526	8.09316	4.32964	2006.79	6.2114	7.31041	0.01928	zgc:77262	GO:0000166 (nucleotide binding)	zgc:77262 [Source:ZFIN;Acc:ZDB-GENE-040426-1811]	chr21:26592105-26595889
ENSDART00000153714	167.536	75.2719	689.224	11237.7	6940.79	310.677	9089.25	-5.42474	0.0192953			havana:lincRNA chromosome:Zv9:4:10826621:10836508:1 gene:ENSDARG00000096099 gene_biotype:lincRNA transcript_biotype:lincRNA	chr4:10826621-10836508
ENSDART00000155205	6.57216	10.724	10.9332	26.6447	28.3786	9.4098	27.5117	-1.58466	0.0193381			havana:lincRNA chromosome:Zv9:2:13842660:13843688:-1 gene:ENSDARG00000097054 gene_biotype:lincRNA transcript_biotype:lincRNA	chr2:13842660-13843688
ENSDART00000143371	4298.48	4404.04	6768.65	12606.6	10340.9	5157.06	11473.7	-1.17936	0.0193904			havana:processed_transcript chromosome:Zv9:23:16438215:16439456:1 gene:ENSDARG00000095240 gene_biotype:processed_transcript transcript_biotype:processed_transcript	chr23:16438215-16439456
ENSDART00000127923	1432.04	1256.26	441.607	138.353	98.7301	1043.3	118.542	2.98632	0.0194121	nktr	GO:0016853 (isomerase activity)	natural killer-tumor recognition sequence [Source:ZFIN;Acc:ZDB-GENE-030131-1725]	chr24:21252110-21267120
ENSDART00000125106	328.009	43.2931	275.169	3.15137	6.82613	215.49	4.98875	5.08575	0.0194368	pcyt1aa	GO:0003824 (catalytic activity)	phosphate cytidylyltransferase 1, choline, alpha a [Source:ZFIN;Acc:ZDB-GENE-050417-108]	chr2:9544319-9572728
ENSDART00000109157	10354	28639.9	1261.24	18.4267	30.1022	13418.4	24.2645	8.25699	0.0194451		GO:0005515 (protein binding)	F-box and leucine-rich repeat protein 6 [Source:HGNC Symbol;Acc:HGNC:13603]	chr19:22833110-22847334
ENSDART00000067179	3656.24	14630.4	479.39	2.73907	2.65379	6255.35	2.69643	10.0951	0.0195141	mrpl23	GO:0003735 (structural constituent of ribosome)	mitochondrial ribosomal protein L23 [Source:ZFIN;Acc:ZDB-GENE-040625-12]	chr25:24500808-24539288
GENSCAN00000021757	19484.6	35552	26955.2	10369.7	7670.26	27330.6	9019.96	1.57275	0.0195258			cdna:genscan chromosome:Zv9:3:1052835:1093107:-1 transcript_biotype:protein_coding	chr3:1052835-1093107
ENSDART00000130685	56.2906	17.9085	53.3662	3.65926	4.69596	42.5218	4.17761	3.18693	0.0195408	tiam2a	GO:0005515 (protein binding)	T-cell lymphoma invasion and metastasis 2a [Source:ZFIN;Acc:ZDB-GENE-030219-98]	chr17:49237769-49374443
ENSDART00000034263	16904.6	18879.6	12325.4	6199.06	7789.46	16036.5	6994.26	1.18377	0.0195574	sepn1		selenoprotein N, 1 [Source:ZFIN;Acc:ZDB-GENE-030327-7]	chr17:24515495-24523355
ENSDART00000132686	642.496	1437.49	774.072	3852.18	2906.41	951.354	3379.29	-1.90384	0.0195652	si:ch211-193e5.4	GO:0016773 (phosphotransferase activity, alcohol group as acceptor)	si:ch211-193e5.4 [Source:ZFIN;Acc:ZDB-GENE-091113-46]	chr24:5996277-5998307
ENSDART00000009695	644.721	1292.19	17670.2	10.565	4.99599	6535.72	7.7805	8.39806	0.0195694	kirrela	GO:0005515 (protein binding)	kin of IRRE like a [Source:ZFIN;Acc:ZDB-GENE-040426-2126]	chr7:20281571-20358028
ENSDART00000129159	81.7809	64.5951	54.4247	130.38	139.885	66.9336	135.133	-1.03293	0.0195844			ensembl:lincRNA chromosome:Zv9:7:71437636:71439239:1 gene:ENSDARG00000040740 gene_biotype:lincRNA transcript_biotype:lincRNA	chr7:71437636-71439239
ENSDART00000109318	524.403	13492	10705.3	3.15227	2.7159	8240.55	2.93408	10.4979	0.0196187	zc3h4	GO:0046872 (metal ion binding)	zinc finger CCCH-type containing 4 [Source:ZFIN;Acc:ZDB-GENE-100330-1]	chr15:23062877-23075166
ENSDART00000141186	7920.37	2339.86	345.494	3.05158	3.32965	3535.24	3.19062	9.18623	0.0196903	ponzr1	GO:0072078 (nephron tubule morphogenesis)	plac8 onzin related protein 1 [Source:ZFIN;Acc:ZDB-GENE-070727-1]	chr7:21501628-21527465
ENSDART00000100262	2405.75	1587.23	320.879	35.4516	23.4477	1437.95	29.4497	5.21391	0.0197264	zgc:110348	GO:0008831 (dTDP-4-dehydrorhamnose reductase activity)	tissue specific transplantation antigen P35B [Source:HGNC Symbol;Acc:HGNC:12390]	chr20:49109432-49145345
ENSDART00000139274	8093.36	2296.55	329.833	2.70212	2.69821	3573.25	2.70017	9.40474	0.0197832	ponzr1	GO:0072078 (nephron tubule morphogenesis)	plac8 onzin related protein 1 [Source:ZFIN;Acc:ZDB-GENE-070727-1]	chr7:21501628-21527465
ENSDART00000125993	203.58	156.903	122.427	58.6592	56.8672	160.97	57.7632	1.44775	0.0197985	prlrb	GO:0005515 (protein binding)	prolactin receptor b [Source:ZFIN;Acc:ZDB-GENE-070705-155]	chr5:69270216-69295286
ENSDART00000139509	21.167	52.2524	27.8018	160.347	113.478	33.7404	136.913	-2.10624	0.0198016	gna14a	GO:0001664 (G-protein coupled receptor binding)	guanine nucleotide binding protein (G protein), alpha 14a [Source:ZFIN;Acc:ZDB-GENE-081105-76]	chr8:54237080-54265109
ENSDART00000139685	7400.76	2200.13	298.446	2.96437	4.04652	3299.78	3.50545	8.93385	0.0198135	ponzr1	GO:0072078 (nephron tubule morphogenesis)	plac8 onzin related protein 1 [Source:ZFIN;Acc:ZDB-GENE-070727-1]	chr7:21501628-21527465
ENSDART00000138806	1349.09	1177.85	748.168	75.3371	41.8087	1091.7	58.5729	4.23846	0.0198361	barx2	GO:0043565 (sequence-specific DNA binding)	BarH-like homeobox 2 [Source:ZFIN;Acc:ZDB-GENE-081120-4]	chr18:45760635-45790172
GENSCAN00000026778	5886.48	8690.7	8416.82	18331.6	14759.4	7664.67	16545.5	-1.12319	0.0198565			cdna:genscan chromosome:Zv9:20:55116528:55201988:-1 transcript_biotype:protein_coding	chr20:55116528-55201988
ENSDART00000120961	3779.3	3714.37	5497.35	8754.13	9486.77	4330.34	9120.45	-1.09795	0.0199207			ncrna:rRNA chromosome:Zv9:10:13268855:13268973:-1 gene:ENSDARG00000085561 gene_biotype:rRNA transcript_biotype:rRNA	chr10:13268855-13268973
ENSDART00000129559	694.454	1611.19	5493.45	29.1876	33.6063	2599.7	31.397	5.87008	0.0199287	btbd3b	GO:0005515 (protein binding)	BTB (POZ) domain containing 3b [Source:ZFIN;Acc:ZDB-GENE-041210-282]	chr13:35262853-35272858
GENSCAN00000029108	9540.3	10985.7	7356.39	19171.7	20068.7	9294.13	19620.2	-1.09703	0.0199467			cdna:genscan scaffold:Zv9:Zv9_NA272:36934:37026:-1 transcript_biotype:protein_coding
ENSDART00000148306	10.1527	15.4429	7.91578	3.24281	2.97674	11.1705	3.10977	1.79031	0.0199522	map2		microtubule-associated protein 2 [Source:ZFIN;Acc:ZDB-GENE-041010-118]	chr9:39935697-40045681
GENSCAN00000011154	2722.67	15740.8	1983.18	132.42	83.981	6815.55	108.201	5.38172	0.0199674			cdna:genscan chromosome:Zv9:3:58345279:58429202:-1 transcript_biotype:protein_coding	chr3:58345279-58429202
ENSDART00000123667	47162.5	36702.3	30708.8	14232.2	18094.3	38191.2	16163.3	1.22837	0.0199798	pkma	GO:0004743 (pyruvate kinase activity)	pyruvate kinase, muscle, a [Source:ZFIN;Acc:ZDB-GENE-031201-4]	chr18:680253-729324
ENSDART00000151399	2.74782	2.85417	2.98631	4379.95	2726.36	2.86277	3553.15	-10.2382	0.020001		GO:0004713 (protein tyrosine kinase activity)	p21 protein (Cdc42/Rac)-activated kinase 7 [Source:HGNC Symbol;Acc:HGNC:15916]	chr20:55029269-55035659
ENSDART00000145107	3.02348	3.02688	5.16637	371.256	794.44	3.73891	582.848	-7.23063	0.0200183	agfg1b	GO:0008060 (ARF GTPase activator activity)	ArfGAP with FG repeats 1b [Source:ZFIN;Acc:ZDB-GENE-040426-1520]	chr2:16280904-16299874
ENSDART00000151013	13283.7	9931.68	1413.08	86.6558	197.087	8209.48	141.871	5.44998	0.0200823	ensaa		endosulfine alpha a [Source:ZFIN;Acc:ZDB-GENE-060503-181]	chr19:351956-354050
ENSDART00000154195	215.564	458.689	408.079	1876.75	1233.94	360.778	1555.35	-2.14952	0.0201303	si:dkey-77f5.6	GO:0046872 (metal ion binding)	zinc finger protein 557 [Source:HGNC Symbol;Acc:HGNC:28632]	chr15:997733-1002447
ENSDART00000123601	550.551	7970.83	24289.2	3.00777	4.91096	10936.9	3.95937	10.2687	0.0201845	dda1	GO:0003674 (molecular_function)	DET1 and DDB1 associated 1 [Source:ZFIN;Acc:ZDB-GENE-040426-2137]	chr11:5980431-5988210
ENSDART00000126172	6208.11	12832.4	436.634	3.51908	5.15954	6492.38	4.33931	9.58135	0.0202454			cdna:known chromosome:Zv9:1:4395678:4398739:-1 gene:ENSDARG00000006526 gene_biotype:protein_coding transcript_biotype:retained_intron	chr1:4395678-4398739
ENSDART00000066233	374.127	8517.46	4689.47	5.41303	8.91289	4527.02	7.16296	8.4701	0.0203142	slc16a3	GO:0015355 (secondary active monocarboxylate transmembrane transporter activity)	solute carrier family 16 (monocarboxylic acid transporters), member 3 [Source:ZFIN;Acc:ZDB-GENE-030131-5487]	chr12:34845164-34854562
ENSDART00000152559	249.999	3549.98	6025.82	3.83888	7.09945	3275.27	5.46916	8.38791	0.0203244	papola	GO:0004652 (polynucleotide adenylyltransferase activity)	poly(A) polymerase alpha [Source:ZFIN;Acc:ZDB-GENE-030131-3507]	chr20:4754496-4779853
ENSDART00000132266	704.737	5650.04	1613.19	30.6339	28.4085	2655.99	29.5212	5.97758	0.020331	minos1		mitochondrial inner membrane organizing system 1 [Source:ZFIN;Acc:ZDB-GENE-060825-325]	chr23:39889893-40047376
ENSDART00000127559	937.144	861.646	517.436	2228.88	2450.59	772.075	2339.74	-1.6444	0.0203721			ncrna:rRNA chromosome:Zv9:19:31049755:31049869:1 gene:ENSDARG00000089091 gene_biotype:rRNA transcript_biotype:rRNA	chr19:31049755-31049869
ENSDART00000138785	1396.67	328.66	1050.27	14.8902	39.1709	925.2	27.0305	5.02093	0.0204018			havana:processed_transcript chromosome:Zv9:9:19527441:19529654:-1 gene:ENSDARG00000092033 gene_biotype:processed_transcript transcript_biotype:retained_intron	chr9:19527441-19529654
ENSDART00000016677	8291.8	3065.74	273.408	2.9537	4.96365	3876.99	3.95868	8.96117	0.0204283	zgc:77929	GO:0003674 (molecular_function)	chromosome 6 open reading frame 120 [Source:HGNC Symbol;Acc:HGNC:21247]	chr11:11454025-11458402
ENSDART00000129617	1652.43	916.277	4579.25	78.8599	74.6267	2382.65	76.7433	4.63555	0.0204305	atp6ap1b	GO:0046933 (proton-transporting ATP synthase activity, rotational mechanism)	ATPase, H+ transporting, lysosomal accessory protein 1b [Source:ZFIN;Acc:ZDB-GENE-020423-2]	chr23:26366806-26381517
ENSDART00000102257	7.54115	9.1639	5.10153	16.3002	19.404	7.26886	17.8521	-1.33199	0.020457	alox5b.3	GO:0051213 (dioxygenase activity)	arachidonate 5-lipoxygenase b, tandem duplicate 3 [Source:ZFIN;Acc:ZDB-GENE-050522-330]	chr15:591147-603247
ENSDART00000132930	9.58043	12.0592	6.56873	2.69332	2.70585	9.40279	2.69959	1.75652	0.0204905			cdna:known chromosome:Zv9:9:43113600:43168220:1 gene:ENSDARG00000054378 gene_biotype:protein_coding transcript_biotype:processed_transcript	chr9:43113600-43168220
ENSDART00000153437	1137.32	730.637	1522.4	253.664	361.54	1130.12	307.602	1.83647	0.0205098	sash1a		SAM and SH3 domain containing 1a [Source:ZFIN;Acc:ZDB-GENE-030131-9960]	chr20:31454727-31769725
ENSDART00000146199	89.7871	159.738	74.4817	2072.18	4272.47	108.002	3172.32	-4.86329	0.0205289	tmem176l.3a		transmembrane protein 176l.3a [Source:ZFIN;Acc:ZDB-GENE-080829-13]	chr16:49679198-49706477
ENSDART00000124502	5564.36	5963.87	309.703	2.75142	2.6636	3945.98	2.70751	9.64948	0.0205549	lmnb1	GO:0005198 (structural molecule activity)	lamin B1 [Source:ZFIN;Acc:ZDB-GENE-020424-2]	chr10:16064820-16085482
ENSDART00000136933	6.0564	13.1117	2.79841	5273.1	23787.4	7.32216	14530.3	-10.8526	0.0206383			cdna:known chromosome:Zv9:10:18018354:18018969:-1 gene:ENSDARG00000069377 gene_biotype:protein_coding transcript_biotype:retained_intron	chr10:18018354-18018969
ENSDART00000080135	5200.12	3110.55	264.698	5.18674	8.77597	2858.46	6.98136	7.91097	0.020688	gfpt1	GO:0004360 (glutamine-fructose-6-phosphate transaminase (isomerizing) activity)	glutamine-fructose-6-phosphate transaminase 1 [Source:ZFIN;Acc:ZDB-GENE-070423-1]	chr8:52760108-52797249
ENSDART00000152349	1331.54	2890.14	1446.01	7449.28	5720.34	1889.23	6584.81	-1.88116	0.0207565			havana:processed_transcript chromosome:Zv9:15:38121670:38123472:1 gene:ENSDARG00000093338 gene_biotype:processed_transcript transcript_biotype:lincRNA	chr15:38121670-38123472
ENSDART00000128016	2.70483	2.687	62.8395	9960.61	9993.62	22.7438	9977.12	-10.3394	0.0207833	abi3bp	GO:0005515 (protein binding)	ABI family, member 3 (NESH) binding protein [Source:ZFIN;Acc:ZDB-GENE-030131-6041]	chr22:30094342-30130582
ENSDART00000113905	428.438	61.6125	78.1289	3.13875	7.09775	189.393	5.11825	4.75318	0.0207848		GO:0005525 (GTP binding)	elongation factor Tu GTP binding domain containing 1 [Source:HGNC Symbol;Acc:HGNC:25789]	chr7:12959881-13189936
ENSDART00000146480	11.2685	21.6142	24.6331	75.7469	61.7615	19.1719	68.7542	-1.91232	0.0207853	pou2f1b	GO:0043565 (sequence-specific DNA binding)	POU class 2 homeobox 1b [Source:ZFIN;Acc:ZDB-GENE-030131-2422]	chr9:35290637-35323921
ENSDART00000142027	6656.53	7266.15	342.127	2.6719	2.69452	4754.94	2.68321	9.89136	0.020789	chaf1a		chromatin assembly factor 1, subunit A (p150) [Source:ZFIN;Acc:ZDB-GENE-030131-5366]	chr22:22639669-22665315
ENSDART00000093415	82.0975	51.6571	44.2304	17.636	19.3939	59.3283	18.515	1.63005	0.020801	rbm45	GO:0000166 (nucleotide binding)	RNA binding motif protein 45 [Source:ZFIN;Acc:ZDB-GENE-070122-4]	chr9:1451711-1472538
ENSDART00000012932	73.5542	107.681	63.8028	30.7028	37.9897	81.6794	34.3463	1.22172	0.0208051	chrm5a	GO:0016907 (G-protein coupled acetylcholine receptor activity)	cholinergic receptor, muscarinic 5a [Source:ZFIN;Acc:ZDB-GENE-080723-32]	chr17:394009-395548
ENSDART00000154627	7.73908	9.14713	20.7689	48.2187	67.811	12.5517	58.0149	-2.33021	0.0208057	eogt	GO:0016757 (transferase activity, transferring glycosyl groups)	EGF domain-specific O-linked N-acetylglucosamine (GlcNAc) transferase [Source:ZFIN;Acc:ZDB-GENE-120813-8]	chr11:18226485-18254946
ENSDART00000059549	9204.83	6290.83	1302.18	170.363	112.45	5599.28	141.406	4.93184	0.0208111	nifk	GO:0000166 (nucleotide binding)	nucleolar protein interacting with the FHA domain of MKI67 [Source:ZFIN;Acc:ZDB-GENE-021231-4]	chr9:39210879-39214404
ENSDART00000149432	5322.61	1213.79	838.719	38.2814	98.3146	2458.37	68.298	4.83947	0.0209455	fam105ba		family with sequence similarity 105, member B, a [Source:ZFIN;Acc:ZDB-GENE-040426-2157]	chr24:10103801-10110664
ENSDART00000130241	14426.2	8544.8	10935.4	15.9527	6.90608	11302.1	11.4294	10.0395	0.0209702	nop10	GO:0030515 (snoRNA binding)	NOP10 ribonucleoprotein homolog (yeast) [Source:ZFIN;Acc:ZDB-GENE-041007-4]	chr7:1598483-1602167
ENSDART00000119689	410.087	207.447	247.005	721.934	947.054	288.18	834.494	-1.58325	0.0209708			ncrna:rRNA scaffold:Zv9:Zv9_scaffold3485:128331:128449:1 gene:ENSDARG00000084289 gene_biotype:rRNA transcript_biotype:rRNA
ENSDART00000074895	107.528	35.4352	6.29203	7781.44	6786.55	49.7518	7284	-7.97741	0.0209851	irx3a	GO:0043565 (sequence-specific DNA binding)	iroquois homeobox protein 3a [Source:ZFIN;Acc:ZDB-GENE-991119-5]	chr7:35811114-35814431
ENSDART00000126509	573.553	464.17	335.518	1771.17	1260.84	457.747	1516	-1.74115	0.0209949			ncrna:rRNA chromosome:Zv9:8:15569223:15569337:1 gene:ENSDARG00000086590 gene_biotype:rRNA transcript_biotype:rRNA	chr8:15569223-15569337
ENSDART00000147366	1489.49	9749.4	767.269	19.1473	28.9688	4002.05	24.058	6.56735	0.0210468			cdna:novel chromosome:Zv9:19:18109515:18110313:-1 gene:ENSDARG00000070899 gene_biotype:protein_coding transcript_biotype:retained_intron	chr19:18109515-18110313
ENSDART00000129854	1494.37	8296.26	10335.5	23.5911	88.9448	6708.71	56.2679	6.78213	0.0210556	tp53rk	GO:0016773 (phosphotransferase activity, alcohol group as acceptor)	TP53 regulating kinase [Source:ZFIN;Acc:ZDB-GENE-050522-123]	chr11:2436519-2441488
ENSDART00000149621	241.312	635.307	588.543	2053.06	2739.68	488.387	2396.37	-2.40265	0.0210586			cdna:pseudogene chromosome:Zv9:10:6342345:6344158:-1 gene:ENSDARG00000095785 gene_biotype:unprocessed_pseudogene transcript_biotype:unprocessed_pseudogene	chr10:6342345-6344158
ENSDART00000136384	6786.21	12518.1	9086.3	3498.62	2531.68	9463.54	3015.15	1.62397	0.0210717			cdna:putative chromosome:Zv9:17:22590748:22612736:1 gene:ENSDARG00000007918 gene_biotype:protein_coding transcript_biotype:processed_transcript	chr17:22590748-22612736
ENSDART00000128644	14.5506	20.9074	53.2877	3.82169	2.66601	29.5819	3.24385	2.98712	0.0210903			cdna:known chromosome:Zv9:15:22998151:23000501:-1 gene:ENSDARG00000040565 gene_biotype:protein_coding transcript_biotype:retained_intron	chr15:22998151-23000501
ENSDART00000006037	613.742	148.235	327.566	2118.93	3492.32	363.181	2805.63	-3.13325	0.0211053	colq		collagen-like tail subunit (single strand of homotrimer) of asymmetric acetylcholinesterase [Source:ZFIN;Acc:ZDB-GENE-110411-119]	chr16:22285802-22326723
ENSDART00000148658	2223.83	5541.64	2648.73	11823.4	16531.8	3471.4	14177.6	-2.12915	0.0211328			cdna:pseudogene chromosome:Zv9:10:6358190:6360004:-1 gene:ENSDARG00000074072 gene_biotype:unprocessed_pseudogene transcript_biotype:unprocessed_pseudogene	chr10:6358190-6360004
ENSDART00000029586	38954	24712.5	41738.2	103.991	45.5465	35134.9	74.7689	8.95905	0.021156	dnaja2	GO:0031072 (heat shock protein binding)	DnaJ (Hsp40) homolog, subfamily A, member 2 [Source:ZFIN;Acc:ZDB-GENE-040426-2884]	chr7:44633988-44646235
ENSDART00000130128	4.63143	2.71033	2.72057	8.7965	9.74527	3.35411	9.27089	-1.51287	0.0212126	rgs9a	GO:0005096 (GTPase activator activity)	regulator of G-protein signaling 9a [Source:ZFIN;Acc:ZDB-GENE-060929-92]	chr3:36365695-36388864
ENSDART00000060141	1278.86	7343.41	1185.55	47.4847	41.5875	3269.27	44.5361	5.651	0.0212657	zgc:112966		zgc:112966 [Source:ZFIN;Acc:ZDB-GENE-050320-137]	chr19:18108945-18110675
ENSDART00000133768	6.3523	30.5673	42.2212	622.929	1984.51	26.3803	1303.72	-5.78505	0.0213159	si:dkey-19p15.5	GO:0004713 (protein tyrosine kinase activity)	si:dkey-19p15.5 [Source:ZFIN;Acc:ZDB-GENE-081028-8]	chr13:8812377-8815567
ENSDART00000156258	27152.6	6591.28	9914.38	1120.29	889.841	14552.8	1005.06	3.59996	0.0213635	pfkpb	GO:0003872 (6-phosphofructokinase activity)	phosphofructokinase, platelet b [Source:ZFIN;Acc:ZDB-GENE-070912-634]	chr2:48233666-48286440
ENSDART00000135788	649.854	2698.44	8850.64	15.4231	16.7703	4066.31	16.0967	7.27705	0.0213987	mcmbp	GO:0003682 (chromatin binding)	minichromosome maintenance complex binding protein [Source:ZFIN;Acc:ZDB-GENE-030131-9676]	chr13:25758874-25772772
ENSDART00000106636	27737.2	31186.6	18595.5	8788.78	8916.23	25839.8	8852.51	1.51178	0.0214023	srsf3b	GO:0000166 (nucleotide binding)	serine/arginine-rich splicing factor 3b [Source:ZFIN;Acc:ZDB-GENE-071005-2]	chr22:588434-598136
GENSCAN00000035198	542.527	793.585	527.4	1320.33	1186.57	621.171	1253.45	-1.03678	0.0214246			cdna:genscan scaffold:Zv9:Zv9_scaffold3506:114607:128859:-1 transcript_biotype:protein_coding
ENSDART00000056280	27620.7	6997.51	9334.64	1191.1	934.941	14650.9	1063.02	3.52808	0.021484	pfkpb	GO:0003872 (6-phosphofructokinase activity)	phosphofructokinase, platelet b [Source:ZFIN;Acc:ZDB-GENE-070912-634]	chr2:48233666-48286440
ENSDART00000120784	28.0817	38.2779	30.5069	798.514	1270.63	32.2888	1034.57	-4.9759	0.0214974			ncrna:rRNA chromosome:Zv9:23:9725102:9725224:1 gene:ENSDARG00000085384 gene_biotype:rRNA transcript_biotype:rRNA	chr23:9725102-9725224
ENSDART00000124815	3293.65	2333.03	3897.25	7590.41	6256.93	3174.65	6923.67	-1.15003	0.0215276			ncrna:rRNA chromosome:Zv9:23:17672032:17672146:1 gene:ENSDARG00000088698 gene_biotype:rRNA transcript_biotype:rRNA	chr23:17672032-17672146
ENSDART00000087729	2.64736	2.70378	2.67478	2147.26	1383.38	2.67531	1765.32	-9.33148	0.0215312	zgc:153957	GO:0005515 (protein binding)	lysine (K)-specific demethylase 4C [Source:HGNC Symbol;Acc:HGNC:17071]	chr1:20772168-20806880
ENSDART00000146779	5433.2	195.777	2098.09	2.77425	4.62564	2575.69	3.69994	8.51096	0.0215467	slc38a2	GO:0015293 (symporter activity)	solute carrier family 38, member 2 [Source:ZFIN;Acc:ZDB-GENE-030131-9659]	chr4:1459089-1476952
ENSDART00000114629	92.862	70.6209	43.6829	190.612	234.938	69.0553	212.775	-1.68264	0.021572	ep300a	GO:0005515 (protein binding)	E1A binding protein p300 a [Source:ZFIN;Acc:ZDB-GENE-080403-16]	chr12:19953030-20057773
ENSDART00000145921	5818.33	5678.64	8985.1	15945.7	14144.6	6827.36	15045.1	-1.17074	0.0216173			havana:processed_transcript chromosome:Zv9:13:13527992:13529155:1 gene:ENSDARG00000094807 gene_biotype:processed_transcript transcript_biotype:processed_transcript	chr13:13527992-13529155
ENSDART00000078634	42254.9	27318	29011.7	13274.6	16505.5	32861.5	14890.1	1.12273	0.0216517	eif5a2	GO:0043022 (ribosome binding)	eukaryotic translation initiation factor 5A2 [Source:ZFIN;Acc:ZDB-GENE-040426-2405]	chr2:25987363-25993507
ENSDART00000067433	20718.7	29112.9	20113.6	10772.3	10479.6	23315.1	10626	1.1128	0.0216556	ube2nb	GO:0043130 (ubiquitin binding)	ubiquitin-conjugating enzyme E2Nb [Source:ZFIN;Acc:ZDB-GENE-040426-1291]	chr4:1670194-1678947
ENSDART00000109535	1219.62	6126.65	6844.28	91.6256	102.576	4730.18	97.101	5.25881	0.0216839	gmps	GO:0003922 (GMP synthase (glutamine-hydrolyzing) activity)	guanine monphosphate synthetase [Source:ZFIN;Acc:ZDB-GENE-040426-1503]	chr18:32408894-32442476
ENSDART00000124393	1316.9	1181.31	1838.94	3627.15	2860.73	1445.72	3243.94	-1.18214	0.021712	si:dkey-16p6.1	GO:0005515 (protein binding)	si:dkey-16p6.1 [Source:ZFIN;Acc:ZDB-GENE-081103-43]	chr4:39533141-39546272
ENSDART00000145685	26401.8	30735.2	17679.2	8641.19	9350.19	24938.7	8995.69	1.43468	0.0217287	srsf3b	GO:0000166 (nucleotide binding)	serine/arginine-rich splicing factor 3b [Source:ZFIN;Acc:ZDB-GENE-071005-2]	chr22:588434-598136
ENSDART00000148340	3376.68	7060.76	3430.57	1376.49	965.197	4622.67	1170.84	1.91302	0.021761			havana:processed_transcript chromosome:Zv9:9:37847028:37850143:1 gene:ENSDARG00000093486 gene_biotype:processed_transcript transcript_biotype:processed_transcript	chr9:37847028-37850143
ENSDART00000122269	2137.13	157.346	1283.33	4.9694	7.16648	1192.6	6.06794	6.98448	0.0217632			Uncharacterized protein [Source:UniProtKB/TrEMBL;Acc:H9GY81]	chrZv9_NA466:277-23564
ENSDART00000098734	4651.55	718.501	6171.19	47.9455	74.5659	3847.08	61.2557	5.51934	0.021765	cacybp		calcyclin binding protein [Source:ZFIN;Acc:ZDB-GENE-040426-2579]	chr2:35316287-35322203
ENSDART00000129232	11.4131	38.6822	30.4171	10769.5	3241.86	26.8375	7005.69	-7.95763	0.0218105	sv2bb	GO:0022857 (transmembrane transporter activity)	synaptic vesicle glycoprotein 2 bb [Source:ZFIN;Acc:ZDB-GENE-030131-2789]	chr25:11109520-11129393
ENSDART00000041265	646.897	11634	7570.68	11.9134	16.6068	6617.18	14.2601	8.09578	0.0218533	rad23aa	GO:0005515 (protein binding)	RAD23 homolog Aa (S. cerevisiae) [Source:ZFIN;Acc:ZDB-GENE-040808-59]	chr1:52605851-52623351
ENSDART00000137545	89.6233	52.6397	511.061	6869.99	3290.49	217.775	5080.24	-5.14801	0.0218882			havana:processed_transcript chromosome:Zv9:5:42818040:42871448:1 gene:ENSDARG00000093616 gene_biotype:processed_transcript transcript_biotype:processed_transcript	chr5:42818040-42871448
ENSDART00000127385	18207	21051.2	3639.77	30.471	123.798	14299.3	77.1347	7.50721	0.0218922	fosl1b	GO:0043565 (sequence-specific DNA binding)	FOS-like antigen 1b [Source:ZFIN;Acc:ZDB-GENE-091204-259]	chr21:24820273-24820593
ENSDART00000037036	13517	19612.9	13548.8	8333.15	6817.09	15559.6	7575.12	1.02283	0.0219333	cnppd1	GO:0019901 (protein kinase binding)	cyclin Pas1/PHO80 domain containing 1 [Source:ZFIN;Acc:ZDB-GENE-030131-6808]	chr1:5025590-5033477
ENSDART00000144034	5191.39	4908.74	7994	14488.1	12877.9	6031.38	13683	-1.21501	0.0219424			havana:processed_transcript chromosome:Zv9:8:7461871:7463022:-1 gene:ENSDARG00000093762 gene_biotype:processed_transcript transcript_biotype:processed_transcript	chr8:7461871-7463022
ENSDART00000130243	12.1793	8.15944	10.9692	3.48306	4.56158	10.436	4.02232	1.36846	0.0220325	ugt1ab	GO:0016757 (transferase activity, transferring glycosyl groups)	UDP glucuronosyltransferase 1 family, polypeptide A7 [Source:ZFIN;Acc:ZDB-GENE-080227-6]	chr9:10194767-10228491
ENSDART00000149539	57317	55173	36988.2	8910.87	13070.2	49826	10990.5	2.18004	0.0220656	pdia3	GO:0016853 (isomerase activity)	protein disulfide isomerase family A, member 3 [Source:ZFIN;Acc:ZDB-GENE-031002-9]	chr25:31332644-31347155
ENSDART00000156193	12.1319	9.62173	11.8001	32.379	25.9353	11.1846	29.1571	-1.38099	0.0220952	dicp3.1	GO:0005515 (protein binding)	diverse immunoglobulin domain-containing protein 3.1 [Source:ZFIN;Acc:ZDB-GENE-120306-18]	chr16:24066596-24077743
ENSDART00000141371	3062.48	2072.66	1918.51	5263.11	4502.34	2351.22	4882.73	-1.08124	0.0221003	si:dkey-78l4.6	GO:0004252 (serine-type endopeptidase activity)		chr22:19772151-19773468
ENSDART00000085087	1068.69	1051.38	205.987	41.4451	26.2735	775.353	33.8593	4.2177	0.0221062	ddx28	GO:0016787 (hydrolase activity)	DEAD (Asp-Glu-Ala-Asp) box polypeptide 28 [Source:ZFIN;Acc:ZDB-GENE-061013-64]	chr7:36418435-36420334
ENSDART00000127326	1249	566.762	460.424	5236.69	3143.59	758.727	4190.14	-2.55966	0.0221436	dhrs7ca	GO:0016491 (oxidoreductase activity)	dehydrogenase/reductase (SDR family) member 7Ca [Source:ZFIN;Acc:ZDB-GENE-050320-114]	chr3:59497988-59514355
ENSDART00000060255	560.154	1680.9	1728.71	105.285	116.114	1323.25	110.7	3.41128	0.022203	blmh	GO:0016787 (hydrolase activity)	bleomycin hydrolase [Source:ZFIN;Acc:ZDB-GENE-030131-8485]	chr15:27983464-28134396
ENSDART00000061912	1209.44	6168.3	248.004	2.69681	3.09333	2541.91	2.89507	8.73146	0.0222063	specc1lb	GO:0005515 (protein binding)	sperm antigen with calponin homology and coiled-coil domains 1-like b [Source:ZFIN;Acc:ZDB-GENE-090423-1]	chr21:11435024-11489417
ENSDART00000111644	106.34	6.05228	72.9061	3669.52	7016.17	61.7662	5342.84	-7.13626	0.0222496		GO:0003676 (nucleic acid binding)	Uncharacterized protein [Source:UniProtKB/TrEMBL;Acc:F1QIZ4]	chr4:28932566-28935614
ENSDART00000078640	48.2749	75.0316	41.3948	176.071	262.745	54.9004	219.408	-2.01743	0.022338			Uncharacterized protein [Source:UniProtKB/TrEMBL;Acc:E7F8J0]	chr6:24074034-24075412
ENSDART00000066722	3484.91	67549.7	12757.2	86.613	147.869	27930.6	117.241	6.99419	0.0224452	pabpn1	GO:0000166 (nucleotide binding)	poly(A) binding protein, nuclear 1 [Source:ZFIN;Acc:ZDB-GENE-040426-2401]	chr24:14463461-14481677
ENSDART00000131711	57833.1	34664.9	28205.5	3601.15	6270.81	40234.5	4935.98	3.01382	0.0224649	hnrnpa1b		heterogeneous nuclear ribonucleoprotein A1b [Source:ZFIN;Acc:ZDB-GENE-030912-14]	chr23:36358083-36361962
ENSDART00000023653	87.9405	109.79	149.769	52.6241	40.6373	115.833	46.6307	1.29003	0.0224883	fes	GO:0005515 (protein binding)	feline sarcoma oncogene [Source:ZFIN;Acc:ZDB-GENE-100812-10]	chr7:15088691-15143627
ENSDART00000120462	1268.42	865.701	1421.14	3050.73	2927.23	1185.09	2988.98	-1.36534	0.0224886			ncrna:rRNA chromosome:Zv9:25:26250360:26250493:1 gene:ENSDARG00000085062 gene_biotype:rRNA transcript_biotype:rRNA	chr25:26250360-26250493
ENSDART00000101091	33113	25515.3	23726.5	672.811	1102.81	27451.6	887.81	4.97895	0.0225037	zgc:65772	GO:0000166 (nucleotide binding)	serine/arginine-rich splicing factor 10 [Source:HGNC Symbol;Acc:HGNC:16713]	chr17:53940035-53946422
ENSDART00000000887	123.506	2020.5	2109.03	3.11806	11.037	1417.68	7.07754	7.10464	0.0225161	rassf6	GO:0005575 (cellular_component)	Ras association (RalGDS/AF-6) domain family 6 [Source:ZFIN;Acc:ZDB-GENE-030616-513]	chr10:13173370-13199802
ENSDART00000110636	90.5006	94.2666	58.3278	216.439	168.146	81.0316	192.292	-1.26748	0.0225203			ubiquitin-conjugating enzyme E2O [Source:HGNC Symbol;Acc:HGNC:29554]	chrZv9_NA224:1559-4272
ENSDART00000103797	9.10008	10.8532	3.96179	51.4902	55.1394	7.97168	53.3148	-2.86493	0.0225256	hoxa11a	GO:0043565 (sequence-specific DNA binding)	homeo box A11a [Source:ZFIN;Acc:ZDB-GENE-000823-8]	chr19:19202959-19204668
ENSDART00000063923	21920.4	7528.69	584.385	4.835	4.04804	10011.1	4.44152	10.0176	0.0225301	znf259	GO:0008270 (zinc ion binding)	zinc finger protein 259 [Source:ZFIN;Acc:ZDB-GENE-040426-2110]	chr10:30727929-30739701
ENSDART00000120174	2549.93	1285.21	2015.45	5144.78	7260.16	1950.2	6202.47	-1.7037	0.0226033			ncrna:rRNA chromosome:Zv9:24:21881064:21881180:1 gene:ENSDARG00000084774 gene_biotype:rRNA transcript_biotype:rRNA	chr24:21881064-21881180
GENSCAN00000019066	2737.44	2728.29	3024.9	6045.18	5312.09	2830.21	5678.63	-1.00329	0.0226166			cdna:genscan chromosome:Zv9:4:48008816:48016806:1 transcript_biotype:protein_coding	chr4:48008816-48016806
ENSDART00000153151	30198.9	29421.8	40255.2	42.6924	84.5887	33292	63.6406	9.09875	0.0226501	cx43		connexin 43 [Source:ZFIN;Acc:ZDB-GENE-991105-4]	chr20:40746894-40752261
ENSDART00000097580	2.8925	2.95853	69.3858	4320.7	2199.09	25.079	3259.89	-8.51861	0.0226768	pigl	GO:0003674 (molecular_function)	phosphatidylinositol glycan anchor biosynthesis, class L [Source:ZFIN;Acc:ZDB-GENE-050506-60]	chr5:43615471-43672652
ENSDART00000151431	2.86526	2.94746	8.42677	24.9143	46.1533	4.7465	35.5338	-3.03259	0.0227316			cdna:known chromosome:Zv9:19:35253278:35331263:-1 gene:ENSDARG00000019258 gene_biotype:protein_coding transcript_biotype:processed_transcript	chr19:35253278-35331263
ENSDART00000133406	6.69137	55.2317	11.4811	1013.97	975.018	24.4681	994.494	-5.94057	0.0227429	or132-4	GO:0004930 (G-protein coupled receptor activity)	odorant receptor, family H, subfamily 132, member 4 [Source:ZFIN;Acc:ZDB-GENE-070806-50]	chr21:24631955-24632923
ENSDART00000143654	45552.3	15554.1	11180.2	1312.9	1475.82	24095.5	1394.36	3.84005	0.0227452			cdna:known chromosome:Zv9:5:43134785:43139129:1 gene:ENSDARG00000020008 gene_biotype:protein_coding transcript_biotype:processed_transcript	chr5:43134785-43139129
ENSDART00000004751	13650.2	3653.18	1916.42	174.915	306.974	6406.61	240.944	4.30235	0.0227612	pbx2	GO:0043565 (sequence-specific DNA binding)	pre-B-cell leukemia transcription factor 2 [Source:ZFIN;Acc:ZDB-GENE-000405-5]	chr16:51950122-51977260
ENSDART00000022999	36971.7	17795.2	18162.5	7696.71	5791.25	24309.8	6743.98	1.77583	0.0228002	ube2i2	GO:0016881 (acid-amino acid ligase activity)	ubiquitin-conjugating enzyme E2I2 [Source:ZFIN;Acc:ZDB-GENE-010607-1]	chr24:38770295-38784817
ENSDART00000036531	6792.63	2026.35	342.467	5.83909	6.17369	3053.81	6.00639	8.12547	0.0228205	gnai1	GO:0031821 (G-protein coupled serotonin receptor binding)	guanine nucleotide binding protein (G protein), alpha inhibiting activity polypeptide 1 [Source:ZFIN;Acc:ZDB-GENE-040426-1310]	chr4:21616132-21649753
ENSDART00000145682	217.605	90.181	16.8772	5368.81	3137.17	108.221	4252.99	-5.89037	0.0228534			cdna:pseudogene chromosome:Zv9:8:14609745:14611467:-1 gene:ENSDARG00000094773 gene_biotype:unprocessed_pseudogene transcript_biotype:unprocessed_pseudogene	chr8:14609745-14611467
ENSDART00000153605	12.3663	2.71735	76.8352	1085.39	3380.36	30.6396	2232.88	-7.1254	0.0228731	si:ch211-280a23.2	GO:0004713 (protein tyrosine kinase activity)	si:ch211-280a23.2 [Source:ZFIN;Acc:ZDB-GENE-131119-11]	chr25:13531264-13536168
ENSDART00000131663	1164.45	2574.71	141.996	2.71152	2.82914	1293.72	2.77033	8.08538	0.0229241	gnpnat1		glucosamine-phosphate N-acetyltransferase 1 [Source:ZFIN;Acc:ZDB-GENE-050522-450]	chr17:15054735-15061179
ENSDART00000148257	39.2709	16.773	25.3242	82.8301	102.71	27.1227	92.7703	-1.85196	0.0229388	casz1	GO:0046872 (metal ion binding)	castor zinc finger 1 [Source:ZFIN;Acc:ZDB-GENE-060130-108]	chr23:29201901-29246807
GENSCAN00000005007	34635.7	18863.1	28744.1	62.1935	24.9865	27414.3	43.59	9.39719	0.0229488			cdna:genscan chromosome:Zv9:6:8053660:8065206:1 transcript_biotype:protein_coding	chr6:8053660-8065206
ENSDART00000156117	2070.92	4493.21	798.307	96.2958	125.829	2454.15	111.062	4.14777	0.0230181			havana:lincRNA chromosome:Zv9:3:30173197:30174321:-1 gene:ENSDARG00000097575 gene_biotype:lincRNA transcript_biotype:lincRNA	chr3:30173197-30174321
ENSDART00000139914	1811.78	1039.27	1551.44	4094.02	3145.77	1467.5	3619.89	-1.32793	0.0230497	si:dkey-193i10.1	GO:0005515 (protein binding)	si:dkey-193i10.1 [Source:ZFIN;Acc:ZDB-GENE-070705-341]	chr4:51696337-51709342
ENSDART00000140650	5.18161	3.25484	71.1581	1019.74	2397.18	26.5315	1708.46	-7.20091	0.0230874	ankrd6b	GO:0005515 (protein binding)	ankyrin repeat domain 6b [Source:ZFIN;Acc:ZDB-GENE-030916-4]	chr20:1226689-1262912
ENSDART00000131523	9.5019	9.59439	22.4886	54.2199	89.8176	13.8616	72.0188	-2.45766	0.0231033	pax6a	GO:0043565 (sequence-specific DNA binding)	paired box gene 6a [Source:ZFIN;Acc:ZDB-GENE-990415-200]	chr25:15289718-15409410
ENSDART00000145013	481.775	5156.01	296.075	3.88329	5.61942	1977.95	4.75136	7.59418	0.0231675	zgc:77262	GO:0000166 (nucleotide binding)	zgc:77262 [Source:ZFIN;Acc:ZDB-GENE-040426-1811]	chr21:26592105-26595889
ENSDART00000137991	62.9628	63.0206	30.8726	248.483	428.018	52.2854	338.25	-2.71512	0.0231935			cdna:known chromosome:Zv9:6:21709031:21712001:1 gene:ENSDARG00000014727 gene_biotype:protein_coding transcript_biotype:retained_intron	chr6:21709031-21712001
ENSDART00000065996	10254.9	15403.4	3353.7	975.657	627.768	9670.69	801.713	3.37002	0.0232107	tmem183a	GO:0005515 (protein binding)	transmembrane protein 183A [Source:ZFIN;Acc:ZDB-GENE-050327-5]	chr11:23196844-23205273
ENSDART00000102672	348.361	392.577	60.1156	6872.2	8708.71	267.018	7790.46	-5.26042	0.0232223	nck2a	GO:0005515 (protein binding)	NCK adaptor protein 2a [Source:ZFIN;Acc:ZDB-GENE-040426-686]	chr9:6435963-6543070
ENSDART00000141343	4368.13	1465.09	2659.29	139.44	290.11	2830.84	214.775	3.67682	0.023233			havana:lincRNA chromosome:Zv9:1:6993890:6996637:1 gene:ENSDARG00000095344 gene_biotype:lincRNA transcript_biotype:lincRNA	chr1:6993890-6996637
ENSDART00000134800	3573.65	6934.46	4280.44	1460.81	1636.42	4929.51	1548.61	1.61433	0.0232392			havana:processed_transcript chromosome:Zv9:10:9626561:9628785:-1 gene:ENSDARG00000092826 gene_biotype:processed_transcript transcript_biotype:retained_intron	chr10:9626561-9628785
GENSCAN00000015401	11808.1	11438.1	16303.1	26130	26802	13183.1	26466	-1.02444	0.0233282			cdna:genscan scaffold:Zv9:Zv9_scaffold3555:6645:42741:1 transcript_biotype:protein_coding
ENSDART00000015670	362.133	862.817	5706.17	18.2448	10.6628	2310.37	14.4538	6.4419	0.023361	med7	GO:0001104 (RNA polymerase II transcription cofactor activity)	mediator complex subunit 7 [Source:ZFIN;Acc:ZDB-GENE-030131-4823]	chr14:35150897-35152585
ENSDART00000131094	4195.48	7044.77	4306.48	105.957	51.7746	5182.24	78.8656	6.08567	0.02339	rsu1	GO:0005515 (protein binding)	Ras suppressor protein 1 [Source:ZFIN;Acc:ZDB-GENE-030616-518]	chr24:33153256-33231007
ENSDART00000125739	655.5	5566.2	1482.13	31.7933	32.8152	2567.94	32.3043	5.76399	0.0234213	minos1	GO:0003674 (molecular_function)	mitochondrial inner membrane organizing system 1 [Source:ZFIN;Acc:ZDB-GENE-060825-325]	chr23:39889893-40047376
ENSDART00000154248	18297.6	8927.38	20461.9	4675.26	3345.83	15895.6	4010.54	1.91853	0.023442	si:dkey-77f5.10	GO:0016021 (integral component of membrane)	si:dkey-77f5.10 [Source:ZFIN;Acc:ZDB-GENE-131121-133]	chr15:933554-940667
ENSDART00000078982	14.8143	19.3752	182.837	2714.2	12368.3	72.342	7541.27	-7.27385	0.0234906	vat1	GO:0016747 (transferase activity, transferring acyl groups other than amino-acyl groups)	vesicle amine transport protein 1 homolog (T californica) [Source:ZFIN;Acc:ZDB-GENE-030616-178]	chr3:19801557-19858999
ENSDART00000155062	17.3873	14.1601	16.6399	65.825	85.746	16.0624	75.7855	-2.23118	0.0235234	si:rp71-86g14.3	GO:0015078 (hydrogen ion transmembrane transporter activity)	ATPase, H+ transporting, lysosomal 42kDa, V1 subunit C2 [Source:HGNC Symbol;Acc:HGNC:18264]	chr17:52181639-52205532
ENSDART00000152529	23.5833	15.4218	19.8311	55.899	42.5445	19.612	49.2218	-1.33573	0.0236349	lrrc18b	GO:0005515 (protein binding)	leucine rich repeat containing 18b [Source:ZFIN;Acc:ZDB-GENE-110315-1]	chr12:2693006-2695341
ENSDART00000153736	528.288	1325.25	710.159	3659.01	2651.47	854.565	3155.24	-1.97516	0.0236464	si:ch211-193e5.3	GO:0016773 (phosphotransferase activity, alcohol group as acceptor)	si:ch211-193e5.3 [Source:ZFIN;Acc:ZDB-GENE-091116-7]	chr24:5993051-5995352
ENSDART00000109230	139.311	235.737	120.065	826.438	1398.28	165.038	1112.36	-2.76648	0.0236524	ulk3	GO:0004713 (protein tyrosine kinase activity)	unc-51-like kinase 3 (C. elegans) [Source:ZFIN;Acc:ZDB-GENE-070410-33]	chr18:5016514-5036148
ENSDART00000142999	1835.49	3816.78	873.792	111.824	229.802	2175.36	170.813	3.51241	0.0236771	lpgat1	GO:0016746 (transferase activity, transferring acyl groups)	lysophosphatidylglycerol acyltransferase 1 [Source:ZFIN;Acc:ZDB-GENE-030131-2906]	chr20:13696553-13789114
ENSDART00000139478	5487.94	5287.03	8707.17	15611.3	13708.8	6494.05	14660.1	-1.21047	0.0237003			havana:processed_transcript chromosome:Zv9:14:49797993:49801740:1 gene:ENSDARG00000095508 gene_biotype:processed_transcript transcript_biotype:processed_transcript	chr14:49797993-49801740
ENSDART00000112937	424.457	22418.9	4361.9	2.8223	4.29679	9068.41	3.55955	9.95748	0.0237111	cnp	GO:0004113 (2',3'-cyclic-nucleotide 3'-phosphodiesterase activity)	2',3'-cyclic nucleotide 3' phosphodiesterase [Source:ZFIN;Acc:ZDB-GENE-030521-29]	chr3:17662020-17673215
GENSCAN00000014778	4288.16	1109.76	320.631	11.7404	15.9198	1906.19	13.8301	6.3959	0.0237152			cdna:genscan chromosome:Zv9:7:31959825:31967377:1 transcript_biotype:protein_coding	chr7:31959825-31967377
ENSDART00000143069	87.4397	466.166	61.8533	11837.5	3670.41	205.153	7753.96	-5.59784	0.0237197	si:dkey-222b8.5	GO:0004674 (protein serine/threonine kinase activity)	si:dkey-179a6.3 [Source:ZFIN;Acc:ZDB-GENE-071003-2]	chr19:24110325-24114191
ENSDART00000137125	556.034	277.234	1231.13	4575.88	9368.31	688.134	6972.09	-3.51012	0.0237346	spop	GO:0005515 (protein binding)	speckle-type POZ protein [Source:ZFIN;Acc:ZDB-GENE-040426-1378]	chr3:20547488-20779739
ENSDART00000130034	4163.52	2701.55	4954.54	11658.3	12030.6	3939.87	11844.4	-1.63251	0.0237497			ensembl:processed_transcript chromosome:Zv9:16:28622489:28629573:-1 gene:ENSDARG00000088497 gene_biotype:processed_transcript transcript_biotype:processed_transcript	chr16:28622489-28629573
ENSDART00000080385	123.13	61.0981	505.137	2828.9	4976.68	229.788	3902.79	-4.58762	0.0237737		GO:0005515 (protein binding)	solute carrier family 9, subfamily A (NHE3, cation proton antiporter 3), member 3 regulator 2 [Source:HGNC Symbol;Acc:HGNC:11076]	chr1:54706627-54728998
ENSDART00000114349	10.8722	15.1158	10.5569	2.99232	4.12028	12.1816	3.5563	1.77489	0.023789	nrg1	GO:0005515 (protein binding)	neuregulin 1 [Source:ZFIN;Acc:ZDB-GENE-050302-113]	chr10:5882254-6070492
ENSDART00000145897	4374.75	3603.38	6383.75	14236.5	10648.8	4787.3	12442.7	-1.40442	0.02381			havana:processed_transcript chromosome:Zv9:2:26204170:26205313:-1 gene:ENSDARG00000094683 gene_biotype:processed_transcript transcript_biotype:retained_intron	chr2:26204170-26205313
ENSDART00000142832	20304.8	28652	17153.9	4885.97	3172.21	22036.9	4029.09	2.45119	0.0238178			havana:processed_transcript chromosome:Zv9:14:18736578:18738102:1 gene:ENSDARG00000093678 gene_biotype:processed_transcript transcript_biotype:processed_transcript	chr14:18736578-18738102
ENSDART00000147869	24.512	31.261	20.7898	9.35391	12.0894	25.5209	10.7217	1.24255	0.0238263	rimbp2		RIMS binding protein 2 [Source:ZFIN;Acc:ZDB-GENE-040724-96]	chr8:46121698-46125794
ENSDART00000050201	246.032	3838.53	6612.55	3.08554	2.777	3565.71	2.93127	9.29715	0.0238328	papola	GO:0004652 (polynucleotide adenylyltransferase activity)	poly(A) polymerase alpha [Source:ZFIN;Acc:ZDB-GENE-030131-3507]	chr20:4754496-4779853
ENSDART00000122474	374.078	71.2424	235.074	8.45193	2.87923	226.798	5.66558	5.22379	0.0238492	ptk2.1	GO:0016740 (transferase activity)	protein tyrosine kinase 2a [Source:ZFIN;Acc:ZDB-GENE-020114-1]	chr16:33040836-33173290
ENSDART00000131007	8.28933	11.8329	21.5091	3.49106	2.72217	13.8771	3.10661	2.05675	0.0238603	eci2	GO:0000062 (fatty-acyl-CoA binding)	enoyl-CoA delta isomerase 2 [Source:ZFIN;Acc:ZDB-GENE-040718-392]	chr24:3105987-3144339
ENSDART00000156186	59.3282	81.8748	137.44	525.328	327.692	92.8811	426.51	-2.24708	0.0239073	si:dkey-86k10.6	GO:0007160 (cell-matrix adhesion)	si:dkey-86k10.6 [Source:ZFIN;Acc:ZDB-GENE-131121-360]	chr12:46308684-46311168
ENSDART00000148379	216.439	252.825	132.31	6374.84	13433.5	200.525	9904.17	-5.58	0.0239207	ctnnb1	GO:0005488 (binding)	catenin (cadherin-associated protein), beta 1 [Source:ZFIN;Acc:ZDB-GENE-980526-362]	chr16:7435502-7458987
ENSDART00000152945	142.979	29.2709	27.6485	903.697	2565.83	66.633	1734.76	-4.96572	0.0239428	si:ch211-277e21.2	GO:0005515 (protein binding)	ankyrin-repeat and fibronectin type III domain containing 1 [Source:HGNC Symbol;Acc:HGNC:26766]	chr12:33980496-34062088
ENSDART00000081675	121.817	93.7984	65.7399	2459.94	4917.69	93.7851	3688.81	-5.25783	0.0239747	ctnnb2	GO:0005488 (binding)	catenin, beta 2 [Source:ZFIN;Acc:ZDB-GENE-040426-2575]	chr19:49721962-49734841
ENSDART00000002078	4.62525	3.85299	3.48551	15.2541	20.651	3.98792	17.9525	-2.164	0.0239863	neurod2	GO:0046983 (protein dimerization activity)	neurogenic differentiation 2 [Source:ZFIN;Acc:ZDB-GENE-010608-3]	chr12:15799599-15802466
ENSDART00000115329	2374.11	4721.3	934.018	128.275	258.03	2676.48	193.152	3.58791	0.0240013	lpgat1	GO:0016746 (transferase activity, transferring acyl groups)	lysophosphatidylglycerol acyltransferase 1 [Source:ZFIN;Acc:ZDB-GENE-030131-2906]	chr20:13696553-13789114
ENSDART00000144737	46289.2	52171.9	29052	16265.4	14597	42504.4	15431.2	1.42046	0.0240023			cdna:known chromosome:Zv9:22:588467:591778:-1 gene:ENSDARG00000059360 gene_biotype:protein_coding transcript_biotype:retained_intron	chr22:588467-591778
ENSDART00000057174	198.551	7555.38	3442.97	2.78823	5.44426	3732.3	4.11625	8.79332	0.0240154	arpc5a	GO:0005856 (cytoskeleton)	actin related protein 2/3 complex, subunit 5A [Source:ZFIN;Acc:ZDB-GENE-030131-8448]	chr2:20763673-20771677
ENSDART00000154620	1140.84	1454.18	753.186	3603.53	5496.97	1116.07	4550.25	-2.04689	0.0240285			cdna:known chromosome:Zv9:3:22360180:22363883:1 gene:ENSDARG00000088238 gene_biotype:protein_coding transcript_biotype:retained_intron	chr3:22360180-22363883
ENSDART00000157292	5302.07	5596.41	8543.47	14588.3	12521.1	6480.65	13554.7	-1.09455	0.0240378			havana:lincRNA chromosome:Zv9:7:71873159:71874556:1 gene:ENSDARG00000097625 gene_biotype:lincRNA transcript_biotype:lincRNA	chr7:71873159-71874556
ENSDART00000130326	625.245	7774.76	4331.18	63.6025	36.6208	4243.73	50.1117	5.83833	0.0240425	rbb4	GO:0005515 (protein binding)	retinoblastoma binding protein 4 [Source:ZFIN;Acc:ZDB-GENE-030131-445]	chr19:32243949-32252815
ENSDART00000062578	2084.64	1497.63	270.491	40.7918	25.94	1284.26	33.3659	4.86084	0.0240792	zgc:110348	GO:0050662 (coenzyme binding)	tissue specific transplantation antigen P35B [Source:HGNC Symbol;Acc:HGNC:12390]	chr20:49109432-49145345
ENSDART00000020576	9315.18	1644.99	4054.59	183.174	219.036	5004.92	201.105	4.30548	0.0241227	cdc25	GO:0004725 (protein tyrosine phosphatase activity)	cell division cycle 25 homolog [Source:ZFIN;Acc:ZDB-GENE-000330-5]	chr13:14776347-14790249
ENSDART00000086491	30.0305	57.4227	42.9804	14.5637	16.7274	43.4779	15.6456	1.42828	0.0241711	im:6912630		suppressor of IKBKE 1 [Source:HGNC Symbol;Acc:HGNC:26119]	chr23:39902806-39914394
ENSDART00000115170	13725.9	701.855	638.602	4.86475	8.22718	5022.12	6.54597	8.17809	0.0243746	larp4aa		La ribonucleoprotein domain family, member 4Aa [Source:ZFIN;Acc:ZDB-GENE-090313-50]	chr23:27749667-27788568
ENSDART00000149358	131.704	176.882	376.408	907.592	1521.04	228.331	1214.32	-2.51039	0.0243751	tnni1b	GO:0005861 (troponin complex)	troponin I, skeletal, slow b [Source:ZFIN;Acc:ZDB-GENE-041212-37]	chr6:54780503-54799708
ENSDART00000112389	16110.6	14278.6	7484.3	28.6335	9.7512	12624.5	19.1924	9.48637	0.0243812	wdr43	GO:0005515 (protein binding)	WD repeat domain 43 [Source:ZFIN;Acc:ZDB-GENE-021231-3]	chr17:24649784-24663840
ENSDART00000126695	1373.97	1326.72	2009.35	3792.27	2991.86	1570.01	3392.06	-1.12774	0.0244147		GO:0005515 (protein binding)	Uncharacterized protein [Source:UniProtKB/TrEMBL;Acc:H9GYN0]	chrZv9_scaffold3498:41946-62861
ENSDART00000151641	351.527	2135.13	3555.45	17.0901	16.723	2014.03	16.9065	6.35838	0.0244168	zgc:173742	GO:0003917 (DNA topoisomerase type I activity)		chr18:13863073-13918130
ENSDART00000060955	7.216	6.37483	11.2822	2.69924	2.74327	8.29101	2.72126	1.56229	0.0244761	nudt18	GO:0016787 (hydrolase activity)	nudix (nucleoside diphosphate linked moiety X)-type motif 18 [Source:ZFIN;Acc:ZDB-GENE-050417-388]	chr8:48096294-48106461
GENSCAN00000028349	4745.46	4938.53	7965.51	16032.5	16278.7	5883.17	16155.6	-1.49912	0.0244956			cdna:genscan chromosome:Zv9:24:39081907:39108366:-1 transcript_biotype:protein_coding	chr24:39081907-39108366
ENSDART00000146441	522.531	265.032	307.171	1071.77	1607.17	364.911	1339.47	-1.91061	0.0245037			havana:processed_transcript chromosome:Zv9:4:46508264:46509771:1 gene:ENSDARG00000095194 gene_biotype:processed_transcript transcript_biotype:processed_transcript	chr4:46508264-46509771
ENSDART00000138377	7444.27	1253.66	9657.14	257.84	131.134	6118.36	194.487	4.60779	0.0245088	elovl1b	GO:0016021 (integral component of membrane)	elongation of very long chain fatty acids (FEN1/Elo2, SUR4/Elo3, yeast)-like 1b [Source:ZFIN;Acc:ZDB-GENE-040426-2755]	chr11:13280627-13337829
ENSDART00000135577	37783.8	60311.1	34379.8	325.175	142.052	44158.2	233.614	7.63729	0.0245503			cdna:known chromosome:Zv9:10:21522183:21524617:1 gene:ENSDARG00000043976 gene_biotype:protein_coding transcript_biotype:processed_transcript	chr10:21522183-21524617
ENSDART00000112324	363.794	531.26	259.58	1282.13	1178.56	384.878	1230.34	-1.7368	0.0245576		GO:0005488 (binding)	nuclear cap binding protein subunit 1, 80kDa [Source:HGNC Symbol;Acc:HGNC:7658]	chr14:53351123-53353384
ENSDART00000117021	53.5237	32.082	47.2802	85.0017	103.106	44.2953	94.0537	-1.11238	0.024611			ncrna:miRNA chromosome:Zv9:4:17721332:17721425:-1 gene:ENSDARG00000081807 gene_biotype:miRNA transcript_biotype:miRNA	chr4:17721332-17721425
ENSDART00000136601	42450.2	14221.4	10713.8	1353.16	1458.19	22461.8	1405.67	3.72944	0.0246139			cdna:known chromosome:Zv9:5:43134797:43139135:1 gene:ENSDARG00000020008 gene_biotype:protein_coding transcript_biotype:processed_transcript	chr5:43134797-43139135
ENSDART00000104299	377.702	22076.9	3742.4	2.83961	4.82229	8732.34	3.83095	9.73266	0.0246721	cnp	GO:0004113 (2',3'-cyclic-nucleotide 3'-phosphodiesterase activity)	2',3'-cyclic nucleotide 3' phosphodiesterase [Source:ZFIN;Acc:ZDB-GENE-030521-29]	chr3:17376816-17381225
GENSCAN00000013314	2996.19	3065.26	3070.58	9422.71	10454.1	3044.01	9938.38	-1.70518	0.0246971			cdna:genscan scaffold:Zv9:Zv9_NA602:4729:8362:1 transcript_biotype:protein_coding
ENSDART00000077933	638.602	1412.03	730.869	3663.17	2583.23	927.167	3123.2	-1.82165	0.0247084	si:ch211-193e5.3	GO:0016773 (phosphotransferase activity, alcohol group as acceptor)	si:ch211-193e5.3 [Source:ZFIN;Acc:ZDB-GENE-091116-7]	chr24:5993051-5995352
ENSDART00000134733	16.7253	21.963	8.28185	4.06188	2.89927	15.6567	3.48058	2.07805	0.0247321	chrna7	GO:0005230 (extracellular ligand-gated ion channel activity)	cholinergic receptor, nicotinic, alpha polypeptide 7 [Source:ZFIN;Acc:ZDB-GENE-040108-3]	chr7:55654509-55682905
ENSDART00000026303	35.5797	4.25059	89.9727	3301.1	5032.8	43.2677	4166.95	-7.41558	0.0247467	rasd1	GO:0000166 (nucleotide binding)	RAS, dexamethasone-induced 1 [Source:ZFIN;Acc:ZDB-GENE-040426-1473]	chr12:1576092-1577697
ENSDART00000135344	10335.5	19213.9	17068.8	4683.34	4945.03	15539.4	4814.18	1.64221	0.0248437	ppp2r1a	GO:0005488 (binding)	protein phosphatase 2 (formerly 2A), regulatory subunit A (PR 65), alpha isoform [Source:ZFIN;Acc:ZDB-GENE-040426-2700]	chr5:59122333-59147207
ENSDART00000149770	1972.48	4695.76	2252.74	10459.1	12580.8	2973.66	11520	-2.0589	0.0249191			cdna:pseudogene chromosome:Zv9:10:6325731:6327540:-1 gene:ENSDARG00000095973 gene_biotype:unprocessed_pseudogene transcript_biotype:unprocessed_pseudogene	chr10:6325731-6327540
ENSDART00000048729	1130.92	1351.28	2832.39	2.98292	9.01234	1771.53	5.99763	8.29608	0.0249809	lgals9l1	GO:0030246 (carbohydrate binding)	lectin, galactoside-binding, soluble, 9 (galectin 9)-like 1 [Source:ZFIN;Acc:ZDB-GENE-030131-9543]	chr15:30329807-30340735
ENSDART00000128607	318.614	1152.76	3902.63	12.9239	12.5283	1791.33	12.7261	6.46938	0.0250017	igfbp5b	GO:0005520 (insulin-like growth factor binding)	insulin-like growth factor binding protein 5b [Source:ZFIN;Acc:ZDB-GENE-040319-2]	chr9:47869570-47891113
ENSDART00000140829	287.818	234.204	501.94	93.0009	119.055	341.321	106.028	1.62001	0.0250196	si:dkey-78l4.10	GO:0004252 (serine-type endopeptidase activity)		chr22:19813325-19814836
ENSDART00000002595	32229.3	34165.9	22949.6	12677.8	15849.5	29781.6	14263.6	1.04976	0.0250526	rpl21	GO:0003735 (structural constituent of ribosome)	ribosomal protein L21 [Source:ZFIN;Acc:ZDB-GENE-030131-8512]	chr24:22229602-22233473
ENSDART00000131455	5.46583	23.9443	35.9981	557.84	1954.39	21.8027	1256.12	-5.96081	0.0250575	si:dkey-19p15.5	GO:0004713 (protein tyrosine kinase activity)	si:dkey-33c12.7 [Source:ZFIN;Acc:ZDB-GENE-081028-9]	chr13:8579162-8582346
GENSCAN00000016959	1292.88	6179.41	8648.25	57.8059	180.962	5373.51	119.384	5.32626	0.0251183			cdna:genscan chromosome:Zv9:4:30985401:30985994:1 transcript_biotype:protein_coding	chr4:30985401-30985994
ENSDART00000155693	31558.9	3963.55	16742.1	722.211	436.842	17421.5	579.526	4.50956	0.0251198	si:dkey-83h2.6	GO:0004222 (metalloendopeptidase activity)	endothelin converting enzyme 2 [Source:HGNC Symbol;Acc:HGNC:13275]	chr15:4032047-4106634
ENSDART00000103220	763.843	202.896	1184.4	25.8109	22.2928	717.047	24.0519	4.56635	0.0251406	krtcap2	GO:0003674 (molecular_function)	keratinocyte associated protein 2 [Source:ZFIN;Acc:ZDB-GENE-060825-91]	chr16:25622657-25627912
ENSDART00000102751	30.3928	68.7532	46.5194	196.761	187.775	48.5551	192.268	-2.06366	0.0251543	si:dkey-179j5.5	GO:0030246 (carbohydrate binding)	si:dkey-179j5.5 [Source:ZFIN;Acc:ZDB-GENE-070705-320]	chr22:25463350-25469191
ENSDART00000130290	11.7136	20.2897	12.6432	39.438	36.2809	14.8822	37.8595	-1.3903	0.0251733	sgk494b	GO:0004672 (protein kinase activity)	uncharacterized serine/threonine-protein kinase SgK494b [Source:ZFIN;Acc:ZDB-GENE-120215-252]	chr21:38480625-38505084
ENSDART00000105874	519.14	86.7064	89.5283	4980.2	2146.38	231.792	3563.29	-4.36073	0.0251886	dennd2da		DENN/MADD domain containing 2Da [Source:ZFIN;Acc:ZDB-GENE-061013-542]	chr8:13506323-13546248
ENSDART00000128363	20840.3	9589.51	511.134	10.1278	31.1651	10313.6	20.6465	8.03957	0.025311			cdna:known chromosome:Zv9:7:60626995:60632121:-1 gene:ENSDARG00000007385 gene_biotype:protein_coding transcript_biotype:processed_transcript	chr7:60626995-60632121
ENSDART00000057422	90.5619	82.2697	88.2603	33.8651	38.8906	87.0306	36.3779	1.26073	0.0253296	pacsin1a	GO:0005515 (protein binding)	protein kinase C and casein kinase substrate in neurons 1a [Source:ZFIN;Acc:ZDB-GENE-050522-155]	chr23:3668848-3717291
ENSDART00000111646	5.45853	8.51469	23.4667	1197.78	377.641	12.48	787.71	-6.02984	0.0253433	suds3		suppressor of defective silencing 3 homolog (SDS3, S. cerevisiae) [Source:ZFIN;Acc:ZDB-GENE-040801-236]	chr5:17266480-17284907
ENSDART00000082393	7912.09	1341.1	3934.21	161.484	198.68	4395.8	180.082	4.27553	0.0253455	cdc25	GO:0004725 (protein tyrosine phosphatase activity)	cell division cycle 25 homolog [Source:ZFIN;Acc:ZDB-GENE-000330-5]	chr13:14776347-14790249
ENSDART00000137472	26513.3	14802.5	12001.1	2.75923	9.29393	17772.3	6.02658	11.6927	0.0253718	qars	GO:0004819 (glutamine-tRNA ligase activity)	glutaminyl-tRNA synthetase [Source:ZFIN;Acc:ZDB-GENE-040426-1011]	chr8:48507066-48539923
GENSCAN00000032922	1208.65	13467.6	8703.61	69.5681	57.124	7793.29	63.346	6.36974	0.0253927			cdna:genscan chromosome:Zv9:13:23794097:23794652:-1 transcript_biotype:protein_coding	chr13:23794097-23794652
ENSDART00000115422	5215.68	1862.4	254.423	10.1508	19.9467	2444.17	15.0487	6.57009	0.0254039	nudcd2	GO:0003674 (molecular_function)	NudC domain containing 2 [Source:ZFIN;Acc:ZDB-GENE-040801-49]	chr14:23143223-23155029
ENSDART00000083505	15942.9	7226.9	1087.99	33.9756	125.474	8085.94	79.7246	6.26025	0.025476	dad1	GO:0004579 (dolichyl-diphosphooligosaccharide-protein glycotransferase activity)	defender against cell death 1 [Source:ZFIN;Acc:ZDB-GENE-060503-233]	chr2:51762047-51765500
ENSDART00000112298	150.616	117.981	73.86	383.282	356.588	114.152	369.935	-1.75557	0.0254881	map2	GO:0015631 (tubulin binding)	microtubule-associated protein 2 [Source:ZFIN;Acc:ZDB-GENE-041010-118]	chr9:39935697-40045681
ENSDART00000129131	123.177	113.623	156.306	331.96	439.069	131.035	385.515	-1.55628	0.0255248			Uncharacterized protein [Source:UniProtKB/TrEMBL;Acc:F1R1M3]	chr5:4500674-4502906
ENSDART00000126840	8762.36	6222.2	260.746	2.82345	3.94234	5081.77	3.38289	9.50402	0.0255473	supt16h	GO:0003674 (molecular_function)	suppressor of Ty 16 homolog (S. cerevisiae) [Source:ZFIN;Acc:ZDB-GENE-031118-96]	chr7:1689457-1757060
ENSDART00000100145	1250.38	1494.67	2695.05	3.00061	8.31356	1813.37	5.65709	8.42292	0.0255473	lgals9l1	GO:0016936 (galactoside binding)	lectin, galactoside-binding, soluble, 9 (galectin 9)-like 1 [Source:ZFIN;Acc:ZDB-GENE-030131-9543]	chr15:30329807-30340735
ENSDART00000136377	8750.3	301.51	13000.4	3.62824	7.25039	7350.74	5.43932	9.30715	0.0255613			havana:processed_transcript chromosome:Zv9:9:19526767:19529744:-1 gene:ENSDARG00000092033 gene_biotype:processed_transcript transcript_biotype:lincRNA	chr9:19526767-19529744
ENSDART00000124851	117.796	149.731	677.577	4856.91	2410.3	315.035	3633.6	-3.90353	0.0256378		GO:0005242 (inward rectifier potassium channel activity)	Uncharacterized protein [Source:UniProtKB/TrEMBL;Acc:E7FD27]	chr7:7388888-7416377
ENSDART00000006787	2.76489	2.88094	28.7461	1272.86	302.37	11.464	787.614	-6.664	0.0256712	epha3	GO:0005515 (protein binding)	eph receptor A3 [Source:ZFIN;Acc:ZDB-GENE-010724-10]	chr9:16828231-16919914
ENSDART00000109822	3.84679	5.23966	60.8857	1224.79	474.311	23.3241	849.549	-6.15362	0.0256804	hps1	GO:0008150 (biological_process)	Hermansky-Pudlak syndrome 1 [Source:ZFIN;Acc:ZDB-GENE-051113-152]	chr13:41298191-41328758
ENSDART00000129813	42.7422	67.8438	35.2704	147.55	152.971	48.6188	150.26	-1.68371	0.0257295	scpp9		secretory calcium-binding phosphoprotein 9 [Source:ZFIN;Acc:ZDB-GENE-090424-3]	chr1:44352317-44355588
ENSDART00000075152	1282.13	1459.16	1009.32	3338.24	4533.99	1250.2	3936.11	-1.65425	0.0258069	si:dkey-76d14.1	GO:0004252 (serine-type endopeptidase activity)	protease, serine, 56 [Source:HGNC Symbol;Acc:HGNC:39433]	chr2:45110791-45121551
ENSDART00000111354	141.921	20.0975	11.6115	836.542	2236.41	57.8767	1536.47	-5.41251	0.0258152			Uncharacterized protein [Source:UniProtKB/TrEMBL;Acc:E7F0D1]	chr12:34288838-34340681
ENSDART00000136465	10951.3	13698.9	15129.1	36.0744	70.1477	13259.8	53.111	8.02926	0.0258173	eftud2	GO:0005525 (GTP binding)	elongation factor Tu GTP binding domain containing 2 [Source:ZFIN;Acc:ZDB-GENE-040426-1569]	chr3:16009001-16033616
ENSDART00000067793	363.166	1601.2	3315.79	41.8522	29.7729	1760.05	35.8125	5.13994	0.0258229	ints3	GO:0070876 (SOSS complex)	integrator complex subunit 3 [Source:ZFIN;Acc:ZDB-GENE-060503-634]	chr19:27125761-27159524
GENSCAN00000028951	3.11652	2.71946	6.7611	360.353	1034.3	4.19903	697.329	-7.30702	0.0258391			cdna:genscan chromosome:Zv9:1:53907021:54001164:1 transcript_biotype:protein_coding	chr1:53907021-54001164
ENSDART00000154153	20.5069	37.9074	10.5351	170.252	187.7	22.9831	178.976	-3.14871	0.0258459	si:ch211-189k9.2		si:ch211-189k9.2 [Source:ZFIN;Acc:ZDB-GENE-100405-5]	chr17:23765419-23785194
ENSDART00000086564	622.622	592.802	286.485	2684.19	4916.85	500.636	3800.52	-2.94158	0.0259391	spns2	GO:0022857 (transmembrane transporter activity)	spinster homolog 2 (Drosophila) [Source:ZFIN;Acc:ZDB-GENE-030131-5843]	chr5:32445813-32563380
ENSDART00000142040	5635.93	5361.78	8862.51	15345.1	13440.2	6620.07	14392.6	-1.15573	0.0259544			havana:processed_transcript chromosome:Zv9:3:26954707:26958613:-1 gene:ENSDARG00000095672 gene_biotype:processed_transcript transcript_biotype:processed_transcript	chr3:26954707-26958613
ENSDART00000097644	60.9495	30.0133	46.4168	145.293	131.968	45.7932	138.63	-1.65555	0.0259548	ephb4b	GO:0005515 (protein binding)	eph receptor B4b [Source:ZFIN;Acc:ZDB-GENE-990415-65]	chr23:44476384-44528029
ENSDART00000154243	139.833	50.3028	19.3169	1438.14	1633.41	69.8177	1535.78	-4.89786	0.0259846	si:dkey-190l8.2	GO:0022857 (transmembrane transporter activity)	si:dkey-190l8.2 [Source:ZFIN;Acc:ZDB-GENE-030131-9103]	chr17:30650397-30664844
ENSDART00000113515	16.3195	17.5826	20.4939	33.9814	41.2191	18.132	37.6003	-1.05205	0.0259967	gab2		GRB2-associated binding protein 2 [Source:ZFIN;Acc:ZDB-GENE-130530-756]	chr15:21670449-21818999
ENSDART00000155533	41.2674	35.6614	24.6166	21461.3	9106.59	33.8485	15283.9	-8.72281	0.0259986	im:7143333	GO:0046872 (metal ion binding)	im:7143333 [Source:ZFIN;Acc:ZDB-GENE-041111-186]	chr15:741092-744566
ENSDART00000128923	7951.32	1343.43	11054.2	283.595	144.705	6782.99	214.15	4.598	0.0260178	elovl1b	GO:0016021 (integral component of membrane)	elongation of very long chain fatty acids (FEN1/Elo2, SUR4/Elo3, yeast)-like 1b [Source:ZFIN;Acc:ZDB-GENE-040426-2755]	chr11:13280627-13337829
ENSDART00000101870	780.396	416.221	464.632	1875.61	2938.68	553.75	2407.14	-2.14064	0.0260213	proza	GO:0005515 (protein binding)	protein Z, vitamin K-dependent plasma glycoprotein a [Source:ZFIN;Acc:ZDB-GENE-061013-403]	chr3:63044926-63055718
ENSDART00000004333	156.837	64.255	40.4909	769.439	1813.14	87.1942	1291.29	-3.99318	0.0260254	tbx15	GO:0003700 (sequence-specific DNA binding transcription factor activity)	T-box 15 [Source:ZFIN;Acc:ZDB-GENE-020529-1]	chr9:22068233-22101316
ENSDART00000017172	12106.3	14303.3	13905.7	36.0454	62.6318	13438.4	49.3386	8.14003	0.0260567	eftud2	GO:0000166 (nucleotide binding)	elongation factor Tu GTP binding domain containing 2 [Source:ZFIN;Acc:ZDB-GENE-040426-1569]	chr3:16009001-16033616
ENSDART00000041381	317.194	1969.87	5710.05	9.05813	9.21774	2665.71	9.13793	7.38565	0.0261105	zgc:171788	GO:0005515 (protein binding)	microtubule-associated protein, RP/EB family, member 2 [Source:HGNC Symbol;Acc:HGNC:6891]	chr24:37175601-37204029
ENSDART00000097452	14.3113	13.6826	18.4515	41.8203	32.6447	15.4818	37.2325	-1.26778	0.0262185			ensembl:processed_transcript chromosome:Zv9:5:50802441:50811660:-1 gene:ENSDARG00000052693 gene_biotype:processed_transcript transcript_biotype:processed_transcript	chr5:50802441-50811660
ENSDART00000114347	125.438	196.511	57.1446	16.1739	23.1202	126.365	19.6471	2.53527	0.0262224	scly	GO:0016829 (lyase activity)	selenocysteine lyase [Source:ZFIN;Acc:ZDB-GENE-080204-30]	chr6:26983944-27001142
ENSDART00000145726	8145.88	1355.62	11066.8	280.75	148.248	6856.12	214.499	4.60435	0.0262469	elovl1b	GO:0016021 (integral component of membrane)	elongation of very long chain fatty acids (FEN1/Elo2, SUR4/Elo3, yeast)-like 1b [Source:ZFIN;Acc:ZDB-GENE-040426-2755]	chr11:13280627-13337829
ENSDART00000123326	6807.34	599.097	14144.6	16.8666	27.9873	7183.69	22.427	7.47443	0.0262499	polr1a	GO:0003899 (DNA-directed RNA polymerase activity)	polymerase (RNA) I polypeptide A [Source:ZFIN;Acc:ZDB-GENE-030131-5286]	chr14:20081338-20140596
ENSDART00000080103	3.62989	4.32682	2.95328	6.71076	8.4601	3.63667	7.58543	-1.06839	0.0262927	mxd3	GO:0046983 (protein dimerization activity)	MAX dimerization protein 3 [Source:ZFIN;Acc:ZDB-GENE-040426-1588]	chr14:19999132-20012348
ENSDART00000135737	2288.62	1215.71	1777.14	4569.92	3767.76	1760.49	4168.84	-1.28433	0.0262989	si:dkey-204l2.3	GO:0005515 (protein binding)	si:dkey-204l2.3 [Source:ZFIN;Acc:ZDB-GENE-070705-370]	chr4:56359382-56386191
ENSDART00000147406	821.971	1631.24	784.173	3972.72	4203.1	1079.13	4087.91	-2.00667	0.0263758			havana:processed_transcript chromosome:Zv9:18:31851858:31853993:1 gene:ENSDARG00000092510 gene_biotype:processed_transcript transcript_biotype:processed_transcript	chr18:31851858-31853993
ENSDART00000135970	32.0773	37.5158	366.641	8843.22	8680.16	145.411	8761.69	-6.84655	0.0264203			cdna:known chromosome:Zv9:11:25272955:25273889:1 gene:ENSDARG00000011613 gene_biotype:protein_coding transcript_biotype:processed_transcript	chr11:25272955-25273889
ENSDART00000097531	28148.8	13799.3	18386.8	6799.49	6028.59	20111.7	6414.04	1.58875	0.026431	tomm7	GO:0005742 (mitochondrial outer membrane translocase complex)	translocase of outer mitochondrial membrane 7 homolog (yeast) [Source:ZFIN;Acc:ZDB-GENE-060825-115]	chr19:3109049-3118843
ENSDART00000067072	3504.48	6430.6	206.261	2.75461	3.05274	3380.44	2.90368	9.1687	0.0264741	nfybb	GO:0046982 (protein heterodimerization activity)	nuclear transcription factor Y, beta b [Source:ZFIN;Acc:ZDB-GENE-050306-25]	chr25:29690656-29713649
ENSDART00000147533	3832.74	3794.33	5644.78	11393.8	8762.36	4423.95	10078.1	-1.20104	0.0264759			havana:processed_transcript chromosome:Zv9:8:22981468:22982624:1 gene:ENSDARG00000093200 gene_biotype:processed_transcript transcript_biotype:processed_transcript	chr8:22981468-22982624
GENSCAN00000011402	8534.37	10464.4	14431.7	24695.6	21574.6	11143.5	23135.1	-1.08476	0.0264932			cdna:genscan chromosome:Zv9:13:48528372:48532055:-1 transcript_biotype:protein_coding	chr13:48528372-48532055
ENSDART00000074829	52.3695	22.4771	42.916	133.48	154.682	39.2542	144.081	-1.95866	0.0264987	ankrd2	GO:0005515 (protein binding)	ankyrin repeat domain 2 (stretch responsive muscle) [Source:ZFIN;Acc:ZDB-GENE-090313-383]	chr13:41341677-41353079
ENSDART00000118670	2.95278	8.42813	4.64567	26.7088	22.3983	5.34219	24.5535	-2.32789	0.0265082			ncrna:miRNA chromosome:Zv9:10:39415823:39415937:-1 gene:ENSDARG00000083557 gene_biotype:miRNA transcript_biotype:miRNA	chr10:39415823-39415937
ENSDART00000132028	12790.6	4838.09	1169.17	120.079	31.7232	6265.95	75.9009	6.07711	0.026532	pitpnaa	GO:0003674 (molecular_function)	phosphatidylinositol transfer protein, alpha a [Source:ZFIN;Acc:ZDB-GENE-040426-744]	chr15:27759548-27773895
ENSDART00000147492	2823.79	5378.45	2747.28	1030.27	1367.81	3649.84	1199.04	1.54683	0.0265321			havana:processed_transcript chromosome:Zv9:2:26203801:26206053:-1 gene:ENSDARG00000094683 gene_biotype:processed_transcript transcript_biotype:processed_transcript	chr2:26203801-26206053
ENSDART00000141843	4980.9	5200.45	8459.49	15520.8	12400	6213.61	13960.4	-1.20233	0.0265484			havana:processed_transcript chromosome:Zv9:3:3187106:3191292:-1 gene:ENSDARG00000092212 gene_biotype:processed_transcript transcript_biotype:processed_transcript	chr3:3187106-3191292
ENSDART00000146095	8629.7	1397.48	6278.14	180.541	152.506	5435.11	166.524	4.67215	0.0265793			cdna:known chromosome:Zv9:1:2029047:2045559:1 gene:ENSDARG00000040245 gene_biotype:protein_coding transcript_biotype:processed_transcript	chr1:2029047-2045559
ENSDART00000131246	139.193	358.36	356.588	48.2055	42.2912	284.714	45.2484	2.5314	0.0266153	si:ch73-286h23.4	GO:0005515 (protein binding)	si:ch73-286h23.4 [Source:ZFIN;Acc:ZDB-GENE-070705-237]	chr22:9717827-9729017
ENSDART00000097389	10340.9	18750.2	17214	4878.53	4955.89	15435	4917.21	1.60375	0.0266287	ppp2r1a	GO:0005488 (binding)	protein phosphatase 2 (formerly 2A), regulatory subunit A (PR 65), alpha isoform [Source:ZFIN;Acc:ZDB-GENE-040426-2700]	chr5:59122333-59147207
ENSDART00000149817	12595.7	823.179	4513.18	35.1822	47.9167	5977.37	41.5494	6.4556	0.0266396	chst10		carbohydrate sulfotransferase 10 [Source:ZFIN;Acc:ZDB-GENE-040808-40]	chr1:27013564-27028673
ENSDART00000009076	2.7134	2.77162	2.74327	4150.19	7892.52	2.74276	6021.36	-11.027	0.0266992	pik3cg	GO:0005488 (binding)	phosphoinositide-3-kinase, catalytic, gamma polypeptide [Source:ZFIN;Acc:ZDB-GENE-040426-2532]	chr4:3214042-3224466
ENSDART00000157148	14337.9	3639.77	754.988	25.7198	21.2836	6244.2	23.5017	7.18425	0.0267328	cinp		cyclin-dependent kinase 2 interacting protein [Source:ZFIN;Acc:ZDB-GENE-050506-72]	chr17:31680898-31682332
ENSDART00000143677	19.7699	13.243	14.6697	4.22282	2.89918	15.8942	3.561	2.16213	0.0267839	grm6b	GO:0001642 (group III metabotropic glutamate receptor activity)	glutamate receptor, metabotropic 6b [Source:ZFIN;Acc:ZDB-GENE-021120-2]	chr11:26567600-26612992
ENSDART00000053106	9972.04	975.854	3240.6	57.936	67.3754	4729.5	62.6557	5.66014	0.0267854	s1pr2	GO:0038036 (sphingosine-1-phosphate receptor activity)	sphingosine-1-phosphate receptor 2 [Source:ZFIN;Acc:ZDB-GENE-020123-2]	chr3:55468476-55469588
GENSCAN00000024336	10272.7	7291.51	2550.43	519.216	624.644	6704.88	571.93	3.33815	0.0267984			cdna:genscan scaffold:Zv9:Zv9_scaffold3547:218347:219147:-1 transcript_biotype:protein_coding
ENSDART00000140343	13.1471	19.4767	155.781	5101.59	1309.93	62.8017	3205.76	-6.24142	0.0268149	taar19d	GO:0004871 (signal transducer activity)	trace amine associated receptor 19d [Source:ZFIN;Acc:ZDB-GENE-060413-18]	chr10:42134332-42135363
ENSDART00000127790	29.6093	17.6337	19.5719	796.455	1612.2	22.2716	1204.33	-5.70648	0.0268514	sgcg	GO:0003674 (molecular_function)	sarcoglycan, gamma [Source:ZFIN;Acc:ZDB-GENE-030724-2]	chr15:21900646-21928012
ENSDART00000075744	155.431	47.6082	42.1053	751.484	1842.13	81.7149	1296.81	-4.11731	0.0268886	aldob	GO:0016829 (lyase activity)	aldolase b, fructose-bisphosphate [Source:ZFIN;Acc:ZDB-GENE-030131-383]	chr14:22107711-22116461
ENSDART00000151740	8.80961	32.8246	35.5421	630.304	2000.74	25.7254	1315.52	-5.6907	0.0268914	si:dkey-84o3.12	GO:0016740 (transferase activity)	si:dkey-84o3.12 [Source:ZFIN;Acc:ZDB-GENE-120214-10]	chr21:4642725-4645921
ENSDART00000076735	4950.01	810.272	2966.05	40.4038	121.871	2908.78	81.1373	5.02379	0.0269254		GO:0005515 (protein binding)	low density lipoprotein receptor-related protein 10 [Source:HGNC Symbol;Acc:HGNC:14553]	chr7:25320946-25329472
ENSDART00000126846	3142.7	2032.73	3501.87	5838.93	6811.54	2892.43	6325.24	-1.16233	0.0269982			ncrna:rRNA chromosome:Zv9:10:30599324:30599438:-1 gene:ENSDARG00000090370 gene_biotype:rRNA transcript_biotype:rRNA	chr10:30599324-30599438
ENSDART00000143986	41.3996	15.1714	7.78637	2056.38	600.039	21.4524	1328.21	-6.03214	0.0270042	si:ch211-88n13.1	GO:0005515 (protein binding)	ABI family, member 3 (NESH) binding protein [Source:HGNC Symbol;Acc:HGNC:17265]	chr9:31165806-31194205
ENSDART00000127044	697.48	327.081	385.957	1183.5	1508.99	470.173	1346.24	-1.58683	0.0270786	armc1	GO:0005488 (binding)	armadillo repeat containing 1 [Source:ZFIN;Acc:ZDB-GENE-041212-33]	chr24:25309728-25332232
ENSDART00000152334	2475.3	6584.71	3295.67	13315.8	17587.7	4118.56	15451.7	-2.02001	0.0270863			havana:lincRNA chromosome:Zv9:1:25539504:25541329:-1 gene:ENSDARG00000053731 gene_biotype:lincRNA transcript_biotype:lincRNA	chr1:25539504-25541329
ENSDART00000122455	16.4177	3.83188	5.19665	199.088	627.349	8.48206	413.219	-5.68092	0.0271089			Uncharacterized protein [Source:UniProtKB/TrEMBL;Acc:E7FDR7]	chr14:43491368-43494305
ENSDART00000153407	4.47645	47.5412	2.75487	1078.61	336.293	18.2575	707.453	-6.16912	0.0272558			havana:antisense chromosome:Zv9:20:51505251:51506772:1 gene:ENSDARG00000094456 gene_biotype:antisense transcript_biotype:antisense	chr20:51505251-51506772
ENSDART00000138669	562.939	1749.18	2408.99	16485.9	13667.1	1573.7	15076.5	-3.49252	0.0273906	cep89		centrosomal protein 89 [Source:ZFIN;Acc:ZDB-GENE-040426-1210]	chr7:39787299-39867900
ENSDART00000142071	5.97545	16.6114	9.11219	33.3398	48.1149	10.5663	40.7273	-2.05014	0.027425	rbm14a	GO:0008270 (zinc ion binding)	RNA binding motif protein 14a [Source:ZFIN;Acc:ZDB-GENE-050522-496]	chr21:26765065-26777052
ENSDART00000152526	4.42232	2.74767	2.70731	10.3147	15.5142	3.29243	12.9144	-1.98112	0.0274675	si:dkey-25p11.3	GO:0005216 (ion channel activity)	potassium voltage-gated channel, subfamily H (eag-related), member 6 [Source:HGNC Symbol;Acc:HGNC:18862]	chr12:10074985-10101529
GENSCAN00000021794	1796.25	2146.38	1266.46	3703.85	4021.44	1736.36	3862.64	-1.1858	0.0274817			cdna:genscan chromosome:Zv9:17:46607866:46665244:-1 transcript_biotype:protein_coding	chr17:46607866-46665244
ENSDART00000132275	35.5339	27.524	23.5186	57.0536	74.1301	28.8588	65.5918	-1.19329	0.0275288	si:dkey-24g18.3	GO:0004930 (G-protein coupled receptor activity)	si:dkey-24g18.3 [Source:ZFIN;Acc:ZDB-GENE-081104-390]	chr7:24728126-24729100
ENSDART00000129779	406.99	40.9679	141.906	5834.14	2232.81	196.621	4033.48	-4.75945	0.0275332			cdna:putative chromosome:Zv9:17:28729287:28760393:1 gene:ENSDARG00000054213 gene_biotype:protein_coding transcript_biotype:processed_transcript	chr17:28729287-28760393
ENSDART00000150523	6160.02	5286.29	8141.73	15830.3	21748	6529.34	18789.2	-1.53021	0.0276281	si:dkey-78k22.2		si:dkey-78k22.2 [Source:ZFIN;Acc:ZDB-GENE-110914-149]	chr4:48368476-48369812
ENSDART00000132989	2179.2	1133.17	1713.53	4415.99	3699.58	1675.3	4057.79	-1.32134	0.027697	si:ch211-106j21.4	GO:0005515 (protein binding)	NLR family, pyrin domain containing 1 [Source:HGNC Symbol;Acc:HGNC:14374]	chr4:61672620-61696688
ENSDART00000155008	7099.41	4964.79	1945.26	7.77095	29.1218	4669.82	18.4464	8.08786	0.0276974	cd3eap		CD3e molecule, epsilon associated protein [Source:ZFIN;Acc:ZDB-GENE-101202-2]	chr15:28135771-28151144
ENSDART00000024282	22962.6	14369.2	5146.81	1902.22	1077.97	14159.5	1490.1	3.0586	0.0277099	ewsr1a	GO:0000166 (nucleotide binding)	Ewing sarcoma breakpoint region 1a [Source:ZFIN;Acc:ZDB-GENE-030131-2317]	chr10:7004085-7016917
ENSDART00000041615	6.40125	4.50278	7.12601	2.72615	2.92609	6.01001	2.82612	1.06283	0.0277533	ugt5g1	GO:0016757 (transferase activity, transferring glycosyl groups)	UDP glucuronosyltransferase 5 family, polypeptide G1 [Source:ZFIN;Acc:ZDB-GENE-080305-10]	chr7:23859052-23864077
ENSDART00000123771	136.572	101.421	68.7038	2404.24	5137.32	102.232	3770.78	-5.15907	0.0277545	ctnnb2	GO:0005488 (binding)	catenin, beta 2 [Source:ZFIN;Acc:ZDB-GENE-040426-2575]	chr19:49721962-49734841
ENSDART00000156873	5432.8	5153.25	8323.03	14536.3	13634.2	6303.03	14085.3	-1.19394	0.0278136			havana:lincRNA chromosome:Zv9:15:18188086:18191831:1 gene:ENSDARG00000097663 gene_biotype:lincRNA transcript_biotype:lincRNA	chr15:18188086-18191831
ENSDART00000138527	11.8041	17.8403	9.56169	4544.06	1840.26	13.0687	3192.16	-7.83921	0.0278479	rab20	GO:0000166 (nucleotide binding)	RAB20, member RAS oncogene family [Source:ZFIN;Acc:ZDB-GENE-030131-9143]	chr9:8943700-8951415
ENSDART00000027782	6009.07	12553.3	3978.83	395.475	852.204	7513.73	623.839	3.5277	0.0279171	mknk2a	GO:0016773 (phosphotransferase activity, alcohol group as acceptor)	MAP kinase-interacting serine/threonine kinase 2a [Source:ZFIN;Acc:ZDB-GENE-030131-6099]	chr2:22464436-22482596
ENSDART00000127652	6.97872	4.06693	7.15924	12.866	15.4497	6.0683	14.1579	-1.26193	0.0279536	lypd6	GO:0003674 (molecular_function)	LY6/PLAUR domain containing 6 [Source:ZFIN;Acc:ZDB-GENE-040912-117]	chr9:24104418-24151695
ENSDART00000020673	687.636	61.7897	54.3072	10347.5	14346.5	267.911	12347	-6.52675	0.0279719	f3a	GO:0005515 (protein binding)	coagulation factor IIIa [Source:ZFIN;Acc:ZDB-GENE-071119-5]	chr24:31254109-31267455
ENSDART00000113436	607.155	1659.78	5123.76	15.9436	58.2789	2463.57	37.1113	5.82532	0.0279728	ssh2b	GO:0016787 (hydrolase activity)	slingshot homolog 2b (Drosophila) [Source:ZFIN;Acc:ZDB-GENE-081205-4]	chr21:39253498-39314828
ENSDART00000110791	11.0115	18.5045	11.137	34.0735	26.8634	13.551	30.4685	-1.20306	0.0279962	si:dkey-260c8.4	GO:0004674 (protein serine/threonine kinase activity)	mitogen-activated protein kinase kinase kinase 14 [Source:HGNC Symbol;Acc:HGNC:6853]	chr3:37702214-37737377
ENSDART00000125025	1061.68	1922.96	1424.19	3027.24	3991.56	1469.61	3509.4	-1.28421	0.0281248			ncrna:rRNA chromosome:Zv9:15:692778:692894:-1 gene:ENSDARG00000089048 gene_biotype:rRNA transcript_biotype:rRNA	chr15:692778-692894
ENSDART00000132740	9.29825	10.0006	6.43539	18.0511	24.1584	8.57808	21.1047	-1.30923	0.028178	ppp3cca	GO:0004721 (phosphoprotein phosphatase activity)	protein phosphatase 3, catalytic subunit, gamma isozyme, a [Source:ZFIN;Acc:ZDB-GENE-030829-36]	chr5:29568896-29639228
ENSDART00000016208	2112.75	5585.62	166.679	3.10913	2.7408	2621.68	2.92497	8.74556	0.0281824	chd7	GO:0005515 (protein binding)	chromodomain helicase DNA binding protein 7 [Source:ZFIN;Acc:ZDB-GENE-070912-179]	chr2:21562193-21617220
GENSCAN00000003889	422.143	315.508	41.5639	8948.91	5569.98	259.738	7259.45	-5.31868	0.0282009			cdna:genscan chromosome:Zv9:4:44236366:44237684:1 transcript_biotype:protein_coding	chr4:44236366-44237684
GENSCAN00000013139	8.5252	8.46814	5.00641	130.966	70.978	7.33325	100.972	-3.75866	0.0282443			cdna:genscan chromosome:Zv9:1:7653261:7671181:1 transcript_biotype:protein_coding	chr1:7653261-7671181
ENSDART00000074342	5873.62	9388.42	9521.29	8.15762	2.95947	8261.11	5.55855	10.6811	0.0283261	pdcd11	GO:0005515 (protein binding)	programmed cell death 11 [Source:ZFIN;Acc:ZDB-GENE-030131-4076]	chr1:49941416-49987572
ENSDART00000141566	10.2995	8.95532	6.56988	4.06738	4.3507	8.60823	4.20904	1.00836	0.0284031	col7a1l	GO:0005515 (protein binding)	collagen type VII alpha 1-like [Source:ZFIN;Acc:ZDB-GENE-030131-9861]	chr4:14954829-15005641
ENSDART00000113697	1260.29	10842.3	10913.6	19.2088	2.80556	7672.08	11.0072	9.4966	0.028426	eif4ea	GO:0003743 (translation initiation factor activity)	eukaryotic translation initiation factor 4ea [Source:ZFIN;Acc:ZDB-GENE-040413-1]	chr14:45820489-45829413
ENSDART00000120304	61.9468	229.293	188.586	846.264	1176.15	159.942	1011.21	-2.84471	0.0285096			ncrna:rRNA chromosome:Zv9:18:28461867:28461983:1 gene:ENSDARG00000084904 gene_biotype:rRNA transcript_biotype:rRNA	chr18:28461867-28461983
ENSDART00000119641	2496.61	1503.47	1379.27	4636.08	6792.63	1793.11	5714.35	-1.69772	0.0285258			ncrna:rRNA chromosome:Zv9:24:17103974:17104088:-1 gene:ENSDARG00000084241 gene_biotype:rRNA transcript_biotype:rRNA	chr24:17103974-17104088
ENSDART00000150079	113.101	155.277	392.474	909.192	1567.28	220.284	1238.24	-2.64904	0.0285347	tnni1b	GO:0005861 (troponin complex)	troponin I, skeletal, slow b [Source:ZFIN;Acc:ZDB-GENE-041212-37]	chr6:54780503-54799708
ENSDART00000097868	2.8771	2.76866	2.70277	1474.87	850.307	2.78284	1162.59	-8.65303	0.0285415	tgs1	GO:0016740 (transferase activity)	trimethylguanosine synthase homolog (S. cerevisiae) [Source:ZFIN;Acc:ZDB-GENE-070802-2]	chr2:27761944-27799950
ENSDART00000064709	22613.1	24955.7	21804.2	8617.84	10248.7	23124.3	9433.3	1.29662	0.0285682	txnrd1	GO:0015035 (protein disulfide oxidoreductase activity)	thioredoxin reductase 1 [Source:ZFIN;Acc:ZDB-GENE-030327-2]	chr6:1367461-1393833
ENSDART00000154949	36.0009	36.9496	22.8329	15.1485	11.4703	31.9278	13.3094	1.24303	0.0286376			havana:lincRNA chromosome:Zv9:16:28851784:28852217:-1 gene:ENSDARG00000097773 gene_biotype:lincRNA transcript_biotype:lincRNA	chr16:28851784-28852217
ENSDART00000114238	1282.45	1039.62	1587.23	3125.93	4281.6	1303.1	3703.77	-1.51073	0.0286391	f2	GO:0008236 (serine-type peptidase activity)	coagulation factor II (thrombin) [Source:ZFIN;Acc:ZDB-GENE-030131-4606]	chr7:40142973-40152260
ENSDART00000091468	3087.96	5684.67	392.182	23.3145	36.535	3054.94	29.9248	6.02638	0.0286491	furina	GO:0004252 (serine-type endopeptidase activity)	furin (paired basic amino acid cleaving enzyme) a [Source:ZFIN;Acc:ZDB-GENE-040901-1]	chr7:14869291-15084713
ENSDART00000150527	4320.04	4253.41	4505.26	9342.43	10447	4359.57	9894.73	-1.18065	0.0286505	si:ch73-289h5.5		si:ch73-289h5.5 [Source:ZFIN;Acc:ZDB-GENE-110914-179]	chr4:27752697-27808500
ENSDART00000151457	8.22978	28.9952	37.8479	592.167	1956.25	25.0243	1274.21	-5.69162	0.0286559	zgc:162824	GO:0004713 (protein tyrosine kinase activity)	si:dkey-84o3.9 [Source:ZFIN;Acc:ZDB-GENE-120214-16]	chr21:4582569-4585761
ENSDART00000139765	7343.41	1133.55	8851.81	228.302	135.158	5776.26	181.73	4.57689	0.028673	elovl1b	GO:0016021 (integral component of membrane)	elongation of very long chain fatty acids (FEN1/Elo2, SUR4/Elo3, yeast)-like 1b [Source:ZFIN;Acc:ZDB-GENE-040426-2755]	chr11:13280627-13337829
ENSDART00000052461	32.2825	16.7531	16.1161	59.1064	88.94	21.7172	74.0232	-1.81684	0.0287484	si:ch211-196n4.3	GO:0016740 (transferase activity)	si:ch211-196n4.3 [Source:ZFIN;Acc:ZDB-GENE-060503-676]	chr19:24232087-24233939
ENSDART00000075859	10.2663	16.6121	15.918	31.297	33.1331	14.2655	32.2151	-1.20688	0.0288145	zgc:172065	GO:0005525 (GTP binding)	zgc:172065 [Source:ZFIN;Acc:ZDB-GENE-080214-2]	chr7:2852198-2858870
ENSDART00000132288	36.9168	46.785	36.5446	295.661	208.138	40.0822	251.899	-2.63934	0.0288212			havana:processed_transcript chromosome:Zv9:10:32275585:32307088:-1 gene:ENSDARG00000092847 gene_biotype:processed_transcript transcript_biotype:processed_transcript	chr10:32275585-32307088
ENSDART00000132878	50.2515	24.257	31.2168	97.9848	108.78	35.2418	103.382	-1.61798	0.0288308	epb41l5	GO:0005856 (cytoskeleton)	erythrocyte membrane protein band 4.1 like 5 [Source:ZFIN;Acc:ZDB-GENE-030616-450]	chr9:29904006-29972489
ENSDART00000154963	11526.9	8201.53	8610.23	91.9848	46.3131	9446.21	69.149	7.1604	0.028902	srsf3a	GO:0003676 (nucleic acid binding)	serine/arginine-rich splicing factor 3a [Source:ZFIN;Acc:ZDB-GENE-030616-631]	chr6:41010867-41022102
ENSDART00000035188	3.91724	4.99914	2.95315	13.4126	9.5157	3.95651	11.4642	-1.54666	0.028906	kcnip1b	GO:0005509 (calcium ion binding)	Kv channel interacting protein 1 b [Source:ZFIN;Acc:ZDB-GENE-041212-57]	chr10:22203960-22232131
ENSDART00000150096	48.2991	87.1077	57.9453	3097.03	1510.05	64.4507	2303.54	-5.11343	0.0289393	gdnfa	GO:0008083 (growth factor activity)	glial cell derived neurotrophic factor a [Source:ZFIN;Acc:ZDB-GENE-010226-1]	chr10:1438638-1455859
ENSDART00000045752	144.652	205.611	122.036	366.491	512.566	157.433	439.529	-1.49582	0.0289935	tbc1d20	GO:0005097 (Rab GTPase activator activity)	TBC1 domain family, member 20 [Source:ZFIN;Acc:ZDB-GENE-050626-61]	chr22:10239938-10251619
GENSCAN00000000928	29271	2087.94	47949.6	67.9807	54.6792	26436.2	61.3299	7.87477	0.029047			cdna:genscan chromosome:Zv9:3:6749000:6807963:-1 transcript_biotype:protein_coding	chr3:6749000-6807963
ENSDART00000061164	32.1999	14.8273	16.974	54.6626	69.0014	21.3337	61.832	-1.61238	0.0291274	sntb1	GO:0005515 (protein binding)	syntrophin, basic 1 [Source:ZFIN;Acc:ZDB-GENE-040704-13]	chr16:17459976-17558409
ENSDART00000145506	27006.5	28810.2	15136.4	2249.12	4009.81	23651	3129.47	2.92145	0.0292007			cdna:known chromosome:Zv9:13:18361084:18372496:1 gene:ENSDARG00000012274 gene_biotype:protein_coding transcript_biotype:processed_transcript	chr13:18361084-18372496
ENSDART00000135168	299.556	237.917	499.326	104.254	122.076	345.6	113.165	1.54382	0.0292094	si:dkey-78l4.10	GO:0004252 (serine-type endopeptidase activity)		chr22:19813325-19814836
ENSDART00000062925	4.11033	7.78124	3.55324	2035.4	706.897	5.14827	1371.15	-7.9521	0.0292149	slc25a27	GO:0016020 (membrane)	solute carrier family 25, member 27 [Source:ZFIN;Acc:ZDB-GENE-040426-1290]	chr20:36826412-36833667
ENSDART00000019748	2116.85	2301.37	4111.31	7961.77	6494.84	2843.17	7228.3	-1.40486	0.0292383	lin7a	GO:0005515 (protein binding)	lin-7 homolog A (C. elegans) [Source:ZFIN;Acc:ZDB-GENE-040426-1665]	chr4:20687452-20787163
ENSDART00000138493	4886.6	5437.22	3161.64	8586.87	10655.8	4495.15	9621.32	-1.12706	0.0292795			cdna:known chromosome:Zv9:2:51656750:51659836:1 gene:ENSDARG00000041524 gene_biotype:protein_coding transcript_biotype:processed_transcript	chr2:51656750-51659836
ENSDART00000121783	12.4761	33.7445	30.6601	776.926	321.168	25.6269	549.047	-4.41242	0.0293014	rfc1		replication factor C (activator 1) 1 [Source:ZFIN;Acc:ZDB-GENE-070410-99]	chr1:22017139-22042663
ENSDART00000049469	5.90856	8.19612	4.96045	2.67612	2.72893	6.35504	2.70253	1.20183	0.0293604	jak3	GO:0005515 (protein binding)	Janus kinase 3 (a protein tyrosine kinase, leukocyte) [Source:ZFIN;Acc:ZDB-GENE-070725-4]	chr8:13906063-13929548
GENSCAN00000005136	1196.28	458.111	161.602	11950.3	10482.9	605.33	11216.6	-4.65019	0.0293654			cdna:genscan chromosome:Zv9:4:46637074:46638275:1 transcript_biotype:protein_coding	chr4:46637074-46638275
GENSCAN00000020022	20.8716	5.61487	10.0088	2811.01	11599	12.1651	7205	-9.08065	0.0293778			cdna:genscan chromosome:Zv9:11:40642913:40667553:1 transcript_biotype:protein_coding	chr11:40642913-40667553
GENSCAN00000014317	7707.31	543.196	9324.62	22.9989	18.5595	5858.38	20.7792	7.35927	0.0294583			cdna:genscan chromosome:Zv9:1:6396613:6445098:1 transcript_biotype:protein_coding	chr1:6396613-6445098
ENSDART00000125691	29.7129	24.4527	21.6776	46.4839	58.3585	25.2811	52.4212	-1.05507	0.0294716	sntb1	GO:0005515 (protein binding)	syntrophin, basic 1 [Source:ZFIN;Acc:ZDB-GENE-040704-13]	chr16:17459976-17558409
ENSDART00000148755	315.818	169.567	714.527	39.6723	59.1465	399.97	49.4094	2.79836	0.0294766	si:ch211-154o6.3	GO:0005515 (protein binding)	si:ch211-154o6.3 [Source:ZFIN;Acc:ZDB-GENE-030131-1030]	chr16:23745585-23773662
ENSDART00000027398	6.4786	8.103	6.75396	3.39458	2.72506	7.11186	3.05982	1.21853	0.0295072		GO:0005515 (protein binding)	potassium voltage-gated channel, shaker-related subfamily, member 2 [Source:HGNC Symbol;Acc:HGNC:6220]	chr6:49358025-49359589
GENSCAN00000023490	1638.02	3174.3	4079.3	8454.91	11237.2	2963.87	9846.06	-1.8161	0.0295203			cdna:genscan chromosome:Zv9:18:65818:66246:1 transcript_biotype:protein_coding	chr18:65818-66246
ENSDART00000149420	12518.1	904.319	4071.62	47.3997	47.0606	5831.35	47.2302	6.24631	0.0295465			cdna:known chromosome:Zv9:1:27013575:27018015:1 gene:ENSDARG00000031632 gene_biotype:protein_coding transcript_biotype:retained_intron	chr1:27013575-27018015
ENSDART00000140050	13.9889	394.685	61.2456	10529.8	5049.78	156.64	7789.8	-6.70967	0.0295533	ctnna1	GO:0005198 (structural molecule activity)	catenin (cadherin-associated protein), alpha 1 [Source:ZFIN;Acc:ZDB-GENE-991207-24]	chr24:35832742-36171912
ENSDART00000131387	22795.8	1779.71	4046.09	75.8267	79.2537	9540.53	77.5402	6.14222	0.0296839	cebpg	GO:0043565 (sequence-specific DNA binding)	CCAAT/enhancer binding protein (C/EBP), gamma [Source:ZFIN;Acc:ZDB-GENE-020111-5]	chr7:39481773-39487287
ENSDART00000010081	3591.36	2885.14	7130.65	21473.9	13676.9	4535.72	17575.4	-2.03002	0.0297027	etfb	GO:0009055 (electron carrier activity)	electron-transfer-flavoprotein, beta polypeptide [Source:ZFIN;Acc:ZDB-GENE-040426-1931]	chr16:53740847-53755293
ENSDART00000076172	13.218	25.6035	27.0043	6.93736	4.4803	21.942	5.70883	1.90695	0.0297171			Uncharacterized protein [Source:UniProtKB/TrEMBL;Acc:E7F413]	chr7:30849458-30851937
ENSDART00000151761	14.2391	31.9446	43.9462	904.474	2618.05	30.0433	1761.26	-5.82529	0.0297199	si:dkey-19p15.5	GO:0004713 (protein tyrosine kinase activity)	si:dkey-84o3.15 [Source:ZFIN;Acc:ZDB-GENE-120214-14]	chr21:4703773-4706966
ENSDART00000052645	13427.1	12567.7	1735.84	7.19233	42.789	9243.53	24.9907	8.56442	0.0297376	tsr1	GO:0005634 (nucleus)	TSR1, 20S rRNA accumulation, homolog (yeast) [Source:ZFIN;Acc:ZDB-GENE-030131-3762]	chr15:24970133-24991138
ENSDART00000141617	897.138	3295.09	434.947	43.8392	58.5578	1542.39	51.1985	4.42369	0.0297407			cdna:known chromosome:Zv9:2:4269037:4271641:1 gene:ENSDARG00000013847 gene_biotype:protein_coding transcript_biotype:retained_intron	chr2:4269037-4271641
ENSDART00000131848	11.809	21.4508	8.82283	3.80964	3.26156	14.0275	3.5356	1.89106	0.0297836			havana:processed_transcript chromosome:Zv9:8:21384654:21388369:-1 gene:ENSDARG00000093753 gene_biotype:processed_transcript transcript_biotype:processed_transcript	chr8:21384654-21388369
ENSDART00000077125	464.583	6646.52	1503.07	24.9938	21.4212	2871.39	23.2075	6.17172	0.0298453	aplp2	GO:0008201 (heparin binding)	amyloid beta (A4) precursor-like protein 2 [Source:ZFIN;Acc:ZDB-GENE-061009-28]	chr18:42781185-42943595
ENSDART00000054237	276.671	11823.4	3692.1	6.34324	12.1627	5264.06	9.25299	8.02906	0.0299029	ptges3a		prostaglandin E synthase 3a (cytosolic) [Source:ZFIN;Acc:ZDB-GENE-040426-2200]	chr23:27292556-27300635
ENSDART00000157145	29.4921	23.7661	58.5792	8.58439	11.3391	37.2791	9.96174	1.80599	0.0299594	si:ch211-237d5.6	GO:0004713 (protein tyrosine kinase activity)	kinase suppressor of ras 1 [Source:HGNC Symbol;Acc:HGNC:6465]	chr15:30368155-30444853
ENSDART00000073500	766.055	1061.52	666.799	2964.78	2094.96	831.457	2529.87	-1.61177	0.0299749	ptprz1a	GO:0005515 (protein binding)	protein tyrosine phosphatase, receptor-type, Z polypeptide 1a [Source:ZFIN;Acc:ZDB-GENE-090406-1]	chr25:29206875-29310311
ENSDART00000131678	29.6399	22.4336	17.8693	156.35	99.1265	23.3142	127.738	-2.44776	0.0300085	si:ch211-215m21.23	GO:0016773 (phosphotransferase activity, alcohol group as acceptor)	si:ch211-215m21.23 [Source:ZFIN;Acc:ZDB-GENE-090506-3]	chr20:42814734-42816205
ENSDART00000123275	1406.62	7698.64	1807.34	6.66381	30.1737	3637.54	18.4187	7.57024	0.0300098	ptbp2a	GO:0000166 (nucleotide binding)	polypyrimidine tract binding protein 2a [Source:ZFIN;Acc:ZDB-GENE-050320-141]	chr24:31678855-31705272
ENSDART00000156424	134.013	2359.85	214.504	2.67039	2.80913	902.789	2.73976	7.21827	0.0300109	cpda	GO:0004181 (metallocarboxypeptidase activity)	carboxypeptidase D, a [Source:ZFIN;Acc:ZDB-GENE-081112-2]	chr15:24110408-24148158
ENSDART00000143340	635.499	4095.79	8889.29	33.8092	36.6961	4540.19	35.2526	6.33806	0.0300296	cbx5	GO:0005634 (nucleus)	chromobox homolog 5 (HP1 alpha homolog, Drosophila) [Source:ZFIN;Acc:ZDB-GENE-030131-5553]	chr23:36348765-36357900
ENSDART00000134496	12260.9	4650.95	7515.55	1325.84	683.329	8142.46	1004.58	2.98569	0.0300529			havana:processed_transcript chromosome:Zv9:20:52087354:52088025:-1 gene:ENSDARG00000094846 gene_biotype:processed_transcript transcript_biotype:processed_transcript	chr20:52087354-52088025
ENSDART00000077055	21.7484	51.6512	25.7417	753.186	343.474	33.0471	548.33	-4.05059	0.0300686	rfc1		replication factor C (activator 1) 1 [Source:ZFIN;Acc:ZDB-GENE-070410-99]	chr1:22017139-22042663
ENSDART00000135170	4861.31	5081.67	8342.2	14353.3	12479.4	6095.06	13416.3	-1.18003	0.0301065			havana:processed_transcript chromosome:Zv9:3:3187857:3189952:-1 gene:ENSDARG00000092212 gene_biotype:processed_transcript transcript_biotype:retained_intron	chr3:3187857-3189952
ENSDART00000120292	1437.49	676.626	867.75	2323.79	3181.48	993.956	2752.64	-1.52464	0.0301239			ncrna:rRNA chromosome:Zv9:4:6750295:6750411:-1 gene:ENSDARG00000084892 gene_biotype:rRNA transcript_biotype:rRNA	chr4:6750295-6750411
ENSDART00000143265	11.6366	15.4132	12.2788	23.9644	29.9258	13.1095	26.9451	-1.04147	0.0301314	hydin		HYDIN, axonemal central pair apparatus protein [Source:ZFIN;Acc:ZDB-GENE-050419-219]	chr18:21054460-21182112
ENSDART00000080771	2.64071	2.69961	2.72841	9608.74	4571.84	2.68958	7090.29	-11.2671	0.0301449	si:dkey-29b22.6	GO:0015293 (symporter activity)	solute carrier family 6, member 16 [Source:HGNC Symbol;Acc:HGNC:13622]	chr3:16186342-16215766
ENSDART00000140969	576.32	115.02	82.6272	5751.16	2214.86	257.989	3983.01	-4.33965	0.0301508	dennd2da	GO:0003674 (molecular_function)	DENN/MADD domain containing 2Da [Source:ZFIN;Acc:ZDB-GENE-061013-542]	chr8:13506323-13546248
ENSDART00000126228	39815.8	3533.79	1442.84	101.472	23.6161	14930.8	62.5439	6.9076	0.0301541	tinagl1	GO:0030247 (polysaccharide binding)	tubulointerstitial nephritis antigen-like 1 [Source:ZFIN;Acc:ZDB-GENE-060503-240]	chr19:43304948-43370810
ENSDART00000086211	1960.33	3449.01	2330.27	4912.46	6165.22	2579.87	5538.84	-1.13437	0.0301733	pcgf5b	GO:0005515 (protein binding)	polycomb group ring finger 5b [Source:ZFIN;Acc:ZDB-GENE-060512-34]	chr12:17477078-17506630
ENSDART00000127121	2164.78	1125.68	1711.1	4392.73	3457.3	1667.19	3925.02	-1.27574	0.0301894		GO:0005515 (protein binding)	Uncharacterized protein [Source:UniProtKB/TrEMBL;Acc:H9GYF8]	chrZv9_scaffold3519:120724-139063
ENSDART00000121103	436.82	445.465	302.165	1727.01	1193.25	394.817	1460.13	-1.88428	0.0302018			ncrna:rRNA chromosome:Zv9:7:29914733:29914849:-1 gene:ENSDARG00000085703 gene_biotype:rRNA transcript_biotype:rRNA	chr7:29914733-29914849
ENSDART00000098342	7.56504	5.79678	192.476	2052.09	10823.5	68.6127	6437.8	-7.85467	0.0302119	si:dkey-173l11.5	GO:0005509 (calcium ion binding)	si:dkey-173l11.5 [Source:ZFIN;Acc:ZDB-GENE-110406-4]	chr7:56093081-56108484
ENSDART00000075782	8855.54	260.701	6198.92	5.21255	25.7573	5105.05	15.4849	7.71102	0.0302411	slc7a10a	GO:0015171 (amino acid transmembrane transporter activity)	solute carrier family 7 (neutral amino acid transporter light chain, asc system), member 10a [Source:ZFIN;Acc:ZDB-GENE-080116-1]	chr7:39707751-39732776
ENSDART00000082304	77776.1	81151.1	70280.5	31256.7	37119.8	76402.6	34188.2	1.16284	0.0302484	si:ch1073-460d17.3	GO:0005515 (protein binding)		chr2:877586-888494
ENSDART00000127961	6.25582	21.0487	189.266	1941.05	9457.15	72.1901	5699.1	-7.19653	0.0302845			DENN/MADD domain containing 6A [Source:HGNC Symbol;Acc:HGNC:26635]	chrZv9_NA930:1266-20338
ENSDART00000133309	291.192	17335.5	10449.3	10.6161	4.59701	9358.64	7.60657	9.06835	0.0304034	si:ch211-133l5.4		si:ch211-133l5.4 [Source:ZFIN;Acc:ZDB-GENE-081104-114]	chr8:21364005-21394503
ENSDART00000100650	14.3233	7.51531	8.42128	23.7068	27.1398	10.0866	25.4233	-1.39006	0.0304116	matn3b		matrilin 3b [Source:ZFIN;Acc:ZDB-GENE-050221-9]	chr13:32851046-32859487
ENSDART00000009777	527.651	1592.03	299.574	10873.5	4971.74	806.417	7922.62	-3.54175	0.0304184		GO:0005230 (extracellular ligand-gated ion channel activity)	glycine receptor, alpha 3 [Source:HGNC Symbol;Acc:HGNC:4328]	chr1:38827489-38873612
ENSDART00000100281	1535.85	135.469	233.243	15846.5	20591.7	634.856	18219.1	-5.63005	0.0305513	aldh9a1a.2	GO:0016620 (oxidoreductase activity, acting on the aldehyde or oxo group of donors, NAD or NADP as acceptor)	aldehyde dehydrogenase 9 family, member A1a, tandem duplicate 2 [Source:ZFIN;Acc:ZDB-GENE-081104-507]	chr8:21620379-21629979
ENSDART00000059667	12281.4	1065.99	1270.18	32.1606	39.3578	4872.53	35.7592	6.16476	0.0305835	wdr75	GO:0005515 (protein binding)	WD repeat domain 75 [Source:ZFIN;Acc:ZDB-GENE-030616-5]	chr9:42193201-42230015
ENSDART00000142808	8274.44	14739.6	634.572	23.4994	19.287	7882.88	21.3932	7.64511	0.0306036			cdna:known chromosome:Zv9:16:13993590:13996131:1 gene:ENSDARG00000040988 gene_biotype:protein_coding transcript_biotype:retained_intron	chr16:13993590-13996131
ENSDART00000128420	2033.59	1098.26	1644.72	4267.65	3239.83	1592.19	3753.74	-1.26898	0.0307947	zgc:110171	GO:0005515 (protein binding)	zgc:110171 [Source:ZFIN;Acc:ZDB-GENE-050417-391]	chr4:61591041-61615473
ENSDART00000153570	73.6773	71.8375	48.6501	31.3931	30.2738	64.7216	30.8334	1.04521	0.0307997			havana:lincRNA chromosome:Zv9:8:46196731:46202313:1 gene:ENSDARG00000097262 gene_biotype:lincRNA transcript_biotype:lincRNA	chr8:46196731-46202313
GENSCAN00000003124	5537.41	5606.56	5658.47	16606.7	14917.5	5600.81	15762.1	-1.49074	0.0308276			cdna:genscan chromosome:Zv9:2:10726444:10818711:-1 transcript_biotype:protein_coding	chr2:10726444-10818711
ENSDART00000125871	2210.2	1108.78	1634.45	4536.19	3502.61	1651.14	4019.4	-1.32764	0.0309029	si:dkey-16p6.1	GO:0005515 (protein binding)	si:dkey-16p6.1 [Source:ZFIN;Acc:ZDB-GENE-081103-43]	chr12:3113481-3130981
GENSCAN00000031328	779.971	11691	10098.9	63.5845	41.6167	7523.29	52.6006	6.45592	0.0309129			cdna:genscan chromosome:Zv9:5:3518613:3561345:1 transcript_biotype:protein_coding	chr5:3518613-3561345
ENSDART00000139730	964.143	59.6949	149.907	4.31138	2.7604	391.248	3.53589	5.89368	0.0309852	impdh1b		inosine 5'-phosphate dehydrogenase 1b [Source:ZFIN;Acc:ZDB-GENE-030219-206]	chr4:18029098-18053665
ENSDART00000024948	5874.46	17587.7	4351.75	519.384	185.142	9271.3	352.263	4.62672	0.0310435	b3gnt5a	GO:0047256 (lactosylceramide 1,3-N-acetyl-beta-D-glucosaminyltransferase activity)	UDP-GlcNAc:betaGal beta-1,3-N-acetylglucosaminyltransferase 5a [Source:ZFIN;Acc:ZDB-GENE-030131-8470]	chr11:10605252-10614375
ENSDART00000131314	33.7445	15.3617	22.1889	59.2212	86.2647	23.765	72.7429	-1.66283	0.0310915	si:ch211-196n4.3	GO:0004713 (protein tyrosine kinase activity)	si:ch211-196n4.3 [Source:ZFIN;Acc:ZDB-GENE-060503-676]	chr19:24232087-24233939
ENSDART00000137636	37.2299	45.2284	22.1581	94.2925	143.683	34.8721	118.988	-1.80047	0.031111	si:dkey-174l22.2	GO:0046872 (metal ion binding)	kinase suppressor of ras 1 [Source:HGNC Symbol;Acc:HGNC:6465]	chr10:38506256-38590216
ENSDART00000157228	706.897	297.974	289.986	1694.33	3063.61	431.619	2378.97	-2.53235	0.0311513			havana:lincRNA chromosome:Zv9:17:31155436:31156651:-1 gene:ENSDARG00000097833 gene_biotype:lincRNA transcript_biotype:lincRNA	chr17:31155436-31156651
ENSDART00000152315	196.786	425.588	180.541	724.121	1008.22	267.638	866.171	-1.78885	0.0311679	akap8l	GO:0016740 (transferase activity)	A kinase (PRKA) anchor protein 8-like [Source:ZFIN;Acc:ZDB-GENE-040426-2303]	chr1:60320186-60332019
ENSDART00000122924	2836.18	2927.23	1811.37	5807.3	4616.97	2524.93	5212.13	-1.06888	0.0311997			periphilin 1 [Source:HGNC Symbol;Acc:HGNC:19369]	chr8:55736874-55742089
ENSDART00000141816	19922.4	850.307	1628.66	66.933	22.8742	7467.13	44.9036	6.27099	0.0312111			cdna:pseudogene chromosome:Zv9:8:17085237:17085879:-1 gene:ENSDARG00000092408 gene_biotype:unprocessed_pseudogene transcript_biotype:unprocessed_pseudogene	chr8:17085237-17085879
ENSDART00000051699	2151.22	1464.88	1033.33	4182.76	4595.18	1549.81	4388.97	-1.56455	0.0312319	sat1a.1	GO:0004145 (diamine N-acetyltransferase activity)	spermidine/spermine N1-acetyltransferase 1a, duplicate 1 [Source:ZFIN;Acc:ZDB-GENE-050913-41]	chr5:4339516-4350162
ENSDART00000103390	4.7923	9.29721	4.87226	82.0323	42.7968	6.32059	62.4146	-3.30141	0.0312354	im:6909388	GO:0003674 (molecular_function)	radial spoke head 1 homolog (Chlamydomonas) [Source:HGNC Symbol;Acc:HGNC:12371]	chr9:17127997-17289317
ENSDART00000138136	14.3871	21.4771	3.77733	337.073	1253.42	13.2138	795.246	-5.94802	0.0312738	chst2a	GO:0008146 (sulfotransferase activity)	carbohydrate (N-acetylglucosamine-6-O) sulfotransferase 2a [Source:ZFIN;Acc:ZDB-GENE-060929-40]	chr2:7896790-7899153
ENSDART00000059352	2406.98	8594.23	4535.26	4.35347	17.9815	5178.83	11.1675	9.00441	0.031316	exosc5	GO:0005575 (cellular_component)	exosome component 5 [Source:ZFIN;Acc:ZDB-GENE-060503-675]	chr18:34400131-34405923
ENSDART00000081156	7989.51	22842.4	17001.5	15.1964	3.54895	15944.4	9.37268	10.9557	0.0313272	timm13	GO:0046872 (metal ion binding)	translocase of inner mitochondrial membrane 13 homolog (yeast) [Source:ZFIN;Acc:ZDB-GENE-040718-167]	chr22:10881265-10884885
ENSDART00000125250	2979.15	2280.21	115.453	3.91527	3.01637	1791.6	3.46582	8.06797	0.0313438	si:ch211-214b16.3	GO:0005515 (protein binding)	si:ch211-214b16.3 [Source:ZFIN;Acc:ZDB-GENE-081105-50]	chr3:60924153-60948286
ENSDART00000155789	315.322	293.325	189.546	492.92	623.456	266.065	558.188	-1.09353	0.0313606			havana:lincRNA chromosome:Zv9:21:10761892:10765910:1 gene:ENSDARG00000098039 gene_biotype:lincRNA transcript_biotype:lincRNA	chr21:10761892-10765910
ENSDART00000149444	7.08732	6.41784	202.59	2008.72	10666.3	72.0318	6337.53	-7.7865	0.031404	si:dkey-173l11.5	GO:0005509 (calcium ion binding)	si:dkey-173l11.5 [Source:ZFIN;Acc:ZDB-GENE-110406-4]	chr7:56093081-56108484
ENSDART00000135948	1287.69	2890.87	1485.08	7863.78	5147.34	1887.88	6505.56	-1.84725	0.0314553			havana:processed_transcript chromosome:Zv9:9:24398291:24399123:1 gene:ENSDARG00000094734 gene_biotype:processed_transcript transcript_biotype:retained_intron	chr9:24398291-24399123
GENSCAN00000017906	665.122	512.963	10191.7	29.842	12.5348	3789.94	21.1884	6.29153	0.0314597			cdna:genscan chromosome:Zv9:7:22188645:22216157:1 transcript_biotype:protein_coding	chr7:22188645-22216157
ENSDART00000130821	95.5423	175.884	375.793	894.122	1570.54	215.74	1232.33	-2.68057	0.031516	tnni1b	GO:0003674 (molecular_function)	troponin I, skeletal, slow b [Source:ZFIN;Acc:ZDB-GENE-041212-37]	chr6:54780503-54799708
ENSDART00000036901	7070.07	1942.42	1393.7	13.943	2.77712	3468.73	8.36005	8.74776	0.0315502	fbxw11a	GO:0005515 (protein binding)	F-box and WD-40 domain protein 11a [Source:ZFIN;Acc:ZDB-GENE-030131-6305]	chr14:2127697-2166885
ENSDART00000151925	2.72276	2.79413	123.674	1733.6	5602.37	43.0637	3667.98	-8.31306	0.031556	si:dkey-225n22.4		si:dkey-225n22.4 [Source:ZFIN;Acc:ZDB-GENE-120709-30]	chr24:541586-587807
ENSDART00000140120	2.72324	2.77043	3.02911	6025.82	13796.1	2.84093	9910.97	-11.6497	0.0315941			cdna:known chromosome:Zv9:21:39003773:39011028:-1 gene:ENSDARG00000054609 gene_biotype:protein_coding transcript_biotype:retained_intron	chr21:39003773-39011028
ENSDART00000135223	13.2153	8.4601	23.9592	4.23638	2.82071	15.2116	3.52854	2.00633	0.031601			cdna:known chromosome:Zv9:3:19177831:19182475:1 gene:ENSDARG00000093622 gene_biotype:protein_coding transcript_biotype:retained_intron	chr3:19177831-19182475
ENSDART00000082352	21.1179	13.4763	8.39879	4.34631	2.79168	14.331	3.56899	1.94051	0.0316172		GO:0005515 (protein binding)	kelch repeat and BTB (POZ) domain containing 11 [Source:HGNC Symbol;Acc:HGNC:29104]	chr17:27193300-27194878
ENSDART00000108889	35.2998	62.7899	49.7063	24.2886	18.7872	49.2653	21.5379	1.1662	0.0316336			OAF homolog (Drosophila) [Source:HGNC Symbol;Acc:HGNC:28752]	chr5:59988936-59999689
ENSDART00000051818	525.878	13290.7	15729.3	11.4866	15.461	9848.64	13.4738	8.48974	0.0316365	utp6	GO:0005622 (intracellular)	UTP6, small subunit (SSU) processome component, homolog (yeast) [Source:ZFIN;Acc:ZDB-GENE-040426-769]	chr6:19378632-19385948
ENSDART00000137800	2177.7	1114.69	1707.63	4278.97	3591.99	1666.67	3935.48	-1.28721	0.0316452	si:dkey-238o14.1	GO:0005515 (protein binding)	si:dkey-238o14.1 [Source:ZFIN;Acc:ZDB-GENE-081103-10]	chr4:37554727-37569224
ENSDART00000018651	6639.8	16906.5	6259.73	97.7597	29.3143	9935.33	63.537	7.37568	0.0316694	g3bp1	GO:0003676 (nucleic acid binding)	GTPase activating protein (SH3 domain) binding protein 1 [Source:ZFIN;Acc:ZDB-GENE-030131-7452]	chr14:26932926-26944720
ENSDART00000146665	2397.18	1423.78	1757.72	5026.91	3739.75	1859.56	4383.33	-1.25471	0.0316962	si:dkey-26m3.3	GO:0005515 (protein binding)	si:dkey-26m3.3 [Source:ZFIN;Acc:ZDB-GENE-070705-445]	chr8:40920467-40935004
ENSDART00000109302	9.85516	10.5385	167.684	6807.34	1393.12	62.6925	4100.23	-6.89246	0.0317394			Uncharacterized protein [Source:UniProtKB/TrEMBL;Acc:E7F233]	chr16:9489047-9552011
ENSDART00000057962	7.81508	14.3594	21.0232	2.73077	2.84531	14.3992	2.78804	2.25575	0.0317769	fank1	GO:0005515 (protein binding)	fibronectin type III and ankyrin repeat domains 1 [Source:ZFIN;Acc:ZDB-GENE-130613-3]	chr12:45858726-45876322
ENSDART00000126971	7042.5	5188.37	2735.64	1089.12	1015.63	4988.84	1052.38	2.14165	0.031796	slain2		SLAIN motif family, member 2 [Source:ZFIN;Acc:ZDB-GENE-041014-251]	chr20:23433754-23459832
ENSDART00000017368	18333.2	8696.27	20377.5	5037.27	3366.48	15802.3	4201.87	1.84662	0.0318168	si:dkey-77f5.10	GO:0016021 (integral component of membrane)	si:dkey-77f5.10 [Source:ZFIN;Acc:ZDB-GENE-131121-133]	chr15:933554-940667
ENSDART00000149108	5.64559	10.6725	5.00212	685.074	269.748	7.10675	477.411	-6.00263	0.0318179	si:ch211-191d2.2	GO:0046872 (metal ion binding)	zinc finger protein 507 [Source:HGNC Symbol;Acc:HGNC:23783]	chr20:23645373-23653272
ENSDART00000113174	19.9524	21.6799	132.823	483.873	1279.16	58.1518	881.517	-4.34969	0.03189	crygm2d7		crystallin, gamma M2d7 [Source:ZFIN;Acc:ZDB-GENE-060918-5]	chr9:23304401-23305526
ENSDART00000040926	26151.5	22660.4	26678.6	8752.59	6935.31	25163.5	7843.95	1.68768	0.0319356	eif4ebp2	GO:0008190 (eukaryotic initiation factor 4E binding)	eukaryotic translation initiation factor 4E binding protein 2 [Source:ZFIN;Acc:ZDB-GENE-031118-83]	chr13:30387117-30392499
ENSDART00000134989	13503.3	1349.54	18554.4	77.5938	76.5808	11135.8	77.0873	6.49786	0.0320042			cdna:novel chromosome:Zv9:1:6408450:6426403:1 gene:ENSDARG00000074050 gene_biotype:protein_coding transcript_biotype:processed_transcript	chr1:6408450-6426403
ENSDART00000140885	17.4401	4.76639	2.92342	793.492	207.551	8.37665	500.521	-6.02307	0.0320467	v2rh1	GO:0004930 (G-protein coupled receptor activity)	vomeronasal 2 receptor, h1 [Source:ZFIN;Acc:ZDB-GENE-050419-131]	chr18:31718810-31722159
ENSDART00000157031	20982.5	1629.06	862.111	15.3676	15.0048	7824.55	15.1862	7.66823	0.0320497	si:ch211-162e15.3		si:ch211-162e15.3 [Source:ZFIN;Acc:ZDB-GENE-131121-530]	chr2:4783623-4787041
ENSDART00000120474	1094.83	559.104	641.846	2247.96	2198.87	765.261	2223.42	-1.60196	0.0320925			ncrna:rRNA chromosome:Zv9:4:2452926:2453041:1 gene:ENSDARG00000085074 gene_biotype:rRNA transcript_biotype:rRNA	chr4:2452926-2453041
ENSDART00000128814	2.86134	37.2429	5.19273	545.86	564.37	15.099	555.115	-6.07908	0.0321828		GO:0008270 (zinc ion binding)	Uncharacterized protein [Source:UniProtKB/TrEMBL;Acc:E7EZ07]	chr11:40443274-40445236
GENSCAN00000014554	27.524	560.643	55.5904	8966.63	4318.53	214.586	6642.58	-6.03323	0.0322408			cdna:genscan chromosome:Zv9:7:61292637:61325528:-1 transcript_biotype:protein_coding	chr7:61292637-61325528
ENSDART00000132719	3430.14	8202.82	3617.08	1117.04	1349.54	5083.35	1233.29	1.92699	0.032267			havana:processed_transcript chromosome:Zv9:9:34280674:34284314:-1 gene:ENSDARG00000094401 gene_biotype:processed_transcript transcript_biotype:processed_transcript	chr9:34280674-34284314
ENSDART00000111712	10.258	22.1312	3.81673	338.173	1285.21	12.0686	811.693	-6.1117	0.0322699	chst2a	GO:0008146 (sulfotransferase activity)	carbohydrate (N-acetylglucosamine-6-O) sulfotransferase 2a [Source:ZFIN;Acc:ZDB-GENE-060929-40]	chr2:7896790-7899153
GENSCAN00000017632	8663.22	7237.35	12652.9	21744.6	19940.5	9517.81	20842.6	-1.16952	0.0322756			cdna:genscan chromosome:Zv9:4:34988202:34988910:-1 transcript_biotype:protein_coding	chr4:34988202-34988910
ENSDART00000021095	753.335	648.58	5039.95	38.105	45.2316	2147.29	41.6683	5.02358	0.032291	tfr1b	GO:0008233 (peptidase activity)	transferrin receptor 1b [Source:ZFIN;Acc:ZDB-GENE-041220-2]	chr24:26431769-26445940
ENSDART00000114731	127.76	71.8285	50.5168	335.729	317.46	83.3683	326.594	-2.07664	0.0323753	inpp4aa	GO:0005515 (protein binding)	inositol polyphosphate-4-phosphatase, type Ia [Source:ZFIN;Acc:ZDB-GENE-060312-5]	chr9:7039613-7109774
ENSDART00000125064	229.852	396.14	315.456	674.27	934.359	313.816	804.315	-1.37393	0.0323965			ncrna:rRNA chromosome:Zv9:18:3045661:3045777:1 gene:ENSDARG00000087073 gene_biotype:rRNA transcript_biotype:rRNA	chr18:3045661-3045777
ENSDART00000137494	30828.6	621.486	15256.9	17.16	51.3544	15569	34.2572	7.80455	0.0323997	degs1	GO:0016705 (oxidoreductase activity, acting on paired donors, with incorporation or reduction of molecular oxygen)	degenerative spermatocyte homolog 1, lipid desaturase (Drosophila) [Source:ZFIN;Acc:ZDB-GENE-030131-5283]	chr13:373956-393703
ENSDART00000111816	2275.08	1147.58	1770.62	4559.19	3619.76	1731.1	4089.47	-1.28608	0.0324134	si:dkey-59l11.10	GO:0005515 (protein binding)	si:dkey-59l11.10 [Source:ZFIN;Acc:ZDB-GENE-120703-17]	chr4:33389208-33400112
ENSDART00000148710	577.523	256.685	1669.19	25.3819	7.06865	834.467	16.2253	5.55059	0.032426	il12rb2	GO:0005515 (protein binding)	interleukin 12 receptor, beta 2a [Source:ZFIN;Acc:ZDB-GENE-080107-3]	chr6:34899221-34916314
ENSDART00000143330	3.57655	4.58158	3.19941	2598	6479.99	3.78585	4539	-10.0984	0.0325122			havana:processed_transcript chromosome:Zv9:23:25167566:25213687:-1 gene:ENSDARG00000094502 gene_biotype:processed_transcript transcript_biotype:processed_transcript	chr23:25167566-25213687
ENSDART00000061426	2791.86	7319.55	1963.83	37.1695	9.65719	4025.08	23.4134	7.49751	0.0325305	rras	GO:0005525 (GTP binding)	related RAS viral (r-ras) oncogene homolog [Source:ZFIN;Acc:ZDB-GENE-041010-217]	chr3:32547722-32553097
ENSDART00000005120	7690.22	974.225	1129.04	75.3905	135.769	3264.5	105.58	4.33194	0.0325379	hsph1	GO:0000902 (cell morphogenesis)	heat shock 105/110 protein 1 [Source:ZFIN;Acc:ZDB-GENE-120410-4]	chr15:30861689-30885714
ENSDART00000152772	407.504	481.578	76.6861	11.9521	10.4134	321.923	11.1828	4.46795	0.0325683	zdhhc16b	GO:0008270 (zinc ion binding)	zinc finger, DHHC domain containing 16b [Source:ZFIN;Acc:ZDB-GENE-040426-1301]	chr12:3427851-3447851
ENSDART00000149549	15063.2	4538.45	212.616	9.1112	3.99342	6604.75	6.55231	8.66031	0.0326431	grsf1		G-rich RNA sequence binding factor 1 [Source:ZFIN;Acc:ZDB-GENE-060825-196]	chr5:44562554-44569545
ENSDART00000078671	44103.1	27301.4	26086.3	14652.1	13332.3	32496.9	13992.2	1.1747	0.032649	hsp70.2	GO:0000902 (cell morphogenesis)	heat shock cognate 70-kd protein, tandem duplicate 2 [Source:ZFIN;Acc:ZDB-GENE-110405-1]	chr3:26912754-26915504
ENSDART00000066973	6748.26	10290.9	11735.8	255.341	116.751	9591.64	186.046	5.75755	0.03267	impdh1b	GO:0018580 (nitronate monooxygenase activity)	inosine 5'-phosphate dehydrogenase 1b [Source:ZFIN;Acc:ZDB-GENE-030219-206]	chr4:18029098-18053665
ENSDART00000135794	17810.7	19795	11567.4	6006.21	7966.17	16391	6986.19	1.20774	0.0327315	sepn1		selenoprotein N, 1 [Source:ZFIN;Acc:ZDB-GENE-030327-7]	chr17:24515495-24523355
ENSDART00000075495	18957.5	18015.6	11177.9	6808.33	7929.8	16050.4	7369.06	1.08886	0.0327485	rpl23	GO:0003735 (structural constituent of ribosome)	ribosomal protein L23 [Source:ZFIN;Acc:ZDB-GENE-030131-8756]	chr3:33558104-33561921
GENSCAN00000023949	459.668	18061.6	3333.53	13.6031	10.2285	7284.95	11.9158	8.00245	0.0327518			cdna:genscan chromosome:Zv9:2:38073355:38119314:1 transcript_biotype:protein_coding	chr2:38073355-38119314
ENSDART00000080437	2962.26	3737.69	1754.34	8150.72	6443.62	2818.1	7297.17	-1.43081	0.0327807	zgc:113030	GO:0046872 (metal ion binding)	zgc:113030 [Source:ZFIN;Acc:ZDB-GENE-050522-528]	chr3:60476452-60481054
ENSDART00000141093	2225.57	1151.79	1708.57	4511.98	3449.01	1695.31	3980.49	-1.26969	0.0328024	si:dkeyp-53e4.4	GO:0005515 (protein binding)	si:dkeyp-53e4.4 [Source:ZFIN;Acc:ZDB-GENE-110913-37]	chr4:39830765-39852533
ENSDART00000042056	9396.25	158.31	1254.97	4.68446	2.69301	3603.18	3.68873	8.43742	0.0328537	phb2a	GO:0016020 (membrane)	prohibitin 2a [Source:ZFIN;Acc:ZDB-GENE-030131-3141]	chr2:4408283-4429954
ENSDART00000045888	2.73961	2.77892	3.10233	25484.2	10110.8	2.87362	17797.5	-12.4498	0.0328661	si:ch211-243c14.1	GO:0016624 (oxidoreductase activity, acting on the aldehyde or oxo group of donors, disulfide as acceptor)	transketolase [Source:HGNC Symbol;Acc:HGNC:11834]	chr11:37829894-37875805
GENSCAN00000014136	179.708	337.917	63.8926	15560.2	4390.5	193.839	9975.37	-5.717	0.0328669			cdna:genscan chromosome:Zv9:5:53615217:53620524:1 transcript_biotype:protein_coding	chr5:53615217-53620524
ENSDART00000123537	2286.5	1192.99	1846.98	4629.14	3589.94	1775.49	4109.54	-1.24972	0.032874			Uncharacterized protein [Source:UniProtKB/TrEMBL;Acc:H9GYF0]	chrZv9_scaffold3531:2408-15441
ENSDART00000141087	7598.44	31688.8	4641.67	516.065	149.061	14643	332.563	5.22562	0.0329035	crema	GO:0005515 (protein binding)	cAMP responsive element modulator a [Source:ZFIN;Acc:ZDB-GENE-030131-7031]	chr2:43256633-43297713
ENSDART00000155225	17805.5	6440.97	5008.13	1655.2	863.679	9751.54	1259.44	2.79748	0.0329208			havana:lincRNA chromosome:Zv9:7:69801231:69801994:1 gene:ENSDARG00000074925 gene_biotype:lincRNA transcript_biotype:lincRNA	chr7:69801231-69801994
ENSDART00000120771	1690.3	2432.09	1210.11	3731.23	4647.44	1777.5	4189.34	-1.2865	0.032925			ncrna:rRNA chromosome:Zv9:20:53168647:53168763:-1 gene:ENSDARG00000085371 gene_biotype:rRNA transcript_biotype:rRNA	chr20:53168647-53168763
ENSDART00000086985	577.239	4008.98	8387.76	45.1111	37.1923	4324.66	41.1517	6.03587	0.0329307	cbx5	GO:0005634 (nucleus)	chromobox homolog 5 (HP1 alpha homolog, Drosophila) [Source:ZFIN;Acc:ZDB-GENE-030131-5553]	chr23:36348765-36357900
ENSDART00000047471	366.018	272.387	8230.52	2.79684	3.83888	2956.31	3.31786	8.15845	0.0329648	cluha		clustered mitochondria (cluA/CLU1) homolog a [Source:ZFIN;Acc:ZDB-GENE-061103-457]	chr15:24652665-24698402
ENSDART00000059886	7914.23	7091.07	13628.6	820.181	403.816	9544.63	611.998	3.99011	0.0329745	ldha	GO:0004459 (L-lactate dehydrogenase activity)	lactate dehydrogenase A4 [Source:ZFIN;Acc:ZDB-GENE-991026-5]	chr25:25749747-25758098
ENSDART00000133330	94.4761	59.3586	23.0928	8.14649	3.81903	58.9758	5.98276	3.18118	0.0330222	fam214b		family with sequence similarity 214, member B [Source:ZFIN;Acc:ZDB-GENE-060526-330]	chr5:20805535-20836246
GENSCAN00000032162	2.7615	2.87563	3.28778	658.297	357.743	2.97497	508.02	-7.35387	0.0330261			cdna:genscan chromosome:Zv9:24:28096801:28160328:-1 transcript_biotype:protein_coding	chr24:28096801-28160328
ENSDART00000136871	24289.2	18805.3	9793.11	4331.18	2478.14	17629.2	3404.66	2.33035	0.0330787	rpl22l1	GO:0003735 (structural constituent of ribosome)	ribosomal protein L22-like 1 [Source:ZFIN;Acc:ZDB-GENE-060804-3]	chr24:27271784-27276443
ENSDART00000081356	415.607	456.241	241.238	954.523	812.625	371.029	883.574	-1.30019	0.0330883	caps2		calcyphosine 2 [Source:ZFIN;Acc:ZDB-GENE-091204-449]	chr18:6791297-6806325
ENSDART00000123992	21.7734	24.4353	3.80449	928.433	262.17	16.6711	595.302	-5.28548	0.0331124			Uncharacterized protein [Source:UniProtKB/TrEMBL;Acc:F1R849]	chr21:9154766-9156797
GENSCAN00000027825	951.65	832.592	538.027	1536.2	1762	774.09	1649.1	-1.12831	0.033184			cdna:genscan chromosome:Zv9:4:56186639:56222704:1 transcript_biotype:protein_coding	chr4:56186639-56222704
ENSDART00000143739	2016.5	1017.01	1649.4	4274.03	3274.23	1560.97	3774.13	-1.31734	0.0331896	si:dkey-82i20.1	GO:0005515 (protein binding)	NLR family, pyrin domain containing 1 [Source:HGNC Symbol;Acc:HGNC:14374]	chr4:56759764-56811399
ENSDART00000127845	13314.7	24644.8	6530.9	10.5719	47.0417	14830.1	28.8068	9.17525	0.0332543	ssh2a	GO:0016787 (hydrolase activity)	slingshot homolog 2a (Drosophila) [Source:ZFIN;Acc:ZDB-GENE-030131-3810]	chr15:27897512-27936031
GENSCAN00000029986	218.971	128.399	212.177	75.557	72.212	186.516	73.8845	1.29591	0.0332662			cdna:genscan chromosome:Zv9:7:10168133:10179904:-1 transcript_biotype:protein_coding	chr7:10168133-10179904
ENSDART00000149506	66.8469	51.9646	38.0346	121.544	121.786	52.282	121.665	-1.25627	0.033332	nexn		nexilin (F actin binding protein) [Source:ZFIN;Acc:ZDB-GENE-041114-92]	chr8:19036975-19057282
ENSDART00000138504	3427.06	8148.42	3535.84	1104.7	1311.54	5037.1	1208.12	1.94106	0.033344			havana:processed_transcript chromosome:Zv9:10:9625256:9628462:-1 gene:ENSDARG00000092826 gene_biotype:processed_transcript transcript_biotype:retained_intron	chr10:9625256-9628462
ENSDART00000130247	2738.3	1422.08	1835.05	4957.22	4008.37	1998.48	4482.8	-1.21057	0.0333954	si:dkey-250k10.4	GO:0005515 (protein binding)	si:dkey-250k10.4 [Source:ZFIN;Acc:ZDB-GENE-120703-22]	chr4:42181937-42209377
ENSDART00000114268	216.601	327.692	91.0304	1495.55	834.149	211.774	1164.85	-2.58419	0.0334496			Uncharacterized protein [Source:UniProtKB/TrEMBL;Acc:F1QAQ1]	chr12:47349712-47360129
GENSCAN00000010834	33.6869	88.5496	13.9312	739.257	2571.21	45.3892	1655.23	-5.31482	0.0334605			cdna:genscan chromosome:Zv9:14:32849650:32850035:1 transcript_biotype:protein_coding	chr14:32849650-32850035
ENSDART00000127437	2048.74	1125.28	1731.18	4471.39	3314.29	1635.06	3892.84	-1.27912	0.0334763		GO:0005515 (protein binding)	Uncharacterized protein [Source:UniProtKB/TrEMBL;Acc:H9GXE8]	chrZv9_scaffold3488:126204-137398
ENSDART00000125234	2176.08	1101.43	1716.64	4429.75	3431.85	1664.72	3930.8	-1.28287	0.0335021	si:ch211-227e10.1	GO:0005515 (protein binding)	NLR family, pyrin domain containing 1 [Source:HGNC Symbol;Acc:HGNC:14374]	chr4:45087398-45105826
ENSDART00000138428	3454.95	7747.62	3514.3	1156.92	1314.8	4905.62	1235.86	1.88265	0.0335219			havana:processed_transcript chromosome:Zv9:8:28056274:28059877:-1 gene:ENSDARG00000095393 gene_biotype:processed_transcript transcript_biotype:processed_transcript	chr8:28056274-28059877
ENSDART00000142180	5622.84	5589.98	9449.35	15869.9	14098	6887.39	14983.9	-1.1647	0.0335388			havana:processed_transcript chromosome:Zv9:5:55231320:55236346:-1 gene:ENSDARG00000092175 gene_biotype:processed_transcript transcript_biotype:processed_transcript	chr5:55231320-55236346
ENSDART00000016986	13.0994	6.48412	10.0462	3.47817	4.20331	9.87655	3.84074	1.31071	0.0335558	si:ch211-220f16.2	GO:0005794 (Golgi apparatus)	si:ch211-220f16.2 [Source:ZFIN;Acc:ZDB-GENE-070912-199]	chr18:29919221-29970968
ENSDART00000056319	12864.7	12362.6	32097.1	20.0929	4.567	19108.1	12.3299	10.8117	0.0335784	cox6c	GO:0004129 (cytochrome-c oxidase activity)	cytochrome c oxidase subunit VIc [Source:ZFIN;Acc:ZDB-GENE-040724-95]	chr6:52186260-52192348
ENSDART00000140791	24018	525.018	8650.76	11.2061	10.8289	11064.6	11.0175	8.7607	0.0336179	cib1	GO:0005509 (calcium ion binding)	calcium and integrin binding 1 (calmyrin) [Source:ZFIN;Acc:ZDB-GENE-050417-170]	chr25:3190783-3284983
ENSDART00000148047	127.156	66.3369	45.9728	339.674	298.675	79.8218	319.174	-2.12692	0.0336268	inpp4aa	GO:0005515 (protein binding)	inositol polyphosphate-4-phosphatase, type Ia [Source:ZFIN;Acc:ZDB-GENE-060312-5]	chr9:7039613-7109774
ENSDART00000143829	44.8867	23.9609	25.68	8.10585	11.9818	31.5092	10.0438	1.61693	0.0336397	si:ch211-114l13.8		nucleoredoxin-like 1 [Source:HGNC Symbol;Acc:HGNC:25179]	chr1:58691592-58695586
ENSDART00000135230	1852.06	4619.86	127.182	8.27985	4.46234	2199.7	6.37109	7.40273	0.033712	chd7	GO:0005515 (protein binding)	chromodomain helicase DNA binding protein 7 [Source:ZFIN;Acc:ZDB-GENE-070912-179]	chr2:21562193-21617220
ENSDART00000132205	11603.2	26619.2	493.763	11.8803	8.69563	12905.4	10.288	9.03796	0.0337986	hmga1a	GO:0003677 (DNA binding)	high mobility group AT-hook 1a [Source:ZFIN;Acc:ZDB-GENE-010502-1]	chr23:3765200-3773434
ENSDART00000128190	2364.57	1189.32	1860.62	4646.41	3791.9	1804.83	4219.15	-1.27369	0.0338432	si:dkey-193i10.7	GO:0005515 (protein binding)	si:dkey-193i10.7 [Source:ZFIN;Acc:ZDB-GENE-120709-5]	chr4:51726065-51733779
ENSDART00000151498	9.65008	27.3116	32.3104	653.192	2104.14	23.0907	1378.67	-5.84322	0.0338481	zgc:162824	GO:0016740 (transferase activity)	si:dkey-84o3.13 [Source:ZFIN;Acc:ZDB-GENE-120214-12]	chr21:4664965-4668157
ENSDART00000048151	627.349	427.737	237.995	96.4188	137.161	431.027	116.79	1.79735	0.0338651	phactr4a		phosphatase and actin regulator 4a [Source:ZFIN;Acc:ZDB-GENE-051030-69]	chr19:14574561-14661455
ENSDART00000137634	2241.76	1142.49	1738.71	4292.84	3521.24	1707.65	3907.04	-1.24073	0.0340001	si:dkeyp-123a12.2	GO:0005515 (protein binding)	si:dkeyp-123a12.2 [Source:ZFIN;Acc:ZDB-GENE-041210-271]	chr1:37777126-37807877
GENSCAN00000035310	3904.82	3052.65	4444.42	8255.02	11119.5	3800.63	9687.26	-1.35104	0.0340218			cdna:genscan chromosome:Zv9:10:23599123:23637162:-1 transcript_biotype:protein_coding	chr10:23599123-23637162
GENSCAN00000015816	281.104	459.599	168.06	1296.05	1286.25	302.921	1291.15	-2.21042	0.0340878			cdna:genscan chromosome:Zv9:5:75426666:75446423:-1 transcript_biotype:protein_coding	chr5:75426666-75446423
ENSDART00000025550	434.174	2395.26	1523.49	166.881	94.4953	1450.97	130.688	3.21466	0.0341341	top1mt	GO:0003917 (DNA topoisomerase type I activity)	mitochondrial topoisomerase I [Source:ZFIN;Acc:ZDB-GENE-040624-2]	chr24:43770846-43780260
ENSDART00000049425	28095.9	19163.4	19095.1	6693.44	9321.44	22118.1	8007.44	1.46092	0.0341928	sec61al2	GO:0016020 (membrane)	Sec61 alpha like 2 [Source:ZFIN;Acc:ZDB-GENE-021016-2]	chr6:42309321-42320018
ENSDART00000026576	9044.99	2794.14	12358.8	44.3291	9.39045	8065.97	26.8598	8.37743	0.0342058	igfbp1a	GO:0031995 (insulin-like growth factor II binding)	insulin-like growth factor binding protein 1a [Source:ZFIN;Acc:ZDB-GENE-021231-1]	chr20:7029528-7033442
ENSDART00000147057	7.2369	18.7155	166.574	2345.74	15417.9	64.1755	8881.83	-7.73356	0.0342573	cdh1	GO:0005509 (calcium ion binding)	cadherin 1, epithelial [Source:ZFIN;Acc:ZDB-GENE-010606-1]	chr7:56206925-56228078
ENSDART00000141363	489.196	681.612	4196.74	14799.3	39689.6	1789.18	27244.5	-4.43748	0.0342828			cdna:known chromosome:Zv9:2:3881867:3897329:-1 gene:ENSDARG00000063445 gene_biotype:protein_coding transcript_biotype:processed_transcript	chr2:3881867-3897329
ENSDART00000060399	22622	12084.2	9631.12	3962.07	3651.22	14779.1	3806.64	1.86015	0.0343083	drap1	GO:0046982 (protein heterodimerization activity)	DR1-associated protein 1 (negative cofactor 2 alpha) [Source:ZFIN;Acc:ZDB-GENE-030131-400]	chr7:729235-739950
ENSDART00000144277	2321.6	1168.14	1733.08	4499.25	3550.25	1740.94	4024.75	-1.25458	0.0343266	si:dkey-157e10.6	GO:0005515 (protein binding)	si:dkey-157e10.6 [Source:ZFIN;Acc:ZDB-GENE-110913-118]	chr4:44441734-44460814
ENSDART00000152382	46.5765	21.0266	82.1053	6.33392	9.35735	49.9028	7.84564	2.48709	0.0343381	snapc1a		small nuclear RNA activating complex, polypeptide 1a [Source:ZFIN;Acc:ZDB-GENE-040426-1031]	chr20:20386734-20396952
ENSDART00000057697	14693.4	5672.69	1279.01	182.281	45.3205	7215.03	113.801	5.70511	0.0344058	pitpnaa	GO:0003674 (molecular_function)	phosphatidylinositol transfer protein, alpha a [Source:ZFIN;Acc:ZDB-GENE-040426-744]	chr15:27759548-27773895
ENSDART00000104219	16015.5	18386.8	9066.86	4781.88	5546.44	14489.7	5164.16	1.42963	0.0344061	rcor1	GO:0003682 (chromatin binding)	REST corepressor 1 [Source:ZFIN;Acc:ZDB-GENE-050506-79]	chr17:29310772-29330469
ENSDART00000021556	2.75028	2.70004	2.73921	1778.16	3737.69	2.72984	2757.93	-9.88328	0.0344456	si:ch211-51a6.2	GO:0008236 (serine-type peptidase activity)	si:ch211-51a6.2 [Source:ZFIN;Acc:ZDB-GENE-090313-118]	chr13:21920187-21961911
GENSCAN00000015436	46.8694	240.76	109.423	654.233	1287.69	132.351	970.962	-3.09685	0.0344581			cdna:genscan chromosome:Zv9:6:24886412:24923595:1 transcript_biotype:protein_coding	chr6:24886412-24923595
GENSCAN00000021859	15.321	8.48619	13.6581	25.2954	29.1998	12.4884	27.2476	-1.16627	0.0344616			cdna:genscan chromosome:Zv9:22:35407608:35438867:1 transcript_biotype:protein_coding	chr22:35407608-35438867
ENSDART00000127948	13149.2	8937.59	2923.95	295.013	760.085	8336.92	527.549	3.8867	0.0344814	mob1a	GO:0016740 (transferase activity)	MOB kinase activator 1A [Source:ZFIN;Acc:ZDB-GENE-030131-6506]	chr5:72649226-72746353
ENSDART00000137754	2361.01	1722.15	1324.46	4206.81	4040.45	1802.54	4123.63	-1.23395	0.0345109			cdna:pseudogene chromosome:Zv9:22:19555360:19556555:1 gene:ENSDARG00000095619 gene_biotype:unprocessed_pseudogene transcript_biotype:unprocessed_pseudogene	chr22:19555360-19556555
ENSDART00000127996	2.80908	8.95472	3.18169	679.553	2774.65	4.98183	1727.1	-8.31575	0.0345252	degs2	GO:0016705 (oxidoreductase activity, acting on paired donors, with incorporation or reduction of molecular oxygen)	degenerative spermatocyte homolog 2, lipid desaturase (Drosophila) [Source:ZFIN;Acc:ZDB-GENE-080228-1]	chr17:30953541-30959490
ENSDART00000127118	128.956	124.684	93.7416	6.90254	11.384	115.794	9.14325	3.69313	0.0345645	tgm1l4	GO:0003810 (protein-glutamine gamma-glutamyltransferase activity)	transglutaminase 1 like 4 [Source:ZFIN;Acc:ZDB-GENE-050913-29]	chr23:46354748-46365820
ENSDART00000142856	31819.8	50788.1	49514.1	2923.95	5242.2	44040.7	4083.08	3.4603	0.0345903			cdna:known chromosome:Zv9:3:32236675:32237615:1 gene:ENSDARG00000031776 gene_biotype:protein_coding transcript_biotype:retained_intron	chr3:32236675-32237615
ENSDART00000103628	1682.39	4387.99	28997.1	91.4211	75.2056	11689.2	83.3134	6.17281	0.0346396	btbd6a	GO:0005515 (protein binding)	BTB (POZ) domain containing 6a [Source:ZFIN;Acc:ZDB-GENE-080218-26]	chr13:33618071-33622690
ENSDART00000142335	2297.76	1138.51	1757.55	4614.16	3584.19	1731.27	4099.18	-1.29021	0.0346753	si:dkey-204l2.3	GO:0005515 (protein binding)	si:dkey-204l2.3 [Source:ZFIN;Acc:ZDB-GENE-070705-370]	chr4:56359382-56386191
ENSDART00000144826	2.70428	2.76223	2.73456	1678.34	862.992	2.73369	1270.67	-8.78222	0.0346886	tgs1	GO:0016740 (transferase activity)	trimethylguanosine synthase homolog (S. cerevisiae) [Source:ZFIN;Acc:ZDB-GENE-070802-2]	chr2:27761944-27799950
ENSDART00000140762	2237.67	1116.35	1790.86	4451.03	3611.4	1714.96	4031.21	-1.28287	0.0346948	si:ch211-276i6.1	GO:0005515 (protein binding)	si:ch211-276i6.1 [Source:ZFIN;Acc:ZDB-GENE-081103-1]	chr13:48335008-48348199
ENSDART00000099702	860.777	281.32	552.952	92.774	95.1468	565.016	93.9604	2.44499	0.034727	mfsd12a	GO:0016021 (integral component of membrane)	major facilitator superfamily domain containing 12a [Source:ZFIN;Acc:ZDB-GENE-030131-4642]	chr2:22538891-22557288
ENSDART00000136087	5564.83	4928.09	8069.91	13983.6	10959.8	6187.61	12471.7	-1.03327	0.0348029			havana:processed_transcript chromosome:Zv9:8:7462334:7465793:-1 gene:ENSDARG00000093762 gene_biotype:processed_transcript transcript_biotype:processed_transcript	chr8:7462334-7465793
ENSDART00000120315	1122.35	584.429	766.055	1850.11	2049.22	824.279	1949.67	-1.29229	0.0348036			ncrna:rRNA chromosome:Zv9:25:15201465:15201579:1 gene:ENSDARG00000084915 gene_biotype:rRNA transcript_biotype:rRNA	chr25:15201465-15201579
ENSDART00000058085	16169	4914.63	2904.94	671.122	495.202	7996.2	583.162	3.41155	0.034825	zgc:173425	GO:0005515 (protein binding)	HtrA serine peptidase 2 [Source:HGNC Symbol;Acc:HGNC:14348]	chr13:8415801-8665656
ENSDART00000114739	9276.24	8964.14	9092.38	22447.3	25312.5	9110.92	23879.9	-1.38767	0.0349727	pdk2	GO:0016740 (transferase activity)	pyruvate dehydrogenase kinase, isoenzyme 2 [Source:ZFIN;Acc:ZDB-GENE-040426-939]	chr19:6297800-6310636
ENSDART00000002000	2595.03	1371.09	409.385	34.7485	99.1622	1458.5	66.9553	4.27136	0.0349755	stat1a	GO:0005515 (protein binding)	signal transduction and activation of transcription 1a [Source:ZFIN;Acc:ZDB-GENE-980526-499]	chr22:12937862-12966255
ENSDART00000150428	2377.65	1228.56	1839.81	4656.2	3603.53	1815.34	4129.87	-1.2256	0.0349816	si:dkey-156k2.4	GO:0005515 (protein binding)	si:dkey-156k2.4 [Source:ZFIN;Acc:ZDB-GENE-110913-8]	chr4:52999560-53018341
ENSDART00000020743	7478.21	5889.24	1620.8	592.038	414.175	4996.09	503.106	3.06646	0.0350227	cmss1	GO:0008026 (ATP-dependent helicase activity)	cms1 ribosomal small subunit homolog (yeast) [Source:ZFIN;Acc:ZDB-GENE-041010-146]	chr9:31018318-31027446
ENSDART00000154439	5454.01	5187.11	8680.16	14630.4	13961.3	6440.43	14295.9	-1.19048	0.0350248			havana:lincRNA chromosome:Zv9:6:17793575:17794733:-1 gene:ENSDARG00000097199 gene_biotype:lincRNA transcript_biotype:lincRNA	chr6:17793575-17794733
ENSDART00000125286	191.122	176.578	309.799	572.364	857.764	225.833	715.064	-1.68005	0.0351098			ncrna:rRNA chromosome:Zv9:21:43015945:43016063:1 gene:ENSDARG00000090516 gene_biotype:rRNA transcript_biotype:rRNA	chr21:43015945-43016063
ENSDART00000144185	404.624	2643.08	15289.9	11.9386	17.7171	6112.53	14.8279	7.44726	0.0351152			cdna:known chromosome:Zv9:1:4398958:4400816:-1 gene:ENSDARG00000006526 gene_biotype:protein_coding transcript_biotype:retained_intron	chr1:4398958-4400816
ENSDART00000044069	7.30082	8.90674	3.4756	23.36	26.1885	6.56106	24.7743	-2.02168	0.0351222	si:dkey-236e20.3	GO:0008146 (sulfotransferase activity)	si:dkey-236e20.3 [Source:ZFIN;Acc:ZDB-GENE-060503-722]	chr22:15469538-15473417
ENSDART00000113004	14.8099	22.939	13.4091	42.789	63.4177	17.0527	53.1034	-1.65187	0.0351821			pleckstrin and Sec7 domain containing [Source:HGNC Symbol;Acc:HGNC:9507]	chr12:46246876-46267495
ENSDART00000080576	3694.88	4040.45	4253.41	4.7712	10.0575	3996.24	7.41436	9.16973	0.0351948	lratb		lecithin retinol acyltransferase b (phosphatidylcholine--retinol O-acyltransferase b) [Source:ZFIN;Acc:ZDB-GENE-060810-31]	chr1:9286306-9289338
ENSDART00000052420	20.2463	9.51181	9.79452	45.4927	31.6634	13.1842	38.578	-1.61906	0.0352485	si:dkeyp-92c9.2	GO:0016534 (cyclin-dependent protein kinase 5 activator activity)		chr19:25081989-25082942
GENSCAN00000013591	14139.4	23785.2	23499	37804.4	45959.7	20474.5	41882.1	-1.06534	0.0352796			cdna:genscan chromosome:Zv9:16:19888752:19888948:-1 transcript_biotype:protein_coding	chr16:19888752-19888948
ENSDART00000117783	23.0928	34.3171	11.662	4.61577	6.05483	23.024	5.3353	1.989	0.0352964			ncrna:miRNA chromosome:Zv9:15:25232522:25232606:1 gene:ENSDARG00000081190 gene_biotype:miRNA transcript_biotype:miRNA	chr15:25232522-25232606
ENSDART00000147256	4982.93	4751.02	7905.65	13083.4	13324.7	5879.87	13204.1	-1.20681	0.0353168			havana:lincRNA chromosome:Zv9:19:16541627:16545637:-1 gene:ENSDARG00000094398 gene_biotype:lincRNA transcript_biotype:lincRNA	chr19:16541627-16545637
ENSDART00000127416	218.587	118.765	290.841	730.637	524.403	209.398	627.52	-1.65773	0.0353273			Uncharacterized protein [Source:UniProtKB/TrEMBL;Acc:F1R910]	chr25:23932480-23946593
ENSDART00000083999	283.732	365.047	127.28	791.07	1088.42	258.686	939.746	-1.97378	0.0353577	raly	GO:0000166 (nucleotide binding)	RNA binding protein, autoantigenic (hnRNP-associated with lethal yellow homolog (mouse)) [Source:ZFIN;Acc:ZDB-GENE-041010-127]	chr6:49973816-50155348
ENSDART00000154640	12246.1	17056.8	7975.72	33.0546	9.98016	12426.2	21.5174	9.35024	0.0354476	rrs1	GO:0005634 (nucleus)	RRS1 ribosome biogenesis regulator homolog (S. cerevisiae) [Source:ZFIN;Acc:ZDB-GENE-030131-9345]	chr24:24445467-24447595
ENSDART00000150696	7334.95	6120.09	8748.14	16978.4	23026.4	7401.06	20002.4	-1.43299	0.0354558			cdna:known chromosome:Zv9:4:50851737:50852618:-1 gene:ENSDARG00000090769 gene_biotype:protein_coding transcript_biotype:retained_intron	chr4:50851737-50852618
ENSDART00000122712	2310.62	1129.04	1656.6	4389.55	3621.51	1698.76	4005.53	-1.29146	0.0354739		GO:0005515 (protein binding)	Uncharacterized protein [Source:UniProtKB/TrEMBL;Acc:H9GYA7]	chrZv9_scaffold3473:56632-67808
ENSDART00000143948	8.78798	8.49518	5.61709	1969.87	5193	7.63342	3581.43	-8.73912	0.0354764	rfc1	GO:0003689 (DNA clamp loader activity)	replication factor C (activator 1) 1 [Source:ZFIN;Acc:ZDB-GENE-070410-99]	chr1:22017139-22042663
ENSDART00000099090	19.1174	2.67468	2.8006	518.182	129.692	8.19757	323.937	-5.63083	0.0354865			cdna:pseudogene chromosome:Zv9:18:31671810:31672803:1 gene:ENSDARG00000092034 gene_biotype:processed_pseudogene transcript_biotype:processed_pseudogene	chr18:31671810-31672803
ENSDART00000153164	33880.9	17662.1	12927.4	171.546	51.1034	21490.1	111.324	7.72267	0.0355485			cdna:putative chromosome:Zv9:20:31243447:31248935:1 gene:ENSDARG00000009001 gene_biotype:protein_coding transcript_biotype:processed_transcript	chr20:31243447-31248935
ENSDART00000145976	949.029	7182.59	11510.8	90.6576	126.145	6547.46	108.401	5.32312	0.035599	serpinh1b		serpin peptidase inhibitor, clade H (heat shock protein 47), member 1b [Source:ZFIN;Acc:ZDB-GENE-990415-93]	chr15:28732298-28736597
ENSDART00000150612	2240.93	1120.69	1651.02	4396.66	3384.11	1670.88	3890.38	-1.26364	0.0356073	si:ch211-207e19.2	GO:0005515 (protein binding)	si:ch211-207e19.2 [Source:ZFIN;Acc:ZDB-GENE-041210-227]	chr4:57103567-57118672
ENSDART00000055107	29.9843	51.6067	301.363	2640.73	2012.77	127.651	2326.75	-4.89385	0.0356403	zgc:56292	GO:0038032 (termination of G-protein coupled receptor signaling pathway)	thyroid hormone receptor interactor 10 [Source:HGNC Symbol;Acc:HGNC:12304]	chr1:59764489-59776970
ENSDART00000132468	9954.98	17145.7	912.106	96.7814	61.0552	9337.59	78.9183	6.12892	0.0356553	tpi1b	GO:0004807 (triose-phosphate isomerase activity)	triosephosphate isomerase 1b [Source:ZFIN;Acc:ZDB-GENE-020416-4]	chr16:13986346-14005001
ENSDART00000029121	143.168	4741.04	698.427	6.12913	16.5915	1860.88	11.3603	6.27281	0.0356602	usp5	GO:0005515 (protein binding)	ubiquitin specific protease 5 [Source:ZFIN;Acc:ZDB-GENE-040426-2584]	chr16:13715378-13736328
GENSCAN00000010362	7157.18	6434.23	15037	23787.4	33017	9542.79	28402.2	-1.66343	0.0356865			cdna:genscan chromosome:Zv9:14:53246523:53277139:1 transcript_biotype:protein_coding	chr14:53246523-53277139
ENSDART00000141333	16.267	11.3377	14.8081	47.4283	34.3207	14.1376	40.8745	-1.52926	0.0356912			cdna:known chromosome:Zv9:20:905760:908669:-1 gene:ENSDARG00000006332 gene_biotype:protein_coding transcript_biotype:retained_intron	chr20:905760-908669
ENSDART00000045185	2.93794	4.16576	3.09137	5.97141	7.63642	3.39835	6.80392	-1.00827	0.0356937	lin9	GO:0017053 (transcriptional repressor complex)	lin-9 homolog (C. elegans) [Source:ZFIN;Acc:ZDB-GENE-030131-1747]	chr20:43722971-43747005
ENSDART00000141805	3799.29	9342.43	3825.34	1161.34	1345.11	5655.69	1253.23	2.03994	0.0357681			havana:processed_transcript chromosome:Zv9:9:25424232:25427727:-1 gene:ENSDARG00000094591 gene_biotype:processed_transcript transcript_biotype:processed_transcript	chr9:25424232-25427727
ENSDART00000139538	5342.5	5196.61	8620.56	14046.2	12932.2	6386.56	13489.2	-1.11821	0.0357738			havana:processed_transcript chromosome:Zv9:2:18971244:18972306:-1 gene:ENSDARG00000093463 gene_biotype:processed_transcript transcript_biotype:processed_transcript	chr2:18971244-18972306
ENSDART00000132847	10.6934	6.00429	9.21204	16.0434	19.2929	8.63658	17.6681	-1.06757	0.0357844	si:ch211-134m17.9		family with sequence similarity 35, member A [Source:HGNC Symbol;Acc:HGNC:28773]	chr13:22838427-22855314
ENSDART00000092015	17.4195	84.6075	29.3526	5.75077	2.74143	43.7932	4.2461	3.14424	0.0358901	dcaf12	GO:0005515 (protein binding)	DDB1 and CUL4 associated factor 12 [Source:ZFIN;Acc:ZDB-GENE-061013-363]	chr21:10307345-10335975
ENSDART00000077191	267.04	2142.76	6551.96	47.4367	16.802	2987.25	32.1193	5.78205	0.035892	arl2	GO:0031683 (G-protein beta/gamma-subunit complex binding)	ADP-ribosylation factor-like 2 [Source:ZFIN;Acc:ZDB-GENE-041010-19]	chr7:26214310-26216468
ENSDART00000121373	138.732	207.906	158.938	652.108	454.856	168.525	553.482	-1.71303	0.0359278			ncrna:rRNA chromosome:Zv9:18:19155550:19155666:-1 gene:ENSDARG00000085973 gene_biotype:rRNA transcript_biotype:rRNA	chr18:19155550-19155666
ENSDART00000014916	9.56468	9.14752	12.257	54.7117	38.0828	10.3231	46.3972	-2.15688	0.0359732	klf3	GO:0046872 (metal ion binding)	Kruppel-like factor 3 (basic) [Source:ZFIN;Acc:ZDB-GENE-011116-1]	chr1:17336041-17356958
ENSDART00000153166	124.319	332.339	418.3	16.8616	38.4074	291.653	27.6345	3.34478	0.0360238			havana:antisense chromosome:Zv9:20:52638830:52642712:1 gene:ENSDARG00000096702 gene_biotype:antisense transcript_biotype:antisense	chr20:52638830-52642712
ENSDART00000075568	9.77377	10.3965	168.089	3239.11	2916.18	62.7531	3077.64	-6.89895	0.0360386		GO:0045596 (negative regulation of cell differentiation)	noggin [Source:HGNC Symbol;Acc:HGNC:7866]	chr12:34076792-34078376
ENSDART00000046045	5381.48	259.58	7536.84	11.2421	20.0889	4392.63	15.6655	7.18827	0.0360428	il6st	GO:0005515 (protein binding)	interleukin 6 signal transducer [Source:ZFIN;Acc:ZDB-GENE-080104-6]	chr10:7778351-7811315
ENSDART00000129542	40.5364	33.9576	39.6151	19.1656	15.6247	38.0364	17.3951	1.13183	0.0360856	crispld1b		cysteine-rich secretory protein LCCL domain containing 1b [Source:ZFIN;Acc:ZDB-GENE-040426-1204]	chr2:30094482-30111291
ENSDART00000063704	26.0607	13.3548	21.74	359.545	799.684	20.3852	579.615	-4.77154	0.0361094	si:dkey-237e17.1	GO:0008270 (zinc ion binding)	cysteine-rich protein 3 [Source:HGNC Symbol;Acc:HGNC:17751]	chr17:21794487-21812850
ENSDART00000125144	2356.71	1163.26	1790.3	4609.58	3628.11	1770.09	4118.85	-1.26688	0.036132		GO:0005515 (protein binding)	Uncharacterized protein [Source:UniProtKB/TrEMBL;Acc:H9GYL5]	chrZv9_scaffold3536:312739-323508
ENSDART00000131111	943.675	690.77	42.9911	6.23028	2.80964	559.145	4.51996	6.18188	0.0361353	plrg1	GO:0005515 (protein binding)	pleiotropic regulator 1 [Source:ZFIN;Acc:ZDB-GENE-040426-2787]	chr1:24508317-24524004
ENSDART00000139992	2090.55	1086.99	1651.78	4299.42	3215.88	1609.78	3757.65	-1.25859	0.0361891	si:ch211-76m11.5	GO:0005515 (protein binding)	si:ch211-76m11.5 [Source:ZFIN;Acc:ZDB-GENE-041210-278]	chr1:37641983-37652927
ENSDART00000004601	1824.51	1711.68	4511.98	506.223	483.355	2682.72	494.789	2.28773	0.036195	laptm4a	GO:0016020 (membrane)	lysosomal-associated protein transmembrane 4 alpha [Source:ZFIN;Acc:ZDB-GENE-030131-1024]	chr20:43807556-43818278
ENSDART00000153814	61.2277	775.709	336.974	8782.92	4538.45	391.304	6660.69	-4.64691	0.0362503			havana:antisense chromosome:Zv9:15:21915993:21917403:-1 gene:ENSDARG00000097056 gene_biotype:antisense transcript_biotype:antisense	chr15:21915993-21917403
ENSDART00000132391	2339.86	1216.15	1692.45	4703.47	3494.02	1749.49	4098.75	-1.26336	0.0363031	si:dkey-269p2.1	GO:0005515 (protein binding)	NLR family, pyrin domain containing 1 [Source:HGNC Symbol;Acc:HGNC:14374]	chr13:48365803-48408216
ENSDART00000133866	30.5122	39.5177	22.3597	15.7249	12.0074	30.7965	13.8661	1.12578	0.0363145	ptprz1b	GO:0004725 (protein tyrosine phosphatase activity)	protein tyrosine phosphatase, receptor-type, Z polypeptide 1b [Source:ZFIN;Acc:ZDB-GENE-050506-100]	chr4:4707334-4799310
ENSDART00000139259	1856.87	172.785	839.64	23.3449	46.5976	956.433	34.9712	4.29143	0.036338			cdna:putative chromosome:Zv9:10:15631658:15633717:1 gene:ENSDARG00000002271 gene_biotype:protein_coding transcript_biotype:processed_transcript	chr10:15631658-15633717
GENSCAN00000014428	2332.2	5752.27	6156.5	19457.9	15441.9	4746.99	17449.9	-1.99289	0.0363401			cdna:genscan chromosome:Zv9:22:8051407:8077329:1 transcript_biotype:protein_coding	chr22:8051407-8077329
ENSDART00000154823	3624.16	14933.9	14195	18.0298	3.01567	10917.7	10.5227	10.2786	0.0363699	xpo1b	GO:0005488 (binding)	exportin 1 (CRM1 homolog, yeast) b [Source:ZFIN;Acc:ZDB-GENE-070530-6]	chr17:23792289-23815738
ENSDART00000124520	4.44347	4.8459	8.78664	28.2313	17.4506	6.02534	22.8409	-1.95096	0.0364383		GO:0004713 (protein tyrosine kinase activity)	Uncharacterized protein [Source:UniProtKB/TrEMBL;Acc:E7F3I3]	chr11:2412570-2426637
ENSDART00000146038	5700.92	5622.32	9496.12	15522.2	13965.1	6939.79	14743.6	-1.13011	0.0364388			havana:processed_transcript chromosome:Zv9:21:6112708:6113782:1 gene:ENSDARG00000094239 gene_biotype:processed_transcript transcript_biotype:processed_transcript	chr21:6112708-6113782
ENSDART00000152949	24.9837	12.7915	23.6041	58.0214	58.6494	20.4598	58.3354	-1.57261	0.036474	katnbl1		katanin p80 subunit B-like 1 [Source:ZFIN;Acc:ZDB-GENE-030131-4155]	chr20:29235523-29242144
ENSDART00000130061	1477.46	127.034	419.371	6050.71	12481.5	674.62	9266.1	-4.34184	0.0364829		GO:0005741 (mitochondrial outer membrane)		chr12:50329856-50330361
ENSDART00000138768	2356.64	1161.71	1830.39	4719.58	3654.32	1782.92	4186.95	-1.27908	0.0364987	si:ch211-271g18.1	GO:0005515 (protein binding)	si:ch211-271g18.1 [Source:ZFIN;Acc:ZDB-GENE-081103-38]	chr4:36445845-36457162
ENSDART00000057257	12733	4930.07	1148.56	138.606	31.1928	6270.55	84.8992	5.9841	0.0365304	pitpnaa	GO:0005622 (intracellular)	phosphatidylinositol transfer protein, alpha a [Source:ZFIN;Acc:ZDB-GENE-040426-744]	chr15:27759548-27773895
ENSDART00000134509	2375.67	1199.58	1796.25	4593.89	3565.89	1790.5	4079.89	-1.2317	0.0365561	si:dkey-240n22.3		si:dkey-240n22.3 [Source:ZFIN;Acc:ZDB-GENE-070705-409]	chr4:60916234-60956683
ENSDART00000082264	39.3313	29.3545	14.7056	168.788	361.344	27.7971	265.066	-3.26435	0.0365619	pxdc1b	GO:0035091 (phosphatidylinositol binding)	PX domain containing 1b [Source:ZFIN;Acc:ZDB-GENE-091204-294]	chr24:11223489-11239234
ENSDART00000128391	23203.7	19294.8	1831.91	451.348	142.407	14776.8	296.877	5.20639	0.0365658	si:dkeyp-120h9.1	GO:0015171 (amino acid transmembrane transporter activity)	si:dkeyp-120h9.1 [Source:ZFIN;Acc:ZDB-GENE-070705-534]	chr19:32988502-33011013
ENSDART00000125511	198.412	4870.95	3321.58	8.69563	8.79101	2796.98	8.74332	7.3985	0.0366075	si:zfos-2269b6.1		si:zfos-2269b6.1 [Source:ZFIN;Acc:ZDB-GENE-121214-346]	chr15:42777828-42806426
ENSDART00000124912	2124.9	998.482	1627.63	4374.21	3410.3	1583.67	3892.25	-1.35347	0.0366146	si:dkey-84h14.2	GO:0005515 (protein binding)	NLR family, pyrin domain containing 1 [Source:HGNC Symbol;Acc:HGNC:14374]	chr4:31141125-31164251
ENSDART00000082647	7658.35	8307.52	1964.54	250.388	74.2639	5976.8	162.326	5.19636	0.0366267	acp1	GO:0004726 (non-membrane spanning protein tyrosine phosphatase activity)	acid phosphatase 1, soluble [Source:ZFIN;Acc:ZDB-GENE-050327-12]	chr23:35556318-35589221
ENSDART00000140638	2309.14	1113.46	1816.29	4657.75	3695.4	1746.3	4176.57	-1.31155	0.0366651	si:ch211-76m11.11	GO:0005515 (protein binding)	si:ch211-76m11.11 [Source:ZFIN;Acc:ZDB-GENE-070912-315]	chr1:37578888-37622900
ENSDART00000121804	2242.25	1117.04	1703.78	4269.05	3692.73	1687.69	3980.89	-1.29151	0.0367046	si:ch211-22k7.9	GO:0005515 (protein binding)	si:ch211-22k7.9 [Source:ZFIN;Acc:ZDB-GENE-070424-160]	chr4:33031405-33055809
ENSDART00000077411	4.30326	4.29739	2.90587	5637.02	2012.18	3.83551	3824.6	-9.80168	0.0367231	cxcl12b	GO:0042056 (chemoattractant activity)	chemokine (C-X-C motif) ligand 12b (stromal cell-derived factor 1) [Source:ZFIN;Acc:ZDB-GENE-030721-1]	chr22:27551657-27567596
ENSDART00000114992	2264.11	1112.76	1777.85	4515.88	3534.73	1718.24	4025.3	-1.27723	0.0367896	si:dkeyp-4f2.1	GO:0005515 (protein binding)	si:dkeyp-4f2.1 [Source:ZFIN;Acc:ZDB-GENE-081103-33]	chr4:31628682-31644220
ENSDART00000138924	241.857	53.6936	26.7754	6934.46	1706.47	107.442	4320.46	-5.61234	0.0368765	ftr30	GO:0046872 (metal ion binding)	finTRIM family, member 30 [Source:ZFIN;Acc:ZDB-GENE-070912-106]	chr2:60016649-60031424
ENSDART00000057382	2.97814	3.14533	2.75575	307.304	570.009	2.95974	438.657	-7.14583	0.0369041	fbln5	GO:0005515 (protein binding)	fibulin 5 [Source:ZFIN;Acc:ZDB-GENE-041010-54]	chr13:33379030-33394335
ENSDART00000155067	6.80922	3.07957	151.43	4410.4	1141.88	53.7728	2776.14	-7.25437	0.036905	tom1	GO:0005622 (intracellular)	target of myb1 (chicken) [Source:ZFIN;Acc:ZDB-GENE-060721-1]	chr3:27095848-27122240
ENSDART00000138120	4874.78	127.02	3061.68	10.6045	5.05215	2687.83	7.82831	7.40163	0.0369367	pbdc1	GO:0003674 (molecular_function)	polysaccharide biosynthesis domain containing 1 [Source:ZFIN;Acc:ZDB-GENE-040718-459]	chr10:20137000-20139945
ENSDART00000103243	5.86913	10.9033	5.98124	15040.1	4359.56	7.58457	9699.82	-10.1231	0.0369522			coenzyme Q10 homolog A (S. cerevisiae) [Source:HGNC Symbol;Acc:HGNC:26515]	chr23:34248615-34253348
ENSDART00000126824	208.901	298.811	52.4515	21.1237	11.8246	186.721	16.4742	3.23197	0.0369529	asb13b	GO:0005515 (protein binding)	ankyrin repeat and SOCS box containing 13b [Source:ZFIN;Acc:ZDB-GENE-091118-116]	chr8:11559905-11570445
ENSDART00000054062	7.00332	9.64821	5.06825	2.89484	3.3261	7.23993	3.11047	1.17294	0.0369545	zgc:113355	GO:0004674 (protein serine/threonine kinase activity)	zgc:113355 [Source:ZFIN;Acc:ZDB-GENE-050410-11]	chr14:29446724-29452821
ENSDART00000102202	189.999	90.0282	11.8506	2983.08	1580.19	97.2925	2281.64	-5.20789	0.0370135	zgc:158309	GO:0003824 (catalytic activity)	zgc:158309 [Source:ZFIN;Acc:ZDB-GENE-061201-42]	chr3:48510548-48575616
GENSCAN00000036553	1425.08	968.612	876.733	2.88514	7.37085	1090.14	5.128	7.8523	0.0370176			cdna:genscan chromosome:Zv9:21:19461097:19504058:1 transcript_biotype:protein_coding	chr21:19461097-19504058
ENSDART00000126369	15.0048	77.3572	99.1622	434.308	1012.39	63.8414	723.347	-3.76888	0.0370736	mki67	GO:0005515 (protein binding)	marker of proliferation Ki-67 [Source:ZFIN;Acc:ZDB-GENE-030131-9771]	chr12:11445703-11460368
ENSDART00000144511	14.734	25.1214	14.8633	42.2179	43.2312	18.2395	42.7246	-1.27503	0.037088	si:dkey-9i23.6		si:dkey-9i23.6 [Source:ZFIN;Acc:ZDB-GENE-090313-365]	chr1:45240271-45252009
ENSDART00000064307	2208.3	1080.05	1596.65	4176.56	3337.7	1628.34	3757.13	-1.25756	0.0370992		GO:0005515 (protein binding)	Uncharacterized protein [Source:UniProtKB/TrEMBL;Acc:H9GXE8]	chrZv9_scaffold3488:126204-137398
ENSDART00000145795	221.064	168.412	116.29	513.013	824.56	168.588	668.787	-1.99658	0.0371207			cdna:known chromosome:Zv9:18:30962708:30963512:1 gene:ENSDARG00000018283 gene_biotype:protein_coding transcript_biotype:processed_transcript	chr18:30962708-30963512
ENSDART00000109480	4276.83	2093.52	21093.8	475.342	192.838	9154.71	334.09	4.24416	0.0371394	prdm1b	GO:0005737 (cytoplasm)	PR domain containing 1b, with ZNF domain [Source:ZFIN;Acc:ZDB-GENE-080618-2]	chr19:50088603-50090234
ENSDART00000141405	3125.74	7613.64	180.193	7.65004	17.3943	3639.86	12.5222	7.13791	0.0371653	fastkd1	GO:0005488 (binding)	FAST kinase domains 1 [Source:ZFIN;Acc:ZDB-GENE-040426-1833]	chr9:49220107-49255181
ENSDART00000111799	134.892	26.582	28.7417	402.604	1030.27	63.4052	716.437	-3.77998	0.0372473		GO:0005515 (protein binding)	hepatic and glial cell adhesion molecule [Source:HGNC Symbol;Acc:HGNC:26361]	chr5:59868697-59879039
ENSDART00000144124	2355.62	1147.97	1809.67	4647.44	3645.28	1771.09	4146.36	-1.27759	0.0372829	si:ch211-205a14.11	GO:0005515 (protein binding)	si:ch211-205a14.11 [Source:ZFIN;Acc:ZDB-GENE-070912-184]	chr1:37934585-37947535
ENSDART00000112321	83.8824	42.0265	43.7037	22.4817	15.5541	56.5376	19.0179	1.51945	0.0372898		GO:0005515 (protein binding)	sterile alpha motif domain containing 5 [Source:HGNC Symbol;Acc:HGNC:21180]	chr17:7055763-7056284
ENSDART00000153118	5.81216	4.51266	2.97371	10.7044	8.93602	4.43284	9.8202	-1.19478	0.0372911	si:dkeyp-117h8.2		si:dkeyp-117h8.2 [Source:ZFIN;Acc:ZDB-GENE-041210-321]	chr20:25689446-25738956
ENSDART00000132252	6023.21	8228.3	4854.32	14624.8	11321.5	6368.61	12973.1	-1.04887	0.0373135	si:ch211-227e10.6	GO:0005515 (protein binding)	si:ch211-227e10.6 [Source:ZFIN;Acc:ZDB-GENE-050420-355]	chr4:45240796-45264763
ENSDART00000109783	23210.6	8617.84	6398.19	1690.3	1534.11	12742.2	1612.2	2.75323	0.0374581	si:dkey-112g5.14	GO:0005515 (protein binding)	HtrA serine peptidase 2 [Source:HGNC Symbol;Acc:HGNC:14348]	chr13:8460847-8649744
ENSDART00000108699	3076.07	1528.61	566.24	13.3571	2.69491	1723.64	8.02599	7.85183	0.0374775	coa3		cytochrome C oxidase assembly factor 3 [Source:ZFIN;Acc:ZDB-GENE-060810-187]	chr12:4165759-4168586
ENSDART00000146414	2307.3	1180.88	1803.18	4343.09	3862.01	1763.79	4102.55	-1.2685	0.037521	si:dkeyp-4f2.1	GO:0005515 (protein binding)	si:dkeyp-4f2.1 [Source:ZFIN;Acc:ZDB-GENE-081103-33]	chr4:31628682-31644220
ENSDART00000058801	9.18107	2.72123	43.3278	277.344	1189.32	18.41	733.331	-5.80568	0.0375753	ptk2.2	GO:0004713 (protein tyrosine kinase activity)	protein tyrosine kinase 2b [Source:ZFIN;Acc:ZDB-GENE-031114-5]	chr19:1914202-1971885
ENSDART00000117696	861.43	42.8928	343.06	2.7096	2.79422	415.794	2.75191	6.40493	0.0376618			ncrna:miRNA chromosome:Zv9:14:12903998:12904072:-1 gene:ENSDARG00000080435 gene_biotype:miRNA transcript_biotype:miRNA	chr14:12903998-12904072
ENSDART00000140355	17442.3	23634	16796.7	4533.99	2978.71	19291	3756.35	2.37474	0.0376911			havana:processed_transcript chromosome:Zv9:14:18736486:18738525:1 gene:ENSDARG00000093678 gene_biotype:processed_transcript transcript_biotype:processed_transcript	chr14:18736486-18738525
ENSDART00000141088	55210.3	50665.4	26666.1	14321.9	18035.9	44180.6	16178.9	1.3891	0.0377232			cdna:known chromosome:Zv9:22:39557910:39558724:-1 gene:ENSDARG00000002710 gene_biotype:protein_coding transcript_biotype:retained_intron	chr22:39557910-39558724
ENSDART00000138195	2173.99	7382.12	2989.5	683.62	595.898	4181.87	639.759	2.50923	0.0377299			havana:processed_transcript chromosome:Zv9:5:55994719:56019916:-1 gene:ENSDARG00000094450 gene_biotype:processed_transcript transcript_biotype:processed_transcript	chr5:55994719-56019916
ENSDART00000146464	52.8108	54.0433	25.2419	10214.1	36067.5	44.032	23140.8	-8.84949	0.0377585	swap70b		SWAP switching B-cell complex subunit 70b [Source:ZFIN;Acc:ZDB-GENE-030131-3587]	chr18:16536001-16576008
ENSDART00000123188	2387.24	1200.62	1897.13	4734.15	3648.23	1828.33	4191.19	-1.24084	0.0377618	si:dkey-16p6.1	GO:0005515 (protein binding)	si:dkey-16p6.1 [Source:ZFIN;Acc:ZDB-GENE-081103-43]	chr13:48614472-48642083
ENSDART00000135429	417.865	570.961	1462.37	4211.42	3297.46	817.064	3754.44	-2.40421	0.0377793			cdna:known chromosome:Zv9:4:44308224:44309475:1 gene:ENSDARG00000075856 gene_biotype:protein_coding transcript_biotype:processed_transcript	chr4:44308224-44309475
ENSDART00000132088	2318.37	1139.58	1843.49	4676.74	3606.25	1767.15	4141.5	-1.27665	0.0377867	si:dkeyp-80d11.14	GO:0005515 (protein binding)	si:dkeyp-80d11.14 [Source:ZFIN;Acc:ZDB-GENE-110914-120]	chr4:51546077-51582096
ENSDART00000142359	2.78682	2.72276	2.75504	284.534	168.753	2.75487	226.643	-6.31369	0.0378336	si:ch211-170p16.1		si:ch211-170p16.1 [Source:ZFIN;Acc:ZDB-GENE-070912-152]	chr2:46050492-46053459
ENSDART00000148260	2162.65	1121.4	1609	4315.45	3212.1	1631.02	3763.77	-1.24176	0.0378447	si:dkeyp-33c10.7	GO:0005515 (protein binding)	si:dkeyp-33c10.7 [Source:ZFIN;Acc:ZDB-GENE-070705-538]	chr4:57826437-57856403
ENSDART00000014465	2010.32	10655.8	5232.02	492.645	689.974	5966.04	591.309	3.04784	0.0378955	hip1	GO:0005488 (binding)	huntingtin interacting protein 1 [Source:ZFIN;Acc:ZDB-GENE-010328-15]	chr15:15954405-16043794
ENSDART00000135064	8.83555	3.10146	4.70457	888.205	273.542	5.54719	580.874	-6.60841	0.0379107	lect1		leukocyte cell derived chemotaxin 1 [Source:ZFIN;Acc:ZDB-GENE-010713-1]	chr9:55750086-55769171
ENSDART00000149449	4735.37	3818.39	6490.55	262.95	127.961	5014.77	195.456	4.73827	0.0379115			cdna:known chromosome:Zv9:16:58353854:58363839:1 gene:ENSDARG00000017219 gene_biotype:protein_coding transcript_biotype:processed_transcript	chr16:58353854-58363839
ENSDART00000143980	232.522	47.9262	30.1971	6688.63	1651.78	103.549	4170.2	-5.57855	0.0379575	ftr29	GO:0005515 (protein binding)	finTRIM family, member 29 [Source:ZFIN;Acc:ZDB-GENE-050417-159]	chr2:60047931-60057000
ENSDART00000126434	2156.63	1054.21	1723.55	4252	3419.12	1644.8	3835.56	-1.27411	0.0379665	si:dkey-159n16.2	GO:0005515 (protein binding)	NLR family, pyrin domain containing 1 [Source:HGNC Symbol;Acc:HGNC:14374]	chr4:52584333-52612469
ENSDART00000140272	17993.5	15361.8	13262.7	4343.52	3038.29	15539.3	3690.91	2.0856	0.0379668	wu:fb17f05	GO:0005198 (structural molecule activity)	wu:fb17f05 [Source:ZFIN;Acc:ZDB-GENE-030131-221]	chr22:11885419-11889710
ENSDART00000149385	2.93682	6.01061	6.18267	12.9096	15.1511	5.04336	14.0304	-1.5492	0.0379686	dcun1d1	GO:0005515 (protein binding)	DCN1, defective in cullin neddylation 1, domain containing 1 (S. cerevisiae) [Source:ZFIN;Acc:ZDB-GENE-030131-5443]	chr2:7482658-7495864
ENSDART00000128613	46687.4	27435.2	30821.8	15322.4	16154.3	34981.5	15738.4	1.11389	0.0380089	rps15a	GO:0003735 (structural constituent of ribosome)	ribosomal protein S15a [Source:ZFIN;Acc:ZDB-GENE-030131-8708]	chr3:26666187-26672111
ENSDART00000024453	14058.5	32614.9	217.713	2.81691	6.86322	15630.4	4.84006	10.0431	0.0380439	usp7	GO:0005515 (protein binding)	ubiquitin specific peptidase 7 (herpes virus-associated) [Source:ZFIN;Acc:ZDB-GENE-030131-3656]	chr3:27757624-27791942
ENSDART00000125888	21906.6	16095.4	19764.8	5472.39	3816.78	19255.6	4644.58	2.06331	0.0380627	marcksl1a	GO:0005516 (calmodulin binding)	MARCKS-like 1a [Source:ZFIN;Acc:ZDB-GENE-040426-2146]	chr13:46745086-46748279
ENSDART00000065228	54.8628	18.0113	164.233	717.467	2245.03	79.0359	1481.25	-4.54025	0.0380936	csmd1		CUB and Sushi multiple domains 1 [Source:ZFIN;Acc:ZDB-GENE-050417-402]	chr13:6048357-6050166
ENSDART00000132300	3335.06	8121.74	3361.22	1079.21	1249.25	4939.34	1164.23	1.95398	0.038106			havana:processed_transcript chromosome:Zv9:2:26202283:26204598:-1 gene:ENSDARG00000094683 gene_biotype:processed_transcript transcript_biotype:retained_intron	chr2:26202283-26204598
ENSDART00000147119	2315.21	1136.91	1775.92	4625.27	3529.12	1742.68	4077.2	-1.27282	0.0381063	si:dkey-16p6.1	GO:0005515 (protein binding)	si:dkey-16p6.1 [Source:ZFIN;Acc:ZDB-GENE-081103-43]	chr4:46397364-46411748
ENSDART00000148053	18595.5	6466.41	4191.32	1176.42	940.86	9751.08	1058.64	2.91919	0.0381101		GO:0005515 (protein binding)	HtrA serine peptidase 2 [Source:HGNC Symbol;Acc:HGNC:14348]	chr10:35101085-35114188
ENSDART00000140396	2363.94	1196.79	1772.36	4387.99	3479.62	1777.69	3933.8	-1.1909	0.0381577			cdna:pseudogene chromosome:Zv9:4:46418209:46431061:1 gene:ENSDARG00000092195 gene_biotype:unprocessed_pseudogene transcript_biotype:unprocessed_pseudogene	chr4:46418209-46431061
ENSDART00000155366	20079.1	16914.1	13962.7	5557.27	3859.98	16985.3	4708.62	1.85894	0.0382034	wu:fb17f05	GO:0005198 (structural molecule activity)	wu:fb17f05 [Source:ZFIN;Acc:ZDB-GENE-030131-221]	chr22:11885419-11889710
ENSDART00000112558	10175	1130.67	7821.68	32.6308	4.6618	6375.79	18.6463	8.50513	0.0382036	btf3l4	GO:0003674 (molecular_function)	basic transcription factor 3-like 4 [Source:ZFIN;Acc:ZDB-GENE-040426-1650]	chr11:13161031-13168864
ENSDART00000034109	673.164	4181.24	202.001	13.4796	26.6228	1685.47	20.0512	5.4506	0.0382046	coq3	GO:0008425 (2-polyprenyl-6-methoxy-1,4-benzoquinone methyltransferase activity)	coenzyme Q3 homolog, methyltransferase (yeast) [Source:ZFIN;Acc:ZDB-GENE-040718-364]	chr16:34966820-34977417
ENSDART00000138040	193.41	214.612	380.432	1488.04	2854.19	262.818	2171.12	-3.03817	0.0382385	lhx2a	GO:0008270 (zinc ion binding)	LIM homeobox 2a [Source:ZFIN;Acc:ZDB-GENE-091118-109]	chr21:7907455-7922273
ENSDART00000145386	5266.82	5841.65	11086.1	20654.3	16602.8	7398.18	18628.6	-1.4062	0.0382562			havana:processed_transcript chromosome:Zv9:2:47664280:47665436:1 gene:ENSDARG00000093824 gene_biotype:processed_transcript transcript_biotype:processed_transcript	chr2:47664280-47665436
ENSDART00000146429	2300.99	1135.11	1829.38	4602.55	3552.28	1755.16	4077.41	-1.26344	0.0382845		GO:0005515 (protein binding)	Uncharacterized protein [Source:UniProtKB/TrEMBL;Acc:H9GZL1]	chrZv9_scaffold3491:6133-17980
ENSDART00000152029	2422.55	1200.24	1857.72	4704.93	3655.2	1826.84	4180.06	-1.24094	0.0383041	si:dkey-16p6.1	GO:0005515 (protein binding)	si:dkey-16p6.1 [Source:ZFIN;Acc:ZDB-GENE-081103-43]	chr12:3113481-3130981
ENSDART00000014168	30689.8	33140	19180.1	13921	12133.8	27670	13027.4	1.0505	0.0383114	zfp36l1b	GO:0046872 (metal ion binding)	zinc finger protein 36, C3H type-like 1b [Source:ZFIN;Acc:ZDB-GENE-030131-2391]	chr20:9756205-9761277
ENSDART00000144273	22.3844	5.7531	3.02716	3468.18	26721.6	10.3882	15094.9	-10.3639	0.0383448	si:dkey-226m8.9	GO:0005515 (protein binding)	si:dkey-226m8.9 [Source:ZFIN;Acc:ZDB-GENE-060526-260]	chr5:34840022-34854535
GENSCAN00000036530	125.391	174.237	833.156	17.2071	31.0554	377.595	24.1312	3.50836	0.0383738			cdna:genscan chromosome:Zv9:7:6755728:6757496:1 transcript_biotype:protein_coding	chr7:6755728-6757496
ENSDART00000144429	2196.39	1049.83	1681.4	4281.6	3525.83	1642.54	3903.72	-1.3064	0.0384201	si:dkey-3h2.4	GO:0005515 (protein binding)	si:dkey-3h2.4 [Source:ZFIN;Acc:ZDB-GENE-070705-466]	chr22:29755438-29767494
ENSDART00000114141	2350.12	1199.92	1931.55	4839.23	3633.41	1827.2	4236.32	-1.25291	0.0385226	si:dkey-238g7.1	GO:0005515 (protein binding)	si:dkey-238g7.1 [Source:ZFIN;Acc:ZDB-GENE-120703-11]	chr4:41202561-41226423
ENSDART00000152053	334.304	97.5564	377.641	28.6254	26.8862	269.834	27.7558	3.05734	0.0385629	eif3ha	GO:0005515 (protein binding)	eukaryotic translation initiation factor 3, subunit H, a [Source:ZFIN;Acc:ZDB-GENE-040808-19]	chr16:51486521-51734308
ENSDART00000123156	6176.57	3695.4	6956.72	16114	11552.1	5609.56	13833.1	-1.33318	0.0386003			diacylglycerol lipase, beta [Source:HGNC Symbol;Acc:HGNC:28923]	chr12:1150762-1154073
ENSDART00000155265	65.7896	137.552	89.6233	251.863	204.606	97.6549	228.235	-1.28346	0.0386159	si:ch211-209m20.9	GO:0030246 (carbohydrate binding)	si:ch211-209m20.9 [Source:ZFIN;Acc:ZDB-GENE-131119-90]	chr15:30284966-30287731
ENSDART00000131380	2036.1	1019.25	1695.28	4148.86	3799.29	1583.54	3974.08	-1.38428	0.0386574	si:ch211-76m11.3	GO:0005515 (protein binding)	si:ch211-76m11.3 [Source:ZFIN;Acc:ZDB-GENE-041210-276]	chr1:37672998-37688847
ENSDART00000144506	6065.66	13725	13065.7	3396.36	2927.65	10952.1	3162	1.7055	0.0387391	ptpn13	GO:0005515 (protein binding)	protein tyrosine phosphatase, non-receptor type 13 [Source:ZFIN;Acc:ZDB-GENE-070410-72]	chr21:8734620-8909627
[truncated: 449 more rows]
